# Supplementary material for: Genomic Surveillance Reveals the Rapid Expansion of the XBB Lineage among Circulating SARS-CoV-2 Omicron Lineages in Southeastern Wisconsin, USA
Source: Viruses. 2023 Sep 16;15(9):1940. doi: 10.3390/v15091940 (PMC10535685; doi:10.3390/v15091940)
Supplement: Supplementary file 1 [file viruses-15-01940-s001.zip]

Archive with 7 entries (7 files):
- Supplemental Figures.pdf
- Table_S1.xlsx
- Table_S2.xlsx
- Table_S3.xlsx
- Table_S4.xlsx
- Table_S5.xlsx
- Table_S6.xlsx
