# Supplementary material for: Genomic Surveillance Reveals the Rapid Expansion of the XBB Lineage among Circulating SARS-CoV-2 Omicron Lineages in Southeastern Wisconsin, USA
Source: Viruses. 2023 Sep 16;15(9):1940. doi: 10.3390/v15091940 (PMC10535685; doi:10.3390/v15091940)
Supplement: Supplementary file 1 [file viruses-15-01940-s001.zip › Table_S1.xlsx]

## Sheet: Sheet1
Table S1 – Details of 6,709 SARS-CoV-2 genomes sequenced from nasopharyngeal/nasal swab specimens in the Milwaukee Health Department Laboratory (MHDL) , Nov 2021 – Apr 2023. All these clinical specimens were collected from Southeastern Wisconsin. Refer to the xlsx file.
Virus name	Accession ID	Collection date	Location	Host	Passage	Sequencing technology	Assembly method	Nextclade_Pango	Nextstrain_clade	WHO_clade	GISADI_Clade	AA Substitutions
hCoV-19/USA/WI-MHDL-2021110221/2021	EPI_ISL_6594798	2021-11-01	North America / USA / Wisconsin / Milwaukee County	Human	Original	Illumina MiSeq	DRAGEN COVID lineage v3.5.4	AY.103	21J	Delta	GK	(N_G215C,N_D63G,N_R203M,NSP12_G671S,NSP13_I334V,Spike_G142D,NSP4_A87V,NS3_S26L,NSP8_P178H,Spike_P681R,Spike_R158del,NSP3_P1228L,NS7a_V82A,NSP3_A488S,Spike_F157del,NSP4_T492I,NSP14_A394V,Spike_T19R,NS7a_T120I,NSP3_A1819T,Spike_D138H,N_D377Y,M_I82T,Spike_D950N,NS7b_T40I,NSP13_P77L,Spike_E156G,NSP3_P1469S,Spike_T478K,NSP6_T77A,NSP12_P323L,Spike_D614G,NSP4_V167L,Spike_L452R)
hCoV-19/USA/WI-MHDL-2021110429/2021	EPI_ISL_6861942	2021-11-01	North America / USA / Wisconsin / Milwaukee County	Human	Original	Illumina MiSeq	DRAGEN COVID lineage v3.5.4	AY.44	21J	Delta	GK	(N_G215C,NS8_L60F,N_R203M,NSP12_G671S,Spike_G142D,NS3_S26L,Spike_P681R,Spike_R158del,NSP3_P1228L,NSP14_V125I,NSP3_V1458F,NS7a_V82A,NSP3_A488S,Spike_F157del,NSP4_T492I,NSP14_A394V,Spike_T19R,NS7a_T120I,NSP12_F192V,N_D377Y,NSP13_H164Y,M_I82T,Spike_D950N,NS7b_T40I,NSP3_A1736V,NSP13_P77L,Spike_E156G,NSP3_H1307Y,NSP3_P1469S,Spike_T478K,NSP6_T77A,N_D63S,NSP12_P323L,Spike_D614G,NSP4_V167L,Spike_L452R)
hCoV-19/USA/WI-MHDL-2021110431/2021	EPI_ISL_6861943	2021-11-01	North America / USA / Wisconsin / Milwaukee County	Human	Original	Illumina MiSeq	DRAGEN COVID lineage v3.5.4	AY.118	21J	Delta	GK	(N_G215C,Spike_T95I,N_D63G,NS8_G77C,N_R203M,NSP12_G671S,NSP3_D1256Y,NSP14_V182L,Spike_G142D,NSP2_L204F,NS3_S26L,Spike_P681R,Spike_R158del,NSP3_P1228L,M_A2V,NS7a_V82A,NSP3_A488S,Spike_F157del,NS6_E46V,NSP4_T492I,NSP14_A394V,Spike_T19R,NS7a_T120I,N_D377Y,M_I82T,N_P142S,Spike_D950N,NS7b_T40I,NSP13_P77L,Spike_E156G,NSP3_P1469S,Spike_T478K,NSP12_L638F,NSP6_T77A,NSP12_P323L,Spike_D614G,NSP4_V167L,Spike…
hCoV-19/USA/WI-MHDL-2021110432/2021	EPI_ISL_6861944	2021-11-01	North America / USA / Wisconsin / Milwaukee County	Human	Original	Illumina MiSeq	DRAGEN COVID lineage v3.5.4	AY.25	21J	Delta	GR	(N_V324F,N_G215C,N_D63G,NSP12_G671S,N_R203K,Spike_G142D,NS3_S26L,Spike_P681R,Spike_R158del,NSP3_P1228L,NS7a_V82A,NSP3_A488S,Spike_F157del,NSP4_T492I,NSP14_A394V,Spike_T19R,NS7a_T120I,NSP7_S25L,N_D377Y,M_I82T,Spike_D950N,Spike_S112L,NS7b_T40I,NSP13_P77L,Spike_E156G,NSP3_P1469S,N_G204R,Spike_T478K,NSP6_T77A,NS3_E239Q,NSP12_P323L,Spike_D614G,NSP4_V167L,Spike_L452R)
hCoV-19/USA/WI-MHDL-2021110434/2021	EPI_ISL_6861946	2021-11-01	North America / USA / Wisconsin / Milwaukee County	Human	Original	Illumina MiSeq	DRAGEN COVID lineage v3.5.4	AY.25	21J	Delta	GK	(NSP14_T516I,N_G215C,N_D63G,N_R203M,NSP12_G671S,Spike_G142D,NS3_W131C,NS3_S26L,Spike_P681R,Spike_R158del,NSP3_P1228L,NS7a_V82A,NSP3_A488S,Spike_F157del,NSP4_T492I,NSP14_A394V,Spike_T19R,N_D377Y,M_I82T,Spike_D950N,NS7b_T40I,NSP2_H255Y,NSP13_P77L,Spike_E156G,NSP3_P1469S,Spike_T478K,NSP6_T77A,NS3_E239Q,NSP9_R39K,NSP12_P323L,Spike_D614G,NSP4_V167L,Spike_L452R)
hCoV-19/USA/WI-MHDL-2021110457/2021	EPI_ISL_6861966	2021-11-01	North America / USA / Wisconsin / Milwaukee County	Human	Original	Illumina MiSeq	DRAGEN COVID lineage v3.5.4	AY.113	21J	Delta	GK	(N_G215C,Spike_T95I,N_D63G,N_R203M,NSP12_G671S,Spike_G142D,NSP12_P264S,NS8_V33F,NS3_S26L,NSP15_D91G,NSP12_T344I,Spike_P681R,Spike_R158del,NSP3_P1228L,NSP4_T204I,NS7a_V82A,NSP3_A488S,Spike_F157del,NSP4_T492I,NSP14_A394V,Spike_T19R,NS7a_T120I,N_D377Y,M_I82T,Spike_D950N,NS7b_T40I,NSP13_P77L,Spike_E156G,NSP3_P1469S,Spike_T478K,NSP15_N82S,NSP6_T77A,NSP12_P323L,NSP5_K90R,Spike_D614G,NSP4_V167L,Spike_L4…
hCoV-19/USA/WI-MHDL-2021110458/2021	EPI_ISL_6861967	2021-11-01	North America / USA / Wisconsin / Milwaukee County	Human	Original	Illumina MiSeq	DRAGEN COVID lineage v3.5.4	AY.44	21J	Delta	GK	(N_G215C,N_D63G,N_R203M,NSP12_G671S,NS3_W131C,NS3_S26L,Spike_P681R,NSP3_P1228L,NSP3_A488S,NSP4_T492I,NSP14_A394V,Spike_T19R,NSP12_F192V,M_I82T,Spike_D950N,NS8_W45C,NS7b_T40I,NSP13_P77L,NSP12_G823C,Spike_T478K,NSP6_T77A,NSP12_T26I,NSP12_P323L,Spike_D614G,NSP4_V167L,Spike_L452R)
hCoV-19/USA/WI-MHDL-2021110459/2021	EPI_ISL_6861968	2021-11-01	North America / USA / Wisconsin / Milwaukee County	Human	Original	Illumina MiSeq	DRAGEN COVID lineage v3.5.4	B.1.617.2	21J	Delta	GK	(N_G215C,Spike_T95I,N_D63G,N_R203M,NSP12_G671S,Spike_G142D,NS3_S26L,Spike_P681R,Spike_R158del,NSP3_P1228L,NS3_L95S,NS7a_V82A,NSP3_A488S,Spike_F157del,NSP4_T492I,NSP14_A394V,Spike_T19R,NS7a_T120I,NSP2_A375V,N_D377Y,M_I82T,Spike_D950N,NS7b_T40I,NSP13_P77L,Spike_Q23R,Spike_E156G,NSP3_P1469S,Spike_T478K,NS7a_V71I,NSP6_T77A,NSP4_T237I,NSP12_P323L,Spike_D614G,NSP4_V167L,Spike_L452R)
hCoV-19/USA/WI-MHDL-2021110461/2021	EPI_ISL_6861969	2021-11-01	North America / USA / Wisconsin / Milwaukee County	Human	Original	Illumina MiSeq	DRAGEN COVID lineage v3.5.4	AY.103	21J	Delta	GK	(N_G215C,M_I82T,N_D63G,Spike_D950N,N_R203M,NS7b_T40I,NSP12_G671S,NSP13_I334V,NS3_S26L,NSP8_P178H,Spike_P681R,NSP6_T77A,NSP3_P1228L,NSP12_P323L,Spike_D614G,N_T271I,NSP4_V167L,NSP3_P985S,NSP3_A488S,NSP4_T492I,NSP14_A394V,Spike_T19R)
hCoV-19/USA/WI-MHDL-2021110430/2021	EPI_ISL_6864923	2021-11-01	North America / USA / Wisconsin / Milwaukee County	Human	Original	Illumina MiSeq	DRAGEN COVID lineage v3.5.4	AY.44	21J	Delta	GK	(NS3_V255del,N_G215C,N_D63G,N_R203M,NSP12_G671S,Spike_G142D,NS3_S26L,NSP12_N491T,Spike_P681R,Spike_R158del,NS7a_A66V,NS7a_A64S,NSP3_P1228L,NS7a_F65Y,NS7a_V82A,NSP3_A488S,Spike_F157del,NSP4_T492I,NSP14_A394V,Spike_T19R,NS7a_T120I,NSP12_F192V,N_D377Y,M_I82T,Spike_D950N,NS7a_F63I,NS7b_T40I,NSP3_A1736V,NSP13_P77L,NS7a_S60N,Spike_E156G,NS7a_C67del,NS7a_Q62S,NSP3_P1469S,Spike_T478K,NSP6_T77A,NS7a_A55V,…
hCoV-19/USA/WI-MHDL-2021110284/2021	EPI_ISL_6575752	2021-11-01	North America / USA / Wisconsin / Milwaukee County	Human	Original	MinION	Medaka via Artic 1.2.1	AY.25	21J	Delta	GK	(N_G215C,N_D63G,N_R203M,NSP12_G671S,NSP4_A380V,NS3_S26L,Spike_P681R,Spike_R158del,NSP3_Q940H,NS8_P36L,NSP3_P1228L,NSP3_A488S,Spike_F157del,NSP4_T492I,NSP14_A394V,Spike_T19R,N_D377Y,M_I82T,Spike_D950N,NS7b_T40I,NSP13_P77L,Spike_E156G,NSP3_P1469S,Spike_T478K,NS3_P42S,NSP6_T77A,NS3_E239Q,NSP12_P323L,Spike_D614G,NSP4_V167L,Spike_L452R)
hCoV-19/USA/WI-MHDL-2021110285/2021	EPI_ISL_6575753	2021-11-01	North America / USA / Wisconsin / Milwaukee County	Human	Original	MinION	Medaka via Artic 1.2.1	AY.25	21J	Delta	GK	(N_G215C,N_D63G,N_R203M,NSP12_G671S,NS3_S26L,NSP3_K384N,Spike_P681R,Spike_R158del,NSP3_P1228L,NSP3_A488S,Spike_F157del,NSP4_T492I,NSP14_A394V,Spike_T19R,N_D377Y,M_I82T,Spike_D950N,NS7b_T40I,NSP13_P77L,NSP4_A260T,Spike_E156G,NSP3_P1469S,Spike_T478K,NSP6_T77A,NS3_E239Q,NSP12_P323L,Spike_D614G,NSP4_V167L,Spike_L452R,NSP2_G115C)
hCoV-19/USA/WI-MHDL-2021110283/2021	EPI_ISL_6575756	2021-11-01	North America / USA / Wisconsin / Milwaukee County	Human	Original	MinION	Medaka via Artic 1.2.1	AY.25.1	21J	Delta	GK	(NSP13_S350L,N_G215C,N_D63G,NSP4_I23V,N_R203M,NSP12_G671S,NS3_S26L,Spike_P681R,Spike_T572I,NSP3_P1228L,NSP3_A488S,NSP4_T492I,NSP14_A394V,Spike_T19R,Spike_W258L,N_D377Y,M_I82T,NSP6_C197F,Spike_D950N,NS7b_T40I,NSP13_P77L,NSP3_P1469S,Spike_T478K,NSP6_T77A,NS3_E239Q,NSP12_P323L,Spike_D614G,NSP4_V167L,Spike_L452R,NSP3_D410G)
hCoV-19/USA/WI-MHDL-2021110219/2021	EPI_ISL_6594796	2021-11-02	North America / USA / Wisconsin / Milwaukee County	Human	Original	Illumina MiSeq	DRAGEN COVID lineage v3.5.4	AY.3	21J	Delta	GK	(N_G215C,N_D63G,N_R203M,Spike_I1221V,NSP12_G671S,NSP6_I162V,NS3_S26L,Spike_P681R,NSP3_P1228L,NSP3_A488S,NSP4_T492I,NSP14_A394V,Spike_T19R,N_D377Y,M_I82T,Spike_D950N,NS7b_T40I,NSP13_P77L,NSP3_T656I,NSP3_P1469S,Spike_T478K,NSP6_T77A,NSP12_P323L,Spike_D614G,NSP4_V167L,Spike_L452R)
hCoV-19/USA/WI-MHDL-2021110220/2021	EPI_ISL_6594797	2021-11-02	North America / USA / Wisconsin / Milwaukee County	Human	Original	Illumina MiSeq	DRAGEN COVID lineage v3.5.4	AY.44	21J	Delta	GK	(N_G215C,N_D63G,N_R203M,NSP12_G671S,Spike_G142D,NS3_W131C,NS3_S26L,Spike_P681R,Spike_R158del,NSP3_P1228L,NS7a_V82A,NSP3_A488S,Spike_F157del,NSP4_T492I,NSP14_A394V,Spike_T19R,NS7a_T120I,NSP12_F192V,N_D377Y,M_I82T,Spike_D950N,NS7b_T40I,NSP3_A1736V,NSP13_P77L,Spike_E156G,NSP3_P1469S,Spike_T478K,NSP6_T77A,NSP12_P323L,Spike_D614G,NSP4_V167L,NSP6_L37F,Spike_L452R,N_A90S)
hCoV-19/USA/WI-MHDL-2021110223/2021	EPI_ISL_6594800	2021-11-02	North America / USA / Wisconsin / Kenosha County	Human	Original	Illumina MiSeq	DRAGEN COVID lineage v3.5.4	AY.103	21J	Delta	GK	(N_G215C,N_D63G,N_R203M,NSP12_G671S,NSP13_I334V,Spike_G142D,NS3_L53F,NS3_S26L,NSP8_P178H,Spike_P681R,Spike_R158del,NSP3_P1228L,NSP3_A488S,Spike_F157del,NSP4_T492I,NSP14_A394V,Spike_T19R,N_D377Y,M_I82T,NSP3_M1556T,Spike_D950N,NS7b_T40I,NSP13_P77L,Spike_E156G,NSP3_P1469S,Spike_T478K,NSP6_T77A,NSP12_P323L,Spike_D614G,NSP4_V167L,Spike_L452R)
hCoV-19/USA/WI-MHDL-2021110224/2021	EPI_ISL_6594801	2021-11-02	North America / USA / Wisconsin / Milwaukee County	Human	Original	Illumina MiSeq	DRAGEN COVID lineage v3.5.4	AY.47	21I	Delta	GK	(N_D63G,N_R203M,NSP12_G671S,Spike_V289I,Spike_G142D,N_G18V,NSP6_T181I,NS3_S26L,Spike_P681R,Spike_R158del,NSP3_E815D,NS7a_V82A,NS8_R115C,Spike_F157del,Spike_T19R,NS7a_T120I,Spike_A222V,N_D377Y,M_I82T,NSP6_V149A,Spike_D950N,NSP3_P822L,NSP13_P77L,Spike_E156G,NSP5_G71C,NSP4_A446V,Spike_T478K,NS3_V225I,NSP12_P323L,Spike_D614G,NSP12_N722D,Spike_L452R)
hCoV-19/USA/WI-MHDL-2021110433/2021	EPI_ISL_6861945	2021-11-02	North America / USA / Wisconsin / Milwaukee County	Human	Original	Illumina MiSeq	DRAGEN COVID lineage v3.5.4	AY.118	21J	Delta	GK	(N_G215C,Spike_T95I,N_D63G,NS8_G77C,N_R203M,NSP12_G671S,Spike_G142D,NS3_S26L,Spike_P681R,Spike_R158del,NSP3_P1228L,M_A2V,NSP3_A488S,Spike_F157del,NS6_E46V,NSP4_T492I,NSP14_A394V,Spike_T19R,NS7a_T120I,N_D377Y,M_I82T,Spike_D950N,NS7b_T40I,NSP13_P77L,Spike_E156G,NSP3_P1469S,Spike_T478K,NSP12_L638F,NSP6_T77A,NSP12_P323L,Spike_D614G,NSP4_V167L,Spike_L452R)
hCoV-19/USA/WI-MHDL-2021110435/2021	EPI_ISL_6861947	2021-11-02	North America / USA / Wisconsin / Milwaukee County	Human	Original	Illumina MiSeq	DRAGEN COVID lineage v3.5.4	AY.3	21J	Delta	GK	(N_G215C,N_D63G,N_R203M,NSP12_G671S,NSP6_I162V,Spike_G142D,NS3_S26L,Spike_P681R,Spike_R158del,NSP3_P1228L,NSP3_S1212L,NS7a_V82A,NSP3_A488S,Spike_F157del,NSP4_T492I,NSP14_A394V,Spike_T19R,NS7a_T120I,N_D377Y,M_I82T,Spike_D950N,NS7b_T40I,NSP13_P77L,Spike_E156G,NS7a_F114S,NSP3_P1469S,Spike_T478K,NSP6_T77A,NSP12_P323L,Spike_D614G,NSP4_V167L,Spike_L452R,NSP8_Q19H)
hCoV-19/USA/WI-MHDL-2021110462/2021	EPI_ISL_6861970	2021-11-02	North America / USA / Wisconsin / Milwaukee County	Human	Original	Illumina MiSeq	DRAGEN COVID lineage v3.5.4	AY.3	21J	Delta	GK	(N_G215C,N_D63G,N_R203M,NSP12_G671S,NSP1_G7S,NSP6_I162V,NSP12_H439Y,NS3_S26L,Spike_P681R,Spike_R158del,NSP3_P1228L,NS7a_V82A,NSP3_A488S,Spike_F157del,NSP4_T492I,NSP14_A394V,Spike_T19R,NS7a_T120I,N_P279S,N_D377Y,M_I82T,Spike_D950N,NSP3_T1456I,NS7b_T40I,NSP13_P77L,Spike_E156G,NSP3_P1469S,Spike_T478K,NSP6_T77A,NSP12_P323L,Spike_D614G,NSP4_V167L,Spike_L452R)
hCoV-19/USA/WI-MHDL-2021110463/2021	EPI_ISL_6861971	2021-11-02	North America / USA / Wisconsin / Milwaukee County	Human	Original	Illumina MiSeq	DRAGEN COVID lineage v3.5.4	AY.3	21J	Delta	GK	(N_G215C,N_D63G,N_R203M,NSP12_G671S,NSP6_I162V,Spike_G142D,NS3_W131C,NS3_S26L,NSP12_T643I,Spike_P681R,Spike_R158del,NSP3_P1228L,NS7a_V82A,NSP3_A488S,Spike_F157del,NSP4_T492I,NSP5_P108L,NSP14_A394V,Spike_T19R,NS7a_T120I,N_D377Y,M_I82T,Spike_D950N,NS7b_T40I,NSP13_P77L,Spike_E156G,NSP3_P1469S,Spike_T478K,NSP6_T77A,NSP12_P323L,Spike_D614G,NSP2_G438C,NSP4_V167L,Spike_L452R)
hCoV-19/USA/WI-MHDL-2021110464/2021	EPI_ISL_6861972	2021-11-02	North America / USA / Wisconsin / Milwaukee County	Human	Original	Illumina MiSeq	DRAGEN COVID lineage v3.5.4	AY.44	21J	Delta	GK	(N_G215C,NS8_L60F,N_R203M,NSP12_G671S,Spike_G142D,NS3_S26L,Spike_P681R,Spike_R158del,NSP3_P1228L,NSP14_V125I,NS7a_V82A,NSP3_A488S,Spike_F157del,NSP4_T492I,NSP14_A394V,Spike_T19R,NS7a_T120I,NSP12_F192V,N_D377Y,NSP13_H164Y,M_I82T,Spike_D950N,NS7b_T40I,NSP3_A1736V,NSP13_P77L,Spike_E156G,NSP3_H1307Y,NSP3_P1469S,Spike_T478K,NSP6_T77A,N_D63S,NSP12_P323L,Spike_D614G,NSP4_V167L,Spike_L452R)
hCoV-19/USA/WI-MHDL-2021110465/2021	EPI_ISL_6861973	2021-11-02	North America / USA / Wisconsin / Milwaukee County	Human	Original	Illumina MiSeq	DRAGEN COVID lineage v3.5.4	AY.100	21J	Delta	GK	(N_G215C,Spike_T95I,N_D63G,N_R203M,NSP12_G671S,Spike_G142D,NS3_S26L,NSP13_A296S,Spike_P681R,Spike_R158del,NSP3_P1228L,NS7a_V82A,NSP3_A488S,Spike_F157del,NSP4_T492I,NSP14_A394V,Spike_T19R,NS7a_T120I,N_D377Y,M_I82T,Spike_D950N,NSP6_K263N,NS7b_T40I,NSP13_P77L,Spike_E156G,NSP3_P1469S,NS8_Y31F,Spike_T478K,NSP6_T77A,NSP2_R4C,NSP12_P323L,Spike_D614G,NSP4_V167L,Spike_L452R)
hCoV-19/USA/WI-MHDL-2021120299/2021	EPI_ISL_7828362	2021-11-02	North America / USA / Wisconsin / Milwaukee County	Human	Original	Illumina MiSeq	DRAGEN COVID lineage v3.5.5	B.1.617.2	21J	Delta	GK	(N_G215C,N_D63G,N_R203M,NSP12_G671S,NS3_S26L,NS3_D155Y,Spike_P681R,NSP3_P1228L,NSP2_S138L,NSP3_A488S,NSP4_T492I,NSP14_A394V,Spike_T19R,M_I82T,Spike_D950N,NS7b_T40I,NSP13_P77L,NSP14_A119V,Spike_K854N,NSP3_P1469S,NSP13_I370V,Spike_T478K,NSP12_T870I,NSP6_T77A,NSP12_P323L,Spike_D614G,NSP4_V167L,Spike_L452R,NSP16_T140I)
hCoV-19/USA/WI-MHDL-2021110196/2021	EPI_ISL_6864873	2021-11-02	North America / USA / Wisconsin / Milwaukee County	Human	Original	MinION	ARTIC Pipeline	AY.46.4	21J	Delta	GK	(N_G215C,N_D63G,N_R203M,NSP12_G671S,NS3_S26L,Spike_E661D,NSP4_T143I,Spike_P681R,Spike_R158del,NSP3_P1228L,NSP3_A488S,Spike_F157del,NSP4_T492I,NSP14_A394V,Spike_T19R,M_I82T,Spike_D950N,NS7b_T40I,NSP13_P77L,Spike_E156G,NSP3_P1469S,Spike_T478K,NSP6_T77A,NSP6_A2V,NSP12_P323L,Spike_D614G,NSP4_V167L,Spike_L452R)
hCoV-19/USA/WI-MHDL-2021110293/2021	EPI_ISL_6371359	2021-11-02	North America / USA / Wisconsin / Milwaukee County	Human	Original	Nanopore Clear Dx	BIP-WV6	AY.119	21J	Delta	GK	(N_G215C,Spike_P809S,N_D63G,N_R203M,NSP12_G671S,NS3_S26L,Spike_P681R,Spike_R158del,NSP3_P1228L,NSP9_T24I,NS7a_V82A,NSP3_A488S,Spike_F157del,NSP4_T492I,NSP14_A394V,Spike_T19R,NS7a_T120I,N_D377Y,M_I82T,Spike_D950N,NS7b_T40I,NSP13_P77L,NSP14_A323S,Spike_E156G,N_T247I,NSP6_T77A,NSP12_P323L,Spike_D614G,NSP4_V167L)
hCoV-19/USA/WI-MHDL-2021110294/2021	EPI_ISL_6371360	2021-11-02	North America / USA / Wisconsin / Milwaukee County	Human	Original	Nanopore Clear Dx	BIP-WV6	AY.44	21J	Delta	GK	(N_G215C,N_D63G,N_R203M,NSP12_G671S,N_K355N,NS3_S26L,Spike_P681R,NSP6_V24F,Spike_R158del,NSP3_P1228L,NS7a_V82A,N_Q409H,NSP3_A488S,Spike_F157del,NSP4_T492I,NSP14_A394V,Spike_T19R,NS7a_T120I,NSP6_M86I,NSP12_F192V,N_D377Y,M_I82T,NSP3_T182I,Spike_D950N,NSP4_R228K,NS7b_T40I,NSP3_A1736V,NSP13_P77L,NSP14_M72I,Spike_E156G,NSP6_L167F,NSP6_T77A,NSP12_P323L,Spike_D614G,NSP4_V167L,NS3_H78Q)
hCoV-19/USA/WI-MHDL-2021110302/2021	EPI_ISL_6491499	2021-11-02	North America / USA / Wisconsin / Milwaukee County	Human	Original	Nanopore Clear Dx	BIP-WV6	AY.39	21J	Delta	GK	(N_G215C,N_D63G,N_R203M,NSP12_G671S,NSP16_Q238H,NSP3_E195D,NS3_S26L,Spike_P681R,Spike_R158del,NSP3_P1228L,NS7a_V82A,NSP3_A488S,Spike_F157del,NSP4_T492I,NSP14_A394V,NS7a_T120I,N_D377Y,M_I82T,Spike_D950N,NSP3_G76D,NS7b_T40I,NSP2_A476S,NSP13_P77L,Spike_E156G,NSP6_T77A,NSP12_P323L,Spike_D614G,NSP4_V167L)
hCoV-19/USA/WI-MHDL-2021110306/2021	EPI_ISL_6491501	2021-11-02	North America / USA / Wisconsin / Milwaukee County	Human	Original	Nanopore Clear Dx	BIP-WV6	AY.103	21J	Delta	GK	(N_G215C,N_D63G,N_R203M,NSP12_G671S,NSP13_I334V,NS3_S26L,NSP8_P178H,Spike_P681R,Spike_R158del,NSP3_P1228L,NS7a_V82A,NSP3_A488S,Spike_F157del,NSP4_T492I,NSP14_A394V,Spike_T19R,NS7a_T120I,N_D377Y,M_I82T,Spike_D950N,NS7b_T40I,NSP13_P77L,Spike_E156G,NSP3_P1469S,Spike_T478K,NSP6_T77A,NSP12_P323L,Spike_D614G,Spike_L452R,NSP4_V167L)
hCoV-19/USA/WI-MHDL-2021110307/2021	EPI_ISL_6491502	2021-11-02	North America / USA / Wisconsin / Milwaukee County	Human	Original	Nanopore Clear Dx	BIP-WV6	AY.44	21J	Delta	GK	(N_G215C,NS8_L60F,N_D63G,N_R203M,NSP12_G671S,NS3_S26L,Spike_P681R,Spike_R158del,NSP3_P1228L,NS7a_V82A,NSP3_A488S,Spike_F157del,NSP4_T492I,NSP14_A394V,Spike_T19R,NS7a_T120I,NSP12_F192V,N_D377Y,NSP13_H164Y,M_I82T,Spike_D950N,NS7b_T40I,NSP3_A1736V,Spike_I1210T,NSP13_P77L,Spike_E156G,NSP3_H1307Y,NSP3_P1469S,Spike_T478K,NSP6_T77A,NSP12_P323L,Spike_D614G,NSP4_V167L,Spike_L452R)
hCoV-19/USA/WI-MHDL-2021110308/2021	EPI_ISL_6491503	2021-11-02	North America / USA / Wisconsin / Milwaukee County	Human	Original	Nanopore Clear Dx	BIP-WV6	AY.25	21J	Delta	GK	(N_G215C,N_D63G,N_R203M,NSP12_G671S,NSP2_A518V,NSP3_V477F,NS3_S26L,Spike_P681R,Spike_R158del,NSP3_P1228L,NS7a_V82A,NSP3_A488S,Spike_F157del,NSP4_T492I,NSP14_A394V,Spike_T19R,NS7a_T120I,N_D377Y,M_I82T,Spike_D950N,NS7b_T40I,NSP13_P77L,Spike_E156G,NSP3_P1469S,Spike_T478K,NSP6_T77A,NS3_E239Q,NSP9_R39K,NSP12_P323L,Spike_D614G,NSP4_V167L,Spike_L452R)
hCoV-19/USA/WI-MHDL-2021110309/2021	EPI_ISL_6491504	2021-11-02	North America / USA / Wisconsin / Milwaukee County	Human	Original	Nanopore Clear Dx	BIP-WV6	AY.25	21J	Delta	GK	(N_G215C,N_D63G,N_R203M,NSP12_G671S,NS3_S26L,Spike_P681R,Spike_R158del,NSP3_P1228L,NS7a_V82A,Spike_F157del,NSP3_A488S,NSP4_T492I,NSP14_A394V,Spike_T19R,NS7a_T120I,N_D377Y,M_I82T,Spike_D950N,NS7b_T40I,NSP13_P77L,Spike_E156G,NSP3_P1469S,Spike_T478K,NSP6_T77A,NS3_E239Q,NS6_T21A,NSP12_P323L,Spike_D614G,NSP4_V167L,Spike_L452R,Spike_A522V)
hCoV-19/USA/WI-MHDL-2021110310/2021	EPI_ISL_6491505	2021-11-02	North America / USA / Wisconsin / Milwaukee County	Human	Original	Nanopore Clear Dx	BIP-WV6	AY.44	21J	Delta	GK	(N_G215C,NS8_L60F,N_D63G,N_R203M,NSP12_G671S,NSP6_I49V,NS3_S26L,Spike_P681R,Spike_R158del,NSP3_P1228L,NSP9_T24I,NS7a_V82A,NSP3_A488S,Spike_F157del,Spike_D253G,NSP4_T492I,NSP14_A394V,Spike_T19R,NS7a_T120I,NSP12_F192V,N_D377Y,NSP13_H164Y,M_I82T,Spike_D950N,NS7b_T40I,NSP3_A1736V,NSP13_P77L,NSP2_I100T,Spike_E156G,NSP3_H1307Y,NSP3_P1469S,Spike_T478K,NSP6_T77A,NSP12_P323L,Spike_D614G,NSP4_V167L,Spike_L…
hCoV-19/USA/WI-MHDL-2021110311/2021	EPI_ISL_6491506	2021-11-02	North America / USA / Wisconsin / Milwaukee County	Human	Original	Nanopore Clear Dx	BIP-WV6	AY.3	21J	Delta	GK	(N_G215C,N_D63G,N_R203M,NSP12_G671S,NSP6_I162V,NSP3_E1271D,NS3_S26L,Spike_P681R,Spike_R158del,NSP3_P1228L,NS7a_V82A,NSP3_A488S,Spike_F157del,NSP4_T492I,NSP14_A394V,Spike_T19R,NS7a_T120I,N_D377Y,M_I82T,Spike_D950N,NS7b_T40I,NSP13_P77L,Spike_E156G,NSP3_T955I,NSP3_P1469S,Spike_T478K,NSP6_T77A,NSP12_P323L,Spike_D614G,NSP4_V167L,Spike_L452R)
hCoV-19/USA/WI-MHDL-2021120030/2021	EPI_ISL_7153302	2021-11-02	North America / USA / Wisconsin / Waukesha County	Human	Original	Nanopore Clear Dx	Medaka via artic 1.2.1	AY.103	21J	Delta	GK	(N_G215C,N_D63G,N_R203M,NSP12_G671S,NSP13_I334V,Spike_G142D,NS3_S26L,Spike_K182I,NSP8_P178H,Spike_P681R,Spike_R158del,NSP3_P1228L,NS7a_V82A,NSP3_A488S,Spike_F157del,NSP4_T492I,NSP14_A394V,Spike_T19R,NS7a_T120I,N_D377Y,M_I82T,Spike_D950N,NS7b_T40I,NSP13_P77L,Spike_E156G,NSP3_P1469S,Spike_T478K,NSP6_T77A,NSP12_P323L,Spike_D614G,NSP4_V167L,Spike_L452R)
hCoV-19/USA/WI-MHDL-2021110466/2021	EPI_ISL_6861974	2021-11-03	North America / USA / Wisconsin / Milwaukee County	Human	Original	Illumina MiSeq	DRAGEN COVID lineage v3.5.4	AY.103	21J	Delta	GK	(N_G215C,N_D63G,N_R203M,NSP12_G671S,NSP13_I334V,Spike_G142D,NS3_S26L,Spike_P681R,Spike_R158del,NSP3_P1228L,NSP3_A488S,Spike_F157del,NSP4_T492I,NSP14_A394V,Spike_T19R,NS7a_T120I,N_D377Y,NSP3_S126L,M_I82T,Spike_D950N,NS7b_T40I,NSP13_P77L,Spike_E156G,NSP3_P1469S,Spike_T478K,NSP6_T77A,NS3_W193G,NSP12_P323L,Spike_D614G,NSP4_V167L,Spike_L452R,NSP3_Q1240H)
hCoV-19/USA/WI-MHDL-2021110467/2021	EPI_ISL_6861975	2021-11-03	North America / USA / Wisconsin / Milwaukee County	Human	Original	Illumina MiSeq	DRAGEN COVID lineage v3.5.4	AY.103	21J	Delta	GK	(N_G215C,N_D63G,N_R203M,NSP12_G671S,NSP3_M1901V,NSP13_I334V,NS3_S26L,Spike_P681R,Spike_R158del,NSP3_P1228L,NS6_K42N,NS7a_V82A,NSP3_A488S,Spike_F157del,NSP4_T492I,Spike_T19R,NSP14_A394V,NS7a_T120I,N_D377Y,M_I82T,Spike_D950N,NS7b_T40I,NSP13_P77L,NS7a_E41stop,Spike_E156G,NSP3_P1469S,NSP2_T85I,Spike_T478K,NSP6_T77A,NSP12_V338I,NSP12_P323L,Spike_D614G,NSP4_V167L,Spike_L452R,Spike_P26L)
hCoV-19/USA/WI-MHDL-2021110468/2021	EPI_ISL_6861976	2021-11-03	North America / USA / Wisconsin / Milwaukee County	Human	Original	Illumina MiSeq	DRAGEN COVID lineage v3.5.4	B.1.617.2	21I	Delta	GK	(N_D63G,N_R203M,NSP12_G671S,Spike_G142D,NSP6_T181I,NS3_S26L,Spike_P681R,Spike_R158del,E_S68F,NSP3_L1244F,NS7a_V82A,Spike_F157del,Spike_T19R,NS7a_T120I,Spike_A222V,N_D377Y,M_I82T,NSP6_V149A,Spike_D950N,NSP6_P198S,NSP3_P822L,NSP13_P77L,Spike_E156G,NSP4_A446V,Spike_T478K,NSP9_T67I,NSP12_P323L,Spike_D614G,Spike_L452R,NSP12_V174I)
hCoV-19/USA/WI-MHDL-2021110191/2021	EPI_ISL_6864870	2021-11-03	North America / USA / Wisconsin / Milwaukee County	Human	Original	MinION	ARTIC Pipeline	AY.25	21J	Delta	GK	(N_G215C,N_D63G,N_R203M,NSP12_G671S,NS3_S26L,Spike_P681R,Spike_R158del,NSP3_P1228L,NSP3_A488S,Spike_F157del,NSP4_T492I,NSP14_A394V,Spike_T19R,N_D377Y,M_I82T,Spike_D950N,NS7b_T40I,NSP13_P77L,Spike_E156G,NSP3_P1469S,Spike_T478K,NSP6_T77A,NS3_E239Q,NSP9_R39K,NSP12_P323L,Spike_D614G,NS3_E181V,NSP4_V167L,Spike_L452R,NSP3_A534V)
hCoV-19/USA/WI-MHDL-2021110194/2021	EPI_ISL_6864871	2021-11-03	North America / USA / Wisconsin / Ozaukee County	Human	Original	MinION	ARTIC Pipeline	AY.103	21J	Delta	GK	(N_G215C,N_D63G,N_R203M,NSP12_G671S,NSP13_I334V,NS3_L53F,NS3_S26L,NSP8_P178H,Spike_P681R,Spike_R158del,NSP3_P1228L,NSP3_A488S,Spike_F157del,NSP4_T492I,NSP14_A394V,Spike_T19R,N_D377Y,M_I82T,NSP3_M1556T,Spike_D950N,NS7b_T40I,NSP13_P77L,Spike_E156G,NSP3_P1469S,Spike_T478K,NSP6_T77A,NSP12_P323L,Spike_D614G,NSP4_V167L,Spike_L452R)
hCoV-19/USA/WI-MHDL-2021110296/2021	EPI_ISL_6371361	2021-11-03	North America / USA / Wisconsin / Milwaukee County	Human	Original	Nanopore Clear Dx	BIP-WV6	AY.39	21J	Delta	GK	(N_G215C,N_D63G,N_R203M,NSP12_G671S,NSP16_Q238H,NSP3_E195D,M_G78C,NS3_S26L,Spike_P681R,Spike_R158del,NSP3_P1228L,NS7a_V82A,NSP3_A488S,Spike_F157del,NSP4_T492I,NSP14_A394V,Spike_T19R,NS7a_T120I,NS7a_Q62stop,N_D377Y,M_I82T,Spike_D950N,NS7b_T40I,NSP13_P77L,Spike_E156G,NSP3_P1469S,Spike_T478K,NSP3_V325F,NS7a_V71I,NSP6_T77A,NSP12_P323L,Spike_D614G,NSP4_V167L,Spike_L452R)
hCoV-19/USA/WI-MHDL-2021110297/2021	EPI_ISL_6371362	2021-11-03	North America / USA / Wisconsin / Milwaukee County	Human	Original	Nanopore Clear Dx	BIP-WV6	AY.3	21J	Delta	GK	(N_G215C,N_D63G,N_R203M,NSP12_G671S,NSP6_I162V,NSP12_M666I,NS3_S26L,NS3_D155Y,Spike_P681R,Spike_R158del,NSP3_P1228L,Spike_S172Y,NSP12_T293I,NS7a_V82A,NSP3_A488S,Spike_F157del,NSP4_T492I,NSP14_A394V,Spike_T19R,NS7a_T120I,N_D377Y,M_I82T,Spike_D950N,NS7b_T40I,NSP13_P77L,NSP2_I273T,Spike_E156G,NSP3_P1469S,Spike_T478K,NSP15_T48I,NSP6_T77A,NSP1_G49C,NSP12_P323L,Spike_D614G,NSP4_V167L,Spike_L452R)
hCoV-19/USA/WI-MHDL-2021110298/2021	EPI_ISL_6371363	2021-11-03	North America / USA / Wisconsin / Milwaukee County	Human	Original	Nanopore Clear Dx	BIP-WV6	AY.103	21J	Delta	GK	(N_G215C,N_D63G,N_R203M,NSP12_G671S,NSP13_I334V,Spike_G142D,NS3_S26L,Spike_P681R,Spike_R158del,NSP3_P1228L,NS7a_V82A,NSP3_A488S,Spike_F157del,NSP4_T492I,NSP14_A394V,Spike_T19R,NS7a_T120I,N_D377Y,NSP3_S126L,M_I82T,Spike_D950N,NS7b_T40I,NSP13_P77L,Spike_E156G,NSP3_P1469S,Spike_T478K,NSP6_T77A,NS3_W193G,NSP12_P323L,Spike_D614G,NSP4_V167L,Spike_L452R,NSP3_Q1240H)
hCoV-19/USA/WI-MHDL-2021110299/2021	EPI_ISL_6371364	2021-11-03	North America / USA / Wisconsin / Milwaukee County	Human	Original	Nanopore Clear Dx	BIP-WV6	AY.100	21J	Delta	GK	(N_G215C,N_D63G,N_R203M,NSP12_G671S,NS3_S26L,Spike_P463S,NSP13_A296S,Spike_P681R,NSP3_P1228L,NS7a_V82A,NSP3_A488S,NSP4_T492I,NSP14_A394V,Spike_T19R,NS7a_T120I,N_D377Y,M_I82T,Spike_D950N,NS7b_T40I,NSP13_P77L,NSP10_T102I,NSP3_P1469S,NSP2_P568L,NS8_Y31F,Spike_T478K,NSP6_T77A,NSP12_P323L,Spike_D614G,Spike_L452R,NSP4_V167L)
hCoV-19/USA/WI-MHDL-2021110300/2021	EPI_ISL_6371365	2021-11-03	North America / USA / Wisconsin / Milwaukee County	Human	Original	Nanopore Clear Dx	BIP-WV6	AY.119	21J	Delta	GK	(N_G215C,Spike_P809S,Spike_T95I,N_D63G,N_R203M,NSP12_G671S,Spike_G142D,NS3_S26L,Spike_P681R,Spike_R158del,NSP3_P1228L,NSP9_T24I,NS3_G172C,NS7a_V82A,NSP3_A488S,Spike_F157del,NSP4_T492I,NSP14_A394V,Spike_T19R,NS7a_T120I,N_D377Y,M_I82T,Spike_D950N,NS7b_T40I,NSP13_P77L,NSP14_A323S,Spike_E156G,NS3_V88I,M_V70F,NSP4_A92V,Spike_T478K,NSP6_T77A,NSP12_P323L,Spike_D614G,NSP4_V167L,Spike_L452R)
hCoV-19/USA/WI-MHDL-2021110301/2021	EPI_ISL_6371366	2021-11-03	North America / USA / Wisconsin / Milwaukee County	Human	Original	Nanopore Clear Dx	BIP-WV6	AY.3	21J	Delta	GK	(N_G215C,N_D63G,N_R203M,NSP12_G671S,NSP6_I162V,NS3_S26L,Spike_P681R,Spike_R158del,NS7a_V82A,NSP3_A488S,Spike_F157del,NSP4_T492I,NSP14_A394V,Spike_T19R,NS7a_T120I,N_D377Y,M_I82T,Spike_D950N,NS7b_T40I,NSP13_P77L,Spike_E156G,NSP3_P1469S,NSP6_T77A,NSP12_P323L,Spike_D614G,NSP4_V167L,NSP6_Q208R)
hCoV-19/USA/WI-MHDL-2021110312/2021	EPI_ISL_6491507	2021-11-03	North America / USA / Wisconsin / Milwaukee County	Human	Original	Nanopore Clear Dx	BIP-WV6	AY.100	21J	Delta	GK	(N_G215C,N_D63G,NSP12_G671S,NS3_S26L,NSP13_A296S,Spike_P681R,Spike_R158del,NSP3_P1228L,NS7a_V82A,NSP3_A488S,Spike_F157del,NSP4_T492I,NSP14_A394V,Spike_T19R,NS7a_T120I,N_D377Y,M_I82T,Spike_D950N,NS7b_T40I,NS3_I118V,NSP13_P77L,Spike_E156G,NS3_E102Q,NSP3_P1469S,NS8_Y31F,Spike_T478K,NSP6_T77A,NSP12_P323L,Spike_D614G,NSP4_V167L,Spike_L452R,N_E31A,N_R203V)
hCoV-19/USA/WI-MHDL-2021110313/2021	EPI_ISL_6491508	2021-11-03	North America / USA / Wisconsin / Milwaukee County	Human	Original	Nanopore Clear Dx	BIP-WV6	AY.103	21J	Delta	GK	(N_G215C,N_D63G,N_A208S,N_R203M,NSP12_G671S,NSP13_I334V,NS3_P104S,NS3_S26L,Spike_P681R,Spike_R158del,NSP3_P1228L,NS7a_V82A,NSP3_A488S,Spike_F157del,NSP4_T492I,Spike_Q677H,NSP14_A394V,Spike_T19R,NS7a_T120I,N_D377Y,M_I82T,Spike_D950N,NS7b_T40I,NSP13_P77L,Spike_E156G,NSP3_P1469S,Spike_T478K,NSP6_T77A,NSP12_P323L,Spike_D614G,NSP4_V167L,Spike_L452R)
hCoV-19/USA/WI-MHDL-2021110314/2021	EPI_ISL_6491509	2021-11-03	North America / USA / Wisconsin / Milwaukee County	Human	Original	Nanopore Clear Dx	BIP-WV6	AY.100	21J	Delta	GK	(N_G215C,N_D63G,NSP12_G671S,NS3_S26L,NSP13_A296S,Spike_P681R,Spike_R158del,NSP3_P1228L,NS7a_V82A,NSP3_A488S,Spike_F157del,NSP4_T492I,NSP14_A394V,Spike_T19R,NS7a_T120I,N_D377Y,M_I82T,Spike_D950N,NS7b_T40I,NS3_I118V,NSP13_P77L,Spike_E156G,NS3_E102Q,NSP3_P1469S,NS8_Y31F,Spike_T478K,NSP6_T77A,NSP12_P323L,Spike_D614G,NSP4_V167L,Spike_L452R,N_E31A,N_R203V)
hCoV-19/USA/WI-MHDL-2021110315/2021	EPI_ISL_6491510	2021-11-03	North America / USA / Wisconsin / Milwaukee County	Human	Original	Nanopore Clear Dx	BIP-WV6	AY.103	21J	Delta	GK	(N_G215C,N_D63G,N_R203M,NSP12_G671S,NSP13_I334V,NS3_S26L,Spike_P681R,Spike_R158del,NSP3_P1228L,NS7a_V82A,NSP3_A488S,Spike_F157del,NSP4_T492I,NSP14_A394V,Spike_T19R,NS7a_T120I,N_D377Y,M_I82T,Spike_D950N,NS7b_T40I,NSP13_P77L,Spike_E156G,NS8_R115S,NSP3_P1469S,Spike_T478K,NS7a_P45L,NSP6_T77A,NSP2_W450C,NSP12_P323L,Spike_D614G,NSP4_V167L,Spike_L452R)
hCoV-19/USA/WI-MHDL-2021110316/2021	EPI_ISL_6491511	2021-11-03	North America / USA / Wisconsin / Milwaukee County	Human	Original	Nanopore Clear Dx	BIP-WV6	AY.39	21J	Delta	GK	(N_G215C,N_D63G,N_R203M,NSP12_G671S,NSP16_Q238H,NSP3_E195D,NSP2_G339S,NS3_S26L,Spike_P681R,Spike_R158del,NSP3_P1228L,NS7a_V82A,NSP3_A488S,Spike_F157del,NSP4_T492I,NSP14_A394V,Spike_T19R,NS7a_T120I,N_D377Y,M_I82T,Spike_D950N,NS7b_T40I,NSP13_P77L,Spike_E156G,NSP3_P1469S,Spike_T478K,NSP3_V325F,NS7a_V71I,NSP6_T77A,NSP12_P323L,NSP15_M218I,Spike_D614G,NSP4_V167L,Spike_L452R)
hCoV-19/USA/WI-MHDL-2021110317/2021	EPI_ISL_6491512	2021-11-03	North America / USA / Wisconsin / Milwaukee County	Human	Original	Nanopore Clear Dx	BIP-WV6	AY.44	21J	Delta	GK	(N_G215C,N_D63G,N_R203M,NSP12_G671S,NS3_S26L,Spike_P681R,Spike_R158del,NSP3_P1228L,NS6_W27L,NS3_G172C,NS7a_V82A,NSP3_A488S,Spike_F157del,NSP4_T492I,NSP14_A394V,Spike_T19R,NS7a_T120I,NSP12_F192V,Spike_G769V,N_D377Y,M_I82T,Spike_D950N,NS8_W45C,NS7b_T40I,NSP3_A1736V,NSP13_P77L,Spike_E156G,NSP3_P1469S,NSP16_V61I,NSP6_T77A,Spike_P26S,NSP12_P323L,Spike_D614G,NSP4_V167L,NSP6_L37F,Spike_A653V)
hCoV-19/USA/WI-MHDL-2021110318/2021	EPI_ISL_6491513	2021-11-03	North America / USA / Wisconsin / Milwaukee County	Human	Original	Nanopore Clear Dx	BIP-WV6	AY.3.1	21J	Delta	GK	(N_G215C,N_D63G,N_R203M,NSP14_H26Y,NSP12_G671S,NSP6_I162V,NS3_S26L,Spike_P681R,Spike_R158del,NSP3_P1228L,NS3_L41I,NS7a_V82A,NSP3_A488S,Spike_F157del,NSP4_T492I,NSP14_A394V,Spike_T19R,NS7a_T120I,N_D377Y,M_I82T,Spike_D950N,NS7b_T40I,NSP13_P77L,Spike_E156G,NSP3_P1469S,Spike_T478K,NSP6_T77A,NSP3_D309Y,NSP12_P323L,Spike_D614G,NSP4_V167L,Spike_L452R)
hCoV-19/USA/WI-MHDL-2021110319/2021	EPI_ISL_6491514	2021-11-03	North America / USA / Wisconsin / Milwaukee County	Human	Original	Nanopore Clear Dx	BIP-WV6	AY.103	21J	Delta	GK	(N_G215C,N_D63G,N_R203M,NSP12_G671S,NSP13_I334V,NSP14_T372I,NS3_S26L,NSP8_P178H,Spike_P681R,Spike_R158del,NSP3_P1228L,NS7a_V82A,NSP3_A488S,Spike_F157del,NSP4_T492I,NSP14_A394V,Spike_T19R,NS7a_T120I,N_D377Y,M_I82T,Spike_D950N,NS7b_T40I,NSP13_P77L,Spike_E156G,NSP3_P1469S,NSP3_K462N,Spike_T478K,NSP6_T77A,NSP12_P323L,Spike_D614G,NSP4_V167L,Spike_L452R,NSP3_L1126S)
hCoV-19/USA/WI-MHDL-2021110321/2021	EPI_ISL_6491515	2021-11-03	North America / USA / Wisconsin / Milwaukee County	Human	Original	Nanopore Clear Dx	BIP-WV6	AY.44	21J	Delta	GK	(N_G215C,NS8_L60F,N_D63G,N_R203M,NSP12_G671S,NS3_S26L,E_V62F,Spike_P681R,Spike_R158del,NSP3_P1228L,NS7a_V82A,NSP3_A488S,Spike_F157del,NSP4_T492I,NSP14_A394V,Spike_T19R,NS7a_T120I,NSP12_F192V,N_D377Y,NSP13_H164Y,M_I82T,Spike_D950N,NS7b_T40I,NSP3_A1736V,NSP13_P77L,Spike_E156G,NSP3_H1307Y,NSP3_P1469S,Spike_T478K,NSP6_T77A,NSP12_P323L,Spike_D614G,NSP4_V167L,Spike_L452R)
hCoV-19/USA/WI-MHDL-2021110436/2021	EPI_ISL_6861948	2021-11-04	North America / USA / Wisconsin / Milwaukee County	Human	Original	Illumina MiSeq	DRAGEN COVID lineage v3.5.4	AY.100	21J	Delta	GK	(N_G215C,Spike_T95I,N_D63G,N_R203M,NSP3_A54T,NSP12_G671S,Spike_G142D,NS3_S26L,NSP13_A296S,Spike_P681R,Spike_R158del,NSP3_P1228L,NS7a_V82A,NSP3_A488S,Spike_F157del,NSP4_T492I,NSP14_A394V,Spike_T19R,NS7a_T120I,N_D377Y,M_I82T,NSP3_N1543K,NSP2_Q584L,Spike_D950N,NS7b_T40I,NSP13_P77L,Spike_E156G,NSP3_P1469S,Spike_T478K,NSP6_T77A,NSP12_P323L,Spike_D614G,NSP4_V167L,Spike_L452R)
hCoV-19/USA/WI-MHDL-2021110437/2021	EPI_ISL_6861949	2021-11-04	North America / USA / Wisconsin / Milwaukee County	Human	Original	Illumina MiSeq	DRAGEN COVID lineage v3.5.4	AY.47	21I	Delta	GK	(N_D63G,N_R203M,NSP12_G671S,Spike_V289I,Spike_G142D,N_G18V,NSP6_T181I,NS3_S26L,Spike_P681R,Spike_R158del,NSP3_E815D,NS7a_V82A,NS8_R115C,Spike_F157del,Spike_T19R,NS7a_T120I,Spike_A222V,N_D377Y,M_I82T,NSP6_V149A,Spike_D950N,NSP3_P822L,NSP13_P77L,Spike_E156G,NSP5_G71C,NSP4_A446V,Spike_T478K,NS3_V225I,NSP12_P323L,Spike_D614G,NSP12_N722D,Spike_L452R)
hCoV-19/USA/WI-MHDL-2021110438/2021	EPI_ISL_6861950	2021-11-04	North America / USA / Wisconsin / Milwaukee County	Human	Original	Illumina MiSeq	DRAGEN COVID lineage v3.5.4	AY.118	21J	Delta	GK	(N_G215C,Spike_V1264L,Spike_T95I,N_D63G,N_R203M,NS3_S171A,NSP12_G671S,NSP2_G339S,Spike_G142D,NS3_S26L,Spike_P681R,Spike_R158del,NSP3_P1228L,NS7a_V82A,NSP3_A488S,Spike_F157del,NS6_E46V,NSP4_T492I,NSP14_A394V,Spike_T19R,NS7a_T120I,N_D377Y,M_I82T,Spike_D950N,NS7b_T40I,NSP13_P77L,Spike_E156G,NSP3_P1469S,NSP2_T531A,Spike_T478K,NSP6_T77A,NSP12_P323L,Spike_D614G,NSP4_V167L,Spike_L452R)
hCoV-19/USA/WI-MHDL-2021110469/2021	EPI_ISL_6861977	2021-11-04	North America / USA / Wisconsin / Milwaukee County	Human	Original	Illumina MiSeq	DRAGEN COVID lineage v3.5.4	B.1.617.2	21J	Delta	GK	(N_G215C,N_D63G,N_R203M,NSP3_K1679N,NSP12_G671S,NS3_S26L,Spike_P681R,NSP3_P1228L,NSP3_A488S,NSP4_T492I,NSP14_A394V,NS7a_T120I,N_D377Y,M_I82T,Spike_D950N,NS7b_T40I,NSP13_P77L,NSP3_P1469S,Spike_T478K,NSP6_T77A,NSP12_P323L,NSP3_K280N,Spike_D614G,NSP4_V167L,Spike_L452R)
hCoV-19/USA/WI-MHDL-2021110197/2021	EPI_ISL_6864874	2021-11-04	North America / USA / Wisconsin / Waukesha County	Human	Original	MinION	ARTIC Pipeline	AY.25	21J	Delta	GK	(N_G215C,N_D63G,N_R203M,NSP12_G671S,NS3_S26L,Spike_P681R,Spike_R158del,NSP3_P1228L,NSP3_A488S,Spike_F157del,NSP4_T492I,NSP14_A394V,Spike_T19R,N_D377Y,M_I82T,Spike_D950N,NS7b_T40I,NSP13_P77L,Spike_E156G,NSP3_P1469S,Spike_T478K,NSP6_T77A,NS3_E239Q,NSP9_R39K,NSP12_P323L,Spike_D614G,NS3_E181V,NSP4_V167L,Spike_L452R,NSP3_A534V)
hCoV-19/USA/WI-MHDL-2021110287/2021	EPI_ISL_6371355	2021-11-04	North America / USA / Wisconsin / Milwaukee County	Human	Original	Nanopore Clear Dx	BIP-WV6	AY.3	21J	Delta	GK	(N_D63G,NSP12_G671S,NSP6_I162V,NS3_S26L,Spike_P681R,NSP3_P1228L,NSP3_A333V,NS7a_V82A,NSP3_A488S,NSP4_T492I,NSP14_A394V,Spike_T19R,NS7a_T120I,Spike_L18F,N_D377Y,M_I82T,Spike_D950N,NS7b_T40I,NSP13_P77L,NSP3_P1469S,Spike_T478K,NSP6_T77A,NSP12_P323L,Spike_D614G,NSP2_Y441H,Spike_L452R,NSP4_V167L,NSP3_L27F)
hCoV-19/USA/WI-MHDL-2021110305/2021	EPI_ISL_6491500	2021-11-04	North America / USA / Wisconsin / Milwaukee County	Human	Original	Nanopore Clear Dx	BIP-WV6	AY.103	21J	Delta	GK	(N_G215C,N_D63G,N_R203M,NSP12_G671S,NSP3_L312F,NSP13_I334V,NS3_S26L,Spike_P681R,Spike_R158del,NSP3_P1228L,NS7a_V82A,NSP3_A488S,Spike_F157del,NSP4_T492I,NSP14_A394V,Spike_T19R,NS7a_T120I,N_D377Y,M_I82T,Spike_D950N,NS7b_T40I,NSP13_P77L,Spike_E156G,NS7a_H47Y,NSP3_P1469S,Spike_T478K,NSP6_T77A,NSP12_P323L,Spike_D614G,NSP4_V167L,Spike_L452R,N_K361T)
hCoV-19/USA/WI-MHDL-2021110322/2021	EPI_ISL_6491516	2021-11-04	North America / USA / Wisconsin / Milwaukee County	Human	Original	Nanopore Clear Dx	BIP-WV6	AY.103	21J	Delta	GK	(N_G215C,N_D63G,N_R203M,NSP12_G671S,NSP13_I334V,NS3_S26L,NSP8_P178H,Spike_P681R,Spike_R158del,NSP3_P1228L,NS7a_V82A,NSP3_A488S,Spike_F157del,NSP4_T492I,NSP14_A394V,Spike_T19R,NS7a_T120I,N_D377Y,M_I82T,Spike_D950N,NS7b_T40I,NSP13_P77L,Spike_E156G,NSP3_P1469S,NSP3_K462N,Spike_T478K,NSP6_T77A,NSP12_P323L,Spike_D614G,NSP4_V167L,Spike_L452R)
hCoV-19/USA/WI-MHDL-2021110323/2021	EPI_ISL_6491517	2021-11-04	North America / USA / Wisconsin / Milwaukee County	Human	Original	Nanopore Clear Dx	BIP-WV6	AY.103	21J	Delta	GK	(N_G215C,N_D63G,N_R203M,NS3_H78Y,NSP12_G671S,NSP13_I334V,NS3_S26L,NSP8_P178H,Spike_P681R,Spike_R158del,NSP3_P1228L,NS7a_V82A,NSP3_A488S,Spike_F157del,NSP4_T492I,NSP14_A394V,Spike_T19R,NS7a_T120I,N_D377Y,M_I82T,Spike_D950N,NS7b_T40I,NSP13_P77L,Spike_E156G,NSP3_P1469S,Spike_T478K,NSP6_T77A,NSP12_P323L,Spike_D614G,NSP4_V167L,Spike_L452R)
hCoV-19/USA/WI-MHDL-2021110324/2021	EPI_ISL_6491518	2021-11-04	North America / USA / Wisconsin / Milwaukee County	Human	Original	Nanopore Clear Dx	BIP-WV6	AY.103	21J	Delta	GK	(N_G215C,N_D63G,N_R203M,NSP12_G671S,NSP13_I334V,NS3_S26L,Spike_P681R,Spike_R158del,NSP3_P1228L,NSP3_I335V,NS7a_T14I,NS7a_V82A,NSP3_A488S,Spike_F157del,NSP4_T492I,NSP14_A394V,Spike_T19R,NS7a_T120I,N_D377Y,M_I82T,Spike_D950N,NS7b_T40I,NSP13_P77L,Spike_E156G,NSP3_P1469S,Spike_T478K,NSP6_T77A,Spike_V16F,NSP12_P323L,Spike_D614G,NSP4_V167L,Spike_L452R,NSP2_Q134K)
hCoV-19/USA/WI-MHDL-2021110325/2021	EPI_ISL_6491519	2021-11-04	North America / USA / Wisconsin / Milwaukee County	Human	Original	Nanopore Clear Dx	BIP-WV6	AY.44	21J	Delta	GK	(N_G215C,N_D63G,N_R203M,NSP12_G671S,NS3_W131C,NS3_S26L,Spike_P681R,Spike_R158del,NSP3_P1228L,NS7a_V82A,NSP3_A488S,Spike_F157del,NSP4_T492I,NSP14_A394V,Spike_T19R,NS7a_T120I,NSP12_F192V,N_D377Y,M_I82T,NS8_W45C,NS7b_T40I,NSP13_P77L,Spike_E156G,NSP12_G823C,NSP3_P1469S,NSP6_T77A,NSP12_T26I,NSP12_P323L,Spike_D614G,NSP4_V167L)
hCoV-19/USA/WI-MHDL-2021110326/2021	EPI_ISL_6491520	2021-11-04	North America / USA / Wisconsin / Milwaukee County	Human	Original	Nanopore Clear Dx	BIP-WV6	AY.103	21J	Delta	GK	(N_G215C,N_D63G,N_R203M,NSP12_G671S,NSP13_I334V,NS3_S26L,NSP8_P178H,Spike_P681R,Spike_R158del,NSP3_P1228L,NS7a_V82A,NSP3_A488S,Spike_F157del,NSP4_T492I,NSP14_A394V,Spike_T19R,NS7a_T120I,N_D377Y,M_I82T,Spike_D950N,NS7b_T40I,NSP13_P77L,Spike_E156G,NSP3_P1469S,NSP3_K462N,Spike_T478K,NSP6_T77A,NSP12_P323L,Spike_D614G,NSP4_V167L,Spike_L452R)
hCoV-19/USA/WI-MHDL-2021110327/2021	EPI_ISL_6491521	2021-11-04	North America / USA / Wisconsin / Milwaukee County	Human	Original	Nanopore Clear Dx	BIP-WV6	AY.119	21J	Delta	GK	(N_G215C,Spike_P809S,N_D63G,N_R203M,NSP12_G671S,NS3_S26L,Spike_P681R,Spike_R158del,NSP3_P1228L,NS3_T9K,NSP9_T24I,NS7a_V82A,NSP3_A488S,Spike_F157del,NSP4_T492I,NSP14_A394V,Spike_T19R,NS7a_T120I,N_D377Y,M_I82T,Spike_D950N,NS7b_T40I,NSP13_P77L,NSP14_A323S,Spike_E156G,NSP3_P1469S,NSP4_A92V,Spike_T478K,NSP6_T77A,NSP15_V22L,NSP12_P323L,Spike_D614G,NSP4_V167L,Spike_L452R)
hCoV-19/USA/WI-MHDL-2021110328/2021	EPI_ISL_6491522	2021-11-04	North America / USA / Wisconsin / Milwaukee County	Human	Original	Nanopore Clear Dx	BIP-WV6	AY.39	21J	Delta	GK	(N_G215C,N_D63G,N_R203M,NSP3_K1679N,NSP12_G671S,NSP16_Q238H,NS3_Y233H,NS3_S26L,Spike_P681R,Spike_R158del,NSP3_P1228L,NS7a_V82A,NSP3_A488S,Spike_F157del,NSP4_T492I,NSP14_A394V,Spike_T19R,NS7a_T120I,N_D377Y,M_I82T,Spike_D950N,NS7b_T40I,NSP13_P77L,Spike_E156G,NSP3_P1469S,NSP12_A449V,Spike_T478K,NS7a_V71I,NSP6_T77A,NSP12_P323L,NSP3_K280N,Spike_D614G,NSP4_V167L,Spike_L452R)
hCoV-19/USA/WI-MHDL-2021110329/2021	EPI_ISL_6491523	2021-11-04	North America / USA / Wisconsin / Milwaukee County	Human	Original	Nanopore Clear Dx	BIP-WV6	AY.39	21J	Delta	GK	(N_G215C,N_D63G,N_R203M,NSP12_G671S,NS3_S26L,Spike_P681R,Spike_R158del,NSP3_P1228L,NS3_L95S,NS7a_V82A,NSP3_A488S,Spike_F157del,NSP4_T492I,NSP14_A394V,NS7a_T120I,NSP2_A375V,N_D377Y,M_I82T,Spike_D950N,NS7b_T40I,NSP13_P77L,Spike_E156G,NSP3_P1469S,NSP16_Q238Y,Spike_T478K,NS7a_V71I,NSP6_T77A,NSP4_T237I,NSP12_P323L,Spike_D614G,NSP4_V167L,Spike_L452R)
hCoV-19/USA/WI-MHDL-2021110330/2021	EPI_ISL_6491524	2021-11-04	North America / USA / Wisconsin / Milwaukee County	Human	Original	Nanopore Clear Dx	BIP-WV6	AY.103	21J	Delta	GK	(N_G215C,N_D63G,N_R203M,NSP12_G671S,NSP13_I334V,NS3_S26L,Spike_P681R,Spike_R158del,NSP3_P1228L,NS7a_V82A,NSP3_A488S,Spike_F157del,NSP4_T492I,NSP14_A394V,Spike_T19R,NS7a_T120I,N_D377Y,M_I82T,Spike_D950N,NS7b_T40I,NSP13_P77L,Spike_E156G,NSP12_A382T,NSP3_P1469S,Spike_T478K,NS8_A14S,NSP6_T77A,NSP12_P323L,NSP16_R216N,Spike_D614G,NSP4_V167L,Spike_L452R)
hCoV-19/USA/WI-MHDL-2021110331/2021	EPI_ISL_6491525	2021-11-04	North America / USA / Wisconsin / Milwaukee County	Human	Original	Nanopore Clear Dx	BIP-WV6	AY.4	21J	Delta	GK	(N_G215C,NSP3_A1711V,NSP3_P1200S,N_D63G,N_R203M,NSP12_G671S,NS3_S26L,Spike_P681R,Spike_R158del,NSP3_P1228L,NSP8_A25S,NS7a_V82A,NSP3_A488S,Spike_F157del,NSP4_T492I,NSP14_A394V,Spike_T19R,NS7a_T120I,N_D377Y,M_I82T,NSP10_T51I,Spike_D950N,NS7b_T40I,NSP13_P77L,Spike_E156G,NS3_G49C,NSP3_P1469S,Spike_T478K,NSP6_T77A,NSP12_P323L,Spike_D614G,NSP4_V167L,Spike_L452R,NSP2_P91L)
hCoV-19/USA/WI-MHDL-2021110332/2021	EPI_ISL_6571150	2021-11-04	North America / USA / Wisconsin / Milwaukee County	Human	Original	Nanopore Clear Dx	BIP-WV6	AY.44	21J	Delta	GK	(N_G215C,NS8_L60F,N_R203M,NSP12_G671S,NS3_S26L,Spike_P681R,NSP3_P1228L,NSP14_V125I,NS7a_V82A,NSP3_A488S,NSP4_T492I,NSP14_A394V,Spike_T19R,NS7a_T120I,NSP12_F192V,N_D377Y,NSP13_H164Y,M_I82T,Spike_D950N,NS7b_T40I,NSP3_A1736V,NSP13_P77L,NSP3_H1307Y,NSP3_P1469S,Spike_T478K,NSP6_T77A,N_D63S,NSP12_P323L,Spike_D614G,Spike_L452R,NSP4_V167L)
hCoV-19/USA/WI-MHDL-2021110333/2021	EPI_ISL_6571151	2021-11-04	North America / USA / Wisconsin / Milwaukee County	Human	Original	Nanopore Clear Dx	BIP-WV6	AY.4	21J	Delta	GK	(N_G215C,NSP3_A1711V,NSP3_P1200S,N_D63G,N_R203M,NSP12_G671S,NS3_S26L,Spike_P681R,Spike_R158del,NSP3_P1228L,NSP8_A25S,NS7a_V82A,NSP3_A488S,Spike_F157del,NSP4_T492I,NSP14_A394V,Spike_T19R,NS7a_T120I,N_D377Y,M_I82T,NSP10_T51I,Spike_D950N,NS7b_T40I,NSP13_P77L,Spike_E156G,NS3_G49C,NSP3_P1469S,Spike_T478K,NSP6_T77A,NSP12_P323L,Spike_D614G,NSP4_V167L,Spike_L452R,NSP2_P91L)
hCoV-19/USA/WI-MHDL-2021110334/2021	EPI_ISL_6571152	2021-11-04	North America / USA / Wisconsin / Milwaukee County	Human	Original	Nanopore Clear Dx	BIP-WV6	AY.103	21J	Delta	GK	(N_G215C,N_D63G,N_R203M,NSP12_G671S,NSP13_I334V,NS3_S26L,Spike_P681R,Spike_R158del,NSP3_P1228L,NS7a_V82A,NSP3_A488S,Spike_F157del,NSP4_T492I,NSP14_A394V,Spike_T19R,NS7a_T120I,N_D377Y,M_I82T,Spike_D950N,NS7b_T40I,NSP13_P77L,Spike_E156G,NSP12_A382T,NSP3_P1469S,Spike_T478K,NS8_A14S,NSP6_T77A,NSP12_P323L,NSP16_R216N,Spike_D614G,NSP4_V167L,Spike_L452R)
hCoV-19/USA/WI-MHDL-2021110337/2021	EPI_ISL_6571155	2021-11-04	North America / USA / Wisconsin / Milwaukee County	Human	Original	Nanopore Clear Dx	BIP-WV6	AY.103	21J	Delta	GK	(N_G215C,N_D63G,N_A208S,N_R203M,NSP12_G671S,NSP13_I334V,NS3_P104S,NS3_S26L,Spike_P681R,Spike_R158del,NSP3_P1228L,NS7a_V82A,NSP3_A488S,Spike_F157del,NSP4_T492I,Spike_Q677H,NSP14_A394V,Spike_T19R,NS7a_T120I,N_D377Y,M_I82T,Spike_D950N,NS7b_T40I,NSP13_P77L,Spike_E156G,NSP3_P1469S,Spike_T478K,NSP6_T77A,NSP12_P323L,Spike_D614G,NSP4_V167L,Spike_L452R)
hCoV-19/USA/WI-MHDL-2021110439/2021	EPI_ISL_6861951	2021-11-05	North America / USA / Wisconsin / Milwaukee County	Human	Original	Illumina MiSeq	DRAGEN COVID lineage v3.5.4	AY.3	21J	Delta	GK	(N_G215C,N_D63G,N_R203M,Spike_I1221V,NSP12_G671S,NSP6_I162V,Spike_G142D,NS3_S26L,Spike_P681R,Spike_R158del,NSP3_P1228L,NS7a_V82A,NSP3_A488S,Spike_F157del,NSP4_T492I,NSP14_A394V,Spike_T19R,NS7a_T120I,N_D377Y,M_I82T,Spike_D950N,NS7b_T40I,NSP13_P77L,Spike_E156G,NSP3_T656I,NSP3_P1469S,Spike_T478K,NSP6_T77A,NSP12_P323L,Spike_D614G,NSP4_V167L,Spike_L452R)
hCoV-19/USA/WI-MHDL-2021110440/2021	EPI_ISL_6861952	2021-11-05	North America / USA / Wisconsin / Milwaukee County	Human	Original	Illumina MiSeq	DRAGEN COVID lineage v3.5.4	AY.3	21J	Delta	GK	(N_G215C,N_D63G,N_R203M,Spike_I1221V,NSP12_G671S,NSP6_I162V,Spike_G142D,NS3_S26L,Spike_P681R,Spike_R158del,NSP3_P1228L,NS7a_P48S,NS7a_V82A,NSP3_A488S,Spike_F157del,NSP4_T492I,NSP14_A394V,Spike_T19R,NS7a_T120I,N_D377Y,M_I82T,Spike_D950N,NS7b_T40I,NSP13_P77L,Spike_E156G,NSP3_T656I,NSP3_P1469S,Spike_T478K,NSP6_T77A,NSP12_P323L,Spike_D614G,NSP4_V167L,Spike_L452R)
hCoV-19/USA/WI-MHDL-2021110441/2021	EPI_ISL_6861953	2021-11-05	North America / USA / Wisconsin / Milwaukee County	Human	Original	Illumina MiSeq	DRAGEN COVID lineage v3.5.4	AY.103	21J	Delta	GK	(N_G215C,N_D63G,N_R203M,NSP12_G671S,NSP13_I334V,Spike_G142D,NS3_S26L,Spike_P681R,Spike_R158del,NS8_C25Y,NSP3_P1228L,NS7a_V82A,NSP3_A488S,Spike_F157del,NSP4_T492I,NSP14_A394V,Spike_T19R,NS7a_T120I,NSP12_P227L,N_D377Y,M_I82T,Spike_D950N,NS7b_T40I,NSP13_P77L,Spike_E156G,NSP8_K37N,NSP3_P1469S,Spike_T478K,NSP6_L260F,NSP6_T77A,NSP12_P323L,Spike_D614G,NSP4_V167L,Spike_L452R)
hCoV-19/USA/WI-MHDL-2021110442/2021	EPI_ISL_6861954	2021-11-05	North America / USA / Wisconsin / Milwaukee County	Human	Original	Illumina MiSeq	DRAGEN COVID lineage v3.5.4	AY.103	21J	Delta	GK	(N_G215C,N_D63G,N_R203M,NSP12_G671S,NSP13_I334V,Spike_G142D,NS3_S26L,NSP9_I65V,Spike_P681R,Spike_R158del,NSP3_P1228L,Spike_H207Y,NS7a_V82A,NSP3_A488S,Spike_F157del,NSP4_T492I,NSP14_A394V,Spike_T19R,NS7a_T120I,N_D377Y,M_I82T,NSP15_G17E,Spike_D950N,NS7b_T40I,NSP13_P77L,NSP16_T117I,Spike_E156G,NSP3_P1469S,Spike_T478K,NSP6_T77A,NSP12_P323L,Spike_D614G,NSP4_V167L,Spike_L452R)
hCoV-19/USA/WI-MHDL-2021110449/2021	EPI_ISL_6861959	2021-11-05	North America / USA / Wisconsin / Milwaukee County	Human	Original	Illumina MiSeq	DRAGEN COVID lineage v3.5.4	AY.3	21J	Delta	GK	(N_G215C,N_D63G,N_R203M,Spike_I1221V,NSP12_G671S,NSP6_I162V,Spike_G142D,NS3_S26L,Spike_P681R,Spike_R158del,NSP3_P1228L,NS7a_P48S,NS7a_V82A,NSP3_A488S,Spike_F157del,NSP4_T492I,NSP14_A394V,Spike_T19R,NS7a_T120I,N_D377Y,M_I82T,Spike_D950N,NS7b_T40I,NSP13_P77L,Spike_E156G,NSP3_T656I,NSP3_P1469S,Spike_T478K,NSP6_T77A,NSP12_P323L,Spike_D614G,NSP4_V167L,Spike_L452R)
hCoV-19/USA/WI-MHDL-2021110452/2021	EPI_ISL_6861962	2021-11-05	North America / USA / Wisconsin / Waukesha County	Human	Original	Illumina MiSeq	DRAGEN COVID lineage v3.5.4	AY.118	21J	Delta	GK	(N_G215C,Spike_T95I,N_D63G,N_R203M,NSP12_G671S,Spike_G142D,NS3_S26L,Spike_P681R,Spike_R158del,NSP3_P1228L,M_A2V,NSP3_A488S,Spike_F157del,NS6_E46V,NSP4_T492I,NSP14_A394V,Spike_T19R,NS7a_T120I,N_D377Y,M_I82T,NSP1_R175H,Spike_D950N,NS7b_T40I,NSP13_P77L,Spike_E156G,NSP3_P1469S,Spike_T478K,NSP6_T77A,NSP12_P323L,Spike_D614G,NSP4_V167L,Spike_L452R)
hCoV-19/USA/WI-MHDL-2021110470/2021	EPI_ISL_6861978	2021-11-05	North America / USA / Wisconsin / Milwaukee County	Human	Original	Illumina MiSeq	DRAGEN COVID lineage v3.5.4	AY.103	21J	Delta	GK	(N_G215C,N_D63G,N_R203M,NS3_H78Y,NSP12_G671S,NSP13_I334V,Spike_G142D,NS3_S26L,NSP8_P178H,Spike_P681R,Spike_R158del,NSP3_P1228L,NS7a_V82A,NSP3_A488S,Spike_F157del,NSP4_T492I,NSP14_A394V,Spike_T19R,NS7a_T120I,N_D377Y,M_I82T,Spike_D950N,NS7b_T40I,NSP13_P77L,Spike_E156G,NSP3_P1469S,Spike_T478K,NSP6_T77A,NSP12_P323L,Spike_D614G,NSP4_V167L,Spike_L452R)
hCoV-19/USA/WI-MHDL-2021110290/2021	EPI_ISL_6371356	2021-11-05	North America / USA / Wisconsin / Milwaukee County	Human	Original	Nanopore Clear Dx	BIP-WV6	AY.39	21J	Delta	GK	(N_G215C,Spike_T95I,N_D63G,N_R203M,NSP12_G671S,NSP16_Q238H,NSP3_E195D,NSP2_G339S,Spike_G142D,NS3_S26L,Spike_P681R,Spike_R158del,NSP3_P1228L,NS7a_V82A,NSP3_A488S,Spike_F157del,NSP4_T492I,NSP14_A394V,Spike_T19R,NS7a_T120I,N_D377Y,M_I82T,Spike_D950N,NS7b_T40I,NSP13_P77L,Spike_E156G,NSP3_P1469S,NSP3_V325F,NS7a_V71I,NSP6_T77A,NSP12_P323L,NSP15_M218I,Spike_D614G,NSP4_V167L)
hCoV-19/USA/WI-MHDL-2021110291/2021	EPI_ISL_6371357	2021-11-05	North America / USA / Wisconsin / Milwaukee County	Human	Original	Nanopore Clear Dx	BIP-WV6	AY.3	21J	Delta	GK	(N_D63G,NSP12_G671S,NSP6_I162V,NSP12_M666I,NS3_S26L,NS3_D155Y,Spike_P681R,Spike_R158del,NSP3_P1228L,Spike_S172Y,NSP12_T293I,NS7a_V82A,NSP3_A488S,Spike_F157del,NSP4_T492I,NSP14_A394V,Spike_T19R,NS7a_T120I,N_D377Y,M_I82T,Spike_D950N,NS7b_T40I,NSP13_P77L,NSP2_I273T,Spike_E156G,NSP3_P1469S,Spike_T478K,NSP15_T48I,NSP6_T77A,NSP1_G49C,NSP12_P323L,Spike_D614G,NSP4_V167L,Spike_L452R)
hCoV-19/USA/WI-MHDL-2021110292/2021	EPI_ISL_6371358	2021-11-05	North America / USA / Wisconsin / Milwaukee County	Human	Original	Nanopore Clear Dx	BIP-WV6	AY.3	21J	Delta	GK	(N_G215C,N_D63G,N_R203M,NSP12_G671S,NSP6_I162V,NSP12_M666I,Spike_G142D,NS3_S26L,NS3_D155Y,Spike_P681R,Spike_R158del,NSP3_P1228L,Spike_S172Y,NSP12_T293I,NS7a_V82A,NSP3_A488S,Spike_F157del,NSP4_T492I,NSP14_A394V,Spike_T19R,NS7a_T120I,N_D377Y,M_I82T,Spike_D950N,NS7b_T40I,NSP13_P77L,NSP2_I273T,Spike_E156G,NSP3_P1469S,Spike_T478K,NSP15_T48I,NSP6_T77A,NSP1_G49C,NSP12_P323L,Spike_D614G,NSP4_V167L,Spike_…
hCoV-19/USA/WI-MHDL-2021110338/2021	EPI_ISL_6571156	2021-11-06	North America / USA / Wisconsin / Milwaukee County	Human	Original	Nanopore Clear Dx	BIP-WV6	AY.119	21J	Delta	GK	(N_G215C,Spike_P809S,N_D63G,N_R203M,NSP12_G671S,NS3_S26L,Spike_P681R,Spike_R158del,NSP3_P1228L,NS3_T9K,NSP9_T24I,NS7a_V82A,NSP3_A488S,Spike_F157del,NSP4_T492I,NSP14_A394V,Spike_T19R,NS7a_T120I,N_D377Y,M_I82T,Spike_D950N,NS7b_T40I,NSP13_P77L,NSP14_A323S,Spike_E156G,NSP3_P1469S,NSP4_A92V,Spike_T478K,NSP6_T77A,NSP12_P323L,Spike_D614G,NSP4_V167L,Spike_L452R)
hCoV-19/USA/WI-MHDL-2021110486/2021	EPI_ISL_7368690	2021-11-06	North America / USA / Wisconsin / Milwaukee County	Human	Original	Nanopore Clear Dx	BIP-WV6	AY.103	21J	Delta	GK	(N_G215C,N_D63G,N_R203M,NSP12_G671S,NSP13_I334V,NS3_S26L,NSP8_P178H,Spike_P681R,Spike_R158del,NSP3_P1228L,NSP12_S68F,NS7a_V82A,NSP3_A488S,Spike_F157del,NSP4_T492I,NSP14_A394V,Spike_T19R,NS7a_T120I,N_D377Y,M_I82T,Spike_D950N,NS7b_T40I,NSP13_P77L,Spike_E156G,NSP3_P1469S,Spike_T478K,NSP6_T77A,NSP12_P323L,Spike_D614G,NSP4_V167L,Spike_L452R)
hCoV-19/USA/WI-MHDL-2021110487/2021	EPI_ISL_7368691	2021-11-06	North America / USA / Wisconsin / Milwaukee County	Human	Original	Nanopore Clear Dx	BIP-WV6	AY.103	21J	Delta	GK	(N_G215C,N_D63G,N_R203M,NSP12_G671S,NSP13_I334V,NS3_S26L,NSP8_P178H,Spike_P681R,Spike_R158del,NSP3_P1228L,NS7a_V82A,NSP3_A488S,Spike_F157del,NSP4_T492I,NSP14_A394V,Spike_T19R,NS7a_T120I,N_D377Y,M_I82T,Spike_D950N,NS7b_T40I,NSP13_P77L,Spike_E156G,NSP3_P1469S,Spike_T478K,NSP6_T77A,NSP12_P323L,Spike_D614G,Spike_L452R,NSP4_V167L)
hCoV-19/USA/WI-MHDL-2021110491/2021	EPI_ISL_7368692	2021-11-06	North America / USA / Wisconsin / Milwaukee County	Human	Original	Nanopore Clear Dx	BIP-WV6	AY.103	21J	Delta	GK	(N_G215C,N_D63G,N_R203M,NSP12_G671S,NSP13_I334V,NS3_S26L,NSP8_P178H,Spike_P681R,Spike_R158del,NSP3_P1228L,NS7a_V82A,NSP3_A488S,Spike_F157del,NSP4_T492I,NSP14_A394V,Spike_T19R,NS7a_T120I,N_D377Y,M_I82T,Spike_D950N,NS7b_T40I,NSP13_P77L,Spike_E156G,NSP3_P1469S,Spike_T478K,NSP6_T77A,NSP12_P323L,Spike_D614G,Spike_L452R,NSP4_V167L)
hCoV-19/USA/WI-MHDL-2021110492/2021	EPI_ISL_7368693	2021-11-06	North America / USA / Wisconsin / Milwaukee County	Human	Original	Nanopore Clear Dx	BIP-WV6	AY.103	21J	Delta	GK	(N_G215C,N_D63G,N_R203M,NSP12_G671S,NSP13_I334V,NS3_S26L,NSP8_P178H,Spike_P681R,Spike_R158del,NSP3_P1228L,NS7a_V82A,NSP3_A488S,Spike_F157del,NSP4_T492I,NSP14_A394V,Spike_T19R,NS7a_T120I,N_D377Y,M_I82T,Spike_D950N,NS7b_T40I,NSP13_P77L,Spike_E156G,NSP3_P1469S,Spike_T478K,NSP6_T77A,NSP12_P323L,Spike_D614G,Spike_L452R,NSP4_V167L)
hCoV-19/USA/WI-MHDL-2021110493/2021	EPI_ISL_7368694	2021-11-06	North America / USA / Wisconsin / Milwaukee County	Human	Original	Nanopore Clear Dx	BIP-WV6	AY.39	21J	Delta	GK	(N_G215C,N_D63G,N_R203M,NSP12_G671S,NS3_S26L,Spike_P681R,Spike_R158del,NSP3_P1228L,NS3_L95S,NS7a_V82A,NSP3_A488S,Spike_F157del,NSP4_T492I,NSP14_A394V,NS7a_T120I,NSP2_A375V,M_I82T,Spike_D950N,NS7b_T40I,NSP13_P77L,Spike_E156G,NSP3_P1469S,NSP16_Q238Y,Spike_T478K,NS7a_V71I,NSP6_T77A,NSP4_T237I,NSP12_P323L,Spike_D614G,NSP4_V167L,Spike_L452R)
hCoV-19/USA/WI-MHDL-2021110494/2021	EPI_ISL_7368695	2021-11-06	North America / USA / Wisconsin / Milwaukee County	Human	Original	Nanopore Clear Dx	BIP-WV6	AY.39	21J	Delta	GK	(N_G215C,N_D63G,N_R203M,NSP12_G671S,NS3_S26L,Spike_P681R,Spike_R158del,NSP3_P1228L,NS3_L95S,NS7a_V82A,NSP3_A488S,Spike_F157del,NSP4_T492I,NSP14_A394V,NS7a_T120I,NSP2_A375V,M_I82T,Spike_D950N,NS7b_T40I,NSP13_P77L,Spike_E156G,NSP3_P1469S,NS8_S67F,NSP16_Q238Y,Spike_T478K,NS7a_V71I,NSP6_T77A,NSP4_T237I,NSP12_P323L,Spike_D614G,NSP4_V167L,Spike_L452R)
hCoV-19/USA/WI-MHDL-2021110495/2021	EPI_ISL_7368696	2021-11-06	North America / USA / Wisconsin / Milwaukee County	Human	Original	Nanopore Clear Dx	BIP-WV6	AY.3	21J	Delta	GK	(N_G215C,N_D63G,N_R203M,NSP12_G671S,NSP6_I162V,NS3_S26L,Spike_A701V,Spike_L5F,Spike_P681R,Spike_R158del,NSP3_P1228L,NS7a_V82A,NSP3_A488S,Spike_F157del,NSP4_T492I,NSP14_A394V,Spike_T19R,NS7a_T120I,N_D377Y,NSP3_S794L,M_I82T,Spike_D950N,NS7b_T40I,NSP3_A1526V,NSP13_P77L,Spike_E156G,NSP3_P1469S,Spike_T478K,NSP6_T77A,NSP12_P323L,Spike_D614G,NSP4_V167L,Spike_L452R)
hCoV-19/USA/WI-MHDL-2021110497/2021	EPI_ISL_7368697	2021-11-06	North America / USA / Wisconsin / Milwaukee County	Human	Original	Nanopore Clear Dx	BIP-WV6	AY.113	21J	Delta	GK	(N_G215C,N_D63G,N_R203M,NSP12_G671S,NSP12_P264S,NS8_V33F,NS3_S26L,NSP15_D91G,Spike_P681R,Spike_R158del,NSP3_P1228L,NSP4_T204I,NS7a_V82A,NSP3_A488S,Spike_F157del,NSP4_T492I,NSP14_A394V,Spike_T19R,NS7a_T120I,NS7a_L12F,N_D377Y,M_I82T,NSP2_E460D,Spike_D950N,NS7b_T40I,NSP13_P77L,Spike_E156G,NSP3_P1469S,Spike_T478K,NSP15_N82S,NSP6_T77A,NSP12_P323L,NSP5_K90R,Spike_D614G,NSP4_V167L,Spike_L452R)
hCoV-19/USA/WI-MHDL-2021110498/2021	EPI_ISL_7368698	2021-11-06	North America / USA / Wisconsin / Milwaukee County	Human	Original	Nanopore Clear Dx	BIP-WV6	AY.120.1	21J	Delta	GK	(N_G215C,N_D63G,N_R203M,NSP12_G671S,NS7a_L56del,NS3_S26L,Spike_P681R,NSP3_S1230F,Spike_R158del,NS7a_T57del,NSP3_P1228L,NS7a_T61del,NS7a_A55del,NS7a_C58del,NS7a_V82A,Spike_F157del,NSP3_A488S,NSP4_T492I,NS7a_F54del,NSP14_A394V,Spike_T19R,NS7a_T120I,N_D377Y,M_I82T,Spike_D950N,NS7b_T40I,NSP13_P77L,NS7a_S60del,Spike_E156G,NSP3_P1469S,NS7a_Q62del,NSP6_T77A,NSP12_P323L,Spike_D614G,NSP4_V167L,NS7a_F59del)
hCoV-19/USA/WI-MHDL-2021110499/2021	EPI_ISL_7368699	2021-11-06	North America / USA / Wisconsin / Milwaukee County	Human	Original	Nanopore Clear Dx	BIP-WV6	AY.103	21J	Delta	GK	(N_G215C,N_D63G,N_R203M,NSP12_G671S,NSP13_I334V,NS3_S26L,Spike_K182I,NSP8_P178H,Spike_P681R,Spike_R158del,NSP3_P1228L,NS7a_V82A,NSP3_A488S,Spike_F157del,NSP4_T492I,NSP14_A394V,Spike_T19R,NS7a_T120I,N_D377Y,M_I82T,Spike_D950N,NS7b_T40I,NSP13_P77L,Spike_E156G,Spike_T478K,NSP6_T77A,NSP12_P323L,Spike_D614G,Spike_L452R,NSP4_V167L)
hCoV-19/USA/WI-MHDL-2021110500/2021	EPI_ISL_7368700	2021-11-06	North America / USA / Wisconsin / Milwaukee County	Human	Original	Nanopore Clear Dx	BIP-WV6	AY.117	21J	Delta	GK	(N_G215C,N_D63G,N_R203M,NSP12_G671S,NSP13_Q518H,NS3_S26L,Spike_P681R,Spike_R158del,NSP3_I335V,NSP3_P1228L,NS7a_V82A,NSP3_A488S,Spike_F157del,NSP4_T492I,NSP13_T214I,NSP14_A394V,Spike_T19R,NS7a_T120I,N_D377Y,M_I82T,M_I201V,Spike_D950N,NS7b_T40I,NSP13_P77L,Spike_E156G,Spike_T604I,NSP3_P1469S,Spike_T478K,NSP2_W466L,NSP6_T77A,NSP2_K335Q,NSP12_P323L,Spike_D614G,NSP4_V167L,Spike_L452R,NSP12_R249M)
hCoV-19/USA/WI-MHDL-2021110503/2021	EPI_ISL_7368701	2021-11-06	North America / USA / Wisconsin / Milwaukee County	Human	Original	Nanopore Clear Dx	BIP-WV6	AY.103	21J	Delta	GK	(N_G215C,N_D63G,NSP2_C177S,N_R203M,NSP12_G671S,NSP13_I334V,NS3_S26L,Spike_P681R,Spike_R158del,NSP3_P1228L,NS7a_V82A,NSP3_A488S,Spike_F157del,NSP4_T492I,NSP14_A394V,Spike_T19R,NS7a_T120I,N_D377Y,M_I82T,Spike_D950N,NS7b_T40I,NSP13_P77L,Spike_E156G,NSP3_P1469S,Spike_T478K,NSP3_N354S,NSP6_T77A,NSP12_P323L,Spike_D614G,NSP4_V167L,Spike_L452R,NSP4_G178S)
hCoV-19/USA/WI-MHDL-2021110504/2021	EPI_ISL_7368702	2021-11-06	North America / USA / Wisconsin / Milwaukee County	Human	Original	Nanopore Clear Dx	BIP-WV6	AY.113	21J	Delta	GK	(N_G215C,N_D63G,N_R203M,NSP12_G671S,NSP12_P264S,NS8_V33F,NS3_S26L,NSP15_D91G,Spike_P681R,Spike_R158del,NSP3_P1228L,NSP4_T204I,NS7a_V82A,NSP3_A488S,Spike_F157del,NSP4_T492I,NSP14_A394V,Spike_T19R,NS7a_T120I,NS7a_L12F,N_D377Y,M_I82T,NSP2_E460D,Spike_D950N,NS7b_T40I,NSP13_P77L,Spike_E156G,NSP3_P1469S,Spike_T478K,NSP15_N82S,NSP6_T77A,NSP12_P323L,NSP5_K90R,Spike_D614G,NSP4_V167L,Spike_L452R)
hCoV-19/USA/WI-MHDL-2021110505/2021	EPI_ISL_7368703	2021-11-06	North America / USA / Wisconsin / Milwaukee County	Human	Original	Nanopore Clear Dx	BIP-WV6	AY.44	21J	Delta	GK	(NS3_V255del,N_G215C,N_D63G,N_R203M,NSP12_G671S,NS3_S26L,NSP12_N491T,Spike_P681R,Spike_R158del,NS7a_A66V,NS7a_A64S,NSP3_P1228L,NS7a_F65Y,NS7a_V82A,NSP3_A488S,Spike_F157del,NSP4_T492I,NSP14_A394V,Spike_T19R,NS7a_T120I,NSP12_F192V,N_D377Y,M_I82T,Spike_D950N,NS7a_F63I,NS7b_T40I,NSP3_A1736V,NSP13_P77L,NS7a_S60N,Spike_E156G,NS7a_C67del,NS7a_Q62S,NSP3_P1469S,Spike_T478K,NSP6_T77A,NS7a_A55V,NSP2_T634I,N…
hCoV-19/USA/WI-MHDL-2021110506/2021	EPI_ISL_7368704	2021-11-06	North America / USA / Wisconsin / Milwaukee County	Human	Original	Nanopore Clear Dx	BIP-WV6	AY.44	21J	Delta	GK	(NS3_V255del,N_G215C,N_D63G,N_R203M,NSP12_G671S,NS3_S26L,NSP12_N491T,Spike_P681R,Spike_R158del,NS7a_A66V,NS7a_A64S,NSP3_P1228L,NS7a_F65Y,NS7a_V82A,NSP3_A488S,Spike_F157del,NSP4_T492I,NSP14_A394V,Spike_T19R,NS7a_T120I,NSP12_F192V,N_D377Y,M_I82T,Spike_D950N,NS7a_F63I,NS7b_T40I,NSP3_A1736V,NSP13_P77L,NS7a_S60N,Spike_E156G,NS7a_C67del,NS7a_Q62S,NSP3_P1469S,Spike_T478K,NSP6_T77A,NS7a_A55V,NSP2_T634I,N…
hCoV-19/USA/WI-MHDL-2021110507/2021	EPI_ISL_7368705	2021-11-06	North America / USA / Wisconsin / Milwaukee County	Human	Original	Nanopore Clear Dx	BIP-WV6	AY.113	21J	Delta	GK	(N_G215C,N_D63G,N_R203M,NSP12_G671S,NSP12_P264S,NS8_V33F,NS3_S26L,NSP15_D91G,Spike_P681R,Spike_R158del,NSP3_P1228L,NSP4_T204I,NS7a_V82A,NSP3_A488S,Spike_F157del,NSP4_T492I,NSP14_A394V,Spike_T19R,NS7a_T120I,NS7a_L12F,N_D377Y,M_I82T,NSP2_E460D,Spike_D950N,NS7b_T40I,NSP13_P77L,Spike_E156G,NSP3_P1469S,Spike_T478K,NSP15_N82S,NSP6_T77A,NSP12_P323L,NSP5_K90R,Spike_D614G,NSP4_V167L,Spike_L452R)
hCoV-19/USA/WI-MHDL-2021110508/2021	EPI_ISL_7368706	2021-11-06	North America / USA / Wisconsin / Milwaukee County	Human	Original	Nanopore Clear Dx	BIP-WV6	AY.113	21J	Delta	GK	(N_G215C,N_D63G,N_R203M,NSP12_G671S,NSP12_P264S,NS8_V33F,NS3_S26L,NSP15_D91G,Spike_P681R,Spike_R158del,NSP3_P1228L,NSP4_T204I,NS7a_V82A,NSP3_A488S,Spike_F157del,NSP4_T492I,NSP14_A394V,Spike_T19R,NS7a_T120I,NS7a_L12F,N_D377Y,M_I82T,NSP2_E460D,Spike_D950N,NS7b_T40I,NSP13_P77L,Spike_E156G,NSP3_P1469S,Spike_T478K,NSP15_N82S,NSP6_T77A,NSP12_P323L,NSP5_K90R,Spike_D614G,NSP4_V167L,Spike_L452R)
hCoV-19/USA/WI-MHDL-2021110443/2021	EPI_ISL_6864924	2021-11-07	North America / USA / Wisconsin / Milwaukee County	Human	Original	Illumina MiSeq	DRAGEN COVID lineage v3.5.4	AY.25	21J	Delta	GK	(N_G215C,N_D63G,N_R203M,NSP12_G671S,NS7a_L56del,Spike_G142D,NS3_S26L,Spike_P681R,Spike_R158del,NS7a_A66V,NS7a_A64S,NSP3_P1228L,NS7a_F65Y,NS7a_A55del,NS7a_V82A,NSP3_A488S,Spike_F157del,NSP4_T492I,NSP5_P108L,NSP14_A394V,Spike_T19R,NS7a_T120I,N_D377Y,M_I82T,Spike_D950N,NS7a_F63I,NS7b_T40I,NSP13_P77L,NS7a_S60N,Spike_E156G,NS7a_C67del,NSP3_E122D,NS7a_Q62S,NSP3_P1469S,Spike_T478K,NSP6_T77A,NS3_E239Q,NS…
hCoV-19/USA/WI-MHDL-2021110444/2021	EPI_ISL_6864925	2021-11-07	North America / USA / Wisconsin / Milwaukee County	Human	Original	Illumina MiSeq	DRAGEN COVID lineage v3.5.4	AY.25	21J	Delta	GK	(N_G215C,N_D63G,N_R203M,NSP12_G671S,NS7a_L56del,Spike_G142D,NS3_S26L,Spike_P681R,Spike_R158del,NS7a_A66V,NS7a_A64S,NSP3_P1228L,NS7a_F65Y,NS7a_A55del,NS7a_V82A,NSP3_A488S,Spike_F157del,NSP4_T492I,NSP5_P108L,NSP14_A394V,Spike_T19R,NS7a_T120I,N_D377Y,M_I82T,Spike_D950N,NS7a_F63I,NS7b_T40I,NSP13_P77L,NS7a_S60N,Spike_E156G,NS7a_C67del,NSP3_E122D,NS7a_Q62S,NSP3_P1469S,Spike_T478K,NSP6_T77A,NS3_E239Q,NS…
hCoV-19/USA/WI-MHDL-2021110445/2021	EPI_ISL_6861955	2021-11-08	North America / USA / Wisconsin / Milwaukee County	Human	Original	Illumina MiSeq	DRAGEN COVID lineage v3.5.4	AY.3	21J	Delta	GK	(N_G215C,N_D63G,N_R203M,Spike_I1221V,NSP12_G671S,NSP6_I162V,Spike_G142D,NS3_S26L,Spike_P681R,Spike_R158del,NSP3_P1228L,NS7a_P48S,NS7a_V82A,NSP3_A488S,Spike_F157del,NSP4_T492I,NSP14_A394V,Spike_T19R,NS7a_T120I,N_D377Y,M_I82T,Spike_D950N,NS7b_T40I,NSP13_P77L,Spike_E156G,NSP3_T656I,NSP3_P1469S,Spike_T478K,NSP6_T77A,NSP12_P323L,Spike_D614G,NSP4_V167L,Spike_L452R)
hCoV-19/USA/WI-MHDL-2021110446/2021	EPI_ISL_6861956	2021-11-08	North America / USA / Wisconsin / Milwaukee County	Human	Original	Illumina MiSeq	DRAGEN COVID lineage v3.5.4	AY.3	21J	Delta	GK	(N_G215C,N_D63G,N_R203M,Spike_I1221V,NSP12_G671S,NSP6_I162V,Spike_G142D,NS3_S26L,Spike_P681R,Spike_R158del,NSP3_P1228L,NS7a_P48S,NS7a_V82A,NSP3_A488S,Spike_F157del,NSP4_T492I,NSP14_A394V,Spike_T19R,NS7a_T120I,N_D377Y,M_I82T,Spike_D950N,NS7b_T40I,NSP13_P77L,Spike_E156G,NSP3_T656I,NSP3_P1469S,Spike_T478K,NSP6_T77A,NSP12_P323L,Spike_D614G,NSP4_V167L,Spike_L452R)
hCoV-19/USA/WI-MHDL-2021110447/2021	EPI_ISL_6861957	2021-11-08	North America / USA / Wisconsin / Milwaukee County	Human	Original	Illumina MiSeq	DRAGEN COVID lineage v3.5.4	AY.100	21J	Delta	GK	(N_G215C,Spike_T95I,N_D63G,N_R203M,NSP12_G671S,Spike_G142D,Spike_P82T,NS3_S26L,NSP16_K277E,NSP13_A296S,Spike_P681R,Spike_R158del,NSP3_P1228L,NS7a_V82A,NSP3_A488S,Spike_F157del,NSP4_T492I,NSP14_A394V,Spike_T19R,NS7a_T120I,N_D377Y,M_I82T,Spike_D950N,NS7b_T40I,NSP13_P77L,Spike_E156G,NSP10_T102I,NSP2_P568L,NSP3_P1469S,NS8_Y31F,Spike_T478K,NSP6_T77A,NSP12_P323L,Spike_D614G,NSP4_V167L,Spike_L452R)
hCoV-19/USA/WI-MHDL-2021110448/2021	EPI_ISL_6861958	2021-11-08	North America / USA / Wisconsin / Milwaukee County	Human	Original	Illumina MiSeq	DRAGEN COVID lineage v3.5.4	AY.120.1	21J	Delta	GK	(N_G215C,Spike_T95I,N_D63G,N_R203M,NSP12_G671S,Spike_G142D,NS3_I169V,NS3_S26L,NSP3_P340L,Spike_P681R,NSP3_S1230F,Spike_R158del,NSP3_P1228L,NS7a_V82A,NSP3_A488S,Spike_F157del,NSP4_T492I,NSP14_A394V,Spike_T19R,NS7a_T120I,M_I82T,Spike_D950N,NS3_Y109H,NS7b_T40I,NSP13_P77L,Spike_E156G,NSP3_P1469S,Spike_T478K,NSP6_T77A,NSP12_P323L,Spike_D614G,NSP4_V167L,Spike_L452R)
hCoV-19/USA/WI-MHDL-2021110451/2021	EPI_ISL_6861961	2021-11-08	North America / USA / Wisconsin / Milwaukee County	Human	Original	Illumina MiSeq	DRAGEN COVID lineage v3.5.4	AY.119	21J	Delta	GK	(N_G215C,Spike_P809S,Spike_T95I,N_D63G,N_R203M,NSP12_G671S,Spike_G142D,NSP13_T481M,NS3_S26L,Spike_P681R,Spike_R158del,NSP3_P1228L,NSP9_T24I,NS7a_V82A,NSP3_A488S,Spike_F157del,NSP4_T492I,NSP14_A394V,Spike_T19R,NS7a_T120I,N_D377Y,M_I82T,Spike_D950N,NS7a_P45del,NS7b_T40I,NSP13_P77L,NSP14_A323S,Spike_E156G,NSP3_P1469S,NSP4_A92V,Spike_T478K,NSP6_T77A,NSP12_P323L,Spike_D614G,NSP4_V167L,Spike_L452R)
hCoV-19/USA/WI-MHDL-2021120061/2021	EPI_ISL_7809422	2021-11-08	North America / USA / Wisconsin / Milwaukee County	Human	Original	Illumina MiSeq	DRAGEN COVID lineage v3.5.4	AY.44	21J	Delta	GK	(N_G215C,NS8_L60F,N_R203M,NSP12_G671S,NS3_S26L,Spike_P681R,Spike_R158del,NSP3_P1228L,NSP14_V125I,NSP3_A488S,Spike_F157del,NSP4_T492I,NSP14_A394V,Spike_T19R,NSP12_F192V,N_D377Y,NSP13_H164Y,M_I82T,Spike_D950N,NS7b_T40I,NSP3_A1736V,NSP13_P77L,Spike_E156G,NSP3_H1307Y,NSP3_P1469S,Spike_T478K,NSP6_T77A,N_D63S,NSP12_P323L,Spike_D614G,NSP4_V167L,Spike_L452R)
hCoV-19/USA/WI-MHDL-2021120064/2021	EPI_ISL_7809423	2021-11-08	North America / USA / Wisconsin / Milwaukee County	Human	Original	Illumina MiSeq	DRAGEN COVID lineage v3.5.4	AY.117	21J	Delta	GK	(N_G215C,N_D63G,N_R203M,NSP12_G671S,NSP13_Q518H,NS3_S26L,Spike_P681R,Spike_R158del,NSP3_I335V,NSP3_P1228L,NSP3_A488S,Spike_F157del,NSP4_T492I,NSP13_T214I,NSP14_A394V,Spike_T19R,NS7a_T120I,N_D377Y,M_I82T,M_I201V,Spike_D950N,NS7b_T40I,NSP13_P77L,Spike_E156G,Spike_T604I,NS3_R134L,NSP3_P1469S,Spike_T478K,NSP2_W466L,NSP6_T77A,NSP2_K335Q,NSP12_P323L,Spike_D614G,NSP4_V167L,Spike_L452R,NSP12_R249M)
hCoV-19/USA/WI-MHDL-2021120065/2021	EPI_ISL_7809424	2021-11-08	North America / USA / Wisconsin / Milwaukee County	Human	Original	Illumina MiSeq	DRAGEN COVID lineage v3.5.4	AY.103	21J	Delta	GK	(N_G215C,N_D63G,N_R203M,NSP12_G671S,NSP13_I334V,NS3_S26L,Spike_P681R,Spike_R158del,NS8_C25Y,NSP3_P1228L,NSP3_A488S,Spike_F157del,NSP4_T492I,NSP14_A394V,Spike_T19R,N_D377Y,M_I82T,Spike_D950N,NS7b_T40I,NSP13_P77L,Spike_E156G,NSP15_K316R,Spike_T632I,NSP3_P1469S,Spike_T478K,NSP6_T77A,NSP12_P323L,Spike_D614G,NSP4_V167L,Spike_L452R)
hCoV-19/USA/WI-MHDL-2021120066/2021	EPI_ISL_7809425	2021-11-08	North America / USA / Wisconsin / Milwaukee County	Human	Original	Illumina MiSeq	DRAGEN COVID lineage v3.5.4	AY.103	21J	Delta	GK	(N_G215C,N_D63G,N_R203M,NSP8_T145I,NSP12_G671S,NSP13_I334V,NS3_S26L,Spike_P681R,Spike_R158del,NSP3_P1228L,NSP3_A488S,Spike_F157del,NSP4_T492I,NSP14_A394V,Spike_T19R,M_I82T,Spike_D950N,NS7b_T40I,NSP13_P77L,Spike_E156G,NSP3_P1469S,Spike_T478K,NSP7_D44A,NSP6_T77A,NSP12_P323L,Spike_D614G,NSP4_V167L,Spike_L452R,Spike_G181R)
hCoV-19/USA/WI-MHDL-2021120067/2021	EPI_ISL_7809426	2021-11-08	North America / USA / Wisconsin / Milwaukee County	Human	Original	Illumina MiSeq	DRAGEN COVID lineage v3.5.4	AY.44	21J	Delta	GK	(N_G215C,NS8_L60F,N_D63G,N_R203M,NSP12_G671S,NS3_S26L,Spike_P681R,Spike_R158del,NSP3_P1228L,NS7a_V82A,NSP3_A488S,Spike_F157del,NSP4_T492I,NSP14_A394V,Spike_T19R,NS7a_T120I,NSP12_F192V,N_D377Y,NSP2_A476V,NSP13_H164Y,M_I82T,Spike_D950N,NS7b_T40I,NSP3_A1736V,NSP13_P77L,Spike_E156G,NSP3_H1307Y,NSP3_P1469S,Spike_T478K,NSP6_T77A,NSP12_P323L,Spike_D614G,NSP4_V167L,Spike_L452R)
hCoV-19/USA/WI-MHDL-2021120068/2021	EPI_ISL_7809427	2021-11-08	North America / USA / Wisconsin / Milwaukee County	Human	Original	Illumina MiSeq	DRAGEN COVID lineage v3.5.4	AY.103	21J	Delta	GK	(N_G215C,N_D63G,N_R203M,NSP12_G671S,NSP13_I334V,Spike_G142D,NS3_V77F,NS3_S26L,Spike_P681R,Spike_R158del,NSP3_P1228L,NSP3_A488S,Spike_F157del,NSP4_T492I,NSP14_A394V,Spike_T19R,N_D377Y,NSP3_S794L,M_I82T,Spike_D950N,NS7b_T40I,NSP13_P77L,Spike_E156G,NSP3_P1469S,Spike_T478K,NSP6_T77A,NSP12_P323L,Spike_D614G,NSP4_V167L,Spike_L452R)
hCoV-19/USA/WI-MHDL-2021120069/2021	EPI_ISL_7809428	2021-11-08	North America / USA / Wisconsin / Milwaukee County	Human	Original	Illumina MiSeq	DRAGEN COVID lineage v3.5.4	AY.103	21J	Delta	GK	(N_G215C,N_D63G,N_A208S,N_R203M,NSP12_G671S,NSP13_I334V,NS3_P104S,NS3_S26L,Spike_P681R,Spike_R158del,NSP3_P1228L,NS7a_V82A,NSP3_A488S,Spike_F157del,NSP4_T492I,NSP14_A394V,Spike_T19R,N_D377Y,M_I82T,Spike_D950N,NS7b_T40I,NSP13_P77L,Spike_E156G,NSP3_P1469S,Spike_T478K,NSP6_T77A,NSP12_P323L,Spike_D614G,Spike_L452R,NSP4_V167L)
hCoV-19/USA/WI-MHDL-2021120070/2021	EPI_ISL_7809429	2021-11-08	North America / USA / Wisconsin / Milwaukee County	Human	Original	Illumina MiSeq	DRAGEN COVID lineage v3.5.4	AY.103	21J	Delta	GK	(N_G215C,N_D63G,NSP2_C177S,N_R203M,NSP12_G671S,NSP13_I334V,NSP4_L15F,NS3_S26L,Spike_L5F,Spike_P681R,Spike_R158del,NSP3_P1228L,NSP3_A488S,Spike_F157del,NSP4_T492I,NSP14_A394V,Spike_T19R,N_D377Y,M_I82T,Spike_D950N,NS7b_T40I,NSP13_P77L,Spike_E156G,NSP3_P1469S,Spike_T478K,NSP3_N354S,NSP6_T77A,NSP12_P323L,Spike_D614G,NSP4_V167L,Spike_L452R,NSP4_G178S)
hCoV-19/USA/WI-MHDL-2021120071/2021	EPI_ISL_7809430	2021-11-08	North America / USA / Wisconsin / Milwaukee County	Human	Original	Illumina MiSeq	DRAGEN COVID lineage v3.5.4	AY.103	21J	Delta	GK	(N_G215C,N_D63G,N_R203M,NSP12_G671S,NSP13_I334V,NS7a_P34S,Spike_G142D,NS3_S26L,NSP8_P178H,Spike_P681R,Spike_R158del,NSP3_P1228L,NS7a_V82A,NSP3_A488S,Spike_F157del,NSP4_T492I,NSP14_A394V,Spike_T19R,NS7a_T120I,Spike_D138H,N_D377Y,M_I82T,Spike_D950N,NS7b_T40I,NSP13_P77L,Spike_E156G,NSP3_P1469S,Spike_T478K,NSP6_T77A,NSP12_P323L,Spike_D614G,NSP4_V167L,Spike_L452R)
hCoV-19/USA/WI-MHDL-2021120074/2021	EPI_ISL_7809431	2021-11-08	North America / USA / Wisconsin / Milwaukee County	Human	Original	Illumina MiSeq	DRAGEN COVID lineage v3.5.4	AY.103	21J	Delta	GK	(N_G215C,N_D63G,N_R203M,NSP8_T145I,NSP12_G671S,NSP13_I334V,NS3_S26L,Spike_P681R,Spike_R158del,NSP3_P1228L,NSP3_A488S,Spike_F157del,NSP4_T492I,NSP14_A394V,Spike_T19R,NS7a_T120I,N_D377Y,M_I82T,Spike_D950N,NS7b_T40I,NSP13_P77L,Spike_E156G,NSP3_P1469S,Spike_T478K,NSP7_D44A,NSP6_T77A,NSP12_P323L,Spike_D614G,NSP4_V167L,Spike_L452R,Spike_G181R)
hCoV-19/USA/WI-MHDL-2021120075/2021	EPI_ISL_7809432	2021-11-08	North America / USA / Wisconsin / Milwaukee County	Human	Original	Illumina MiSeq	DRAGEN COVID lineage v3.5.4	AY.103	21J	Delta	GK	(N_G215C,N_D63G,N_R203M,NSP12_G671S,NSP13_I334V,NS3_S26L,NSP8_P178H,Spike_P681R,Spike_R158del,NSP3_P1228L,NSP3_A488S,Spike_F157del,NSP4_T492I,NSP14_A394V,Spike_T19R,N_D377Y,M_I82T,Spike_D950N,N_T198I,NS7b_T40I,NSP13_P77L,Spike_E156G,Spike_T547I,NSP3_P1469S,Spike_T478K,NSP6_T77A,NSP12_P323L,Spike_D614G,NSP4_V167L,NSP12_V473F,Spike_L452R)
hCoV-19/USA/WI-MHDL-2021120076/2021	EPI_ISL_7809433	2021-11-08	North America / USA / Wisconsin / Milwaukee County	Human	Original	Illumina MiSeq	DRAGEN COVID lineage v3.5.4	AY.103	21J	Delta	GK	(N_G215C,N_D63G,N_R203M,NSP16_A188S,NSP12_G671S,NSP13_I334V,NS3_S26L,NSP1_V28A,Spike_P681R,Spike_R158del,NSP3_P1228L,NS7a_V82A,NSP3_A488S,Spike_F157del,NSP4_T492I,NSP14_A394V,Spike_T19R,NS7a_T120I,N_D377Y,M_I82T,Spike_D950N,NS7b_T40I,NSP13_P77L,Spike_E156G,NSP3_P1469S,Spike_T478K,NSP6_T77A,NSP12_P323L,Spike_D614G,NSP4_V167L,Spike_L452R)
hCoV-19/USA/WI-MHDL-2021120077/2021	EPI_ISL_7809434	2021-11-08	North America / USA / Wisconsin / Milwaukee County	Human	Original	Illumina MiSeq	DRAGEN COVID lineage v3.5.4	AY.103	21J	Delta	GK	(N_G215C,N_D63G,N_R203M,NSP8_T145I,NSP12_G671S,NSP13_I334V,Spike_G142D,NS3_S26L,Spike_P681R,Spike_R158del,NSP3_P1228L,NS7a_V82A,NSP3_A488S,Spike_F157del,NSP4_T492I,NSP14_A394V,Spike_T19R,NS7a_T120I,N_D377Y,M_I82T,Spike_D950N,NS7b_T40I,NSP13_P77L,Spike_E156G,NSP3_P1469S,Spike_T478K,NSP7_D44A,NSP6_T77A,NSP12_P323L,Spike_D614G,NSP4_V167L,Spike_L452R,Spike_G181R)
hCoV-19/USA/WI-MHDL-2021120078/2021	EPI_ISL_7809435	2021-11-08	North America / USA / Wisconsin / Milwaukee County	Human	Original	Illumina MiSeq	DRAGEN COVID lineage v3.5.4	AY.44	21J	Delta	GK	(N_G215C,NSP3_S377G,NS8_L60F,N_D63G,N_R203M,NSP3_A880V,NSP12_G671S,Spike_G142D,NS3_I232V,NS3_S26L,Spike_P681R,Spike_R158del,NSP3_P1228L,NSP3_F961L,NS7a_V82A,NSP3_A488S,Spike_F157del,NSP4_T492I,NSP14_A394V,Spike_T19R,NSP12_F192V,N_D377Y,NSP13_H164Y,M_I82T,Spike_D950N,NS7b_T40I,NSP3_A1736V,NSP13_P77L,Spike_E156G,NSP3_H1307Y,NSP3_P1469S,Spike_T478K,NSP6_T77A,NSP12_P323L,Spike_D614G,NSP4_V167L,Spike_…
hCoV-19/USA/WI-MHDL-2021120079/2021	EPI_ISL_7809436	2021-11-08	North America / USA / Wisconsin / Milwaukee County	Human	Original	Illumina MiSeq	DRAGEN COVID lineage v3.5.4	AY.44	21J	Delta	GK	(N_G215C,NS8_L60F,N_R203M,NSP12_G671S,Spike_G142D,NS3_S26L,Spike_L5F,Spike_P681R,Spike_R158del,N_P67L,NSP3_P1228L,NSP14_V125I,NS7a_V82A,NSP3_A488S,Spike_F157del,NSP4_T492I,NSP14_A394V,Spike_T19R,NS7a_T120I,NSP12_F192V,N_D377Y,NSP13_H164Y,M_I82T,Spike_D950N,NS7b_T40I,NSP3_A1736V,NSP13_P77L,Spike_E156G,NSP3_H1307Y,NSP10_T102I,NSP3_P1469S,Spike_T478K,NSP6_T77A,N_D63S,NSP12_P323L,Spike_D614G,NSP4_V16…
hCoV-19/USA/WI-MHDL-2021120080/2021	EPI_ISL_7809437	2021-11-08	North America / USA / Wisconsin / Milwaukee County	Human	Original	Illumina MiSeq	DRAGEN COVID lineage v3.5.4	AY.119	21J	Delta	GK	(N_G215C,Spike_T95I,N_D63G,N_R203M,NSP12_G671S,Spike_G142D,NS3_S26L,Spike_P681R,Spike_R158del,NSP3_P1228L,NS7a_V82A,NSP3_A488S,NSP12_W216F,Spike_F157del,NSP4_T492I,NSP14_A394V,Spike_T19R,NS7a_T120I,N_D377Y,M_I82T,Spike_D950N,NS7b_T40I,NSP13_P77L,NSP14_A323S,Spike_E156G,NSP3_P1469S,NSP4_A92V,Spike_T478K,NSP6_T77A,NSP12_P323L,Spike_D614G,NSP4_V167L,NSP6_L37F,Spike_L452R)
hCoV-19/USA/WI-MHDL-2021120081/2021	EPI_ISL_7809438	2021-11-08	North America / USA / Wisconsin / Milwaukee County	Human	Original	Illumina MiSeq	DRAGEN COVID lineage v3.5.4	AY.118	21J	Delta	GK	(N_G215C,N_D63G,NS8_G77C,N_R203M,NSP12_G671S,NSP14_V182L,NS3_S26L,Spike_P681R,Spike_R158del,NSP3_P1228L,M_A2V,NSP3_A488S,Spike_F157del,NS6_E46V,NSP4_T492I,NSP14_A394V,Spike_T19R,N_D377Y,M_I82T,N_P142S,Spike_D950N,NS7b_T40I,NSP13_P77L,Spike_E156G,NSP3_P1469S,Spike_T478K,NSP12_L638F,NSP6_T77A,NSP12_P323L,Spike_D614G,NSP4_V167L,Spike_L452R)
hCoV-19/USA/WI-MHDL-2021120083/2021	EPI_ISL_7809439	2021-11-08	North America / USA / Wisconsin / Milwaukee County	Human	Original	Illumina MiSeq	DRAGEN COVID lineage v3.5.4	AY.103	21J	Delta	GK	(N_G215C,N_D63G,N_R203M,NSP12_G671S,NSP13_I334V,NS7a_P34S,Spike_G142D,NS3_S26L,NSP8_P178H,Spike_P681R,Spike_R158del,NSP3_P1228L,NSP3_A488S,Spike_F157del,NSP4_T492I,NSP14_A394V,Spike_T19R,Spike_D138H,N_D377Y,M_I82T,Spike_D950N,NS7b_T40I,NSP13_P77L,Spike_E156G,NSP3_P1469S,Spike_T478K,NSP6_T77A,NSP12_P323L,Spike_D614G,NSP4_V167L,Spike_L452R)
hCoV-19/USA/WI-MHDL-2021120084/2021	EPI_ISL_7809440	2021-11-08	North America / USA / Wisconsin / Milwaukee County	Human	Original	Illumina MiSeq	DRAGEN COVID lineage v3.5.4	AY.117	21J	Delta	GK	(N_G215C,Spike_T95I,N_D63G,N_R203M,NSP12_G671S,NSP13_Q518H,Spike_G142D,NS3_S26L,Spike_P681R,Spike_R158del,NSP3_I335V,NSP3_P1228L,NSP3_A488S,Spike_F157del,NSP4_T492I,NSP13_T214I,NSP14_A394V,Spike_T19R,NS7a_T120I,N_D377Y,M_I82T,M_I201V,Spike_D950N,NS7b_T40I,NSP13_P77L,Spike_E156G,Spike_T604I,NS3_R134L,NSP3_P1469S,Spike_T478K,NSP2_W466L,NSP6_T77A,NSP2_K335Q,NSP12_P323L,Spike_D614G,NSP4_V167L,Spike_L…
hCoV-19/USA/WI-MHDL-2021120085/2021	EPI_ISL_7809441	2021-11-08	North America / USA / Wisconsin / Milwaukee County	Human	Original	Illumina MiSeq	DRAGEN COVID lineage v3.5.4	AY.3	21J	Delta	GK	(N_G215C,N_D63G,N_R203M,NS3_ins104P,E_V58F,NSP12_G671S,NS3_D210A,NSP6_I162V,NS3_S26L,Spike_P681R,Spike_R158del,NSP3_P1228L,NSP3_A488S,Spike_F157del,NSP4_T492I,NSP14_A394V,Spike_T19R,NS7a_T120I,Spike_V70I,N_D377Y,M_I82T,Spike_D950N,NS7b_T40I,NSP13_P77L,Spike_E156G,NSP3_P1469S,Spike_T478K,NSP6_T77A,N_G34W,NSP12_P323L,Spike_D614G,NSP4_V167L,Spike_L452R)
hCoV-19/USA/WI-MHDL-2021120086/2021	EPI_ISL_7809442	2021-11-08	North America / USA / Wisconsin / Walworth County	Human	Original	Illumina MiSeq	DRAGEN COVID lineage v3.5.4	AY.3	21J	Delta	GK	(N_G215C,N_D63G,N_R203M,NS8_ins107F,NSP12_G671S,NSP6_I162V,Spike_G142D,NS3_S26L,NSP3_M102I,Spike_P681R,Spike_R158del,NSP3_P1228L,NSP3_A488S,Spike_F157del,NSP4_T492I,NSP14_A394V,Spike_T19R,N_D377Y,M_I82T,Spike_D950N,NS7b_T40I,NSP3_T749I,NSP13_P77L,Spike_E156G,NSP3_P1469S,Spike_T478K,NSP6_T77A,NSP12_P323L,Spike_D614G,NSP4_V167L,Spike_L452R)
hCoV-19/USA/WI-MHDL-2021120087/2021	EPI_ISL_7809443	2021-11-08	North America / USA / Wisconsin / Walworth County	Human	Original	Illumina MiSeq	DRAGEN COVID lineage v3.5.4	AY.3	21J	Delta	GK	(N_G215C,N_D63G,N_R203M,NS8_ins107F,NSP12_G671S,NSP6_I162V,NS3_S26L,NSP3_M102I,Spike_P681R,Spike_R158del,NSP3_P1228L,NSP3_A488S,Spike_F157del,NSP4_T492I,NSP14_A394V,Spike_T19R,N_D377Y,M_I82T,Spike_D950N,NS7b_T40I,NSP3_T749I,NSP13_P77L,Spike_E156G,NSP3_P1469S,Spike_T478K,NSP6_T77A,NSP12_P323L,Spike_D614G,NSP4_V167L,Spike_L452R)
hCoV-19/USA/WI-MHDL-2021120094/2021	EPI_ISL_7809450	2021-11-08	North America / USA / Wisconsin / Waukesha County	Human	Original	Illumina MiSeq	DRAGEN COVID lineage v3.5.4	AY.103	21J	Delta	GK	(N_G215C,N_D63G,N_R203M,NSP12_G671S,NSP13_I334V,Spike_G142D,NS3_S26L,Spike_P681R,Spike_R158del,NSP3_P1228L,NS7a_V82A,NSP3_A488S,Spike_F157del,NSP4_T492I,NSP14_A394V,Spike_T19R,NS7a_T120I,N_D377Y,M_I82T,Spike_D950N,NS7b_T40I,NSP13_P77L,Spike_E156G,NSP3_P1469S,Spike_T478K,NSP6_T77A,NSP12_P323L,Spike_D614G,Spike_L452R,NSP4_V167L)
hCoV-19/USA/WI-MHDL-2021120095/2021	EPI_ISL_7809451	2021-11-08	North America / USA / Wisconsin / Milwaukee County	Human	Original	Illumina MiSeq	DRAGEN COVID lineage v3.5.4	AY.120.1	21J	Delta	GK	(N_G215C,Spike_T95I,N_D63G,N_R203M,NSP12_G671S,NS7a_L56del,Spike_G142D,NS3_S26L,Spike_P681R,NSP3_S1230F,Spike_R158del,NS7a_T57del,NSP3_P1228L,NS7a_T61del,NS7a_A55del,NS7a_C58del,NS7a_V82A,NSP3_A488S,Spike_F157del,NSP4_T492I,NS7a_F54del,NSP14_A394V,Spike_T19R,NS7a_T120I,N_D377Y,M_I82T,Spike_D950N,NS7b_T40I,NSP13_P77L,NS7a_S60del,Spike_E156G,NSP3_P1469S,Spike_T478K,NS7a_Q62del,NSP6_T77A,NSP12_P323L…
hCoV-19/USA/WI-MHDL-2021120096/2021	EPI_ISL_7809452	2021-11-08	North America / USA / Wisconsin / Milwaukee County	Human	Original	Illumina MiSeq	DRAGEN COVID lineage v3.5.4	AY.103	21J	Delta	GK	(N_G215C,N_D63G,N_A208S,N_R203M,NSP12_G671S,NSP13_I334V,Spike_G142D,NSP2_D114A,NS3_P104S,NS3_S26L,Spike_P681R,Spike_R158del,NSP3_P1228L,NS7a_V82A,NSP3_A488S,Spike_F157del,NSP4_T492I,NSP14_A394V,Spike_T19R,NS7a_T120I,N_D377Y,M_I82T,Spike_D950N,NS7b_T40I,NSP13_P77L,Spike_E156G,NSP3_P1469S,Spike_T478K,NSP6_T77A,NSP12_P323L,Spike_D614G,NSP4_V167L,Spike_L452R)
hCoV-19/USA/WI-MHDL-2021120097/2021	EPI_ISL_7809453	2021-11-08	North America / USA / Wisconsin / Racine County	Human	Original	Illumina MiSeq	DRAGEN COVID lineage v3.5.4	AY.103	21J	Delta	GK	(N_G215C,N_D63G,N_R203M,NSP12_G671S,NSP3_N1934T,NSP13_I334V,Spike_G142D,NS3_S26L,Spike_P681R,Spike_R158del,NSP3_P1228L,NSP12_D358A,NS7a_R78C,NS7a_V82A,NSP3_A488S,Spike_F157del,NSP4_T492I,NSP14_A394V,Spike_T19R,NS7a_T120I,N_D377Y,M_I82T,Spike_D950N,NS7b_T40I,NSP13_P77L,Spike_E156G,NSP3_P1469S,Spike_T478K,NSP6_T77A,NSP9_T77I,NSP12_P323L,Spike_D614G,NSP4_V167L,Spike_L452R)
hCoV-19/USA/WI-MHDL-2021120098/2021	EPI_ISL_7809454	2021-11-08	North America / USA / Wisconsin / Waukesha County	Human	Original	Illumina MiSeq	DRAGEN COVID lineage v3.5.4	AY.25	21J	Delta	GK	(N_G215C,N_D63G,N_R203M,NSP12_G671S,NS3_S26L,Spike_P681R,Spike_R158del,NSP3_P1228L,NS7a_V82A,NSP3_A488S,Spike_F157del,NSP4_T492I,NSP14_A394V,Spike_T19R,N_D377Y,M_I82T,Spike_D950N,NS7b_T40I,NSP13_P77L,Spike_E156G,NSP3_P1469S,Spike_T478K,NSP6_T77A,NS3_E239Q,NSP9_R39K,NSP12_P323L,Spike_D614G,NS3_E181V,NSP4_V167L,Spike_L452R,NSP3_A534V)
hCoV-19/USA/WI-MHDL-2021120100/2021	EPI_ISL_7809455	2021-11-08	North America / USA / Wisconsin / Waukesha County	Human	Original	Illumina MiSeq	DRAGEN COVID lineage v3.5.4	AY.103	21J	Delta	GK	(N_G215C,N_D63G,N_R203M,NSP12_G671S,NSP13_I334V,Spike_G142D,NS3_S26L,Spike_P681R,Spike_R158del,NSP3_P1228L,NS7a_V82A,NSP3_A488S,Spike_F157del,NSP4_T492I,NSP14_A394V,Spike_T19R,NS7a_T120I,N_D377Y,M_I82T,Spike_D950N,NS7b_T40I,NSP13_P77L,Spike_E156G,NSP3_P1469S,Spike_T478K,NSP6_T77A,NSP12_P323L,Spike_D614G,Spike_L452R,NSP4_V167L)
hCoV-19/USA/WI-MHDL-2021120101/2021	EPI_ISL_7809456	2021-11-08	North America / USA / Wisconsin / Waukesha County	Human	Original	Illumina MiSeq	DRAGEN COVID lineage v3.5.4	AY.103	21J	Delta	GK	(N_G215C,N_D63G,N_R203M,NSP12_G671S,NSP13_I334V,Spike_D979Y,Spike_G142D,NS3_L53F,NS3_P25L,NS3_S26L,Spike_P681R,NSP3_E427D,Spike_R158del,NSP3_P1228L,NS7a_R78C,NS7a_V82A,Spike_F157del,NSP3_A488S,NSP4_T492I,NSP14_A394V,Spike_T19R,NS7a_T120I,N_D377Y,M_I82T,Spike_D950N,NS7b_T40I,NSP13_P77L,Spike_E156G,NSP3_P1469S,Spike_T478K,NSP13_G118C,NSP6_T77A,Spike_A1020S,NSP12_P323L,Spike_D614G,NSP4_V167L,Spike_L…
hCoV-19/USA/WI-MHDL-2021120102/2021	EPI_ISL_7809457	2021-11-08	North America / USA / Wisconsin / Waukesha County	Human	Original	Illumina MiSeq	DRAGEN COVID lineage v3.5.4	AY.103	21J	Delta	GK	(N_G215C,N_D63G,N_R203M,NSP12_G671S,NSP13_I334V,Spike_D979Y,Spike_G142D,NS3_L53F,NS3_P25L,NS3_S26L,Spike_P681R,NSP3_E427D,Spike_R158del,NSP3_P1228L,NS7a_R78C,NS7a_V82A,Spike_F157del,NSP3_A488S,NSP4_T492I,NSP14_A394V,Spike_T19R,NS7a_T120I,N_D377Y,M_I82T,Spike_D950N,NS7b_T40I,NSP13_P77L,Spike_E156G,Spike_T478K,NSP13_G118C,NSP6_T77A,Spike_A1020S,NSP12_P323L,Spike_D614G,NSP4_V167L,Spike_L452R,Spike_H…
hCoV-19/USA/WI-MHDL-2021120103/2021	EPI_ISL_7809458	2021-11-08	North America / USA / Wisconsin / Milwaukee County	Human	Original	Illumina MiSeq	DRAGEN COVID lineage v3.5.4	AY.103	21J	Delta	GK	(N_G215C,N_D63G,N_R203M,NSP12_G671S,NSP13_I334V,NS3_S26L,Spike_P681R,Spike_R158del,NSP3_P1228L,NS7a_V82A,NSP3_A488S,Spike_F157del,NSP4_T492I,NSP14_A394V,Spike_T19R,NS7a_T120I,N_D377Y,M_I82T,Spike_D950N,NS7b_T40I,NSP13_P77L,Spike_E156G,NSP3_P1469S,Spike_T478K,NSP6_T77A,NSP14_S369F,NSP12_P323L,Spike_D614G,Spike_L452R,NSP4_V167L)
hCoV-19/USA/WI-MHDL-2021120104/2021	EPI_ISL_7809459	2021-11-08	North America / USA / Wisconsin / Milwaukee County	Human	Original	Illumina MiSeq	DRAGEN COVID lineage v3.5.4	AY.103	21J	Delta	GK	(N_G215C,N_D63G,N_R203M,NSP12_G671S,NSP13_I334V,Spike_G142D,NS3_S26L,Spike_P681R,Spike_R158del,NSP3_P1228L,NS7a_V82A,NSP3_A488S,Spike_F157del,NSP4_T492I,NSP14_A394V,Spike_T19R,NS7a_T120I,NSP3_N1177H,N_D377Y,M_I82T,Spike_D950N,NS7b_T40I,NSP13_P77L,Spike_E156G,NSP3_P1469S,Spike_T478K,NSP6_T77A,NSP14_S369F,NSP12_P323L,Spike_D614G,NSP4_V167L,Spike_L452R)
hCoV-19/USA/WI-MHDL-2021120105/2021	EPI_ISL_7809460	2021-11-08	North America / USA / Wisconsin / Waukesha County	Human	Original	Illumina MiSeq	DRAGEN COVID lineage v3.5.4	AY.103	21J	Delta	GK	(N_G215C,N_D63G,N_R203M,NSP12_G671S,NSP13_I334V,Spike_G142D,NS3_S26L,Spike_P681R,Spike_R158del,NSP3_P1228L,NS7a_V82A,NSP3_A488S,Spike_F157del,NSP4_T492I,NSP14_A394V,Spike_T19R,NS7a_T120I,N_D377Y,M_I82T,Spike_D950N,NS7b_T40I,NSP13_P77L,Spike_E156G,NSP3_P1469S,Spike_T478K,NSP6_T77A,NSP12_P323L,Spike_D614G,Spike_L452R,NSP4_V167L)
hCoV-19/USA/WI-MHDL-2021120106/2021	EPI_ISL_7809461	2021-11-08	North America / USA / Wisconsin / Waukesha County	Human	Original	Illumina MiSeq	DRAGEN COVID lineage v3.5.4	AY.103	21J	Delta	GK	(N_G215C,N_D63G,N_R203M,NSP12_G671S,NSP13_I334V,NS3_S26L,Spike_P681R,Spike_R158del,NSP3_P1228L,NS7a_V82A,NSP3_A488S,Spike_F157del,NSP4_T492I,NSP14_A394V,Spike_T19R,NS7a_T120I,N_D377Y,M_I82T,Spike_D950N,NS7b_T40I,NSP13_P77L,Spike_E156G,NSP3_P1469S,Spike_T478K,NSP6_T77A,NSP14_S369F,NSP12_P323L,Spike_D614G,Spike_L452R,NSP4_V167L)
hCoV-19/USA/WI-MHDL-2021120108/2021	EPI_ISL_7809462	2021-11-08	North America / USA / Wisconsin / Waukesha County	Human	Original	Illumina MiSeq	DRAGEN COVID lineage v3.5.4	AY.103	21J	Delta	GK	(NS8_P30R,N_G215C,N_D63G,N_R203M,NSP12_G671S,NSP13_I334V,NS3_S26L,Spike_P681R,Spike_R158del,NSP3_P1228L,NS7a_V82A,NSP3_A488S,Spike_F157del,NSP4_T492I,NSP14_A394V,Spike_T19R,NS7a_T120I,N_D377Y,M_I82T,Spike_D950N,NS7b_T40I,NSP13_P77L,Spike_E156G,NSP3_P1469S,Spike_T478K,NSP6_T77A,NSP12_P323L,Spike_D614G,Spike_L452R,NSP4_V167L)
hCoV-19/USA/WI-MHDL-2021120109/2021	EPI_ISL_7809463	2021-11-08	North America / USA / Wisconsin / Waukesha County	Human	Original	Illumina MiSeq	DRAGEN COVID lineage v3.5.4	AY.4	21J	Delta	GK	(N_G215C,NSP3_A1711V,Spike_T95I,N_D63G,NSP12_N743K,N_R203M,NSP7_M3I,NSP12_G671S,NSP4_A231V,NS3_S26L,Spike_P681R,Spike_R158del,NSP3_P1228L,NS3_L219F,NSP3_A488S,Spike_F157del,NSP4_T492I,NSP14_A394V,Spike_T19R,N_D377Y,M_I82T,Spike_D950N,NS7b_T40I,NSP13_P77L,Spike_E156G,NS3_G49C,NSP3_P1469S,Spike_T478K,NSP6_T77A,NSP12_P323L,Spike_D614G,NSP4_V167L,Spike_L452R,NSP2_P91L)
hCoV-19/USA/WI-MHDL-2021120110/2021	EPI_ISL_7809464	2021-11-08	North America / USA / Wisconsin / Ozaukee County	Human	Original	Illumina MiSeq	DRAGEN COVID lineage v3.5.4	AY.25	21J	Delta	GK	(N_G215C,N_D63G,N_R203M,NSP12_G671S,NS3_S26L,Spike_P681R,Spike_R158del,NSP3_P1228L,NSP3_A488S,Spike_F157del,NSP4_T492I,NSP14_A394V,Spike_T19R,N_D377Y,M_I82T,Spike_D950N,Spike_S112L,NS7b_T40I,NSP13_P77L,Spike_E156G,NSP3_P1469S,Spike_T478K,NSP6_T77A,NS3_E239Q,NSP12_P323L,Spike_D614G,NSP4_V167L,Spike_L452R,Spike_Q779K)
hCoV-19/USA/WI-MHDL-2021120111/2021	EPI_ISL_7809465	2021-11-08	North America / USA / Wisconsin / Waukesha County	Human	Original	Illumina MiSeq	DRAGEN COVID lineage v3.5.4	AY.100	21J	Delta	GK	(N_G215C,Spike_T95I,N_D63G,N_R203M,NSP12_G671S,Spike_P82T,NS3_S26L,NSP13_A296S,Spike_P681R,Spike_R158del,NSP3_P1228L,NSP3_A488S,Spike_F157del,NSP4_T492I,NSP14_A394V,Spike_T19R,N_D377Y,M_I82T,Spike_D950N,NS7b_T40I,NSP13_P77L,Spike_E156G,NSP10_T102I,NSP2_P568L,NSP3_P1469S,NS8_Y31F,Spike_T478K,NSP6_T77A,NSP12_P323L,Spike_D614G,NSP4_V167L,Spike_L452R)
hCoV-19/USA/WI-MHDL-2021120112/2021	EPI_ISL_7809466	2021-11-08	North America / USA / Wisconsin / Waukesha County	Human	Original	Illumina MiSeq	DRAGEN COVID lineage v3.5.4	AY.103	21J	Delta	GK	(N_G215C,N_D63G,N_R203M,NSP12_G671S,NSP13_I334V,NSP2_A306S,NS3_S26L,NSP12_P112S,Spike_P681R,Spike_R158del,NSP3_P1228L,NS7a_V82A,NSP3_A488S,Spike_F157del,NSP4_T492I,NSP14_A394V,Spike_T19R,NS7a_T120I,N_D377Y,M_I82T,Spike_D950N,NS7b_T40I,NSP13_P77L,Spike_E156G,NSP3_P1469S,Spike_T478K,NSP6_T77A,NSP12_P323L,Spike_D614G,NSP4_V167L,Spike_L452R)
hCoV-19/USA/WI-MHDL-2021120113/2021	EPI_ISL_7809467	2021-11-08	North America / USA / Wisconsin / Ozaukee County	Human	Original	Illumina MiSeq	DRAGEN COVID lineage v3.5.4	AY.25	21J	Delta	GK	(N_G215C,N_D63G,N_R203M,NSP12_G671S,NS3_S26L,Spike_P681R,Spike_R158del,NSP3_P1228L,Spike_F157del,NSP3_A488S,NSP4_T492I,NSP14_A394V,Spike_T19R,N_D377Y,M_I82T,Spike_D950N,NS7b_T40I,NSP13_P77L,Spike_E156G,NSP3_P1469S,Spike_T478K,NSP6_T77A,NS3_E239Q,NS6_T21A,NSP12_P323L,Spike_D614G,NSP4_V167L,Spike_L452R,Spike_A522V)
hCoV-19/USA/WI-MHDL-2021120114/2021	EPI_ISL_7809468	2021-11-08	North America / USA / Wisconsin / Ozaukee County	Human	Original	Illumina MiSeq	DRAGEN COVID lineage v3.5.4	AY.47	21I	Delta	GK	(N_D63G,N_R203M,NSP12_G671S,Spike_V289I,N_G18V,NSP6_T181I,NS3_S26L,NSP3_K530N,Spike_P681R,Spike_R158del,NSP3_E815D,N_S206F,Spike_F157del,Spike_T19R,Spike_A222V,N_D377Y,M_I82T,NSP6_V149A,Spike_D950N,NSP3_P822L,NSP13_P77L,Spike_E156G,NSP4_A446V,Spike_T478K,NSP12_P323L,Spike_D614G,Spike_L452R)
hCoV-19/USA/WI-MHDL-2021120115/2021	EPI_ISL_7809469	2021-11-08	North America / USA / Wisconsin / Ozaukee County	Human	Original	Illumina MiSeq	DRAGEN COVID lineage v3.5.4	AY.47	21I	Delta	GK	(N_D63G,N_R203M,NSP12_G671S,Spike_V289I,N_G18V,NSP6_T181I,NS3_S26L,NSP3_K530N,Spike_P681R,Spike_R158del,NSP3_E815D,NS7a_V82A,N_S206F,Spike_F157del,Spike_T19R,NS7a_T120I,Spike_A222V,N_D377Y,M_I82T,NSP6_V149A,Spike_D950N,NSP3_P822L,NSP13_P77L,Spike_E156G,NSP4_A446V,Spike_T478K,NSP12_P323L,Spike_D614G,Spike_L452R)
hCoV-19/USA/WI-MHDL-2021120277/2021	EPI_ISL_7828341	2021-11-08	North America / USA / Wisconsin / Milwaukee County	Human	Original	Illumina MiSeq	DRAGEN COVID lineage v3.5.5	AY.25	21J	Delta	GK	(N_G215C,N_D63G,NSP12_I539T,N_R203M,NSP12_G671S,Spike_G142D,NS3_S26L,NSP3_K384N,Spike_P681R,Spike_R158del,NSP3_P1228L,NS7a_V82A,NSP3_A488S,Spike_F157del,NSP4_T492I,NSP14_A394V,Spike_T19R,NS7a_T120I,N_D377Y,M_I82T,Spike_D950N,NSP5_P96S,Spike_S112L,NS7b_T40I,NSP13_P77L,Spike_E156G,NSP3_P1469S,Spike_T478K,NSP6_T77A,NS3_E239Q,NSP12_P323L,Spike_D614G,NSP4_V167L,Spike_L452R)
hCoV-19/USA/WI-MHDL-2021120278/2021	EPI_ISL_7828342	2021-11-08	North America / USA / Wisconsin / Milwaukee County	Human	Original	Illumina MiSeq	DRAGEN COVID lineage v3.5.5	AY.103	21J	Delta	GK	(N_G215C,N_D63G,N_R203M,NSP12_G671S,NSP13_I334V,NS3_S26L,Spike_P681R,Spike_R158del,NSP3_P1228L,NSP3_A488S,Spike_F157del,NS3_L41R,NSP4_T492I,NSP14_A394V,Spike_T19R,N_D377Y,NSP15_V127F,M_I82T,Spike_D950N,NS7b_T40I,NSP13_P77L,Spike_E156G,NSP3_P1469S,Spike_T478K,NSP15_V10L,NSP6_T77A,NSP12_P323L,Spike_D614G,NSP3_D785A,NSP4_V167L,Spike_L452R,NSP2_H237R)
hCoV-19/USA/WI-MHDL-2021120279/2021	EPI_ISL_7828343	2021-11-08	North America / USA / Wisconsin / Waukesha County	Human	Original	Illumina MiSeq	DRAGEN COVID lineage v3.5.5	AY.44	21J	Delta	GK	(N_G215C,N_D63G,N_R203M,NSP12_G671S,NS3_S26L,Spike_P681R,NSP3_P1228L,NSP7_I68T,NSP3_A488S,NSP4_T492I,NSP14_A394V,Spike_T19R,NSP12_F192V,M_I82T,Spike_D950N,NSP3_A1736V,NSP13_P77L,NSP3_H1307Y,Spike_T604I,NSP3_P1469S,Spike_T478K,NSP6_T77A,NSP12_P323L,Spike_D614G,NSP4_V167L,Spike_L452R)
hCoV-19/USA/WI-MHDL-2021120280/2021	EPI_ISL_7828344	2021-11-08	North America / USA / Wisconsin / Milwaukee County	Human	Original	Illumina MiSeq	DRAGEN COVID lineage v3.5.5	AY.103	21J	Delta	GK	(N_G215C,N_D63G,N_R203M,NSP12_G671S,NSP13_I334V,Spike_G142D,NS3_S26L,NSP8_P178H,Spike_P681R,Spike_R158del,NSP3_P1228L,NS7a_V82A,NSP3_A488S,Spike_F157del,NSP4_T492I,NSP14_A394V,Spike_T19R,NS7a_T120I,N_D377Y,M_I82T,Spike_D950N,NS7b_T40I,NSP13_P77L,Spike_E156G,NSP3_P1469S,NSP3_K462N,Spike_T478K,NSP6_T77A,NSP12_P323L,Spike_D614G,NSP4_V167L,Spike_L452R)
hCoV-19/USA/WI-MHDL-2021120281/2021	EPI_ISL_7828345	2021-11-08	North America / USA / Wisconsin / Milwaukee County	Human	Original	Illumina MiSeq	DRAGEN COVID lineage v3.5.5	B.1.617.2	21J	Delta	GK	(N_G215C,N_D63G,N_R203M,NSP12_G671S,NSP3_E195D,NS3_S26L,Spike_P681R,NSP3_P1228L,NSP3_A488S,NSP4_T492I,NSP14_A394V,Spike_T19R,NSP12_N215K,N_D377Y,M_I82T,Spike_D950N,NS7b_T40I,NSP13_P77L,NSP3_P1469S,Spike_T478K,NSP3_V325F,NSP6_T77A,NSP12_P323L,NSP15_M218I,Spike_D614G,NSP4_V167L,Spike_L452R)
hCoV-19/USA/WI-MHDL-2021120282/2021	EPI_ISL_7828346	2021-11-08	North America / USA / Wisconsin / Milwaukee County	Human	Original	Illumina MiSeq	DRAGEN COVID lineage v3.5.5	AY.44	21J	Delta	GK	(N_G215C,NS8_L60F,N_D63G,N_R203M,NSP12_G671S,Spike_G142D,NS3_S26L,NSP10_N105S,Spike_P681R,Spike_R158del,NSP3_P1228L,NS7a_V82A,NSP3_A488S,Spike_F157del,NSP4_T492I,NSP14_A394V,Spike_T19R,NS7a_T120I,NSP12_F192V,NSP3_G1217V,NSP15_R206S,N_D377Y,NSP13_H164Y,M_I82T,Spike_D950N,NS7b_T40I,NSP3_A1736V,NSP13_P77L,Spike_E156G,NSP3_H1307Y,NSP3_P1469S,N_D402Y,Spike_T478K,NSP6_T77A,NSP12_P323L,Spike_D614G,NSP4_…
hCoV-19/USA/WI-MHDL-2021120283/2021	EPI_ISL_7828347	2021-11-08	North America / USA / Wisconsin / Milwaukee County	Human	Original	Illumina MiSeq	DRAGEN COVID lineage v3.5.5	AY.119	21J	Delta	GK	(N_G215C,Spike_P809S,Spike_T95I,N_D63G,N_R203M,NSP12_G671S,NSP12_S913L,Spike_G142D,NS3_S26L,Spike_P681R,Spike_R158del,NSP3_P1228L,NSP9_T24I,NS7a_V82A,NSP3_A488S,Spike_F157del,NSP4_T492I,NSP14_A394V,Spike_T19R,NS7a_T120I,N_D377Y,M_I82T,Spike_D950N,NS7a_P45del,NS7b_T40I,NSP13_P77L,NSP14_A323S,Spike_E156G,NSP3_P1469S,NSP3_P153L,NSP4_A92V,Spike_T478K,NSP6_T77A,NSP12_P323L,Spike_D614G,NSP4_V167L,Spike…
hCoV-19/USA/WI-MHDL-2021120285/2021	EPI_ISL_7828348	2021-11-08	North America / USA / Wisconsin / Racine County	Human	Original	Illumina MiSeq	DRAGEN COVID lineage v3.5.5	AY.3	21J	Delta	GK	(N_G215C,N_D63G,N_R203M,NS3_ins104P,NSP12_G671S,NS3_D210A,NSP6_I162V,Spike_G142D,NS3_S26L,Spike_P681R,Spike_R158del,NSP3_P1228L,NSP3_A488S,Spike_F157del,NSP4_T492I,NSP14_A394V,Spike_T19R,Spike_V70I,N_D377Y,M_I82T,Spike_D950N,NS7b_T40I,NSP13_P77L,Spike_E156G,NSP3_P1469S,Spike_T478K,NSP6_T77A,N_G34W,NSP12_P323L,Spike_D614G,NSP4_V167L,Spike_L452R)
hCoV-19/USA/WI-MHDL-2021120286/2021	EPI_ISL_7828349	2021-11-08	North America / USA / Wisconsin / Waukesha County	Human	Original	Illumina MiSeq	DRAGEN COVID lineage v3.5.5	AY.103	21J	Delta	GK	(N_G215C,N_D63G,N_R203M,NSP12_G671S,NSP13_I334V,Spike_G142D,NS3_S26L,Spike_P681R,Spike_R158del,NSP3_P1228L,NS7a_V82A,NSP3_A488S,Spike_F157del,NSP4_T492I,NSP14_A394V,Spike_T19R,NS7a_T120I,N_D377Y,M_I82T,M_I201V,Spike_D950N,NS7b_T40I,NSP13_P77L,Spike_E156G,NSP3_P1469S,Spike_T478K,NSP6_T77A,NSP12_P323L,Spike_D614G,NSP3_D785A,NSP4_V167L,Spike_L452R,NSP2_H237R)
hCoV-19/USA/WI-MHDL-2021120287/2021	EPI_ISL_7828350	2021-11-08	North America / USA / Wisconsin / Milwaukee County	Human	Original	Illumina MiSeq	DRAGEN COVID lineage v3.5.5	AY.103	21J	Delta	GK	(M_V23L,N_G215C,N_D63G,N_R203M,NSP12_G671S,NSP13_I334V,Spike_G142D,NS3_S26L,Spike_P681R,Spike_R158del,NS8_C25Y,NSP3_P1228L,NSP3_A488S,Spike_F157del,NSP4_T492I,NSP14_A394V,Spike_T19R,NS7a_T120I,N_D377Y,M_I82T,Spike_D950N,NS7b_T40I,NSP13_P77L,Spike_E156G,NSP3_P1469S,Spike_T478K,NSP6_T77A,NSP12_P323L,Spike_D614G,NSP4_V167L,Spike_L452R)
hCoV-19/USA/WI-MHDL-2021120288/2021	EPI_ISL_7828351	2021-11-08	North America / USA / Wisconsin / Waukesha County	Human	Original	Illumina MiSeq	DRAGEN COVID lineage v3.5.5	AY.3	21J	Delta	GK	(N_G215C,N_D63G,N_R203M,NS3_H78Y,NSP12_G671S,NSP6_I162V,Spike_G142D,NS3_S26L,M_H125Y,Spike_P681R,Spike_R158del,NSP3_P1228L,NSP4_S76N,NSP2_S263F,NS7a_V82A,NSP3_A488S,Spike_F157del,NSP4_T492I,NSP14_A394V,Spike_T19R,NS7a_T120I,N_D377Y,M_I82T,Spike_D950N,NS7b_T40I,NSP13_P77L,Spike_E156G,NSP3_P1469S,Spike_T478K,NSP6_T77A,NSP12_P323L,Spike_D614G,NSP4_V167L,Spike_L452R,NSP13_A18V)
hCoV-19/USA/WI-MHDL-2021120289/2021	EPI_ISL_7828352	2021-11-08	North America / USA / Wisconsin / Milwaukee County	Human	Original	Illumina MiSeq	DRAGEN COVID lineage v3.5.5	AY.103	21J	Delta	GK	(N_G215C,N_D63G,N_R203M,NSP12_G671S,NSP13_I334V,Spike_G142D,NS3_S26L,NSP8_P178H,Spike_P681R,Spike_R158del,NSP3_P1228L,NSP3_A488S,Spike_F157del,NSP4_T492I,NSP14_A394V,Spike_T19R,NS7a_T120I,NSP4_V180I,N_D377Y,M_I82T,Spike_D950N,NS7b_T40I,NSP13_P77L,Spike_E156G,NSP3_P1469S,NSP3_K462N,Spike_T478K,NSP6_T77A,NSP12_P323L,Spike_D614G,NSP4_V167L,Spike_L452R)
hCoV-19/USA/WI-MHDL-2021120290/2021	EPI_ISL_7828353	2021-11-08	North America / USA / Wisconsin / Milwaukee County	Human	Original	Illumina MiSeq	DRAGEN COVID lineage v3.5.5	AY.44	21J	Delta	GK	(N_G215C,NSP3_S377G,NS8_L60F,N_D63G,N_R203M,NSP3_A880V,NSP12_G671S,Spike_G142D,NS3_I232V,NS3_S26L,Spike_P681R,Spike_R158del,NSP3_P1228L,NSP3_F961L,NS7a_V82A,NSP3_A488S,Spike_F157del,NSP4_T492I,NSP14_A394V,Spike_T19R,NS7a_T120I,NSP12_F192V,N_D377Y,NSP13_H164Y,M_I82T,Spike_D950N,NS7b_T40I,NSP3_A1736V,NSP13_P77L,Spike_E156G,NSP3_H1307Y,NSP3_P1469S,Spike_T478K,NSP6_T77A,NSP12_P323L,Spike_D614G,NSP4_V…
hCoV-19/USA/WI-MHDL-2021120291/2021	EPI_ISL_7828354	2021-11-08	North America / USA / Wisconsin / Racine County	Human	Original	Illumina MiSeq	DRAGEN COVID lineage v3.5.5	AY.39.1	21J	Delta	GK	(N_G215C,N_D63G,N_R203M,NSP12_G671S,NSP16_Q238H,NS3_S26L,Spike_P681R,NSP3_P1228L,NS3_L95S,NS7a_V82A,NSP3_A488S,NSP4_T492I,NSP14_A394V,Spike_T19R,N_D377Y,M_I82T,NSP14_K349N,NSP15_A92T,Spike_D950N,NS7b_T40I,NSP13_P77L,NSP16_R216C,NSP3_P1469S,Spike_T478K,NS7a_V71I,NSP6_T77A,NSP12_P323L,NSP16_V294I,Spike_D614G,NSP4_V167L,Spike_L452R)
hCoV-19/USA/WI-MHDL-2021120292/2021	EPI_ISL_7828355	2021-11-08	North America / USA / Wisconsin / Racine County	Human	Original	Illumina MiSeq	DRAGEN COVID lineage v3.5.5	AY.39.1	21J	Delta	GK	(N_G215C,Spike_T95I,N_D63G,N_R203M,NSP12_G671S,NSP16_Q238H,NS3_S26L,Spike_P681R,Spike_R158del,NSP3_P1228L,NS3_L95S,NS7a_V82A,NSP3_A488S,Spike_F157del,NSP4_T492I,NSP14_A394V,Spike_T19R,NS7a_T120I,N_D377Y,M_I82T,NSP14_K349N,NSP15_A92T,Spike_D950N,NS7b_T40I,NSP13_P77L,Spike_E156G,NSP16_R216C,NSP3_P1469S,Spike_T478K,NS7a_V71I,NSP6_T77A,NSP12_P323L,NSP16_V294I,Spike_D614G,NSP4_V167L,Spike_L452R)
hCoV-19/USA/WI-MHDL-2021120293/2021	EPI_ISL_7828356	2021-11-08	North America / USA / Wisconsin / Milwaukee County	Human	Original	Illumina MiSeq	DRAGEN COVID lineage v3.5.5	AY.103	21J	Delta	GK	(N_G215C,N_D63G,N_R203M,NSP12_G671S,NSP13_I334V,Spike_R646H,NS3_S26L,Spike_P681R,Spike_R158del,NSP3_P1228L,NSP2_F300S,NSP3_A488S,Spike_F157del,NSP4_T492I,NSP14_A394V,Spike_T19R,N_D377Y,M_I82T,NSP6_Q208H,Spike_D950N,NS7b_T40I,NSP13_P77L,Spike_E156G,NSP3_P1469S,Spike_T478K,NSP6_T77A,NSP12_P323L,Spike_D614G,NSP4_V167L,Spike_L452R)
hCoV-19/USA/WI-MHDL-2021120294/2021	EPI_ISL_7828357	2021-11-08	North America / USA / Wisconsin / Waukesha County	Human	Original	Illumina MiSeq	DRAGEN COVID lineage v3.5.5	AY.103	21J	Delta	GK	(N_G215C,N_D63G,N_R203M,NSP12_G671S,NSP3_N1934T,NSP13_I334V,Spike_G142D,NS3_S26L,Spike_P681R,Spike_R158del,NSP3_P1228L,NS7a_R78C,NS7a_V82A,NSP3_A488S,Spike_F157del,NSP4_T492I,NSP14_A394V,Spike_T19R,NS7a_T120I,N_D377Y,M_I82T,Spike_D950N,NS7b_T40I,NSP13_P77L,Spike_R403K,Spike_E156G,NSP3_P1469S,Spike_T478K,NSP6_T77A,NSP9_T77I,NSP12_P323L,Spike_D614G,NSP4_V167L,Spike_L452R)
hCoV-19/USA/WI-MHDL-2021120295/2021	EPI_ISL_7828358	2021-11-08	North America / USA / Wisconsin / Waukesha County	Human	Original	Illumina MiSeq	DRAGEN COVID lineage v3.5.5	AY.103	21J	Delta	GK	(Spike_H69del,N_G215C,Spike_T95I,N_D63G,N_R203M,Spike_A67V,NSP12_G671S,NSP13_I334V,Spike_G142D,NSP14_T372I,NS3_S26L,NSP8_P178H,Spike_P681R,Spike_R158del,NSP3_P1228L,NS7a_V82A,NSP3_A488S,Spike_F157del,NSP4_T492I,NSP14_A394V,Spike_T19R,NS7a_T120I,N_D377Y,M_I82T,Spike_D950N,NS7b_T40I,NSP13_P77L,Spike_E156G,NSP3_P1469S,NSP3_K462N,Spike_T478K,Spike_V70del,NSP6_T77A,NSP12_P323L,Spike_D614G,NSP4_V167L,S…
hCoV-19/USA/WI-MHDL-2021120296/2021	EPI_ISL_7828359	2021-11-08	North America / USA / Wisconsin / Racine County	Human	Original	Illumina MiSeq	DRAGEN COVID lineage v3.5.5	AY.3	21J	Delta	GK	(N_G215C,N_D63G,N_R203M,NSP12_G671S,NSP6_I162V,Spike_G142D,NS3_S26L,Spike_P681R,Spike_R158del,NSP3_P1228L,NSP3_A488S,Spike_F157del,Spike_D178H,NSP4_T492I,NSP14_A394V,Spike_T19R,N_D377Y,M_I82T,Spike_D950N,NS7b_T40I,NSP13_P77L,Spike_E156G,NSP3_P1469S,Spike_T478K,NSP6_T77A,NSP5_Q273L,NSP12_P323L,Spike_D614G,NSP4_V167L,NSP5_I259L,Spike_L452R)
hCoV-19/USA/WI-MHDL-2021120297/2021	EPI_ISL_7828360	2021-11-08	North America / USA / Wisconsin / Milwaukee County	Human	Original	Illumina MiSeq	DRAGEN COVID lineage v3.5.5	AY.119	21J	Delta	GK	(N_G215C,Spike_P809S,Spike_T95I,N_D63G,N_R203M,NSP12_G671S,Spike_G142D,NS3_S26L,Spike_P681R,Spike_R158del,NSP3_P1228L,NS3_T9K,NSP9_T24I,NS7a_V82A,NSP3_A488S,Spike_F157del,NSP4_T492I,NSP14_A394V,Spike_T19R,NS7a_T120I,N_D377Y,M_I82T,Spike_D950N,NS7b_T40I,NSP13_P77L,NSP14_A323S,Spike_E156G,NSP3_P1469S,NSP4_A92V,Spike_T478K,NSP6_T77A,NSP15_V22L,NSP12_P323L,Spike_D614G,NSP4_V167L,Spike_L452R)
hCoV-19/USA/WI-MHDL-2021120298/2021	EPI_ISL_7828361	2021-11-08	North America / USA / Wisconsin / Waukesha County	Human	Original	Illumina MiSeq	DRAGEN COVID lineage v3.5.5	AY.103	21J	Delta	GK	(N_G215C,N_D63G,N_R203M,NSP8_T145I,NSP12_G671S,NSP13_I334V,Spike_G142D,NS3_S26L,Spike_P681R,Spike_R158del,NSP3_P1228L,NSP3_Q203H,NS8_R115C,NSP3_A488S,Spike_F157del,NSP4_T492I,NSP14_A394V,Spike_T19R,Spike_Q613H,N_D377Y,M_I82T,Spike_D950N,NS7b_T40I,NSP13_P77L,Spike_E156G,NSP3_P1469S,Spike_T478K,NSP6_T77A,NSP12_P323L,Spike_D614G,NSP4_V167L,Spike_L452R)
hCoV-19/USA/WI-MHDL-2021120063/2021	EPI_ISL_7829227	2021-11-08	North America / USA / Wisconsin / Milwaukee County	Human	Original	Illumina MiSeq	DRAGEN COVID lineage v3.5.4	AY.3	21J	Delta	GK	(N_G215C,N_D63G,N_R203M,NSP12_G671S,NSP6_I162V,NS3_S26L,Spike_P681R,Spike_R158del,NSP3_P1228L,NSP3_A488S,Spike_F157del,NSP4_T492I,NSP14_A394V,Spike_T19R,N_D377Y,M_I82T,Spike_D950N,NS7b_T40I,NSP13_P77L,Spike_E156G,NSP3_P1469S,Spike_T478K,NSP6_T77A,NSP12_P323L,Spike_D614G,NSP4_V167L,Spike_L452R)
hCoV-19/USA/WI-MHDL-2021120107/2021	EPI_ISL_7829228	2021-11-08	North America / USA / Wisconsin / Ozaukee County	Human	Original	Illumina MiSeq	DRAGEN COVID lineage v3.5.4	AY.3	21J	Delta	GK	(N_G215C,N_D63G,N_R203M,NSP12_G671S,NSP6_I162V,NSP13_S259L,NS3_S26L,NSP2_F368L,Spike_P681R,NSP3_P1228L,NSP3_A149V,NSP3_A488S,NSP4_T492I,NSP14_A394V,Spike_T19R,N_D377Y,M_I82T,Spike_D950N,NSP15_P118Q,NS7b_T40I,NSP13_P77L,NSP3_P1469S,Spike_T478K,NSP6_T77A,NSP3_C1641F,NSP12_P323L,Spike_D614G,NSP4_V167L,Spike_L452R)
hCoV-19/USA/WI-MHDL-2021110388/2021	EPI_ISL_6945722	2021-11-08	North America / USA / Wisconsin / Milwaukee County	Human	Original	Nanopore Clear Dx	BIP-WV6	AY.44	21J	Delta	GK	(N_G215C,NS8_L60F,N_D63G,N_R203M,NSP12_G671S,NS3_S26L,NSP2_P624S,Spike_P681R,Spike_R158del,NSP3_P1228L,NSP3_P340S,NS7a_V82A,NSP3_A488S,Spike_F157del,NSP4_T492I,NSP14_A394V,Spike_T19R,NS7a_T120I,NS3_T229I,NSP12_F192V,N_D377Y,NSP13_H164Y,M_I82T,Spike_D950N,NS7b_T40I,NSP3_A1736V,NSP13_P77L,Spike_E156G,NSP3_H1307Y,NS3_P240H,NSP3_P1469S,Spike_T478K,NSP6_T77A,NSP3_V418F,NSP12_P323L,Spike_D614G,NSP4_V16…
hCoV-19/USA/WI-MHDL-2021120001/2021	EPI_ISL_7153306	2021-11-08	North America / USA / Wisconsin / Milwaukee County	Human	Original	Nanopore Clear Dx	Medaka via artic 1.2.1	AY.119	21J	Delta	GK	(N_G215C,Spike_P809S,N_D63G,N_R203M,NSP12_G671S,NS3_S26L,Spike_P681R,Spike_R158del,NSP3_P1228L,NSP9_T24I,NS7a_V82A,NSP3_A488S,Spike_F157del,NSP4_T492I,NSP14_A394V,Spike_T19R,NS7a_T120I,N_D377Y,M_I82T,Spike_D950N,NS7b_T40I,NSP13_P77L,NSP14_A323S,Spike_E156G,NSP3_P1469S,NSP3_I508T,NSP10_G125S,NSP4_A92V,Spike_T478K,NSP6_T77A,NSP12_P323L,Spike_D614G,NSP4_V167L,Spike_L452R,NS3_L96P)
hCoV-19/USA/WI-MHDL-2021120011/2021	EPI_ISL_7153309	2021-11-08	North America / USA / Wisconsin / Milwaukee County	Human	Original	Nanopore Clear Dx	Medaka via artic 1.2.1	AY.37	21I	Delta	GK	(N_D63G,N_R203M,NSP12_G671S,NS3_V55F,NSP6_T181I,NS3_S26L,Spike_P681R,Spike_R158del,N_P122L,NS7a_V82A,Spike_F157del,Spike_T19R,NS7a_T120I,Spike_A222V,N_D377Y,M_I82T,NSP6_V149A,NSP2_E460D,Spike_D950N,NSP3_P822L,NSP13_P77L,Spike_V367L,Spike_E156G,NSP4_A446V,Spike_T478K,NSP14_P43L,NSP12_P323L,Spike_D614G,Spike_L452R)
hCoV-19/USA/WI-MHDL-2021120017/2021	EPI_ISL_7153311	2021-11-08	North America / USA / Wisconsin / Milwaukee County	Human	Original	Nanopore Clear Dx	Medaka via artic 1.2.1	AY.44	21J	Delta	GK	(N_G215C,NS8_L60F,N_R203M,NSP12_G671S,NS3_I236V,NS3_S26L,Spike_P681R,Spike_R158del,NSP3_P1228L,NS7a_V82A,NSP3_A488S,Spike_F157del,NSP4_T492I,Spike_Q677H,NSP14_A394V,Spike_T19R,NS7a_T120I,NSP12_F192V,N_D377Y,NSP13_H164Y,M_I82T,Spike_D950N,NS7b_T40I,NSP3_A1736V,NSP13_P77L,Spike_E156G,NSP3_H1307Y,NSP3_P1469S,NSP3_D1283Y,Spike_T478K,NSP6_T77A,N_D63S,NSP12_P323L,Spike_D614G,NSP4_V167L,Spike_L452R)
hCoV-19/USA/WI-MHDL-2021120019/2021	EPI_ISL_7153314	2021-11-08	North America / USA / Wisconsin / Milwaukee County	Human	Original	Nanopore Clear Dx	Medaka via artic 1.2.1	AY.103	21J	Delta	GK	(N_G215C,NSP2_T160I,N_D63G,N_R203M,NSP12_G671S,NSP13_I334V,NS6_K48N,NSP2_L448F,NS3_S26L,Spike_P681R,Spike_R158del,NSP3_P1228L,NS7a_V82A,NSP3_A488S,Spike_F157del,NSP4_T492I,NSP14_A394V,Spike_T19R,NS7a_T120I,N_D377Y,M_I82T,Spike_D215H,Spike_D950N,NSP5_P96S,NS7b_T40I,NSP13_P77L,Spike_E156G,NSP3_P1469S,Spike_T478K,NSP6_T77A,NSP12_P323L,Spike_D614G,NSP4_V167L,Spike_L452R)
hCoV-19/USA/WI-MHDL-2021120003/2021	EPI_ISL_7153344	2021-11-08	North America / USA / Wisconsin / Milwaukee County	Human	Original	Nanopore Clear Dx	Medaka via artic 1.2.1	AY.4	21J	Delta	GK	(NSP2_N209I,N_G215C,NSP3_A1711V,N_D63G,N_R203M,NSP12_G671S,NSP3_T1336I,NSP6_A117V,NS3_S26L,Spike_P681R,Spike_R158del,NSP3_P1228L,NS7a_V82A,NSP3_A488S,Spike_F157del,NSP4_T492I,NSP2_D155N,NSP14_A394V,Spike_T19R,NS7a_T120I,N_D377Y,M_I82T,Spike_D950N,NS7b_T40I,NSP13_P77L,Spike_E156G,NSP3_P1469S,Spike_T478K,NSP3_T787I,NSP6_T77A,NSP12_P323L,Spike_D614G,NSP4_V167L,Spike_L452R)
hCoV-19/USA/WI-MHDL-2021120012/2021	EPI_ISL_7153346	2021-11-08	North America / USA / Wisconsin / Milwaukee County	Human	Original	Nanopore Clear Dx	Medaka via artic 1.2.1	AY.100	21J	Delta	GK	(N_G215C,N_D63G,N_R203M,NSP12_G671S,NS3_S26L,NSP13_A296S,Spike_P681R,Spike_R158del,NSP3_P1228L,NSP8_D134E,NS7a_V82A,NSP3_A488S,Spike_F157del,NSP4_T492I,NSP14_A394V,Spike_T19R,NS7a_T120I,Spike_W258L,NSP7_S25L,N_D377Y,M_I82T,NSP1_R24C,Spike_D950N,NS7b_T40I,NSP13_P77L,Spike_E156G,NSP3_P1469S,Spike_T478K,NS7a_V71I,NSP6_T77A,N_A182T,NSP12_P323L,Spike_D614G,NSP4_V167L,Spike_L452R)
hCoV-19/USA/WI-MHDL-2021120013/2021	EPI_ISL_7153350	2021-11-08	North America / USA / Wisconsin / Milwaukee County	Human	Original	Nanopore Clear Dx	Medaka via artic 1.2.1	AY.100	21J	Delta	GK	(N_G215C,N_D63G,N_R203M,NSP12_G671S,NS3_S26L,NSP13_A296S,Spike_P681R,Spike_R158del,NSP3_P1228L,NSP8_D134E,NS7a_V82A,NSP3_A488S,Spike_F157del,NSP4_T492I,NSP14_A394V,Spike_T19R,NS7a_T120I,Spike_W258L,NSP7_S25L,N_D377Y,M_I82T,NSP1_R24C,Spike_D950N,NS7b_T40I,NSP13_P77L,Spike_E156G,NSP3_P1469S,Spike_T478K,NS7a_V71I,NSP6_T77A,N_A182T,NSP12_P323L,Spike_D614G,NSP4_V167L,Spike_L452R)
hCoV-19/USA/WI-MHDL-2021120008/2021	EPI_ISL_7153355	2021-11-08	North America / USA / Wisconsin / Milwaukee County	Human	Original	Nanopore Clear Dx	Medaka via artic 1.2.1	AY.103	21J	Delta	GK	(N_G215C,N_D63G,N_R203M,NSP8_T145I,NSP12_G671S,NSP13_I334V,NS3_S26L,Spike_P681R,Spike_R158del,NSP3_P1228L,NS7a_V82A,NSP3_A488S,Spike_F157del,NSP4_T492I,NSP14_A394V,Spike_T19R,NS7a_T120I,N_D377Y,M_I82T,Spike_D950N,NS7b_T40I,NSP13_P77L,Spike_E156G,NSP3_P1469S,Spike_T478K,NSP7_D44A,NSP6_T77A,NSP12_P323L,Spike_D614G,NSP4_V167L,Spike_L452R,Spike_G181R)
hCoV-19/USA/WI-MHDL-2021120002/2021	EPI_ISL_7153358	2021-11-08	North America / USA / Wisconsin / Milwaukee County	Human	Original	Nanopore Clear Dx	Medaka via artic 1.2.1	AY.103	21J	Delta	GK	(N_G215C,N_D63G,NSP1_M85del,N_R203M,NSP12_G671S,NSP13_I334V,NS3_S26L,Spike_P681R,Spike_R158del,NS8_C25Y,NSP3_P1228L,NS7a_V82A,NSP3_A488S,Spike_F157del,NSP4_T492I,NSP14_A394V,Spike_T19R,NS7a_T120I,NSP12_P227L,N_D377Y,M_I82T,Spike_D950N,NS7b_T40I,NSP13_P77L,NSP1_V86del,Spike_E156G,NSP8_K37N,NSP3_P1469S,Spike_T478K,NSP6_L260F,NSP6_T77A,NSP12_P323L,Spike_D614G,NSP4_V167L,Spike_L452R)
hCoV-19/USA/WI-MHDL-2021120016/2021	EPI_ISL_7153361	2021-11-08	North America / USA / Wisconsin / Milwaukee County	Human	Original	Nanopore Clear Dx	Medaka via artic 1.2.1	AY.3	21J	Delta	GK	(N_G215C,NSP12_G841S,N_D63G,N_R203M,NSP12_G671S,NSP6_I162V,NS3_S26L,Spike_P681R,Spike_R158del,NSP3_P1228L,NS7a_V82A,NSP3_A488S,Spike_F157del,NSP4_T492I,NSP14_A394V,Spike_T19R,NS7a_T120I,Spike_Q613H,N_D377Y,M_I82T,Spike_D950N,NSP2_L271F,NS7b_T40I,NSP13_P77L,Spike_E156G,NSP3_P1469S,Spike_T478K,NSP6_T77A,NSP12_P323L,Spike_D614G,NSP4_V167L,Spike_L452R)
hCoV-19/USA/WI-MHDL-2021120015/2021	EPI_ISL_7153364	2021-11-08	North America / USA / Wisconsin / Milwaukee County	Human	Original	Nanopore Clear Dx	Medaka via artic 1.2.1	AY.100	21J	Delta	GK	(N_G215C,N_D63G,NSP12_G671S,NS3_S26L,NSP13_A296S,Spike_P681R,Spike_R158del,NSP3_P1228L,NS7a_V82A,NSP3_A488S,Spike_F157del,NSP4_T492I,NSP14_A394V,Spike_T19R,NS7a_T120I,N_D377Y,M_I82T,Spike_D950N,NS7b_T40I,NS3_I118V,NSP13_P77L,Spike_E156G,NS3_E102Q,NSP16_M20I,NSP3_P1469S,NS8_Y31F,Spike_T478K,NSP6_T77A,NSP12_P323L,Spike_D614G,NSP4_V167L,Spike_L452R,N_E31A,N_R203V)
hCoV-19/USA/WI-MHDL-2021120014/2021	EPI_ISL_7153367	2021-11-08	North America / USA / Wisconsin / Milwaukee County	Human	Original	Nanopore Clear Dx	Medaka via artic 1.2.1	AY.103	21J	Delta	GK	(N_G215C,N_D63G,N_R203M,NSP12_G671S,NSP13_I334V,NS3_S26L,Spike_P681R,Spike_R158del,NSP3_P1228L,NS7a_V82A,NSP3_A488S,Spike_F157del,NS3_L41R,NSP4_T492I,NSP14_A394V,Spike_T19R,NS7a_T120I,N_D377Y,NSP15_V127F,M_I82T,Spike_D950N,NS7b_T40I,N_S26C,NSP13_P77L,Spike_E156G,NSP3_P1469S,NSP12_P323L,Spike_D614G,NSP3_D785A,NSP4_V167L,NSP2_H237R)
hCoV-19/USA/WI-MHDL-2021120005/2021	EPI_ISL_7153369	2021-11-08	North America / USA / Wisconsin / Milwaukee County	Human	Original	Nanopore Clear Dx	Medaka via artic 1.2.1	AY.103	21J	Delta	GK	(N_G215C,N_D63G,N_R203M,NSP12_G671S,NSP13_I334V,NS3_S26L,NSP8_P178H,Spike_P681R,NSP3_P1228L,NS7a_V82A,NSP3_A488S,NSP4_T492I,NSP14_A394V,Spike_T19R,NS7a_T120I,N_D377Y,M_I82T,Spike_D950N,NS7b_T40I,NSP13_P77L,NSP3_T820A,NSP3_P1469S,NSP6_T77A,NSP12_P323L,Spike_D614G,NSP4_V167L,NSP15_S328L)
hCoV-19/USA/WI-MHDL-2021120032/2021	EPI_ISL_7281394	2021-11-08	North America / USA / Wisconsin / Milwaukee County	Human	Original	Nanopore Clear Dx	BIP-WV6	AY.25	21J	Delta	GK	(N_G215C,N_D63G,N_R203M,NSP12_G671S,NS3_S26L,Spike_P681R,Spike_R158del,NSP3_P1228L,NS7a_V82A,NSP3_A488S,Spike_F157del,NSP4_T492I,Spike_T19R,NSP14_A394V,NS7a_T120I,N_D377Y,M_I82T,Spike_D950N,NS7b_T40I,NSP13_P77L,Spike_E156G,Spike_T678I,NSP3_P1469S,NSP6_T77A,NS3_E239Q,NSP9_R39K,NSP12_P323L,Spike_D614G,NSP4_V167L,NSP8_V34F,Spike_V1122L)
hCoV-19/USA/WI-MHDL-2021120033/2021	EPI_ISL_7281403	2021-11-08	North America / USA / Wisconsin / Milwaukee County	Human	Original	Nanopore Clear Dx	BIP-WV6	AY.3	21J	Delta	GK	(N_G215C,N_D63G,N_R203M,NSP12_G671S,NSP6_I162V,NSP12_M666I,NS3_S26L,NS3_D155Y,Spike_P681R,Spike_R158del,NSP3_P1228L,Spike_S172Y,NSP12_T293I,NS7a_V82A,NSP3_A488S,Spike_F157del,NSP4_T492I,NSP14_A394V,Spike_T19R,NS7a_T120I,N_D377Y,M_I82T,Spike_D950N,NS7b_T40I,NSP13_P77L,NSP2_I273T,Spike_E156G,NSP3_P1469S,Spike_T478K,NSP15_T48I,NSP6_T77A,NSP1_G49C,NSP12_P323L,Spike_D614G,NSP4_V167L,Spike_L452R)
hCoV-19/USA/WI-MHDL-2021120034/2021	EPI_ISL_7281412	2021-11-08	North America / USA / Wisconsin / Milwaukee County	Human	Original	Nanopore Clear Dx	BIP-WV6	AY.3	21J	Delta	GK	(N_G215C,N_D63G,N_R203M,NSP12_G671S,NS3_D210A,NSP6_I162V,NS3_S26L,Spike_P681R,Spike_R158del,NSP3_P1228L,NS7a_V82A,NSP3_A488S,Spike_F157del,NSP4_T492I,NSP14_A394V,Spike_T19R,NS7a_T120I,N_D377Y,M_I82T,Spike_D950N,NS7b_T40I,NSP13_P77L,Spike_E156G,NSP3_P1469S,Spike_T478K,NSP6_T77A,N_G34W,NSP12_P323L,Spike_D614G,Spike_L452R,NSP4_V167L)
hCoV-19/USA/WI-MHDL-2021120036/2021	EPI_ISL_7281419	2021-11-08	North America / USA / Wisconsin / Waukesha County	Human	Original	Nanopore Clear Dx	BIP-WV6	AY.103	21J	Delta	GK	(N_G215C,N_D63G,N_R203M,NSP12_G671S,NSP13_I334V,NS3_V77F,NS3_S26L,Spike_P681R,Spike_R158del,NSP3_P1228L,NS7a_V82A,NSP3_A488S,Spike_F157del,NSP4_T492I,NSP14_A394V,Spike_T19R,NS7a_T120I,N_D377Y,NSP3_S794L,M_I82T,Spike_D950N,NS7b_T40I,NSP13_P77L,Spike_E156G,NSP3_P1469S,Spike_T478K,NSP6_T77A,NSP12_P323L,Spike_D614G,NSP4_V167L,Spike_L452R)
hCoV-19/USA/WI-MHDL-2021110510/2021	EPI_ISL_7368707	2021-11-08	North America / USA / Wisconsin / Milwaukee County	Human	Original	Nanopore Clear Dx	BIP-WV6	AY.103	21J	Delta	GK	(N_G215C,NSP12_G108S,N_D63G,N_R203M,NSP12_G671S,NSP3_L312F,NSP13_I334V,NS3_S26L,Spike_P681R,Spike_R158del,NSP3_P1228L,NS7a_V82A,NSP3_A488S,Spike_F157del,NSP4_T492I,NSP14_A394V,Spike_T19R,NS7a_T120I,N_D377Y,M_I82T,Spike_D950N,NS7b_T40I,NSP13_P77L,Spike_E156G,NS7a_H47Y,NSP3_P1469S,Spike_T478K,NSP6_T77A,NSP12_P323L,Spike_D614G,NSP4_V167L,Spike_L452R)
hCoV-19/USA/WI-MHDL-2021110511/2021	EPI_ISL_7368708	2021-11-08	North America / USA / Wisconsin / Milwaukee County	Human	Original	Nanopore Clear Dx	BIP-WV6	AY.25	21J	Delta	GK	(N_G215C,N_D63G,NSP1_M85del,N_R203M,NSP12_G671S,NS3_D173A,NS3_S26L,Spike_P681R,NSP1_H83del,Spike_R158del,NSP3_P1228L,NS7a_R78C,NS7a_V82A,NSP1_G82del,NSP3_A488S,Spike_F157del,NS8_P36S,NSP4_T492I,NSP14_A394V,Spike_T19R,NS7a_T120I,NS7a_F63del,N_D377Y,M_I82T,Spike_D950N,NS7b_T40I,NSP13_P77L,NSP1_V86del,Spike_E156G,NSP1_V84del,NSP3_P1469S,Spike_T478K,NS7a_Q62H,NSP6_T77A,NS3_E239Q,NSP9_R39K,NSP12_P323L…
hCoV-19/USA/WI-MHDL-2021110512/2021	EPI_ISL_7368709	2021-11-08	North America / USA / Wisconsin / Milwaukee County	Human	Original	Nanopore Clear Dx	BIP-WV6	AY.100	21J	Delta	GK	(N_G215C,N_D63G,N_R203M,NSP12_G671S,NS3_S26L,NSP13_A296S,Spike_P681R,Spike_R158del,NSP3_P1228L,NSP8_D134E,NS7a_V82A,NSP3_A488S,Spike_F157del,NSP4_T492I,NSP14_A394V,Spike_T19R,NS7a_T120I,Spike_W258L,NSP7_S25L,N_D377Y,M_I82T,NSP1_R24C,Spike_D950N,NS7b_T40I,NSP13_P77L,Spike_E156G,NSP3_P1469S,Spike_T478K,NS7a_V71I,NSP6_T77A,N_A182T,NSP12_P323L,Spike_D614G,NSP4_V167L,Spike_L452R)
hCoV-19/USA/WI-MHDL-2021110513/2021	EPI_ISL_7368710	2021-11-08	North America / USA / Wisconsin / Milwaukee County	Human	Original	Nanopore Clear Dx	BIP-WV6	AY.44	21J	Delta	GK	(N_G215C,NS8_L60F,N_D63G,N_R203M,NSP12_G671S,NS3_S26L,Spike_L5F,Spike_P681R,Spike_R158del,NSP3_P1228L,NS7a_V82A,NSP3_A488S,Spike_F157del,NSP4_T492I,NSP14_A394V,Spike_T19R,NS7a_T120I,NSP12_F192V,N_D377Y,NSP13_H164Y,M_I82T,Spike_D950N,NS8_W45C,NS7b_T40I,NSP3_A1736V,NSP13_P77L,Spike_E156G,NSP3_H1307Y,Spike_T478K,NSP6_T77A,NSP12_P323L,Spike_D614G,NSP4_V167L,Spike_L452R)
hCoV-19/USA/WI-MHDL-2021110514/2021	EPI_ISL_7368712	2021-11-08	North America / USA / Wisconsin / Milwaukee County	Human	Original	Nanopore Clear Dx	BIP-WV6	AY.103	21J	Delta	GK	(N_G215C,N_D63G,N_R203M,NSP12_G671S,NSP13_I334V,NSP5_S46P,NS3_S26L,Spike_P681R,Spike_R158del,NSP3_P1228L,NS7a_V82A,NSP3_A488S,Spike_F157del,NSP4_T492I,NSP14_A394V,Spike_T19R,NS7a_T120I,N_D377Y,M_I82T,Spike_D950N,NS7b_T40I,NSP13_P77L,Spike_E156G,NSP3_P1469S,Spike_T478K,NSP6_T77A,NSP14_S137I,NSP5_L220F,NSP12_P323L,Spike_D614G,NSP4_V167L,Spike_L452R)
hCoV-19/USA/WI-MHDL-2021110471/2021	EPI_ISL_6861979	2021-11-09	North America / USA / Wisconsin / Milwaukee County	Human	Original	Illumina MiSeq	DRAGEN COVID lineage v3.5.4	AY.25	21J	Delta	GK	(N_G215C,N_D63G,N_R203M,NSP12_G671S,NS3_S26L,Spike_P681R,Spike_R158del,NSP3_P1228L,NSP3_A488S,Spike_F157del,NSP3_D136G,NSP4_T492I,NSP14_A394V,Spike_T19R,N_D377Y,M_I82T,Spike_D950N,NS7b_T40I,NSP13_P77L,Spike_E156G,M_T30I,NSP3_P1469S,Spike_T478K,NSP6_T77A,NS3_E239Q,NSP12_P323L,Spike_D614G,NSP4_V167L,Spike_L452R)
hCoV-19/USA/WI-MHDL-2021110472/2021	EPI_ISL_6861980	2021-11-09	North America / USA / Wisconsin / Milwaukee County	Human	Original	Illumina MiSeq	DRAGEN COVID lineage v3.5.4	AY.103	21J	Delta	GK	(N_G215C,N_D63G,N_R203M,Spike_H1058Y,NSP12_G671S,NSP3_L312F,NSP13_I334V,Spike_G142D,NS3_S26L,Spike_P681R,Spike_R158del,NSP3_P1228L,NS7a_V82A,NSP3_A488S,Spike_F157del,NSP4_T492I,NSP14_A394V,Spike_T19R,NS7a_T120I,N_D377Y,M_I82T,Spike_D950N,NS7b_T40I,NSP13_P77L,Spike_E156G,NS7a_H47Y,NSP3_P1469S,Spike_T478K,NSP6_T77A,NSP12_P323L,Spike_D614G,NSP4_V167L,Spike_L452R)
hCoV-19/USA/WI-MHDL-2021120088/2021	EPI_ISL_7809444	2021-11-09	North America / USA / Wisconsin / Washington County	Human	Original	Illumina MiSeq	DRAGEN COVID lineage v3.5.4	AY.3	21J	Delta	GK	(N_G215C,N_D63G,N_R203M,NSP12_G671S,NSP6_I162V,NS6_P57S,NSP12_A581T,NS3_S26L,Spike_P681R,Spike_R158del,NSP3_P1228L,NS7a_V82A,NSP3_A488S,Spike_F157del,NSP4_T492I,NSP14_A394V,Spike_T19R,NS7a_T120I,N_D377Y,M_I82T,Spike_D950N,NS7b_T40I,NSP13_P77L,Spike_E156G,NSP3_P1469S,Spike_T478K,NSP6_T77A,NSP12_P323L,N_Q9H,NSP5_K90R,Spike_D614G,NSP4_V167L,Spike_L452R)
hCoV-19/USA/WI-MHDL-2021110389/2021	EPI_ISL_6945723	2021-11-09	North America / USA / Wisconsin / Milwaukee County	Human	Original	Nanopore Clear Dx	BIP-WV6	AY.47	21I	Delta	GK	(N_D63G,N_R203M,NSP12_G671S,Spike_V289I,N_G18V,NSP6_T181I,NS3_S26L,Spike_P681R,Spike_R158del,NSP3_E815D,NS7a_V82A,Spike_F157del,Spike_T19R,NS7a_T120I,Spike_A222V,N_D377Y,M_I82T,NSP6_V149A,Spike_D950N,NSP3_P822L,NS3_I118V,NSP13_P77L,Spike_E156G,NS3_H93Y,NSP4_A446V,Spike_T478K,NS3_Q213K,NSP12_P323L,Spike_D614G,Spike_L452R)
hCoV-19/USA/WI-MHDL-2021110390/2021	EPI_ISL_6945724	2021-11-09	North America / USA / Wisconsin / Milwaukee County	Human	Original	Nanopore Clear Dx	BIP-WV6	AY.103	21J	Delta	GK	(N_G215C,N_D63G,N_R203M,NSP14_H26Y,NSP12_G671S,NSP13_I334V,NS3_S26L,Spike_L5F,NSP8_P178H,Spike_P681R,Spike_R158del,NSP3_P1228L,NS7a_V82A,NSP3_A488S,Spike_F157del,NSP4_T492I,NSP14_A394V,Spike_T19R,NS7a_T120I,N_D377Y,M_I82T,Spike_D950N,NS7b_T40I,NSP13_P77L,Spike_E156G,NSP3_P1469S,Spike_T478K,NSP6_T77A,NSP12_P323L,Spike_D614G,NSP4_V167L,Spike_L452R)
hCoV-19/USA/WI-MHDL-2021110454/2021	EPI_ISL_6861963	2021-11-10	North America / USA / Wisconsin / Milwaukee County	Human	Original	Illumina MiSeq	DRAGEN COVID lineage v3.5.4	AY.39	21J	Delta	GK	(NSP4_V99M,N_G215C,NSP3_T181I,NSP4_S34F,Spike_T95I,N_D63G,N_R203M,NSP12_G671S,NSP16_Q238H,NSP3_E195D,Spike_G142D,NS3_S26L,Spike_P681R,Spike_R158del,NSP3_P1228L,NSP9_D78N,NS7a_V82A,NSP3_A488S,Spike_F157del,NSP4_T492I,NSP14_A394V,Spike_T19R,NS7a_T120I,N_D377Y,M_I82T,Spike_D950N,NSP3_G76D,NS7b_T40I,NSP2_A476S,NSP13_P77L,Spike_E156G,NSP3_P1469S,NSP13_A368V,Spike_T478K,NS7a_V71I,NSP6_T77A,Spike_R1107K…
hCoV-19/USA/WI-MHDL-2021110455/2021	EPI_ISL_6861964	2021-11-10	North America / USA / Wisconsin / Milwaukee County	Human	Original	Illumina MiSeq	DRAGEN COVID lineage v3.5.4	AY.47	21I	Delta	GK	(N_D63G,N_R203M,NSP12_G671S,Spike_V289I,Spike_G142D,N_G18V,NSP6_T181I,NS3_S26L,Spike_P681R,Spike_R158del,NSP3_E815D,NS7a_V82A,NS8_R115C,Spike_F157del,Spike_T19R,NS7a_T120I,Spike_A222V,N_D377Y,M_I82T,NSP6_V149A,Spike_D950N,NSP3_P822L,NSP13_P77L,Spike_E156G,NSP5_G71C,NSP4_A446V,Spike_T478K,NS3_V225I,NSP12_P323L,Spike_D614G,NSP12_N722D,Spike_L452R)
hCoV-19/USA/WI-MHDL-2021110456/2021	EPI_ISL_6861965	2021-11-10	North America / USA / Wisconsin / Milwaukee County	Human	Original	Illumina MiSeq	DRAGEN COVID lineage v3.5.4	AY.103	21J	Delta	GK	(N_G215C,N_D63G,N_R203M,NSP12_G671S,NSP13_I334V,NSP6_H11Y,Spike_G142D,NS3_S26L,Spike_P681R,Spike_R158del,NSP3_P1228L,NSP3_A488S,Spike_F157del,NSP4_T492I,NSP14_A394V,Spike_T19R,NS7a_T120I,NS3_G44R,N_D377Y,M_I82T,Spike_D950N,NS7b_T40I,NSP13_P77L,Spike_E156G,NSP3_P1469S,Spike_A1078S,Spike_T478K,NSP6_T77A,NSP2_S351N,NSP12_P323L,Spike_D614G,NSP4_V167L,Spike_L452R,NSP16_T140I)
hCoV-19/USA/WI-MHDL-2021110453/2021	EPI_ISL_6864926	2021-11-10	North America / USA / Wisconsin / Kenosha County	Human	Original	Illumina MiSeq	DRAGEN COVID lineage v3.5.4	AY.100	21J	Delta	GK	(N_G215C,Spike_T95I,N_D63G,N_R203M,NSP12_G671S,NS7b_I26L,NS7b_M24C,Spike_G142D,NS7b_L17C,NS3_S26L,NS7b_V21F,NSP13_A296S,Spike_P681R,Spike_R158del,NSP3_P1228L,NS7a_V82A,NS7b_L14stop,NSP3_A488S,Spike_F157del,NS7b_F19S,NSP4_T492I,NSP14_A394V,Spike_T19R,NS7a_T120I,N_D377Y,M_I82T,Spike_D950N,NS7b_T40I,NSP13_P77L,Spike_E156G,NS7b_L22stop,NSP3_P1469S,NS8_Y31F,Spike_T478K,NSP6_T77A,NSP12_P323L,NS7b_I23L,…
hCoV-19/USA/WI-MHDL-2021120089/2021	EPI_ISL_7809445	2021-11-10	North America / USA / Wisconsin / Kenosha County	Human	Original	Illumina MiSeq	DRAGEN COVID lineage v3.5.4	AY.103	21J	Delta	GK	(NSP3_I1192T,N_G215C,N_D63G,N_R203M,NSP12_G671S,NSP13_I334V,Spike_G142D,NS3_S26L,NS3_V13L,Spike_P681R,Spike_R158del,NSP3_P1228L,NS7a_V82A,NSP3_A488S,Spike_F157del,NSP4_T492I,NSP14_A394V,Spike_T19R,NS7a_T120I,N_D377Y,M_I82T,Spike_D950N,NS7b_T40I,NSP3_A1736V,NSP13_P77L,NSP15_P205L,Spike_E156G,Spike_T547I,NSP3_P1469S,Spike_T478K,NSP6_T77A,NSP4_T295A,NSP12_P323L,N_A251S,Spike_D614G,NSP4_V167L,Spike_L…
hCoV-19/USA/WI-MHDL-2021110391/2021	EPI_ISL_6945725	2021-11-10	North America / USA / Wisconsin / Milwaukee County	Human	Original	Nanopore Clear Dx	BIP-WV6	AY.25	21J	Delta	GK	(N_G215C,N_D63G,N_R203M,NSP12_G671S,NSP6_L142F,NS3_S26L,NSP12_I466V,Spike_P681R,Spike_R158del,NSP3_P1228L,NS7a_V82A,NSP3_A488S,Spike_F157del,NSP4_T492I,NSP3_T1590I,NSP14_A394V,Spike_T19R,NS7a_T120I,N_D377Y,M_I82T,Spike_D950N,NS7b_T40I,NSP13_P77L,N_K370E,NSP15_I305V,Spike_E156G,NSP3_P1469S,Spike_T478K,NSP6_T77A,NS3_E239Q,NSP12_P323L,Spike_D614G,NSP4_V167L,Spike_L452R)
hCoV-19/USA/WI-MHDL-2021110480/2021	EPI_ISL_6861988	2021-11-11	North America / USA / Wisconsin / Milwaukee County	Human	Original	Illumina MiSeq	DRAGEN COVID lineage v3.5.4	AY.103	21J	Delta	GK	(N_G215C,N_D63G,N_R203M,NSP12_G671S,NSP13_I334V,Spike_G142D,NS3_S26L,NSP8_P178H,Spike_P681R,Spike_R158del,NSP3_P1228L,NS7a_V82A,NSP3_A488S,Spike_F157del,NSP4_T492I,NSP14_A394V,Spike_T19R,NS7a_T120I,N_D377Y,M_I82T,Spike_D950N,NS7b_T40I,NSP13_P77L,Spike_E156G,NSP3_P1469S,Spike_T478K,NSP6_T77A,NSP12_P323L,Spike_D614G,NSP4_V167L,Spike_L452R)
hCoV-19/USA/WI-MHDL-2021110481/2021	EPI_ISL_6861989	2021-11-11	North America / USA / Wisconsin / Milwaukee County	Human	Original	Illumina MiSeq	DRAGEN COVID lineage v3.5.4	AY.3	21J	Delta	GK	(N_G215C,N_D63G,N_R203M,Spike_I1221V,NSP12_G671S,NSP6_I162V,Spike_G142D,NS3_S26L,Spike_P681R,Spike_R158del,NSP3_P1228L,NS7a_V82A,NSP3_A488S,Spike_F157del,NSP4_T492I,NSP14_A394V,Spike_T19R,NS7a_T120I,N_D377Y,M_I82T,Spike_D950N,NS7b_T40I,NSP13_P77L,Spike_E156G,NSP3_T656I,NSP3_P1469S,Spike_T478K,NSP6_T77A,NSP12_P323L,Spike_D614G,NSP4_V167L,Spike_L452R)
hCoV-19/USA/WI-MHDL-2021110482/2021	EPI_ISL_6861990	2021-11-11	North America / USA / Wisconsin / Milwaukee County	Human	Original	Illumina MiSeq	DRAGEN COVID lineage v3.5.4	AY.39	21J	Delta	GK	(N_G215C,N_D63G,N_R203M,NSP12_G671S,NSP16_Q238H,NSP3_E195D,NS3_S26L,Spike_P681R,Spike_R158del,NSP3_P1228L,NS7a_V82A,NSP3_A488S,Spike_F157del,NSP4_T492I,NSP14_A394V,Spike_T19R,NS7a_T120I,N_D377Y,M_I82T,Spike_D950N,NS7b_T40I,NSP13_P77L,Spike_E156G,NSP3_P1469S,Spike_T478K,NSP3_V325F,NS7a_V71I,NSP6_T77A,NSP12_P323L,Spike_D614G,NSP4_V167L,Spike_L452R)
hCoV-19/USA/WI-MHDL-2021110485/2021	EPI_ISL_6861993	2021-11-11	North America / USA / Wisconsin / Milwaukee County	Human	Original	Illumina MiSeq	DRAGEN COVID lineage v3.5.4	AY.44	21J	Delta	GK	(N_G215C,N_D63G,N_R203M,NS8_C102Y,NSP12_G671S,Spike_G142D,NSP14_K13R,NS3_S26L,Spike_P681R,Spike_R158del,NSP3_P1228L,NSP13_M576I,NS7a_V82A,NSP3_A488S,Spike_F157del,E_N64S,NSP4_T492I,NSP14_A394V,Spike_T19R,NS7a_T120I,NSP12_F192V,N_D377Y,M_I82T,Spike_D950N,NS7b_T40I,NSP3_A1736V,NSP13_P77L,Spike_E156G,NSP3_P1469S,Spike_T478K,NSP6_T77A,NSP12_P323L,NS3_G49V,NSP5_K90R,Spike_D614G,NSP4_V167L,Spike_L452R)
hCoV-19/USA/WI-MHDL-2021110473/2021	EPI_ISL_6861981	2021-11-12	North America / USA / Wisconsin / Milwaukee County	Human	Original	Illumina MiSeq	DRAGEN COVID lineage v3.5.4	AY.103	21J	Delta	GK	(N_G215C,N_D63G,N_R203M,NSP12_G671S,NSP13_I334V,Spike_G142D,NS3_S26L,Spike_P681R,Spike_R158del,NSP3_P1228L,NS7a_V82A,NSP3_A488S,Spike_F157del,NSP4_T492I,NSP14_A394V,Spike_T19R,NS7a_T120I,N_D377Y,M_I82T,NSP2_R27C,Spike_D950N,NS7b_T40I,NSP13_P77L,NSP1_G146V,Spike_E156G,NSP3_P1469S,Spike_T478K,NSP6_T77A,NSP12_P323L,Spike_D614G,NSP4_V167L,Spike_L452R)
hCoV-19/USA/WI-MHDL-2021110474/2021	EPI_ISL_6861982	2021-11-12	North America / USA / Wisconsin / Milwaukee County	Human	Original	Illumina MiSeq	DRAGEN COVID lineage v3.5.4	AY.103	21J	Delta	GK	(N_G215C,N_D63G,N_R203M,NSP12_G671S,NSP13_I334V,Spike_G142D,NS3_S26L,Spike_P681R,Spike_R158del,NSP3_P1228L,NS7a_V82A,NSP3_A488S,Spike_F157del,NSP4_T492I,NSP14_A394V,Spike_T19R,NS7a_T120I,N_D377Y,M_I82T,Spike_D950N,NS7b_T40I,NSP13_P77L,NSP1_G146V,Spike_E156G,NSP3_P1469S,Spike_T478K,NSP6_T77A,NSP12_P323L,Spike_D614G,NSP4_V167L,Spike_L452R)
hCoV-19/USA/WI-MHDL-2021110484/2021	EPI_ISL_6861992	2021-11-12	North America / USA / Wisconsin / Milwaukee County	Human	Original	Illumina MiSeq	DRAGEN COVID lineage v3.5.4	AY.103	21J	Delta	GK	(N_G215C,N_D63G,N_R203M,NSP12_G671S,NSP13_I334V,NSP3_A1642V,Spike_G142D,NSP6_K270R,NS3_S26L,Spike_P681R,Spike_R158del,NSP3_P1228L,NS7a_V82A,NSP3_A488S,Spike_F157del,NSP4_T492I,NS6_Q8E,NSP14_A394V,Spike_T19R,NS7a_T120I,N_D377Y,M_I82T,Spike_D950N,NS7b_T40I,NSP13_P77L,Spike_E156G,NSP2_H194Y,NSP3_P1469S,Spike_T478K,NSP6_T77A,NSP12_P323L,Spike_D614G,NSP4_V167L,Spike_L452R,Spike_N354T,NSP13_M274I)
hCoV-19/USA/WI-MHDL-2021110335/2021	EPI_ISL_6571153	2021-11-12	North America / USA / Wisconsin / Milwaukee County	Human	Original	Nanopore Clear Dx	BIP-WV6	AY.25.1	21J	Delta	GK	(N_G215C,N_D63G,NSP4_I23V,N_R203M,NSP12_G671S,Spike_G142D,NS3_S26L,NSP12_R349S,Spike_P681R,Spike_R158del,Spike_T572I,NSP3_P1228L,NS7a_V82A,NSP3_A488S,Spike_F157del,NSP4_T492I,NSP14_A394V,Spike_T19R,NS7a_T120I,Spike_W258L,N_D377Y,M_I82T,NSP6_C197F,Spike_D950N,NS7b_T40I,NSP13_P77L,NSP2_K456T,Spike_E156G,NSP3_P1469S,Spike_T478K,NSP6_T77A,NS3_E239Q,NSP12_P323L,Spike_D614G,NSP4_V167L,Spike_L452R,NSP3_…
hCoV-19/USA/WI-MHDL-2021110336/2021	EPI_ISL_6571154	2021-11-12	North America / USA / Wisconsin / Milwaukee County	Human	Original	Nanopore Clear Dx	BIP-WV6	AY.119.2	21J	Delta	GK	(N_G215C,N_D63G,N_R203M,NSP12_G671S,NS3_S26L,Spike_P681R,Spike_R158del,NSP3_P1228L,NSP9_V76F,NS8_A65S,Spike_Q675H,NS7a_V82A,NSP3_A488S,Spike_F157del,NSP4_T492I,NSP14_A394V,Spike_T19R,NS7a_T120I,N_D377Y,M_I82T,Spike_D950N,NS7b_T40I,NSP13_P77L,NSP14_A323S,Spike_E156G,NSP16_N285T,NSP3_P1469S,NSP4_A92V,Spike_D1139Y,NSP6_T77A,NSP12_P323L,Spike_D614G,NSP4_V167L)
hCoV-19/USA/WI-MHDL-2021110475/2021	EPI_ISL_6861983	2021-11-14	North America / USA / Wisconsin / Milwaukee County	Human	Original	Illumina MiSeq	DRAGEN COVID lineage v3.5.4	AY.25	21J	Delta	GK	(N_G215C,N_D63G,N_R203M,NSP12_G671S,Spike_R21T,NS3_S26L,Spike_P681R,NSP3_P1228L,NSP14_A100S,NSP3_A488S,NSP4_T492I,NSP14_A394V,Spike_T19R,N_D377Y,M_I82T,Spike_D950N,NS7b_T40I,NSP13_P77L,Spike_T547I,NSP3_P1469S,NSP6_T77A,NS3_E239Q,N_G236V,NSP12_P323L,Spike_D614G,NSP4_V167L)
hCoV-19/USA/WI-MHDL-2021110476/2021	EPI_ISL_6861984	2021-11-14	North America / USA / Wisconsin / Milwaukee County	Human	Original	Illumina MiSeq	DRAGEN COVID lineage v3.5.4	AY.25	21J	Delta	GK	(N_G215C,N_D63G,N_R203M,NSP12_G671S,NS3_S26L,Spike_P681R,NSP3_P1228L,NSP3_A488S,NSP4_T492I,NSP5_P108L,NSP14_A394V,Spike_T19R,M_I82T,Spike_D950N,NSP13_P77L,NSP3_E122D,NSP3_P1469S,Spike_T478K,NSP6_T77A,NS3_E239Q,NSP9_R39K,NSP6_A2V,NSP12_P323L,Spike_D614G,NSP4_V167L,Spike_L452R)
hCoV-19/USA/WI-MHDL-2021110477/2021	EPI_ISL_6861985	2021-11-15	North America / USA / Wisconsin / Milwaukee County	Human	Original	Illumina MiSeq	DRAGEN COVID lineage v3.5.4	AY.103	21J	Delta	GK	(N_G215C,N_D63G,N_R203M,NSP12_G671S,NSP3_M1901V,NSP13_I334V,Spike_G142D,NS3_S26L,Spike_P681R,Spike_R158del,NSP3_P1228L,NS7a_V82A,NSP3_A488S,Spike_F157del,NSP4_T492I,Spike_T19R,NSP14_A394V,NS7a_T120I,N_D377Y,M_I82T,Spike_D950N,NS7b_T40I,NSP13_P77L,NSP2_T434I,Spike_E156G,NSP3_P1469S,NSP2_T85I,Spike_T478K,NSP6_T77A,NSP12_P323L,Spike_D614G,NSP4_V167L,Spike_L452R,Spike_P26L)
hCoV-19/USA/WI-MHDL-2021110478/2021	EPI_ISL_6861986	2021-11-15	North America / USA / Wisconsin / Milwaukee County	Human	Original	Illumina MiSeq	DRAGEN COVID lineage v3.5.4	AY.103	21J	Delta	GK	(N_G215C,N_D63G,N_R203M,NSP12_G671S,NSP13_I334V,Spike_G142D,NSP14_T372I,NS3_S26L,NSP8_P178H,Spike_P681R,Spike_R158del,NSP3_P1228L,NS7a_V82A,NSP3_A488S,Spike_F157del,NSP4_T492I,NSP14_A394V,Spike_T19R,NS7a_T120I,N_D377Y,M_I82T,Spike_D950N,NS7b_T40I,NSP13_P77L,Spike_E156G,NSP3_P1469S,NSP3_K462N,Spike_T478K,NSP6_T77A,NSP5_A173V,NSP12_P323L,Spike_D614G,NSP4_V167L,Spike_L452R,NSP3_L1126S)
hCoV-19/USA/WI-MHDL-2021110479/2021	EPI_ISL_6861987	2021-11-15	North America / USA / Wisconsin / Waukesha County	Human	Original	Illumina MiSeq	DRAGEN COVID lineage v3.5.4	AY.25	21J	Delta	GK	(N_G215C,N_D63G,N_R203M,NSP12_G671S,Spike_G142D,NS3_G251V,NS3_S26L,Spike_P681R,Spike_R158del,NSP3_P1228L,NS7a_V82A,NSP3_A488S,Spike_F157del,NSP4_T492I,NSP14_A394V,Spike_T19R,NS7a_T120I,N_D377Y,M_I82T,Spike_D950N,Spike_S112L,NS7b_T40I,NSP13_P77L,Spike_E156G,M_T30I,NSP3_P1469S,Spike_T478K,NSP6_T77A,NS3_E239Q,NSP12_P323L,Spike_D614G,NSP4_V167L,Spike_L452R)
hCoV-19/USA/WI-MHDL-2021110483/2021	EPI_ISL_6861991	2021-11-15	North America / USA / Wisconsin / Milwaukee County	Human	Original	Illumina MiSeq	DRAGEN COVID lineage v3.5.4	AY.44	21J	Delta	GK	(N_G215C,NS8_L60F,N_D63G,N_R203M,NSP12_G671S,Spike_G142D,NS3_S26L,NSP2_P624S,Spike_P681R,Spike_R158del,NSP3_P1228L,NSP3_P340S,NS7a_V82A,NSP3_A488S,Spike_F157del,NSP4_T492I,NSP14_A394V,Spike_T19R,NS7a_T120I,NSP12_F192V,N_D377Y,NSP13_H164Y,M_I82T,Spike_D950N,NS7b_T40I,NSP3_A1736V,NSP2_S122Y,NSP13_P77L,Spike_E156G,NSP3_H1307Y,NSP3_P1469S,Spike_T478K,NSP6_T77A,NSP3_V418F,NSP12_P323L,Spike_D614G,NSP4_…
hCoV-19/USA/WI-MHDL-2021110362/2021	EPI_ISL_6945699	2021-11-15	North America / USA / Wisconsin / Milwaukee County	Human	Original	Nanopore Clear Dx	BIP-WV6	AY.103	21J	Delta	GK	(M_I82T,N_D63G,Spike_D950N,NS7b_T40I,NSP13_P77L,NSP3_P1469S,NS3_S26L,Spike_T478K,Spike_P681R,NSP12_P323L,NSP4_V167L,Spike_L452R,NSP3_A488S,NSP6_V149F)
hCoV-19/USA/WI-MHDL-2021110363/2021	EPI_ISL_6945700	2021-11-15	North America / USA / Wisconsin / Milwaukee County	Human	Original	Nanopore Clear Dx	BIP-WV6	AY.75	21I	Delta	GK	(N_D63G,N_R203M,NSP12_G671S,NSP6_T181I,NS3_S26L,Spike_P681R,Spike_R158del,NSP12_I66L,NS7a_V82A,Spike_F157del,Spike_T19R,NS7a_T120I,Spike_A222V,N_D377Y,M_I82T,NSP6_V149A,Spike_D950N,NSP3_P822L,NSP13_P77L,Spike_E156G,NSP6_L125F,NSP4_A446V,Spike_T478K,NSP12_P323L,Spike_D614G,Spike_L452R,Spike_P812S)
hCoV-19/USA/WI-MHDL-2021120025/2021	EPI_ISL_7153317	2021-11-15	North America / USA / Wisconsin / Milwaukee County	Human	Original	Nanopore Clear Dx	Medaka via artic 1.2.1	AY.47	21I	Delta	GK	(NSP2_D449E,N_D63G,N_R203M,NSP12_G671S,Spike_V289I,N_G18V,NSP6_T181I,NS3_S26L,Spike_P681R,Spike_R158del,NSP3_E815D,NS7a_V82A,Spike_F157del,Spike_T19R,NS7a_T120I,Spike_A222V,N_D377Y,M_I82T,NSP6_V149A,Spike_D950N,NSP3_P822L,NSP13_P77L,NSP12_T739I,Spike_E156G,NSP4_A446V,Spike_T478K,NSP12_P323L,Spike_D614G,Spike_L452R,N_S255F)
hCoV-19/USA/WI-MHDL-2021120090/2021	EPI_ISL_7809446	2021-11-16	North America / USA / Wisconsin / Milwaukee County	Human	Original	Illumina MiSeq	DRAGEN COVID lineage v3.5.4	AY.113	21J	Delta	GK	(N_G215C,N_D63G,NSP2_R365Q,N_R203M,NSP12_G671S,NSP12_P264S,NS8_V33F,NS3_S26L,NSP15_D91G,Spike_P681R,Spike_R158del,NSP3_P1228L,NSP4_T204I,NSP3_A488S,Spike_F157del,NSP4_T492I,NSP14_A394V,Spike_T19R,N_D377Y,M_I82T,Spike_D950N,NS7b_T40I,NSP13_P77L,Spike_E156G,NSP3_P1469S,Spike_T478K,NSP6_T77A,NSP5_K90R,Spike_D614G,NSP4_V167L,Spike_L452R)
hCoV-19/USA/WI-MHDL-2021110364/2021	EPI_ISL_6945701	2021-11-16	North America / USA / Wisconsin / Milwaukee County	Human	Original	Nanopore Clear Dx	BIP-WV6	AY.100	21J	Delta	GK	(N_G215C,N_D63G,N_R203M,NSP12_G671S,NSP2_T223I,NS3_S26L,NSP13_A296S,Spike_P681R,Spike_R158del,NSP3_P1228L,NS3_V256A,NS3_L219F,NS7a_V82A,NSP3_A488S,Spike_F157del,NSP4_T492I,NSP14_A394V,Spike_T19R,NS7a_T120I,N_D377Y,M_I82T,NSP2_A385T,Spike_D950N,NS7b_T40I,NSP13_P77L,Spike_E156G,NSP3_P1469S,Spike_T478K,NSP6_T77A,NSP3_V1209L,NSP12_P323L,Spike_D614G,Spike_L452R,NSP4_V167L)
hCoV-19/USA/WI-MHDL-2021110365/2021	EPI_ISL_6945702	2021-11-16	North America / USA / Wisconsin / Milwaukee County	Human	Original	Nanopore Clear Dx	BIP-WV6	AY.25.1	21J	Delta	GK	(N_G215C,N_D63G,NSP3_T819I,N_R203M,NSP2_A205V,NSP12_G671S,NS3_S26L,Spike_P681R,Spike_R158del,NSP3_P1228L,NS7a_V82A,NSP3_A488S,Spike_F157del,NSP4_T492I,NSP14_A394V,Spike_T19R,NS7a_T120I,N_D377Y,M_I82T,NSP2_E587K,NSP6_C197F,Spike_D950N,NSP13_P77L,Spike_E156G,NSP3_P1469S,NSP2_T531A,Spike_T478K,NSP6_T77A,NSP12_P830S,NS3_E239Q,NSP12_P323L,Spike_D614G,NSP4_V167L,Spike_L452R,NSP3_D410G)
hCoV-19/USA/WI-MHDL-2021120022/2021	EPI_ISL_7153320	2021-11-16	North America / USA / Wisconsin / Waukesha County	Human	Original	Nanopore Clear Dx	Medaka via artic 1.2.1	AY.103	21J	Delta	GK	(N_G215C,N_D63G,N_R203M,NS3_H78Y,NSP12_G671S,NSP13_I334V,NS3_S26L,NSP8_P178H,Spike_P681R,Spike_R158del,NSP3_P1228L,NSP12_N909S,NS7a_V82A,NSP3_A488S,Spike_F157del,NSP4_T492I,NSP4_L353F,NSP14_A394V,Spike_T19R,NS7a_T120I,N_D377Y,M_I82T,Spike_D950N,NS7b_T40I,NSP13_P77L,Spike_E156G,NSP3_P1469S,Spike_T478K,NSP6_T77A,NSP4_T114I,NSP12_P323L,Spike_D614G,NSP4_V167L,Spike_L452R)
hCoV-19/USA/WI-MHDL-2021120023/2021	EPI_ISL_7153323	2021-11-16	North America / USA / Wisconsin / Milwaukee County	Human	Original	Nanopore Clear Dx	Medaka via artic 1.2.1	AY.103	21J	Delta	GK	(N_G215C,N_D63G,N_R203M,NSP12_G671S,NSP13_I334V,NSP4_S336L,NS3_S26L,Spike_P681R,Spike_R158del,NSP3_P1228L,NS7a_V82A,NSP3_A488S,Spike_F157del,NSP4_T492I,NSP14_A394V,Spike_T19R,NS7a_T120I,N_D377Y,M_I82T,Spike_D950N,NS7b_T40I,NSP13_P77L,Spike_E156G,NS8_R115S,NSP3_P1469S,Spike_T478K,NS7a_P45L,NSP6_T77A,NSP2_W450C,NSP12_P323L,Spike_D614G,NSP4_V167L,Spike_L452R)
hCoV-19/USA/WI-MHDL-2021120024/2021	EPI_ISL_7153326	2021-11-16	North America / USA / Wisconsin / Milwaukee County	Human	Original	Nanopore Clear Dx	Medaka via artic 1.2.1	AY.103	21J	Delta	GK	(N_G215C,N_D63G,N_R203M,NSP12_G671S,NSP13_I334V,NS3_S26L,Spike_P681R,Spike_R158del,NSP3_P1228L,NS7a_V82A,NSP3_A488S,Spike_F157del,NSP4_T492I,NSP14_A394V,Spike_T19R,NS7a_T120I,N_D377Y,M_I82T,Spike_D950N,NS7b_T40I,NSP13_P77L,NSP1_G146V,Spike_E156G,NSP3_P1469S,Spike_T478K,NSP6_T77A,NSP12_P323L,Spike_D614G,Spike_L452R,NSP4_V167L)
hCoV-19/USA/WI-MHDL-2021110366/2021	EPI_ISL_6945703	2021-11-17	North America / USA / Wisconsin / Milwaukee County	Human	Original	Nanopore Clear Dx	BIP-WV6	AY.25	21J	Delta	GK	(N_G215C,N_D63G,N_R203M,NSP12_G671S,NS3_S26L,Spike_P681R,Spike_R158del,NSP3_P1228L,NS7a_V82A,NSP3_A488S,Spike_F157del,NSP3_D136G,NSP4_T492I,NSP14_A394V,Spike_T19R,NS7a_T120I,N_D377Y,M_I82T,Spike_D950N,NS7b_T40I,NSP13_P77L,Spike_E156G,M_T30I,NSP3_P1469S,Spike_T478K,NSP6_T77A,NS3_E239Q,NSP12_P323L,Spike_D614G,NSP4_V167L,Spike_L452R)
hCoV-19/USA/WI-MHDL-2021110367/2021	EPI_ISL_6945704	2021-11-17	North America / USA / Wisconsin / Milwaukee County	Human	Original	Nanopore Clear Dx	BIP-WV6	AY.43	21J	Delta	GK	(N_G215C,N_D63G,N_R203M,NSP12_G671S,NS3_S26L,Spike_P681R,Spike_R158del,NSP3_P1228L,NSP15_T33I,NS7a_V82A,NSP3_A488S,Spike_F157del,NSP4_T492I,NSP14_A394V,Spike_T19R,NS7a_T120I,N_D377Y,M_I82T,Spike_D950N,N_Q9L,NS7b_T40I,NSP13_P77L,Spike_E156G,NSP14_V282I,Spike_P1079S,NSP3_P1469S,NSP12_L838I,NSP6_T77A,NSP1_E41G,NSP12_P323L,Spike_D614G,NSP4_V167L,NSP6_L37F)
hCoV-19/USA/WI-MHDL-2021110368/2021	EPI_ISL_6945705	2021-11-17	North America / USA / Wisconsin / Milwaukee County	Human	Original	Nanopore Clear Dx	BIP-WV6	AY.25	21J	Delta	GK	(N_G215C,N_D63G,N_R203M,NSP12_G671S,NS3_S26L,Spike_P681R,Spike_R158del,NSP3_P1228L,NS7a_V82A,NSP3_A488S,Spike_F157del,NSP4_T492I,NSP14_A394V,Spike_T19R,NS7a_T120I,N_D377Y,M_I82T,Spike_D950N,NS7b_T40I,NSP13_P77L,NSP15_S161I,Spike_E156G,M_T30I,NSP3_P1469S,Spike_T478K,NSP6_T77A,NS3_E239Q,NSP12_P323L,Spike_D614G,NSP4_V167L,Spike_L452R)
hCoV-19/USA/WI-MHDL-2021110369/2021	EPI_ISL_6945706	2021-11-17	North America / USA / Wisconsin / Milwaukee County	Human	Original	Nanopore Clear Dx	BIP-WV6	AY.25	21J	Delta	GK	(N_G215C,N_D63G,N_R203M,NSP12_G671S,NS3_S26L,Spike_P681R,Spike_R158del,NSP3_P1228L,NS7a_V82A,Spike_F157del,NSP3_A488S,NSP4_T492I,NSP14_A394V,Spike_T19R,NS7a_T120I,N_D377Y,M_I82T,Spike_D950N,NS7b_T40I,NSP13_P77L,Spike_E156G,NSP3_P1469S,Spike_T478K,NSP6_T77A,NS3_E239Q,NS6_T21A,NSP12_P323L,Spike_D614G,NSP4_V167L,Spike_L452R,Spike_A522V)
hCoV-19/USA/WI-MHDL-2021120091/2021	EPI_ISL_7809447	2021-11-18	North America / USA / Wisconsin / Milwaukee County	Human	Original	Illumina MiSeq	DRAGEN COVID lineage v3.5.4	AY.103	21J	Delta	GK	(N_G215C,N_D63G,N_R203M,NSP12_G671S,NSP13_I334V,NS3_S26L,Spike_P681R,Spike_R158del,NSP3_P1228L,NSP3_A488S,Spike_F157del,NSP4_T492I,NSP14_A394V,Spike_T19R,N_D377Y,M_I82T,NSP2_R27C,Spike_D950N,NS7b_T40I,NSP13_P77L,NSP1_G146V,Spike_E156G,NSP3_P1469S,Spike_T478K,NSP6_T77A,NSP12_P323L,Spike_D614G,NSP4_V167L,Spike_L452R)
hCoV-19/USA/WI-MHDL-2021120026/2021	EPI_ISL_7153329	2021-11-18	North America / USA / Wisconsin / Milwaukee County	Human	Original	Nanopore Clear Dx	Medaka via artic 1.2.1	AY.37	21I	Delta	GK	(N_D63G,N_R203M,NSP12_G671S,NSP6_T181I,NS3_S26L,Spike_P681R,Spike_R158del,N_P122L,NS7a_V82A,Spike_F157del,Spike_T19R,NS7a_T120I,Spike_A222V,N_D377Y,M_I82T,NSP6_V149A,NSP2_E460D,Spike_D950N,NSP3_P822L,NSP13_P77L,Spike_V367L,Spike_E156G,NSP4_A446V,Spike_T478K,NSP14_H455Y,NSP14_P43L,NSP12_P323L,Spike_D614G,NSP6_L37F,NSP14_I338L,Spike_L452R,NSP3_A534V)
hCoV-19/USA/WI-MHDL-2021120028/2021	EPI_ISL_7153341	2021-11-18	North America / USA / Wisconsin / Milwaukee County	Human	Original	Nanopore Clear Dx	Medaka via artic 1.2.1	AY.37	21I	Delta	GK	(N_D63G,N_R203M,NSP12_G671S,NSP6_T181I,NS3_S26L,Spike_P681R,Spike_R158del,N_P122L,NS7a_V82A,Spike_F157del,Spike_T19R,NS7a_T120I,Spike_A222V,N_D377Y,M_I82T,NSP6_V149A,NSP2_E460D,Spike_D950N,NSP3_P822L,NSP13_P77L,Spike_V367L,Spike_E156G,NSP4_A446V,Spike_T478K,NSP14_H455Y,NSP14_P43L,NSP12_P323L,Spike_D614G,NSP6_L37F,NSP14_I338L,Spike_L452R,NSP3_A534V)
hCoV-19/USA/WI-MHDL-2021120027/2021	EPI_ISL_7153352	2021-11-18	North America / USA / Wisconsin / Milwaukee County	Human	Original	Nanopore Clear Dx	Medaka via artic 1.2.1	AY.37	21I	Delta	GK	(N_D63G,N_R203M,NSP12_G671S,NSP6_T181I,NS3_S26L,Spike_P681R,Spike_R158del,N_P122L,NS7a_V82A,Spike_F157del,Spike_T19R,NS7a_T120I,Spike_A222V,N_D377Y,M_I82T,NSP6_V149A,NSP2_E460D,Spike_D950N,NSP3_P822L,NSP13_P77L,Spike_V367L,Spike_E156G,NSP4_A446V,Spike_T478K,NSP14_H455Y,NSP14_P43L,NSP12_P323L,Spike_D614G,NSP6_L37F,NSP14_I338L,Spike_L452R,NSP3_A534V)
hCoV-19/USA/WI-MHDL-2021120092/2021	EPI_ISL_7809448	2021-11-19	North America / USA / Wisconsin / Waukesha County	Human	Original	Illumina MiSeq	DRAGEN COVID lineage v3.5.4	B.1.617.2	21I	Delta	GK	(N_G215C,N_D63G,N_R203M,NSP8_T145I,NSP12_G671S,NSP6_T181I,NS3_S26L,Spike_P681R,Spike_R158del,NSP8_I2M,Spike_F157del,Spike_T19R,N_D377Y,M_I82T,NSP6_V149A,Spike_D950N,NS7b_T40I,NSP3_P822L,NSP13_P77L,Spike_E156G,NSP4_A446V,Spike_T478K,NSP12_P323L,Spike_D614G,Spike_L452R)
hCoV-19/USA/WI-MHDL-2021120020/2021	EPI_ISL_7153332	2021-11-19	North America / USA / Wisconsin / Milwaukee County	Human	Original	Nanopore Clear Dx	Medaka via artic 1.2.1	AY.103	21J	Delta	GK	(N_G215C,N_D63G,N_R203M,NSP12_G671S,NSP13_I334V,NSP2_T34I,NS3_S26L,Spike_P681R,Spike_R158del,NSP3_P1228L,NS7a_V82A,NSP3_A488S,Spike_F157del,NSP4_T492I,NSP14_A394V,Spike_T19R,NS7a_T120I,N_D377Y,M_I82T,Spike_D950N,NS7b_T40I,NSP13_P77L,Spike_E156G,NSP3_P1469S,Spike_T478K,NSP6_T77A,NSP14_S369F,NSP12_P323L,Spike_D614G,NSP4_V167L,Spike_L452R)
hCoV-19/USA/WI-MHDL-2021120021/2021	EPI_ISL_7153335	2021-11-19	North America / USA / Wisconsin / Milwaukee County	Human	Original	Nanopore Clear Dx	Medaka via artic 1.2.1	AY.47	21I	Delta	GK	(NSP2_E574K,N_D63G,N_R203M,NSP5_P108S,NSP12_G671S,Spike_V289I,N_G18V,NSP6_T181I,NS3_S26L,Spike_P681R,Spike_R158del,NSP3_E815D,NS7a_V82A,Spike_F157del,Spike_T19R,NS7a_T120I,Spike_A222V,N_D377Y,M_I82T,NSP6_V149A,Spike_D950N,NSP3_P822L,NSP13_P77L,Spike_E156G,NSP4_A446V,NSP3_P153L,Spike_T478K,NSP5_A193V,NSP12_P323L,NS3_K61R,Spike_D614G,Spike_L452R)
hCoV-19/USA/WI-MHDL-2021120093/2021	EPI_ISL_7809449	2021-11-20	North America / USA / Wisconsin / Waukesha County	Human	Original	Illumina MiSeq	DRAGEN COVID lineage v3.5.4	B.1.617.2	21I	Delta	GK	(N_G215C,N_D63G,N_R203M,NSP8_T145I,NSP12_G671S,NSP6_T181I,NS3_S26L,Spike_P681R,Spike_R158del,NSP8_I2M,NS7a_V82A,Spike_F157del,Spike_T19R,N_D377Y,M_I82T,NSP6_V149A,Spike_D950N,NS7b_T40I,NSP3_P822L,NSP13_P77L,Spike_E156G,NSP4_A446V,Spike_T478K,NSP12_P323L,Spike_D614G,Spike_L452R)
hCoV-19/USA/WI-MHDL-2021120230/2021	EPI_ISL_7828311	2021-11-20	North America / USA / Wisconsin / Milwaukee County	Human	Original	Illumina MiSeq	DRAGEN COVID lineage v3.5.5	AY.44	21J	Delta	GK	(N_G215C,NS8_L60F,N_D63G,N_R203M,NSP12_G671S,NS3_S26L,Spike_P681R,Spike_R158del,NSP3_P1228L,NS7a_V82A,NSP3_A488S,Spike_F157del,NSP4_T492I,NSP14_A394V,Spike_T19R,NS7a_T120I,NSP12_F192V,N_D377Y,NSP13_H164Y,M_I82T,Spike_D950N,NS7b_T40I,NSP3_A1736V,NSP12_A16V,NSP13_P77L,Spike_E156G,NSP3_H1307Y,NSP3_P1469S,Spike_T478K,NSP6_T77A,NSP12_P323L,Spike_D614G,NSP4_V167L,Spike_L452R)
hCoV-19/USA/WI-MHDL-2021120231/2021	EPI_ISL_7828312	2021-11-20	North America / USA / Wisconsin / Milwaukee County	Human	Original	Illumina MiSeq	DRAGEN COVID lineage v3.5.5	AY.39	21J	Delta	GK	(N_G215C,N_D63G,N_R203M,NSP12_G671S,NS3_S26L,Spike_P681R,Spike_R158del,NSP3_P1228L,NS3_L95S,NS7a_V82A,NSP3_A488S,Spike_F157del,NSP4_T492I,NSP14_A394V,Spike_T19R,NS7a_T120I,NSP2_A375V,N_D377Y,M_I82T,Spike_D950N,NSP5_P96S,NS7b_T40I,NSP13_P77L,Spike_Q23R,Spike_E156G,NSP3_P1469S,NSP16_Q238Y,NS7a_V71I,NSP6_T77A,NSP4_T237I,NSP12_P323L,Spike_D614G,NSP4_V167L)
hCoV-19/USA/WI-MHDL-2021120233/2021	EPI_ISL_7828313	2021-11-20	North America / USA / Wisconsin / Milwaukee County	Human	Original	Illumina MiSeq	DRAGEN COVID lineage v3.5.5	AY.117	21J	Delta	GK	(N_G215C,N_D63G,N_R203M,NSP12_G671S,NSP13_Q518H,NS3_S26L,Spike_P681R,Spike_R158del,NSP3_I335V,NSP3_P1228L,NS7a_V82A,NSP3_A488S,Spike_F157del,NSP4_T492I,NSP13_T214I,NSP14_A394V,Spike_T19R,NS7a_T120I,N_D377Y,M_I82T,M_I201V,Spike_D950N,NS7b_T40I,NSP13_P77L,Spike_E156G,Spike_T604I,NSP3_P1469S,Spike_T478K,NSP2_W466L,NSP2_K335Q,NSP6_T77A,NSP12_P323L,NSP15_M218I,NSP12_A706T,Spike_D614G,NSP4_V167L,Spike_…
hCoV-19/USA/WI-MHDL-2021120237/2021	EPI_ISL_7828315	2021-11-20	North America / USA / Wisconsin / Waukesha County	Human	Original	Illumina MiSeq	DRAGEN COVID lineage v3.5.5	AY.25	21J	Delta	GK	(NS7a_P84T,N_G215C,N_D63G,NSP12_I539T,N_R203M,NSP12_G671S,NS3_S26L,NSP3_K384N,Spike_P681R,Spike_R158del,NSP3_P1228L,NS7a_V82A,NSP3_A488S,Spike_F157del,NSP4_T492I,NSP14_A394V,Spike_T19R,NS7a_T120I,N_D377Y,M_I82T,Spike_D950N,NSP5_P96S,Spike_S112L,NS7b_T40I,NSP13_P77L,Spike_E156G,NSP3_P1469S,Spike_T478K,NSP6_T77A,NS3_E239Q,NSP12_P323L,Spike_D614G,NSP4_V167L,Spike_L452R)
hCoV-19/USA/WI-MHDL-2021120238/2021	EPI_ISL_7828316	2021-11-20	North America / USA / Wisconsin / Waukesha County	Human	Original	Illumina MiSeq	DRAGEN COVID lineage v3.5.5	AY.103	21J	Delta	GK	(N_G215C,N_D63G,N_R203M,NSP8_T145I,NSP12_G671S,NSP13_I334V,NS3_S26L,Spike_P681R,Spike_R158del,NSP3_P1228L,NSP3_Q203H,NS7a_V82A,NS8_R115C,NSP3_A488S,Spike_F157del,NSP4_T492I,NSP14_A394V,Spike_T19R,NS7a_T120I,Spike_Q613H,N_D377Y,M_I82T,NSP3_M84I,Spike_D950N,NS7b_T40I,NSP13_P77L,Spike_E156G,NSP3_P1469S,Spike_T478K,NSP6_T77A,NSP12_P323L,Spike_D614G,NSP4_V167L,Spike_L452R)
hCoV-19/USA/WI-MHDL-2021120235/2021	EPI_ISL_7829644	2021-11-20	North America / USA / Wisconsin / Milwaukee County	Human	Original	Illumina MiSeq	DRAGEN COVID lineage v3.5.5	AY.103	21J	Delta	GK	(N_G215C,NSP2_L274F,N_D63G,N_R203M,NSP12_G671S,NSP13_I334V,NS8_E19D,NSP13_T380I,NS3_S26L,NSP12_A529V,Spike_P681R,Spike_R158del,NS8_C25Y,NSP3_P1228L,NSP3_T64I,NS7a_V82A,NSP3_A488S,Spike_F157del,NSP4_T492I,NSP14_A394V,Spike_T19R,NS7a_T120I,N_D377Y,M_I82T,Spike_D950N,NS7b_T40I,NSP13_P77L,Spike_E156G,NSP3_P1469S,NSP6_T77A,NSP12_P323L,Spike_D614G,NSP4_V167L)
hCoV-19/USA/WI-MHDL-2021120194/2021	EPI_ISL_7478646	2021-11-20	North America / USA / Wisconsin / Milwaukee County	Human	Original	Nanopore Clear Dx	BIP-WV6	AY.25	21J	Delta	GK	(N_G215C,N_D63G,N_R203M,NSP12_G671S,NS3_S26L,Spike_P681R,Spike_R158del,NSP3_P1228L,NS7a_V82A,Spike_F157del,NSP3_A488S,NSP4_T492I,NSP14_A394V,Spike_T19R,NS7a_T120I,N_D377Y,M_I82T,Spike_D950N,NS7b_T40I,NSP13_P77L,Spike_E156G,NSP3_P1469S,Spike_T478K,NSP6_T77A,NS3_E239Q,NS6_T21A,NSP12_P323L,Spike_D614G,NSP4_V167L,Spike_L452R,Spike_A522V)
hCoV-19/USA/WI-MHDL-2021120193/2021	EPI_ISL_7478649	2021-11-20	North America / USA / Wisconsin / Milwaukee County	Human	Original	Nanopore Clear Dx	BIP-WV6	AY.25	21J	Delta	GK	(NS7a_K53del,N_G215C,N_D63G,N_R203M,NSP12_G671S,NS3_S26L,Spike_P681R,NSP3_P1228L,NSP15_D272Y,NS6_W27L,NS7a_A55del,NS7a_V82A,NS7a_D51del,NSP3_A488S,NSP4_T492I,NS7a_F54del,NSP14_A394V,Spike_T19R,NS7a_T120I,NSP3_S211G,NSP3_A41V,NS7a_N52del,N_D377Y,M_I82T,Spike_D950N,NS7b_T40I,NSP13_P77L,NSP3_P1469S,Spike_T478K,NSP6_T77A,NS3_E239Q,NSP9_R39K,NSP12_P323L,Spike_D614G,NSP4_V167L,Spike_L452R)
hCoV-19/USA/WI-MHDL-2021120236/2021	EPI_ISL_7828314	2021-11-22	North America / USA / Wisconsin / Milwaukee County	Human	Original	Illumina MiSeq	DRAGEN COVID lineage v3.5.5	AY.39	21J	Delta	GK	(N_G215C,Spike_T95I,N_D63G,N_R203M,NSP3_K1679N,NSP12_G671S,NSP16_Q238H,NS3_S26L,Spike_P681R,Spike_R158del,NSP3_P1228L,NSP3_L71S,NS7a_V82A,NSP3_A488S,Spike_F157del,NSP4_T492I,NSP14_A394V,Spike_T19R,NS7a_T120I,N_D377Y,M_I82T,Spike_D950N,NS7b_T40I,NSP13_P77L,Spike_E156G,NSP3_P1469S,Spike_T478K,NS7a_V71I,NSP6_T77A,NSP12_P323L,NSP3_K280N,Spike_D614G,NSP4_V167L,Spike_L452R,NSP4_T295I)
hCoV-19/USA/WI-MHDL-2021120246/2021	EPI_ISL_7828322	2021-11-22	North America / USA / Wisconsin / Waukesha County	Human	Original	Illumina MiSeq	DRAGEN COVID lineage v3.5.5	AY.39	21J	Delta	GK	(N_G215C,N_D63G,N_R203M,NSP12_G671S,NSP16_Q238H,NSP3_E195D,NS3_S26L,Spike_P681R,Spike_R158del,NSP3_P1228L,NS7a_V82A,NSP3_A488S,Spike_F157del,NSP4_T492I,NSP14_A394V,Spike_T19R,NS7a_T120I,N_D377Y,M_I82T,Spike_D950N,NS7b_T40I,NSP13_P77L,Spike_E156G,NSP3_P1469S,Spike_T478K,NSP3_V325F,NS7a_V71I,NSP6_T77A,NSP12_P323L,Spike_D614G,NSP4_V167L,Spike_L452R)
hCoV-19/USA/WI-MHDL-2021120247/2021	EPI_ISL_7828323	2021-11-22	North America / USA / Wisconsin / Milwaukee County	Human	Original	Illumina MiSeq	DRAGEN COVID lineage v3.5.5	AY.103	21J	Delta	GK	(N_G215C,N_D63G,N_R203M,NSP12_G671S,NSP13_I334V,NSP2_P129L,NS3_S26L,Spike_P681R,Spike_R158del,NS8_C25Y,NSP3_P1228L,NS7a_V82A,NSP3_A488S,Spike_F157del,NSP4_T492I,NSP14_A394V,Spike_T19R,NS7a_T120I,N_D377Y,M_I82T,Spike_D950N,NS7b_T40I,NSP13_P77L,Spike_H49Y,Spike_E156G,NSP3_P1469S,Spike_T478K,NSP6_T77A,NSP12_P323L,Spike_D614G,NSP4_V167L,Spike_L452R)
hCoV-19/USA/WI-MHDL-2021120252/2021	EPI_ISL_7828328	2021-11-22	North America / USA / Wisconsin / Milwaukee County	Human	Original	Illumina MiSeq	DRAGEN COVID lineage v3.5.5	AY.103	21J	Delta	GK	(N_G215C,N_D63G,N_R203M,NSP12_G671S,NSP13_I334V,NSP14_T372I,NS3_S26L,NSP8_P178H,Spike_P681R,Spike_R158del,NSP3_P1228L,NS7a_V82A,NSP3_A488S,Spike_F157del,NSP4_T492I,NSP14_A394V,Spike_T19R,NS7a_T120I,N_D377Y,M_I82T,Spike_D950N,NS7b_T40I,NSP13_P77L,Spike_E156G,NSP3_P1469S,NSP3_K462N,Spike_T478K,NSP6_T77A,NSP12_P323L,Spike_D614G,NSP4_V167L,Spike_L452R,NSP3_L1126S)
hCoV-19/USA/WI-MHDL-2021120253/2021	EPI_ISL_7828329	2021-11-22	North America / USA / Wisconsin / Milwaukee County	Human	Original	Illumina MiSeq	DRAGEN COVID lineage v3.5.5	AY.44	21J	Delta	GK	(Spike_H69del,N_G215C,NS8_L60F,N_D63G,N_R203M,NSP12_G671S,NS3_S26L,Spike_P681R,Spike_R158del,NSP3_P1228L,NS7a_V82A,NSP3_A488S,Spike_F157del,NSP4_T492I,NSP14_A394V,Spike_T19R,NS7a_T120I,NSP12_F192V,N_D377Y,NSP13_H164Y,M_I82T,Spike_D950N,NS7b_T40I,NSP3_A1736V,NSP13_P77L,Spike_E156G,NSP3_H1307Y,NSP3_P1469S,Spike_T478K,Spike_V70del,NSP6_T77A,NSP12_P323L,Spike_D614G,NSP4_V167L,Spike_L452R)
hCoV-19/USA/WI-MHDL-2021120254/2021	EPI_ISL_7828330	2021-11-22	North America / USA / Wisconsin / Milwaukee County	Human	Original	Illumina MiSeq	DRAGEN COVID lineage v3.5.5	AY.37	21I	Delta	GV	(NSP3_I1021V,N_D63G,N_R203M,NSP4_R401H,NSP12_G671S,NSP6_T181I,NS3_S26L,Spike_P681R,Spike_R158del,N_P122L,NS7a_V82A,Spike_F157del,Spike_T19R,NS7a_T120I,Spike_A222V,N_D377Y,M_I82T,NSP6_V149A,NSP15_P205S,NSP2_E460D,Spike_D950N,NSP3_P822L,NSP13_P77L,Spike_V367L,Spike_E156G,NSP4_A446V,Spike_T478K,NSP14_P43L,NSP12_P323L,Spike_D614G)
hCoV-19/USA/WI-MHDL-2021120255/2021	EPI_ISL_7828331	2021-11-22	North America / USA / Wisconsin / Milwaukee County	Human	Original	Illumina MiSeq	DRAGEN COVID lineage v3.5.5	AY.103	21J	Delta	GK	(N_G215C,N_D63G,N_R203M,NSP12_G671S,NSP13_I334V,NSP14_T372I,NS3_S26L,NSP8_P178H,Spike_P681R,NSP3_P1228L,NSP3_A488S,NSP4_T492I,NSP14_A394V,Spike_T19R,N_D377Y,M_I82T,Spike_D950N,NS7b_T40I,NSP13_P77L,NSP3_K462N,NSP6_T77A,NSP12_P323L,Spike_D614G,NSP4_V167L,NSP3_L1126S)
hCoV-19/USA/WI-MHDL-2021120256/2021	EPI_ISL_7828332	2021-11-22	North America / USA / Wisconsin / Milwaukee County	Human	Original	Illumina MiSeq	DRAGEN COVID lineage v3.5.5	AY.103	21J	Delta	GK	(N_G215C,N_D63G,N_R203M,NSP12_G671S,NSP13_I334V,NS3_S26L,Spike_P681R,Spike_R158del,NSP3_P1228L,NS7a_V82A,NSP3_A488S,Spike_F157del,NS8_P36S,NSP4_T492I,Spike_S640F,NSP14_A394V,Spike_T19R,NS7a_T120I,N_D377Y,M_I82T,Spike_D950N,NS7b_T40I,NSP13_P77L,Spike_E156G,NSP3_P1469S,NSP3_S1877N,Spike_T478K,NSP6_T77A,NSP12_P323L,Spike_D614G,NSP4_V167L,Spike_L452R)
hCoV-19/USA/WI-MHDL-2021120257/2021	EPI_ISL_7828333	2021-11-22	North America / USA / Wisconsin / Milwaukee County	Human	Original	Illumina MiSeq	DRAGEN COVID lineage v3.5.5	AY.103	21J	Delta	GK	(N_G215C,N_D63G,N_R203M,NSP12_G671S,NSP13_I334V,NSP14_T372I,NS3_S26L,NSP8_P178H,Spike_P681R,Spike_R158del,NSP3_P1228L,NS7a_V82A,NSP3_A488S,Spike_F157del,NSP4_T492I,NSP14_A394V,Spike_T19R,NS7a_T120I,N_D377Y,M_I82T,Spike_D950N,NS7b_T40I,NSP13_P77L,Spike_E156G,NSP2_E373K,NSP3_P1469S,NSP3_K462N,Spike_T478K,NSP6_T77A,NSP12_P323L,Spike_D614G,NSP4_V167L,Spike_L452R,NSP3_L1126S)
hCoV-19/USA/WI-MHDL-2021120261/2021	EPI_ISL_7828334	2021-11-22	North America / USA / Wisconsin / Waukesha County	Human	Original	Illumina MiSeq	DRAGEN COVID lineage v3.5.5	AY.103	21J	Delta	GK	(N_G215C,N_D63G,N_R203M,NSP12_G671S,NSP13_I334V,NS3_S26L,Spike_P681R,Spike_R158del,NSP3_P1228L,NS7a_V82A,NSP3_A488S,Spike_F157del,NSP4_T492I,NSP14_A394V,Spike_T19R,NS7a_T120I,N_D377Y,M_I82T,Spike_D950N,NS7b_T40I,NSP13_P77L,Spike_E156G,NSP3_P1469S,Spike_A623V,NSP6_T77A,NSP12_P323L,Spike_D614G,NSP4_V167L)
hCoV-19/USA/WI-MHDL-2021120262/2021	EPI_ISL_7828335	2021-11-22	North America / USA / Wisconsin / Kenosha County	Human	Original	Illumina MiSeq	DRAGEN COVID lineage v3.5.5	AY.103	21J	Delta	GK	(N_G215C,N_D63G,NSP2_L428S,N_R203M,NSP12_G671S,NSP13_I334V,NS3_S26L,Spike_P681R,NSP3_P1228L,NSP3_A488S,NSP4_T492I,NSP14_A394V,Spike_T19R,N_D377Y,M_I82T,Spike_D950N,NS7b_T40I,NSP13_P77L,NSP3_P1469S,NSP6_T77A,NSP12_P323L,Spike_D614G,NSP4_V167L)
hCoV-19/USA/WI-MHDL-2021120264/2021	EPI_ISL_7828336	2021-11-22	North America / USA / Wisconsin / Milwaukee County	Human	Original	Illumina MiSeq	DRAGEN COVID lineage v3.5.5	AY.37	21I	Delta	GK	(N_D63G,N_R203M,NSP4_R401H,NSP12_G671S,NSP6_T181I,NS3_S26L,Spike_P681R,Spike_R158del,N_P122L,NS7a_V82A,Spike_F157del,Spike_T19R,NS7a_T120I,Spike_A222V,N_D377Y,M_I82T,NSP6_V149A,NSP15_P205S,NSP2_E460D,Spike_D950N,NSP3_P822L,NSP13_P77L,Spike_V367L,Spike_E156G,NSP4_A446V,Spike_T478K,NSP14_P43L,NSP12_P323L,Spike_D614G,Spike_L452R)
hCoV-19/USA/WI-MHDL-2021120259/2021	EPI_ISL_7829645	2021-11-22	North America / USA / Wisconsin / Milwaukee County	Human	Original	Illumina MiSeq	DRAGEN COVID lineage v3.5.5	AY.44	21J	Delta	GK	(N_G215C,N_D63G,N_R203M,NSP12_G671S,N_R93L,NS3_S26L,Spike_P681R,Spike_R158del,NSP3_P1228L,NS7a_V82A,NSP3_A488S,Spike_F157del,NSP4_T492I,Spike_A688V,NSP14_A394V,Spike_T19R,NS7a_T120I,NSP12_F192V,N_D377Y,M_I82T,Spike_D950N,NS7b_T40I,NSP13_P77L,NSP2_T412I,Spike_E156G,NSP3_P1469S,NSP16_S98L,Spike_T478K,NSP6_T77A,NSP5_A260V,NSP12_P323L,NS8_Q72H,Spike_D614G,NSP4_V167L,Spike_L452R)
hCoV-19/USA/WI-MHDL-2021120029/2021	EPI_ISL_7153338	2021-11-22	North America / USA / Wisconsin / Milwaukee County	Human	Original	Nanopore Clear Dx	Medaka via artic 1.2.1	AY.25	21J	Delta	GK	(N_G215C,N_D63G,N_R203M,NSP12_G671S,Spike_G142D,NS3_S26L,Spike_P681R,Spike_R158del,Spike_Y269H,NSP3_P1228L,NS7a_V82A,NSP3_A488S,Spike_F157del,NSP4_T492I,NSP14_A394V,Spike_T19R,NS7a_T120I,N_D377Y,M_I82T,Spike_D950N,Spike_S112L,NS7b_T40I,NSP13_P77L,Spike_E156G,NSP3_P1469S,Spike_T478K,NSP6_T77A,NS3_E239Q,NSP12_P323L,Spike_D614G,NSP4_V167L,Spike_L452R,NSP4_T295I)
hCoV-19/USA/WI-MHDL-2021120041/2021	EPI_ISL_7281444	2021-11-22	North America / USA / Wisconsin / Milwaukee County	Human	Original	Nanopore Clear Dx	BIP-WV6	AY.103	21J	Delta	GK	(N_G215C,N_D63G,N_R203M,NSP12_G671S,NSP13_I334V,NS3_S26L,Spike_P681R,Spike_R158del,NSP9_G37R,NS8_C25Y,NSP3_P1228L,NS7a_V82A,NSP3_A488S,Spike_F157del,NSP4_T492I,NSP14_A394V,Spike_T19R,NS7a_T120I,NSP15_G150V,N_D377Y,M_I82T,Spike_D950N,NS7b_T40I,NSP13_P77L,Spike_E156G,NSP3_P1469S,Spike_T478K,NSP6_T77A,NSP12_P323L,Spike_D614G,NSP4_V167L,Spike_L452R,NSP3_S699F)
hCoV-19/USA/WI-MHDL-2021120176/2021	EPI_ISL_7478626	2021-11-22	North America / USA / Wisconsin / Milwaukee County	Human	Original	Nanopore Clear Dx	BIP-WV6	AY.44	21J	Delta	GK	(NSP13_S166L,N_G215C,NS8_L60F,N_D63G,N_R203M,NSP12_G671S,NSP6_A46V,NS3_S26L,Spike_P681R,Spike_R158del,NSP3_P1228L,NS7a_V82A,NSP3_A488S,Spike_F157del,NSP4_T492I,NSP13_V247F,NSP14_A394V,Spike_T19R,NS7a_T120I,NSP12_F192V,N_D377Y,NSP13_H164Y,M_I82T,Spike_D950N,NS7b_T40I,NSP3_A1736V,NSP13_P77L,Spike_E156G,NSP3_H1307Y,NSP3_P1469S,Spike_T478K,NSP6_T77A,NSP12_P323L,Spike_D614G,NSP4_V167L,Spike_L452R,Spik…
hCoV-19/USA/WI-MHDL-2021120179/2021	EPI_ISL_7478627	2021-11-22	North America / USA / Wisconsin / Waukesha County	Human	Original	Nanopore Clear Dx	BIP-WV6	AY.25.1	21J	Delta	GK	(N_G215C,N_D63G,N_R203M,NSP12_G671S,NS3_S26L,Spike_L5F,Spike_P681R,Spike_R158del,NSP3_P1228L,NSP4_T28A,NS7a_V82A,NSP3_A488S,Spike_F157del,NSP4_T492I,NSP14_A394V,Spike_T19R,NS7a_T120I,NSP2_N130S,N_D377Y,M_I82T,NSP6_C197F,Spike_D950N,NS7b_T40I,NSP13_P77L,NSP4_A472V,Spike_E156G,NSP3_P1469S,Spike_T478K,NSP6_T77A,NS3_E239Q,NSP12_P323L,Spike_D614G,NSP4_V167L,Spike_L452R,NSP3_D410G)
hCoV-19/USA/WI-MHDL-2021120181/2021	EPI_ISL_7478628	2021-11-22	North America / USA / Wisconsin / Milwaukee County	Human	Original	Nanopore Clear Dx	BIP-WV6	AY.44	21J	Delta	GK	(N_G215C,NS8_L60F,NSP2_E201K,N_R203M,NSP12_G671S,NS3_S26L,Spike_P681R,Spike_R158del,NSP3_P1228L,NSP14_V125I,NS7a_V82A,NSP3_A488S,Spike_F157del,NSP4_T492I,NSP14_A394V,Spike_T19R,NS7a_T120I,NSP12_F192V,N_D377Y,NSP13_H164Y,M_I82T,Spike_D950N,NS7b_T40I,NSP3_A1736V,NSP13_P77L,Spike_E156G,NSP3_H1307Y,NSP3_P1469S,Spike_T478K,NS3_T175I,NSP6_T77A,N_D63S,NSP12_P323L,Spike_D614G,NSP3_T1250P,NSP4_V167L,Spike…
hCoV-19/USA/WI-MHDL-2021120183/2021	EPI_ISL_7478629	2021-11-22	North America / USA / Wisconsin / Milwaukee County	Human	Original	Nanopore Clear Dx	BIP-WV6	AY.103	21J	Delta	GK	(Spike_E484Q,N_G215C,N_D63G,NSP2_V157F,N_R203M,NSP12_G671S,NSP13_I334V,NSP3_A58T,NS3_S26L,Spike_P681R,Spike_R158del,NSP3_P1228L,NS7a_V82A,NSP3_A488S,Spike_F157del,NSP4_T492I,NSP14_A394V,Spike_T19R,NS7a_T120I,N_D377Y,M_I82T,Spike_D950N,NS7b_T40I,NSP13_P77L,Spike_E156G,NSP3_P1469S,NSP2_A26V,Spike_T478K,NSP6_T77A,NSP12_P323L,Spike_D614G,NSP4_V167L,Spike_L452R,NSP2_Q376K,NSP3_S1843F)
hCoV-19/USA/WI-MHDL-2021120184/2021	EPI_ISL_7478630	2021-11-22	North America / USA / Wisconsin / Milwaukee County	Human	Original	Nanopore Clear Dx	BIP-WV6	AY.103	21J	Delta	GK	(N_G215C,N_D63G,NSP2_C177S,N_R203M,NSP12_G671S,NSP13_I334V,NS3_S26L,Spike_P681R,Spike_R158del,NSP3_P1228L,NS7a_V82A,NSP3_A488S,Spike_F157del,NSP4_T492I,NSP14_A394V,Spike_T19R,NS7a_T120I,N_D377Y,M_I82T,Spike_D950N,NS7b_T40I,NSP13_P77L,Spike_E156G,NSP3_P1469S,Spike_T478K,NSP14_S357I,NSP3_N354S,NSP6_T77A,NSP12_P323L,Spike_D614G,NSP4_V167L,Spike_L452R,NSP4_G178S)
hCoV-19/USA/WI-MHDL-2021120187/2021	EPI_ISL_7478631	2021-11-22	North America / USA / Wisconsin / Milwaukee County	Human	Original	Nanopore Clear Dx	BIP-WV6	AY.25.1	21J	Delta	GK	(N_G215C,NSP2_P91S,N_D63G,N_R203M,NSP12_G671S,NS3_S26L,Spike_P681R,Spike_R158del,NSP3_P1228L,NS7a_V82A,NSP3_A488S,Spike_F157del,NSP4_T492I,NSP14_A394V,Spike_T19R,NS7a_T120I,N_D377Y,M_I82T,NSP2_E587K,NSP6_C197F,Spike_D950N,NS7b_T40I,NSP13_P77L,Spike_E156G,NSP13_P300S,NSP3_P1469S,Spike_T478K,NSP6_T77A,NS3_E239Q,NSP12_P323L,Spike_D614G,NSP4_V167L,Spike_L452R,NSP3_D410G)
hCoV-19/USA/WI-MHDL-2021120188/2021	EPI_ISL_7478632	2021-11-22	North America / USA / Wisconsin / Milwaukee County	Human	Original	Nanopore Clear Dx	BIP-WV6	AY.103	21J	Delta	GK	(N_G215C,N_D63G,N_R203M,NSP12_G671S,NSP13_I334V,NSP14_T372I,NS3_S26L,NSP8_P178H,Spike_P681R,Spike_R158del,NSP3_P1228L,NS7a_V82A,NSP3_A488S,Spike_F157del,NSP4_T492I,NSP14_A394V,Spike_T19R,NS7a_T120I,N_D377Y,M_I82T,Spike_D950N,NS7b_T40I,NSP13_P77L,Spike_E156G,NSP3_P1469S,NSP3_K462N,Spike_T478K,NSP6_T77A,NSP12_P323L,Spike_D614G,NSP4_V167L,Spike_L452R,NSP3_L1126S)
hCoV-19/USA/WI-MHDL-2021120189/2021	EPI_ISL_7478633	2021-11-22	North America / USA / Wisconsin / Milwaukee County	Human	Original	Nanopore Clear Dx	BIP-WV6	AY.25	21J	Delta	GK	(N_G215C,N_D63G,N_R203M,NSP12_G671S,Spike_G142D,NS3_G251V,NS3_S26L,Spike_P681R,Spike_R158del,NSP3_P1228L,NS7a_V82A,NSP3_A488S,Spike_F157del,NSP4_T492I,NSP14_A394V,Spike_T19R,NS7a_T120I,N_D377Y,M_I82T,Spike_D950N,Spike_S112L,NS7b_T40I,NSP13_P77L,Spike_E156G,M_T30I,NSP3_P1469S,Spike_T478K,NSP6_T77A,NS3_E239Q,NSP12_P323L,Spike_D614G,NSP4_V167L,Spike_L452R)
hCoV-19/USA/WI-MHDL-2021120190/2021	EPI_ISL_7478634	2021-11-22	North America / USA / Wisconsin / Milwaukee County	Human	Original	Nanopore Clear Dx	BIP-WV6	AY.103	21J	Delta	GK	(N_G215C,N_D63G,N_R203M,NSP12_G671S,NSP13_I334V,NS3_S26L,Spike_P681R,Spike_R158del,NSP3_P1228L,NS7a_V82A,NS8_R115C,NSP3_A488S,Spike_F157del,NSP4_T492I,NSP14_A394V,Spike_T19R,NS7a_T120I,Spike_Q613H,NSP14_F89L,N_D377Y,M_I82T,Spike_D950N,NS7b_T40I,NSP13_P77L,NSP13_V340L,Spike_E156G,NSP3_P1469S,Spike_T478K,NSP13_T255I,NSP6_T77A,NSP12_P323L,Spike_D614G,NSP4_V167L,Spike_L452R)
hCoV-19/USA/WI-MHDL-2021120191/2021	EPI_ISL_7478635	2021-11-22	North America / USA / Wisconsin / Milwaukee County	Human	Original	Nanopore Clear Dx	BIP-WV6	AY.3	21J	Delta	GK	(N_G215C,N_D63G,N_R203M,NSP2_G262D,NSP12_G671S,NSP6_I162V,NS3_W131C,NS3_S26L,Spike_P681R,Spike_R158del,NSP3_P1228L,NS8_A65S,NS7a_V82A,NSP3_A488S,Spike_F157del,NSP4_T492I,NSP14_A394V,Spike_T19R,NS7a_T120I,NSP14_A360V,N_D377Y,M_I82T,Spike_D950N,NS7b_T40I,NSP13_P77L,Spike_E156G,NSP3_P1469S,Spike_T478K,NSP12_P830S,NSP6_T77A,NSP12_P323L,Spike_D614G,NSP4_V167L,Spike_L452R,N_L139S)
hCoV-19/USA/WI-MHDL-2021120185/2021	EPI_ISL_7478640	2021-11-22	North America / USA / Wisconsin / Milwaukee County	Human	Original	Nanopore Clear Dx	BIP-WV6	AY.118	21J	Delta	GK	(N_G215C,N_D63G,NS8_G77C,N_R203M,NSP12_G671S,NS3_S26L,Spike_P681R,NSP3_P1228L,NS7a_V82A,NSP3_A488S,NSP4_T492I,NSP14_A394V,Spike_T19R,NS7a_T120I,N_D377Y,Spike_M902I,Spike_D950N,NS7b_T40I,NSP13_P77L,NSP3_P1469S,Spike_T478K,NSP12_L638F,NSP6_T77A,NSP12_P323L,Spike_D614G,Spike_L452R,NSP4_V167L)
hCoV-19/USA/WI-MHDL-2021120178/2021	EPI_ISL_7478642	2021-11-22	North America / USA / Wisconsin / Milwaukee County	Human	Original	Nanopore Clear Dx	BIP-WV6	AY.26	21I	Delta	GK	(Spike_V1264L,NSP2_T3I,N_D63G,N_R203M,NSP12_G671S,Spike_N1074S,NS6_K48N,NSP6_T181I,NS3_S26L,Spike_P681R,Spike_R158del,NS7a_V82A,Spike_F157del,Spike_T19R,NS7a_T120I,Spike_A222V,NSP1_F143del,N_D377Y,M_I82T,NSP6_V149A,Spike_D950N,NSP3_P822L,NSP13_P77L,NSP1_K141del,Spike_E156G,NSP1_S142del,NSP4_A446V,Spike_T478K,NSP12_P323L,Spike_D614G,Spike_L452R)
hCoV-19/USA/WI-MHDL-2021120192/2021	EPI_ISL_7478643	2021-11-22	North America / USA / Wisconsin / Milwaukee County	Human	Original	Nanopore Clear Dx	BIP-WV6	AY.44	21J	Delta	GK	(N_G215C,N_D63G,N_R203M,NSP12_G671S,NS3_S26L,Spike_P681R,Spike_R158del,NSP3_P1228L,NS7a_V82A,NSP3_A488S,Spike_F157del,NSP4_T492I,NSP14_A394V,Spike_T19R,NS7a_T120I,NSP12_F192V,N_D377Y,NSP3_A1766V,M_I82T,Spike_D950N,NS7b_T40I,NSP13_P77L,Spike_E156G,NSP3_P1469S,Spike_T478K,NSP6_T77A,Spike_G1219C,NSP3_S1588L,NSP12_P323L,Spike_D614G,Spike_C1243F,NSP4_V167L,Spike_L452R,NSP3_A534V)
hCoV-19/USA/WI-MHDL-2021120186/2021	EPI_ISL_7478645	2021-11-22	North America / USA / Wisconsin / Milwaukee County	Human	Original	Nanopore Clear Dx	BIP-WV6	AY.44	21J	Delta	GK	(N_G215C,N_D63G,N_R203M,NSP12_G671S,NS3_S26L,Spike_P681R,Spike_R158del,NSP3_P1228L,NS7a_V82A,NSP3_A488S,Spike_F157del,NSP4_T492I,NSP14_A394V,Spike_T19R,NS7a_T120I,NSP12_F192V,N_D377Y,M_I82T,Spike_D950N,NS7b_T40I,NSP3_A1736V,NSP13_P77L,Spike_E156G,NSP3_P1469S,Spike_T478K,NSP6_T77A,NSP12_P323L,Spike_D614G,Spike_L452R,NSP4_V167L)
hCoV-19/USA/WI-MHDL-2021120180/2021	EPI_ISL_7478647	2021-11-22	North America / USA / Wisconsin / Milwaukee County	Human	Original	Nanopore Clear Dx	BIP-WV6	AY.3.1	21J	Delta	GK	(N_G215C,N_D63G,N_R203M,NSP14_H26Y,NSP12_G671S,NSP6_I162V,NS3_S26L,Spike_P681R,Spike_R158del,NSP3_P1228L,NS7a_V82A,NSP3_A488S,Spike_F157del,NSP4_T492I,NSP14_A394V,Spike_T19R,NS7a_T120I,N_D377Y,M_I82T,Spike_D950N,NS7b_T40I,Spike_K795E,NSP13_P77L,Spike_E156G,NSP3_P1469S,Spike_T478K,NSP6_T77A,NSP5_A193S,NSP3_D309Y,NSP1_P80L,NSP12_P323L,Spike_D614G,NSP4_V167L,Spike_L452R)
hCoV-19/USA/WI-MHDL-2021120182/2021	EPI_ISL_7478650	2021-11-22	North America / USA / Wisconsin / Milwaukee County	Human	Original	Nanopore Clear Dx	BIP-WV6	AY.3.1	21J	Delta	GK	(N_D63G,NSP14_H26Y,NSP12_G671S,NSP6_I162V,NS3_S26L,Spike_P681R,Spike_R158del,NSP3_P1228L,NSP3_L499F,NS7a_V82A,NSP3_A488S,Spike_F157del,NSP4_T492I,NSP14_A394V,Spike_T19R,NS7a_T120I,N_D377Y,M_I82T,Spike_D950N,NS7b_T40I,NSP13_P77L,Spike_E156G,NSP3_P1469S,Spike_T478K,NSP6_T77A,NSP5_A193S,NSP3_D309Y,NSP1_P80L,NSP12_P323L,Spike_D614G,NSP4_V167L,Spike_L452R)
hCoV-19/USA/WI-MHDL-2021120170/2021	EPI_ISL_7478651	2021-11-22	North America / USA / Wisconsin / Milwaukee County	Human	Original	Nanopore Clear Dx	BIP-WV6	AY.3	21J	Delta	GK	(N_D63G,NSP12_S325I,NSP12_G671S,NSP6_I162V,NS3_S26L,Spike_P681R,NSP3_P1228L,NS7a_V82A,NSP3_A488S,NSP4_T492I,NSP14_A394V,Spike_T19R,NS7a_T120I,N_D377Y,M_I82T,Spike_D950N,NS7b_T40I,NSP12_A16V,NSP13_P77L,NSP3_P1469S,Spike_T478K,NSP6_T77A,NSP6_F184V,NSP12_P323L,Spike_D614G,Spike_L452R,NSP4_V167L)
hCoV-19/USA/WI-MHDL-2021120128/2021	EPI_ISL_7809482	2021-11-23	North America / USA / Wisconsin / Milwaukee County	Human	Original	Illumina MiSeq	DRAGEN COVID lineage v3.5.4	AY.103	21J	Delta	GK	(N_G215C,N_D63G,N_R203M,NSP12_G671S,NSP13_I334V,NS3_S26L,Spike_K182I,NSP8_P178H,NSP12_L869F,Spike_P681R,Spike_R158del,NSP3_P1228L,NSP3_A488S,Spike_F157del,NSP4_T492I,NSP14_A394V,Spike_T19R,NS7a_T120I,NSP12_P227L,N_D377Y,M_I82T,Spike_D950N,NS7b_T40I,NSP13_P77L,Spike_E156G,NSP3_P1469S,Spike_T478K,NSP6_T77A,NSP12_P323L,Spike_D614G,NSP4_V167L,Spike_L452R)
hCoV-19/USA/WI-MHDL-2021120129/2021	EPI_ISL_7809483	2021-11-23	North America / USA / Wisconsin / Milwaukee County	Human	Original	Illumina MiSeq	DRAGEN COVID lineage v3.5.4	AY.103	21J	Delta	GK	(N_G215C,N_D63G,NSP2_C177S,N_R203M,NSP12_G671S,NSP13_I334V,NS3_S26L,NS3_W69C,Spike_P681R,Spike_R158del,NSP3_P1228L,NS7a_V82A,NSP3_A488S,Spike_F157del,NSP4_T492I,NSP14_A394V,Spike_T19R,NS7a_T120I,N_D377Y,M_I82T,Spike_D950N,NS7b_T40I,NSP13_P77L,Spike_E156G,NSP3_P1469S,Spike_T478K,NSP3_N354S,NSP6_T77A,NSP12_P323L,Spike_D614G,NSP4_V167L,Spike_L452R,NSP4_G178S)
hCoV-19/USA/WI-MHDL-2021120130/2021	EPI_ISL_7809484	2021-11-23	North America / USA / Wisconsin / Milwaukee County	Human	Original	Illumina MiSeq	DRAGEN COVID lineage v3.5.4	AY.103	21J	Delta	GK	(N_G215C,N_D63G,NSP2_C177S,N_R203M,NSP12_G671S,NSP13_I334V,NS3_S26L,Spike_P681R,Spike_R158del,NSP3_P1228L,NS7a_V82A,NSP3_A488S,Spike_F157del,NSP4_T492I,NSP14_A394V,Spike_T19R,NS7a_T120I,N_D377Y,M_I82T,Spike_D950N,NS7b_T40I,NSP13_P77L,Spike_E156G,NSP3_P1469S,Spike_T478K,NSP14_S357I,NSP6_T77A,NSP12_P323L,Spike_D614G,NSP4_V167L,Spike_L452R,NSP4_G178S)
hCoV-19/USA/WI-MHDL-2021120132/2021	EPI_ISL_7809485	2021-11-23	North America / USA / Wisconsin / Milwaukee County	Human	Original	Illumina MiSeq	DRAGEN COVID lineage v3.5.4	AY.103	21J	Delta	GK	(N_G215C,N_D63G,N_R203M,NSP12_G671S,NSP13_I334V,NSP6_H11Y,NS3_S26L,Spike_P681R,Spike_R158del,NSP3_P1228L,NSP3_A488S,Spike_F157del,NSP4_T492I,NSP14_A394V,Spike_T19R,NS7a_T120I,NS3_G44R,N_D377Y,M_I82T,Spike_D950N,NS7b_T40I,NSP13_P77L,Spike_E156G,NSP3_P1469S,Spike_A1078S,Spike_T478K,NSP6_T77A,NSP2_S351N,NSP12_P323L,Spike_D614G,NSP4_V167L,Spike_L452R,NSP16_T140I)
hCoV-19/USA/WI-MHDL-2021120133/2021	EPI_ISL_7809486	2021-11-23	North America / USA / Wisconsin / Milwaukee County	Human	Original	Illumina MiSeq	DRAGEN COVID lineage v3.5.4	AY.103	21J	Delta	GK	(N_G215C,N_D63G,N_R203M,NSP12_G671S,NSP13_I334V,NS3_S26L,NSP8_P178H,Spike_P681R,Spike_R158del,NSP3_P1228L,Spike_A684V,NS7a_V82A,NSP3_A488S,Spike_F157del,NSP4_T492I,Spike_T19R,NSP14_A394V,NS7a_T120I,N_D377Y,M_I82T,Spike_D950N,NS7b_T40I,NSP13_P77L,NSP15_S161I,Spike_E156G,NSP3_P1469S,Spike_T478K,NSP6_T77A,NSP12_P323L,Spike_D614G,NSP4_V167L,Spike_L452R,Spike_P26L)
hCoV-19/USA/WI-MHDL-2021120134/2021	EPI_ISL_7809487	2021-11-23	North America / USA / Wisconsin / Milwaukee County	Human	Original	Illumina MiSeq	DRAGEN COVID lineage v3.5.4	AY.103	21J	Delta	GK	(N_G215C,N_D63G,NSP2_C177S,N_R203M,NSP12_G671S,NSP13_I334V,NS3_S26L,NS3_W69C,Spike_P681R,Spike_R158del,NSP3_P1228L,NSP3_A488S,Spike_F157del,NSP4_T492I,NSP14_A394V,Spike_T19R,NS7a_T120I,N_D377Y,M_I82T,Spike_D950N,NS7b_T40I,NSP13_P77L,Spike_E156G,NSP3_P1469S,Spike_T478K,NSP6_T77A,NSP12_P323L,Spike_D614G,NSP4_V167L,Spike_L452R,NSP4_G178S)
hCoV-19/USA/WI-MHDL-2021120135/2021	EPI_ISL_7809488	2021-11-23	North America / USA / Wisconsin / Milwaukee County	Human	Original	Illumina MiSeq	DRAGEN COVID lineage v3.5.4	AY.103	21J	Delta	GK	(N_G215C,N_D63G,N_R203M,NSP12_G671S,NSP13_I334V,NSP2_P129L,NS3_S26L,Spike_P681R,Spike_R158del,NS8_C25Y,NSP3_P1228L,NS7a_V82A,NSP3_A488S,Spike_F157del,NSP4_T492I,NSP14_A394V,Spike_T19R,N_D377Y,M_I82T,Spike_D950N,NS7b_T40I,NSP13_P77L,Spike_H49Y,Spike_E156G,NSP3_P1469S,Spike_T478K,NSP6_T77A,NSP12_P323L,Spike_D614G,NSP4_V167L,Spike_L452R)
hCoV-19/USA/WI-MHDL-2021120241/2021	EPI_ISL_7828318	2021-11-23	North America / USA / Wisconsin / Milwaukee County	Human	Original	Illumina MiSeq	DRAGEN COVID lineage v3.5.5	AY.103	21J	Delta	GK	(N_G215C,N_D63G,N_A208S,N_R203M,NS7a_D69del,NS7a_Q76del,NSP12_G671S,NSP13_I334V,NS7a_L77del,NS3_P104S,NS3_S26L,Spike_P681R,Spike_R158del,NSP3_P1228L,NS7a_Y75del,NS7a_V71del,NS7a_V82A,NS7a_K72del,NSP3_A488S,Spike_F157del,NSP4_T492I,NSP14_A394V,Spike_T19R,NS7a_T120I,NS7a_F63del,NS7a_G70del,N_D377Y,M_I82T,NS7a_P68del,Spike_D950N,NSP3_A1215V,NS7b_T40I,NS7a_H73del,NSP13_P77L,NS7a_A66del,Spike_E156G,NS…
hCoV-19/USA/WI-MHDL-2021120242/2021	EPI_ISL_7828319	2021-11-23	North America / USA / Wisconsin / Milwaukee County	Human	Original	Illumina MiSeq	DRAGEN COVID lineage v3.5.5	AY.44	21J	Delta	GK	(N_G215C,NS8_L60F,N_D63G,N_R203M,NSP12_G671S,NS3_S26L,Spike_P681R,Spike_R158del,NSP3_P1228L,NS7a_V82A,NSP3_A488S,Spike_F157del,NSP4_T492I,NSP14_A394V,Spike_T19R,NS7a_T120I,NSP12_F192V,N_D377Y,NSP13_H164Y,M_I82T,Spike_D950N,NS8_W45C,NS7b_T40I,NSP3_A1736V,NSP13_P77L,Spike_E156G,NSP3_H1307Y,NSP3_P1469S,NSP6_T77A,NSP12_P323L,Spike_D614G,NSP4_V167L)
hCoV-19/USA/WI-MHDL-2021120244/2021	EPI_ISL_7828320	2021-11-23	North America / USA / Wisconsin / Milwaukee County	Human	Original	Illumina MiSeq	DRAGEN COVID lineage v3.5.5	AY.103	21J	Delta	GK	(N_G215C,N_D63G,N_R203M,NSP12_G671S,NSP13_I334V,NSP2_E546S,NS3_S26L,Spike_P681R,Spike_R158del,NSP3_P1228L,NS7a_V82A,NSP2_E545D,NSP3_A488S,Spike_F157del,NSP4_T492I,NSP14_A394V,Spike_T19R,NS7a_T120I,N_D377Y,M_I82T,Spike_D950N,NS7b_T40I,NSP13_P77L,Spike_E156G,NSP3_P1867T,NSP3_P1469S,Spike_T478K,NSP6_T77A,NSP12_P323L,Spike_D614G,NSP4_V167L,Spike_L452R,NSP4_T295I)
hCoV-19/USA/WI-MHDL-2021120245/2021	EPI_ISL_7828321	2021-11-23	North America / USA / Wisconsin / Milwaukee County	Human	Original	Illumina MiSeq	DRAGEN COVID lineage v3.5.5	AY.44	21J	Delta	GK	(N_G215C,NS8_L60F,N_D63G,N_R203M,NSP12_G671S,NSP3_E1394D,NS3_S26L,Spike_P681R,NSP3_P1228L,NSP3_A488S,NSP4_T492I,NSP14_A394V,Spike_T19R,NSP12_F192V,N_D377Y,M_I82T,NSP13_H164Y,Spike_D950N,NS7b_T40I,NSP3_A1736V,NSP13_P77L,NSP3_H1307Y,NSP6_T77A,NSP12_P323L,Spike_D614G,NSP4_V167L)
hCoV-19/USA/WI-MHDL-2021120249/2021	EPI_ISL_7828325	2021-11-23	North America / USA / Wisconsin / Milwaukee County	Human	Original	Illumina MiSeq	DRAGEN COVID lineage v3.5.5	AY.44	21J	Delta	GK	(N_G215C,NS8_L60F,N_D63G,N_R203M,NSP12_G671S,NS3_S26L,Spike_P681R,Spike_R158del,NSP3_P1228L,NS7a_V82A,NSP3_A488S,Spike_F157del,NSP4_T492I,NSP14_A394V,Spike_T19R,NS7a_T120I,NSP12_F192V,N_D377Y,NSP13_H164Y,M_I82T,Spike_D950N,NS7b_T40I,NSP3_A1736V,NSP12_A16V,NSP13_P77L,Spike_E156G,NSP3_H1307Y,NSP3_P1469S,Spike_T478K,NSP6_T77A,NSP12_P323L,Spike_D614G,NSP4_V167L,Spike_L452R)
hCoV-19/USA/WI-MHDL-2021120250/2021	EPI_ISL_7828326	2021-11-23	North America / USA / Wisconsin / Milwaukee County	Human	Original	Illumina MiSeq	DRAGEN COVID lineage v3.5.5	AY.44	21J	Delta	GK	(N_G215C,NS8_L60F,N_D63G,N_R203M,NSP12_G671S,NS3_S26L,Spike_P681R,Spike_R158del,NSP3_P1228L,NS7a_V82A,NSP3_A488S,Spike_F157del,NSP4_T492I,NSP14_A394V,Spike_T19R,NS7a_T120I,NSP12_F192V,N_D377Y,NSP13_H164Y,M_I82T,Spike_D950N,NS7b_T40I,NSP3_A1736V,NSP12_A16V,NSP13_P77L,Spike_E156G,NSP3_H1307Y,NSP3_P1469S,Spike_T478K,NSP6_T77A,NSP12_P323L,Spike_D614G,NSP4_V167L,Spike_L452R)
hCoV-19/USA/WI-MHDL-2021120251/2021	EPI_ISL_7828327	2021-11-23	North America / USA / Wisconsin / Milwaukee County	Human	Original	Illumina MiSeq	DRAGEN COVID lineage v3.5.5	AY.44	21J	Delta	GK	(N_G215C,NS8_L60F,NSP2_E201K,N_R203M,NSP12_G671S,NS3_S26L,Spike_P681R,Spike_R158del,NSP3_P1228L,NSP14_V125I,NSP1_E176K,NS7a_V82A,NSP3_A488S,Spike_F157del,NSP4_T492I,NSP14_A394V,Spike_T19R,NS7a_T120I,NSP12_F192V,N_D377Y,NSP13_H164Y,M_I82T,Spike_D950N,NS7b_T40I,NSP3_A1736V,NSP2_R4S,NSP13_P77L,Spike_E156G,NSP3_H1307Y,NSP3_P1469S,Spike_T478K,NS3_T175I,NSP6_T77A,N_D63S,NSP12_P323L,Spike_D614G,NSP3_T12…
hCoV-19/USA/WI-MHDL-2021120043/2021	EPI_ISL_7281460	2021-11-23	North America / USA / Wisconsin / Milwaukee County	Human	Original	Nanopore Clear Dx	BIP-WV6	AY.39	21J	Delta	GK	(NSP4_V99M,N_G215C,NSP4_S34F,N_D63G,N_R203M,NSP12_G671S,NSP16_Q238H,NSP12_H613Y,NSP3_E195D,NS3_S26L,Spike_P681R,Spike_R158del,NSP3_P1228L,NS7a_V82A,NSP3_A488S,Spike_F157del,NSP4_T492I,NSP14_A394V,Spike_T19R,NS7a_T120I,N_D377Y,M_I82T,Spike_D950N,NSP3_G76D,NS7b_T40I,NSP2_A476S,NSP13_P77L,NS3_L52F,Spike_E156G,NS3_R68I,NSP3_P1469S,Spike_T478K,NS7a_V71I,NSP6_T77A,Spike_E654D,NSP12_P323L,Spike_D614G,NS…
hCoV-19/USA/WI-MHDL-2021120136/2021	EPI_ISL_7809489	2021-11-24	North America / USA / Wisconsin / Milwaukee County	Human	Original	Illumina MiSeq	DRAGEN COVID lineage v3.5.4	AY.44	21J	Delta	GK	(N_G215C,N_D63G,N_R203M,NSP12_G671S,Spike_G142D,NS3_W131C,NS3_S26L,Spike_P681R,Spike_R158del,NSP3_P1228L,NS7a_V82A,NSP3_A488S,Spike_F157del,NSP4_T492I,NSP14_A394V,Spike_T19R,NS7a_T120I,NSP12_F192V,N_D377Y,M_I82T,Spike_D950N,NS8_W45C,NS7b_T40I,NSP3_A1736V,NSP13_P77L,Spike_E156G,NSP3_P1469S,NSP12_G823C,Spike_T478K,NSP6_T77A,NSP12_T26I,NSP12_P323L,Spike_D614G,NSP4_V167L,Spike_L452R)
hCoV-19/USA/WI-MHDL-2021120137/2021	EPI_ISL_7809490	2021-11-24	North America / USA / Wisconsin / Milwaukee County	Human	Original	Illumina MiSeq	DRAGEN COVID lineage v3.5.4	AY.103	21J	Delta	GK	(N_G215C,N_D63G,N_R203M,NSP12_G671S,NSP13_I334V,NS3_V77F,NS3_S26L,Spike_P681R,Spike_R158del,NSP3_P1228L,NS7a_V82A,NSP3_A488S,Spike_F157del,NSP4_T492I,NSP14_A394V,Spike_T19R,NS7a_T120I,N_D377Y,NSP3_S794L,M_I82T,Spike_D950N,NS7b_T40I,NSP13_P77L,Spike_E156G,NSP3_P1469S,Spike_T478K,NSP6_T77A,NSP12_P323L,Spike_D614G,NSP4_V167L,Spike_L452R)
hCoV-19/USA/WI-MHDL-2021120138/2021	EPI_ISL_7809491	2021-11-24	North America / USA / Wisconsin / Milwaukee County	Human	Original	Illumina MiSeq	DRAGEN COVID lineage v3.5.4	AY.103	21J	Delta	GK	(NSP3_N618S,N_G215C,N_D63G,N_R203M,NSP12_G671S,NSP13_I334V,NS3_S26L,Spike_P681R,Spike_R158del,NSP3_P1228L,N_P364L,NSP3_A488S,Spike_F157del,NSP4_T492I,NSP14_A394V,Spike_T19R,NS7a_T120I,N_D377Y,M_I82T,Spike_D950N,NS7b_T40I,NSP13_P77L,Spike_E156G,NSP3_L738F,NSP3_P1469S,Spike_T478K,NSP6_T77A,NSP12_P323L,Spike_D614G,NSP4_V167L,Spike_L452R,NSP2_A294T)
hCoV-19/USA/WI-MHDL-2021120139/2021	EPI_ISL_7809492	2021-11-24	North America / USA / Wisconsin / Milwaukee County	Human	Original	Illumina MiSeq	DRAGEN COVID lineage v3.5.4	AY.44	21J	Delta	GK	(N_G215C,NS8_L60F,N_R203M,NSP12_G671S,NS3_S26L,Spike_P681R,Spike_R158del,NSP3_P1228L,NSP14_V125I,NSP4_L321I,NSP8_P178S,NS7a_V82A,NSP3_A488S,Spike_F157del,NSP4_T492I,NSP14_A394V,Spike_T19R,Spike_G1124V,NS7a_T120I,NSP12_F192V,N_D377Y,NSP13_H164Y,M_I82T,Spike_D950N,Spike_G1219V,NS7b_T40I,NSP3_A1736V,NSP13_P77L,Spike_E156G,NSP3_H1307Y,NSP3_P1469S,Spike_T478K,NSP6_T77A,N_D63S,NSP3_T1830I,NSP12_P323L,S…
hCoV-19/USA/WI-MHDL-2021120239/2021	EPI_ISL_7828317	2021-11-24	North America / USA / Wisconsin / Milwaukee County	Human	Original	Illumina MiSeq	DRAGEN COVID lineage v3.5.5	AY.103	21J	Delta	GK	(N_G215C,N_D63G,N_R203M,NS7a_T39I,NSP12_G671S,NSP13_I334V,NSP3_K1211N,NS3_S26L,Spike_P681R,Spike_R158del,NSP3_P1228L,Spike_V1068I,NS7a_V82A,NSP3_A488S,Spike_F157del,NSP4_T492I,NSP14_A394V,Spike_T19R,NS7a_T120I,N_D377Y,M_I82T,Spike_D950N,NS7b_T40I,NSP13_P77L,NSP3_V234I,Spike_E156G,NSP3_P1469S,Spike_T478K,NSP6_T77A,NSP12_P323L,Spike_D614G,NSP4_V167L,Spike_L452R)
hCoV-19/USA/WI-MHDL-2021120248/2021	EPI_ISL_7828324	2021-11-24	North America / USA / Wisconsin / Milwaukee County	Human	Original	Illumina MiSeq	DRAGEN COVID lineage v3.5.5	AY.103	21J	Delta	GK	(N_G215C,N_D63G,N_R203M,NSP12_G671S,NSP13_I334V,NS3_S26L,Spike_P681R,N_P207L,Spike_R158del,NSP3_P1228L,NS7a_V82A,NSP3_A488S,Spike_F157del,NSP4_T492I,NSP14_A394V,Spike_T19R,NS7a_T120I,N_D377Y,M_I82T,NSP3_T1462I,Spike_D950N,N_G212D,NS7b_T40I,NSP13_P77L,Spike_E156G,NSP3_P1469S,Spike_T478K,NSP6_T77A,NSP12_P323L,Spike_D614G,NSP4_V167L,Spike_L452R,NSP14_P140S)
hCoV-19/USA/WI-MHDL-2021120266/2021	EPI_ISL_7828338	2021-11-24	North America / USA / Wisconsin / Racine County	Human	Original	Illumina MiSeq	DRAGEN COVID lineage v3.5.5	AY.44	21J	Delta	GK	(N_G215C,N_D63G,N_R203M,NSP12_G671S,NS3_S26L,Spike_P681R,NSP3_P1228L,NSP3_A488S,NSP4_T492I,NSP14_A394V,Spike_T19R,NSP2_E545A,NSP12_F192V,N_D377Y,M_I82T,NSP15_P118S,Spike_D950N,NS8_W45C,NS7b_T40I,NSP3_A1736V,NSP13_P77L,NSP12_G823C,NSP3_P1469S,NSP14_A220V,NSP6_T77A,NSP12_P323L,Spike_D614G,NSP4_V167L)
hCoV-19/USA/WI-MHDL-2021120042/2021	EPI_ISL_7281455	2021-11-24	North America / USA / Wisconsin / Milwaukee County	Human	Original	Nanopore Clear Dx	BIP-WV6	AY.103	21J	Delta	GK	(N_G215C,N_D63G,N_R203M,NSP12_G671S,NSP3_N1934T,NSP13_I334V,NS3_S26L,Spike_P681R,Spike_R158del,NSP3_P1228L,NS7a_R78C,NS7a_V82A,NSP3_A488S,Spike_F157del,NSP4_T492I,NSP14_A394V,Spike_T19R,NS7a_T120I,N_D377Y,M_I82T,Spike_D950N,NS7b_T40I,NSP13_P77L,Spike_E156G,NSP3_P1469S,Spike_T478K,NSP6_T77A,NSP9_T77I,NSP12_P323L,Spike_D614G,NSP4_V167L,Spike_L452R,NS7a_R25K)
hCoV-19/USA/WI-MHDL-2021120040/2021	EPI_ISL_7309359	2021-11-24	North America / USA / Wisconsin / Milwaukee County	Human	Original	Nanopore Clear Dx	BIP-WV6	AY.103	21J	Delta	GK	(N_G215C,N_D63G,N_R203M,NSP12_G671S,NSP13_I334V,NS3_S26L,Spike_K182I,NSP8_P178H,Spike_P681R,Spike_R158del,NSP3_P1228L,NS7a_V82A,NSP3_A488S,Spike_F157del,NSP4_T492I,NSP14_A394V,Spike_T19R,NS7a_T120I,N_D377Y,M_I82T,Spike_D950N,NS7b_T40I,NSP13_P77L,Spike_E156G,NSP3_P1469S,Spike_T478K,NSP6_T77A,NSP12_P323L,Spike_D614G,NSP4_V167L,Spike_L452R)
hCoV-19/USA/WI-MHDL-2021120165/2021	EPI_ISL_7364699	2021-11-24	North America / USA / Wisconsin / Milwaukee County	Human	Original	Nanopore Clear Dx	BIP-WV6	AY.39	21J	Delta	GK	(N_G215C,N_D63G,N_R203M,NSP12_G671S,NSP16_Q238H,N_S194L,NS3_S26L,Spike_P681R,NSP3_L1266I,Spike_R158del,NSP3_S1265del,NS3_T223I,NSP3_P1228L,NSP2_R218C,NS7a_V82A,NSP3_A488S,Spike_F157del,NSP4_T492I,NSP14_A394V,Spike_T19R,NS7a_T120I,N_D377Y,M_I82T,Spike_D950N,NS7b_T40I,NSP13_P77L,Spike_E156G,Spike_V622I,NS7a_Q94R,NSP3_P1469S,Spike_T478K,NS7a_V71I,NSP6_T77A,NSP12_P323L,Spike_D614G,NSP4_V167L,Spike_L4…
hCoV-19/USA/WI-MHDL-2021120171/2021	EPI_ISL_7478622	2021-11-24	North America / USA / Wisconsin / Milwaukee County	Human	Original	Nanopore Clear Dx	BIP-WV6	AY.103	21J	Delta	GK	(N_G215C,N_D63G,N_R203M,NSP12_G671S,NSP13_I334V,NSP14_T372I,NS3_S26L,NSP8_P178H,Spike_P681R,Spike_R158del,NSP3_P1228L,NS7a_V82A,NSP3_A488S,Spike_F157del,NSP4_T492I,NSP14_A394V,Spike_T19R,NS7a_T120I,N_D377Y,M_I82T,Spike_D950N,NS7b_T40I,NSP13_P77L,Spike_E156G,NSP3_P1469S,NSP3_K462N,Spike_T478K,NSP6_T77A,NSP12_P323L,Spike_D614G,NSP4_V167L,Spike_L452R,NSP3_L1126S)
hCoV-19/USA/WI-MHDL-2021120172/2021	EPI_ISL_7478623	2021-11-24	North America / USA / Wisconsin / Milwaukee County	Human	Original	Nanopore Clear Dx	BIP-WV6	AY.44	21J	Delta	GK	(N_G215C,N_D63G,N_R203M,NSP12_G671S,NS3_S26L,Spike_P681R,Spike_R158del,NSP3_P1228L,N_P207S,NS7a_V82A,NS8_R115C,NSP3_A488S,Spike_F157del,NSP4_T492I,NSP14_A394V,Spike_T19R,NS7a_T120I,NSP12_F192V,N_D377Y,M_I82T,Spike_D950N,NS7b_T40I,NSP3_A1736V,NSP13_P77L,Spike_E156G,NSP3_P1469S,Spike_T478K,NSP6_T77A,NSP15_H337Y,NSP12_P323L,Spike_D614G,NSP4_V167L,Spike_L452R)
hCoV-19/USA/WI-MHDL-2021120174/2021	EPI_ISL_7478624	2021-11-24	North America / USA / Wisconsin / Milwaukee County	Human	Original	Nanopore Clear Dx	BIP-WV6	AY.44	21J	Delta	GK	(N_G215C,NS8_L60F,N_D63G,N_R203M,NSP12_G671S,NS3_S26L,NSP1_D156G,Spike_P681R,Spike_R158del,NSP3_P1228L,NSP8_I107V,NSP12_T801I,NS7a_V82A,NSP2_A360V,NSP3_A488S,Spike_F157del,NSP4_T492I,NSP14_A394V,Spike_T19R,NS7a_T120I,NSP12_F192V,N_D377Y,NSP13_H164Y,M_I82T,Spike_D950N,NSP3_K1943N,NS7b_T40I,NSP3_A1736V,NSP13_P77L,Spike_E156G,NSP3_H1307Y,NSP3_P1469S,NSP6_M164V,Spike_T478K,NSP6_T77A,NSP8_I132T,NSP12_…
hCoV-19/USA/WI-MHDL-2021120175/2021	EPI_ISL_7478625	2021-11-24	North America / USA / Wisconsin / Milwaukee County	Human	Original	Nanopore Clear Dx	BIP-WV6	AY.103	21J	Delta	GK	(N_G215C,N_D63G,NSP2_C177S,N_R203M,NSP3_P1662S,NSP12_G671S,NSP13_I334V,NS3_S26L,Spike_P681R,Spike_R158del,Spike_S939F,NSP3_P1228L,NSP3_A488S,Spike_F157del,NSP4_T492I,NSP14_A394V,Spike_T19R,NS7a_T120I,N_D377Y,M_I82T,Spike_D950N,Spike_S221L,NS7b_T40I,N_T362I,NSP13_P77L,Spike_E156G,NSP3_P1469S,Spike_T478K,NSP3_N354S,NS7a_P45L,NSP6_T77A,NSP12_P323L,Spike_D614G,NSP4_V167L,Spike_L452R,NSP4_G178S)
hCoV-19/USA/WI-MHDL-2021120173/2021	EPI_ISL_7478644	2021-11-24	North America / USA / Wisconsin / Milwaukee County	Human	Original	Nanopore Clear Dx	BIP-WV6	AY.103	21J	Delta	GK	(N_G215C,N_D63G,N_R203M,NSP12_G671S,NSP13_I334V,NS3_V77F,NS3_S26L,Spike_P681R,Spike_R158del,NSP3_P1228L,NS7a_V82A,NSP3_A488S,Spike_F157del,NSP4_T492I,NSP14_A394V,Spike_T19R,NS7a_T120I,N_D377Y,NSP3_S794L,M_I82T,Spike_D950N,NS7b_T40I,NSP13_P77L,Spike_E156G,NSP3_P1469S,Spike_T478K,NSP6_T77A,NSP12_P323L,Spike_D614G,NSP4_V167L,Spike_L452R)
hCoV-19/USA/WI-MHDL-2021120265/2021	EPI_ISL_7828337	2021-11-26	North America / USA / Wisconsin / Milwaukee County	Human	Original	Illumina MiSeq	DRAGEN COVID lineage v3.5.5	B.1.617.2	21I	Delta	GK	(NSP3_K415E,N_G215C,N_D63G,N_R203M,NSP8_T145I,NSP12_G671S,NSP6_T181I,NS3_S26L,Spike_P681R,Spike_R158del,NSP8_I2M,NS7a_V82A,Spike_F157del,Spike_T19R,NS7a_T120I,N_D377Y,M_I82T,NSP6_V149A,Spike_D950N,NS7b_T40I,NSP3_P822L,NSP13_P77L,Spike_E156G,NSP4_A446V,Spike_T478K,NSP12_P323L,Spike_D614G,Spike_L452R)
hCoV-19/USA/WI-MHDL-2021120267/2021	EPI_ISL_7828339	2021-11-26	North America / USA / Wisconsin / Waukesha County	Human	Original	Illumina MiSeq	DRAGEN COVID lineage v3.5.5	B.1.617.2	21I	Delta	GK	(N_G215C,N_D63G,N_R203M,NSP8_T145I,NSP12_G671S,NSP6_T181I,NS3_S26L,Spike_P681R,Spike_R158del,NSP8_I2M,NS7a_V82A,Spike_F157del,Spike_T19R,NS7a_T120I,N_D377Y,M_I82T,NSP6_V149A,Spike_D950N,NS7b_T40I,NSP3_P822L,NSP13_P77L,Spike_E156G,NSP4_A446V,Spike_T478K,NSP12_P323L,Spike_D614G,Spike_L452R)
hCoV-19/USA/WI-MHDL-2021120268/2021	EPI_ISL_7828340	2021-11-26	North America / USA / Wisconsin / Waukesha County	Human	Original	Illumina MiSeq	DRAGEN COVID lineage v3.5.5	B.1.617.2	21I	Delta	GK	(N_G215C,N_D63G,N_R203M,NSP8_T145I,NSP12_G671S,Spike_E484K,NSP6_T181I,NS3_S26L,Spike_P681R,Spike_R158del,NSP8_I2M,NS7a_V82A,Spike_F157del,Spike_T19R,NS7a_T120I,N_D377Y,M_I82T,NSP6_V149A,Spike_D950N,NS7b_T40I,NSP3_P822L,NSP13_P77L,Spike_E156G,NSP4_A446V,Spike_T478K,NSP12_P323L,Spike_D614G,Spike_L452R)
hCoV-19/USA/WI-MHDL-2021120116/2021	EPI_ISL_7809470	2021-11-27	North America / USA / Wisconsin / Milwaukee County	Human	Original	Illumina MiSeq	DRAGEN COVID lineage v3.5.4	AY.119	21J	Delta	GK	(N_G215C,Spike_P809S,Spike_S1242I,Spike_T95I,N_D63G,N_R203M,NSP12_G671S,NS3_S26L,Spike_P681R,Spike_R158del,NSP3_P1228L,NSP9_T24I,NS7a_V82A,NSP3_A488S,Spike_F157del,NSP4_T492I,NSP14_A394V,Spike_T19R,NS7a_T120I,N_D377Y,M_I82T,Spike_D950N,NS7b_T40I,NSP13_P77L,NSP14_A323S,Spike_E156G,M_V70F,NSP3_P1469S,NSP4_A92V,Spike_T478K,NSP6_T77A,NSP12_P323L,Spike_D614G,NSP4_V167L,Spike_L452R)
hCoV-19/USA/WI-MHDL-2021120117/2021	EPI_ISL_7809471	2021-11-27	North America / USA / Wisconsin / Milwaukee County	Human	Original	Illumina MiSeq	DRAGEN COVID lineage v3.5.4	AY.103	21J	Delta	GK	(NSP3_N618S,N_G215C,N_D63G,N_R203M,NSP12_G671S,NSP13_I334V,Spike_G142D,NS3_S26L,Spike_P681R,Spike_R158del,NSP3_P1228L,NS7a_V82A,NSP3_A488S,Spike_F157del,NSP4_T492I,NSP14_A394V,Spike_T19R,NS7a_T120I,N_G238D,N_D377Y,M_I82T,Spike_D950N,NS7b_T40I,NSP13_P77L,Spike_E156G,NSP14_T250I,NSP3_L738F,NSP3_P1469S,Spike_T478K,NSP6_T77A,NSP12_P323L,Spike_D614G,NSP4_V167L,Spike_L452R,NSP2_A294T)
hCoV-19/USA/WI-MHDL-2021120118/2021	EPI_ISL_7809472	2021-11-27	North America / USA / Wisconsin / Milwaukee County	Human	Original	Illumina MiSeq	DRAGEN COVID lineage v3.5.4	AY.119	21J	Delta	GK	(N_G215C,Spike_P809S,Spike_T95I,N_D63G,N_R203M,NSP15_A81V,NSP12_G671S,Spike_G142D,NSP3_K215N,NS3_S26L,Spike_P681R,Spike_R158del,NSP3_P1228L,NSP9_T24I,NS7a_V82A,NSP3_A488S,Spike_F157del,NSP4_T492I,NSP14_A394V,Spike_T19R,NS7a_T120I,N_D377Y,M_I82T,Spike_D950N,NS8_G66C,NS7b_T40I,NSP13_P77L,NSP14_A323S,Spike_E156G,NSP3_P1469S,NSP4_A92V,Spike_T478K,NSP6_T77A,NSP12_P323L,Spike_D614G,NSP4_V167L,Spike_L45…
hCoV-19/USA/WI-MHDL-2021120119/2021	EPI_ISL_7809473	2021-11-27	North America / USA / Wisconsin / Milwaukee County	Human	Original	Illumina MiSeq	DRAGEN COVID lineage v3.5.4	AY.103	21J	Delta	GK	(N_G215C,N_D63G,N_R203M,NSP12_G671S,NSP13_I334V,Spike_G142D,NSP2_P129L,NS3_S26L,Spike_P681R,Spike_R158del,NS8_C25Y,NSP3_P1228L,NS7a_V82A,NSP3_A488S,Spike_F157del,NSP4_T492I,NSP14_A394V,Spike_T19R,NS7a_T120I,N_D377Y,M_I82T,Spike_D950N,NS7b_T40I,NSP13_P77L,Spike_H49Y,NSP3_K1771R,Spike_E156G,NSP3_P1469S,Spike_T478K,NSP6_T77A,NSP12_P323L,Spike_D614G,NSP4_V167L,Spike_L452R)
hCoV-19/USA/WI-MHDL-2021120120/2021	EPI_ISL_7809474	2021-11-27	North America / USA / Wisconsin / Milwaukee County	Human	Original	Illumina MiSeq	DRAGEN COVID lineage v3.5.4	AY.119	21J	Delta	GK	(N_G215C,Spike_P809S,Spike_T95I,N_D63G,N_R203M,NSP12_G671S,NSP13_R392C,NS3_S26L,Spike_P681R,Spike_R158del,NSP3_P1228L,NS3_T9K,NSP9_T24I,NS7a_V82A,NSP3_A488S,Spike_F157del,NSP4_T492I,NSP14_A394V,Spike_T19R,NS7a_T120I,N_D377Y,M_I82T,Spike_D950N,NS7b_T40I,NSP13_P77L,NSP14_A323S,Spike_E156G,NSP3_P1469S,NSP4_A92V,Spike_T478K,NSP6_T77A,NSP12_P323L,Spike_D614G,NSP4_V167L,Spike_L452R)
hCoV-19/USA/WI-MHDL-2021120121/2021	EPI_ISL_7809475	2021-11-27	North America / USA / Wisconsin / Milwaukee County	Human	Original	Illumina MiSeq	DRAGEN COVID lineage v3.5.4	AY.103	21J	Delta	GK	(N_G215C,N_D63G,N_R203M,NSP12_G671S,NSP13_I334V,Spike_G142D,NSP14_T372I,NS3_S26L,NSP8_P178H,Spike_P681R,Spike_R158del,NSP3_P1228L,NS7a_V82A,NSP3_A488S,Spike_F157del,NSP4_T492I,NSP14_A394V,Spike_T19R,NS7a_T120I,N_D377Y,M_I82T,Spike_D950N,NS7b_T40I,NSP13_P77L,Spike_E156G,NSP3_P1469S,NSP3_K462N,Spike_T478K,NSP6_T77A,NSP12_P323L,Spike_D614G,NSP4_V167L,Spike_L452R,NSP3_L1126S)
hCoV-19/USA/WI-MHDL-2021120122/2021	EPI_ISL_7809476	2021-11-27	North America / USA / Wisconsin / Milwaukee County	Human	Original	Illumina MiSeq	DRAGEN COVID lineage v3.5.4	AY.39	21J	Delta	GK	(N_G215C,Spike_T95I,N_D63G,NSP1_M85del,N_R203M,NSP12_G671S,NSP16_Q238H,N_S194L,NS3_S26L,Spike_P681R,NSP3_L1266I,NSP1_H83del,Spike_R158del,NSP3_S1265del,NS3_T223I,NSP3_P1228L,NSP2_R218C,NS7a_V82A,NSP1_G82del,NSP3_A488S,Spike_F157del,NSP4_T492I,NSP14_A394V,Spike_T19R,NS7a_T120I,N_D377Y,M_I82T,Spike_D950N,NS7b_T40I,NSP13_P77L,NSP1_V86del,Spike_E156G,NSP1_V84del,Spike_V622I,NS7a_Q94R,NSP3_P1469S,Spik…
hCoV-19/USA/WI-MHDL-2021120123/2021	EPI_ISL_7809477	2021-11-27	North America / USA / Wisconsin / Milwaukee County	Human	Original	Illumina MiSeq	DRAGEN COVID lineage v3.5.4	AY.100	21J	Delta	GK	(N_G215C,Spike_T95I,N_D63G,N_R203M,NSP12_G671S,NS3_S26L,NSP13_A296S,Spike_P681R,Spike_R158del,NSP3_P1228L,NS7a_V82A,NSP3_A488S,Spike_F157del,NSP4_T492I,NSP14_A394V,Spike_T19R,NS7a_T120I,N_D377Y,M_I82T,Spike_D950N,NS7b_T40I,NSP13_P77L,Spike_E156G,NSP3_P1469S,NS8_Y31F,Spike_T478K,NSP6_T77A,NSP12_P323L,Spike_D614G,Spike_L452R,NSP4_V167L)
hCoV-19/USA/WI-MHDL-2021120124/2021	EPI_ISL_7809478	2021-11-27	North America / USA / Wisconsin / Milwaukee County	Human	Original	Illumina MiSeq	DRAGEN COVID lineage v3.5.4	AY.25	21J	Delta	GK	(Spike_G75V,N_G215C,N_D63G,N_R203M,NSP12_G671S,Spike_G142D,NS3_G251V,NS3_S26L,Spike_P681R,Spike_R158del,NSP3_P1228L,NSP3_A488S,Spike_F157del,NSP4_T492I,NSP14_A394V,Spike_T19R,N_D377Y,Spike_P1263L,M_I82T,Spike_D950N,Spike_S112L,NS7b_T40I,NSP13_P77L,Spike_E156G,M_T30I,NSP3_P1469S,Spike_T478K,NSP6_T77A,NS3_E239Q,NSP12_P323L,Spike_D614G,NSP4_V167L,Spike_L452R)
hCoV-19/USA/WI-MHDL-2021120125/2021	EPI_ISL_7809479	2021-11-27	North America / USA / Wisconsin / Milwaukee County	Human	Original	Illumina MiSeq	DRAGEN COVID lineage v3.5.4	AY.3	21J	Delta	GK	(N_G215C,N_D63G,N_R203M,Spike_I1221V,NSP12_G671S,NSP6_I162V,NS7a_V82del,Spike_G142D,NS3_S26L,NS7a_S83T,Spike_P681R,Spike_R158del,NSP3_P1228L,NSP3_A488S,Spike_F157del,NSP4_T492I,NSP5_T304I,NSP14_A394V,Spike_T19R,NS7a_T120I,N_D377Y,M_I82T,Spike_D950N,NS7b_T40I,NSP13_P77L,Spike_E156G,NS7a_S81del,NSP3_T656I,NSP3_P1469S,NSP3_L1837F,Spike_T478K,NSP6_T77A,NSP12_P323L,Spike_D614G,NSP4_V167L,Spike_L452R,N…
hCoV-19/USA/WI-MHDL-2021120126/2021	EPI_ISL_7809480	2021-11-27	North America / USA / Wisconsin / Milwaukee County	Human	Original	Illumina MiSeq	DRAGEN COVID lineage v3.5.4	AY.103	21J	Delta	GK	(N_G215C,N_D63G,N_R203M,NSP12_G671S,NSP13_I334V,Spike_G142D,NS3_S26L,Spike_P681R,Spike_R158del,NS8_C25Y,NSP3_P1228L,NS7a_V82A,NSP3_A488S,Spike_F157del,NSP4_T492I,NSP14_A394V,Spike_T19R,NS7a_T120I,NSP12_P227L,N_D377Y,M_I82T,Spike_D950N,NS7b_T40I,NSP13_P77L,NSP3_I1672T,Spike_E156G,NSP8_K37N,NSP3_P1469S,Spike_T478K,NSP6_L260F,NSP6_T77A,NSP12_P323L,Spike_D614G,NSP4_V167L,Spike_L452R)
hCoV-19/USA/WI-MHDL-2021120127/2021	EPI_ISL_7809481	2021-11-27	North America / USA / Wisconsin / Milwaukee County	Human	Original	Illumina MiSeq	DRAGEN COVID lineage v3.5.4	AY.25.1	21J	Delta	GK	(N_G215C,N_D63G,N_R203M,NSP12_G671S,Spike_G142D,NS3_S26L,Spike_P681R,Spike_R158del,NSP3_P1228L,NS7a_V82A,NSP3_A488S,Spike_F157del,NSP4_T492I,NSP14_A394V,Spike_T19R,NS7a_T120I,N_D377Y,M_I82T,NSP6_C197F,Spike_D950N,NS7b_T40I,NSP13_P77L,NS3_P42L,Spike_E156G,NS7a_P99S,Spike_T547I,NSP3_P1469S,NSP13_A463S,Spike_T478K,NSP6_T77A,NSP4_A298T,NS3_E239Q,NSP12_P323L,Spike_D614G,NSP4_V167L,Spike_L452R,NSP3_D41…
hCoV-19/USA/WI-MHDL-2021120060/2021	EPI_ISL_7281589	2021-11-28	North America / USA / Wisconsin / Milwaukee County	Human	Original	Nanopore Clear Dx	BIP-WV6	AY.44	21J	Delta	GK	(N_G215C,NS8_L60F,N_R203M,NSP12_G671S,NSP6_H11Y,NS3_S26L,Spike_P681R,Spike_R158del,NSP3_P1228L,NSP14_V125I,NSP8_P178S,NS7a_V82A,NSP3_A488S,Spike_F157del,NSP4_T492I,NSP14_A394V,Spike_T19R,NS7a_T120I,NSP12_F192V,N_D377Y,NSP13_H164Y,M_I82T,Spike_D950N,NS3_A54S,NS7b_T40I,NSP3_A1736V,NSP13_P77L,Spike_E156G,NSP3_H1307Y,NSP3_P1469S,Spike_T478K,NSP6_T77A,N_D63S,NSP3_T1830I,NSP12_P323L,Spike_D614G,NSP4_V1…
hCoV-19/USA/WI-MHDL-2021120321/2021	EPI_ISL_7828381	2021-11-29	North America / USA / Wisconsin / Milwaukee County	Human	Original	Illumina MiSeq	DRAGEN COVID lineage v3.5.5	AY.3	21J	Delta	GK	(N_G215C,N_D63G,N_R203M,NSP12_G671S,NSP6_I162V,Spike_G142D,NS3_S26L,Spike_P681R,Spike_R158del,NSP3_P1228L,NSP3_A488S,Spike_F157del,NSP4_T492I,Spike_P25L,NSP14_A394V,Spike_T19R,N_D377Y,M_I82T,NSP1_E148D,Spike_D950N,NS7b_T40I,NSP13_P77L,Spike_E156G,NSP3_C1347W,NSP3_P1469S,NSP12_G823C,Spike_T478K,NSP6_T77A,NSP12_P323L,Spike_D614G,NSP12_S27N,NSP4_V167L,Spike_L452R)
hCoV-19/USA/WI-MHDL-2021120323/2021	EPI_ISL_7828382	2021-11-29	North America / USA / Wisconsin / Milwaukee County	Human	Original	Illumina MiSeq	DRAGEN COVID lineage v3.5.5	AY.39	21J	Delta	GK	(N_G215C,N_D63G,NSP3_L297F,N_R203M,NSP12_G671S,NSP16_Q238H,NSP2_G339S,NSP14_K13N,Spike_G142D,NS3_W131C,NS3_S26L,Spike_P681R,Spike_R158del,NSP4_A146T,N_P67L,NSP3_P1228L,NS7a_V82A,NSP3_A488S,Spike_F157del,NSP4_T492I,NSP4_L353F,NSP14_A394V,Spike_T19R,NS7a_T120I,NSP6_T147A,NSP16_T151I,N_D377Y,NSP6_T6A,M_I82T,Spike_D950N,NS7b_T40I,NSP13_P77L,Spike_E156G,Spike_K1073N,Spike_R346I,NSP3_P1469S,NSP3_V987I,…
hCoV-19/USA/WI-MHDL-2022010127/2021	EPI_ISL_8565328	2021-11-29	North America / USA / Wisconsin / Milwaukee County	Human	Original	Illumina MiSeq	DRAGEN COVID lineage v3.5.5	AY.103	21J	Delta	GK	(N_G215C,N_D63G,N_R203M,NSP12_G671S,NSP13_I334V,NSP4_S336L,Spike_G142D,NS3_S26L,Spike_P681R,Spike_R158del,NSP3_P1228L,NS7a_V82A,NSP3_A488S,Spike_F157del,NSP4_T492I,NSP14_A394V,Spike_T19R,NS7a_T120I,N_D377Y,M_I82T,Spike_D950N,NS7b_T40I,NSP13_P77L,Spike_E156G,NS8_R115S,NSP3_P1469S,Spike_T478K,NS7a_P45L,NSP6_T77A,NSP2_W450C,NSP12_P323L,Spike_D614G,NSP4_V167L,Spike_L452R)
hCoV-19/USA/WI-MHDL-2022010131/2021	EPI_ISL_8565329	2021-11-29	North America / USA / Wisconsin / Milwaukee County	Human	Original	Illumina MiSeq	DRAGEN COVID lineage v3.5.5	AY.103	21J	Delta	GK	(N_G215C,N_D63G,N_R203M,NSP12_G671S,NSP13_I334V,Spike_G142D,NSP14_T372I,NS3_S26L,NSP8_P178H,Spike_P681R,Spike_R158del,NSP3_P1228L,NS7a_V82A,NSP3_A488S,Spike_F157del,NSP4_T492I,NSP14_A394V,Spike_T19R,NS7a_T120I,NSP10_A104V,N_D377Y,M_I82T,Spike_D950N,NS7b_T40I,NSP13_P77L,Spike_E156G,NSP3_P1469S,NSP3_K462N,Spike_T478K,NSP6_T77A,NSP12_P323L,Spike_D614G,NSP4_V167L,Spike_L452R,NSP3_L1126S)
hCoV-19/USA/WI-MHDL-2022010132/2021	EPI_ISL_8565330	2021-11-29	North America / USA / Wisconsin / Milwaukee County	Human	Original	Illumina MiSeq	DRAGEN COVID lineage v3.5.5	AY.103	21J	Delta	GK	(N_G215C,N_D63G,N_R203M,NSP12_G671S,NSP13_I334V,Spike_G142D,NSP2_A306S,NS3_S26L,NSP12_P112S,Spike_P681R,Spike_R158del,NSP3_P1228L,NSP3_A664V,NS7a_V82A,NSP3_A488S,Spike_F157del,NSP4_T492I,NSP14_A394V,Spike_T19R,NS7a_T120I,N_D377Y,M_I82T,Spike_D950N,NS7b_T40I,NSP13_P77L,Spike_E156G,NSP3_P1469S,Spike_T478K,NSP6_T77A,NSP12_P323L,Spike_D614G,NSP4_V167L,Spike_L452R)
hCoV-19/USA/WI-MHDL-2022010133/2021	EPI_ISL_8565331	2021-11-29	North America / USA / Wisconsin / Milwaukee County	Human	Original	Illumina MiSeq	DRAGEN COVID lineage v3.5.5	AY.25	21J	Delta	GK	(N_G215C,N_D63G,N_R203M,NSP12_G671S,Spike_G142D,NSP2_R46K,NS3_S26L,NS8_R115L,NSP12_A840T,Spike_P681R,Spike_R158del,NSP3_P1228L,NS7a_V82A,NSP3_A488S,Spike_F157del,NSP4_T492I,NSP14_A394V,Spike_T19R,NS7a_T120I,N_D377Y,M_I82T,Spike_D950N,Spike_S112L,NS7b_T40I,NSP13_P77L,Spike_E156G,M_T30I,NSP3_P1469S,Spike_T478K,NSP6_T77A,NS3_E239Q,NSP12_P323L,Spike_D614G,NSP4_V167L,Spike_L452R)
hCoV-19/USA/WI-MHDL-2022010134/2021	EPI_ISL_8565332	2021-11-29	North America / USA / Wisconsin / Milwaukee County	Human	Original	Illumina MiSeq	DRAGEN COVID lineage v3.5.5	AY.103	21J	Delta	GK	(N_P365T,N_G215C,N_D63G,N_R203M,NSP12_G671S,NSP13_I334V,Spike_G142D,NS3_S26L,NSP12_T643I,Spike_P681R,Spike_R158del,NS7a_V82A,NSP3_A488S,Spike_F157del,NSP4_T492I,NSP14_A394V,Spike_T19R,NS7a_T120I,N_D377Y,M_I82T,NSP3_T182I,Spike_D950N,NS7b_T40I,NSP13_P77L,Spike_E156G,NSP3_P1469S,Spike_T478K,NSP6_T77A,NSP12_P323L,Spike_D614G,NSP4_V167L,Spike_L452R,NSP6_V149F)
hCoV-19/USA/WI-MHDL-2022010135/2021	EPI_ISL_8565333	2021-11-29	North America / USA / Wisconsin / Milwaukee County	Human	Original	Illumina MiSeq	DRAGEN COVID lineage v3.5.5	AY.103	21J	Delta	GK	(N_G215C,N_D63G,N_R203M,NSP12_G671S,NSP13_I334V,Spike_G142D,NSP14_T372I,NS3_S26L,NSP8_P178H,Spike_P681R,Spike_R158del,NSP3_P1228L,NS7a_V82A,NSP3_A488S,Spike_F157del,NSP4_T492I,NSP14_A394V,Spike_T19R,NS7a_T120I,NSP10_A104V,N_D377Y,M_I82T,Spike_D950N,NS7b_T40I,NSP13_P77L,Spike_E156G,NSP3_P1469S,NSP3_K462N,Spike_T478K,NSP6_T77A,NSP12_P323L,Spike_D614G,NSP4_V167L,Spike_L452R,NSP3_L1126S)
hCoV-19/USA/WI-MHDL-2022010136/2021	EPI_ISL_8565334	2021-11-29	North America / USA / Wisconsin / Milwaukee County	Human	Original	Illumina MiSeq	DRAGEN COVID lineage v3.5.5	AY.3	21J	Delta	GK	(N_G215C,N_D63G,N_R203M,NSP12_G671S,NSP6_I162V,Spike_G142D,NS3_S26L,Spike_P681R,Spike_R158del,NS7a_V82A,NSP3_A488S,Spike_F157del,NSP4_T492I,NSP14_A394V,Spike_T19R,NS7a_T120I,N_D377Y,M_I82T,Spike_D950N,NS7b_T40I,NSP13_P77L,Spike_E156G,NSP3_P1469S,Spike_T478K,NSP6_T77A,NSP14_A187S,NSP12_P323L,Spike_D614G,NSP4_V167L,NSP5_I259L,Spike_L452R)
hCoV-19/USA/WI-MHDL-2022010137/2021	EPI_ISL_8565335	2021-11-29	North America / USA / Wisconsin / Milwaukee County	Human	Original	Illumina MiSeq	DRAGEN COVID lineage v3.5.5	AY.44	21J	Delta	GK	(N_G215C,NS8_L60F,N_D63G,NS3_G174N,N_R203M,NSP12_G671S,Spike_G142D,NS3_S26L,Spike_P681R,Spike_R158del,NSP3_P1228L,Spike_T29I,NS7a_V82A,NSP3_A488S,Spike_F157del,NSP4_T492I,NSP14_A394V,Spike_T19R,NS7a_T120I,NSP12_F192V,N_D377Y,NSP13_H164Y,M_I82T,Spike_D950N,NS7b_T40I,NSP3_A1736V,NSP13_P77L,Spike_E156G,NSP3_H1307Y,NSP3_P1469S,Spike_T478K,NSP6_T77A,NSP12_P323L,Spike_D614G,NSP4_V167L,Spike_L452R)
hCoV-19/USA/WI-MHDL-2022010139/2021	EPI_ISL_8565336	2021-11-29	North America / USA / Wisconsin / Milwaukee County	Human	Original	Illumina MiSeq	DRAGEN COVID lineage v3.5.5	AY.25	21J	Delta	GK	(N_G215C,N_D63G,N_R203M,NSP12_G671S,Spike_G142D,NSP2_A518V,NSP3_V477F,NS3_S26L,Spike_P681R,Spike_R158del,NSP3_P1228L,NS7a_V82A,NSP3_A488S,Spike_F157del,NSP4_T492I,NSP14_A394V,Spike_T19R,NS7a_T120I,N_D377Y,M_I82T,Spike_D950N,NS7b_T40I,NSP13_P77L,Spike_E156G,NSP3_P1469S,Spike_T478K,NSP6_T77A,NS3_E239Q,NSP9_R39K,NSP12_P323L,Spike_D614G,NSP4_V167L,Spike_L452R)
hCoV-19/USA/WI-MHDL-2022010128/2021	EPI_ISL_8593659	2021-11-29	North America / USA / Wisconsin / Milwaukee County	Human	Original	Illumina MiSeq	DRAGEN COVID lineage v3.5.5	AY.3	21J	Delta	GK	(N_G215C,N_D63G,N_R203M,NSP12_G671S,NSP6_I162V,Spike_G142D,NS3_S26L,Spike_P681R,Spike_R158del,NSP3_P1228L,NS7a_V82A,NSP3_A488S,Spike_F157del,NSP4_T492I,NSP14_A394V,Spike_T19R,NS7a_T120I,Spike_W258L,N_D377Y,Spike_I1018V,M_I82T,Spike_D950N,NS7b_T40I,NSP13_P77L,Spike_E156G,NSP7_V66I,NSP3_P1469S,Spike_T478K,NSP6_T77A,NSP3_P236L,NSP12_P323L,Spike_D614G,NSP4_V167L,Spike_L452R)
hCoV-19/USA/WI-MHDL-2021120037/2021	EPI_ISL_7281426	2021-11-29	North America / USA / Wisconsin / Waukesha County	Human	Original	Nanopore Clear Dx	BIP-WV6	AY.103	21J	Delta	GK	(N_G215C,N_D63G,N_R203M,NSP12_G671S,NSP13_I334V,NS3_S26L,Spike_P681R,Spike_R158del,NSP3_P1228L,NS7a_V82A,NSP3_A488S,Spike_F157del,NSP4_T492I,NSP14_A394V,Spike_T19R,NS7a_T120I,N_D377Y,M_I82T,Spike_D950N,NS7b_T40I,NSP13_P77L,Spike_E156G,NSP3_P1469S,Spike_T478K,NSP6_T77A,NSP12_P323L,Spike_D614G,Spike_L452R,NSP4_V167L)
hCoV-19/USA/WI-MHDL-2021120038/2021	EPI_ISL_7281433	2021-11-29	North America / USA / Wisconsin / Waukesha County	Human	Original	Nanopore Clear Dx	BIP-WV6	AY.103	21J	Delta	GK	(N_G215C,N_D63G,N_R203M,NSP12_G671S,NSP13_I334V,NS3_S26L,Spike_P681R,Spike_R158del,NSP3_P1228L,NS7a_V82A,NSP3_A488S,Spike_F157del,NSP4_T492I,NSP14_A394V,Spike_T19R,NS7a_T120I,N_D377Y,M_I82T,Spike_D950N,NS7b_T40I,NSP13_P77L,Spike_E156G,NSP3_P1469S,Spike_T478K,NSP6_T77A,NSP12_P323L,Spike_D614G,Spike_L452R,NSP4_V167L)
hCoV-19/USA/WI-MHDL-2021120044/2021	EPI_ISL_7281466	2021-11-29	North America / USA / Wisconsin / Milwaukee County	Human	Original	Nanopore Clear Dx	BIP-WV6	AY.119	21J	Delta	GK	(N_G215C,Spike_P809S,N_D63G,N_R203M,NSP12_G671S,NS3_S26L,Spike_P681R,Spike_R158del,NSP3_P1228L,NS3_T9K,NSP9_T24I,NS7a_V82A,NSP3_A488S,Spike_F157del,NSP4_T492I,NSP14_A394V,Spike_T19R,NS7a_T120I,N_D377Y,M_I82T,Spike_D950N,NS7b_T40I,NSP13_P77L,NSP14_A323S,Spike_E156G,NSP3_P1469S,NSP4_A92V,Spike_T478K,NSP6_T77A,NSP12_P323L,Spike_D614G,NSP4_V167L,Spike_L452R)
hCoV-19/USA/WI-MHDL-2021120045/2021	EPI_ISL_7281475	2021-11-29	North America / USA / Wisconsin / Milwaukee County	Human	Original	Nanopore Clear Dx	BIP-WV6	AY.103	21J	Delta	GK	(N_G215C,N_D63G,N_R203M,NSP12_G671S,NSP13_I334V,NS3_S26L,Spike_P681R,Spike_R158del,NSP3_P1228L,NS7a_V82A,NSP3_A488S,Spike_F157del,NSP4_T492I,NSP14_A394V,Spike_T19R,NS7a_T120I,N_D377Y,M_I82T,Spike_D950N,NS7b_S31L,NS7b_T40I,NSP13_P77L,Spike_E156G,NSP3_P1469S,Spike_T478K,NSP6_T77A,NSP12_P323L,Spike_D614G,Spike_L452R,NSP4_V167L)
hCoV-19/USA/WI-MHDL-2021120046/2021	EPI_ISL_7281483	2021-11-29	North America / USA / Wisconsin / Milwaukee County	Human	Original	Nanopore Clear Dx	BIP-WV6	AY.103	21J	Delta	GK	(N_G215C,N_D63G,N_R203M,NSP12_G671S,NSP13_I334V,NS3_S26L,Spike_P681R,Spike_R158del,NSP3_P1228L,NS7a_V82A,NSP3_A488S,Spike_F157del,NSP4_T492I,NSP14_A394V,Spike_T19R,NS7a_T120I,N_D377Y,M_I82T,Spike_D950N,NS7b_T40I,NSP13_P77L,Spike_E156G,NSP12_A554V,NSP3_P1469S,Spike_T478K,NSP6_T77A,NSP12_P323L,Spike_D614G,NSP3_D785A,NSP4_V167L,Spike_L452R,NSP2_H237R)
hCoV-19/USA/WI-MHDL-2021120050/2021	EPI_ISL_7281516	2021-11-29	North America / USA / Wisconsin / Milwaukee County	Human	Original	Nanopore Clear Dx	BIP-WV6	AY.103	21J	Delta	GK	(NSP14_G251S,N_G215C,N_D63G,NSP2_C177S,N_R203M,NSP12_G671S,NSP13_I334V,NS3_S26L,Spike_P681R,Spike_R158del,NSP3_P1228L,NSP3_T350I,NS7a_V82A,NSP3_A488S,Spike_F157del,NSP4_T492I,NSP14_A394V,Spike_T19R,NS7a_T120I,N_D377Y,M_I82T,Spike_D950N,NS7b_T40I,NSP13_P77L,NSP5_A129V,Spike_E156G,NSP3_P1469S,Spike_T478K,NSP6_T77A,NSP12_P323L,Spike_D614G,NSP4_V167L,Spike_L452R)
hCoV-19/USA/WI-MHDL-2021120051/2021	EPI_ISL_7281522	2021-11-29	North America / USA / Wisconsin / Milwaukee County	Human	Original	Nanopore Clear Dx	BIP-WV6	AY.25	21J	Delta	GK	(N_G215C,N_D63G,N_R203M,NSP12_G671S,NS3_S26L,NS8_R115L,Spike_P681R,Spike_R158del,NSP3_P1228L,NS7a_V82A,NSP3_A488S,Spike_F157del,NSP4_T492I,NSP14_A394V,Spike_T19R,NS7a_T120I,N_D377Y,M_I82T,Spike_D950N,NS7b_T40I,NSP13_P77L,Spike_E156G,M_T30I,NSP3_P1469S,Spike_T478K,NSP6_T77A,NS3_E239Q,NSP12_P323L,Spike_D614G,Spike_L452R,NSP4_V167L)
hCoV-19/USA/WI-MHDL-2021120052/2021	EPI_ISL_7281533	2021-11-29	North America / USA / Wisconsin / Milwaukee County	Human	Original	Nanopore Clear Dx	BIP-WV6	AY.25	21J	Delta	GK	(N_G215C,N_D63G,N_R203M,NSP12_G671S,NS3_S26L,NS8_R115L,Spike_P681R,Spike_R158del,NSP3_P1228L,NS7a_V82A,NSP3_A488S,Spike_F157del,NSP4_T492I,NSP14_A394V,Spike_T19R,NS7a_T120I,N_D377Y,M_I82T,Spike_D950N,NS7b_T40I,NSP13_P77L,Spike_E156G,M_T30I,NSP3_P1469S,Spike_T478K,NSP6_T77A,NS3_E239Q,NSP12_P323L,Spike_D614G,Spike_L452R,NSP4_V167L)
hCoV-19/USA/WI-MHDL-2021120053/2021	EPI_ISL_7281540	2021-11-29	North America / USA / Wisconsin / Milwaukee County	Human	Original	Nanopore Clear Dx	BIP-WV6	AY.25	21J	Delta	GK	(N_G215C,N_D63G,N_R203M,NSP12_G671S,NS3_S26L,NS8_R115L,Spike_P681R,Spike_R158del,NSP3_P1228L,NS7a_V82A,NSP3_A488S,Spike_F157del,NSP4_T492I,NSP14_A394V,Spike_T19R,NS7a_T120I,N_D377Y,M_I82T,Spike_D950N,NS7b_T40I,NSP13_P77L,Spike_E156G,M_T30I,NSP3_P1469S,Spike_T478K,NSP6_T77A,NS3_E239Q,NSP12_P323L,Spike_D614G,Spike_L452R,NSP4_V167L)
hCoV-19/USA/WI-MHDL-2021120056/2021	EPI_ISL_7281556	2021-11-29	North America / USA / Wisconsin / Milwaukee County	Human	Original	Nanopore Clear Dx	BIP-WV6	AY.25	21J	Delta	GK	(N_G215C,N_D63G,N_R203M,NSP12_G671S,NS3_S26L,NS8_R115L,Spike_P681R,Spike_R158del,NSP3_P1228L,NS7a_V82A,NSP3_A488S,Spike_F157del,NSP4_T492I,NSP14_A394V,Spike_T19R,NS7a_T120I,N_D377Y,M_I82T,Spike_D950N,NS7b_T40I,NSP13_P77L,Spike_E156G,M_T30I,NSP3_P1469S,Spike_T478K,NSP6_T77A,NS3_E239Q,NSP12_P323L,Spike_D614G,Spike_L452R,NSP4_V167L)
hCoV-19/USA/WI-MHDL-2021120057/2021	EPI_ISL_7281562	2021-11-29	North America / USA / Wisconsin / Milwaukee County	Human	Original	Nanopore Clear Dx	BIP-WV6	AY.25	21J	Delta	GK	(N_G215C,N_D63G,N_R203M,NSP12_G671S,NS3_S26L,NS8_R115L,Spike_P681R,Spike_R158del,NSP3_P1228L,NS7a_V82A,NSP3_A488S,Spike_F157del,NSP4_T492I,NSP14_A394V,Spike_T19R,NS7a_T120I,N_D377Y,M_I82T,Spike_D950N,NS3_A54S,NS7b_T40I,NSP13_P77L,Spike_E156G,M_T30I,NSP3_P1469S,Spike_T478K,NSP6_T77A,NS3_E239Q,NSP12_P323L,Spike_D614G,NSP4_V167L,Spike_L452R)
hCoV-19/USA/WI-MHDL-2021120058/2021	EPI_ISL_7281573	2021-11-29	North America / USA / Wisconsin / Milwaukee County	Human	Original	Nanopore Clear Dx	BIP-WV6	AY.25	21J	Delta	GK	(N_G215C,N_D63G,N_R203M,NSP12_G671S,NS3_S26L,NS8_R115L,Spike_P681R,NSP3_P1228L,NS7a_V82A,NSP3_A488S,NSP4_T492I,NSP14_A394V,Spike_T19R,NS7a_T120I,N_D377Y,M_I82T,Spike_D950N,NS7b_T40I,NSP13_P77L,M_T30I,NSP3_P1469S,NSP6_T77A,NS3_E239Q,NSP12_P323L,Spike_D614G,NSP4_V167L)
hCoV-19/USA/WI-MHDL-2021120059/2021	EPI_ISL_7281581	2021-11-29	North America / USA / Wisconsin / Milwaukee County	Human	Original	Nanopore Clear Dx	BIP-WV6	AY.3.1	21J	Delta	GK	(N_G215C,N_D63G,N_R203M,NSP14_H26Y,NSP12_G671S,NSP6_I162V,NS3_S26L,Spike_P681R,Spike_R158del,NSP3_P1228L,NS7a_V82A,NSP3_A488S,Spike_F157del,NSP4_T492I,NSP14_A394V,Spike_T19R,NS7a_T120I,N_D377Y,M_I82T,Spike_D950N,NS7b_T40I,NSP13_P77L,Spike_E156G,NSP3_P1469S,NS8_S67F,Spike_T478K,NSP6_T77A,NSP5_A193S,NSP3_D309Y,NSP1_P80L,NSP12_P323L,Spike_D614G,NSP4_V167L,Spike_L452R)
hCoV-19/USA/WI-MHDL-2021120200/2021	EPI_ISL_7660945	2021-11-29	North America / USA / Wisconsin / Milwaukee County	Human	Original	Nanopore Clear Dx	BIP-WV6	AY.119	21J	Delta	GK	(N_G215C,Spike_P809S,N_D63G,N_R203M,NSP12_G671S,NS3_S26L,Spike_P681R,Spike_R158del,NSP3_P1228L,NSP9_T24I,NS7a_V82A,NSP3_A488S,Spike_F157del,NSP4_T492I,NSP14_A394V,Spike_T19R,NS7a_T120I,N_D377Y,M_I82T,Spike_D950N,NS7b_T40I,NSP13_P77L,NSP14_A323S,Spike_E156G,M_V70F,NSP3_P1469S,NSP4_A92V,Spike_T478K,NSP6_T77A,NSP12_P323L,Spike_D614G,NSP4_V167L,Spike_L452R)
hCoV-19/USA/WI-MHDL-2021120218/2021	EPI_ISL_7660949	2021-11-29	North America / USA / Wisconsin / Milwaukee County	Human	Original	Nanopore Clear Dx	BIP-WV6	AY.103	21J	Delta	GK	(N_G215C,N_D63G,N_R203M,NS3_H78Y,NSP12_G671S,NSP13_I334V,NS3_S26L,NSP8_P178H,Spike_P681R,Spike_R158del,NSP3_P1228L,NS7a_V82A,NSP3_A488S,Spike_F157del,NSP4_T492I,NSP14_A394V,Spike_T19R,NS7a_T120I,N_D377Y,M_I82T,Spike_D950N,NS7b_T40I,NSP13_P77L,Spike_E156G,NSP13_S589I,NSP3_P1469S,Spike_T478K,NSP6_T77A,NS7a_V71L,NSP12_P323L,Spike_D614G,NSP4_V167L,Spike_L452R)
hCoV-19/USA/WI-MHDL-2021120219/2021	EPI_ISL_7660950	2021-11-29	North America / USA / Wisconsin / Milwaukee County	Human	Original	Nanopore Clear Dx	BIP-WV6	AY.103	21J	Delta	GK	(N_G215C,N_D63G,N_R203M,NSP1_L27F,NSP12_G671S,NSP13_I334V,NS3_S26L,Spike_P681R,Spike_R158del,NSP3_P1228L,NS7a_V82A,NSP3_A488S,Spike_F157del,NSP4_T492I,NSP14_A394V,Spike_T19R,NS7a_T120I,N_D377Y,M_I82T,Spike_D950N,NS7b_T40I,NSP13_P77L,Spike_E156G,NSP3_P1469S,Spike_T478K,NSP6_T77A,NSP12_P323L,Spike_D614G,Spike_L452R,NSP4_V167L)
hCoV-19/USA/WI-MHDL-2021120221/2021	EPI_ISL_7660951	2021-11-29	North America / USA / Wisconsin / Milwaukee County	Human	Original	Nanopore Clear Dx	BIP-WV6	AY.100	21J	Delta	GK	(N_G215C,N_D63G,N_R203M,NSP12_G671S,NSP2_T223I,Spike_E1202Q,NS3_S26L,NSP13_A296S,Spike_P681R,Spike_R158del,NSP3_P1228L,NS7a_V82A,NSP3_A488S,Spike_F157del,NSP4_T492I,NSP14_A394V,Spike_T19R,NS7a_T120I,N_D377Y,M_I82T,Spike_D950N,NS7b_T40I,NSP13_P77L,Spike_E156G,NSP3_P1469S,Spike_T478K,NS3_T151I,NSP6_T77A,NSP3_D806G,NSP12_P323L,Spike_D614G,NSP4_V167L,Spike_L452R,NSP4_T295I)
hCoV-19/USA/WI-MHDL-2021120222/2021	EPI_ISL_7660952	2021-11-29	North America / USA / Wisconsin / Milwaukee County	Human	Original	Nanopore Clear Dx	BIP-WV6	AY.119	21J	Delta	GK	(N_G215C,Spike_P809S,N_D63G,N_R203M,NSP12_G671S,NS3_S26L,Spike_P681R,Spike_R158del,NSP3_P1228L,NSP9_T24I,NS7a_V82A,NSP3_A488S,Spike_F157del,NSP4_T492I,NSP14_A394V,Spike_T19R,NS7a_T120I,N_D377Y,M_I82T,Spike_D950N,NS7b_T40I,NSP13_P77L,NSP14_A323S,Spike_E156G,M_V70F,NSP3_P1469S,NSP4_A92V,Spike_T478K,NSP6_T77A,NSP12_P323L,Spike_D614G,NSP4_V167L,Spike_L452R)
hCoV-19/USA/WI-MHDL-2021120223/2021	EPI_ISL_7660953	2021-11-29	North America / USA / Wisconsin / Milwaukee County	Human	Original	Nanopore Clear Dx	BIP-WV6	AY.103	21J	Delta	GK	(N_G215C,N_D63G,N_R203M,NSP12_G671S,NSP13_I334V,NSP3_T1306I,NSP3_T734I,NS3_S26L,Spike_P681R,NS3_L108F,Spike_R158del,NSP3_P1228L,NSP3_A488S,Spike_F157del,NSP4_T492I,NSP14_A394V,Spike_T19R,NS7a_T120I,NSP3_S1717L,N_D377Y,M_I82T,NSP15_G17E,Spike_D950N,NS7b_T40I,NS3_R134H,NSP13_P77L,Spike_E156G,NSP6_V26A,NSP3_P1469S,NS8_T87I,Spike_T478K,NSP6_T77A,NSP12_P323L,Spike_D614G,NSP3_E1799A,NSP4_V167L,Spike_L4…
hCoV-19/USA/WI-MHDL-2021120224/2021	EPI_ISL_7660954	2021-11-29	North America / USA / Wisconsin / Milwaukee County	Human	Original	Nanopore Clear Dx	BIP-WV6	AY.100	21J	Delta	GK	(N_G215C,N_D63G,NSP12_G671S,NSP4_G288C,NS3_S26L,NSP13_A296S,Spike_P681R,Spike_R158del,NSP3_P1228L,NS7a_V82A,NSP3_A488S,Spike_F157del,NSP4_T492I,NSP14_A394V,Spike_T19R,NS7a_T120I,N_D377Y,M_I82T,Spike_D950N,N_T263I,NS7b_T40I,NS3_I118V,NSP13_P77L,Spike_E156G,NS3_E102Q,NSP3_P1469S,NS8_Y31F,Spike_T478K,NSP6_T77A,NSP12_P323L,Spike_D614G,NSP4_V167L,Spike_L452R,N_E31A,N_R203V)
hCoV-19/USA/WI-MHDL-2021120226/2021	EPI_ISL_7660955	2021-11-29	North America / USA / Wisconsin / Milwaukee County	Human	Original	Nanopore Clear Dx	BIP-WV6	AY.103	21J	Delta	GK	(N_G215C,N_D63G,N_R203M,NSP12_G671S,NSP13_I334V,NS3_S26L,Spike_P681R,Spike_R158del,NS8_C25Y,NSP3_P1228L,NS7a_V82A,NSP3_A488S,Spike_F157del,NSP4_T492I,NSP14_A394V,Spike_T19R,NS7a_T120I,N_D377Y,M_I82T,Spike_D950N,NS7b_T40I,NSP13_P77L,Spike_E156G,NSP3_P1469S,Spike_T478K,NSP6_T77A,NSP12_P323L,Spike_D614G,Spike_L452R,NSP4_V167L)
hCoV-19/USA/WI-MHDL-2021120227/2021	EPI_ISL_7660958	2021-11-29	North America / USA / Wisconsin / Milwaukee County	Human	Original	Nanopore Clear Dx	BIP-WV6	AY.103	21J	Delta	GK	(N_G215C,N_D63G,N_R203M,NSP12_G671S,NSP13_I334V,NSP2_G438S,NS3_S26L,Spike_P681R,Spike_R158del,NSP3_P1228L,NS7a_V82A,NSP3_A488S,Spike_F157del,NSP4_T492I,NSP14_A394V,Spike_T19R,NS7a_T120I,N_D377Y,M_I82T,NSP13_P300L,Spike_D950N,NS7b_T40I,NSP13_P77L,Spike_E156G,NSP3_P1469S,Spike_T478K,NSP6_T77A,NSP12_P323L,Spike_D614G,NSP4_V167L,Spike_L452R)
hCoV-19/USA/WI-MHDL-2021120220/2021	EPI_ISL_7660961	2021-11-29	North America / USA / Wisconsin / Milwaukee County	Human	Original	Nanopore Clear Dx	BIP-WV6	AY.39	21J	Delta	GK	(N_G215C,N_D63G,N_R203M,NSP12_G671S,NS3_S26L,Spike_P681R,Spike_R158del,NSP3_P1228L,NS3_L95S,NS7a_V82A,NSP3_A488S,Spike_F157del,NSP4_T492I,NSP14_A394V,NS7a_T120I,NSP2_A375V,N_D377Y,M_I82T,Spike_D950N,NS7b_T40I,NSP13_P77L,Spike_E156G,NSP3_P1469S,NSP16_Q238Y,Spike_T478K,NS7a_V71I,NSP6_T77A,NSP4_T237I,NSP12_P323L,Spike_D614G,NSP4_V167L,Spike_L452R)
hCoV-19/USA/WI-MHDL-2021120225/2021	EPI_ISL_7660963	2021-11-29	North America / USA / Wisconsin / Milwaukee County	Human	Original	Nanopore Clear Dx	BIP-WV6	AY.103	21J	Delta	GK	(N_G215C,N_D63G,N_R203M,NSP12_G671S,NSP13_I334V,NS3_S26L,N_S206P,NSP8_P178H,Spike_P681R,NSP3_P1228L,NS7a_V82A,NSP3_A488S,NSP4_T492I,NSP14_A394V,Spike_T19R,NS7a_T120I,N_D377Y,M_I82T,Spike_D950N,NS7b_T40I,NSP13_P77L,E_V5I,NSP3_T820A,NSP3_P1469S,Spike_T478K,NSP6_T77A,NSP12_P323L,Spike_D614G,Spike_L452R,NSP4_V167L,NSP15_S328L)
hCoV-19/USA/WI-MHDL-2021120201/2021	EPI_ISL_7660965	2021-11-29	North America / USA / Wisconsin / Milwaukee County	Human	Original	Nanopore Clear Dx	BIP-WV6	AY.25	21J	Delta	GK	(N_G215C,N_D63G,N_R203M,NSP12_G671S,NSP2_A518V,NSP3_V477F,NS3_S26L,Spike_P681R,Spike_R158del,NSP3_P1228L,NS7a_V82A,NSP3_A488S,Spike_F157del,NSP4_T492I,NSP14_A394V,Spike_T19R,NS7a_T120I,N_D377Y,M_I82T,Spike_D950N,NS7b_T40I,NSP13_P77L,Spike_E156G,NSP3_P1469S,Spike_T478K,NSP6_T77A,NS3_E239Q,NSP9_R39K,NSP12_P323L,Spike_D614G,NSP4_V167L,Spike_L452R)
hCoV-19/USA/WI-MHDL-2021120336/2021	EPI_ISL_7698304	2021-11-29	North America / USA / Wisconsin / Milwaukee County	Human	Original	Nanopore Clear Dx	BIP-WV6	AY.103	21J	Delta	GK	(N_G215C,N_D63G,NSP2_C177S,N_R203M,NSP12_G671S,NSP13_I334V,Spike_G142D,NS3_S26L,Spike_P681R,Spike_R158del,NSP3_P1228L,NS7a_V82A,NSP3_A488S,Spike_F157del,NSP4_T492I,NSP14_A394V,Spike_T19R,NS7a_T120I,N_D377Y,M_I82T,Spike_D950N,NS7b_T40I,NSP13_P77L,Spike_E156G,NSP3_P1469S,NSP14_S357I,NSP3_N354S,NSP6_T77A,NSP12_P323L,Spike_D614G,NSP4_V167L,NSP4_G178S)
hCoV-19/USA/WI-MHDL-2021120337/2021	EPI_ISL_7698306	2021-11-29	North America / USA / Wisconsin / Milwaukee County	Human	Original	Nanopore Clear Dx	BIP-WV6	AY.103	21J	Delta	GK	(N_G215C,N_D63G,NSP2_C177S,N_R203M,NSP12_G671S,NSP13_I334V,Spike_G142D,NS3_S26L,Spike_P681R,Spike_R158del,NSP3_P1228L,NS7a_V82A,NSP3_A488S,Spike_F157del,NSP4_T492I,NSP14_A394V,Spike_T19R,NS7a_T120I,N_D377Y,M_I82T,Spike_D950N,NS7b_T40I,NSP13_P77L,Spike_E156G,NSP3_P1469S,Spike_T478K,NSP14_S357I,NSP3_N354S,NSP6_T77A,NSP12_P323L,Spike_D614G,NSP4_V167L,Spike_L452R,NSP4_G178S)
hCoV-19/USA/WI-MHDL-2021120338/2021	EPI_ISL_7698310	2021-11-29	North America / USA / Wisconsin / Milwaukee County	Human	Original	Nanopore Clear Dx	BIP-WV6	AY.103	21J	Delta	GK	(N_G215C,N_D63G,NSP2_C177S,N_R203M,NSP3_P1662S,NSP12_G671S,NSP13_I334V,Spike_G142D,NS3_S26L,Spike_P681R,Spike_R158del,NSP3_P1228L,NS7a_V82A,NSP3_A488S,Spike_F157del,NSP4_T492I,NSP14_A394V,Spike_T19R,NS7a_T120I,N_D377Y,M_I82T,Spike_D950N,Spike_S221L,NS7b_T40I,NSP13_P77L,Spike_E156G,NSP3_P1469S,Spike_T478K,NSP3_N354S,NS7a_P45L,NSP6_T77A,NSP12_P323L,Spike_D614G,NSP4_V167L,Spike_L452R,NSP4_G178S)
hCoV-19/USA/WI-MHDL-2021120339/2021	EPI_ISL_7698311	2021-11-29	North America / USA / Wisconsin / Milwaukee County	Human	Original	Nanopore Clear Dx	BIP-WV6	AY.25.1	21J	Delta	GK	(N_G215C,N_D63G,N_R203M,NSP12_G671S,NS3_S26L,Spike_P681R,NSP3_P1228L,NS7a_V82A,NSP3_A488S,NSP4_T492I,NSP14_A394V,Spike_T19R,NS7a_T120I,N_D377Y,M_I82T,NSP6_C197F,Spike_D950N,NS7b_T40I,NSP13_P77L,NS3_P42L,NS7a_P99S,Spike_T547I,NSP3_P1469S,NSP13_A463S,NSP4_A298T,NSP6_T77A,NS3_E239Q,NSP12_P323L,Spike_D614G,NSP4_V167L,NSP3_D410G)
hCoV-19/USA/WI-MHDL-2021120340/2021	EPI_ISL_7698314	2021-11-29	North America / USA / Wisconsin / Milwaukee County	Human	Original	Nanopore Clear Dx	BIP-WV6	AY.44	21J	Delta	GK	(N_G215C,NS8_L60F,N_R203M,NSP12_G671S,NS3_I236V,NS3_S26L,Spike_P681R,Spike_R158del,NSP3_P1228L,NS7a_V82A,NSP3_A488S,Spike_F157del,NSP4_T492I,Spike_Q677H,NSP14_A394V,Spike_T19R,NS7a_T120I,NSP12_F192V,N_D377Y,NSP13_H164Y,M_I82T,NS7a_V104del,Spike_D950N,NS7b_T40I,NSP3_A1736V,NSP13_P77L,Spike_E156G,NSP3_H1307Y,NS7a_L102del,NSP3_P1469S,NSP3_D1283Y,Spike_T478K,NSP6_T77A,N_D63S,NSP12_P323L,Spike_D614G,N…
hCoV-19/USA/WI-MHDL-2021120414/2021	EPI_ISL_7935030	2021-11-29	North America / USA / Wisconsin / Milwaukee County	Human	Original	Nanopore Clear Dx	BIP-WV6	AY.43	21J	Delta	GK	(N_G215C,N_D63G,N_R203M,NSP12_G671S,NS3_S26L,Spike_P681R,Spike_R158del,NSP3_P1228L,NS7a_V82A,NSP3_A488S,Spike_F157del,NSP4_T492I,NSP14_A394V,Spike_T19R,NS6_S50Y,NS7a_T120I,N_D377Y,M_I82T,Spike_D950N,N_Q9L,NS3_A54S,NS7b_T40I,NSP13_P77L,Spike_E156G,NSP3_P1469S,NSP3_V765F,NSP12_L838I,NSP6_T77A,NSP3_I310S,NSP12_P323L,Spike_D614G,NSP4_V167L)
hCoV-19/USA/WI-MHDL-2021120416/2021	EPI_ISL_7935031	2021-11-29	North America / USA / Wisconsin / Milwaukee County	Human	Original	Nanopore Clear Dx	BIP-WV6	AY.100	21J	Delta	GK	(N_G215C,N_D63G,N_R203M,NSP12_G671S,NS3_L41F,NSP2_T223I,NS3_S26L,NSP13_A296S,Spike_P681R,Spike_R158del,NSP3_P1228L,NSP3_L1791F,NS7a_V82A,NSP3_A488S,Spike_F157del,NSP4_T492I,NSP14_A394V,Spike_T19R,NS7a_T120I,Spike_L18F,N_D377Y,M_I82T,Spike_D950N,NS7b_T40I,NSP13_P77L,Spike_E156G,NSP3_P1469S,NSP6_T77A,NSP12_P323L,Spike_D614G,NSP4_V167L)
hCoV-19/USA/WI-MHDL-2021120417/2021	EPI_ISL_7935035	2021-11-29	North America / USA / Wisconsin / Milwaukee County	Human	Original	Nanopore Clear Dx	BIP-WV6	AY.25	21J	Delta	GK	(N_G215C,N_D63G,N_R203M,NS7a_A105V,NSP12_G671S,NSP16_Q238H,NS3_S26L,NSP12_L869F,Spike_P681R,Spike_R158del,NSP3_P1228L,NSP4_A146V,N_Q289H,NS7a_V82A,NSP3_A488S,Spike_F157del,NSP4_T492I,NSP14_A394V,Spike_T19R,NS7a_T120I,NS3_W45R,N_D377Y,M_I82T,Spike_D950N,NS7b_T40I,NSP13_P77L,NSP15_I305V,Spike_E156G,NSP3_P1469S,NSP12_M902W,NSP13_A520T,Spike_T478K,NSP6_T77A,NS3_E239Q,NSP12_P323L,Spike_D614G,NSP4_V167…
hCoV-19/USA/WI-MHDL-2021120418/2021	EPI_ISL_7935036	2021-11-29	North America / USA / Wisconsin / Milwaukee County	Human	Original	Nanopore Clear Dx	BIP-WV6	AY.103	21J	Delta	GK	(N_G215C,N_D63G,N_R203M,NSP12_G671S,NSP13_I334V,NS3_S26L,Spike_P681R,Spike_R158del,NSP3_P1228L,NS7a_V82A,NSP3_A488S,Spike_F157del,NSP4_T492I,NSP14_A394V,Spike_T19R,NS7a_T120I,N_D377Y,NSP15_V127F,M_I82T,Spike_D950N,NS7b_T40I,NSP13_P77L,Spike_E156G,NSP5_T190I,NSP3_P1469S,Spike_T478K,NSP6_T77A,NSP12_P323L,Spike_D614G,NSP3_D785A,NSP4_V167L,Spike_L452R,NSP2_H237R)
hCoV-19/USA/WI-MHDL-2021120419/2021	EPI_ISL_7935043	2021-11-29	North America / USA / Wisconsin / Milwaukee County	Human	Original	Nanopore Clear Dx	BIP-WV6	AY.103	21J	Delta	GK	(N_G215C,N_D63G,N_R203M,NSP12_G671S,NSP13_I334V,NS3_V77F,NS3_S26L,Spike_P681R,Spike_R158del,NS8_V62L,NSP3_P1228L,NS7a_V82A,NSP3_A488S,Spike_F157del,NSP4_T492I,NSP14_A394V,Spike_T19R,NS7a_T120I,N_D377Y,NSP3_S794L,M_I82T,Spike_D950N,NS7b_T40I,NSP13_P77L,Spike_E156G,NSP3_P1469S,Spike_T478K,NSP6_T77A,NSP12_P323L,Spike_D614G,NSP4_V167L,Spike_L452R)
hCoV-19/USA/WI-MHDL-2021120415/2021	EPI_ISL_7935047	2021-11-29	North America / USA / Wisconsin / Milwaukee County	Human	Original	Nanopore Clear Dx	BIP-WV6	AY.103	21J	Delta	GK	(N_G215C,N_D63G,NSP2_S211F,N_R203M,NSP12_G671S,NSP13_I334V,NS3_S26L,Spike_P681R,Spike_R158del,NSP3_P1228L,NS7a_V82A,NSP3_A488S,NSP14_T16I,Spike_F157del,NSP4_T492I,NSP14_A394V,Spike_T19R,NS7a_T120I,N_D377Y,M_I82T,Spike_D950N,NS7b_S31L,NS7b_T40I,NSP13_P77L,Spike_E156G,NSP3_P1469S,Spike_T478K,NSP6_T77A,NSP12_P323L,Spike_D614G,NSP3_S1437F,NSP4_V167L,Spike_L452R)
hCoV-19/USA/WI-MHDL-2021120146/2021	EPI_ISL_7809499	2021-11-30	North America / USA / Wisconsin / Milwaukee County	Human	Original	Illumina MiSeq	DRAGEN COVID lineage v3.5.4	AY.44	21J	Delta	GK	(N_G215C,NS8_L60F,Spike_H146Y,N_D63G,N_R203M,NSP12_G671S,Spike_G142D,NS3_S26L,Spike_P681R,Spike_R158del,NSP3_P1228L,NS7a_V82A,NSP3_A488S,Spike_F157del,NSP4_T492I,NSP14_A394V,Spike_T19R,NSP12_F192V,NSP13_H164Y,M_I82T,NSP4_S137L,Spike_D950N,NS7b_T40I,NSP3_A1736V,NSP13_P77L,Spike_E156G,NSP3_H1307Y,NSP3_P1469S,Spike_T478K,NSP6_T77A,NSP12_P323L,Spike_D614G,NSP4_V167L,Spike_L452R)
hCoV-19/USA/WI-MHDL-2021120147/2021	EPI_ISL_7809500	2021-11-30	North America / USA / Wisconsin / Milwaukee County	Human	Original	Illumina MiSeq	DRAGEN COVID lineage v3.5.4	AY.44	21J	Delta	GK	(N_G215C,NS8_L60F,N_D63G,N_R203M,NSP12_G671S,NS3_S26L,Spike_P681R,Spike_R158del,NSP3_P1228L,NS7a_V82A,NSP3_A488S,Spike_F157del,NSP4_T492I,NSP14_A394V,Spike_T19R,NS7a_T120I,NSP12_F192V,N_D377Y,NSP13_H164Y,M_I82T,Spike_D950N,NS7b_T40I,NSP3_A1736V,NSP13_P77L,Spike_E156G,NSP3_H1307Y,NSP12_M756I,NSP3_P1469S,Spike_T478K,NSP6_T77A,NSP12_P323L,Spike_D614G,NSP4_V167L,Spike_L452R)
hCoV-19/USA/WI-MHDL-2021120152/2021	EPI_ISL_7809505	2021-11-30	North America / USA / Wisconsin / Milwaukee County	Human	Original	Illumina MiSeq	DRAGEN COVID lineage v3.5.4	AY.103	21J	Delta	GK	(N_G215C,N_D63G,NSP2_C177S,N_R203M,NSP3_P1662S,NSP12_G671S,NSP13_I334V,Spike_G142D,NS3_S26L,Spike_P681R,Spike_R158del,NSP3_P1228L,NS7a_V82A,NSP3_A488S,Spike_F157del,NSP4_T492I,NSP14_A394V,Spike_T19R,NS7a_T120I,N_D377Y,M_I82T,Spike_D950N,Spike_S221L,NS7b_T40I,NSP13_P77L,Spike_E156G,NSP3_P1469S,Spike_T478K,NS7a_P45L,NSP6_T77A,NSP12_P323L,Spike_D614G,NSP4_V167L,Spike_L452R,NSP4_G178S)
hCoV-19/USA/WI-MHDL-2021120312/2021	EPI_ISL_7828372	2021-11-30	North America / USA / Wisconsin / Milwaukee County	Human	Original	Illumina MiSeq	DRAGEN COVID lineage v3.5.5	AY.44	21J	Delta	GK	(N_G215C,NS8_L60F,N_R203M,NSP12_G671S,NS3_S26L,Spike_L5F,Spike_P681R,NSP3_P1228L,NSP14_V125I,NSP3_A488S,NSP4_T492I,NSP14_A394V,Spike_T19R,NSP12_F192V,NSP13_H164Y,M_I82T,Spike_D950N,NS7b_T40I,NSP3_A1736V,NSP13_P77L,NSP3_H1307Y,NSP3_P1469S,Spike_T478K,NSP6_T77A,N_D63S,NSP12_P323L,Spike_D614G,NSP4_V167L,Spike_L452R)
hCoV-19/USA/WI-MHDL-2021120313/2021	EPI_ISL_7828373	2021-11-30	North America / USA / Wisconsin / Milwaukee County	Human	Original	Illumina MiSeq	DRAGEN COVID lineage v3.5.5	AY.25	21J	Delta	GK	(N_G215C,N_D63G,N_R203M,NSP12_G671S,NS3_S26L,Spike_P681R,Spike_R158del,Spike_Y269H,NSP3_P1228L,NSP3_A488S,Spike_F157del,NSP4_T492I,NSP14_A394V,Spike_T19R,N_D377Y,M_I82T,Spike_D950N,Spike_S112L,NS7b_T40I,NSP13_P77L,Spike_E156G,NSP3_P1469S,Spike_T478K,NSP6_T77A,NS3_E239Q,NSP12_P323L,Spike_D614G,NSP4_V167L,Spike_L452R,NSP4_T295I)
hCoV-19/USA/WI-MHDL-2021120314/2021	EPI_ISL_7828374	2021-11-30	North America / USA / Wisconsin / Milwaukee County	Human	Original	Illumina MiSeq	DRAGEN COVID lineage v3.5.5	AY.25	21J	Delta	GK	(N_G215C,N_D63G,N_R203M,NSP12_G671S,Spike_G142D,NSP12_K91R,NS3_S26L,Spike_P681R,Spike_R158del,NSP3_P1228L,NS7a_V82A,NSP2_A360V,NSP3_A488S,Spike_F157del,NSP4_T492I,NSP14_A394V,Spike_T19R,NS7a_T120I,N_D377Y,M_I82T,Spike_D950N,Spike_S112L,NS7b_T40I,NSP13_P77L,Spike_E156G,Spike_P1162L,N_T247I,NSP3_P1469S,Spike_T478K,NSP6_T77A,NS3_E239Q,NSP3_T771I,NSP12_P323L,Spike_D614G,NSP4_V167L,Spike_L452R)
hCoV-19/USA/WI-MHDL-2021120315/2021	EPI_ISL_7828375	2021-11-30	North America / USA / Wisconsin / Milwaukee County	Human	Original	Illumina MiSeq	DRAGEN COVID lineage v3.5.5	AY.103	21J	Delta	GK	(N_G215C,N_D63G,N_R203M,NSP12_G671S,NSP13_I334V,Spike_G142D,NS3_S26L,Spike_P681R,Spike_R158del,NS8_C25Y,NSP3_P1228L,NSP13_T599I,NS7a_V82A,NSP3_A488S,Spike_F157del,NSP4_T492I,NSP14_A394V,Spike_T19R,NS7a_T120I,NSP12_P227L,N_D377Y,M_I82T,Spike_D950N,NS7b_T40I,NSP13_P77L,Spike_E156G,NSP3_P1469S,Spike_T478K,NSP6_T77A,NSP12_P323L,Spike_D614G,NSP4_V167L,Spike_L452R,NSP13_E341D)
hCoV-19/USA/WI-MHDL-2021120316/2021	EPI_ISL_7828376	2021-11-30	North America / USA / Wisconsin / Milwaukee County	Human	Original	Illumina MiSeq	DRAGEN COVID lineage v3.5.5	AY.44	21J	Delta	GK	(N_G215C,NS8_L60F,N_D63G,N_R203M,NSP12_G671S,Spike_G142D,NS3_S26L,Spike_P681R,Spike_R158del,NSP3_P1228L,NS7a_V82A,NSP3_A488S,Spike_F157del,NSP4_T492I,NSP14_A394V,Spike_T19R,NS7a_T120I,NSP12_F192V,N_D377Y,NSP13_H164Y,M_I82T,Spike_D950N,NS8_W45C,NS7b_T40I,NSP3_A1736V,NSP13_P77L,Spike_E156G,NSP3_H1307Y,NSP13_I333V,NSP3_P1469S,Spike_T478K,NSP6_T77A,NSP12_P323L,Spike_D614G,NSP4_V167L,Spike_L452R)
hCoV-19/USA/WI-MHDL-2021120317/2021	EPI_ISL_7828377	2021-11-30	North America / USA / Wisconsin / Milwaukee County	Human	Original	Illumina MiSeq	DRAGEN COVID lineage v3.5.5	AY.103	21J	Delta	GK	(N_G215C,N_D63G,N_R203M,NSP12_G671S,NSP3_N1934T,NSP13_I334V,Spike_G142D,NS3_S26L,Spike_P681R,Spike_R158del,NSP3_P1228L,NSP3_A488S,Spike_F157del,NSP4_T492I,NSP14_A394V,Spike_T19R,N_D377Y,M_I82T,Spike_D950N,NS7b_T40I,NSP13_P77L,Spike_E156G,NSP3_P1469S,Spike_T478K,NSP6_T77A,NSP9_T77I,NSP12_P323L,Spike_D614G,NSP4_V167L,Spike_L452R,NS7a_R25K)
hCoV-19/USA/WI-MHDL-2021120318/2021	EPI_ISL_7828378	2021-11-30	North America / USA / Wisconsin / Milwaukee County	Human	Original	Illumina MiSeq	DRAGEN COVID lineage v3.5.5	AY.103	21J	Delta	GK	(N_G215C,N_D63G,N_R203M,NSP12_G671S,NSP13_I334V,Spike_G142D,NS3_S26L,Spike_P681R,Spike_R158del,NSP3_P1228L,NS7a_V82A,NSP3_A488S,Spike_F157del,NSP4_T492I,NSP14_A394V,Spike_T19R,N_D377Y,M_I82T,Spike_D950N,NS7b_T40I,NSP13_P77L,Spike_E156G,NSP3_P1469S,Spike_T478K,NSP6_T77A,NSP12_P323L,Spike_D614G,NSP4_V167L,Spike_L452R,NSP6_V149F)
hCoV-19/USA/WI-MHDL-2021120319/2021	EPI_ISL_7828379	2021-11-30	North America / USA / Wisconsin / Milwaukee County	Human	Original	Illumina MiSeq	DRAGEN COVID lineage v3.5.5	AY.103	21J	Delta	GK	(N_G215C,N_D63G,N_R203M,NSP12_G671S,NSP13_I334V,NSP3_T1306I,Spike_G142D,NSP3_T734I,NS3_S26L,Spike_P681R,NS3_L108F,Spike_R158del,NSP3_P1228L,NSP3_A488S,Spike_F157del,NSP4_T492I,NSP14_A394V,Spike_T19R,NS7a_T120I,NSP3_S1717L,N_D377Y,M_I82T,NSP15_G17E,Spike_D950N,NS3_R134H,NSP13_P77L,Spike_E156G,NSP6_V26A,NSP3_P1469S,NS8_T87I,Spike_T478K,NSP6_T77A,NSP12_P323L,Spike_D614G,NSP3_E1799A,NSP4_V167L,Spike_…
hCoV-19/USA/WI-MHDL-2021120320/2021	EPI_ISL_7828380	2021-11-30	North America / USA / Wisconsin / Milwaukee County	Human	Original	Illumina MiSeq	DRAGEN COVID lineage v3.5.5	AY.44	21J	Delta	GK	(N_G215C,NS8_L60F,N_D63G,N_R203M,NSP12_G671S,Spike_G142D,NS3_S26L,Spike_P681R,Spike_R158del,NSP3_P1228L,Spike_W886L,NS3_G172C,NS7a_V82A,NSP3_A488S,Spike_F157del,NSP4_T492I,NSP14_A394V,Spike_T19R,NS7a_T120I,NSP12_F192V,N_D377Y,NSP13_H164Y,M_I82T,Spike_D950N,NS7b_T40I,NSP3_A1736V,N_T362I,NSP13_P77L,Spike_E156G,NSP3_H1307Y,NS3_M260T,NSP3_P1469S,Spike_T478K,NS3_T151I,NSP6_T77A,NSP12_P323L,Spike_D614G…
hCoV-19/USA/WI-MHDL-2022010123/2021	EPI_ISL_8565326	2021-11-30	North America / USA / Wisconsin / Milwaukee County	Human	Original	Illumina MiSeq	DRAGEN COVID lineage v3.5.5	AY.103	21J	Delta	GK	(N_G215C,N_D63G,N_R203M,NSP12_G671S,NSP13_I334V,Spike_G142D,NS3_S26L,NS8_C37S,Spike_P681R,Spike_R158del,NSP3_P1228L,NS7a_V82A,NSP3_A488S,Spike_F157del,NSP4_T492I,NSP14_A394V,Spike_T19R,NS7a_T120I,N_D377Y,M_I82T,Spike_D950N,NS7b_T40I,NSP13_P77L,Spike_E156G,NSP3_P1469S,Spike_A1078S,Spike_T478K,Spike_G181V,NSP6_T77A,NSP12_P323L,Spike_D614G,N_D22A,NSP4_V167L,Spike_L452R)
hCoV-19/USA/WI-MHDL-2022010124/2021	EPI_ISL_8565327	2021-11-30	North America / USA / Wisconsin / Milwaukee County	Human	Original	Illumina MiSeq	DRAGEN COVID lineage v3.5.5	AY.103	21J	Delta	GK	(N_G215C,N_D63G,N_R203M,NSP12_G671S,NSP13_I334V,Spike_G142D,NS3_S26L,NSP8_P178H,Spike_P681R,Spike_R158del,NS7a_V82A,NSP3_A488S,Spike_F157del,NSP4_T492I,NSP14_A394V,Spike_T19R,NS7a_T120I,N_D377Y,NSP2_V495F,M_I82T,Spike_D950N,NS7b_T40I,NSP12_N150H,NSP13_P77L,Spike_E156G,NSP3_P1469S,Spike_T478K,NSP6_T77A,NSP12_P323L,Spike_D614G,NSP4_V167L,Spike_L452R)
hCoV-19/USA/WI-MHDL-2022010140/2021	EPI_ISL_8565337	2021-11-30	North America / USA / Wisconsin / Milwaukee County	Human	Original	Illumina MiSeq	DRAGEN COVID lineage v3.5.5	AY.103	21J	Delta	GK	(N_G215C,N_D63G,N_R203M,NSP12_G671S,NSP13_I334V,Spike_G142D,NS3_S26L,Spike_P681R,Spike_R158del,NS8_C25Y,NSP3_P1228L,NS7a_V82A,NSP3_A488S,Spike_F157del,NSP4_T492I,NSP14_A394V,Spike_T19R,NS7a_T120I,NSP12_P227L,N_D377Y,M_I82T,Spike_D950N,NS7b_T40I,NSP13_P77L,Spike_E156G,NSP8_K37N,NSP3_P1469S,Spike_T478K,NSP6_L260F,NSP6_T77A,NSP12_P323L,Spike_D614G,NSP4_V167L,Spike_L452R)
hCoV-19/USA/WI-MHDL-2022010141/2021	EPI_ISL_8565338	2021-11-30	North America / USA / Wisconsin / Milwaukee County	Human	Original	Illumina MiSeq	DRAGEN COVID lineage v3.5.5	AY.3	21J	Delta	GK	(N_G215C,N_D63G,N_R203M,NSP12_G671S,NSP6_I162V,NS6_P57S,Spike_G142D,NSP12_A581T,NS3_S26L,Spike_P681R,Spike_R158del,NS7a_V82A,NSP3_A488S,Spike_F157del,NSP4_T492I,NSP14_A394V,Spike_T19R,NS7a_T120I,N_D377Y,M_I82T,Spike_D950N,NS7b_T40I,NSP13_P77L,Spike_E156G,N_T205I,NSP3_P1469S,Spike_T478K,NSP6_T77A,NSP12_P323L,N_Q9H,NSP5_K90R,Spike_D614G,NSP4_V167L,Spike_L452R)
hCoV-19/USA/WI-MHDL-2022010142/2021	EPI_ISL_8565339	2021-11-30	North America / USA / Wisconsin / Milwaukee County	Human	Original	Illumina MiSeq	DRAGEN COVID lineage v3.5.5	AY.25	21J	Delta	GK	(N_G215C,N_D63G,N_R203M,NS7a_A105V,NSP12_G671S,NSP16_Q238H,NSP2_G339S,Spike_G142D,NS3_S26L,NSP12_L869F,Spike_P681R,Spike_R158del,NSP3_P1228L,NSP4_A146V,N_Q289H,NS7a_V82A,NSP3_A488S,Spike_F157del,NSP4_T492I,NSP14_A394V,Spike_T19R,NS7a_T120I,NS3_W45R,N_D377Y,M_I82T,Spike_D950N,Spike_S112L,NS7b_T40I,NSP13_P77L,NSP15_I305V,Spike_E156G,NSP3_P1469S,NSP12_M902W,NSP13_A520T,Spike_T478K,NSP6_T77A,NS3_E239…
hCoV-19/USA/WI-MHDL-2022010143/2021	EPI_ISL_8565340	2021-11-30	North America / USA / Wisconsin / Milwaukee County	Human	Original	Illumina MiSeq	DRAGEN COVID lineage v3.5.5	AY.103	21J	Delta	GK	(N_G215C,N_D63G,N_R203M,NSP8_T145I,NSP12_G671S,NSP13_I334V,Spike_G142D,NS3_S26L,Spike_P681R,Spike_R158del,NSP3_P1228L,NS7a_V82A,NS8_R115C,NSP3_A488S,Spike_F157del,NSP4_T492I,NSP14_A394V,Spike_T19R,NS7a_T120I,Spike_Q613H,N_D377Y,M_I82T,Spike_D950N,NS7b_T40I,NSP13_P77L,Spike_E156G,NSP3_P1469S,Spike_T478K,NSP6_T77A,NSP15_V66L,NSP12_P323L,Spike_D614G,NSP4_V167L,Spike_L452R,NSP2_G147C)
hCoV-19/USA/WI-MHDL-2022010144/2021	EPI_ISL_8565341	2021-11-30	North America / USA / Wisconsin / Milwaukee County	Human	Original	Illumina MiSeq	DRAGEN COVID lineage v3.5.5	AY.119	21J	Delta	GK	(N_G215C,Spike_P809S,Spike_T95I,N_D63G,N_R203M,NSP15_A81V,NSP12_G671S,NSP1_M174T,Spike_G142D,NS3_S26L,Spike_P681R,Spike_R158del,NSP3_P1228L,NSP9_T24I,NS7a_V82A,NSP3_A488S,Spike_F157del,NSP4_T492I,NSP14_A394V,Spike_T19R,NS7a_T120I,N_D377Y,M_I82T,Spike_D950N,NS7b_T40I,NSP13_P77L,NSP14_A323S,Spike_E156G,NSP3_P1469S,NSP4_A92V,Spike_T478K,NSP6_T77A,NSP12_P323L,Spike_D614G,NSP4_V167L,Spike_L452R)
hCoV-19/USA/WI-MHDL-2021120047/2021	EPI_ISL_7281492	2021-11-30	North America / USA / Wisconsin / Milwaukee County	Human	Original	Nanopore Clear Dx	BIP-WV6	AY.103	21J	Delta	GK	(N_G215C,N_D63G,N_R203M,NSP12_G671S,NSP13_I334V,NSP2_I343V,NSP5_S46P,NS3_S26L,Spike_P681R,Spike_R158del,NS8_V62L,NSP3_P1228L,NS7a_V82A,NSP3_A488S,Spike_F157del,NSP4_T492I,NSP14_A394V,Spike_T19R,NS7a_T120I,NSP16_Y222C,N_D377Y,M_I82T,Spike_D950N,NS7b_T40I,NSP13_P77L,Spike_E156G,NSP3_P1469S,Spike_T478K,NSP6_T77A,NSP14_S137I,NSP12_P323L,Spike_D614G,NSP4_V167L,Spike_L452R,NSP4_S218F)
hCoV-19/USA/WI-MHDL-2021120048/2021	EPI_ISL_7281499	2021-11-30	North America / USA / Wisconsin / Milwaukee County	Human	Original	Nanopore Clear Dx	BIP-WV6	AY.119	21J	Delta	GK	(N_G215C,Spike_P809S,N_D63G,N_R203M,NSP12_G671S,NS7a_I110del,Spike_G946R,NS3_S26L,Spike_P681R,Spike_R158del,NSP3_P1228L,NS7a_V82A,NSP3_A488S,Spike_F157del,NSP4_T492I,NSP14_A394V,Spike_T19R,NS7a_T120I,N_D377Y,M_I82T,Spike_D950N,Spike_N679K,NS7b_T40I,NSP13_P77L,NSP14_A323S,Spike_E156G,NSP3_P1469S,NSP3_I1409V,NSP4_A92V,Spike_T478K,NSP6_T77A,NSP12_P323L,Spike_D614G,NSP3_V1635I,NSP4_V167L,Spike_L452R)
hCoV-19/USA/WI-MHDL-2021120049/2021	EPI_ISL_7281507	2021-11-30	North America / USA / Wisconsin / Milwaukee County	Human	Original	Nanopore Clear Dx	BIP-WV6	AY.103	21J	Delta	GK	(N_G215C,N_D63G,N_R203M,NSP12_G671S,NSP13_I334V,NSP3_T942I,NS3_S26L,NSP3_T611I,Spike_P681R,Spike_R158del,NSP3_P1228L,NS7a_V82A,NSP3_A488S,Spike_F157del,NSP4_T492I,NSP14_A394V,Spike_T19R,NS7a_T120I,NS7b_L32F,N_D377Y,M_I82T,Spike_D950N,NS7b_T40I,NSP13_P77L,Spike_E156G,NSP3_P1469S,NSP12_A382T,Spike_T478K,NS8_A14S,NSP6_T77A,NSP12_P323L,NSP16_R216N,Spike_D614G,NSP4_V167L,Spike_L452R)
hCoV-19/USA/WI-MHDL-2021120054/2021	EPI_ISL_7281548	2021-11-30	North America / USA / Wisconsin / Milwaukee County	Human	Original	Nanopore Clear Dx	BIP-WV6	AY.103	21J	Delta	GK	(N_G215C,N_D63G,N_A208S,N_R203M,NSP12_G671S,NSP13_I334V,NS3_P104S,NS3_S26L,NSP3_A579T,Spike_P681R,Spike_R158del,NSP3_P1228L,NS7a_V82A,NSP3_A488S,Spike_F157del,NSP4_T492I,Spike_Q677H,NSP14_A394V,Spike_T19R,NS7a_T120I,N_D377Y,M_I82T,Spike_D950N,NS7b_T40I,NSP13_P77L,Spike_E156G,NSP3_P1469S,Spike_T478K,NSP6_T77A,NSP12_P323L,Spike_D614G,NSP4_V167L,Spike_L452R)
hCoV-19/USA/WI-MHDL-2021120055/2021	EPI_ISL_7309361	2021-11-30	North America / USA / Wisconsin / Milwaukee County	Human	Original	Nanopore Clear Dx	BIP-WV6	AY.103	21J	Delta	GK	(N_G215C,N_D63G,N_R203M,NSP12_G671S,NSP13_I334V,NSP1_M85V,NS3_S26L,Spike_K182I,NSP8_P178H,Spike_P681R,Spike_R158del,NSP3_P1228L,NS7a_V82A,NSP3_A488S,Spike_F157del,NSP4_T492I,NSP14_A394V,Spike_T19R,NS7a_T120I,N_D377Y,M_I82T,Spike_D950N,NS7b_T40I,NSP13_P77L,Spike_E156G,NSP3_P1469S,Spike_T478K,NSP6_T77A,NSP12_P323L,Spike_D614G,NSP4_V167L,Spike_L452R)
hCoV-19/USA/WI-MHDL-2021120155/2021	EPI_ISL_7364685	2021-11-30	North America / USA / Wisconsin / Milwaukee County	Human	Original	Nanopore Clear Dx	BIP-WV6	AY.25	21J	Delta	GK	(N_G215C,N_D63G,N_R203M,NSP12_G671S,NS3_S26L,Spike_P681R,Spike_R158del,NSP3_P1228L,NS7a_V82A,NSP3_A488S,Spike_F157del,NSP4_T492I,NSP14_A394V,Spike_T19R,NS7a_T120I,NSP12_I779V,N_D377Y,M_I82T,NS3_V50I,Spike_D950N,NS7b_T40I,NSP13_P77L,Spike_E156G,NSP3_P1469S,Spike_T478K,NSP6_T77A,NS3_E239Q,NSP9_R39K,NSP12_P323L,N_A152S,Spike_D614G,NSP4_V167L,Spike_L452R,NSP16_K160R)
hCoV-19/USA/WI-MHDL-2021120164/2021	EPI_ISL_7364697	2021-11-30	North America / USA / Wisconsin / Milwaukee County	Human	Original	Nanopore Clear Dx	BIP-WV6	AY.25	21J	Delta	GK	(N_G215C,N_D63G,N_R203M,NSP12_G671S,NS6_N39T,NS3_S26L,Spike_P681R,Spike_R158del,NSP3_P1228L,NS7a_V82A,NSP3_A488S,Spike_F157del,NSP4_T492I,NSP14_A394V,Spike_T19R,NS7a_T120I,N_D377Y,M_I82T,Spike_D950N,NS7b_T40I,NSP13_P77L,Spike_E156G,NSP3_P1469S,Spike_T478K,NSP6_T77A,NS3_E239Q,NSP9_R39K,NSP12_P323L,Spike_D614G,NS3_E181V,NSP4_V167L,Spike_L452R,NS7a_T111I,N_A90S)
hCoV-19/USA/WI-MHDL-2021120342/2021	EPI_ISL_7698317	2021-11-30	North America / USA / Wisconsin / Milwaukee County	Human	Original	Nanopore Clear Dx	BIP-WV6	AY.103	21J	Delta	GK	(N_G215C,N_D63G,N_R203M,NS3_H78Y,NSP12_G671S,NSP13_I334V,NS3_S26L,NSP8_P178H,Spike_P681R,Spike_R158del,NSP3_P1228L,NS7a_V82A,NSP3_A488S,Spike_F157del,NSP4_T492I,NSP4_L353F,NSP14_A394V,Spike_T19R,NS7a_T120I,N_D377Y,M_I82T,Spike_D950N,NS7b_T40I,NSP13_P77L,Spike_E156G,NSP3_P1469S,Spike_T478K,NSP6_T77A,NSP4_T114I,NSP12_P323L,Spike_D614G,NSP4_V167L,Spike_L452R)
hCoV-19/USA/WI-MHDL-2021120344/2021	EPI_ISL_7698319	2021-11-30	North America / USA / Wisconsin / Milwaukee County	Human	Original	Nanopore Clear Dx	BIP-WV6	AY.100	21J	Delta	GK	(N_G215C,Spike_T95I,N_D63G,N_R203M,NSP12_G671S,NS3_L41F,NSP2_T223I,Spike_G142D,NS3_S26L,NSP13_A296S,Spike_P681R,Spike_R158del,NSP3_P1228L,NSP3_L1791F,NS7a_V82A,NSP3_A488S,Spike_F157del,NSP4_T492I,NSP14_A394V,Spike_T19R,NS7a_T120I,Spike_L18F,N_D377Y,M_I82T,Spike_D950N,NS7b_T40I,NSP13_P77L,Spike_E156G,NSP3_P1469S,Spike_T478K,NSP6_T77A,NSP12_P323L,Spike_D614G,NSP4_V167L,Spike_L452R)
hCoV-19/USA/WI-MHDL-2021120348/2021	EPI_ISL_7698322	2021-11-30	North America / USA / Wisconsin / Milwaukee County	Human	Original	Nanopore Clear Dx	BIP-WV6	AY.44	21J	Delta	GK	(N_G215C,NS8_L60F,N_D63G,N_R203M,NSP12_G671S,NS3_S26L,NSP2_P624S,Spike_P681R,Spike_R158del,NSP3_P1228L,NSP3_P340S,NS7a_V82A,NSP3_A488S,Spike_F157del,NSP4_T492I,NSP14_A394V,Spike_T19R,NS7a_T120I,NSP12_F192V,N_D377Y,NSP13_H164Y,M_I82T,Spike_D950N,NS7b_T40I,NSP3_A1736V,NSP2_S122Y,NSP13_P77L,Spike_E156G,NSP3_H1307Y,NSP3_P1469S,Spike_T478K,N_R40H,NSP6_T77A,NSP3_V418F,NSP12_P323L,Spike_D614G,NSP4_V167L…
hCoV-19/USA/WI-MHDL-2021120350/2021	EPI_ISL_7698327	2021-11-30	North America / USA / Wisconsin / Milwaukee County	Human	Original	Nanopore Clear Dx	BIP-WV6	AY.103	21J	Delta	GK	(N_G215C,N_D63G,N_R203M,NSP12_G671S,NSP13_I334V,NS3_S26L,Spike_P681R,Spike_R158del,NSP3_P1228L,NS7a_V82A,NSP3_A488S,Spike_F157del,NSP4_T492I,NSP14_A394V,Spike_T19R,NS7a_T120I,N_D377Y,M_I82T,Spike_D950N,Spike_N556K,NS7b_T40I,NSP13_P77L,Spike_E156G,NSP3_P1469S,NSP6_T77A,NSP12_P323L,Spike_D614G,NSP4_V167L,NSP13_M274I)
hCoV-19/USA/WI-MHDL-2021120345/2021	EPI_ISL_7744146	2021-11-30	North America / USA / Wisconsin / Milwaukee County	Human	Original	Nanopore Clear Dx	BIP-WV6	AY.103	21J	Delta	GK	(N_G215C,NS3_A110C,NS3_G100L,N_R203M,NSP12_G671S,NSP13_I334V,Spike_G142D,NSP14_T372I,NS3_S92A,NS3_S117A,NS3_F120L,NSP3_P1228L,NS3_Y107T,NS3_L106I,NS3_C133del,NS3_F87L,NS7a_V82A,NS3_L129stop,NSP4_T492I,Spike_T19R,NS7a_T120I,NS3_I124L,NS3_L111Q,NS3_L147R,M_I82T,NS3_A143C,Spike_D950N,NS7b_T40I,NS3_M125Y,NS3_A103M,NS3_V121L,NS3_L139N,NS3_Y113F,NSP3_P1469S,NSP3_K462N,NS3_C148stop,NS3_K132del,NS3_W131d…
hCoV-19/USA/WI-MHDL-2021120413/2021	EPI_ISL_7877066	2021-11-30	North America / USA / Wisconsin / Milwaukee County	Human	Original	Nanopore Clear Dx	BIP-WV6	AY.25	21J	Delta	GK	(N_G215C,N_D63G,N_R203M,NSP12_G671S,NS3_S26L,Spike_P681R,Spike_R158del,NSP3_P1228L,NSP13_M233I,NS7a_V82A,NSP3_A488S,Spike_F157del,NSP4_T492I,NSP14_A394V,Spike_T19R,NS7a_T120I,N_D377Y,M_I82T,Spike_D950N,NS7b_T40I,NSP13_P77L,Spike_E156G,NSP3_P1469S,Spike_T478K,NSP6_T77A,NS3_E239Q,NSP12_P323L,Spike_D614G,NSP4_V167L,Spike_L452R,NSP3_I1239M)
hCoV-19/USA/WI-MHDL-2021120140/2021	EPI_ISL_7809493	2021-12-01	North America / USA / Wisconsin / Milwaukee County	Human	Original	Illumina MiSeq	DRAGEN COVID lineage v3.5.4	AY.100	21J	Delta	GK	(N_G215C,N_D63G,NSP12_G671S,NSP4_G288C,NS3_S26L,NSP13_A296S,Spike_P681R,Spike_R158del,NSP3_P1228L,NSP3_A488S,Spike_F157del,NSP4_T492I,NSP14_A394V,Spike_T19R,N_D377Y,M_I82T,Spike_D950N,NS7b_T40I,NS3_I118V,NSP13_P77L,Spike_E156G,NS3_E102Q,NSP3_P1469S,NS8_Y31F,Spike_T478K,NSP6_T77A,NSP12_P323L,Spike_D614G,NSP4_V167L,Spike_L452R,N_E31A,N_R203V)
hCoV-19/USA/WI-MHDL-2021120141/2021	EPI_ISL_7809494	2021-12-01	North America / USA / Wisconsin / Waukesha County	Human	Original	Illumina MiSeq	DRAGEN COVID lineage v3.5.4	AY.44	21J	Delta	GK	(N_G215C,NS8_L60F,N_R203M,NSP12_G671S,NS3_I236V,Spike_G142D,NS3_S26L,Spike_P681R,Spike_R158del,NSP3_P1228L,NS7a_V82A,NSP3_A488S,Spike_F157del,NSP4_T492I,Spike_Q677H,NSP14_A394V,Spike_T19R,NS7a_T120I,NSP12_F192V,N_D377Y,NSP13_H164Y,M_I82T,Spike_D950N,NS7b_T40I,NSP3_A1736V,NSP13_P77L,Spike_E156G,NSP3_H1307Y,NSP3_P1469S,NSP3_D1283Y,Spike_T478K,NSP6_T77A,N_D63S,NSP12_P323L,Spike_D614G,NSP4_V167L,Spik…
hCoV-19/USA/WI-MHDL-2021120142/2021	EPI_ISL_7809495	2021-12-01	North America / USA / Wisconsin / Milwaukee County	Human	Original	Illumina MiSeq	DRAGEN COVID lineage v3.5.4	AY.25	21J	Delta	GK	(NSP3_A1800V,N_G215C,N_D63G,N_R203M,NS7a_A105V,NSP12_G671S,NSP2_A318V,NS3_S26L,Spike_P681R,Spike_R158del,NSP3_P1228L,NS7a_V82A,NSP3_A488S,Spike_F157del,Spike_P479S,NSP4_T492I,NSP14_A394V,Spike_T19R,NS7a_T120I,NSP3_D1764N,N_D377Y,M_I82T,Spike_D950N,Spike_S112L,NS7b_T40I,NSP13_P77L,NSP15_I305V,Spike_E156G,Spike_T604I,NSP3_P1469S,Spike_T478K,NSP6_T77A,NS3_E239Q,NSP12_T26I,NSP12_P323L,Spike_D614G,NSP…
hCoV-19/USA/WI-MHDL-2021120143/2021	EPI_ISL_7809496	2021-12-01	North America / USA / Wisconsin / Milwaukee County	Human	Original	Illumina MiSeq	DRAGEN COVID lineage v3.5.4	AY.103	21J	Delta	GK	(N_G215C,N_D63G,N_A208S,N_R203M,NSP12_G671S,NSP13_I334V,NSP2_G339S,Spike_G142D,NS3_P104S,NS3_S26L,Spike_P681R,Spike_R158del,NSP3_P1228L,NSP1_R43H,NSP3_A488S,Spike_F157del,NSP4_T492I,NSP14_A394V,Spike_T19R,N_D377Y,M_I82T,Spike_D950N,NS7b_T40I,NSP13_P77L,NS3_P42L,Spike_E156G,NSP3_P1469S,Spike_T478K,NSP6_T77A,NSP12_P323L,Spike_D614G,NSP3_S1437F,NSP4_V167L,Spike_L452R)
hCoV-19/USA/WI-MHDL-2021120144/2021	EPI_ISL_7809497	2021-12-01	North America / USA / Wisconsin / Milwaukee County	Human	Original	Illumina MiSeq	DRAGEN COVID lineage v3.5.4	AY.100	21J	Delta	GK	(N_G215C,Spike_T95I,N_D63G,N_R203M,NSP12_G671S,NSP2_T223I,NS3_S26L,NSP13_A296S,Spike_P681R,Spike_R158del,NSP3_P1228L,NSP3_T350I,NS7a_V82A,NSP3_A488S,Spike_F157del,NSP4_T492I,NSP14_A394V,Spike_T19R,NS7a_T120I,N_D377Y,M_I82T,Spike_D950N,NS7b_T40I,NSP13_P77L,Spike_A1070S,Spike_E156G,NSP3_P1469S,Spike_T478K,NSP6_T77A,NSP12_P323L,Spike_D614G,NSP4_V167L,Spike_L452R,NS3_S171L)
hCoV-19/USA/WI-MHDL-2021120145/2021	EPI_ISL_7809498	2021-12-01	North America / USA / Wisconsin / Milwaukee County	Human	Original	Illumina MiSeq	DRAGEN COVID lineage v3.5.4	AY.25	21J	Delta	GK	(N_G215C,N_D63G,N_R203M,NSP12_G671S,NSP16_M270I,Spike_G142D,NS3_S26L,Spike_P681R,Spike_R158del,NSP12_A379V,NSP3_P1228L,NSP14_A100S,NS7a_V82A,NSP3_A488S,Spike_F157del,NSP4_T492I,NSP14_A394V,Spike_T19R,NS7a_T120I,N_D377Y,M_I82T,Spike_D950N,NSP16_T35I,Spike_S112L,NS7b_T40I,NSP13_P77L,Spike_E156G,NSP3_P1469S,Spike_T478K,NSP6_T77A,NS3_E239Q,NSP12_P323L,Spike_D614G,NSP4_V167L,Spike_L452R)
hCoV-19/USA/WI-MHDL-2021120148/2021	EPI_ISL_7809501	2021-12-01	North America / USA / Wisconsin / Milwaukee County	Human	Original	Illumina MiSeq	DRAGEN COVID lineage v3.5.4	AY.25.1	21J	Delta	GK	(Spike_N185D,N_G215C,N_D63G,N_R203M,NSP12_G671S,NS3_S26L,Spike_P681R,Spike_R158del,NSP3_P1228L,NS7a_V82A,NSP3_A488S,Spike_F157del,NSP4_T492I,NSP14_A394V,Spike_T19R,NS7a_T120I,N_D377Y,M_I82T,NSP6_C197F,Spike_D950N,N_M234I,NS7b_T40I,NSP13_P77L,NS8_Y31H,Spike_E156G,NS3_Q17H,NSP15_T285A,NSP3_P1469S,Spike_T478K,NSP6_T77A,NS3_E239Q,NSP12_P323L,Spike_D614G,NSP4_V167L,Spike_L452R,NSP3_D410G)
hCoV-19/USA/WI-MHDL-2021120150/2021	EPI_ISL_7809503	2021-12-01	North America / USA / Wisconsin / Milwaukee County	Human	Original	Illumina MiSeq	DRAGEN COVID lineage v3.5.4	AY.44	21J	Delta	GK	(N_G215C,NS8_L60F,NSP3_P1292L,N_D63G,N_R203M,NSP12_G671S,Spike_G142D,NS3_S26L,Spike_E1150D,Spike_P681R,Spike_R158del,NSP3_P1228L,NSP3_L1078F,NS7a_V82A,NSP3_A488S,Spike_F157del,NSP4_T492I,NSP14_A394V,Spike_T19R,NS7a_T120I,NSP12_F192V,N_D377Y,NSP13_H164Y,M_I82T,Spike_D950N,NS8_W45C,NS7b_T40I,NSP3_A1736V,NSP13_P77L,Spike_E156G,NSP3_H1307Y,NSP3_P1469S,Spike_T478K,NSP6_T77A,NSP12_P323L,Spike_D614G,NSP…
hCoV-19/USA/WI-MHDL-2021120154/2021	EPI_ISL_7809507	2021-12-01	North America / USA / Wisconsin / Milwaukee County	Human	Original	Illumina MiSeq	DRAGEN COVID lineage v3.5.4	AY.113	21J	Delta	GK	(N_G215C,Spike_T95I,N_D63G,N_R203M,NSP12_G671S,NSP12_P264S,NS8_V33F,NS3_S26L,NSP15_D91G,Spike_P681R,Spike_R158del,NSP3_P1228L,NSP4_T204I,NS7a_V82A,NSP3_A488S,Spike_F157del,NSP4_T492I,NSP14_A394V,Spike_T19R,NS7a_T120I,N_D377Y,M_I82T,Spike_D950N,NS7b_T40I,NSP13_P77L,Spike_E156G,NSP3_P1469S,Spike_T478K,NSP15_N82S,NSP6_T77A,NSP12_P323L,NSP5_K90R,Spike_D614G,NSP4_V167L,Spike_L452R)
hCoV-19/USA/WI-MHDL-2022010145/2021	EPI_ISL_8565342	2021-12-01	North America / USA / Wisconsin / Milwaukee County	Human	Original	Illumina MiSeq	DRAGEN COVID lineage v3.5.5	AY.37	21I	Delta	GK	(N_D63G,N_R203M,NSP12_G671S,Spike_G142D,NSP6_T181I,NS3_S26L,Spike_P681R,Spike_R158del,N_P122L,NS7a_V82A,Spike_F157del,Spike_T19R,NS7a_T120I,Spike_A222V,N_D377Y,M_I82T,NSP6_V149A,NSP2_E460D,Spike_D950N,NSP3_P822L,NSP13_P77L,Spike_V367L,Spike_E156G,NSP4_A446V,Spike_T478K,NSP14_H455Y,NSP14_P43L,NSP12_P323L,Spike_D614G,NSP6_L37F,NSP14_I338L,Spike_L452R,NSP12_K59N,NSP3_A534V)
hCoV-19/USA/WI-MHDL-2022010146/2021	EPI_ISL_8565343	2021-12-01	North America / USA / Wisconsin / Milwaukee County	Human	Original	Illumina MiSeq	DRAGEN COVID lineage v3.5.5	AY.44	21J	Delta	GK	(N_G215C,NS8_L60F,N_D63G,N_R203M,NSP12_G671S,Spike_G142D,NS3_S26L,Spike_P681R,Spike_R158del,NSP3_P1228L,NSP7_I68T,NS7a_V82A,NSP3_A488S,Spike_F157del,NSP4_T492I,NSP14_A394V,Spike_T19R,NS7a_T120I,NSP12_F192V,N_D377Y,NSP13_H164Y,M_I82T,Spike_D950N,NS7b_T40I,NSP3_A1736V,NSP13_P77L,Spike_E156G,NSP3_H1307Y,Spike_T604I,NSP3_P1469S,Spike_T478K,NSP6_T77A,NSP12_P323L,Spike_D614G,NSP4_V167L,Spike_L452R)
hCoV-19/USA/WI-MHDL-2022010214/2021	EPI_ISL_8565398	2021-12-01	North America / USA / Wisconsin / Milwaukee County	Human	Original	Illumina MiSeq	DRAGEN COVID lineage v3.5.5	AY.103	21J	Delta	GK	(N_G215C,N_D63G,N_R203M,NSP12_G671S,NSP13_I334V,Spike_G142D,NS3_S26L,NS8_C37S,Spike_P681R,Spike_R158del,NSP3_P1228L,NS7a_V82A,NSP3_A488S,Spike_F157del,NSP4_T492I,NSP14_A394V,Spike_T19R,NS7a_T120I,N_D377Y,M_I82T,Spike_D950N,NS7b_T40I,NSP13_P77L,Spike_E156G,NSP3_P1469S,Spike_A1078S,Spike_T478K,Spike_G181V,NSP12_P323L,Spike_D614G,N_D22A,NSP4_V167L,Spike_L452R)
hCoV-19/USA/WI-MHDL-2021120166/2021	EPI_ISL_7364701	2021-12-01	North America / USA / Wisconsin / Milwaukee County	Human	Original	Nanopore Clear Dx	BIP-WV6	BA.1.17	21K	Omicron	GRA	(NSP5_P132H,Spike_H69del,Spike_T95I,Spike_A67V,NSP6_S106del,Spike_N969K,Spike_H655Y,Spike_N856K,N_R203K,Spike_G142D,NSP3_A1892T,Spike_Q954H,Spike_G339D,N_P13L,NSP3_L1266I,N_R32del,NSP3_S1265del,NSP14_I42V,Spike_P681H,Spike_Y144del,M_Q19E,N_S33del,NSP4_T492I,NSP6_L105del,Spike_N679K,Spike_N764K,NSP6_G107del,N_E31del,NSP3_K38R,NSP6_I189V,Spike_T547K,M_D3G,Spike_D796Y,N_G204R,E_T9I,Spike_V70del,Spik…
hCoV-19/USA/WI-MHDL-2021120469/2021	EPI_ISL_7979289	2021-12-01	North America / USA / Wisconsin / Milwaukee County	Human	Original	Nanopore Clear Dx	BIP-WV6	AY.103	21J	Delta	GK	(N_G215C,N_D63G,N_R203M,NSP12_G671S,NSP13_I334V,NSP14_T372I,NS3_S26L,NSP8_P178H,Spike_P681R,Spike_R158del,NSP3_P1228L,NS7a_V82A,NSP3_A488S,Spike_F157del,NSP4_T492I,NSP14_A394V,Spike_T19R,NS7a_T120I,N_D377Y,M_I82T,Spike_D950N,NS7b_T40I,NSP13_P77L,Spike_E156G,NSP3_P1469S,NSP3_K462N,Spike_T478K,NSP6_T77A,NSP12_P323L,Spike_D614G,NSP4_V167L,Spike_L452R,NSP3_L1126S)
hCoV-19/USA/WI-MHDL-2021120470/2021	EPI_ISL_7979290	2021-12-01	North America / USA / Wisconsin / Milwaukee County	Human	Original	Nanopore Clear Dx	BIP-WV6	AY.103	21J	Delta	GK	(N_G215C,N_D63G,N_R203M,NSP12_G671S,NSP13_I334V,NS3_S26L,Spike_P681R,Spike_R158del,NSP3_P1228L,NS7a_V82A,NSP3_A488S,Spike_F157del,NSP4_T492I,NSP14_A394V,Spike_T19R,NS7a_T120I,N_D377Y,M_I82T,Spike_D950N,NS7b_T40I,NSP13_P77L,Spike_E156G,NSP3_P1469S,Spike_T478K,Spike_A623V,NSP6_T77A,NSP12_P323L,Spike_D614G,Spike_L452R,NSP4_V167L)
hCoV-19/USA/WI-MHDL-2021120471/2021	EPI_ISL_7979291	2021-12-01	North America / USA / Wisconsin / Milwaukee County	Human	Original	Nanopore Clear Dx	BIP-WV6	AY.103	21J	Delta	GK	(N_G215C,N_D63G,N_R203M,NSP12_G671S,NSP13_I334V,NSP4_S336L,NS3_S26L,Spike_P681R,Spike_R158del,NSP3_P1228L,NS7a_V82A,NSP3_A488S,Spike_F157del,NSP4_T492I,NSP14_A394V,Spike_T19R,NS7a_T120I,N_D377Y,M_I82T,Spike_D950N,NS7b_T40I,NSP13_P77L,Spike_E156G,NS8_R115S,NSP3_P1469S,Spike_T478K,NS7a_P45L,NSP6_T77A,NSP2_W450C,NSP12_P323L,Spike_D614G,NSP4_V167L,Spike_L452R)
hCoV-19/USA/WI-MHDL-2021120472/2021	EPI_ISL_7979292	2021-12-01	North America / USA / Wisconsin / Milwaukee County	Human	Original	Nanopore Clear Dx	BIP-WV6	AY.103	21J	Delta	GK	(NSP10_L138F,NSP3_P1187S,N_G215C,N_D63G,N_R203M,NSP2_A336V,NSP12_G671S,NSP13_I334V,NS3_W131C,NS3_S26L,Spike_P681R,Spike_R158del,NSP3_P1228L,NS7a_V82A,NSP3_A488S,Spike_F157del,NS8_P36S,NSP4_T492I,NSP14_A394V,Spike_T19R,NS7a_T120I,NSP14_K349Q,N_D377Y,M_I82T,NSP13_P300L,Spike_D950N,NS7b_T40I,NSP3_K408N,NSP13_P77L,Spike_E156G,NSP3_V1315A,NSP3_P1469S,NSP6_D267A,Spike_T478K,NSP6_T77A,NSP12_P323L,Spike_…
hCoV-19/USA/WI-MHDL-2022010091/2021	EPI_ISL_8594404	2021-12-01	North America / USA / Wisconsin / Milwaukee County	Human	Original	Nanopore Clear Dx	BIP-WV6	AY.103	21J	Delta	GK	(N_G215C,N_D63G,N_R203M,NSP12_G671S,NSP13_I334V,NS3_S26L,NS8_C37S,Spike_P681R,NSP3_P1228L,NS7a_V82A,NSP3_A488S,NSP4_T492I,NSP14_A394V,Spike_T19R,NS7a_T120I,N_D377Y,M_I82T,Spike_D950N,NS7b_T40I,NSP13_P77L,NSP3_P1469S,Spike_A1078S,Spike_T478K,NSP12_P323L,Spike_D614G,N_D22A,Spike_L452R,NSP4_V167L)
hCoV-19/USA/WI-MHDL-2022010092/2021	EPI_ISL_8594405	2021-12-01	North America / USA / Wisconsin / Milwaukee County	Human	Original	Nanopore Clear Dx	BIP-WV6	AY.25	21J	Delta	GK	(N_G215C,N_D63G,N_R203M,NSP12_G671S,NS3_S26L,Spike_P681R,Spike_R158del,Spike_Y269H,NSP3_P1228L,NS7a_V82A,NSP3_A488S,Spike_F157del,NSP4_T492I,NSP14_A394V,Spike_T19R,NS7a_T120I,N_D377Y,M_I82T,Spike_D950N,NS7b_T40I,NSP13_P77L,Spike_E156G,NSP3_P1469S,Spike_T478K,NSP6_T77A,NS3_E239Q,NSP12_P323L,Spike_D614G,NSP4_V167L,Spike_L452R,NSP4_T295I)
hCoV-19/USA/WI-MHDL-2022010093/2021	EPI_ISL_8594406	2021-12-01	North America / USA / Wisconsin / Milwaukee County	Human	Original	Nanopore Clear Dx	BIP-WV6	AY.103	21J	Delta	GK	(N_P365T,N_G215C,N_D63G,N_R203M,NSP12_G671S,NSP13_I334V,NS3_S26L,Spike_P681R,Spike_R158del,NSP3_P1228L,NS7a_V82A,NSP3_A488S,Spike_F157del,NSP4_T492I,NSP14_A394V,Spike_T19R,NS7a_T120I,N_D377Y,M_I82T,Spike_D950N,NS7b_T40I,NSP13_P77L,Spike_E156G,NSP3_P1469S,Spike_T478K,NSP6_T77A,NSP12_P323L,Spike_D614G,Spike_L452R,NSP4_V167L,NSP6_V149F)
hCoV-19/USA/WI-MHDL-2022010094/2021	EPI_ISL_8594407	2021-12-01	North America / USA / Wisconsin / Milwaukee County	Human	Original	Nanopore Clear Dx	BIP-WV6	AY.113	21J	Delta	GK	(N_G215C,N_D63G,N_R203M,NSP12_G671S,NSP12_P264S,NS8_V33F,NS3_S26L,NSP15_D91G,NSP14_L303M,Spike_P681R,Spike_R158del,NSP3_P1228L,NSP4_T204I,NS7a_V82A,NSP3_A488S,Spike_F157del,NSP4_T492I,NSP14_A394V,Spike_T19R,NS7a_T120I,NS7a_L12F,N_D377Y,M_I82T,NSP2_E460D,Spike_D950N,NS7b_T40I,NSP13_P77L,Spike_E156G,NSP3_P1469S,Spike_T478K,NSP6_T77A,NSP15_N82S,NSP12_P323L,NSP5_K90R,Spike_D614G,NSP4_V167L,Spike_L452…
hCoV-19/USA/WI-MHDL-2022010096/2021	EPI_ISL_8594408	2021-12-01	North America / USA / Wisconsin / Milwaukee County	Human	Original	Nanopore Clear Dx	BIP-WV6	AY.103	21J	Delta	GK	(N_G215C,N_D63G,N_R203M,NSP12_G671S,NSP13_I334V,NSP12_A185V,NS3_S26L,Spike_P681R,Spike_R158del,NSP3_P1228L,NS7a_V82A,NSP3_A488S,Spike_F157del,NSP4_T492I,NSP14_A394V,NS7a_T120I,N_D377Y,M_I82T,NSP2_A127V,Spike_D950N,NSP15_D91Y,NS7b_T40I,NSP13_P77L,Spike_E156G,NSP3_R407I,NSP3_P1469S,Spike_T478K,NSP6_T77A,NSP12_P323L,Spike_D614G,NSP4_V167L,Spike_L452R)
hCoV-19/USA/WI-MHDL-2022010097/2021	EPI_ISL_8594409	2021-12-01	North America / USA / Wisconsin / Milwaukee County	Human	Original	Nanopore Clear Dx	BIP-WV6	AY.103	21J	Delta	GK	(N_G215C,N_D63G,N_R203M,NSP12_G671S,NSP13_I334V,NS3_S26L,Spike_P681R,Spike_R158del,NSP3_P1228L,NS7a_V82A,NSP3_A488S,Spike_F157del,NSP4_T492I,NSP14_A394V,Spike_T19R,NS7a_T120I,N_D377Y,M_I82T,Spike_D950N,NS7b_T40I,NSP13_P77L,Spike_E156G,NSP3_P1469S,Spike_T478K,Spike_A623V,NSP6_T77A,NSP12_P323L,Spike_D614G,Spike_L452R,NSP4_V167L)
hCoV-19/USA/WI-MHDL-2022010098/2021	EPI_ISL_8594410	2021-12-01	North America / USA / Wisconsin / Milwaukee County	Human	Original	Nanopore Clear Dx	BIP-WV6	AY.44	21J	Delta	GK	(N_G215C,N_D63G,N_R203M,NSP12_G671S,NS3_S26L,NSP2_T429I,NSP4_A457V,Spike_P681R,Spike_R158del,NSP15_A171S,NSP3_P1228L,NS7a_V82A,NSP3_A488S,NSP15_K12N,Spike_F157del,NSP4_T492I,NSP5_P108L,NSP14_A394V,Spike_T19R,NS7a_T120I,NSP12_F192V,N_D377Y,M_I82T,Spike_D950N,NSP12_R249G,NS7b_T40I,NSP13_P77L,Spike_E156G,NSP3_P1469S,Spike_T478K,NSP6_T77A,NSP12_P323L,Spike_D614G,NSP4_V167L,Spike_L452R)
hCoV-19/USA/WI-MHDL-2022010099/2021	EPI_ISL_8594411	2021-12-01	North America / USA / Wisconsin / Milwaukee County	Human	Original	Nanopore Clear Dx	BIP-WV6	AY.3	21J	Delta	GK	(N_G215C,N_D63G,N_R203M,NSP12_G671S,NSP6_I162V,NS3_S26L,Spike_P681R,NSP3_N1383Y,Spike_R158del,NSP3_P1228L,NS7a_V82A,NSP3_A488S,Spike_F157del,NSP4_T492I,NSP14_A394V,Spike_T19R,NS7a_T120I,N_D377Y,M_I82T,Spike_D950N,NS7b_T40I,NSP13_P77L,Spike_E156G,NSP3_P1469S,Spike_T478K,NSP6_T77A,NSP14_A187S,NSP12_P323L,Spike_D614G,NSP4_V167L,NSP5_I259L,Spike_L452R)
hCoV-19/USA/WI-MHDL-2021120149/2021	EPI_ISL_7809502	2021-12-02	North America / USA / Wisconsin / Milwaukee County	Human	Original	Illumina MiSeq	DRAGEN COVID lineage v3.5.4	AY.3	21J	Delta	GK	(N_G215C,N_D63G,N_R203M,NSP12_G671S,NSP6_I162V,NS3_S26L,NSP8_R51H,Spike_P681R,Spike_R158del,NSP3_P1228L,NS7a_V82A,NSP3_A488S,Spike_F157del,NSP4_T492I,NSP14_A394V,Spike_T19R,NS7a_T120I,N_D377Y,M_I82T,Spike_D950N,NS7b_T40I,NSP13_P77L,Spike_E156G,NSP3_P1469S,NSP5_T93I,Spike_T478K,NSP6_T77A,NSP12_P323L,Spike_D614G,NSP4_V167L,NSP5_I259L,Spike_L452R,NSP15_L216S)
hCoV-19/USA/WI-MHDL-2021120151/2021	EPI_ISL_7809504	2021-12-02	North America / USA / Wisconsin / Milwaukee County	Human	Original	Illumina MiSeq	DRAGEN COVID lineage v3.5.4	AY.100	21J	Delta	GK	(N_G215C,Spike_T95I,N_D63G,N_R203M,NSP12_G671S,NS3_S26L,NSP13_A296S,Spike_P681R,Spike_R158del,NSP3_P1228L,NS7a_V82A,NSP3_A488S,Spike_F157del,NSP4_T492I,NSP14_A394V,Spike_T19R,Spike_P499S,NS7a_T120I,N_D377Y,M_I82T,Spike_D950N,NS7a_A64D,Spike_M1237I,NS7b_T40I,NSP13_P77L,Spike_E156G,NSP3_P1469S,NS8_Y31F,Spike_T478K,NSP6_T77A,NSP12_P323L,Spike_S704L,Spike_D614G,NSP4_V167L,Spike_L452R)
hCoV-19/USA/WI-MHDL-2021120153/2021	EPI_ISL_7809506	2021-12-02	North America / USA / Wisconsin / Milwaukee County	Human	Original	Illumina MiSeq	DRAGEN COVID lineage v3.5.4	AY.25	21J	Delta	GK	(N_G215C,N_D63G,N_R203M,NSP12_G671S,Spike_G142D,NS3_S26L,NS8_R115L,Spike_P681R,Spike_R158del,NSP3_P1228L,NS7a_V82A,NSP3_A488S,Spike_F157del,NSP4_T492I,NSP14_A394V,Spike_T19R,NS7a_T120I,N_D377Y,M_I82T,Spike_D950N,Spike_S112L,NS7b_T40I,NSP13_P77L,Spike_E156G,M_T30I,NSP3_P1469S,Spike_T478K,NSP6_T77A,NS3_E239Q,NSP12_P323L,Spike_D614G,NSP4_V167L,Spike_L452R)
hCoV-19/USA/WI-MHDL-2021120300/2021	EPI_ISL_7828363	2021-12-02	North America / USA / Wisconsin / Milwaukee County	Human	Original	Illumina MiSeq	DRAGEN COVID lineage v3.5.5	AY.100	21J	Delta	GK	(N_G215C,N_D63G,N_R203M,NSP12_G671S,NSP2_T223I,NS3_S26L,NSP13_A296S,Spike_P681R,NSP3_P1228L,NSP3_A488S,NSP4_T492I,NSP14_A394V,Spike_T19R,N_D377Y,NSP12_P323F,M_I82T,Spike_D950N,NS7b_T40I,NSP13_P77L,NSP3_P1469S,Spike_T478K,NSP6_T77A,Spike_D614G,NSP4_V167L,Spike_L452R,NSP4_T295I)
hCoV-19/USA/WI-MHDL-2021120301/2021	EPI_ISL_7828364	2021-12-02	North America / USA / Wisconsin / Milwaukee County	Human	Original	Illumina MiSeq	DRAGEN COVID lineage v3.5.5	AY.100	21J	Delta	GK	(N_G215C,N_D63G,N_R203M,NSP12_G671S,NSP2_T223I,NS3_S26L,NSP13_A296S,Spike_P681R,NSP3_P1228L,NSP3_A488S,NSP4_T492I,NSP14_A394V,Spike_T19R,N_D377Y,NSP12_P323F,M_I82T,Spike_D950N,NS7b_T40I,NSP13_P77L,NSP3_P1469S,Spike_T478K,NSP6_T77A,Spike_D614G,NSP4_V167L,Spike_L452R,NSP4_T295I)
hCoV-19/USA/WI-MHDL-2022010148/2021	EPI_ISL_8565345	2021-12-02	North America / USA / Wisconsin / Milwaukee County	Human	Original	Illumina MiSeq	DRAGEN COVID lineage v3.5.5	AY.3	21J	Delta	GK	(N_G215C,N_D63G,N_R203M,NSP12_G671S,NSP6_I162V,NS6_P57S,Spike_G142D,NSP12_A581T,NS3_S26L,Spike_P681R,Spike_R158del,NSP3_P1228L,NS7a_V82A,NSP3_A488S,Spike_F157del,NSP4_T492I,NSP14_A394V,Spike_T19R,NS7a_T120I,NSP3_K1715R,N_D377Y,M_I82T,Spike_D950N,NS7b_T40I,NSP13_P77L,Spike_E156G,Spike_N148D,NSP3_P1469S,Spike_T478K,NSP6_T77A,NSP12_P323L,N_Q9H,NSP5_K90R,Spike_D614G,NSP4_V167L,Spike_L452R)
hCoV-19/USA/WI-MHDL-2022010149/2021	EPI_ISL_8565346	2021-12-02	North America / USA / Wisconsin / Milwaukee County	Human	Original	Illumina MiSeq	DRAGEN COVID lineage v3.5.5	AY.103	21J	Delta	GK	(N_G215C,N_D63G,N_R203M,NSP12_G671S,NSP13_I334V,Spike_G142D,NSP14_T372I,NS3_S26L,NSP8_P178H,Spike_P681R,Spike_R158del,NSP3_P1228L,NS7a_V82A,NSP3_A488S,Spike_F157del,NSP4_T492I,NSP14_A394V,Spike_T19R,NS7a_T120I,N_D377Y,M_I82T,Spike_D950N,NS7b_T40I,NSP13_P77L,Spike_E156G,NSP3_P1469S,NSP3_K462N,Spike_T478K,NSP6_T77A,NSP12_P323L,Spike_D614G,NSP4_V167L,Spike_L452R,NSP3_L1126S)
hCoV-19/USA/WI-MHDL-2022010150/2021	EPI_ISL_8565347	2021-12-02	North America / USA / Wisconsin / Milwaukee County	Human	Original	Illumina MiSeq	DRAGEN COVID lineage v3.5.5	AY.103	21J	Delta	GK	(N_P365T,N_G215C,N_D63G,N_R203M,NSP12_G671S,NSP13_I334V,Spike_G142D,NS3_S26L,Spike_P681R,Spike_R158del,NS7a_V82A,NSP3_A488S,Spike_F157del,NSP4_T492I,NSP14_A394V,Spike_T19R,NS7a_T120I,N_D377Y,M_I82T,Spike_D950N,NS7b_T40I,NSP13_P77L,Spike_E156G,NSP3_P1469S,Spike_T478K,NSP6_T77A,NSP12_P323L,Spike_D614G,Spike_L452R,NSP4_V167L,NSP6_V149F)
hCoV-19/USA/WI-MHDL-2022010151/2021	EPI_ISL_8565348	2021-12-02	North America / USA / Wisconsin / Milwaukee County	Human	Original	Illumina MiSeq	DRAGEN COVID lineage v3.5.5	AY.103	21J	Delta	GK	(N_G215C,N_D63G,NSP2_C177S,N_R203M,NSP3_P1662S,NSP12_G671S,NSP13_I334V,Spike_G142D,NS3_S26L,Spike_P681R,Spike_R158del,Spike_S939F,NSP3_P1228L,NS7a_V82A,NSP3_A488S,Spike_F157del,NSP4_T492I,NSP14_A394V,Spike_T19R,NS7a_T120I,N_D377Y,M_I82T,Spike_D950N,Spike_S221L,NS7b_T40I,N_T362I,NSP13_P77L,Spike_E156G,NSP2_V186I,NSP3_P1469S,Spike_T478K,NSP3_N354S,NS7a_P45L,NSP6_T77A,NSP12_P323L,Spike_D614G,NSP4_V1…
hCoV-19/USA/WI-MHDL-2022010152/2021	EPI_ISL_8565349	2021-12-02	North America / USA / Wisconsin / Milwaukee County	Human	Original	Illumina MiSeq	DRAGEN COVID lineage v3.5.5	AY.3	21J	Delta	GK	(N_G215C,N_D63G,N_R203M,NSP12_G671S,NSP6_I162V,NS6_P57S,Spike_G142D,NSP12_A581T,NS3_S26L,Spike_P681R,Spike_R158del,NSP3_P1228L,NS7a_V82A,NSP3_A488S,Spike_F157del,NSP4_T492I,NSP14_A394V,Spike_T19R,NS7a_T120I,N_P168S,N_D377Y,M_I82T,Spike_D950N,NS7b_T40I,NSP13_P77L,Spike_E156G,NSP3_P1469S,Spike_T478K,NSP6_T77A,NSP14_V405L,NSP12_P323L,N_Q9H,NSP5_K90R,Spike_D614G,NSP4_V167L,Spike_L452R,NSP3_P200S)
hCoV-19/USA/WI-MHDL-2022010153/2021	EPI_ISL_8565350	2021-12-02	North America / USA / Wisconsin / Milwaukee County	Human	Original	Illumina MiSeq	DRAGEN COVID lineage v3.5.5	AY.118	21J	Delta	GK	(N_G215C,Spike_V1264L,Spike_T95I,N_D63G,N_R203M,NS3_S171A,NSP12_G671S,NSP16_T48I,NSP2_G339S,Spike_G142D,NS3_S26L,Spike_P681R,Spike_R158del,NSP3_P1228L,NS7a_V82A,NSP3_A488S,Spike_F157del,NS6_E46V,NSP4_T492I,NSP14_A394V,Spike_T19R,NS7a_T120I,N_D377Y,M_I82T,Spike_D950N,NS7b_T40I,NSP13_P77L,Spike_E156G,NSP3_P1469S,NSP2_T531A,Spike_T478K,NSP6_T77A,NSP12_P323L,Spike_D614G,NSP4_V167L,Spike_L452R)
hCoV-19/USA/WI-MHDL-2022010154/2021	EPI_ISL_8565351	2021-12-02	North America / USA / Wisconsin / Milwaukee County	Human	Original	Illumina MiSeq	DRAGEN COVID lineage v3.5.5	AY.103	21J	Delta	GK	(N_G215C,N_D63G,N_R203M,NSP12_G671S,NSP13_I334V,Spike_G142D,NS3_S26L,Spike_P681R,Spike_R158del,NS8_C25Y,NSP3_P1228L,NS7a_V82A,NSP3_A488S,Spike_F157del,NSP4_T492I,NSP14_A394V,Spike_T19R,NS7a_T120I,NSP12_P227L,N_D377Y,M_I82T,Spike_D950N,NS7b_T40I,NSP13_P77L,NSP4_A472V,Spike_E156G,NSP8_K37N,NSP3_P1469S,Spike_T478K,NSP6_L260F,NSP6_T77A,NSP12_P323L,Spike_D614G,NSP4_V167L,Spike_L452R)
hCoV-19/USA/WI-MHDL-2022010155/2021	EPI_ISL_8565352	2021-12-02	North America / USA / Wisconsin / Milwaukee County	Human	Original	Illumina MiSeq	DRAGEN COVID lineage v3.5.5	AY.44	21J	Delta	GK	(N_G215C,N_D63G,N_R203M,NSP12_G671S,Spike_G142D,NS3_S26L,NSP3_I397V,Spike_P681R,Spike_R158del,NSP3_L689F,NSP3_P1228L,NS7a_V82A,NSP3_A488S,Spike_F157del,NSP4_T492I,NSP14_A394V,Spike_T19R,NS7a_T120I,NSP12_F192V,N_D377Y,M_I82T,Spike_D950N,NSP6_K263N,NS7b_T40I,NSP3_A1736V,NSP13_P77L,Spike_E156G,NSP3_P1469S,Spike_T478K,NSP3_G171V,NSP6_T77A,NSP12_P323L,Spike_D614G,NSP4_V167L,Spike_L452R,NSP3_R1297S)
hCoV-19/USA/WI-MHDL-2021120156/2021	EPI_ISL_7364686	2021-12-02	North America / USA / Wisconsin / Milwaukee County	Human	Original	Nanopore Clear Dx	BIP-WV6	AY.100	21J	Delta	GK	(N_G215C,N_D63G,N_R203M,NSP12_G671S,NS3_L41F,NSP2_T223I,NS3_S26L,NSP13_A296S,Spike_P681R,Spike_R158del,NSP3_P1228L,NSP3_L1791F,NS7a_V82A,NSP3_A488S,Spike_F157del,NSP4_T492I,NSP14_A394V,Spike_T19R,NS7a_T120I,Spike_L18F,N_D377Y,M_I82T,Spike_D950N,NS7b_T40I,NSP13_P77L,Spike_E156G,NSP3_P1469S,Spike_T478K,NSP6_T77A,NSP12_P323L,Spike_D614G,NSP4_V167L,Spike_L452R,NSP4_T295I)
hCoV-19/USA/WI-MHDL-2021120157/2021	EPI_ISL_7364687	2021-12-02	North America / USA / Wisconsin / Milwaukee County	Human	Original	Nanopore Clear Dx	BIP-WV6	AY.103	21J	Delta	GK	(N_G215C,NSP2_T160I,N_D63G,N_R203M,NSP12_G671S,NSP13_I334V,NS3_S26L,Spike_P681R,Spike_R158del,NSP3_P1228L,NS7a_V82A,NSP3_A488S,Spike_F157del,NSP4_T492I,NSP14_A394V,Spike_T19R,NS7a_T120I,N_D377Y,M_I82T,Spike_D950N,NS7b_T40I,NSP13_P77L,Spike_E156G,NSP3_P1469S,Spike_T478K,NSP6_T77A,NSP12_P323L,Spike_D614G,Spike_P272S,NSP4_V167L,Spike_L452R)
hCoV-19/USA/WI-MHDL-2021120158/2021	EPI_ISL_7364688	2021-12-02	North America / USA / Wisconsin / Milwaukee County	Human	Original	Nanopore Clear Dx	BIP-WV6	AY.3	21J	Delta	GK	(N_G215C,N_D63G,N_R203M,NSP12_G671S,NSP6_I162V,NS3_S26L,Spike_P681R,Spike_R158del,NSP3_P1228L,NSP1_D75G,NS7a_V82A,NSP3_A488S,Spike_F157del,NSP4_T492I,NSP14_A394V,Spike_T19R,NS7a_T120I,N_D377Y,M_I82T,Spike_D950N,NS7b_T40I,NSP13_P77L,Spike_E156G,NSP4_Q364H,NSP3_P1469S,Spike_T478K,NSP6_T77A,NSP12_P323L,Spike_D614G,NSP12_K91E,NSP4_V167L,Spike_L452R)
hCoV-19/USA/WI-MHDL-2021120160/2021	EPI_ISL_7364689	2021-12-02	North America / USA / Wisconsin / Milwaukee County	Human	Original	Nanopore Clear Dx	BIP-WV6	AY.25.1	21J	Delta	GK	(N_G215C,N_D63G,N_R203M,NSP12_G671S,NS3_S26L,Spike_P681R,Spike_R158del,NSP3_P1228L,NS7a_V82A,NSP3_A488S,Spike_F157del,NSP4_T492I,NSP14_A394V,Spike_T19R,NS7a_T120I,N_D377Y,M_I82T,NSP6_C197F,Spike_D950N,NS7b_T40I,NSP13_P77L,NS3_P42L,Spike_E156G,NSP16_P37S,NS7a_P99S,Spike_T547I,NSP3_P1469S,NSP13_A463S,Spike_T478K,NSP6_T77A,NSP4_A298T,NS3_E239Q,NSP12_P323L,Spike_D614G,NSP4_V167L,Spike_L452R,NSP3_D410…
hCoV-19/USA/WI-MHDL-2021120161/2021	EPI_ISL_7364690	2021-12-02	North America / USA / Wisconsin / Milwaukee County	Human	Original	Nanopore Clear Dx	BIP-WV6	AY.25	21J	Delta	GK	(N_G215C,NSP1_N160S,N_D63G,N_R203M,NSP12_G671S,NS3_S26L,Spike_P681R,Spike_R158del,NSP3_P1228L,NS7a_V82A,NSP3_A488S,Spike_F157del,Spike_D178H,NSP4_T492I,NSP4_V261I,NSP14_A394V,Spike_T19R,NS7a_T120I,N_D377Y,M_I82T,Spike_D950N,NS7b_T40I,NSP13_P77L,Spike_A1070S,Spike_E156G,NSP3_P1469S,Spike_T478K,NSP6_T77A,NS3_E239Q,NSP9_R39K,NSP12_P323L,Spike_D614G,NSP4_V167L,Spike_L452R)
hCoV-19/USA/WI-MHDL-2021120162/2021	EPI_ISL_7364691	2021-12-02	North America / USA / Wisconsin / Milwaukee County	Human	Original	Nanopore Clear Dx	BIP-WV6	AY.26	21I	Delta	GK	(Spike_V1264L,N_D63G,N_R203M,NSP12_G671S,NS6_K48N,NSP3_Q180H,NSP2_A419V,NSP6_T181I,NSP3_P1103S,NS3_S26L,Spike_P681R,Spike_R158del,NS7a_V82A,Spike_F157del,N_P279Q,N_D144H,Spike_T19R,NS7a_T120I,Spike_A222V,N_D377Y,M_I82T,NSP6_V149A,Spike_D950N,NSP3_P822L,NSP13_P77L,Spike_E156G,NSP4_A446V,NSP16_P215L,Spike_T478K,NSP3_I388T,NSP12_P323L,NSP16_R216N,Spike_D614G,Spike_L452R,NSP16_K160R)
hCoV-19/USA/WI-MHDL-2021120163/2021	EPI_ISL_7364692	2021-12-02	North America / USA / Wisconsin / Milwaukee County	Human	Original	Nanopore Clear Dx	BIP-WV6	AY.25	21J	Delta	GK	(N_G215C,NSP2_T580I,N_D63G,N_R203M,NSP12_G671S,NS3_S26L,Spike_P681R,Spike_R158del,NSP3_P1228L,Spike_D936H,NS7a_V82A,NSP3_A488S,Spike_F157del,NSP4_T492I,Spike_Q14H,NSP14_A394V,Spike_T19R,NS7a_T120I,N_D377Y,M_I82T,Spike_D950N,NS7b_T40I,NSP13_P77L,Spike_E156G,NSP3_P1469S,Spike_T478K,NSP6_T77A,NS3_E239Q,NSP12_P323L,Spike_D614G,NSP4_V167L,Spike_L452R)
hCoV-19/USA/WI-MHDL-2021120168/2021	EPI_ISL_7364698	2021-12-02	North America / USA / Wisconsin / Milwaukee County	Human	Original	Nanopore Clear Dx	BIP-WV6	AY.44	21J	Delta	GK	(N_G215C,NS8_L60F,N_R203M,NSP12_G671S,NS3_S26L,Spike_P681R,Spike_R158del,NSP3_P1228L,NSP14_V125I,NS7a_V82A,NSP3_A488S,Spike_F157del,NSP4_T492I,NSP14_A394V,Spike_T19R,NS7a_T120I,NSP12_F192V,N_D377Y,NSP13_H164Y,M_I82T,Spike_D950N,NS7b_T40I,NSP3_A1736V,NSP13_P77L,Spike_E156G,NSP3_H1307Y,NSP3_P1469S,Spike_T478K,NSP6_T77A,N_D63S,NSP12_P323L,Spike_D614G,NSP4_V167L,NSP6_L37F,Spike_L452R)
hCoV-19/USA/WI-MHDL-2021120167/2021	EPI_ISL_7364702	2021-12-02	North America / USA / Wisconsin / Milwaukee County	Human	Original	Nanopore Clear Dx	BIP-WV6	BA.1.15	21K	Omicron	GRA	(NSP5_P132H,Spike_H69del,Spike_T95I,Spike_A67V,NSP6_S106del,Spike_N969K,Spike_H655Y,Spike_N856K,N_R203K,Spike_G142D,NSP3_A1892T,Spike_Q954H,Spike_G339D,NS3_L106F,N_P13L,NSP3_L1266I,N_R32del,NSP3_S1265del,NSP9_T109I,NSP14_I42V,Spike_P681H,Spike_Y144del,M_Q19E,N_S33del,NSP4_T492I,NSP6_L105del,Spike_N679K,Spike_N764K,NSP6_G107del,N_E31del,NSP3_K38R,NSP6_I189V,Spike_T547K,Spike_D796Y,N_G204R,N_D343G,…
hCoV-19/USA/WI-MHDL-2021120159/2021	EPI_ISL_7365849	2021-12-02	North America / USA / Wisconsin / Washington County	Human	Original	Nanopore Clear Dx	BIP-WV6	AY.44	21J	Delta	GK	(N_G215C,N_D63G,N_R203M,NSP12_G671S,Spike_A27S,NS3_S26L,Spike_P681R,Spike_R158del,NSP3_P1228L,NS7a_V82A,NSP3_A488S,Spike_F157del,NSP4_T492I,NSP14_A394V,Spike_T19R,NS7a_T120I,NSP12_F192V,N_D377Y,M_I82T,Spike_D950N,Spike_T547A,NS7b_T40I,NSP13_P77L,Spike_E156G,NSP3_P1469S,NSP12_Q822H,Spike_T478K,NSP6_T77A,NSP5_A260V,NSP12_P323L,NS8_Q72H,Spike_D614G,NSP4_V167L,Spike_L452R)
hCoV-19/USA/WI-MHDL-2021120214/2021	EPI_ISL_7660947	2021-12-02	North America / USA / Wisconsin / Milwaukee County	Human	Original	Nanopore Clear Dx	BIP-WV6	AY.103	21J	Delta	GK	(N_G215C,N_D63G,NSP2_C177S,N_R203M,NSP12_G671S,NSP13_I334V,NS3_S26L,Spike_P681R,Spike_R158del,NSP3_P1228L,NS7a_V82A,NSP3_A488S,Spike_F157del,NSP4_T492I,NSP14_A394V,Spike_T19R,NS7a_T120I,N_D377Y,M_I82T,Spike_D950N,NS7b_T40I,NSP13_P77L,Spike_E156G,NSP3_P1469S,Spike_T478K,NSP14_S357I,NSP3_N354S,NSP6_T77A,NSP12_P323L,Spike_D614G,NSP4_V167L,Spike_L452R,NSP4_G178S)
hCoV-19/USA/WI-MHDL-2021120217/2021	EPI_ISL_7660948	2021-12-02	North America / USA / Wisconsin / Milwaukee County	Human	Original	Nanopore Clear Dx	BIP-WV6	AY.103	21J	Delta	GK	(N_G215C,N_D63G,N_R203M,NSP12_G671S,NSP13_I334V,NS3_S26L,Spike_P681R,Spike_R158del,NSP3_P1228L,NS7a_V82A,NSP3_A488S,Spike_F157del,NSP2_D402N,NSP4_T492I,NSP14_A394V,Spike_T19R,NS7a_T120I,N_D377Y,M_I82T,NSP15_P205S,Spike_D950N,NS7b_T40I,NSP13_P77L,Spike_E156G,NSP3_P1469S,Spike_T478K,NSP6_T77A,NSP12_P323L,NSP5_K90R,Spike_D614G,NSP4_V167L,Spike_E340V)
hCoV-19/USA/WI-MHDL-2021120216/2021	EPI_ISL_7660956	2021-12-02	North America / USA / Wisconsin / Milwaukee County	Human	Original	Nanopore Clear Dx	BIP-WV6	AY.3	21J	Delta	GK	(N_G215C,N_D63G,N_R203M,Spike_I1221V,NSP12_G671S,NSP6_I162V,NS7a_V82del,NSP13_T481M,NS3_S26L,NS7a_S83T,Spike_P681R,Spike_R158del,NSP3_P1228L,N_S327L,NSP3_A488S,Spike_F157del,NSP4_T492I,NSP14_A394V,Spike_T19R,NS7a_T120I,N_D377Y,M_I82T,Spike_D950N,NS7b_T40I,NSP13_P77L,Spike_E156G,NS7a_S81del,NSP3_T656I,NSP3_P1469S,NSP3_L1837F,Spike_T478K,NSP6_T77A,NSP12_P323L,Spike_D614G,NSP4_V167L,Spike_L452R,NS7a…
hCoV-19/USA/WI-MHDL-2021120213/2021	EPI_ISL_7660957	2021-12-02	North America / USA / Wisconsin / Milwaukee County	Human	Original	Nanopore Clear Dx	BIP-WV6	AY.3	21J	Delta	GK	(N_D63G,Spike_I1221V,NSP12_G671S,NSP6_I162V,NS7a_V82del,NSP3_P1103S,NS3_S26L,NS7a_S83T,Spike_P681R,Spike_R158del,NSP3_P1228L,NSP3_A488S,Spike_F157del,NSP4_T492I,NSP14_A394V,Spike_T19R,NS7a_T120I,N_D377Y,M_I82T,Spike_D950N,NS7b_T40I,NSP13_P77L,Spike_E156G,NS7a_S81del,NSP3_T656I,NSP3_L1837F,NSP3_P1469S,NSP6_T77A,NSP12_P323L,Spike_D614G,NSP4_V167L,NS7a_R80del)
hCoV-19/USA/WI-MHDL-2021120212/2021	EPI_ISL_7660964	2021-12-02	North America / USA / Wisconsin / Milwaukee County	Human	Original	Nanopore Clear Dx	BIP-WV6	AY.103	21J	Delta	GK	(N_G215C,N_D63G,N_R203M,NS3_H78Y,NSP12_G671S,NSP13_I334V,NS3_S26L,NSP8_P178H,Spike_P681R,Spike_R158del,NSP3_P1228L,NSP12_N909S,NS7a_V82A,NSP3_A488S,Spike_F157del,NSP4_T492I,NSP4_L353F,NSP14_A394V,Spike_T19R,NS7a_T120I,N_D377Y,M_I82T,Spike_D950N,NS7b_T40I,NSP13_P77L,Spike_E156G,NSP3_P1469S,Spike_T478K,NSP6_T77A,NSP4_T114I,NSP12_P323L,Spike_D614G,NSP4_V167L,Spike_L452R)
hCoV-19/USA/WI-MHDL-2021120228/2021	EPI_ISL_7660967	2021-12-02	North America / USA / Wisconsin / Milwaukee County	Human	Original	Nanopore Clear Dx	BIP-WV6	BA.1.17	21K	Omicron	GRA	(NSP5_P132H,Spike_H69del,Spike_T95I,Spike_A67V,NSP6_S106del,Spike_N969K,Spike_H655Y,Spike_N856K,N_R203K,Spike_G142D,NSP3_A1892T,Spike_Q954H,Spike_G339D,N_P13L,NSP3_L1266I,N_R32del,NSP3_S1265del,NSP14_I42V,Spike_P681H,Spike_Y144del,M_Q19E,N_S33del,NSP4_T492I,NSP6_L105del,Spike_N679K,Spike_N764K,NSP6_G107del,N_E31del,NSP3_K38R,NSP6_I189V,Spike_T547K,M_D3G,Spike_D796Y,N_G204R,E_T9I,Spike_V70del,Spik…
hCoV-19/USA/WI-MHDL-2021120211/2021	EPI_ISL_7660969	2021-12-02	North America / USA / Wisconsin / Milwaukee County	Human	Original	Nanopore Clear Dx	BIP-WV6	BA.1.15	21K	Omicron	GRA	(NSP5_P132H,Spike_H69del,Spike_T95I,Spike_A67V,NSP6_S106del,Spike_N969K,Spike_H655Y,Spike_N856K,N_R203K,Spike_G142D,NSP3_A1892T,Spike_Q954H,Spike_G339D,NS3_L106F,N_P13L,NSP3_L1266I,N_R32del,NSP3_S1265del,NSP14_I42V,Spike_P681H,Spike_Y144del,M_Q19E,N_S33del,NSP4_T492I,NSP6_L105del,Spike_N679K,Spike_N764K,NSP6_G107del,N_E31del,NSP3_K38R,NSP6_I189V,Spike_T547K,Spike_D796Y,N_G204R,N_D343G,Spike_V70de…
hCoV-19/USA/WI-MHDL-2021120349/2021	EPI_ISL_7698324	2021-12-02	North America / USA / Wisconsin / Milwaukee County	Human	Original	Nanopore Clear Dx	BIP-WV6	AY.103	21J	Delta	GK	(N_G215C,N_D63G,N_R203M,NSP12_G671S,NSP13_I334V,NS3_V77F,NS3_S26L,Spike_P681R,Spike_R158del,NS8_V62L,NSP3_P1228L,NS7a_V82A,NSP3_A488S,Spike_F157del,NSP4_T492I,NSP14_A394V,Spike_T19R,NS7a_T120I,N_D377Y,NSP3_S794L,M_I82T,Spike_D950N,NSP2_V279F,NS7b_T40I,NSP13_P77L,Spike_E156G,NSP3_P1469S,Spike_T478K,NSP6_T77A,NSP12_P323L,Spike_D614G,NSP4_V167L,Spike_L452R)
hCoV-19/USA/WI-MHDL-2021120359/2021	EPI_ISL_7744412	2021-12-02	North America / USA / Wisconsin / Waukesha County	Human	Original	Nanopore Clear Dx	BIP-WV6	AY.44	21J	Delta	GK	(N_G215C,N_D63G,N_R203M,NSP12_G671S,NS3_S26L,Spike_P681R,Spike_R158del,NSP3_P1228L,NS7a_V82A,NSP3_A488S,Spike_F157del,Spike_D253G,NSP4_T492I,NSP14_A394V,Spike_T19R,NS7a_T120I,NSP2_E545A,NSP12_F192V,N_D377Y,M_I82T,NSP15_P118S,Spike_D950N,NS8_W45C,NS7b_T40I,NSP3_A1736V,NSP13_P77L,Spike_E156G,NSP3_P1469S,NSP12_G823C,NSP14_A220V,NSP6_T77A,NSP12_T26I,NSP12_P323L,Spike_D614G,NSP4_V167L)
hCoV-19/USA/WI-MHDL-2021120389/2021	EPI_ISL_7877064	2021-12-02	North America / USA / Wisconsin / Milwaukee County	Human	Original	Nanopore Clear Dx	BIP-WV6	AY.103	21J	Delta	GK	(N_G215C,N_D63G,N_R203M,NSP12_G671S,NSP13_I334V,NS3_S26L,Spike_P681R,NS8_W45L,Spike_R158del,NSP3_P1228L,NSP3_M951V,NS7a_V82A,NSP3_A488S,Spike_F157del,Spike_G261S,NSP4_T492I,NSP14_A394V,Spike_T19R,NS7a_T120I,NS8_C83F,N_D377Y,M_I82T,Spike_D950N,NS7b_T40I,NSP13_P77L,Spike_E156G,NSP3_P1469S,Spike_T478K,NSP6_T77A,NSP14_S137I,NSP12_P323L,Spike_D614G,NSP4_V167L,Spike_L452R)
hCoV-19/USA/WI-MHDL-2021120442/2021	EPI_ISL_7935028	2021-12-02	North America / USA / Wisconsin / Milwaukee County	Human	Original	Nanopore Clear Dx	BIP-WV6	AY.44	21J	Delta	GK	(N_G215C,N_D63G,N_R203M,NSP12_G671S,NSP1_V5G,NS3_S26L,Spike_P681R,Spike_R158del,NSP3_P1228L,NSP15_T83I,NS7a_V82A,NSP3_A488S,Spike_F157del,NSP4_T492I,NSP14_A394V,Spike_T19R,NS7a_T120I,NSP12_F192V,N_D377Y,M_I82T,Spike_D950N,NSP3_A1502V,NS7b_T40I,Spike_Q321L,NSP13_P77L,Spike_E156G,NSP3_P1469S,Spike_T478K,NSP6_T77A,NSP12_P323L,Spike_D614G,NSP4_V167L,Spike_L452R,NSP3_T1072I)
hCoV-19/USA/WI-MHDL-2021120443/2021	EPI_ISL_7935029	2021-12-02	North America / USA / Wisconsin / Milwaukee County	Human	Original	Nanopore Clear Dx	BIP-WV6	AY.44	21J	Delta	GK	(N_G215C,NS8_L60F,NSP6_A56V,N_R203M,NSP12_G671S,NSP16_K249N,NS3_S26L,Spike_P681R,Spike_R158del,NSP3_P1228L,NSP14_V125I,NS7a_V82A,NSP3_A488S,Spike_F157del,NSP4_T492I,NSP14_A394V,Spike_T19R,NS7a_T120I,NSP12_F192V,N_D377Y,NSP13_H164Y,M_I82T,Spike_D950N,NS7b_T40I,NSP3_A1736V,NSP13_P77L,Spike_E156G,NSP3_H1307Y,NSP3_P1469S,Spike_T478K,NSP6_T77A,N_D63S,NSP12_P323L,Spike_D614G,NSP4_V167L,Spike_L452R)
hCoV-19/USA/WI-MHDL-2021120428/2021	EPI_ISL_7935032	2021-12-02	North America / USA / Wisconsin / Milwaukee County	Human	Original	Nanopore Clear Dx	BIP-WV6	AY.44	21J	Delta	GK	(N_G215C,NS8_L60F,N_D63G,N_R203M,NSP12_G671S,NS3_S26L,NS7b_I2T,Spike_P681R,Spike_R158del,NSP3_P1228L,NS7a_V82A,NSP3_A488S,Spike_F157del,NSP4_T492I,NSP14_A394V,Spike_T19R,NS7a_T120I,NS7a_Q62stop,NSP12_F192V,N_D377Y,NSP13_H164Y,M_I82T,Spike_D950N,NS7b_T40I,NSP3_V393I,NSP3_A1736V,NSP13_P77L,Spike_E156G,NSP3_H1307Y,NSP5_A7T,NSP6_T77A,NSP12_P323L,Spike_D614G,NSP4_V167L)
hCoV-19/USA/WI-MHDL-2021120427/2021	EPI_ISL_7935033	2021-12-02	North America / USA / Wisconsin / Milwaukee County	Human	Original	Nanopore Clear Dx	BIP-WV6	AY.25.1	21J	Delta	GK	(N_G215C,N_D63G,N_R203M,NSP12_G671S,NS3_S26L,Spike_P681R,NSP3_P1228L,N_T271I,NS7a_V82A,NSP3_A488S,NSP4_T492I,NSP14_A394V,Spike_T19R,Spike_G1124V,NS7a_T120I,N_D377Y,M_I82T,NSP6_C197F,Spike_D950N,NS7b_T40I,NSP13_P77L,NSP3_P1469S,NSP6_T77A,NS3_E239Q,NSP2_D268del,NSP12_P323L,Spike_D614G,NSP4_V167L,NSP3_D410G)
hCoV-19/USA/WI-MHDL-2021120441/2021	EPI_ISL_7935034	2021-12-02	North America / USA / Wisconsin / Milwaukee County	Human	Original	Nanopore Clear Dx	BIP-WV6	AY.103	21J	Delta	GK	(N_G215C,N_D63G,N_R203M,NSP12_G671S,NSP13_I334V,NSP3_V477F,NS3_S26L,NSP1_V28A,Spike_P681R,Spike_R158del,NSP3_P1228L,NS8_P38S,NS7a_V82A,NSP3_A488S,Spike_F157del,NSP4_T492I,NSP14_A394V,Spike_T19R,NS7a_T120I,N_D377Y,M_I82T,Spike_D950N,NS7b_T40I,NSP13_P77L,Spike_E156G,NSP3_P1469S,Spike_T478K,NSP6_T77A,NSP12_P323L,Spike_D614G,NSP4_V167L,Spike_L452R)
hCoV-19/USA/WI-MHDL-2021120422/2021	EPI_ISL_7935037	2021-12-02	North America / USA / Wisconsin / Milwaukee County	Human	Original	Nanopore Clear Dx	BIP-WV6	AY.25	21J	Delta	GK	(N_G215C,N_D63G,N_R203M,NSP12_G671S,NS3_S26L,NS3_D155Y,Spike_P681R,Spike_R158del,NSP3_P1228L,NS7a_V82A,NSP3_A488S,Spike_F157del,NSP4_T492I,NSP14_A394V,Spike_T19R,NS7a_T120I,N_D377Y,M_I82T,Spike_D950N,NS7b_T40I,NSP13_P77L,Spike_E156G,NSP3_P1469S,Spike_T478K,NSP6_T77A,NS3_E239Q,NSP9_R39K,NSP12_P323L,Spike_D614G,NSP4_V167L,Spike_L452R,N_R40C)
hCoV-19/USA/WI-MHDL-2021120425/2021	EPI_ISL_7935038	2021-12-02	North America / USA / Wisconsin / Milwaukee County	Human	Original	Nanopore Clear Dx	BIP-WV6	AY.119	21J	Delta	GK	(N_G215C,Spike_P809S,N_D63G,N_R203M,NSP12_G671S,NS3_S26L,Spike_P681R,Spike_R158del,NSP3_P1228L,NS3_T9K,NSP9_T24I,NS7a_V82A,NSP3_A488S,Spike_F157del,NSP4_T492I,NSP14_A394V,Spike_T19R,NS7a_T120I,N_D377Y,M_I82T,Spike_D950N,NS7b_T40I,NSP13_P77L,NSP14_A323S,Spike_E156G,NSP3_P1469S,NSP4_A92V,Spike_T478K,NSP6_T77A,NSP15_V22L,NSP12_P323L,Spike_D614G,NSP4_V167L,Spike_L452R)
hCoV-19/USA/WI-MHDL-2021120429/2021	EPI_ISL_7935039	2021-12-02	North America / USA / Wisconsin / Milwaukee County	Human	Original	Nanopore Clear Dx	BIP-WV6	AY.103	21J	Delta	GK	(N_G215C,N_D63G,N_A208S,N_R203M,NSP12_G671S,NSP13_I334V,N_G30R,NS3_P104S,NS3_S26L,Spike_P681R,Spike_R158del,NSP3_P1228L,NS7a_V82A,NSP3_A488S,Spike_F157del,NSP4_T492I,Spike_Q677H,NSP14_A394V,Spike_T19R,NS7a_T120I,N_D377Y,M_I82T,Spike_D950N,NS7b_T40I,NSP13_P77L,Spike_E156G,NSP3_P1469S,Spike_T478K,NSP6_T77A,NSP12_P323L,Spike_D614G,NSP2_P552S,NSP4_V167L,Spike_L452R)
hCoV-19/USA/WI-MHDL-2021120431/2021	EPI_ISL_7935040	2021-12-02	North America / USA / Wisconsin / Milwaukee County	Human	Original	Nanopore Clear Dx	BIP-WV6	AY.103	21J	Delta	GK	(N_G215C,N_D63G,N_A208S,N_R203M,NSP12_G671S,NSP13_I334V,N_G30R,NS3_P104S,NS3_S26L,Spike_P681R,Spike_R158del,NSP3_P1228L,NS7a_V82A,NSP3_A488S,Spike_F157del,NSP4_T492I,Spike_Q677H,NSP14_A394V,Spike_T19R,NS7a_T120I,N_D377Y,M_I82T,Spike_D950N,NS7b_T40I,NSP13_P77L,Spike_E156G,NSP3_P1469S,Spike_T478K,NSP6_T77A,NSP12_P323L,Spike_D614G,NSP2_P552S,NSP4_V167L,Spike_L452R)
hCoV-19/USA/WI-MHDL-2021120435/2021	EPI_ISL_7935041	2021-12-02	North America / USA / Wisconsin / Milwaukee County	Human	Original	Nanopore Clear Dx	BIP-WV6	AY.44	21J	Delta	GK	(N_T135I,N_G215C,NS8_L60F,N_D63G,N_R203M,NSP12_G671S,NSP2_P624L,NS3_S26L,NSP10_N105S,Spike_P681R,Spike_R158del,NSP3_P1228L,NS7a_V82A,NSP3_A488S,Spike_F157del,NSP4_T492I,NSP14_A394V,Spike_T19R,NS7a_T120I,NSP12_F192V,N_D377Y,NSP13_H164Y,M_I82T,Spike_D950N,NS7b_T40I,NSP3_A1736V,NSP13_P77L,Spike_E156G,NSP3_H1307Y,NSP5_N277S,NSP3_P1469S,Spike_T478K,NSP12_E522D,NSP12_I201V,NSP6_T77A,NSP3_V418F,NSP12_P3…
hCoV-19/USA/WI-MHDL-2021120440/2021	EPI_ISL_7935042	2021-12-02	North America / USA / Wisconsin / Milwaukee County	Human	Original	Nanopore Clear Dx	BIP-WV6	AY.113	21J	Delta	GK	(N_G215C,N_D63G,N_R203M,NSP12_G671S,NSP12_P264S,NS8_V33F,NS3_S26L,NSP15_D91G,Spike_P681R,Spike_R158del,NSP3_P1228L,NSP4_T204I,NS7a_V82A,NSP3_A488S,Spike_F157del,NSP4_T492I,NSP14_A394V,Spike_T19R,NS7a_T120I,N_D377Y,M_I82T,Spike_D950N,NS7b_T40I,NSP13_P77L,Spike_E156G,NSP3_P1469S,Spike_T478K,NSP15_N82S,NSP6_T77A,NSP12_P323L,NSP5_K90R,Spike_D614G,NSP4_V167L,Spike_L452R)
hCoV-19/USA/WI-MHDL-2021120433/2021	EPI_ISL_7935044	2021-12-02	North America / USA / Wisconsin / Milwaukee County	Human	Original	Nanopore Clear Dx	BIP-WV6	AY.103	21J	Delta	GK	(N_G215C,N_D63G,N_R203M,NSP12_G671S,NSP13_I334V,NS3_V77F,NS3_S26L,NSP2_K239N,Spike_P681R,Spike_R158del,NS8_P36L,NSP3_P1228L,NS7a_V82A,NSP3_A488S,Spike_F157del,NSP4_T492I,NSP14_A394V,Spike_T19R,NS7a_T120I,N_D377Y,NSP3_S794L,M_I82T,Spike_D950N,NS7b_T40I,NSP13_P77L,Spike_E156G,NSP3_P1469S,Spike_T478K,NSP6_T77A,NSP12_P323L,Spike_D614G,NSP4_V167L,Spike_L452R)
hCoV-19/USA/WI-MHDL-2021120434/2021	EPI_ISL_7935045	2021-12-02	North America / USA / Wisconsin / Milwaukee County	Human	Original	Nanopore Clear Dx	BIP-WV6	AY.103	21J	Delta	GK	(N_G215C,N_D63G,N_R203M,NSP12_G671S,NSP13_I334V,NS3_V77F,NS3_S26L,NSP2_K239N,Spike_P681R,Spike_R158del,NS8_P36L,NSP3_P1228L,NS7a_V82A,NSP3_A488S,Spike_F157del,NSP4_T492I,NSP14_A394V,Spike_T19R,NS7a_T120I,N_D377Y,NSP3_S794L,M_I82T,Spike_D950N,NS7b_T40I,NSP13_P77L,Spike_E156G,NSP3_P1469S,Spike_T478K,NSP6_T77A,NSP12_P323L,Spike_D614G,NSP4_V167L,Spike_L452R)
hCoV-19/USA/WI-MHDL-2021120436/2021	EPI_ISL_7935046	2021-12-02	North America / USA / Wisconsin / Milwaukee County	Human	Original	Nanopore Clear Dx	BIP-WV6	AY.3.1	21J	Delta	GK	(N_G215C,N_D63G,N_R203M,NSP14_H26Y,NSP12_G671S,NSP6_I162V,NSP15_E21V,NS3_S26L,Spike_P681R,Spike_R158del,NSP3_P1228L,NS7a_V82A,NSP3_A488S,Spike_F157del,NSP4_T492I,NSP14_A394V,Spike_T19R,NS7a_T120I,N_D377Y,M_I82T,Spike_D950N,NS7b_T40I,NSP13_P77L,Spike_E156G,NSP3_P1469S,Spike_T478K,NSP6_T77A,NSP5_A193S,NSP3_D309Y,NSP1_P80L,NSP12_P323L,Spike_D614G,NSP4_V167L,Spike_L452R)
hCoV-19/USA/WI-MHDL-2021120426/2021	EPI_ISL_7935048	2021-12-02	North America / USA / Wisconsin / Milwaukee County	Human	Original	Nanopore Clear Dx	BIP-WV6	AY.103	21J	Delta	GK	(N_G215C,N_D63G,N_R203M,NSP12_G671S,NSP13_I334V,NS3_V77F,NS3_S26L,NSP2_K239N,Spike_P681R,Spike_R158del,NS8_P36L,NSP3_P1228L,NS7a_V82A,NSP3_A488S,Spike_F157del,NSP4_T492I,NSP14_A394V,Spike_T19R,NS7a_T120I,N_D377Y,NSP3_S794L,M_I82T,Spike_D950N,NS7b_T40I,NSP13_P77L,Spike_E156G,NSP3_P1469S,NSP6_T77A,NSP12_P323L,Spike_D614G,NSP4_V167L)
hCoV-19/USA/WI-MHDL-2021120421/2021	EPI_ISL_7935049	2021-12-02	North America / USA / Wisconsin / Milwaukee County	Human	Original	Nanopore Clear Dx	BIP-WV6	AY.119	21J	Delta	GK	(N_G215C,Spike_P809S,N_D63G,N_R203M,NSP12_G671S,NSP13_T481M,NS3_S26L,Spike_P681R,Spike_R158del,NSP3_P1228L,NSP9_T24I,NS7a_V82A,NSP3_A488S,Spike_F157del,NSP4_T492I,NSP14_A394V,Spike_T19R,NS7a_T120I,N_D377Y,M_I82T,Spike_D950N,NS7a_P45del,NS7b_T40I,NSP13_P77L,NSP14_A323S,Spike_E156G,NSP3_P1469S,NSP4_A92V,NSP6_T77A,NSP12_P323L,Spike_D614G,NSP4_V167L)
hCoV-19/USA/WI-MHDL-2021120438/2021	EPI_ISL_7935050	2021-12-02	North America / USA / Wisconsin / Milwaukee County	Human	Original	Nanopore Clear Dx	BIP-WV6	AY.103	21J	Delta	GK	(N_G215C,N_D63G,N_R203M,NSP12_G671S,NSP13_I334V,NS3_V77F,NS3_S26L,Spike_P681R,Spike_R158del,NS8_V62L,NSP3_P1228L,NS7a_V82A,NSP3_A488S,Spike_F157del,NSP4_T492I,NSP14_A394V,Spike_T19R,NS7a_T120I,N_D377Y,NSP3_S794L,M_I82T,Spike_D950N,NSP2_V279F,NS7b_T40I,NSP13_P77L,Spike_E156G,NSP3_P1469S,Spike_T478K,NSP6_T77A,NSP12_P323L,Spike_D614G,NSP4_V167L,Spike_L452R)
hCoV-19/USA/WI-MHDL-2021120432/2021	EPI_ISL_7938715	2021-12-02	North America / USA / Wisconsin / Milwaukee County	Human	Original	Nanopore Clear Dx	BIP-WV6	AY.103	21J	Delta	GK	(N_G215C,N_D63G,N_R203M,NSP12_G671S,NSP13_I334V,NS3_S26L,Spike_K182I,NSP8_P178H,Spike_P681R,Spike_R158del,NSP3_P1228L,NS8_E106stop,NS7a_V82A,NSP3_A488S,Spike_F157del,NSP4_T492I,NSP14_A394V,Spike_T19R,NS7a_T120I,N_D377Y,M_I82T,Spike_D950N,NS7b_T40I,NSP13_P77L,Spike_E156G,NSP8_P10S,NSP3_P1469S,Spike_T478K,NSP6_T77A,NSP12_P323L,Spike_D614G,NSP4_V167L,Spike_L452R)
hCoV-19/USA/WI-MHDL-2021120460/2021	EPI_ISL_7979281	2021-12-02	North America / USA / Wisconsin / Milwaukee County	Human	Original	Nanopore Clear Dx	BIP-WV6	AY.100	21J	Delta	GK	(N_G215C,N_D63G,N_R203M,NSP12_G671S,NS3_S26L,NSP13_A296S,Spike_P681R,Spike_R158del,NSP3_P1228L,NS7a_V82A,NSP3_A488S,Spike_F157del,NSP4_T492I,NSP14_A394V,Spike_T19R,NS7a_T120I,NSP3_A256T,N_D377Y,M_I82T,Spike_D950N,NS7b_T40I,NSP13_P77L,Spike_E156G,NSP3_P1469S,NS8_Y31F,Spike_T478K,NSP6_T77A,NSP12_P323L,Spike_D614G,Spike_L452R,NSP4_V167L)
hCoV-19/USA/WI-MHDL-2021120461/2021	EPI_ISL_7979282	2021-12-02	North America / USA / Wisconsin / Milwaukee County	Human	Original	Nanopore Clear Dx	BIP-WV6	AY.103	21J	Delta	GK	(N_P365T,N_G215C,N_D63G,N_R203M,NSP12_G671S,NSP13_I334V,NS3_S26L,Spike_P681R,Spike_R158del,NSP3_P1228L,NS7a_V82A,NSP3_A488S,Spike_F157del,NSP4_T492I,NSP14_A394V,Spike_T19R,NS7a_T120I,N_D377Y,M_I82T,Spike_D950N,NS7b_T40I,NSP13_P77L,Spike_E156G,NSP3_P1469S,Spike_T478K,NSP6_T77A,NSP12_P323L,Spike_D614G,Spike_L452R,NSP4_V167L,NSP6_V149F)
hCoV-19/USA/WI-MHDL-2021120462/2021	EPI_ISL_7979283	2021-12-02	North America / USA / Wisconsin / Milwaukee County	Human	Original	Nanopore Clear Dx	BIP-WV6	AY.25.1	21J	Delta	GK	(N_G215C,N_D63G,N_R203M,NSP12_G671S,NS3_S26L,Spike_P681R,Spike_R158del,NSP3_P1228L,NS7a_V82A,NSP3_A488S,Spike_F157del,NSP4_T492I,NSP14_A394V,Spike_T19R,NS7a_T120I,N_P122S,N_D377Y,M_I82T,NSP6_C197F,Spike_D950N,NS7b_T40I,NSP13_P77L,Spike_E156G,NSP9_C23S,NSP3_P1469S,Spike_T478K,NSP6_T77A,NS3_E239Q,NSP12_P323L,Spike_D614G,NSP4_V167L,Spike_L452R,NSP3_D410G)
hCoV-19/USA/WI-MHDL-2021120463/2021	EPI_ISL_7979284	2021-12-02	North America / USA / Wisconsin / Milwaukee County	Human	Original	Nanopore Clear Dx	BIP-WV6	AY.103	21J	Delta	GK	(N_D63G,N_R203M,NSP12_G671S,M_M109V,NSP13_I334V,NSP8_A16S,N_G214del,NS3_S26L,Spike_P681R,Spike_R158del,NSP3_P1228L,NS7a_V82A,NSP3_A488S,Spike_F157del,NSP4_T492I,NSP14_A394V,Spike_T19R,NS7a_T120I,N_D377Y,M_I82T,Spike_D950N,NS7b_T40I,NSP13_P77L,N_G215del,Spike_E156G,NSP3_P1469S,Spike_T478K,NSP6_T77A,NSP12_P323L,Spike_D614G,NSP4_V167L,Spike_L452R,NSP2_Q134K)
hCoV-19/USA/WI-MHDL-2021120464/2021	EPI_ISL_7979285	2021-12-02	North America / USA / Wisconsin / Milwaukee County	Human	Original	Nanopore Clear Dx	BIP-WV6	AY.103	21J	Delta	GK	(N_G215C,N_D63G,N_R203M,NSP12_G671S,NSP13_I334V,NS3_S26L,Spike_P681R,Spike_R158del,NSP3_P1228L,NS7a_V82A,NSP3_A488S,Spike_F157del,NSP4_T492I,NSP8_L184F,NSP14_A394V,Spike_T19R,NS7a_T120I,N_D377Y,M_I82T,Spike_D950N,NS7b_T40I,NSP13_P77L,Spike_E156G,NSP3_P1469S,Spike_T478K,NSP6_T77A,NSP12_P323L,Spike_D614G,NSP4_V167L,Spike_L452R,NSP6_V149F)
hCoV-19/USA/WI-MHDL-2021120465/2021	EPI_ISL_7979286	2021-12-02	North America / USA / Wisconsin / Milwaukee County	Human	Original	Nanopore Clear Dx	BIP-WV6	AY.39	21J	Delta	GK	(N_G215C,N_D63G,N_R203M,NSP12_G671S,NSP16_Q238H,NS3_S26L,Spike_P681R,Spike_R158del,NSP3_P1228L,NS7a_V82A,NSP3_A488S,Spike_F157del,NSP4_T492I,NSP14_A394V,Spike_T19R,NS7a_T120I,N_D377Y,M_I82T,Spike_D950N,Spike_C1250F,NS7b_T40I,NSP13_P77L,NSP3_N1313S,Spike_E156G,NSP3_P1469S,NSP3_T217I,Spike_T478K,NS3_T175I,NS7a_V71I,NSP6_T77A,NSP12_P323L,NSP3_K280N,Spike_D614G,NSP4_V167L,Spike_L452R)
hCoV-19/USA/WI-MHDL-2021120466/2021	EPI_ISL_7979287	2021-12-02	North America / USA / Wisconsin / Milwaukee County	Human	Original	Nanopore Clear Dx	BIP-WV6	AY.103	21J	Delta	GK	(N_G215C,N_D63G,N_R203M,NSP12_G671S,NSP13_I334V,NSP4_S336L,NS3_S26L,Spike_P681R,Spike_R158del,NSP3_P1228L,NS7a_V82A,NSP3_A488S,Spike_F157del,NSP4_T492I,NSP14_A394V,Spike_T19R,NS7a_T120I,N_D377Y,M_I82T,Spike_D950N,NS7b_T40I,NSP13_P77L,Spike_E156G,NS8_R115S,NSP3_P1469S,Spike_T478K,NS7a_P45L,NSP6_T77A,NSP2_W450C,NSP12_P323L,Spike_D614G,NSP4_V167L,Spike_L452R,NSP16_K160R)
hCoV-19/USA/WI-MHDL-2021120468/2021	EPI_ISL_7979288	2021-12-02	North America / USA / Wisconsin / Milwaukee County	Human	Original	Nanopore Clear Dx	BIP-WV6	B.1.617.2	21J	Delta	GK	(N_G215C,NS3_A99S,N_D63G,N_R203M,NSP12_G671S,NSP6_A117V,NS3_S26L,Spike_P681R,Spike_R158del,NSP3_L744F,NSP3_P1228L,NSP12_Y831H,NSP3_A488S,Spike_F157del,NSP4_T492I,NSP14_A394V,Spike_T19R,NS7a_T120I,NSP2_A375V,NSP2_L550F,NSP12_L270F,N_D377Y,M_I82T,Spike_D950N,NS7b_T40I,NSP13_P77L,Spike_E156G,NSP3_P1469S,Spike_T478K,NSP6_T77A,NSP12_P323L,Spike_D614G,NSP4_V167L,Spike_L452R)
hCoV-19/USA/WI-MHDL-2022010042/2021	EPI_ISL_8428597	2021-12-02	North America / USA / Wisconsin / Milwaukee County	Human	Original	Nanopore Clear Dx	BIP-WV6	AY.103	21J	Delta	GK	(N_G215C,N_D63G,N_R203M,NSP12_G671S,NSP13_I334V,NS3_S26L,Spike_P681R,Spike_R158del,NSP3_P1228L,N_A35V,NS7a_V82A,NSP3_A488S,Spike_F157del,NSP4_T492I,NSP14_A394V,Spike_T19R,NS7a_T120I,N_D377Y,NSP3_A1766V,M_I82T,Spike_D950N,NS7b_T40I,NSP13_P77L,Spike_E156G,NSP3_P1469S,NSP12_A382T,Spike_T323I,Spike_T478K,NS8_A14S,NSP6_T77A,NSP12_P323L,NSP16_R216N,Spike_D614G,NSP4_V167L,Spike_L452R,Spike_S255F)
hCoV-19/USA/WI-MHDL-2022010045/2021	EPI_ISL_8428600	2021-12-02	North America / USA / Wisconsin / Milwaukee County	Human	Original	Nanopore Clear Dx	BIP-WV6	AY.39	21J	Delta	GK	(N_G215C,N_D63G,N_R203M,NSP12_G671S,NSP16_Q238H,NS3_S74F,NS3_S26L,Spike_P681R,Spike_R158del,NSP3_P1228L,NS3_F43L,NS7a_V82A,NSP3_A488S,Spike_F157del,NSP4_T492I,NSP14_A394V,Spike_T19R,NS7a_T120I,N_D377Y,M_I82T,Spike_D950N,NS7b_T40I,NSP13_P77L,NS3_P42L,Spike_E156G,NSP3_P1469S,Spike_T478K,NS7a_V71I,NSP6_T77A,NSP4_T225I,NSP12_P323L,Spike_D614G,NSP4_V167L,Spike_L452R)
hCoV-19/USA/WI-MHDL-2022010048/2021	EPI_ISL_8428603	2021-12-02	North America / USA / Wisconsin / Milwaukee County	Human	Original	Nanopore Clear Dx	BIP-WV6	AY.118	21J	Delta	GK	(N_G215C,Spike_V1264L,N_D63G,N_R203M,NS3_S171A,NSP12_G671S,NSP2_G339S,NS3_S26L,NS3_P258del,Spike_P681R,Spike_R158del,NSP3_P1228L,NS7a_V82A,NSP3_A488S,Spike_F157del,NS6_E46V,NSP4_T492I,NSP14_A394V,Spike_T19R,NS7a_T120I,N_D377Y,NS3_V256del,M_I82T,Spike_D950N,NS7b_T40I,NSP13_P77L,Spike_E156G,NSP3_P1469S,NSP2_T531A,Spike_T478K,NSP6_T77A,NSP12_P323L,Spike_D614G,NS3_N257del,NSP4_V167L,Spike_L452R)
hCoV-19/USA/WI-MHDL-2022010100/2021	EPI_ISL_8594412	2021-12-02	North America / USA / Wisconsin / Milwaukee County	Human	Original	Nanopore Clear Dx	BIP-WV6	AY.3	21J	Delta	GK	(N_G215C,N_D63G,NSP12_G671S,NS3_D210A,NSP6_I162V,NS3_S26L,Spike_P681R,Spike_R158del,NSP3_P1228L,NS7a_V82A,NSP3_A488S,Spike_F157del,NSP4_T492I,NSP14_A394V,Spike_T19R,NS7a_T120I,N_D377Y,M_I82T,Spike_D950N,NS7b_T40I,NSP13_P77L,Spike_E156G,NSP3_P1469S,Spike_T478K,NSP6_T77A,N_G34W,NSP12_P323L,Spike_D614G,NSP4_V167L,NSP6_L37F,Spike_L452R,N_R203T,NSP3_S1843F)
hCoV-19/USA/WI-MHDL-2022010101/2021	EPI_ISL_8594413	2021-12-02	North America / USA / Wisconsin / Milwaukee County	Human	Original	Nanopore Clear Dx	BIP-WV6	AY.39	21J	Delta	GK	(N_G215C,N_D63G,N_R203M,NSP12_G671S,NSP16_Q238H,NSP3_H342Y,NS3_S26L,NSP4_T189I,Spike_P681R,Spike_R158del,N_R32del,NSP3_P1228L,NS3_L95S,NS7a_V82A,NSP3_A488S,Spike_F157del,N_S33del,NSP4_T492I,NSP14_A394V,Spike_T19R,NS7a_T120I,NSP2_A375V,N_D377Y,M_I82T,Spike_D950N,NS7b_T40I,NSP13_P77L,N_E31del,Spike_E156G,NSP3_P1469S,Spike_T478K,NS7a_V71I,NSP6_T77A,NSP12_P323L,Spike_D614G,NSP4_V167L,Spike_L452R)
hCoV-19/USA/WI-MHDL-2021120169/2021	EPI_ISL_7364700	2021-12-03	North America / USA / Wisconsin / Milwaukee County	Human	Original	Nanopore Clear Dx	BIP-WV6	BA.1.17	21K	Omicron	GRA	(NSP5_P132H,Spike_H69del,Spike_T95I,Spike_A67V,NSP6_S106del,Spike_N969K,Spike_H655Y,Spike_N856K,N_R203K,Spike_G142D,Spike_Q954H,Spike_G339D,N_P13L,NSP3_L1266I,N_R32del,NSP3_S1265del,NSP14_I42V,Spike_P681H,Spike_Y144del,M_Q19E,N_S33del,NSP4_T492I,NSP6_L105del,Spike_N679K,NSP6_G107del,N_E31del,Spike_T547K,N_G204R,Spike_V70del,Spike_L981F,Spike_V143del,M_A63T,NSP12_P323L,Spike_Y145del,Spike_D614G,NS…
hCoV-19/USA/WI-MHDL-2021120195/2021	EPI_ISL_7478636	2021-12-03	North America / USA / Wisconsin / Milwaukee County	Human	Original	Nanopore Clear Dx	BIP-WV6	AY.26	21I	Delta	GK	(Spike_V1264L,N_D63G,N_R203M,NSP12_G671S,NS6_K48N,NSP3_Q180H,NSP2_A419V,NSP6_T181I,NSP3_P1103S,NS3_S26L,Spike_P681R,Spike_R158del,NS7a_V82A,Spike_F157del,N_P279Q,N_D144H,Spike_T19R,NS7a_T120I,Spike_A222V,N_D377Y,M_I82T,NSP6_V149A,Spike_D950N,NSP3_P822L,NSP13_P77L,Spike_E156G,NSP4_A446V,NSP16_P215L,Spike_T478K,NSP3_I388T,NSP12_P323L,NSP16_R216N,Spike_D614G,Spike_L452R,NSP16_K160R)
hCoV-19/USA/WI-MHDL-2021120196/2021	EPI_ISL_7478637	2021-12-03	North America / USA / Wisconsin / Milwaukee County	Human	Original	Nanopore Clear Dx	BIP-WV6	AY.103	21J	Delta	GK	(N_G215C,N_D63G,N_R203M,NSP8_T145I,NSP12_G671S,NSP13_I334V,NS3_S26L,Spike_P681R,Spike_R158del,NSP3_P1228L,NS7a_V82A,NS8_R115C,NSP3_A488S,Spike_F157del,NSP4_T492I,NSP14_A394V,Spike_T19R,NS7a_T120I,Spike_Q613H,N_P168S,N_D377Y,M_I82T,Spike_D950N,NS7b_T40I,NSP13_P77L,Spike_E156G,NSP3_P1469S,Spike_T478K,NSP6_T77A,NSP12_P323L,Spike_D614G,NSP4_V167L,Spike_L452R)
hCoV-19/USA/WI-MHDL-2021120197/2021	EPI_ISL_7478638	2021-12-03	North America / USA / Wisconsin / Milwaukee County	Human	Original	Nanopore Clear Dx	BIP-WV6	AY.3	21J	Delta	GK	(N_G215C,NS3_I123L,N_D63G,N_R203M,NSP12_G671S,NSP6_I162V,Spike_V512I,NS3_S26L,Spike_P681R,Spike_R158del,NSP3_P1228L,N_N345S,NS7a_V82A,NSP3_A488S,Spike_F157del,NSP4_T492I,NSP14_A394V,Spike_T19R,NS7a_T120I,N_D377Y,M_I82T,Spike_D950N,NS7b_T40I,NSP13_P77L,Spike_E156G,NSP3_H1307Y,NSP3_P1469S,Spike_T478K,NSP3_S1578I,NSP6_T77A,NSP12_P323L,Spike_D614G,NSP4_V167L,Spike_L452R)
hCoV-19/USA/WI-MHDL-2022010030/2021	EPI_ISL_8388843	2021-12-03	North America / USA / Wisconsin / Milwaukee County	Human	Original	Nanopore Clear Dx	BIP-WV6	AY.119	21J	Delta	GK	(N_G215C,Spike_P809S,N_D63G,N_R203M,NSP15_R257L,NSP12_G671S,NS3_S26L,E_V62F,Spike_P681R,NS8_W45L,Spike_R158del,NSP3_P1228L,NSP9_T24I,NS7a_V82A,NSP3_A488S,Spike_F157del,NSP4_T492I,NSP12_N743H,NSP14_A394V,Spike_T19R,NS7a_T120I,N_D377Y,M_I82T,Spike_D950N,NS7a_S37F,NS7b_T40I,NSP13_P77L,NSP14_A323S,NSP6_Y116C,Spike_E156G,NSP3_P1469S,NSP4_A92V,Spike_T478K,NSP12_P323L,Spike_D614G,NSP4_V167L,Spike_L452R)
hCoV-19/USA/WI-MHDL-2022010028/2021	EPI_ISL_8388848	2021-12-03	North America / USA / Wisconsin / Milwaukee County	Human	Original	Nanopore Clear Dx	BIP-WV6	B.1.617.2	21J	Delta	GK	(N_G215C,NS3_A99S,N_D63G,N_R203M,NSP12_G671S,NSP6_A117V,NS3_S26L,Spike_P681R,Spike_R158del,NSP3_L744F,NSP3_P1228L,NSP12_Y831H,NSP3_A488S,Spike_F157del,NSP4_T492I,NSP14_A394V,Spike_T19R,NS7a_T120I,NSP2_A375V,NSP2_L550F,NSP12_L270F,N_D377Y,M_I82T,Spike_D950N,NS7b_T40I,NSP13_P77L,Spike_E156G,NSP3_P1469S,Spike_T478K,NSP6_T77A,NSP12_P323L,Spike_D614G,NSP4_V167L,Spike_L452R)
hCoV-19/USA/WI-MHDL-2022010043/2021	EPI_ISL_8428598	2021-12-03	North America / USA / Wisconsin / Milwaukee County	Human	Original	Nanopore Clear Dx	BIP-WV6	AY.25	21J	Delta	GK	(N_G215C,N_D63G,N_R203M,NSP12_G671S,NS3_S26L,Spike_P681R,Spike_R158del,NSP3_P1228L,NS7a_V82A,Spike_F157del,NSP3_A488S,NSP4_T492I,NSP14_A394V,Spike_T19R,NS7a_T120I,N_D377Y,M_I82T,Spike_D950N,NS7b_T40I,NSP13_P77L,Spike_E156G,NSP3_P1469S,Spike_T478K,NSP6_T77A,NS3_E239Q,NS6_T21A,NSP12_P323L,Spike_D614G,NSP4_V167L,Spike_L452R,Spike_A522V)
hCoV-19/USA/WI-MHDL-2022010044/2021	EPI_ISL_8428599	2021-12-03	North America / USA / Wisconsin / Milwaukee County	Human	Original	Nanopore Clear Dx	BIP-WV6	AY.103	21J	Delta	GK	(N_G215C,N_D63G,N_R203M,NSP12_G671S,NSP13_I334V,NSP14_T372I,NS3_S26L,NSP8_P178H,Spike_P681R,Spike_R158del,NSP3_P1228L,NS7a_V82A,NSP3_A488S,Spike_F157del,NSP4_T492I,NSP14_A394V,Spike_T19R,NS7a_T120I,N_D377Y,M_I82T,Spike_D950N,NS7b_T40I,NSP13_P77L,Spike_E156G,NSP3_P1469S,NSP3_K462N,Spike_T478K,NSP6_T77A,NSP6_F184V,NSP12_P323L,Spike_D614G,NSP4_V167L,Spike_L452R,NSP3_L1126S)
hCoV-19/USA/WI-MHDL-2022010046/2021	EPI_ISL_8428601	2021-12-03	North America / USA / Wisconsin / Milwaukee County	Human	Original	Nanopore Clear Dx	BIP-WV6	AY.119	21J	Delta	GK	(N_G215C,Spike_P809S,N_D63G,N_R203M,NSP12_G671S,NS3_S26L,Spike_P681R,Spike_R158del,NSP3_P1228L,NSP9_T24I,NS7a_V82A,NSP3_A488S,Spike_F157del,NSP4_T492I,NSP14_A394V,Spike_T19R,NS7a_T120I,N_D377Y,M_I82T,Spike_D950N,NS7b_T40I,NSP13_P77L,NSP14_A323S,Spike_E156G,M_V70F,NSP3_P1469S,NSP4_A92V,Spike_T478K,NSP6_T77A,NSP12_P323L,Spike_D614G,NSP4_V167L,Spike_L452R)
hCoV-19/USA/WI-MHDL-2022010047/2021	EPI_ISL_8428602	2021-12-03	North America / USA / Wisconsin / Milwaukee County	Human	Original	Nanopore Clear Dx	BIP-WV6	AY.25	21J	Delta	GK	(N_G215C,N_D63G,N_R203M,NSP12_G671S,NS3_S26L,Spike_P681R,Spike_R158del,NSP3_I1567V,NSP3_P1228L,NSP3_T734S,NSP14_V14L,NS7a_V82A,NSP3_A488S,Spike_F157del,NSP4_T492I,NSP14_A394V,Spike_T19R,NS7a_T120I,N_D377Y,M_I82T,Spike_D950N,NS7b_T40I,NSP13_P77L,Spike_E156G,NS3_H93Y,NSP3_P1469S,Spike_T478K,NSP6_T77A,NS3_E239Q,N_P20L,NSP12_P323L,Spike_D614G,NSP4_V167L,Spike_L452R,NSP16_T140I)
hCoV-19/USA/WI-MHDL-2022010049/2021	EPI_ISL_8428604	2021-12-03	North America / USA / Wisconsin / Milwaukee County	Human	Original	Nanopore Clear Dx	BIP-WV6	AY.25	21J	Delta	GK	(N_G215C,N_D63G,N_R203M,NSP12_G671S,NS3_S26L,Spike_P681R,Spike_R158del,NSP3_P1228L,NSP13_M233I,NS7a_V82A,NSP3_A488S,Spike_F157del,NSP4_T492I,NSP14_A394V,Spike_T19R,NS7a_T120I,N_D377Y,M_I82T,Spike_D950N,NS7b_T40I,NSP13_P77L,Spike_E156G,NSP3_P1469S,Spike_T478K,NSP6_T77A,NS3_E239Q,NSP12_P323L,Spike_D614G,NSP4_V167L,Spike_L452R,NSP3_I1239M)
hCoV-19/USA/WI-MHDL-2022010050/2021	EPI_ISL_8428605	2021-12-03	North America / USA / Wisconsin / Milwaukee County	Human	Original	Nanopore Clear Dx	BIP-WV6	B.1.617.2	21J	Delta	GK	(N_G215C,NS3_A99S,N_D63G,N_R203M,NSP12_G671S,NSP6_A117V,NS3_S26L,Spike_P681R,Spike_R158del,NSP3_L744F,NSP3_P1228L,NSP12_Y831H,NSP3_A488S,Spike_F157del,NSP4_T492I,NSP14_A394V,Spike_T19R,NS7a_T120I,NSP2_L550F,NSP2_A375V,NSP12_L270F,N_D377Y,M_I82T,Spike_D950N,NS7b_T40I,NSP13_P77L,Spike_E156G,NSP3_P1469S,Spike_T478K,NSP6_T77A,NSP12_P323L,Spike_D614G,NSP4_V167L,Spike_L452R)
hCoV-19/USA/WI-MHDL-2022010109/2021	EPI_ISL_8594421	2021-12-03	North America / USA / Wisconsin / Milwaukee County	Human	Original	Nanopore Clear Dx	BIP-WV6	AY.25	21J	Delta	GK	(N_G215C,N_D63G,NSP14_T215I,N_R203M,NSP12_G671S,NS3_S26L,Spike_P681R,Spike_R158del,NSP3_P1228L,NSP14_A100S,NS7a_V82A,NSP3_A488S,Spike_F157del,NSP4_T492I,NSP14_A394V,Spike_T19R,NS7a_T120I,N_D377Y,M_I82T,Spike_D950N,NS7b_T40I,NSP13_P77L,Spike_E156G,NSP3_P1469S,Spike_T478K,NSP6_T77A,NS3_E239Q,NSP12_P323L,Spike_D614G,NSP4_V167L,Spike_L452R)
hCoV-19/USA/WI-MHDL-2021120199/2021	EPI_ISL_7478639	2021-12-04	North America / USA / Wisconsin / Milwaukee County	Human	Original	Nanopore Clear Dx	BIP-WV6	AY.103	21J	Delta	GK	(N_G215C,N_D63G,N_R203M,NSP12_G671S,NSP13_I334V,Spike_G142D,NS3_S26L,Spike_P681R,Spike_R158del,NSP3_P1228L,NS7a_V82A,NSP3_A488S,Spike_F157del,NSP4_T492I,NSP14_A394V,Spike_T19R,NS7a_T120I,N_D377Y,M_I82T,Spike_D950N,NS7b_T40I,NSP13_P77L,Spike_E156G,NSP3_P1469S,Spike_T478K,NSP6_T77A,NSP14_S369F,NSP12_P323L,Spike_D614G,NSP4_V167L,Spike_L452R)
hCoV-19/USA/WI-MHDL-2021120485/2021	EPI_ISL_8185112	2021-12-04	North America / USA / Wisconsin / Milwaukee County	Human	Original	Nanopore Clear Dx	BIP-WV6	BA.1.20	21K	Omicron	GRA	(NSP5_P132H,Spike_H69del,Spike_T95I,Spike_A67V,NSP6_S106del,Spike_N969K,Spike_H655Y,Spike_N856K,N_P67S,N_R203K,Spike_G142D,NSP3_A1892T,Spike_Q954H,Spike_G339D,N_P13L,NSP3_L1266I,N_R32del,NSP3_S1265del,NSP14_I42V,Spike_P681H,Spike_Y144del,M_Q19E,N_S33del,NSP4_T492I,NSP6_L105del,Spike_N679K,Spike_N764K,NSP6_G107del,N_E31del,NSP6_I189V,Spike_T547K,Spike_D796Y,N_G204R,Spike_V70del,Spike_L981F,Spike_V…
hCoV-19/USA/WI-MHDL-2021120491/2021	EPI_ISL_8185118	2021-12-04	North America / USA / Wisconsin / Milwaukee County	Human	Original	Nanopore Clear Dx	BIP-WV6	AY.103	21J	Delta	GK	(Spike_I666L,N_G215C,N_D63G,NSP14_P203S,N_R203M,NSP12_G671S,NSP13_I334V,NS3_S26L,Spike_P681R,Spike_R158del,NS8_C25Y,NSP3_P1228L,NS7a_V82A,NSP3_A488S,Spike_F157del,NSP4_T492I,NSP14_A394V,Spike_T19R,NS7a_T120I,N_D377Y,M_I82T,NSP6_F269L,Spike_D950N,NS7b_T40I,NSP13_P77L,Spike_E156G,NSP3_P1469S,Spike_T478K,NSP6_T77A,NSP12_P323L,Spike_D614G,NSP4_V167L,Spike_L452R)
hCoV-19/USA/WI-MHDL-2021120511/2021	EPI_ISL_8207634	2021-12-04	North America / USA / Wisconsin / Milwaukee County	Human	Original	Nanopore Clear Dx	BIP-WV6	AY.25	21J	Delta	GK	(N_G215C,N_D63G,N_R203M,NSP12_G671S,NS3_S26L,NS8_R115L,Spike_P681R,Spike_R158del,NSP3_P1228L,NS7a_V82A,NSP3_A488S,Spike_F157del,NSP4_T492I,NSP14_A394V,Spike_T19R,NS7a_T120I,N_D377Y,M_I82T,Spike_D950N,NS7b_T40I,NSP13_P77L,Spike_E156G,M_T30I,NSP3_P1469S,NSP6_T77A,NS3_E239Q,NSP12_P323L,Spike_D614G,NSP4_V167L)
hCoV-19/USA/WI-MHDL-2021120512/2021	EPI_ISL_8207635	2021-12-04	North America / USA / Wisconsin / Milwaukee County	Human	Original	Nanopore Clear Dx	BIP-WV6	AY.103	21J	Delta	GK	(N_G215C,N_D63G,N_R203M,NSP12_G671S,NSP13_I334V,NS3_S26L,NSP3_T423I,Spike_P681R,Spike_R158del,NSP3_P1228L,NS7a_V82A,NSP3_A488S,Spike_F157del,NS8_P36S,NSP4_T492I,NSP14_A394V,Spike_T19R,NS7a_T120I,N_D377Y,M_I82T,Spike_D950N,NS7b_T40I,NSP13_P77L,NS3_P42L,Spike_E156G,NSP3_P1469S,Spike_T478K,NSP6_T77A,NSP12_P323L,Spike_D614G,NSP4_V167L,Spike_L452R)
hCoV-19/USA/WI-MHDL-2022010029/2021	EPI_ISL_8391943	2021-12-04	North America / USA / Wisconsin / Milwaukee County	Human	Original	Nanopore Clear Dx	BIP-WV6	AY.44	21J	Delta	GK	(N_G215C,NSP1_V108I,NS8_L60F,N_D63G,N_R203M,NSP12_G671S,M_M109V,NS3_S26L,Spike_P681R,Spike_R158del,NSP3_P1228L,N_P326S,NS7a_V82A,NSP3_A488S,Spike_F157del,NSP4_T492I,NSP4_L353F,NSP14_A394V,Spike_T19R,NS7a_T120I,NSP12_F192V,N_D377Y,NSP2_A476V,NSP13_H164Y,M_I82T,Spike_D950N,NS7b_T40I,NSP3_A1736V,NSP13_P77L,Spike_E156G,NSP3_H1307Y,NSP3_P1469S,NS7a_I110L,Spike_T478K,NSP6_T77A,NSP12_P323L,Spike_D614G,N…
hCoV-19/USA/WI-MHDL-2021120208/2021	EPI_ISL_7661060	2021-12-05	North America / USA / Wisconsin / Milwaukee County	Human	Original	Nanopore Clear Dx	BIP-WV6	AY.103	21J	Delta	GK	(N_G215C,N_D63G,N_R203M,NSP12_G671S,NSP13_I334V,NS3_S26L,Spike_K182I,NSP8_P178H,Spike_P681R,Spike_R158del,NSP3_P1228L,NS7a_V82A,NSP3_A488S,Spike_F157del,NSP4_T492I,NSP14_A394V,Spike_T19R,NS7a_T120I,N_D377Y,M_I82T,Spike_D950N,NS7b_T40I,NSP13_P77L,Spike_E156G,NSP3_P1469S,Spike_T478K,NSP6_T77A,NSP12_P323L,NSP5_K90R,Spike_D614G,NSP4_V167L,Spike_L452R)
hCoV-19/USA/WI-MHDL-2021120303/2021	EPI_ISL_7828366	2021-12-06	North America / USA / Wisconsin / Milwaukee County	Human	Original	Illumina MiSeq	DRAGEN COVID lineage v3.5.5	BA.1.17	21K	Omicron	GRA	(NSP5_P132H,Spike_H69del,Spike_T95I,Spike_A67V,NSP6_S106del,Spike_N969K,Spike_H655Y,Spike_N856K,N_R203K,Spike_G142D,NSP3_A1892T,Spike_Q954H,Spike_G339D,N_P13L,NSP3_L1266I,N_R32del,NSP3_S1265del,NSP14_I42V,Spike_P681H,Spike_Y144del,M_Q19E,N_S33del,NSP4_T492I,NSP6_L105del,Spike_N679K,Spike_N764K,NSP6_G107del,N_E31del,NSP3_K38R,NSP6_I189V,Spike_T547K,Spike_D796Y,N_G204R,E_T9I,Spike_V70del,Spike_L981…
hCoV-19/USA/WI-MHDL-2021120304/2021	EPI_ISL_7829646	2021-12-06	North America / USA / Wisconsin / Milwaukee County	Human	Original	Illumina MiSeq	DRAGEN COVID lineage v3.5.5	AY.3.1	21J	Delta	GK	(N_G215C,N_D63G,N_R203M,NSP14_H26Y,NSP12_G671S,NSP3_V469M,NSP6_I162V,Spike_G142D,NS3_S26L,Spike_P681R,Spike_R158del,NSP3_P1228L,NS7a_V82A,NSP3_A488S,Spike_F157del,NSP4_T492I,NSP14_A394V,Spike_T19R,NS7a_T120I,N_D377Y,M_I82T,Spike_D950N,NS7b_T40I,NSP13_P77L,Spike_E156G,NSP3_P1469S,Spike_T478K,NSP3_D309Y,NSP5_A193S,NSP6_T77A,NSP1_P80L,NSP12_P323L,NSP5_A191V,Spike_D614G,NSP4_V167L,Spike_L452R)
hCoV-19/USA/WI-MHDL-2021120198/2021	EPI_ISL_7478648	2021-12-06	North America / USA / Wisconsin / Waukesha County	Human	Original	Nanopore Clear Dx	BIP-WV6	AY.103	21J	Delta	GK	(N_G215C,NSP4_W6C,N_D63G,N_R203M,NSP12_G671S,NSP13_I334V,NSP3_K1211N,NS3_S26L,Spike_P681R,Spike_R158del,NSP3_P1228L,Spike_S810L,NS7a_V82A,NSP3_A488S,Spike_F157del,NS8_P36S,NSP4_T492I,NSP14_A394V,Spike_T19R,NS7a_T120I,N_D377Y,M_I82T,Spike_D950N,NS7a_T28I,NS7b_T40I,NSP13_P77L,Spike_E156G,NSP3_P1469S,NSP3_S1877N,Spike_T478K,NSP6_T77A,NSP12_P323L,Spike_D614G,Spike_L452R,NSP4_V167L,Spike_N211S)
hCoV-19/USA/WI-MHDL-2021120205/2021	EPI_ISL_7660946	2021-12-06	North America / USA / Wisconsin / Milwaukee County	Human	Original	Nanopore Clear Dx	BIP-WV6	AY.103	21J	Delta	GK	(N_P365T,N_G215C,N_D63G,N_R203M,NSP12_G671S,NSP13_I334V,NS3_S26L,Spike_P681R,Spike_R158del,NSP3_P1228L,NS7a_V82A,NSP3_A488S,Spike_F157del,NSP4_T492I,NSP14_A394V,Spike_T19R,NS7a_T120I,N_D377Y,M_I82T,Spike_D950N,NS7b_T40I,NSP13_P77L,Spike_E156G,NSP3_P1469S,Spike_T478K,NSP6_T77A,NSP12_P323L,Spike_D614G,Spike_L452R,NSP4_V167L,NSP6_V149F)
hCoV-19/USA/WI-MHDL-2021120206/2021	EPI_ISL_7660959	2021-12-06	North America / USA / Wisconsin / Milwaukee County	Human	Original	Nanopore Clear Dx	BIP-WV6	AY.103	21J	Delta	GK	(N_G215C,N_D63G,N_R203M,NSP12_G671S,NSP13_I334V,NSP3_V477F,NS3_S26L,NSP1_V28A,Spike_P681R,Spike_R158del,NSP3_P1228L,NS8_P38S,NS7a_V82A,NSP3_A488S,Spike_F157del,NSP4_T492I,NSP14_A394V,Spike_T19R,NS7a_T120I,N_D377Y,M_I82T,Spike_D950N,NS7b_T40I,NSP13_P77L,Spike_E156G,NSP3_P1469S,Spike_T478K,NSP6_T77A,NSP12_P323L,Spike_D614G,NSP4_V167L,Spike_L452R)
hCoV-19/USA/WI-MHDL-2021120202/2021	EPI_ISL_7660960	2021-12-06	North America / USA / Wisconsin / Milwaukee County	Human	Original	Nanopore Clear Dx	BIP-WV6	AY.117	21J	Delta	GK	(N_G215C,NS3_A33S,N_D63G,N_R203M,NSP12_G671S,NS3_S26L,NSP13_A454V,Spike_P681R,Spike_R158del,NSP3_P1228L,NS8_E106stop,NS7a_V82A,NSP3_A488S,Spike_F157del,NSP4_T492I,NSP14_A394V,Spike_T19R,NS7a_T120I,N_D377Y,M_I82T,Spike_D950N,NS7b_T40I,NSP13_P77L,Spike_E156G,NSP3_P1469S,Spike_T478K,NSP2_W466L,NSP6_T77A,NSP12_P323L,Spike_D614G,NSP4_V167L,Spike_L452R,NSP3_E1604D,NSP12_R249M,NSP15_S312F)
hCoV-19/USA/WI-MHDL-2021120203/2021	EPI_ISL_7660962	2021-12-06	North America / USA / Wisconsin / Milwaukee County	Human	Original	Nanopore Clear Dx	BIP-WV6	AY.122	21J	Delta	GK	(N_G215C,N_D63G,N_R203M,NSP12_G671S,NS3_S26L,Spike_P681R,NS3_L108F,Spike_R158del,NSP3_P1228L,NS7a_V82A,NSP3_A488S,Spike_F157del,NSP4_T492I,NSP14_A394V,Spike_T19R,NS7a_T120I,NSP2_K81N,N_D377Y,M_I82T,Spike_D950N,NS7b_T40I,NSP13_P77L,Spike_E156G,NSP3_P1469S,Spike_T478K,NS7a_P45L,NSP6_T77A,NSP2_I479L,NSP12_P323L,Spike_D614G,NSP4_V167L,Spike_L452R)
hCoV-19/USA/WI-MHDL-2021120209/2021	EPI_ISL_7660966	2021-12-06	North America / USA / Wisconsin / Milwaukee County	Human	Original	Nanopore Clear Dx	BIP-WV6	AY.98.1	21J	Delta	GK	(N_G215C,N_D63G,N_R203M,NSP12_G671S,NS3_S26L,Spike_P251L,Spike_P681R,Spike_R158del,NSP3_P1228L,NS8_A65S,NS7a_V82A,NSP3_A488S,NSP3_E906D,Spike_F157del,NSP4_T492I,NSP14_A394V,Spike_T19R,NS7a_T120I,N_D377Y,M_I82T,Spike_D950N,NS7b_T40I,NSP13_P77L,Spike_E156G,NSP3_P1469S,Spike_T478K,NSP6_T77A,NSP12_P323L,Spike_D614G,NSP4_V167L,Spike_L452R,NSP3_L1287P,NSP1_E87D)
hCoV-19/USA/WI-MHDL-2021120207/2021	EPI_ISL_7660968	2021-12-06	North America / USA / Wisconsin / Milwaukee County	Human	Original	Nanopore Clear Dx	BIP-WV6	AY.25	21J	Delta	GK	(N_G215C,N_D63G,N_R203M,NSP3_A1769V,NSP12_G671S,NS3_S26L,NSP8_T93I,Spike_P681R,Spike_R158del,NSP3_P1228L,NS7a_G70S,NS7a_V82A,NSP3_A488S,Spike_F157del,NSP4_T492I,NSP14_A394V,Spike_T19R,NS7a_T120I,N_D377Y,M_I82T,Spike_D950N,NS7b_T40I,N_A308S,NSP13_P77L,NS3_L52F,Spike_E156G,NSP3_P1469S,NS7a_Q76stop,NSP6_T77A,NS3_E239Q,NSP9_R39K,NSP4_V103M,NSP12_P323L,Spike_D614G,NS3_E181V,NSP2_Q275K,NSP4_V167L)
hCoV-19/USA/WI-MHDL-2021120474/2021	EPI_ISL_8185105	2021-12-06	North America / USA / Wisconsin / Milwaukee County	Human	Original	Nanopore Clear Dx	BIP-WV6	AY.3	21J	Delta	GK	(N_G215C,N_D63G,N_R203M,NSP12_G671S,NSP6_I162V,NS3_S26L,Spike_P681R,NS3_M260I,Spike_R158del,NSP3_P1228L,NS8_E106stop,NS7a_V82A,NSP3_A488S,Spike_F157del,NSP4_T492I,Spike_T19R,NSP14_A394V,NS7a_T120I,N_D377Y,M_I82T,Spike_D950N,NSP5_A70V,NS7b_T40I,NSP13_P77L,Spike_E156G,NSP3_P1469S,Spike_T478K,NS7a_T61I,NSP6_T77A,NSP12_P323L,Spike_D614G,NSP4_V167L,Spike_L452R,Spike_P26L)
hCoV-19/USA/WI-MHDL-2021120476/2021	EPI_ISL_8185107	2021-12-06	North America / USA / Wisconsin / Milwaukee County	Human	Original	Nanopore Clear Dx	BIP-WV6	AY.44	21J	Delta	GK	(N_G215C,NS8_L60F,NSP2_E201K,N_R203M,NSP12_G671S,NS3_S26L,Spike_P681R,Spike_R158del,NSP3_P1228L,NSP14_V125I,NS7a_V82A,NSP3_A488S,Spike_F157del,NSP4_T492I,NSP14_A394V,Spike_T19R,NS7a_T120I,NSP12_F192V,N_D377Y,NSP13_H164Y,M_I82T,Spike_D950N,NS7b_T40I,NSP3_A1736V,NSP13_P77L,Spike_E156G,NSP3_H1307Y,NSP3_P1469S,Spike_T478K,NS3_T175I,NSP6_T77A,N_D63S,NSP12_P323L,Spike_D614G,NSP3_T1250P,NSP4_V167L,Spike…
hCoV-19/USA/WI-MHDL-2021120477/2021	EPI_ISL_8185108	2021-12-06	North America / USA / Wisconsin / Milwaukee County	Human	Original	Nanopore Clear Dx	BIP-WV6	AY.43	21J	Delta	GK	(N_G215C,N_D63G,N_R203M,NSP12_G671S,NSP4_A380V,NS3_S26L,Spike_P681R,Spike_R158del,NSP3_P1228L,NS7a_V82A,NSP3_A488S,Spike_F157del,NSP4_T492I,NSP14_A394V,Spike_T19R,NS7a_T120I,N_D377Y,M_I82T,Spike_D950N,N_Q9L,NS7b_T40I,NSP13_P77L,Spike_E156G,NSP3_P1469S,NS3_A103T,Spike_T478K,NSP12_K478R,NSP12_L838I,NSP6_T77A,NSP3_L620F,NSP12_P323L,Spike_D614G,NSP4_V167L,Spike_L452R,NSP12_M899V)
hCoV-19/USA/WI-MHDL-2021120478/2021	EPI_ISL_8185109	2021-12-06	North America / USA / Wisconsin / Milwaukee County	Human	Original	Nanopore Clear Dx	BIP-WV6	AY.47	21I	Delta	GK	(N_D63G,N_R203M,NSP3_T1334I,NSP12_G671S,Spike_V289I,N_G18V,NSP6_T181I,NS3_S26L,Spike_P681R,Spike_R158del,NS8_A65S,NSP3_E815D,NS7a_V82A,Spike_F157del,NSP16_G113V,Spike_T19R,NS7a_T120I,Spike_A222V,NS3_R68K,N_D377Y,M_I82T,NSP6_V149A,Spike_D950N,NSP5_P96S,NSP3_P822L,NSP13_P77L,Spike_E156G,NSP4_A446V,Spike_S151T,Spike_T478K,NSP3_P200L,NSP12_P323L,Spike_D614G,Spike_L452R)
hCoV-19/USA/WI-MHDL-2021120510/2021	EPI_ISL_8207633	2021-12-06	North America / USA / Wisconsin / Milwaukee County	Human	Original	Nanopore Clear Dx	BIP-WV6	AY.103	21J	Delta	GK	(N_G215C,N_D63G,N_R203M,NSP12_G671S,NSP13_I334V,NSP14_T372I,NS3_S26L,NSP8_P178H,Spike_A846V,Spike_P681R,Spike_R158del,NSP3_P1228L,NS7a_V82A,NSP3_A488S,Spike_F157del,NSP4_T492I,NSP14_A394V,Spike_T19R,NS7a_T120I,N_D377Y,M_I82T,Spike_D950N,NS7b_T40I,NSP13_P77L,Spike_E156G,NSP3_P1469S,NSP3_K462N,Spike_T478K,NSP6_T77A,NSP12_P323L,Spike_D614G,NSP4_V167L,Spike_L452R,NSP3_L1126S)
hCoV-19/USA/WI-MHDL-2021120513/2021	EPI_ISL_8207636	2021-12-06	North America / USA / Wisconsin / Milwaukee County	Human	Original	Nanopore Clear Dx	BIP-WV6	AY.103	21J	Delta	GK	(N_G215C,N_D63G,N_A208S,N_R203M,NSP12_G671S,NSP2_A306V,NSP13_I334V,NS3_P104S,NS3_S26L,Spike_P681R,Spike_R158del,NSP3_P1228L,NSP3_H290Y,NS7a_V82A,NSP3_A488S,Spike_F157del,NSP4_T492I,NSP14_A394V,Spike_T19R,NS7a_T120I,N_D377Y,M_I82T,Spike_D950N,NS7b_T40I,NSP13_P77L,Spike_E156G,NSP2_G235S,NSP3_P1469S,Spike_T478K,NSP6_T77A,NSP12_P323L,Spike_D614G,NSP4_V167L,Spike_L452R)
hCoV-19/USA/WI-MHDL-2021120514/2021	EPI_ISL_8207637	2021-12-06	North America / USA / Wisconsin / Milwaukee County	Human	Original	Nanopore Clear Dx	BIP-WV6	AY.103	21J	Delta	GK	(N_G215C,N_D63G,N_R203M,NSP12_G671S,NSP13_I334V,NSP14_T372I,NS3_S26L,NSP8_P178H,Spike_A846V,Spike_P681R,NSP3_P1228L,NS7a_V82A,NSP3_A488S,NSP4_T492I,NSP14_A394V,Spike_T19R,NS7a_T120I,N_D377Y,M_I82T,Spike_D950N,NS7b_T40I,NSP13_P77L,NSP3_P1469S,NSP3_K462N,NSP6_T77A,NSP12_P323L,Spike_D614G,NSP4_V167L,NSP3_L1126S)
hCoV-19/USA/WI-MHDL-2021120302/2021	EPI_ISL_7828365	2021-12-07	North America / USA / Wisconsin / Milwaukee County	Human	Original	Illumina MiSeq	DRAGEN COVID lineage v3.5.5	AY.117	21J	Delta	GK	(N_G215C,NS3_A33S,Spike_T95I,N_D63G,N_R203M,NSP12_G671S,Spike_G142D,NS3_S26L,NSP13_A454V,Spike_P681R,Spike_R158del,NSP3_P1228L,NS8_E106stop,NSP3_A488S,Spike_F157del,NSP4_T492I,NSP14_A394V,Spike_T19R,N_D377Y,M_I82T,Spike_D950N,NS7b_T40I,NSP13_P77L,Spike_E156G,NSP3_P1469S,Spike_T478K,NSP2_W466L,NSP6_T77A,NSP12_P323L,Spike_D614G,NSP4_V167L,Spike_L452R,NSP3_E1604D,NSP12_R249M,NSP15_S312F)
hCoV-19/USA/WI-MHDL-2021120307/2021	EPI_ISL_7828367	2021-12-07	North America / USA / Wisconsin / Milwaukee County	Human	Original	Illumina MiSeq	DRAGEN COVID lineage v3.5.5	AY.103	21J	Delta	GK	(N_G215C,N_D63G,N_R203M,NSP12_G671S,NSP13_I334V,NSP1_M85V,NS3_S26L,Spike_K182I,NSP8_P178H,Spike_P681R,NSP3_P1228L,NSP3_A488S,NSP4_T492I,NSP14_A394V,Spike_T19R,N_D377Y,M_I82T,Spike_D950N,NS7b_T40I,NSP13_P77L,NSP3_P1469S,Spike_T478K,NSP6_T77A,NSP12_P323L,Spike_D614G,NSP4_V167L,Spike_L452R)
hCoV-19/USA/WI-MHDL-2021120308/2021	EPI_ISL_7828368	2021-12-07	North America / USA / Wisconsin / Milwaukee County	Human	Original	Illumina MiSeq	DRAGEN COVID lineage v3.5.5	AY.103	21J	Delta	GK	(N_G215C,N_D63G,N_A208S,N_R203M,NSP12_G671S,NSP13_I334V,Spike_G142D,NS3_P104S,NS3_S26L,NSP3_A579T,Spike_P681R,Spike_R158del,NSP3_P1228L,NSP3_A488S,Spike_F157del,NSP4_T492I,Spike_Q677H,NSP14_A394V,Spike_T19R,N_D377Y,M_I82T,Spike_D950N,NS7b_T40I,NSP13_P77L,Spike_E156G,NSP3_P1469S,Spike_T478K,NSP6_T77A,NSP12_P323L,Spike_D614G,NSP4_V167L,Spike_L452R)
hCoV-19/USA/WI-MHDL-2021120309/2021	EPI_ISL_7828369	2021-12-07	North America / USA / Wisconsin / Milwaukee County	Human	Original	Illumina MiSeq	DRAGEN COVID lineage v3.5.5	AY.103	21J	Delta	GK	(N_G215C,N_D63G,N_R203M,NSP12_G671S,NSP13_I334V,NSP2_G339S,NS3_S26L,Spike_P681R,Spike_R158del,NSP3_E815G,NSP3_P1228L,NSP3_A488S,Spike_F157del,NSP4_T492I,NSP14_A394V,Spike_T19R,N_D377Y,NSP3_R568C,M_I82T,Spike_D950N,NS7b_T40I,NSP13_P77L,Spike_E156G,NS3_R68I,NSP3_P1469S,Spike_T478K,NSP6_T77A,NSP12_P323L,Spike_D614G,Spike_Q414K,NSP4_V167L,Spike_L452R)
hCoV-19/USA/WI-MHDL-2021120310/2021	EPI_ISL_7828370	2021-12-07	North America / USA / Wisconsin / Milwaukee County	Human	Original	Illumina MiSeq	DRAGEN COVID lineage v3.5.5	AY.44	21J	Delta	GK	(N_G215C,N_D63G,N_R203M,NSP12_G671S,Spike_E484K,Spike_G142D,NS3_S26L,Spike_P681R,Spike_R158del,NSP3_P1228L,NS7a_V82A,NSP3_A488S,Spike_F157del,Spike_D253G,NSP4_T492I,NSP14_A394V,Spike_T19R,NS7a_T120I,NSP12_F192V,N_D377Y,M_I82T,Spike_D950N,NS8_W45C,NS7b_T40I,NSP3_A1736V,NSP13_P77L,Spike_E156G,NSP3_P1469S,NSP12_G823C,NSP14_A220V,Spike_T478K,NSP6_T77A,NSP12_T26I,NSP12_P323L,Spike_D614G,NSP4_V167L,Spi…
hCoV-19/USA/WI-MHDL-2021120305/2021	EPI_ISL_7829647	2021-12-07	North America / USA / Wisconsin / Milwaukee County	Human	Original	Illumina MiSeq	DRAGEN COVID lineage v3.5.5	AY.103	21J	Delta	GK	(N_G215C,N_D63G,N_A208S,N_R203M,NSP12_G671S,NSP13_I334V,Spike_G142D,NS3_P104S,NS3_S26L,NSP3_A579T,Spike_P681R,Spike_R158del,NSP3_P1228L,NS7a_V82A,NSP3_A488S,Spike_F157del,NSP4_T492I,Spike_Q677H,NSP14_A394V,Spike_T19R,NS7a_T120I,N_D377Y,M_I82T,Spike_D950N,NS7b_T40I,NSP13_P77L,Spike_E156G,NSP3_P1469S,Spike_T478K,NSP6_T77A,NSP12_P323L,Spike_D614G,NSP4_V167L,Spike_L452R)
hCoV-19/USA/WI-MHDL-2021120306/2021	EPI_ISL_7829648	2021-12-07	North America / USA / Wisconsin / Milwaukee County	Human	Original	Illumina MiSeq	DRAGEN COVID lineage v3.5.5	AY.103	21J	Delta	GK	(N_G215C,N_D63G,N_A208S,N_R203M,NSP12_G671S,NSP13_I334V,Spike_G142D,NS3_P104S,NS3_S26L,NSP3_A579T,Spike_P681R,Spike_R158del,NSP3_P1228L,NSP3_A488S,Spike_F157del,NSP4_T492I,Spike_Q677H,NSP14_A394V,Spike_T19R,N_D377Y,M_I82T,Spike_D950N,NS7b_T40I,NSP13_P77L,Spike_E156G,NSP3_P1469S,Spike_T478K,NSP6_T77A,NSP12_P323L,Spike_D614G,NSP4_V167L,Spike_L452R)
hCoV-19/USA/WI-MHDL-2022010122/2021	EPI_ISL_8565325	2021-12-07	North America / USA / Wisconsin / Milwaukee County	Human	Original	Illumina MiSeq	DRAGEN COVID lineage v3.5.5	AY.43	21J	Delta	GK	(N_G215C,N_D63G,N_R203M,NSP12_G671S,Spike_G142D,NS3_S26L,Spike_P681R,Spike_R158del,NSP3_P1228L,NSP15_T33I,NS7a_V82A,NSP3_A488S,Spike_F157del,NSP4_T492I,NSP14_A394V,Spike_T19R,NS7a_T120I,N_D377Y,M_I82T,Spike_D950N,N_Q9L,NS7b_T40I,NSP13_P77L,Spike_E156G,NSP3_P1469S,Spike_P1079S,Spike_T478K,NSP12_L838I,NSP6_T77A,NSP12_P323L,Spike_D614G,NSP1_D48N,NSP4_V167L,NSP6_L37F,Spike_S477G)
hCoV-19/USA/WI-MHDL-2022010156/2021	EPI_ISL_8565353	2021-12-07	North America / USA / Wisconsin / Milwaukee County	Human	Original	Illumina MiSeq	DRAGEN COVID lineage v3.5.5	AY.103	21J	Delta	GK	(N_G215C,N_D63G,N_R203M,NSP12_G671S,NSP13_I334V,Spike_G142D,NSP6_L231F,NS3_S26L,NSP3_Y356H,Spike_P681R,Spike_R158del,NSP3_P1228L,NS8_E106stop,NS7a_V82A,NSP3_A488S,Spike_F157del,NSP4_T492I,NSP14_A394V,Spike_T19R,NS7a_T120I,N_D377Y,M_I82T,Spike_D950N,NS7b_T40I,NSP13_P77L,NSP4_A58V,Spike_E156G,NSP3_P1469S,Spike_T478K,NSP6_T77A,NSP12_P323L,Spike_D614G,NSP4_V167L,NSP6_L37F,Spike_L452R)
hCoV-19/USA/WI-MHDL-2022010157/2021	EPI_ISL_8565354	2021-12-07	North America / USA / Wisconsin / Milwaukee County	Human	Original	Illumina MiSeq	DRAGEN COVID lineage v3.5.5	AY.103	21J	Delta	GK	(N_G215C,N_D63G,N_R203M,NS3_H78Y,NSP12_G671S,NSP13_I334V,Spike_G142D,Spike_R21T,NS3_S26L,NSP3_Y1185C,NSP8_P178H,Spike_P681R,Spike_R158del,NSP3_P1228L,NS7a_V82A,NSP3_A488S,Spike_F157del,NSP4_T492I,NSP14_A394V,Spike_T19R,NS7a_T120I,N_D377Y,M_I82T,Spike_D950N,NS7b_T40I,NSP13_P77L,Spike_E156G,NSP3_P1469S,Spike_T478K,NSP6_T77A,NSP12_P323L,NS7b_L14S,Spike_D614G,NSP4_V167L,Spike_L452R)
hCoV-19/USA/WI-MHDL-2022010158/2021	EPI_ISL_8565355	2021-12-07	North America / USA / Wisconsin / Milwaukee County	Human	Original	Illumina MiSeq	DRAGEN COVID lineage v3.5.5	AY.103	21J	Delta	GK	(N_G215C,N_D63G,N_R203M,NS3_H78Y,NSP12_G671S,NSP13_I334V,Spike_G142D,Spike_R21T,NS3_S26L,NSP8_P178H,Spike_P681R,Spike_R158del,NSP3_P1228L,NS7a_V82A,NSP3_A488S,Spike_F157del,NSP4_T492I,NSP14_A394V,Spike_T19R,NS7a_T120I,N_D377Y,M_I82T,Spike_D950N,NS7b_T40I,NSP13_P77L,Spike_E156G,NSP3_P1469S,Spike_T478K,NSP6_T77A,NSP12_P323L,NS7b_L14S,Spike_D614G,NSP4_V167L,Spike_L452R)
hCoV-19/USA/WI-MHDL-2022010159/2021	EPI_ISL_8565356	2021-12-07	North America / USA / Wisconsin / Milwaukee County	Human	Original	Illumina MiSeq	DRAGEN COVID lineage v3.5.5	AY.100	21J	Delta	GK	(N_G215C,Spike_T95I,N_D63G,N_R203M,NSP12_G671S,Spike_G142D,NSP2_P129L,NS3_S26L,NS3_W69C,NSP13_A296S,Spike_P681R,Spike_R158del,NSP3_P1228L,NS7a_S83L,N_P326S,NS7a_V82A,NSP3_A488S,Spike_F157del,NSP4_T492I,NSP14_A394V,Spike_T19R,NS7a_T120I,N_D377Y,M_I82T,Spike_D950N,NS7b_T40I,NSP13_P77L,Spike_E156G,NSP3_P1469S,NS8_Y31F,Spike_T478K,NSP6_G48S,NSP6_T77A,NSP12_P323L,Spike_D614G,NSP4_V167L,NSP6_L37F,Spike…
hCoV-19/USA/WI-MHDL-2022010160/2021	EPI_ISL_8565357	2021-12-07	North America / USA / Wisconsin / Milwaukee County	Human	Original	Illumina MiSeq	DRAGEN COVID lineage v3.5.5	AY.103	21J	Delta	GK	(N_G215C,N_D63G,N_R203M,NSP12_G671S,NSP13_I334V,Spike_G142D,NS3_S26L,Spike_P681R,Spike_R158del,NSP3_P1228L,NS7a_V82A,NSP3_A488S,Spike_F157del,NSP4_T492I,NSP8_L184F,NSP14_A394V,Spike_T19R,NS7a_T120I,N_D377Y,M_I82T,Spike_D950N,NS7b_T40I,NSP13_P77L,Spike_E156G,NSP3_P1469S,Spike_T478K,NSP14_S418I,NSP6_T77A,Spike_M731I,NSP12_P323L,Spike_D614G,NSP4_V167L,Spike_L452R,NSP6_V149F)
hCoV-19/USA/WI-MHDL-2022010161/2021	EPI_ISL_8565358	2021-12-07	North America / USA / Wisconsin / Milwaukee County	Human	Original	Illumina MiSeq	DRAGEN COVID lineage v3.5.5	AY.103	21J	Delta	GK	(N_G215C,N_D63G,N_R203M,NSP12_G671S,NSP13_I334V,Spike_G142D,Spike_R646H,NS3_S26L,Spike_P681R,Spike_R158del,NSP3_P1228L,NSP3_A1819V,NS7a_V82A,NSP3_A488S,Spike_F157del,NSP4_T492I,NSP14_A394V,Spike_T19R,NS7a_T120I,N_D377Y,M_I82T,NSP6_Q208H,Spike_D950N,NS7b_T40I,NSP13_P77L,Spike_E156G,NSP3_P1469S,Spike_T478K,NSP6_T77A,NSP12_P323L,Spike_D614G,NSP4_V167L,Spike_L452R)
hCoV-19/USA/WI-MHDL-2022010162/2021	EPI_ISL_8565359	2021-12-07	North America / USA / Wisconsin / Milwaukee County	Human	Original	Illumina MiSeq	DRAGEN COVID lineage v3.5.5	AY.39	21J	Delta	GK	(N_G215C,Spike_T95I,N_D63G,N_R203M,NSP12_G671S,NSP16_Q238H,NSP3_E195D,Spike_G142D,NSP13_T481M,NS3_S26L,Spike_P681R,Spike_R158del,NSP3_P1228L,NS7a_V82A,NSP3_A488S,Spike_F157del,NSP4_T492I,NSP14_A394V,Spike_T19R,NS7a_T120I,N_D377Y,M_I82T,Spike_D950N,NS7b_T40I,NSP13_P77L,Spike_E156G,NSP3_P1469S,Spike_T478K,NS7a_V71I,NSP6_T77A,NSP12_P323L,Spike_D614G,NSP4_V167L,Spike_L452R)
hCoV-19/USA/WI-MHDL-2021120371/2021	EPI_ISL_7744421	2021-12-07	North America / USA / Wisconsin / Racine County	Human	Original	Nanopore Clear Dx	BIP-WV6	AY.103	21J	Delta	GK	(N_G215C,N_D63G,N_R203M,NSP12_G671S,NSP13_I334V,M_L17I,NS3_S26L,Spike_P681R,Spike_R158del,NSP3_P1228L,NS7a_V82A,NSP3_A488S,Spike_F157del,NSP4_T492I,NSP14_A394V,Spike_T19R,NS7a_T120I,N_D377Y,M_I82T,Spike_D950N,NS7b_T40I,NSP13_P77L,Spike_E156G,NSP3_P1469S,Spike_T478K,NSP6_T77A,NSP12_P323L,Spike_D614G,Spike_L452R,NSP4_V167L)
hCoV-19/USA/WI-MHDL-2021120448/2021	EPI_ISL_7979271	2021-12-07	North America / USA / Wisconsin / Waukesha County	Human	Original	Nanopore Clear Dx	BIP-WV6	BA.1.17	21K	Omicron	GRA	(NSP5_P132H,Spike_H69del,Spike_T95I,Spike_A67V,NSP6_S106del,Spike_N969K,Spike_H655Y,Spike_N856K,N_R203K,Spike_G142D,NSP3_A1892T,Spike_Q954H,Spike_G339D,N_P13L,NSP3_L1266I,N_R32del,NSP3_S1265del,NSP14_I42V,Spike_P681H,Spike_Y144del,M_Q19E,N_S33del,NSP4_T492I,NSP6_L105del,Spike_N679K,Spike_N764K,NSP6_G107del,N_E31del,NSP3_K38R,NSP6_I189V,Spike_T547K,Spike_D796Y,N_G204R,Spike_V70del,Spike_L981F,Spik…
hCoV-19/USA/WI-MHDL-2021120449/2021	EPI_ISL_7979272	2021-12-07	North America / USA / Wisconsin / Waukesha County	Human	Original	Nanopore Clear Dx	BIP-WV6	BA.1.15	21K	Omicron	GRA	(NSP5_P132H,Spike_H69del,Spike_T95I,Spike_A67V,NSP3_L368F,NSP6_S106del,Spike_N969K,Spike_H655Y,Spike_N856K,N_R203K,Spike_G142D,NSP3_A1892T,Spike_Q954H,Spike_G339D,NS3_L106F,N_P13L,NSP3_L1266I,N_R32del,NSP3_S1265del,NSP14_I42V,Spike_P681H,Spike_Y144del,M_Q19E,N_S33del,NSP4_T492I,NSP6_L105del,Spike_N679K,Spike_N764K,NSP6_G107del,N_E31del,NSP3_K38R,NSP6_I189V,Spike_T547K,Spike_D796Y,N_G204R,N_D343G,…
hCoV-19/USA/WI-MHDL-2021120475/2021	EPI_ISL_8185106	2021-12-07	North America / USA / Wisconsin / Milwaukee County	Human	Original	Nanopore Clear Dx	BIP-WV6	AY.120.1	21J	Delta	GK	(N_G215C,N_D63G,N_R203M,NSP12_G671S,NS7a_L56del,NS3_S26L,Spike_P681R,NSP3_S1230F,Spike_R158del,NS7a_T57del,NSP3_P1228L,NS7a_T61del,NS7a_A55del,NS7a_C58del,NS7a_V82A,Spike_F157del,NSP3_A488S,NSP4_T492I,NS7a_F54del,NSP14_A394V,Spike_T19R,NS7a_T120I,N_D377Y,M_I82T,Spike_D950N,NS7b_T40I,NSP13_P77L,NS7a_S60del,Spike_E156G,NSP3_P1469S,Spike_T478K,NSP16_M270V,NS7a_Q62del,NSP6_T77A,NSP12_P323L,Spike_D614…
hCoV-19/USA/WI-MHDL-2021120484/2021	EPI_ISL_8185111	2021-12-07	North America / USA / Wisconsin / Milwaukee County	Human	Original	Nanopore Clear Dx	BIP-WV6	AY.44	21J	Delta	GK	(N_G215C,NS8_L60F,NSP2_E201K,N_D63G,N_R203M,NSP12_G671S,NS3_S26L,Spike_P681R,Spike_R158del,NSP3_P1228L,NSP14_V125I,NSP13_T599I,NS7a_V82A,NSP3_A488S,Spike_F157del,NSP4_T492I,NSP14_A394V,Spike_T19R,NS7a_T120I,NSP12_F192V,N_D377Y,NSP13_H164Y,M_I82T,Spike_D950N,NS7b_T40I,NSP3_A1736V,NSP13_P77L,Spike_E156G,NSP3_H1307Y,NSP3_P1469S,Spike_T478K,NSP6_T77A,NSP12_P323L,Spike_D614G,NSP3_T1250P,NSP4_V167L,Spi…
hCoV-19/USA/WI-MHDL-2021120486/2021	EPI_ISL_8185113	2021-12-07	North America / USA / Wisconsin / Milwaukee County	Human	Original	Nanopore Clear Dx	BIP-WV6	AY.113	21J	Delta	GK	(N_G215C,N_D63G,N_R203M,NSP12_G671S,NSP12_P264S,NS3_S26L,NSP15_D91G,Spike_P681R,Spike_R158del,NSP3_P1228L,NSP4_T204I,NS7a_V82A,NSP3_A488S,Spike_F157del,NSP4_T492I,NSP14_A394V,Spike_T19R,NS7a_T120I,N_D377Y,M_I82T,Spike_D950N,NS7b_T40I,NSP13_P77L,Spike_E156G,NSP3_P1469S,Spike_T478K,NSP6_T77A,NSP12_P323L,NSP5_K90R,Spike_D614G,NSP4_V167L,Spike_L452R)
hCoV-19/USA/WI-MHDL-2021120487/2021	EPI_ISL_8185114	2021-12-07	North America / USA / Wisconsin / Milwaukee County	Human	Original	Nanopore Clear Dx	BIP-WV6	AY.103	21J	Delta	GK	(N_G215C,N_D63G,N_R203M,NSP12_G671S,NSP13_I334V,NS3_V77F,NS3_S26L,NSP2_K239N,Spike_P681R,Spike_R158del,NS8_P36L,NSP3_P1228L,NS7a_V82A,NSP3_A488S,Spike_F157del,NSP4_T492I,NSP14_A394V,Spike_T19R,NS7a_T120I,N_D377Y,NSP3_S794L,M_I82T,Spike_D950N,NS7b_T40I,NSP13_P77L,Spike_E156G,NSP3_P1469S,Spike_T478K,NSP6_T77A,NSP12_P323L,Spike_D614G,NSP4_V167L,Spike_L452R)
hCoV-19/USA/WI-MHDL-2021120488/2021	EPI_ISL_8185115	2021-12-07	North America / USA / Wisconsin / Milwaukee County	Human	Original	Nanopore Clear Dx	BIP-WV6	BA.1.17	21K	Omicron	GRA	(NSP5_P132H,Spike_H69del,Spike_T95I,Spike_A67V,NSP6_S106del,Spike_N969K,Spike_H655Y,Spike_N856K,N_R203K,Spike_G142D,NSP3_A1892T,Spike_Q954H,Spike_G339D,N_P13L,NSP3_L1266I,N_R32del,NSP3_S1265del,NSP14_I42V,Spike_P681H,Spike_Y144del,M_Q19E,N_S33del,NSP4_T492I,NSP6_L105del,Spike_N679K,Spike_N764K,NSP6_G107del,N_E31del,NSP3_K38R,NSP6_I189V,Spike_T547K,Spike_D796Y,N_G204R,Spike_V70del,Spike_L981F,Spik…
hCoV-19/USA/WI-MHDL-2021120489/2021	EPI_ISL_8185116	2021-12-07	North America / USA / Wisconsin / Milwaukee County	Human	Original	Nanopore Clear Dx	BIP-WV6	BA.1.17	21K	Omicron	GRA	(NSP5_P132H,Spike_H69del,Spike_T95I,Spike_A67V,NSP6_S106del,Spike_N969K,Spike_H655Y,Spike_N856K,N_R203K,Spike_G142D,NSP3_A1892T,Spike_Q954H,Spike_G339D,N_P13L,NSP3_L1266I,N_R32del,NSP3_S1265del,NSP14_I42V,Spike_P681H,Spike_Y144del,M_Q19E,N_S33del,NSP4_T492I,NSP6_L105del,Spike_N679K,Spike_N764K,NSP6_G107del,N_E31del,NSP3_K38R,NSP6_I189V,Spike_T547K,Spike_D796Y,N_G204R,E_T9I,Spike_V70del,Spike_L981…
hCoV-19/USA/WI-MHDL-2021120492/2021	EPI_ISL_8185119	2021-12-07	North America / USA / Wisconsin / Milwaukee County	Human	Original	Nanopore Clear Dx	BIP-WV6	AY.103	21J	Delta	GK	(N_G215C,N_D63G,N_R203M,NSP12_G671S,NSP13_I334V,NS3_S26L,Spike_P681R,NS8_W45L,Spike_R158del,NSP3_P1228L,NS7a_V82A,NSP3_A488S,Spike_F157del,NSP4_T492I,NSP14_A394V,Spike_T19R,NS7a_T120I,NS8_C83F,N_D377Y,M_I82T,Spike_D950N,NS7b_T40I,NSP13_P77L,Spike_E156G,NSP3_P1469S,Spike_T478K,NSP6_T77A,NSP14_S137I,N_P258L,NSP12_P323L,Spike_D614G,Spike_L452R,NSP4_V167L)
hCoV-19/USA/WI-MHDL-2021120493/2021	EPI_ISL_8185120	2021-12-07	North America / USA / Wisconsin / Milwaukee County	Human	Original	Nanopore Clear Dx	BIP-WV6	AY.103	21J	Delta	GK	(N_G215C,N_D63G,N_R203M,NSP12_G671S,NSP13_I334V,NS3_S26L,Spike_P681R,Spike_R158del,NS8_C25Y,NSP3_P1228L,NS7a_V82A,NSP3_A488S,Spike_F157del,NSP4_T492I,N_D144H,NSP14_A394V,Spike_T19R,NS7a_T120I,NSP12_P227L,N_D377Y,M_I82T,Spike_D950N,NS7b_T40I,NSP13_P77L,Spike_E156G,NSP8_K37N,NSP3_P1469S,Spike_T478K,NSP6_L260F,NSP6_T77A,NSP12_P323L,Spike_D614G,NSP4_V167L,Spike_L452R)
hCoV-19/USA/WI-MHDL-2021120494/2021	EPI_ISL_8185121	2021-12-07	North America / USA / Wisconsin / Milwaukee County	Human	Original	Nanopore Clear Dx	BIP-WV6	AY.44	21J	Delta	GK	(N_G215C,NSP3_A1711V,N_D63G,N_R203M,NSP12_G671S,NS3_S26L,Spike_P681R,Spike_R158del,NSP3_P1228L,NS7a_V82A,NSP3_A488S,Spike_F157del,NSP4_T492I,NSP14_A394V,Spike_T19R,NS7a_T120I,NSP12_F192V,N_D377Y,M_I82T,Spike_D950N,NS8_W45C,NS7b_T40I,NSP3_A1736V,NSP13_P77L,Spike_E156G,NSP3_P1469S,NSP3_M1441I,NSP6_T77A,NSP12_P323L,Spike_D614G,NSP4_V167L,NSP8_T141M)
hCoV-19/USA/WI-MHDL-2021120495/2021	EPI_ISL_8185122	2021-12-07	North America / USA / Wisconsin / Milwaukee County	Human	Original	Nanopore Clear Dx	BIP-WV6	AY.117	21J	Delta	GK	(N_G215C,N_D63G,N_R203M,NSP12_G671S,NSP13_Q518H,NS3_S26L,Spike_P681R,Spike_R158del,NSP3_I335V,NSP3_P1228L,NS7a_V82A,NSP3_A488S,Spike_F157del,NSP4_T492I,NSP13_T214I,NSP14_A394V,Spike_T19R,NS7a_T120I,N_D377Y,M_I82T,M_I201V,Spike_D950N,NS7b_T40I,NSP13_P77L,Spike_E156G,Spike_T604I,NSP3_P1469S,Spike_T478K,NSP2_W466L,NSP2_K335Q,NSP6_T77A,NSP12_P323L,NSP12_A706T,Spike_D614G,NSP4_V167L,Spike_L452R,NSP12_…
hCoV-19/USA/WI-MHDL-2021120496/2021	EPI_ISL_8185123	2021-12-07	North America / USA / Wisconsin / Milwaukee County	Human	Original	Nanopore Clear Dx	BIP-WV6	AY.44	21J	Delta	GK	(N_G215C,NS8_L60F,N_D63G,N_R203M,NSP12_G671S,NS3_S26L,Spike_P681R,Spike_R158del,NSP3_P1228L,NS7a_V82A,NSP3_A488S,Spike_F157del,NSP4_T492I,NSP14_A394V,Spike_T19R,NS7a_T120I,NSP12_F192V,N_D377Y,NSP13_H164Y,M_I82T,Spike_D950N,NS7b_T40I,NSP3_A1736V,NSP12_A16V,NSP13_P77L,Spike_E156G,NSP3_H1307Y,NSP3_P1469S,Spike_T478K,NSP6_T77A,NSP12_P323L,Spike_D614G,NSP4_V167L,Spike_L452R)
hCoV-19/USA/WI-MHDL-2021120498/2021	EPI_ISL_8185124	2021-12-07	North America / USA / Wisconsin / Milwaukee County	Human	Original	Nanopore Clear Dx	BIP-WV6	AY.103	21J	Delta	GK	(N_G215C,NSP3_T1198K,N_D63G,N_R203M,NSP12_G671S,NSP3_L312F,NSP13_I334V,NS3_S26L,NS3_P258del,Spike_P681R,Spike_R158del,NSP3_P1228L,NS7a_V82A,NSP3_A488S,Spike_F157del,NSP4_T492I,NSP14_A394V,Spike_T19R,NS7a_T120I,N_D377Y,NS3_V256del,M_I82T,NS3_S166L,Spike_D950N,M_T7A,NS7b_T40I,NSP13_P77L,Spike_E156G,NS7a_H47Y,NSP3_P1469S,Spike_T478K,NSP6_T77A,NSP12_P323L,Spike_D614G,NS3_N257del,NSP4_V167L,Spike_L452…
hCoV-19/USA/WI-MHDL-2022010102/2021	EPI_ISL_8594414	2021-12-07	North America / USA / Wisconsin / Milwaukee County	Human	Original	Nanopore Clear Dx	BIP-WV6	AY.39	21J	Delta	GK	(NS3_D155H,N_G215C,N_D63G,N_R203M,NSP7_T81I,NSP12_G671S,NSP16_Q238H,NS3_S26L,NSP4_T113K,Spike_P681R,Spike_R158del,NSP3_P1228L,NS7a_V82A,NSP3_A488S,Spike_F157del,NSP4_T492I,NSP12_I856V,NSP14_A394V,Spike_T19R,NS7a_T120I,N_D377Y,M_I82T,NSP4_S137L,Spike_D950N,NS7b_T40I,NSP13_P77L,NS3_P240L,Spike_E156G,NSP3_P1469S,Spike_T478K,NS7a_V71I,NSP6_T77A,NSP12_P323L,Spike_D614G,NSP4_V167L,Spike_L452R)
hCoV-19/USA/WI-MHDL-2022010103/2021	EPI_ISL_8594415	2021-12-07	North America / USA / Wisconsin / Milwaukee County	Human	Original	Nanopore Clear Dx	BIP-WV6	AY.103	21J	Delta	GK	(N_G215C,N_D63G,N_R203M,NSP12_G671S,NSP13_I334V,NS3_V77F,NS3_S26L,NSP4_A146S,Spike_P681R,Spike_R158del,NSP3_P1228L,NS7a_V82A,NSP3_A488S,Spike_F157del,NSP4_T492I,NSP14_A394V,Spike_T19R,NS7a_T120I,N_D377Y,NSP3_S794L,M_I82T,Spike_D950N,NS7b_T40I,NSP13_P77L,Spike_E156G,NSP3_P1469S,Spike_T478K,NSP6_T77A,NSP12_P323L,Spike_D614G,NSP4_V167L,Spike_L452R)
hCoV-19/USA/WI-MHDL-2022010104/2021	EPI_ISL_8594416	2021-12-07	North America / USA / Wisconsin / Milwaukee County	Human	Original	Nanopore Clear Dx	BIP-WV6	AY.44	21J	Delta	GK	(N_G215C,N_D63G,N_R203M,NSP12_G671S,NS3_W131C,NS3_S26L,Spike_P681R,Spike_R158del,NSP3_P1228L,NS7a_V82A,NSP3_A488S,Spike_F157del,NSP4_T492I,NSP14_A394V,Spike_T19R,NS7a_T120I,NSP12_F192V,N_D377Y,M_I82T,Spike_D950N,NS8_W45C,NS7b_T40I,NSP3_A1736V,NSP13_P77L,Spike_E156G,NSP3_P1469S,NSP12_G823C,Spike_T478K,NSP6_T77A,NSP12_T26I,NSP12_P323L,Spike_D614G,NSP4_V167L,Spike_L452R)
hCoV-19/USA/WI-MHDL-2022010105/2021	EPI_ISL_8594417	2021-12-07	North America / USA / Wisconsin / Milwaukee County	Human	Original	Nanopore Clear Dx	BIP-WV6	AY.44	21J	Delta	GK	(N_G215C,NS8_L60F,N_R203M,NSP12_G671S,NS3_S26L,Spike_P681R,Spike_R158del,NSP3_P1228L,NSP14_V125I,NSP2_S128L,NS7a_V82A,NSP3_A488S,Spike_F157del,NSP4_T492I,NSP14_A394V,Spike_T19R,NS7a_T120I,NSP12_F192V,N_D377Y,NSP13_H164Y,M_I82T,Spike_D950N,NS7b_T40I,NSP3_A1736V,NSP13_P77L,NSP7_A30V,Spike_E156G,NSP3_H1307Y,NSP3_P1469S,Spike_T478K,NSP6_T77A,N_D63S,NSP12_P323L,Spike_D614G,NSP4_V167L,Spike_L452R)
hCoV-19/USA/WI-MHDL-2022010106/2021	EPI_ISL_8594418	2021-12-07	North America / USA / Wisconsin / Milwaukee County	Human	Original	Nanopore Clear Dx	BIP-WV6	AY.103	21J	Delta	GK	(N_G215C,N_D63G,N_R203M,NSP12_G671S,NSP13_I334V,Spike_H1159Y,NSP9_T19I,NS3_S26L,Spike_P681R,Spike_R158del,NS8_C25Y,NSP3_P1228L,NS7a_V82A,NSP3_A488S,Spike_F157del,NSP4_T492I,NSP14_A394V,Spike_T19R,NS7a_T120I,N_D377Y,M_I82T,Spike_D950N,NS7b_T40I,NSP13_P77L,Spike_E156G,NSP15_K316R,NSP3_P1469S,Spike_T478K,NSP6_T77A,NSP12_P323L,Spike_D614G,NSP4_V167L,Spike_L452R)
hCoV-19/USA/WI-MHDL-2022010107/2021	EPI_ISL_8594419	2021-12-07	North America / USA / Wisconsin / Milwaukee County	Human	Original	Nanopore Clear Dx	BIP-WV6	AY.3	21J	Delta	GK	(N_G215C,N_D63G,N_R203M,Spike_I1221V,NSP12_G671S,NSP6_I162V,NS7a_V82del,NS3_S26L,NS7a_S83T,Spike_P681R,Spike_R158del,NSP3_P1228L,NSP3_A488S,Spike_F157del,NSP4_T492I,NSP14_A394V,Spike_T19R,NS7a_T120I,N_D377Y,M_I82T,Spike_D950N,NS7b_T40I,NSP13_P77L,Spike_E156G,NS7a_S81del,NSP3_T656I,NSP3_L1837F,NSP3_P1469S,Spike_T478K,NSP6_T77A,NSP12_P323L,Spike_D614G,NSP4_V167L,Spike_L452R,NS7a_R80del)
hCoV-19/USA/WI-MHDL-2022010108/2021	EPI_ISL_8594420	2021-12-07	North America / USA / Wisconsin / Milwaukee County	Human	Original	Nanopore Clear Dx	BIP-WV6	AY.103	21J	Delta	GK	(N_P365T,N_G215C,N_D63G,N_R203M,NSP12_G671S,NSP13_I334V,NS3_S26L,Spike_P681R,Spike_R158del,NSP3_P1228L,NS7a_V82A,NSP3_A488S,Spike_F157del,NSP4_T492I,NSP14_A394V,Spike_T19R,NS7a_T120I,N_D377Y,M_I82T,Spike_D950N,NS7b_T40I,NSP13_P77L,Spike_E156G,NSP3_P1469S,Spike_T478K,NSP6_T77A,NSP12_P323L,Spike_D614G,Spike_L452R,NSP4_V167L,NSP6_V149F)
hCoV-19/USA/WI-MHDL-2022010110/2021	EPI_ISL_8594422	2021-12-07	North America / USA / Wisconsin / Milwaukee County	Human	Original	Nanopore Clear Dx	BIP-WV6	AY.103	21J	Delta	GK	(N_G215C,N_D63G,N_R203M,NSP12_G671S,NSP13_I334V,NSP2_G438S,NS3_S26L,Spike_P681R,Spike_R158del,NSP3_P1228L,NS7a_V82A,NSP3_A488S,Spike_F157del,NSP4_T492I,NSP14_A394V,Spike_T19R,NS7a_T120I,N_D377Y,M_I82T,NSP13_P300L,Spike_D950N,NS7b_T40I,NSP13_P77L,Spike_E156G,NSP3_P1469S,Spike_T478K,NSP6_T77A,NSP12_P323L,Spike_D614G,NSP4_V167L,Spike_L452R)
hCoV-19/USA/WI-MHDL-2022010111/2021	EPI_ISL_8594423	2021-12-07	North America / USA / Wisconsin / Milwaukee County	Human	Original	Nanopore Clear Dx	BIP-WV6	AY.3	21J	Delta	GK	(N_G215C,NSP13_V193L,NS3_A33S,NSP3_S400I,N_D63G,N_R203M,NSP3_S1807F,NSP12_G671S,NSP6_I162V,NS3_S26L,Spike_P681R,Spike_R158del,NSP3_S1296F,NSP3_P1228L,NS7a_V82A,NSP3_A488S,Spike_F157del,NSP4_T492I,NSP14_A394V,Spike_T19R,NS7a_T120I,N_D377Y,M_I82T,Spike_D950N,Spike_S477N,NSP13_P77L,Spike_E156G,NSP3_P1469S,Spike_T478K,NSP6_T77A,M_K15Q,NS6_R20S,NSP12_P323L,Spike_D614G,NSP4_V167L,Spike_L452R,NSP16_T140…
hCoV-19/USA/WI-MHDL-2022010112/2021	EPI_ISL_8594424	2021-12-07	North America / USA / Wisconsin / Milwaukee County	Human	Original	Nanopore Clear Dx	BIP-WV6	AY.103	21J	Delta	GK	(N_G215C,N_D63G,N_R203M,NSP12_G671S,NSP13_I334V,NSP3_A1642V,NSP6_K270R,NS3_S26L,Spike_P681R,Spike_R158del,NSP3_P1228L,NS7a_V82A,NSP3_A488S,Spike_F157del,NSP4_T492I,NS6_Q8E,NSP14_A394V,Spike_T19R,NS7a_T120I,N_D377Y,M_I82T,Spike_D950N,NS7b_T40I,NSP13_P77L,Spike_E156G,NSP2_H194Y,NSP3_P1469S,Spike_T478K,NSP6_T77A,NSP12_P323L,Spike_D614G,NSP4_V167L,Spike_L452R,Spike_N354T,NSP13_M274I)
hCoV-19/USA/WI-MHDL-2022010113/2021	EPI_ISL_8594425	2021-12-07	North America / USA / Wisconsin / Milwaukee County	Human	Original	Nanopore Clear Dx	BIP-WV6	AY.119	21J	Delta	GK	(N_G215C,Spike_P809S,N_D63G,N_R203M,NSP12_G671S,NSP4_V13F,NS3_S26L,Spike_P681R,Spike_R158del,NSP4_L438F,NSP3_P1228L,NSP9_T24I,NS7a_V82A,NSP3_A488S,Spike_F157del,NSP4_T492I,NSP14_A394V,Spike_T19R,NS7a_T120I,N_D377Y,M_I82T,Spike_D950N,NS7b_T40I,NSP13_P77L,NSP14_A323S,Spike_E156G,NSP3_P1469S,NSP4_A92V,Spike_T478K,NSP6_T77A,NSP12_P323L,Spike_D614G,NSP4_V167L,Spike_L452R)
hCoV-19/USA/WI-MHDL-2022010114/2021	EPI_ISL_8594426	2021-12-07	North America / USA / Wisconsin / Milwaukee County	Human	Original	Nanopore Clear Dx	BIP-WV6	AY.103	21J	Delta	GK	(N_G215C,N_D63G,N_R203M,NSP12_G671S,NSP13_I334V,N_S194L,NS3_S26L,Spike_P681R,Spike_I434V,Spike_R158del,NSP3_P1228L,NS7a_V82A,NSP3_A488S,Spike_F157del,NSP4_T492I,NSP14_A394V,Spike_T19R,NS7a_T120I,N_D377Y,M_I82T,Spike_D950N,NS7b_T40I,NSP13_P77L,Spike_E156G,NSP3_P1469S,Spike_T478K,NSP6_T77A,NSP12_P323L,Spike_D614G,Spike_L452R,NSP4_V167L)
hCoV-19/USA/WI-MHDL-2022010115/2021	EPI_ISL_8594427	2021-12-07	North America / USA / Wisconsin / Milwaukee County	Human	Original	Nanopore Clear Dx	BIP-WV6	AY.25	21J	Delta	GK	(N_G215C,N_D63G,N_R203M,NSP12_G671S,NSP3_T1306I,NS3_S26L,Spike_P681R,Spike_R158del,Spike_P1162S,NSP3_P1228L,NSP3_L1244F,NS7a_V82A,NSP3_A488S,Spike_F157del,NSP4_T492I,NSP14_A394V,Spike_T19R,NS7a_T120I,N_D377Y,M_I82T,Spike_D950N,NS7b_T40I,NSP13_P77L,Spike_E156G,NSP13_L297F,M_T30I,NSP3_P1469S,Spike_T478K,NSP6_T77A,NS3_E239Q,NSP12_P323L,Spike_D614G,NSP4_V167L,Spike_L452R)
hCoV-19/USA/WI-MHDL-2022010116/2021	EPI_ISL_8594428	2021-12-07	North America / USA / Wisconsin / Milwaukee County	Human	Original	Nanopore Clear Dx	BIP-WV6	AY.25	21J	Delta	GK	(N_G215C,N_D63G,N_R203M,NSP12_G671S,NSP2_L410F,NS3_S26L,NSP3_N444Y,Spike_P681R,Spike_R158del,NSP3_P1228L,NS7a_V82A,NSP3_A488S,Spike_F157del,NSP4_T492I,Spike_A688V,NSP14_A394V,Spike_T19R,NS7a_T120I,NSP3_S211G,N_D377Y,M_I82T,NSP14_T5I,Spike_D950N,N_M101I,NS7b_T40I,NSP12_A46S,NSP13_P77L,Spike_E156G,NSP3_P1469S,Spike_T478K,NSP6_T77A,NS3_E239Q,NSP9_R39K,NSP12_P323L,Spike_D614G,NSP4_V167L,Spike_L452R)
hCoV-19/USA/WI-MHDL-2021120311/2021	EPI_ISL_7828371	2021-12-08	North America / USA / Wisconsin / Milwaukee County	Human	Original	Illumina MiSeq	DRAGEN COVID lineage v3.5.5	AY.100	21J	Delta	GK	(N_G215C,NSP4_D70N,Spike_T95I,N_D63G,N_R203M,NSP12_G671S,Spike_G142D,NS3_S26L,NSP13_A296S,Spike_P681R,Spike_R158del,NSP3_P1228L,NS7a_V82A,NSP3_A488S,Spike_F157del,NSP4_T492I,NSP14_A394V,Spike_T19R,NS7a_T120I,N_D377Y,M_I82T,NSP6_Q208H,Spike_D950N,NS7b_T40I,NSP13_P77L,NSP3_E1270G,Spike_E156G,NSP3_E493A,NSP3_P1469S,NS8_Y31F,Spike_T478K,NSP6_T77A,NSP3_P109S,NSP15_V66L,NSP12_P323L,Spike_D614G,NSP4_V16…
hCoV-19/USA/WI-MHDL-2021120370/2021	EPI_ISL_7744420	2021-12-08	North America / USA / Wisconsin / Milwaukee County	Human	Original	Nanopore Clear Dx	BIP-WV6	AY.39.1	21J	Delta	GK	(N_G215C,N_D63G,N_R203M,NSP12_G671S,NSP16_Q238H,Spike_D1127G,Spike_G219S,NS3_S26L,Spike_P681R,Spike_R158del,NSP3_P1228L,NSP12_D358A,NS7a_V82A,NSP3_A488S,Spike_F157del,NSP4_T492I,NSP14_A394V,Spike_T19R,NS7a_T120I,NSP9_P57S,N_D377Y,NSP15_V127F,M_I82T,Spike_D950N,NS7b_T40I,NSP13_P77L,M_L34F,Spike_E156G,NSP3_P1469S,Spike_T478K,NS7a_V71I,NSP6_T77A,NSP12_P323L,NSP15_V84L,Spike_D614G,NSP4_V167L,Spike_L4…
hCoV-19/USA/WI-MHDL-2021120373/2021	EPI_ISL_7777469	2021-12-08	North America / USA / Wisconsin / Milwaukee County	Human	Original	Nanopore Clear Dx	BIP-WV6	AY.103	21J	Delta	GK	(N_G215C,N_D63G,N_R203M,NSP12_G671S,NSP13_I334V,NSP1_M85V,NS3_S26L,Spike_K182I,NSP8_P178H,Spike_P681R,Spike_R158del,NSP3_P1228L,NS7a_V82A,NSP3_A488S,Spike_F157del,NSP4_T492I,NSP14_A394V,Spike_T19R,NS7a_T120I,N_D377Y,M_I82T,Spike_D950N,NS7b_T40I,NSP13_P77L,Spike_E156G,NSP3_P1469S,Spike_T478K,NSP6_T77A,NSP12_P323L,Spike_D614G,NSP4_V167L,Spike_L452R)
hCoV-19/USA/WI-MHDL-2021120374/2021	EPI_ISL_7777470	2021-12-08	North America / USA / Wisconsin / Milwaukee County	Human	Original	Nanopore Clear Dx	BIP-WV6	AY.103	21J	Delta	GK	(N_G215C,N_D63G,N_R203M,NSP12_G671S,NSP13_I334V,NSP1_M85V,NS3_S26L,Spike_K182I,NSP8_P178H,Spike_P681R,Spike_R158del,NSP3_P1228L,NS7a_V82A,NSP3_A488S,Spike_F157del,NSP4_T492I,NSP14_A394V,Spike_T19R,NS7a_T120I,N_D377Y,M_I82T,Spike_D950N,NS7b_T40I,NSP13_P77L,Spike_E156G,NSP3_P1469S,Spike_T478K,NSP6_T77A,NSP12_P323L,Spike_D614G,NSP4_V167L,Spike_L452R)
hCoV-19/USA/WI-MHDL-2021120482/2021	EPI_ISL_8185110	2021-12-08	North America / USA / Wisconsin / Milwaukee County	Human	Original	Nanopore Clear Dx	BIP-WV6	AY.44	21J	Delta	GK	(N_G215C,NS8_L60F,N_D63G,N_R203M,NSP12_G671S,NS3_S26L,Spike_P681R,Spike_R158del,NSP3_P1228L,NS7a_V82A,NSP3_A488S,Spike_F157del,NSP4_T492I,NSP14_A394V,Spike_T19R,NS7a_T120I,NSP12_F192V,N_D377Y,NSP13_H164Y,M_I82T,Spike_D950N,NS7b_T40I,NSP3_A1736V,NSP13_P77L,Spike_E156G,NSP3_H1307Y,NSP3_P1469S,Spike_T478K,NSP6_T77A,NSP12_P323L,Spike_D614G,NSP4_V167L,Spike_L452R)
hCoV-19/USA/WI-MHDL-2021120490/2021	EPI_ISL_8185117	2021-12-08	North America / USA / Wisconsin / Milwaukee County	Human	Original	Nanopore Clear Dx	BIP-WV6	AY.103	21J	Delta	GK	(N_G215C,N_D63G,N_A208S,N_R203M,NSP12_G671S,NSP13_I334V,NS3_P104S,NS3_S26L,Spike_P681R,Spike_R158del,NSP3_P1228L,NS7a_V82A,NSP3_A488S,Spike_F157del,NSP4_T492I,Spike_Q677H,NSP14_A394V,Spike_T19R,NS7a_T120I,N_D377Y,M_I82T,Spike_D950N,NS7b_T40I,NSP13_P77L,Spike_E156G,NSP3_P1469S,Spike_T478K,NSP6_T77A,NSP12_P323L,Spike_D614G,NSP4_V167L,Spike_L452R)
hCoV-19/USA/WI-MHDL-2021120515/2021	EPI_ISL_8207638	2021-12-08	North America / USA / Wisconsin / Milwaukee County	Human	Original	Nanopore Clear Dx	BIP-WV6	AY.113	21J	Delta	GK	(N_G215C,N_D63G,N_R203M,NSP12_G671S,NSP12_P264S,NS8_V33F,NS3_S26L,NSP15_D91G,Spike_P681R,Spike_R158del,NSP3_P1228L,NSP4_T204I,NS7a_V82A,NSP3_A488S,Spike_F157del,NSP4_T492I,NSP14_H95Y,NSP14_A394V,Spike_T19R,NS7a_T120I,NS7a_L12F,N_D377Y,M_I82T,NSP2_E460D,Spike_D950N,NS7b_T40I,NSP13_P77L,Spike_E156G,NSP3_P1469S,Spike_T478K,NSP6_T77A,NSP15_N82S,NSP12_P323L,NSP5_K90R,Spike_D614G,NSP4_V167L,Spike_L452R)
hCoV-19/USA/WI-MHDL-2021120516/2021	EPI_ISL_8207639	2021-12-08	North America / USA / Wisconsin / Milwaukee County	Human	Original	Nanopore Clear Dx	BIP-WV6	AY.103	21J	Delta	GK	(N_G215C,N_D63G,N_R203M,NSP12_G671S,NSP13_I334V,NSP12_E744D,NS3_S26L,Spike_P681R,Spike_R158del,NS8_C25Y,NSP3_P1228L,NS7a_V82A,NSP3_A488S,NSP4_R186H,Spike_F157del,NSP4_T492I,NSP14_A394V,Spike_T19R,NS7a_T120I,NSP15_G150V,N_D377Y,M_I82T,Spike_D950N,NS7b_T40I,NSP13_P77L,Spike_E156G,NSP3_P1469S,Spike_T478K,NSP6_T77A,NSP12_P323L,Spike_D614G,NSP4_V167L,Spike_L452R)
hCoV-19/USA/WI-MHDL-2021120517/2021	EPI_ISL_8207640	2021-12-08	North America / USA / Wisconsin / Milwaukee County	Human	Original	Nanopore Clear Dx	BIP-WV6	AY.103	21J	Delta	GK	(N_G215C,N_D63G,N_R203M,NSP12_G671S,NSP13_I334V,NSP12_A185V,NS3_S26L,Spike_P681R,Spike_R158del,NSP3_P1228L,NS7a_V82A,NSP3_A488S,Spike_F157del,NSP4_T492I,NSP14_A394V,NS7a_T120I,N_D377Y,M_I82T,Spike_D950N,NSP15_D91Y,NS7b_T40I,NSP13_P77L,Spike_E156G,NSP3_R407I,NSP3_T678I,NSP3_P1469S,Spike_T478K,NSP6_T77A,NSP12_P323L,Spike_D614G,NSP4_V167L,Spike_L452R)
hCoV-19/USA/WI-MHDL-2021120518/2021	EPI_ISL_8207641	2021-12-08	North America / USA / Wisconsin / Milwaukee County	Human	Original	Nanopore Clear Dx	BIP-WV6	AY.117	21J	Delta	GK	(N_G215C,N_D63G,N_R203M,NSP12_G671S,NSP13_Q518H,NSP3_D110Y,NS3_S26L,Spike_P681R,Spike_R158del,NSP3_I335V,NSP3_P1228L,NS7a_V82A,NSP3_A488S,Spike_F157del,NSP4_T492I,NSP13_T214I,NSP14_A394V,Spike_T19R,NS7a_T120I,N_D377Y,M_I82T,Spike_D950N,NS7b_T40I,NSP13_P77L,Spike_E156G,Spike_T604I,NSP3_P1469S,Spike_A348S,Spike_T478K,NSP2_W466L,NSP2_K335Q,NSP6_T77A,NSP12_P323L,Spike_D614G,NSP4_V167L,Spike_L452R,NSP…
hCoV-19/USA/WI-MHDL-2021120519/2021	EPI_ISL_8207642	2021-12-08	North America / USA / Wisconsin / Milwaukee County	Human	Original	Nanopore Clear Dx	BIP-WV6	AY.100	21J	Delta	GK	(N_G215C,N_D63G,N_R203M,NSP12_G671S,NS3_S26L,NSP13_A296S,Spike_P681R,Spike_R158del,Spike_V227I,NSP3_P1228L,N_G120R,NS7a_V82A,NSP3_A488S,Spike_F157del,NSP4_T492I,NSP14_A394V,Spike_T19R,NS7a_T120I,N_D377Y,M_I82T,NS3_V50I,Spike_D950N,NS7b_T40I,NSP3_L1685F,NSP13_P77L,NSP15_P205L,Spike_E156G,NSP3_P1469S,NS8_Y31F,Spike_T478K,NSP6_T77A,NSP12_P323L,Spike_D614G,NSP4_V167L,Spike_L452R)
hCoV-19/USA/WI-MHDL-2021120520/2021	EPI_ISL_8207643	2021-12-08	North America / USA / Wisconsin / Milwaukee County	Human	Original	Nanopore Clear Dx	BIP-WV6	AY.103	21J	Delta	GK	(N_G215C,N_D63G,N_R203M,NSP12_G671S,NSP13_I334V,NSP12_E744D,NS3_S26L,Spike_P681R,Spike_R158del,NS8_C25Y,NSP3_P1228L,NS7a_V82A,NSP3_A488S,NSP4_R186H,Spike_F157del,NSP4_T492I,NSP14_A394V,Spike_T19R,NS7a_T120I,NSP15_G150V,N_D377Y,M_I82T,Spike_D950N,NS7b_T40I,NSP13_P77L,Spike_E156G,NSP3_P1469S,Spike_T478K,NSP6_T77A,NSP12_P323L,Spike_D614G,NSP4_V167L,Spike_L452R,NSP3_P985S)
hCoV-19/USA/WI-MHDL-2022010164/2021	EPI_ISL_8565361	2021-12-09	North America / USA / Wisconsin / Milwaukee County	Human	Original	Illumina MiSeq	DRAGEN COVID lineage v3.5.5	AY.25	21J	Delta	GK	(N_G215C,Spike_T95I,N_D63G,N_R203M,NSP12_G671S,Spike_G142D,NSP2_L410F,NS3_S26L,NSP3_N444Y,Spike_P681R,Spike_R158del,NSP3_P1228L,NS7a_V82A,NSP3_A488S,Spike_F157del,NSP4_T492I,NSP14_A394V,Spike_T19R,NS7a_T120I,NSP3_S211G,NSP2_A385V,N_D377Y,M_I82T,NSP14_T5I,Spike_D950N,N_M101I,NS7b_T40I,NSP12_A46S,NSP13_P77L,Spike_E156G,NSP3_P1469S,Spike_T478K,NSP6_T77A,NS3_E239Q,NSP9_R39K,NSP12_P323L,Spike_D614G,NS…
hCoV-19/USA/WI-MHDL-2022010165/2021	EPI_ISL_8565362	2021-12-09	North America / USA / Wisconsin / Milwaukee County	Human	Original	Illumina MiSeq	DRAGEN COVID lineage v3.5.5	AY.44	21J	Delta	GK	(Spike_H69del,N_G215C,NS8_L60F,N_D63G,N_R203M,NSP12_G671S,Spike_G142D,NS3_S26L,Spike_P681R,Spike_R158del,NS7a_V82A,NSP3_A488S,Spike_F157del,NSP4_T492I,NSP14_A394V,Spike_T19R,NS7a_T120I,NSP12_F192V,N_D377Y,NSP13_H164Y,M_I82T,Spike_D950N,NS7b_T40I,NSP3_A1736V,NSP13_P77L,Spike_E156G,NSP3_H1307Y,NSP3_P1469S,Spike_T478K,Spike_V70del,NSP6_T77A,NSP12_P323L,Spike_D614G,NSP4_V167L,Spike_L452R)
hCoV-19/USA/WI-MHDL-2021120367/2021	EPI_ISL_7744417	2021-12-09	North America / USA / Wisconsin / Milwaukee County	Human	Original	Nanopore Clear Dx	BIP-WV6	AY.3	21J	Delta	GK	(N_D63G,NSP5_P132L,NSP12_G671S,NSP6_I162V,NS3_S26L,Spike_P681R,Spike_R158del,NSP3_P1228L,NS7a_V82A,NSP3_A488S,Spike_F157del,NSP4_T492I,NSP14_G37C,NSP14_A394V,Spike_T19R,NS7a_T120I,N_D377Y,M_I82T,Spike_D950N,NS7b_T40I,NSP13_P77L,Spike_E156G,NSP3_P1469S,NSP6_T77A,NSP12_P323L,Spike_D614G,NSP2_L97V,Spike_F338L,NSP4_V167L)
hCoV-19/USA/WI-MHDL-2021120369/2021	EPI_ISL_7744419	2021-12-09	North America / USA / Wisconsin / Milwaukee County	Human	Original	Nanopore Clear Dx	BIP-WV6	AY.103	21J	Delta	GK	(N_G215C,N_D63G,N_R203M,NSP12_G671S,NSP13_I334V,NS3_S26L,NSP4_A316V,Spike_P681R,Spike_R158del,NSP3_P1228L,NS3_M125V,NSP2_E478D,NS7a_V82A,NSP3_A488S,Spike_F157del,NSP4_T492I,NSP14_A394V,Spike_T19R,NS7a_T120I,Spike_L18F,N_D377Y,M_I82T,Spike_D950N,NS7b_T40I,NSP13_P77L,Spike_E156G,NSP3_P1469S,Spike_T478K,NSP6_T77A,NSP12_P323L,Spike_D614G,NSP4_V167L,Spike_L452R)
hCoV-19/USA/WI-MHDL-2021120375/2021	EPI_ISL_7744422	2021-12-09	North America / USA / Wisconsin / Milwaukee County	Human	Original	Nanopore Clear Dx	BIP-WV6	AY.103	21J	Delta	GK	(N_G215C,N_D63G,N_R203M,NSP12_G671S,NSP13_I334V,Spike_R646H,NS3_S26L,Spike_P681R,Spike_R158del,NSP3_P1228L,NSP3_A1819V,NS7a_V82A,NSP3_A488S,Spike_F157del,NSP4_T492I,NSP14_A394V,Spike_T19R,NS7a_T120I,N_D377Y,M_I82T,NSP6_Q208H,Spike_D950N,NS7b_T40I,NSP13_P77L,Spike_E156G,NSP3_P1469S,Spike_T478K,NSP6_T77A,NSP12_P323L,Spike_D614G,NSP4_V167L,Spike_L452R)
hCoV-19/USA/WI-MHDL-2021120377/2021	EPI_ISL_7744424	2021-12-09	North America / USA / Wisconsin / Milwaukee County	Human	Original	Nanopore Clear Dx	BIP-WV6	BA.1.15	21K	Omicron	GRA	(NSP5_P132H,Spike_H69del,Spike_T95I,Spike_A67V,NSP6_S106del,Spike_N969K,Spike_H655Y,Spike_N856K,N_R203K,Spike_G142D,NSP3_A1892T,Spike_Q954H,Spike_G339D,NS3_L106F,N_P13L,NSP3_L1266I,N_R32del,NSP3_S1265del,NSP14_I42V,Spike_P681H,Spike_Y144del,M_Q19E,N_S33del,NSP4_T492I,NSP6_L105del,Spike_N679K,Spike_N764K,NSP6_G107del,N_E31del,NSP3_K38R,NSP6_I189V,Spike_T547K,Spike_D796Y,N_G204R,N_D343G,Spike_V70de…
hCoV-19/USA/WI-MHDL-2021120381/2021	EPI_ISL_7744428	2021-12-09	North America / USA / Wisconsin / Milwaukee County	Human	Original	Nanopore Clear Dx	BIP-WV6	AY.44	21J	Delta	GK	(N_G215C,N_D63G,N_R203M,NSP12_G671S,NS3_S26L,Spike_P681R,Spike_R158del,NSP3_P1228L,NS7a_V82A,NSP3_A488S,Spike_F157del,NSP4_T492I,NSP14_A394V,Spike_T19R,NS7a_T120I,NSP4_S209F,NSP12_F192V,N_D377Y,NSP3_S126L,M_I82T,Spike_D950N,NSP3_G76D,NS7b_T40I,NSP3_A1736V,NSP13_P77L,NSP5_A129V,Spike_E156G,NSP2_Y189C,NSP3_P1469S,Spike_T478K,NSP6_T77A,NSP12_P323L,Spike_D614G,NSP4_V167L,Spike_L452R)
hCoV-19/USA/WI-MHDL-2021120382/2021	EPI_ISL_7744429	2021-12-09	North America / USA / Wisconsin / Milwaukee County	Human	Original	Nanopore Clear Dx	BIP-WV6	AY.44	21J	Delta	GK	(N_G215C,NS8_L60F,N_D63G,N_R203M,NS3_S165F,NSP12_G671S,NS3_S26L,Spike_P681R,Spike_R158del,Spike_S939F,NSP3_E815D,NS7a_V82A,NSP3_A488S,Spike_F157del,NSP4_T492I,NSP14_A394V,Spike_T19R,NS7a_T120I,NSP12_F192V,N_D377Y,NSP13_H164Y,M_I82T,Spike_D950N,NS7b_T40I,NSP3_P822L,NSP13_P77L,Spike_E156G,NSP12_T870I,Spike_T478K,NSP6_T77A,NSP3_V418F,NSP12_P323L,Spike_D614G,Spike_L452R)
hCoV-19/USA/WI-MHDL-2021120383/2021	EPI_ISL_7744430	2021-12-09	North America / USA / Wisconsin / Milwaukee County	Human	Original	Nanopore Clear Dx	BIP-WV6	AY.3	21J	Delta	GK	(N_G215C,N_D63G,N_R203M,NSP2_G262D,NSP12_G671S,NSP6_I162V,NS3_W131C,NS3_S26L,Spike_P681R,Spike_R158del,NSP3_P1228L,NS8_A65S,NS7a_V82A,NSP3_A488S,Spike_F157del,NSP4_T492I,NSP14_A394V,Spike_T19R,NS7a_T120I,N_D377Y,M_I82T,Spike_D950N,NS7b_T40I,N_S26C,NSP13_P77L,Spike_E156G,NSP3_P1469S,Spike_T478K,NSP6_T77A,NSP12_P323L,Spike_D614G,NSP4_V167L,Spike_L452R)
hCoV-19/USA/WI-MHDL-2021120450/2021	EPI_ISL_7979273	2021-12-09	North America / USA / Wisconsin / Waukesha County	Human	Original	Nanopore Clear Dx	BIP-WV6	BA.1.15	21K	Omicron	GRA	(NSP5_P132H,Spike_H69del,Spike_T95I,Spike_A67V,NSP3_L368F,NSP6_S106del,Spike_N969K,Spike_H655Y,Spike_N856K,N_R203K,Spike_G142D,NSP3_A1892T,Spike_Q954H,Spike_G339D,NS3_L106F,N_P13L,NSP3_L1266I,N_R32del,NSP3_S1265del,NSP14_I42V,Spike_P681H,Spike_Y144del,M_Q19E,N_S33del,NSP4_T492I,NSP6_L105del,Spike_N679K,Spike_N764K,NSP6_G107del,N_E31del,NSP3_K38R,NSP6_I189V,Spike_T547K,Spike_D796Y,N_G204R,N_D343G,…
hCoV-19/USA/WI-MHDL-2021120451/2021	EPI_ISL_7979274	2021-12-09	North America / USA / Wisconsin / Waukesha County	Human	Original	Nanopore Clear Dx	BIP-WV6	BA.1.15	21K	Omicron	GRA	(NSP5_P132H,Spike_H69del,Spike_T95I,Spike_A67V,NSP3_L368F,NSP6_S106del,Spike_N969K,Spike_H655Y,Spike_N856K,N_R203K,Spike_G142D,NSP3_A1892T,Spike_Q954H,Spike_G339D,NS3_L106F,N_P13L,NSP3_L1266I,N_R32del,NSP3_S1265del,NSP14_I42V,Spike_P681H,Spike_Y144del,M_Q19E,N_S33del,NSP4_T492I,NSP6_L105del,Spike_N679K,Spike_N764K,NSP6_G107del,N_E31del,NSP3_K38R,NSP6_I189V,Spike_T547K,Spike_D796Y,N_G204R,N_D343G,…
hCoV-19/USA/WI-MHDL-2021120452/2021	EPI_ISL_7979275	2021-12-09	North America / USA / Wisconsin / Milwaukee County	Human	Original	Nanopore Clear Dx	BIP-WV6	BA.1.15	21K	Omicron	GRA	(NSP5_P132H,Spike_H69del,Spike_T95I,Spike_A67V,NSP6_S106del,Spike_N969K,Spike_H655Y,Spike_N856K,N_R203K,Spike_G142D,NSP3_A1892T,Spike_Q954H,Spike_G339D,NS3_L106F,N_P13L,NSP3_L1266I,N_R32del,NSP3_S1265del,NSP14_I42V,Spike_P681H,Spike_Y144del,M_Q19E,N_S33del,NSP4_T492I,NSP6_L105del,Spike_N679K,Spike_N764K,NSP6_G107del,N_E31del,NSP3_K38R,NSP6_I189V,Spike_T547K,Spike_D796Y,N_G204R,N_D343G,Spike_V70de…
hCoV-19/USA/WI-MHDL-2021120505/2021	EPI_ISL_8207630	2021-12-09	North America / USA / Wisconsin / Milwaukee County	Human	Original	Nanopore Clear Dx	BIP-WV6	AY.20	21J	Delta	GK	(N_G215C,N_D63G,N_R203M,NSP12_G671S,NSP10_T111I,NS3_S26L,Spike_P681R,Spike_R158del,NSP3_P1228L,NS7a_V82A,NSP3_A488S,Spike_F157del,NSP4_T492I,NSP14_A394V,Spike_T19R,NS7a_T120I,N_D377Y,M_I82T,Spike_D950N,NS6_D53Y,NSP13_S74L,NS7b_T40I,NSP13_P77L,Spike_E156G,NS8_S67F,NSP6_T77A,NSP12_P323L,Spike_D614G,Spike_V1104L,NSP4_V167L)
hCoV-19/USA/WI-MHDL-2021120506/2021	EPI_ISL_8207631	2021-12-09	North America / USA / Wisconsin / Milwaukee County	Human	Original	Nanopore Clear Dx	BIP-WV6	AY.103	21J	Delta	GK	(N_G215C,N_D63G,N_R203M,NSP12_G671S,NSP13_I334V,NSP12_A185V,NS3_S26L,Spike_P681R,Spike_R158del,NSP3_P1228L,NS7a_V82A,NSP3_A488S,Spike_F157del,NSP4_T492I,NSP14_A394V,NS7a_T120I,N_D377Y,M_I82T,Spike_D950N,NSP15_D91Y,NS7b_T40I,NSP13_P77L,Spike_E156G,NSP3_R407I,NSP3_T678I,NSP3_P1469S,Spike_T478K,NSP6_T77A,NSP12_P323L,Spike_D614G,NSP4_V167L,Spike_L452R)
hCoV-19/USA/WI-MHDL-2021120507/2021	EPI_ISL_8207632	2021-12-09	North America / USA / Wisconsin / Milwaukee County	Human	Original	Nanopore Clear Dx	BIP-WV6	AY.25	21J	Delta	GK	(N_G215C,N_D63G,NSP12_I539T,N_R203M,NSP12_G671S,NSP4_H313Y,NS3_S26L,NSP3_K384N,Spike_P681R,Spike_R158del,NSP3_P1228L,NS7a_V82A,NSP3_A488S,Spike_F157del,NSP4_T492I,NSP14_A394V,Spike_T19R,NS7a_T120I,N_D377Y,M_I82T,Spike_D950N,NSP5_P96S,NS7b_T40I,NSP13_P77L,Spike_E156G,NSP3_P1469S,Spike_T478K,NSP6_T77A,NS3_E239Q,NSP12_P323L,Spike_D614G,NSP4_V167L,Spike_L452R)
hCoV-19/USA/WI-MHDL-2021120521/2021	EPI_ISL_8207644	2021-12-09	North America / USA / Wisconsin / Milwaukee County	Human	Original	Nanopore Clear Dx	BIP-WV6	AY.44	21J	Delta	GK	(N_G215C,N_D63G,N_R203M,NSP12_G671S,NS3_S26L,NSP2_T429I,NSP4_A457V,Spike_P681R,Spike_R158del,NSP15_A171S,NSP3_P1228L,NS7a_V82A,NSP3_A488S,NSP15_K12N,Spike_F157del,NSP4_T492I,NSP14_A394V,Spike_T19R,NS7a_T120I,NSP12_F192V,N_D377Y,M_I82T,Spike_D950N,NS7b_T40I,NSP13_P77L,Spike_E156G,NSP3_P1469S,Spike_T478K,NSP6_T77A,NSP1_S166G,NSP12_P323L,Spike_D614G,NSP4_V167L,Spike_L452R)
hCoV-19/USA/WI-MHDL-2021120523/2021	EPI_ISL_8207646	2021-12-09	North America / USA / Wisconsin / Milwaukee County	Human	Original	Nanopore Clear Dx	BIP-WV6	AY.103	21J	Delta	GK	(N_G215C,N_D63G,N_R203M,NSP12_G671S,NSP13_I334V,NSP5_S46P,NS3_S26L,Spike_P681R,Spike_R158del,NS8_V62L,NSP3_E81A,NSP3_P1228L,NS7a_V82A,NSP3_A488S,Spike_F157del,NSP4_T492I,NSP14_A394V,Spike_T19R,NS7a_T120I,N_D377Y,M_I82T,Spike_D950N,NSP1_K120N,NS7b_T40I,NSP13_P77L,Spike_E156G,NSP3_P1469S,Spike_T478K,NSP6_T77A,NSP14_S137I,NSP12_P323L,Spike_D614G,NSP4_V167L,Spike_L452R)
hCoV-19/USA/WI-MHDL-2021120524/2021	EPI_ISL_8207647	2021-12-09	North America / USA / Wisconsin / Milwaukee County	Human	Original	Nanopore Clear Dx	BIP-WV6	AY.44	21J	Delta	GK	(N_G215C,N_D63G,N_R203M,NSP12_G671S,NS3_S26L,NSP2_T429I,NSP4_A457V,Spike_P681R,Spike_R158del,NSP15_A171S,NSP3_P1228L,NS7a_V82A,NSP3_A488S,NSP15_K12N,Spike_F157del,NSP4_T492I,NSP14_A394V,Spike_T19R,NS7a_T120I,NSP12_F192V,N_D377Y,M_I82T,Spike_D950N,NS7b_T40I,NSP13_P77L,Spike_E156G,NSP3_P1469S,Spike_T478K,NSP6_T77A,NSP1_S166G,NSP12_P323L,Spike_D614G,NSP4_V167L,Spike_L452R)
hCoV-19/USA/WI-MHDL-2021120526/2021	EPI_ISL_8207649	2021-12-09	North America / USA / Wisconsin / Milwaukee County	Human	Original	Nanopore Clear Dx	BIP-WV6	AY.119.2	21J	Delta	GK	(N_G215C,N_D63G,N_R203M,NSP1_V108F,NSP12_G671S,NS3_S26L,NS8_W45stop,Spike_P681R,Spike_R158del,NSP3_P1228L,NSP3_M768I,Spike_Q675H,NS7a_V82A,NSP3_A488S,Spike_F157del,NSP4_T492I,NSP14_A394V,Spike_T19R,NS7a_T120I,N_D377Y,M_I82T,NSP15_A80V,Spike_D950N,NS7b_T40I,NSP13_P77L,NSP14_A323S,Spike_E156G,NSP3_P1469S,NSP4_A92V,Spike_T478K,NSP6_T77A,NSP12_P323L,Spike_D614G,NSP4_V167L,Spike_L452R,N_T391I)
hCoV-19/USA/WI-MHDL-2021120527/2021	EPI_ISL_8207650	2021-12-09	North America / USA / Wisconsin / Milwaukee County	Human	Original	Nanopore Clear Dx	BIP-WV6	AY.103	21J	Delta	GK	(N_G215C,N_D63G,N_R203M,NSP12_G671S,NSP13_I334V,NSP2_G339S,NS3_S26L,NS3_P240S,Spike_P681R,Spike_R158del,NSP3_Y1444H,NSP3_P1228L,NS7a_V82A,NSP3_A488S,Spike_F157del,NSP4_T492I,NSP14_A394V,Spike_T19R,NS7a_T120I,N_D377Y,M_I82T,Spike_D950N,NS7b_T40I,NSP13_P77L,Spike_E156G,NSP3_P1867T,NSP3_P1469S,Spike_T478K,NSP6_T77A,NSP12_A702S,NSP4_T114I,NSP12_P323L,Spike_D614G,NSP1_D48N,NSP4_V167L,Spike_L452R)
hCoV-19/USA/WI-MHDL-2021120528/2021	EPI_ISL_8207651	2021-12-09	North America / USA / Wisconsin / Milwaukee County	Human	Original	Nanopore Clear Dx	BIP-WV6	AY.26	21I	Delta	GK	(Spike_V1264L,N_D63G,N_R203M,NSP12_G671S,NSP2_K489T,NS6_K48N,NSP6_T181I,NS3_S26L,Spike_P681R,Spike_R158del,M_A2S,NS7a_V82A,Spike_F157del,Spike_T19R,NS7a_T120I,Spike_A222V,N_D377Y,M_I82T,NSP6_V149A,Spike_D950N,NSP3_P822L,NSP13_P77L,Spike_E156G,NSP4_A446V,Spike_T478K,NSP12_P323L,Spike_D614G,Spike_L452R,NSP12_V231I)
hCoV-19/USA/WI-MHDL-2021120529/2021	EPI_ISL_8207652	2021-12-09	North America / USA / Wisconsin / Milwaukee County	Human	Original	Nanopore Clear Dx	BIP-WV6	AY.26	21I	Delta	GK	(Spike_V1264L,N_D63G,N_R203M,NSP12_G671S,NSP2_K489T,NS6_K48N,NSP6_T181I,NS3_S26L,Spike_P681R,Spike_R158del,M_A2S,NS7a_V82A,Spike_F157del,Spike_T19R,NS7a_T120I,Spike_A222V,N_D377Y,M_I82T,NSP6_V149A,Spike_D950N,NSP3_P822L,NSP13_P77L,Spike_E156G,NSP4_A446V,Spike_T478K,NSP12_P323L,Spike_D614G,Spike_L452R,NSP12_V231I)
hCoV-19/USA/WI-MHDL-2021120532/2021	EPI_ISL_8207655	2021-12-09	North America / USA / Wisconsin / Milwaukee County	Human	Original	Nanopore Clear Dx	BIP-WV6	BA.1.20	21K	Omicron	GRA	(NSP5_P132H,Spike_H69del,Spike_T95I,Spike_A67V,NSP6_S106del,Spike_N969K,Spike_H655Y,Spike_N856K,N_P67S,N_R203K,Spike_G142D,NSP3_A1892T,Spike_Q954H,Spike_G339D,N_P13L,NSP3_L1266I,N_R32del,NSP3_S1265del,NSP14_I42V,Spike_P681H,Spike_Y144del,M_Q19E,N_S33del,NSP4_T492I,NSP6_L105del,Spike_N679K,Spike_N764K,NSP6_G107del,N_E31del,NSP3_K38R,NSP6_I189V,Spike_T547K,M_D3G,Spike_D796Y,N_G204R,E_T9I,Spike_V70d…
hCoV-19/USA/WI-MHDL-2022010055/2021	EPI_ISL_8428610	2021-12-09	North America / USA / Wisconsin / Milwaukee County	Human	Original	Nanopore Clear Dx	BIP-WV6	AY.103	21J	Delta	GK	(N_G215C,N_D63G,N_R203M,NSP12_G671S,NSP13_I334V,NS3_S26L,Spike_P681R,Spike_R158del,NSP3_P1228L,NS7a_V82A,NSP3_A488S,Spike_F157del,NSP4_T492I,NSP14_A394V,Spike_T19R,NS7a_T120I,N_D377Y,M_I82T,Spike_D950N,NS7b_T40I,NSP13_P77L,Spike_E156G,NSP3_P1469S,Spike_T478K,NSP6_T77A,NSP12_P323L,Spike_D614G,Spike_L452R,NSP4_V167L)
hCoV-19/USA/WI-MHDL-2022010057/2021	EPI_ISL_8428612	2021-12-09	North America / USA / Wisconsin / Milwaukee County	Human	Original	Nanopore Clear Dx	BIP-WV6	AY.103	21J	Delta	GK	(N_G215C,N_D63G,N_R203M,NSP12_G671S,NSP13_I334V,NSP14_T372I,NS3_S26L,NSP8_P178H,Spike_P681R,Spike_R158del,NSP3_P1228L,NS7a_V82A,NSP3_A488S,Spike_F157del,NSP4_T492I,NSP14_A394V,Spike_T19R,NS7a_T120I,N_D377Y,M_I82T,Spike_D950N,NS7b_T40I,NSP13_P77L,Spike_E156G,NSP3_P1469S,NSP3_K462N,Spike_T478K,NSP6_T77A,NSP12_P323L,Spike_D614G,NSP4_V167L,Spike_L452R,NSP3_L1126S)
hCoV-19/USA/WI-MHDL-2022010059/2021	EPI_ISL_8428614	2021-12-09	North America / USA / Wisconsin / Milwaukee County	Human	Original	Nanopore Clear Dx	BIP-WV6	AY.103	21J	Delta	GK	(N_G215C,N_D63G,N_R203M,NSP12_G671S,NSP13_I334V,NSP12_A185V,NS3_S26L,Spike_P681R,Spike_R158del,NSP3_P1228L,NS7a_V82A,NSP3_A488S,Spike_F157del,NSP4_T492I,NSP14_A394V,Spike_T19R,NS7a_T120I,N_D377Y,M_I82T,NSP2_A127V,Spike_D950N,NSP15_D91Y,NS7b_T40I,NSP13_P77L,Spike_E156G,NSP3_R407I,NSP3_P1469S,Spike_T478K,NSP6_T77A,NSP12_P323L,Spike_D614G,NSP4_V167L,Spike_L452R)
hCoV-19/USA/WI-MHDL-2022010060/2021	EPI_ISL_8428615	2021-12-09	North America / USA / Wisconsin / Milwaukee County	Human	Original	Nanopore Clear Dx	BIP-WV6	AY.103	21J	Delta	GK	(N_G215C,N_D63G,N_R203M,NSP12_G671S,NSP13_I334V,Spike_P1090L,NS3_S26L,Spike_P681R,Spike_R158del,NSP3_P1228L,NSP3_N262I,NS7a_V82A,NSP3_A488S,Spike_F157del,NSP4_T492I,NSP2_P96S,NSP14_A394V,Spike_T19R,NS7a_T120I,N_D377Y,M_I82T,Spike_D950N,NS7b_T40I,NSP13_P77L,NSP7_V58I,Spike_E156G,NSP3_P1469S,Spike_T478K,NS7a_P45L,NSP6_T77A,NSP12_P323L,Spike_D614G,NSP4_V167L,Spike_L452R)
hCoV-19/USA/WI-MHDL-2022010163/2021	EPI_ISL_8565360	2021-12-10	North America / USA / Wisconsin / Milwaukee County	Human	Original	Illumina MiSeq	DRAGEN COVID lineage v3.5.5	AY.103	21J	Delta	GK	(N_G215C,N_R203M,NSP12_G671S,NSP13_I334V,Spike_G142D,NS8_H40Q,NSP3_P1228L,NS7a_V82A,NSP4_T492I,NS7a_S98del,Spike_T19R,NS7a_T120I,M_I82T,NS7a_V104del,Spike_D950N,NS7b_T40I,NSP3_P1469S,Spike_T478K,NSP6_T77A,NS7a_Y97del,NS7a_F101del,NS7a_F109del,NSP3_D163A,N_D63G,NS7a_I110stop,NS3_S26L,Spike_P681R,Spike_R158del,NS8_C25Y,NSP9_T109I,NS7a_V108del,NS7a_I100del,NS7a_A106del,NSP3_A488S,Spike_F157del,NSP14…
hCoV-19/USA/WI-MHDL-2022010166/2021	EPI_ISL_8565363	2021-12-10	North America / USA / Wisconsin / Milwaukee County	Human	Original	Illumina MiSeq	DRAGEN COVID lineage v3.5.5	AY.3	21J	Delta	GK	(N_G215C,N_D63G,N_R203M,NSP12_G671S,NSP6_I162V,Spike_G142D,NS3_S26L,Spike_P681R,Spike_R158del,NS7a_V82A,NSP1_G94D,NSP3_A488S,Spike_F157del,NSP4_T492I,NSP14_A394V,Spike_T19R,NS7a_T120I,N_D377Y,M_I82T,Spike_D950N,NS3_A54V,NS7b_T40I,NSP13_P77L,Spike_E156G,NSP3_P1469S,Spike_T478K,NSP6_T77A,NSP12_P323L,Spike_D614G,NSP4_V167L,Spike_L452R)
hCoV-19/USA/WI-MHDL-2022010168/2021	EPI_ISL_8565364	2021-12-10	North America / USA / Wisconsin / Milwaukee County	Human	Original	Illumina MiSeq	DRAGEN COVID lineage v3.5.5	AY.103	21J	Delta	GK	(N_G215C,N_D63G,N_R203M,NSP12_G671S,NSP13_I334V,Spike_G142D,NSP14_T372I,NS3_S26L,NSP8_P178H,Spike_P681R,Spike_R158del,NSP3_P1228L,NS7a_V82A,NSP3_A488S,Spike_F157del,NSP4_T492I,NSP14_A394V,Spike_T19R,NS7a_T120I,N_D377Y,M_I82T,Spike_D950N,Spike_E180K,NS7b_T40I,NSP13_P77L,Spike_E156G,NSP3_P1469S,NSP3_K462N,Spike_T478K,NSP6_T77A,NSP12_P323L,Spike_D614G,NSP4_V167L,Spike_L452R,NSP3_L1126S)
hCoV-19/USA/WI-MHDL-2021120331/2021	EPI_ISL_7698296	2021-12-10	North America / USA / Wisconsin / Milwaukee County	Human	Original	Nanopore Clear Dx	BIP-WV6	BA.1.15	21K	Omicron	GRA	(NSP5_P132H,Spike_H69del,Spike_T95I,Spike_A67V,NSP6_S106del,Spike_N969K,Spike_H655Y,Spike_N856K,N_R203K,Spike_G142D,NSP3_A1892T,Spike_Q954H,Spike_G339D,NS3_L106F,N_P13L,NSP3_L1266I,N_R32del,NSP3_S1265del,NSP14_I42V,Spike_P681H,Spike_Y144del,M_Q19E,N_S33del,NSP4_T492I,NSP6_L105del,Spike_N679K,Spike_N764K,NSP6_G107del,N_E31del,NSP3_K38R,NSP6_I189V,Spike_T547K,Spike_D796Y,N_G204R,N_D343G,Spike_V70de…
hCoV-19/USA/WI-MHDL-2021120332/2021	EPI_ISL_7698299	2021-12-10	North America / USA / Wisconsin / Milwaukee County	Human	Original	Nanopore Clear Dx	BIP-WV6	BA.1.15	21K	Omicron	GRA	(NSP5_P132H,Spike_H69del,Spike_T95I,Spike_A67V,NSP6_S106del,Spike_N969K,Spike_H655Y,Spike_N856K,N_R203K,Spike_G142D,NSP3_A1892T,Spike_Q954H,NS3_L106F,N_P13L,NSP3_L1266I,N_R32del,NSP3_S1265del,NSP14_I42V,Spike_P681H,Spike_Y144del,M_Q19E,N_S33del,NSP4_T492I,NSP6_L105del,Spike_N679K,Spike_N764K,NSP6_G107del,N_E31del,NSP6_I189V,Spike_T547K,Spike_D796Y,N_G204R,N_D343G,Spike_V70del,Spike_L981F,Spike_V1…
hCoV-19/USA/WI-MHDL-2021120351/2021	EPI_ISL_7698329	2021-12-10	North America / USA / Wisconsin / Milwaukee County	Human	Original	Nanopore Clear Dx	BIP-WV6	AY.122	21J	Delta	GK	(N_G215C,N_D63G,N_R203M,NSP12_G671S,Spike_G142D,NS3_S26L,Spike_P681R,NS3_L108F,Spike_R158del,NSP3_P1228L,NS7a_V82A,NSP3_A488S,Spike_F157del,NSP4_T492I,NSP14_A394V,Spike_T19R,NS7a_T120I,NSP2_K81N,N_D377Y,M_I82T,Spike_D950N,NS7b_T40I,NSP13_P77L,Spike_E156G,NSP3_P1469S,Spike_T478K,NS7a_P45L,NSP6_T77A,NSP2_I479L,NSP12_P323L,Spike_D614G,NSP4_V167L,Spike_L452R)
hCoV-19/USA/WI-MHDL-2021120352/2021	EPI_ISL_7698331	2021-12-10	North America / USA / Wisconsin / Racine County	Human	Original	Nanopore Clear Dx	BIP-WV6	AY.44	21J	Delta	GK	(N_G215C,NS8_L60F,N_D63G,N_R203M,NSP12_G671S,Spike_G142D,NS3_S26L,Spike_P681R,NSP12_F77L,Spike_R158del,NSP3_P1228L,NS7a_V82A,NSP3_A488S,Spike_F157del,NSP4_T492I,Spike_T19R,NSP14_A394V,NS7a_T120I,NSP12_F192V,N_D377Y,NSP13_H164Y,M_I82T,Spike_D950N,NS7b_T40I,NSP3_A1736V,NSP13_P77L,NSP13_S236I,NSP3_I1268V,Spike_E156G,NSP3_H1307Y,NSP14_A307T,NSP3_P1469S,Spike_T478K,NSP6_T77A,NSP12_P323L,Spike_D614G,NS…
hCoV-19/USA/WI-MHDL-2021120353/2021	EPI_ISL_7698333	2021-12-10	North America / USA / Wisconsin / Milwaukee County	Human	Original	Nanopore Clear Dx	BIP-WV6	BA.1.15	21K	Omicron	GRA	(NSP5_P132H,Spike_H69del,Spike_T95I,Spike_A67V,NSP6_S106del,Spike_N969K,Spike_H655Y,Spike_N856K,N_R203K,Spike_G142D,NSP3_A1892T,Spike_Q954H,Spike_G339D,NS3_L106F,N_P13L,NSP3_L1266I,N_R32del,NSP3_S1265del,NSP14_I42V,Spike_P681H,Spike_Y144del,M_Q19E,N_S33del,NSP4_T492I,NSP6_L105del,Spike_N679K,Spike_N764K,NSP6_G107del,N_E31del,NSP6_I189V,Spike_T547K,Spike_D796Y,N_G204R,N_D343G,Spike_V70del,Spike_L9…
hCoV-19/USA/WI-MHDL-2021120376/2021	EPI_ISL_7744423	2021-12-10	North America / USA / Wisconsin / Milwaukee County	Human	Original	Nanopore Clear Dx	BIP-WV6	BA.1.15	21K	Omicron	GRA	(NSP5_P132H,Spike_H69del,Spike_T95I,Spike_A67V,NSP6_S106del,Spike_N969K,Spike_H655Y,Spike_N856K,N_R203K,Spike_G142D,NSP3_A1892T,Spike_Q954H,Spike_G339D,NS3_L106F,N_P13L,NSP3_L1266I,N_R32del,NSP3_S1265del,NSP14_I42V,Spike_P681H,Spike_Y144del,M_Q19E,N_S33del,NSP4_T492I,NSP6_L105del,Spike_N679K,Spike_N764K,NSP6_G107del,N_E31del,NSP3_K38R,NSP6_I189V,Spike_T547K,Spike_D796Y,N_G204R,N_D343G,Spike_V70de…
hCoV-19/USA/WI-MHDL-2021120379/2021	EPI_ISL_7744426	2021-12-10	North America / USA / Wisconsin / Milwaukee County	Human	Original	Nanopore Clear Dx	BIP-WV6	BA.1.15	21K	Omicron	GRA	(NSP5_P132H,Spike_H69del,Spike_T95I,Spike_A67V,NSP6_S106del,Spike_N969K,Spike_H655Y,Spike_N856K,N_R203K,Spike_G142D,NSP3_A1892T,Spike_Q954H,Spike_G339D,NS3_L106F,N_P13L,NSP3_L1266I,N_R32del,NSP3_S1265del,NSP14_I42V,Spike_P681H,Spike_Y144del,M_Q19E,N_S33del,NSP4_T492I,NSP6_L105del,Spike_N679K,Spike_N764K,NSP6_G107del,N_E31del,NSP3_K38R,NSP6_I189V,Spike_T547K,Spike_D796Y,N_G204R,N_D343G,Spike_V70de…
hCoV-19/USA/WI-MHDL-2021120380/2021	EPI_ISL_7744427	2021-12-10	North America / USA / Wisconsin / Milwaukee County	Human	Original	Nanopore Clear Dx	BIP-WV6	AY.103	21J	Delta	GK	(N_G215C,NSP2_T160I,N_D63G,N_R203M,NSP12_G671S,NSP13_I334V,NS3_S26L,Spike_P681R,Spike_R158del,NSP3_P1228L,NS7a_V82A,NSP3_A488S,Spike_F157del,NSP4_T492I,NSP14_A394V,Spike_T19R,NS7a_T120I,N_D377Y,M_I82T,Spike_D950N,NS7b_T40I,NSP13_P77L,Spike_E156G,NSP3_P1469S,NSP6_T77A,NSP12_P323L,Spike_D614G,Spike_P272S,NSP4_V167L)
hCoV-19/USA/WI-MHDL-2021120455/2021	EPI_ISL_7979277	2021-12-10	North America / USA / Wisconsin / Waukesha County	Human	Original	Nanopore Clear Dx	BIP-WV6	BA.1.17	21K	Omicron	GRA	(NSP5_P132H,Spike_H69del,Spike_T95I,Spike_A67V,NSP6_S106del,Spike_N969K,Spike_H655Y,Spike_N856K,N_R203K,Spike_G142D,NSP3_A1892T,Spike_Q954H,Spike_G339D,N_P13L,NSP3_L1266I,N_R32del,NSP3_S1265del,NSP14_I42V,Spike_P681H,Spike_Y144del,M_Q19E,N_S33del,NSP4_T492I,NSP6_L105del,Spike_N679K,Spike_N764K,NSP6_G107del,N_E31del,NSP3_K38R,NSP6_I189V,Spike_T547K,Spike_D796Y,N_G204R,Spike_V70del,Spike_L981F,Spik…
hCoV-19/USA/WI-MHDL-2021120456/2021	EPI_ISL_7979278	2021-12-10	North America / USA / Wisconsin / Milwaukee County	Human	Original	Nanopore Clear Dx	BIP-WV6	BA.1.15	21K	Omicron	GRA	(NSP5_P132H,Spike_H69del,Spike_T95I,Spike_A67V,NSP6_S106del,Spike_N969K,Spike_H655Y,Spike_N856K,N_R203K,Spike_G142D,NSP3_A1892T,Spike_Q954H,Spike_G339D,NS3_L106F,N_P13L,NSP3_L1266I,N_R32del,NSP3_S1265del,NSP9_T109I,NSP14_I42V,Spike_P681H,Spike_Y144del,M_Q19E,N_S33del,NSP4_T492I,NSP6_L105del,Spike_N679K,Spike_N764K,NSP6_G107del,N_E31del,NSP3_K38R,NSP6_I189V,Spike_T547K,Spike_D796Y,N_G204R,N_D343G,…
hCoV-19/USA/WI-MHDL-2021120457/2021	EPI_ISL_7979279	2021-12-10	North America / USA / Wisconsin / Milwaukee County	Human	Original	Nanopore Clear Dx	BIP-WV6	BA.1.17	21K	Omicron	GRA	(NSP5_P132H,Spike_H69del,Spike_T95I,Spike_A67V,NSP6_S106del,Spike_N969K,Spike_H655Y,Spike_N856K,N_R203K,Spike_G142D,NSP3_A1892T,Spike_Q954H,N_P13L,NSP3_L1266I,N_R32del,NSP3_S1265del,NSP14_I42V,Spike_P681H,Spike_Y144del,M_Q19E,N_S33del,NSP4_T492I,NSP6_L105del,Spike_N679K,Spike_N764K,NSP6_G107del,N_E31del,NSP3_K38R,NSP6_I189V,Spike_T547K,Spike_D796Y,N_G204R,Spike_V70del,Spike_L981F,Spike_V143del,M_…
hCoV-19/USA/WI-MHDL-2021120458/2021	EPI_ISL_7979280	2021-12-10	North America / USA / Wisconsin / Milwaukee County	Human	Original	Nanopore Clear Dx	BIP-WV6	AY.44	21J	Delta	GK	(N_G215C,NS8_L60F,N_D63G,N_R203M,NSP12_G671S,NS3_S26L,Spike_P681R,Spike_R158del,NSP3_P1228L,NS7a_V82A,NSP3_A488S,Spike_F157del,NSP4_T492I,NSP14_A394V,Spike_T19R,NS7a_T120I,NSP12_F192V,N_D377Y,NSP13_H164Y,M_I82T,Spike_D950N,NS7b_T40I,NSP3_A1736V,NSP13_P77L,Spike_E156G,NSP3_H1307Y,NSP3_P1469S,Spike_T478K,NSP6_T77A,NSP12_P323L,Spike_D614G,NSP4_V167L,Spike_L452R)
hCoV-19/USA/WI-MHDL-2021120504/2021	EPI_ISL_8207629	2021-12-10	North America / USA / Wisconsin / Milwaukee County	Human	Original	Nanopore Clear Dx	BIP-WV6	AY.103	21J	Delta	GK	(N_G215C,N_D63G,N_R203M,NSP12_G671S,NSP13_I334V,NSP2_G339S,NS3_S26L,NS3_P240S,Spike_P681R,Spike_R158del,NSP3_Y1444H,NSP3_P1228L,NS7a_V82A,NSP3_A488S,Spike_F157del,NSP4_T492I,NSP14_A394V,Spike_T19R,NS7a_T120I,N_D377Y,M_I82T,Spike_D950N,NS7b_T40I,NSP13_P77L,Spike_E156G,NSP3_P1469S,Spike_T478K,NSP12_A702S,NSP6_T77A,NSP4_T114I,NSP12_P323L,Spike_D614G,NSP1_D48N,NSP4_V167L,Spike_L452R)
hCoV-19/USA/WI-MHDL-2021120522/2021	EPI_ISL_8207645	2021-12-10	North America / USA / Wisconsin / Milwaukee County	Human	Original	Nanopore Clear Dx	BIP-WV6	AY.103	21J	Delta	GK	(N_G215C,N_D63G,N_R203M,NSP12_G671S,NSP13_I334V,NS3_S26L,Spike_P681R,Spike_R158del,NSP3_P1228L,NS7a_V82A,NS8_R115C,NSP3_A488S,Spike_F157del,NSP4_T492I,NSP14_A394V,Spike_T19R,NS7a_T120I,Spike_Q613H,Spike_P812L,N_D377Y,M_I82T,Spike_D950N,NS7b_T40I,NSP13_P77L,Spike_E156G,NSP3_P1469S,Spike_T478K,NSP6_T77A,NSP12_P323L,Spike_D614G,NSP4_V167L,Spike_L452R)
hCoV-19/USA/WI-MHDL-2021120525/2021	EPI_ISL_8207648	2021-12-10	North America / USA / Wisconsin / Milwaukee County	Human	Original	Nanopore Clear Dx	BIP-WV6	AY.25	21J	Delta	GK	(N_G215C,N_D63G,N_R203M,NSP12_G671S,NS3_S26L,Spike_P681R,Spike_R158del,NSP3_P1228L,Spike_Y170H,NS7a_V82A,NSP3_A488S,Spike_F157del,NSP4_T492I,NSP6_V84I,NSP14_A394V,Spike_T19R,NS7a_T120I,N_D377Y,M_I82T,Spike_D950N,NS7b_T40I,NSP14_Y260C,NSP13_P77L,Spike_E156G,NSP3_P1469S,Spike_T478K,NSP6_T77A,NS3_E239Q,NSP12_P323L,Spike_D614G,Spike_L452R,NSP4_V167L,NSP3_S1843F)
hCoV-19/USA/WI-MHDL-2021120530/2021	EPI_ISL_8207653	2021-12-10	North America / USA / Wisconsin / Milwaukee County	Human	Original	Nanopore Clear Dx	BIP-WV6	AY.119	21J	Delta	GK	(N_G215C,Spike_P809S,N_D63G,N_R203M,NSP12_G671S,NS3_S26L,Spike_P681R,Spike_R158del,NSP3_P1228L,NS3_T9K,NSP9_T24I,NS7a_V82A,NSP3_A488S,Spike_F157del,NSP4_T492I,NSP14_A394V,Spike_T19R,NS7a_T120I,N_D377Y,M_I82T,Spike_D950N,NS7b_T40I,NSP13_D101N,NSP13_P77L,NSP14_A323S,Spike_E156G,NSP2_T573I,NSP3_P1469S,NSP4_A92V,Spike_T478K,NSP6_T77A,NSP12_P323L,Spike_D614G,NSP4_V167L,Spike_L452R)
hCoV-19/USA/WI-MHDL-2021120531/2021	EPI_ISL_8207654	2021-12-10	North America / USA / Wisconsin / Milwaukee County	Human	Original	Nanopore Clear Dx	BIP-WV6	AY.25.1	21J	Delta	GK	(N_G215C,N_D63G,N_R203M,NSP12_G671S,Spike_T859I,NS3_S26L,Spike_P681R,Spike_R158del,NSP3_P1228L,NS7a_V82A,NSP3_A488S,Spike_F157del,NSP4_T492I,NSP14_A394V,Spike_T19R,NS7a_T120I,N_D377Y,M_I82T,NSP2_E587K,NSP6_C197F,Spike_D950N,NS7b_T40I,NSP13_P77L,Spike_E156G,NSP3_P1469S,N_V392M,Spike_T478K,NSP6_T77A,NS3_E239Q,NSP12_P323L,Spike_D614G,NSP4_V167L,Spike_L452R,NSP3_D410G,NSP3_V1786I)
hCoV-19/USA/WI-MHDL-2021120454/2021	EPI_ISL_7979276	2021-12-11	North America / USA / Wisconsin / Waukesha County	Human	Original	Nanopore Clear Dx	BIP-WV6	BA.1.15	21K	Omicron	GRA	(NSP5_P132H,Spike_H69del,Spike_T95I,Spike_A67V,NSP6_S106del,Spike_N969K,Spike_H655Y,Spike_N856K,N_R203K,Spike_G142D,NSP3_A1892T,Spike_Q954H,Spike_G339D,NS3_L106F,N_P13L,NSP3_L1266I,N_R32del,NSP3_S1265del,NSP14_I42V,Spike_P681H,Spike_Y144del,M_Q19E,N_S33del,NSP4_T492I,NSP6_L105del,Spike_N679K,Spike_N764K,NSP6_G107del,N_E31del,NSP3_K38R,NSP6_I189V,Spike_T547K,Spike_D796Y,N_G204R,N_D343G,Spike_V70de…
hCoV-19/USA/WI-MHDL-2022010056/2021	EPI_ISL_8428611	2021-12-11	North America / USA / Wisconsin / Milwaukee County	Human	Original	Nanopore Clear Dx	BIP-WV6	AY.3	21J	Delta	GK	(N_G215C,N_D63G,N_R203M,NSP12_G671S,NSP6_I162V,NS3_S26L,NSP3_M102I,Spike_P681R,Spike_R158del,NSP3_P1228L,NS7a_V82A,NSP3_A488S,Spike_F157del,NSP4_T492I,NSP14_A394V,Spike_T19R,NS7a_T120I,N_D377Y,M_I82T,Spike_D950N,NS7b_T40I,NSP13_P77L,Spike_E156G,NSP3_P1469S,Spike_T478K,NSP6_T77A,NSP12_P323L,Spike_D614G,NSP4_V167L,NSP12_R651C,Spike_L452R)
hCoV-19/USA/WI-MHDL-2022010058/2021	EPI_ISL_8428613	2021-12-11	North America / USA / Wisconsin / Milwaukee County	Human	Original	Nanopore Clear Dx	BIP-WV6	AY.103	21J	Delta	GK	(N_G215C,N_D63G,N_R203M,N_R14C,NSP12_G671S,NSP13_I334V,NS3_W131C,NSP6_T181I,NS3_S26L,Spike_P681R,Spike_R158del,NSP3_P1228L,NSP4_L264F,NS7a_V82A,NSP3_A488S,Spike_F157del,NSP4_T492I,NSP14_A394V,Spike_T19R,NS7a_T120I,N_D377Y,M_I82T,Spike_D950N,NS7b_T40I,NSP13_P77L,Spike_E156G,NSP3_P1469S,Spike_P793S,Spike_T478K,NSP6_T77A,NSP12_P323L,Spike_D614G,NSP3_D785A,NSP4_V167L,Spike_L452R,NSP2_H237R)
hCoV-19/USA/WI-MHDL-2021120406/2021	EPI_ISL_7877069	2021-12-12	North America / USA / Wisconsin / Milwaukee County	Human	Original	Nanopore Clear Dx	BIP-WV6	BA.1.15	21K	Omicron	GRA	(NSP5_P132H,Spike_H69del,Spike_T95I,Spike_A67V,NSP6_S106del,Spike_N969K,Spike_H655Y,Spike_N856K,N_R203K,Spike_G142D,NSP3_A1892T,NSP14_L177F,Spike_Q954H,Spike_G339D,NS3_L106F,N_P13L,NSP3_L1266I,N_R32del,NSP3_S1265del,NSP14_I42V,Spike_P681H,Spike_Y144del,M_Q19E,N_S33del,NSP4_T492I,NSP6_L105del,Spike_N679K,Spike_N764K,NSP6_G107del,N_E31del,NSP6_I189V,Spike_T547K,Spike_D796Y,N_G204R,N_D343G,Spike_V70…
hCoV-19/USA/WI-MHDL-2021120403/2021	EPI_ISL_7877073	2021-12-12	North America / USA / Wisconsin / Milwaukee County	Human	Original	Nanopore Clear Dx	BIP-WV6	BA.1.15	21K	Omicron	GRA	(NSP5_P132H,Spike_H69del,Spike_T95I,Spike_A67V,NSP6_S106del,Spike_N969K,Spike_H655Y,Spike_N856K,N_R203K,Spike_G142D,NSP3_A1892T,Spike_Q954H,Spike_G339D,NS3_L106F,N_P13L,NSP3_L1266I,N_R32del,NSP3_S1265del,NSP14_I42V,Spike_P681H,Spike_Y144del,M_Q19E,N_S33del,NSP4_T492I,NSP6_L105del,Spike_N679K,Spike_N764K,NSP6_G107del,N_E31del,NSP3_K38R,NSP6_I189V,Spike_T547K,M_D3G,Spike_D796Y,N_G204R,N_D343G,E_T9I…
hCoV-19/USA/WI-MHDL-2021120404/2021	EPI_ISL_7877074	2021-12-12	North America / USA / Wisconsin / Milwaukee County	Human	Original	Nanopore Clear Dx	BIP-WV6	BA.1.15	21K	Omicron	GRA	(NSP5_P132H,Spike_H69del,Spike_T95I,Spike_A67V,NSP6_S106del,Spike_N969K,Spike_H655Y,Spike_N856K,N_R203K,Spike_G142D,NSP3_A1892T,Spike_Q954H,Spike_G339D,NS3_L106F,N_P13L,NSP3_L1266I,N_R32del,NSP3_S1265del,NSP14_I42V,Spike_P681H,Spike_Y144del,M_Q19E,N_S33del,NSP4_T492I,NSP6_L105del,Spike_N679K,Spike_N764K,NSP6_G107del,N_E31del,NSP3_K38R,NSP6_I189V,Spike_T547K,M_D3G,Spike_D796Y,N_G204R,N_D343G,E_T9I…
hCoV-19/USA/WI-MHDL-2021120394/2021	EPI_ISL_7877077	2021-12-12	North America / USA / Wisconsin / Milwaukee County	Human	Original	Nanopore Clear Dx	BIP-WV6	BA.1.15	21K	Omicron	GRA	(NSP5_P132H,Spike_H69del,Spike_T95I,Spike_A67V,NSP6_S106del,Spike_N969K,Spike_H655Y,Spike_N856K,N_R203K,Spike_G142D,NSP3_A1892T,Spike_Q954H,Spike_G339D,NS3_L106F,N_P13L,NSP3_L1266I,N_R32del,NSP3_S1265del,NSP14_I42V,Spike_P681H,Spike_Y144del,M_Q19E,N_S33del,NSP4_T492I,NSP6_L105del,Spike_N679K,Spike_N764K,NSP6_G107del,N_E31del,NSP3_K38R,NSP6_I189V,Spike_T547K,Spike_D796Y,N_G204R,N_D343G,Spike_V70de…
hCoV-19/USA/WI-MHDL-2021120397/2021	EPI_ISL_7877078	2021-12-12	North America / USA / Wisconsin / Milwaukee County	Human	Original	Nanopore Clear Dx	BIP-WV6	BA.1.15	21K	Omicron	GRA	(NSP5_P132H,Spike_H69del,Spike_T95I,Spike_A67V,NSP6_S106del,Spike_N969K,Spike_H655Y,Spike_N856K,N_R203K,Spike_G142D,NSP3_A1892T,Spike_Q954H,Spike_G339D,NS3_L106F,N_P13L,NSP3_L1266I,N_R32del,NSP3_S1265del,NSP14_I42V,Spike_P681H,Spike_Y144del,M_Q19E,N_S33del,NSP4_T492I,NSP6_L105del,Spike_N679K,Spike_N764K,NSP6_G107del,N_E31del,NSP3_K38R,NSP6_I189V,Spike_T547K,Spike_D796Y,N_G204R,N_D343G,Spike_V70de…
hCoV-19/USA/WI-MHDL-2021120398/2021	EPI_ISL_7877079	2021-12-12	North America / USA / Wisconsin / Milwaukee County	Human	Original	Nanopore Clear Dx	BIP-WV6	BA.1.15	21K	Omicron	GRA	(NSP5_P132H,Spike_H69del,Spike_T95I,Spike_A67V,NSP6_S106del,Spike_N969K,Spike_H655Y,Spike_N856K,N_R203K,Spike_G142D,NSP3_A1892T,Spike_Q954H,Spike_G339D,NS3_L106F,N_P13L,NSP3_L1266I,N_R32del,NSP3_S1265del,NSP14_I42V,Spike_P681H,Spike_Y144del,M_Q19E,N_S33del,NSP4_T492I,NSP6_L105del,Spike_N679K,Spike_N764K,NSP6_G107del,N_E31del,NSP3_K38R,NSP6_I189V,Spike_T547K,Spike_D796Y,N_G204R,N_D343G,Spike_V70de…
hCoV-19/USA/WI-MHDL-2021120401/2021	EPI_ISL_7877080	2021-12-12	North America / USA / Wisconsin / Milwaukee County	Human	Original	Nanopore Clear Dx	BIP-WV6	BA.1.15	21K	Omicron	GRA	(NSP5_P132H,Spike_H69del,Spike_T95I,Spike_A67V,NSP6_S106del,Spike_N969K,Spike_H655Y,Spike_N856K,N_R203K,Spike_G142D,NSP3_A1892T,Spike_Q954H,Spike_G339D,NS3_L106F,N_P13L,NSP3_L1266I,N_R32del,NSP3_S1265del,NSP14_I42V,Spike_P681H,Spike_Y144del,M_Q19E,N_S33del,NSP4_T492I,NSP6_L105del,Spike_N679K,Spike_N764K,NSP6_G107del,N_E31del,NSP3_K38R,NSP6_I189V,Spike_T547K,Spike_D796Y,N_G204R,N_D343G,Spike_V70de…
hCoV-19/USA/WI-MHDL-2021120402/2021	EPI_ISL_7877081	2021-12-12	North America / USA / Wisconsin / Milwaukee County	Human	Original	Nanopore Clear Dx	BIP-WV6	BA.1.15	21K	Omicron	GRA	(NSP5_P132H,Spike_H69del,Spike_T95I,Spike_A67V,NSP6_S106del,Spike_N969K,Spike_H655Y,Spike_N856K,N_R203K,Spike_G142D,NSP3_A1892T,Spike_Q954H,Spike_G339D,NS3_L106F,N_P13L,NSP3_L1266I,N_R32del,NSP3_S1265del,NSP14_I42V,Spike_P681H,Spike_Y144del,M_Q19E,N_S33del,NSP4_T492I,NSP6_L105del,Spike_N679K,Spike_N764K,NSP6_G107del,N_E31del,NSP3_K38R,NSP6_I189V,Spike_T547K,Spike_D796Y,N_G204R,N_D343G,Spike_V70de…
hCoV-19/USA/WI-MHDL-2021120405/2021	EPI_ISL_7877082	2021-12-12	North America / USA / Wisconsin / Milwaukee County	Human	Original	Nanopore Clear Dx	BIP-WV6	BA.1.15	21K	Omicron	GRA	(NSP5_P132H,Spike_H69del,Spike_T95I,Spike_A67V,NSP6_S106del,Spike_N969K,Spike_H655Y,Spike_N856K,N_R203K,Spike_G142D,NSP3_A1892T,Spike_Q954H,Spike_G339D,NS3_L106F,N_P13L,NSP3_L1266I,N_R32del,NSP3_S1265del,NSP14_I42V,Spike_P681H,Spike_Y144del,M_Q19E,N_S33del,NSP4_T492I,NSP6_L105del,Spike_N679K,Spike_N764K,NSP6_G107del,N_E31del,NSP3_K38R,NSP6_I189V,Spike_T547K,Spike_D796Y,N_G204R,N_D343G,Spike_V70de…
hCoV-19/USA/WI-MHDL-2021120393/2021	EPI_ISL_7877083	2021-12-12	North America / USA / Wisconsin / Milwaukee County	Human	Original	Nanopore Clear Dx	BIP-WV6	BA.1.15	21K	Omicron	GRA	(NSP5_P132H,Spike_H69del,Spike_T95I,Spike_A67V,NSP1_V108A,NSP6_S106del,Spike_N969K,Spike_H655Y,Spike_N856K,N_R203K,Spike_G142D,NSP3_A1892T,Spike_Q954H,Spike_G339D,NS3_L106F,N_P13L,NSP3_L1266I,N_R32del,NSP3_S1265del,NSP14_I42V,Spike_P681H,Spike_Y144del,M_Q19E,N_S33del,NSP4_T492I,NSP6_L105del,Spike_N679K,Spike_N764K,NSP6_G107del,N_E31del,NSP3_K38R,NSP6_I189V,Spike_T547K,Spike_D796Y,N_G204R,N_D343G,…
hCoV-19/USA/WI-MHDL-2021120395/2021	EPI_ISL_7877084	2021-12-12	North America / USA / Wisconsin / Milwaukee County	Human	Original	Nanopore Clear Dx	BIP-WV6	BA.1.15	21K	Omicron	GRA	(NSP5_P132H,Spike_H69del,Spike_T95I,Spike_A67V,NSP6_S106del,Spike_N969K,Spike_H655Y,Spike_N856K,N_R203K,Spike_G142D,NSP3_A1892T,Spike_Q954H,Spike_G339D,NS3_L106F,N_P13L,NSP3_L1266I,N_R32del,NSP3_S1265del,NSP14_I42V,Spike_P681H,Spike_Y144del,M_Q19E,N_S33del,NSP4_T492I,NSP6_L105del,Spike_N679K,Spike_N764K,NSP6_G107del,N_E31del,NSP3_K38R,NSP6_I189V,Spike_T547K,Spike_D796Y,N_G204R,N_D343G,Spike_V70de…
hCoV-19/USA/WI-MHDL-2021120396/2021	EPI_ISL_7877085	2021-12-12	North America / USA / Wisconsin / Milwaukee County	Human	Original	Nanopore Clear Dx	BIP-WV6	BA.1.15	21K	Omicron	GRA	(NSP5_P132H,Spike_H69del,Spike_T95I,Spike_A67V,NSP6_S106del,Spike_N969K,Spike_H655Y,Spike_N856K,N_R203K,Spike_G142D,NSP3_A1892T,Spike_Q954H,Spike_G339D,NS3_L106F,N_P13L,NSP3_L1266I,N_R32del,NSP3_S1265del,NSP14_I42V,Spike_P681H,Spike_Y144del,M_Q19E,N_S33del,NSP4_T492I,NSP6_L105del,Spike_N679K,Spike_N764K,NSP6_G107del,N_E31del,NSP3_K38R,NSP6_I189V,Spike_T547K,Spike_D796Y,N_G204R,N_D343G,Spike_V70de…
hCoV-19/USA/WI-MHDL-2021120399/2021	EPI_ISL_7877086	2021-12-12	North America / USA / Wisconsin / Milwaukee County	Human	Original	Nanopore Clear Dx	BIP-WV6	BA.1.15	21K	Omicron	GRA	(NSP5_P132H,Spike_H69del,Spike_T95I,Spike_A67V,NSP6_S106del,Spike_N969K,Spike_H655Y,Spike_N856K,N_R203K,Spike_G142D,NSP3_A1892T,Spike_Q954H,Spike_G339D,NS3_L106F,N_P13L,NSP3_L1266I,N_R32del,NSP3_S1265del,NSP14_I42V,Spike_P681H,Spike_Y144del,M_Q19E,N_S33del,NSP4_T492I,NSP6_L105del,Spike_N679K,Spike_N764K,NSP6_G107del,N_E31del,NSP3_K38R,NSP6_I189V,Spike_T547K,Spike_D796Y,N_G204R,N_D343G,Spike_V70de…
hCoV-19/USA/WI-MHDL-2021120363/2021	EPI_ISL_7744413	2021-12-13	North America / USA / Wisconsin / Milwaukee County	Human	Original	Nanopore Clear Dx	BIP-WV6	BA.1.20	21K	Omicron	GRA	(NSP5_P132H,Spike_H69del,Spike_T95I,Spike_A67V,NSP6_S106del,Spike_N969K,Spike_H655Y,Spike_N856K,N_P67S,N_R203K,Spike_G142D,NSP3_A1892T,Spike_Q954H,Spike_G339D,N_P13L,NSP3_L1266I,N_R32del,NSP3_S1265del,Spike_P681H,Spike_Y144del,M_Q19E,N_S33del,NSP4_T492I,NSP6_L105del,Spike_N679K,Spike_N764K,NSP6_G107del,N_E31del,NSP3_K38R,NSP6_I189V,Spike_T547K,Spike_D796Y,N_G204R,Spike_V70del,Spike_L981F,Spike_V1…
hCoV-19/USA/WI-MHDL-2021120364/2021	EPI_ISL_7744414	2021-12-13	North America / USA / Wisconsin / Milwaukee County	Human	Original	Nanopore Clear Dx	BIP-WV6	AY.75	21I	Delta	GK	(N_D63G,M_S197N,N_R203M,NSP12_G671S,NSP6_T181I,NS3_S26L,N_R209I,Spike_P681R,Spike_R158del,NS7a_V82A,NSP2_E345A,Spike_F157del,Spike_T19R,NS7a_T120I,Spike_A222V,N_D377Y,M_I82T,NSP6_V149A,Spike_D950N,NSP3_P822L,NSP13_P77L,Spike_E156G,NSP4_A446V,NS3_G224C,Spike_T478K,NSP12_P323L,Spike_D614G,Spike_L452R)
hCoV-19/USA/WI-MHDL-2021120365/2021	EPI_ISL_7744415	2021-12-13	North America / USA / Wisconsin / Milwaukee County	Human	Original	Nanopore Clear Dx	BIP-WV6	AY.3	21J	Delta	GK	(N_D63G,NSP12_G671S,NSP6_I162V,NS3_S26L,Spike_P681R,Spike_R158del,NSP3_P1228L,NS7a_V82A,NSP3_A488S,Spike_F157del,NSP4_T492I,NSP14_A394V,Spike_T19R,NS7a_T120I,N_D377Y,M_I82T,Spike_D950N,NS7b_T40I,NSP13_P77L,Spike_E156G,Spike_T1117I,NSP3_P1469S,Spike_T478K,NSP6_T77A,NSP12_P323L,Spike_D614G,NSP4_V167L)
hCoV-19/USA/WI-MHDL-2021120366/2021	EPI_ISL_7744416	2021-12-13	North America / USA / Wisconsin / Milwaukee County	Human	Original	Nanopore Clear Dx	BIP-WV6	AY.103	21J	Delta	GK	(N_G215C,N_D63G,N_R203M,NSP12_G671S,NSP13_I334V,NS3_S26L,Spike_P681R,Spike_R158del,NSP3_P1228L,NS7a_V82A,NSP3_A488S,Spike_F157del,NSP4_T492I,NSP14_A394V,Spike_T19R,NS7a_T120I,N_D377Y,M_I82T,Spike_D950N,NS7b_T40I,NSP13_P77L,Spike_E156G,NSP3_P1469S,NSP6_T77A,NSP14_S137I,NSP5_L220F,NSP12_P323L,Spike_D614G,NSP4_V167L)
hCoV-19/USA/WI-MHDL-2021120368/2021	EPI_ISL_7744418	2021-12-13	North America / USA / Wisconsin / Milwaukee County	Human	Original	Nanopore Clear Dx	BIP-WV6	BA.1.20	21K	Omicron	GRA	(NSP5_P132H,NSP3_S692F,Spike_H69del,Spike_T95I,Spike_A67V,NSP6_S106del,Spike_N969K,Spike_H655Y,Spike_N856K,N_P67S,N_R203K,Spike_G142D,NSP3_A1892T,Spike_Q954H,Spike_G339D,N_P13L,NSP3_L1266I,N_R32del,NSP3_S1265del,NSP14_I42V,Spike_P681H,Spike_Y144del,M_Q19E,N_S33del,NSP4_T492I,NSP6_L105del,Spike_N679K,Spike_N764K,NSP6_G107del,N_E31del,NSP3_K38R,NSP6_I189V,Spike_T547K,Spike_D796Y,N_G204R,Spike_V70de…
hCoV-19/USA/WI-MHDL-2021120410/2021	EPI_ISL_7877065	2021-12-13	North America / USA / Wisconsin / Milwaukee County	Human	Original	Nanopore Clear Dx	BIP-WV6	AY.103	21J	Delta	GK	(N_G215C,N_D63G,N_R203M,NSP12_G671S,NSP13_I334V,NS3_S26L,Spike_P681R,NS8_W45L,Spike_R158del,NSP3_P1228L,NS7a_V82A,NSP3_A488S,Spike_F157del,NSP4_T492I,NSP14_A394V,Spike_T19R,NS7a_T120I,NS8_C83F,N_D377Y,M_I82T,Spike_D950N,NS7b_T40I,NSP13_P77L,Spike_E156G,NSP3_P1469S,Spike_T478K,NSP6_T77A,NSP14_S137I,NSP12_P323L,Spike_D614G,NSP4_V167L,NSP6_L37F,Spike_L452R)
hCoV-19/USA/WI-MHDL-2021120499/2021	EPI_ISL_8185125	2021-12-13	North America / USA / Wisconsin / Milwaukee County	Human	Original	Nanopore Clear Dx	BIP-WV6	AY.100	21J	Delta	GK	(N_G215C,N_D63G,N_R203M,NSP3_A54T,NSP12_G671S,NS3_S26L,NSP13_A296S,Spike_P681R,Spike_R158del,NSP3_P1228L,NSP4_M366V,NS7a_V82A,NSP3_A488S,Spike_F157del,NSP4_T492I,NSP14_A394V,Spike_T19R,NS7a_T120I,NSP12_L270F,N_D377Y,M_I82T,NSP3_N1543K,Spike_D950N,NS7b_T40I,NSP13_P77L,Spike_E156G,NSP3_P1469S,Spike_T478K,NSP6_T77A,NSP12_P323L,Spike_D614G,NSP4_V167L,Spike_L452R)
hCoV-19/USA/WI-MHDL-2022010051/2021	EPI_ISL_8428606	2021-12-13	North America / USA / Wisconsin / Milwaukee County	Human	Original	Nanopore Clear Dx	BIP-WV6	AY.3	21J	Delta	GK	(N_G215C,N_D63G,NSP12_G671S,NS3_D210A,NSP6_I162V,NS3_S26L,Spike_P681R,Spike_R158del,NSP3_P1228L,NS7a_V82A,NSP3_A488S,Spike_F157del,NSP4_T492I,NSP14_A394V,Spike_T19R,NS7a_T120I,N_D377Y,M_I82T,Spike_D950N,NS7b_T40I,NSP13_P77L,NSP12_G670S,Spike_E156G,NSP3_P1469S,Spike_T478K,NSP6_T77A,N_G34W,NSP12_P323L,Spike_D614G,NSP4_V167L,Spike_L452R,N_R203T,NSP3_S1843F)
hCoV-19/USA/WI-MHDL-2022010052/2021	EPI_ISL_8428607	2021-12-13	North America / USA / Wisconsin / Milwaukee County	Human	Original	Nanopore Clear Dx	BIP-WV6	AY.119	21J	Delta	GK	(N_G215C,Spike_P809S,N_D63G,N_R203M,NSP12_G671S,NS3_S26L,Spike_P681R,Spike_R158del,NSP3_P1228L,NSP9_T24I,M_H155Y,NS7a_V82A,NSP3_A488S,Spike_F157del,NSP4_T492I,NSP14_A394V,Spike_T19R,NS7a_T120I,N_D377Y,M_I82T,Spike_D950N,NS7b_T40I,NSP13_P77L,NSP14_A323S,Spike_E156G,NSP3_P1469S,NSP3_I508T,NSP10_G125S,NSP4_A92V,Spike_T478K,NSP6_T77A,NS7a_V71L,NSP12_P323L,Spike_D614G,NSP4_V167L,NSP6_L37F,Spike_L452R,…
hCoV-19/USA/WI-MHDL-2022010053/2021	EPI_ISL_8428608	2021-12-13	North America / USA / Wisconsin / Milwaukee County	Human	Original	Nanopore Clear Dx	BIP-WV6	AY.44	21J	Delta	GK	(N_G215C,NS8_L60F,N_D63G,N_R203M,NSP12_G671S,NSP16_Q3K,NS3_I232V,NS3_S26L,Spike_P681R,Spike_R158del,NSP3_P1228L,NS7a_V82A,NSP3_A488S,Spike_F157del,NSP4_T492I,NSP14_A394V,Spike_T19R,NS7a_T120I,NSP12_F192V,N_D377Y,NSP13_H164Y,M_I82T,Spike_D950N,NS7b_T40I,NSP3_A1736V,NSP13_P77L,Spike_E156G,NSP3_H1307Y,NSP3_P1469S,Spike_T478K,NSP6_T77A,NSP12_P323L,Spike_D614G,NSP4_V167L,Spike_L452R)
hCoV-19/USA/WI-MHDL-2022010054/2021	EPI_ISL_8428609	2021-12-13	North America / USA / Wisconsin / Milwaukee County	Human	Original	Nanopore Clear Dx	BIP-WV6	AY.103	21J	Delta	GK	(N_G215C,N_D63G,N_R203M,NSP12_G671S,NSP13_I334V,N_S194L,NS3_S26L,Spike_P681R,Spike_I434V,Spike_R158del,NSP3_P1228L,NS7a_V82A,NSP3_A488S,Spike_F157del,NSP4_T492I,NSP14_A394V,Spike_T19R,NS7a_T120I,N_D377Y,M_I82T,Spike_D950N,NS7b_T40I,NSP13_P77L,Spike_E156G,NSP3_P1469S,Spike_T478K,NSP6_T77A,NSP12_P323L,Spike_D614G,Spike_L452R,NSP4_V167L)
hCoV-19/USA/WI-MHDL-2022010175/2021	EPI_ISL_8565370	2021-12-14	North America / USA / Wisconsin / Milwaukee County	Human	Original	Illumina MiSeq	DRAGEN COVID lineage v3.5.5	BA.1.15	21K	Omicron	GRA	(NSP5_P132H,Spike_H69del,Spike_T95I,Spike_A67V,Spike_S373P,NSP6_S106del,Spike_Q493R,Spike_N969K,Spike_H655Y,Spike_N856K,N_R203K,Spike_S371L,NSP3_A1892T,Spike_Q954H,Spike_G339D,NS3_L106F,N_P13L,Spike_N501Y,N_R32del,NSP14_I42V,Spike_P681H,M_Q19E,N_S33del,NSP4_T492I,Spike_S375F,NSP6_L105del,Spike_Q498R,Spike_N679K,NSP6_G107del,Spike_Y505H,N_E31del,NSP3_K38R,NSP6_I189V,Spike_T547K,M_D3G,Spike_D796Y,S…
hCoV-19/USA/WI-MHDL-2022010176/2021	EPI_ISL_8565371	2021-12-14	North America / USA / Wisconsin / Milwaukee County	Human	Original	Illumina MiSeq	DRAGEN COVID lineage v3.5.5	BA.1.15	21K	Omicron	GRA	(NSP5_P132H,Spike_H69del,Spike_T95I,Spike_A67V,Spike_S373P,Spike_Q493R,Spike_N969K,Spike_H655Y,Spike_N856K,N_R203K,NSP3_A1892T,Spike_Q954H,NS3_L106F,N_P13L,Spike_N501Y,N_R32del,M_Q19E,NSP4_T492I,NSP6_L105del,Spike_N679K,Spike_N764K,Spike_Y505H,NSP6_G107del,NSP6_I189V,Spike_T547K,M_D3G,Spike_D796Y,N_G204R,N_D343G,Spike_T478K,M_A63T,Spike_G496S,NSP6_S106del,Spike_S371L,Spike_G339D,NSP14_I42V,Spike_…
hCoV-19/USA/WI-MHDL-2022010177/2021	EPI_ISL_8565372	2021-12-14	North America / USA / Wisconsin / Milwaukee County	Human	Original	Illumina MiSeq	DRAGEN COVID lineage v3.5.5	BA.1.15	21K	Omicron	GRA	(NSP5_P132H,Spike_H69del,Spike_T95I,Spike_A67V,Spike_S373P,Spike_Q493R,Spike_N969K,Spike_H655Y,Spike_N856K,N_R203K,Spike_G142D,NSP3_A1892T,Spike_Q954H,NS3_L106F,N_P13L,NSP3_L1266I,Spike_N501Y,N_R32del,M_Q19E,NSP4_T492I,NSP6_L105del,Spike_N679K,Spike_N764K,Spike_L212I,NSP6_G107del,Spike_Y505H,NSP6_I189V,Spike_T547K,M_D3G,Spike_D796Y,N_G204R,N_D343G,Spike_T478K,Spike_V143del,M_A63T,Spike_G496S,NSP6…
hCoV-19/USA/WI-MHDL-2021120411/2021	EPI_ISL_7877067	2021-12-14	North America / USA / Wisconsin / Milwaukee County	Human	Original	Nanopore Clear Dx	BIP-WV6	AY.103	21J	Delta	GK	(N_G215C,N_D63G,N_R203M,NSP12_G671S,NSP13_I334V,NSP1_M85V,N_T379I,NS3_S26L,Spike_K182I,NSP8_P178H,Spike_P681R,Spike_R158del,NSP3_P1228L,NS7a_V82A,NSP3_A488S,Spike_F157del,NSP4_T492I,NSP14_A394V,Spike_T19R,NS7a_T120I,N_D377Y,M_I82T,Spike_D950N,NS7b_T40I,NSP13_P77L,Spike_E156G,NSP3_P1469S,Spike_T478K,NSP6_T77A,NSP12_P323L,Spike_D614G,NSP4_V167L,Spike_L452R)
hCoV-19/USA/WI-MHDL-2021120412/2021	EPI_ISL_7877068	2021-12-14	North America / USA / Wisconsin / Milwaukee County	Human	Original	Nanopore Clear Dx	BIP-WV6	AY.103	21J	Delta	GK	(N_G215C,N_D63G,N_R203M,NSP12_G671S,NSP13_I334V,NSP1_M85V,N_T379I,NS3_S26L,Spike_K182I,NSP8_P178H,Spike_P681R,Spike_R158del,NSP3_P1228L,NS7a_V82A,NSP3_A488S,Spike_F157del,NSP4_T492I,NSP14_A394V,Spike_T19R,NS7a_T120I,N_D377Y,M_I82T,Spike_D950N,NS7b_T40I,NSP13_P77L,Spike_E156G,NSP3_P1469S,Spike_T478K,NSP6_T77A,NSP12_P323L,Spike_D614G,NSP4_V167L,Spike_L452R)
hCoV-19/USA/WI-MHDL-2021120384/2021	EPI_ISL_7877070	2021-12-14	North America / USA / Wisconsin / Milwaukee County	Human	Original	Nanopore Clear Dx	BIP-WV6	AY.103	21J	Delta	GK	(N_G215C,N_D63G,N_A208S,N_R203M,NSP12_G671S,NSP13_I334V,NS3_P104S,NS3_S26L,Spike_P681R,Spike_R158del,NSP3_P1228L,NS7a_V82A,NSP3_A488S,Spike_F157del,NSP4_T492I,Spike_Q677H,NSP14_A394V,Spike_T19R,NS7a_T120I,N_D377Y,M_I82T,Spike_D950N,NS7b_T40I,NSP13_P77L,Spike_E156G,NSP3_P1469S,Spike_T478K,NSP6_T77A,NSP12_P323L,Spike_D614G,NSP4_V167L,Spike_L452R)
hCoV-19/USA/WI-MHDL-2021120385/2021	EPI_ISL_7877072	2021-12-14	North America / USA / Wisconsin / Milwaukee County	Human	Original	Nanopore Clear Dx	BIP-WV6	BA.1.1.18	21K	Omicron	GRA	(NSP5_P132H,Spike_H69del,Spike_T95I,Spike_A67V,NSP6_S106del,Spike_N969K,Spike_H655Y,Spike_N856K,N_R203K,Spike_G142D,NSP3_A1892T,Spike_Q954H,Spike_G339D,N_P13L,NSP3_L1266I,N_R32del,NSP3_S1265del,NSP14_I42V,Spike_P681H,Spike_Y144del,M_Q19E,N_S33del,NSP4_T492I,NSP6_L105del,Spike_N679K,Spike_N764K,NSP3_A1736V,NSP6_G107del,N_E31del,NSP3_K38R,Spike_R346K,NSP6_I189V,Spike_T547K,Spike_D796Y,N_G204R,E_T9I…
hCoV-19/USA/WI-MHDL-2021120446/2021	EPI_ISL_7979270	2021-12-14	North America / USA / Wisconsin / Milwaukee County	Human	Original	Nanopore Clear Dx	BIP-WV6	AY.39	21J	Delta	GK	(N_G215C,N_D63G,N_R203M,NSP12_G671S,NSP16_Q238H,Spike_D1127G,Spike_G219S,NS3_S26L,Spike_P681R,Spike_R158del,NSP3_P1228L,NSP12_D358A,NS7a_V82A,NSP3_A488S,Spike_F157del,NSP4_T492I,NSP14_A394V,NS7a_T120I,NSP9_P57S,N_D377Y,NSP15_V127F,M_I82T,Spike_D950N,NS7b_T40I,NSP13_P77L,M_L34F,Spike_E156G,NSP3_P1469S,NS7a_V71I,NSP6_T77A,NSP12_P323L,NSP15_V84L,Spike_D614G,NSP4_V167L)
hCoV-19/USA/WI-MHDL-2022010008/2021	EPI_ISL_8388846	2021-12-14	North America / USA / Wisconsin / Milwaukee County	Human	Original	Nanopore Clear Dx	BIP-WV6	BA.1.15	21K	Omicron	GRA	(NSP5_P132H,Spike_H69del,Spike_T95I,Spike_A67V,NSP6_S106del,Spike_N969K,Spike_H655Y,Spike_N856K,N_R203K,Spike_G142D,NSP3_A1892T,NSP14_L177F,Spike_Q954H,Spike_G339D,NS3_L106F,N_P13L,NSP3_L1266I,N_R32del,NSP3_S1265del,NSP14_I42V,Spike_P681H,Spike_Y144del,M_Q19E,N_S33del,NSP4_T492I,NSP6_L105del,Spike_N679K,Spike_N764K,NSP6_G107del,N_E31del,NSP6_I189V,Spike_T547K,Spike_D796Y,N_G204R,N_D343G,Spike_V70…
hCoV-19/USA/WI-MHDL-2022010002/2021	EPI_ISL_8388847	2021-12-14	North America / USA / Wisconsin / Milwaukee County	Human	Original	Nanopore Clear Dx	BIP-WV6	BA.1.15	21K	Omicron	GRA	(NSP5_P132H,Spike_H69del,Spike_T95I,Spike_A67V,NSP6_S106del,Spike_N969K,Spike_H655Y,Spike_N856K,N_R203K,Spike_G142D,NSP3_A1892T,NSP14_L177F,Spike_Q954H,Spike_G339D,NS3_L106F,N_P13L,NSP3_L1266I,N_R32del,NSP3_S1265del,NSP14_I42V,Spike_P681H,Spike_Y144del,M_Q19E,N_S33del,NSP4_T492I,NSP6_L105del,Spike_N679K,Spike_N764K,NSP6_G107del,N_E31del,NSP6_I189V,Spike_T547K,Spike_D796Y,N_G204R,N_D343G,Spike_V70…
hCoV-19/USA/WI-MHDL-2022010004/2021	EPI_ISL_8388851	2021-12-14	North America / USA / Wisconsin / Milwaukee County	Human	Original	Nanopore Clear Dx	BIP-WV6	BA.1.15	21K	Omicron	GRA	(NSP5_P132H,Spike_H69del,Spike_T95I,Spike_A67V,NSP6_S106del,Spike_N969K,Spike_H655Y,Spike_N856K,N_R203K,Spike_G142D,NSP3_A1892T,NSP14_L177F,Spike_Q954H,Spike_G339D,NS3_L106F,N_P13L,NSP3_L1266I,N_R32del,NSP3_S1265del,NSP14_I42V,Spike_P681H,Spike_Y144del,M_Q19E,N_S33del,NSP4_T492I,NSP6_L105del,Spike_N679K,Spike_N764K,NSP6_G107del,N_E31del,NSP3_K38R,NSP6_I189V,Spike_T547K,M_D3G,Spike_D796Y,N_G204R,N…
hCoV-19/USA/WI-MHDL-2022010010/2021	EPI_ISL_8388852	2021-12-14	North America / USA / Wisconsin / Milwaukee County	Human	Original	Nanopore Clear Dx	BIP-WV6	BA.1.15	21K	Omicron	GRA	(NSP5_P132H,Spike_H69del,Spike_T95I,Spike_A67V,NSP6_S106del,Spike_N969K,Spike_H655Y,Spike_N856K,N_R203K,Spike_G142D,NSP3_A1892T,NSP14_L177F,Spike_Q954H,Spike_G339D,NS3_L106F,N_P13L,NSP3_L1266I,N_R32del,NSP3_S1265del,NSP14_I42V,Spike_P681H,Spike_Y144del,M_Q19E,N_S33del,NSP4_T492I,NSP6_L105del,Spike_N679K,Spike_N764K,NSP6_G107del,N_E31del,NSP3_K38R,NSP6_I189V,Spike_T547K,M_D3G,Spike_D796Y,N_G204R,N…
hCoV-19/USA/WI-MHDL-2022010001/2021	EPI_ISL_8388855	2021-12-14	North America / USA / Wisconsin / Milwaukee County	Human	Original	Nanopore Clear Dx	BIP-WV6	BA.1.15	21K	Omicron	GRA	(NSP5_P132H,Spike_H69del,Spike_T95I,Spike_A67V,NSP6_S106del,Spike_N969K,Spike_H655Y,Spike_N856K,N_R203K,Spike_G142D,NSP3_A1892T,Spike_Q954H,Spike_G339D,NS3_L106F,N_P13L,NSP3_L1266I,N_R32del,NSP3_S1265del,NSP14_I42V,Spike_P681H,Spike_Y144del,M_Q19E,N_S33del,NSP4_T492I,NSP6_L105del,Spike_N679K,Spike_N764K,NSP6_G107del,N_E31del,NSP3_K38R,NSP6_I189V,Spike_T547K,Spike_D796Y,N_G204R,N_D343G,Spike_V70de…
hCoV-19/USA/WI-MHDL-2022010003/2021	EPI_ISL_8388856	2021-12-14	North America / USA / Wisconsin / Milwaukee County	Human	Original	Nanopore Clear Dx	BIP-WV6	BA.1.15	21K	Omicron	GRA	(NSP5_P132H,Spike_H69del,Spike_T95I,Spike_A67V,NSP6_S106del,Spike_N969K,Spike_H655Y,Spike_N856K,N_R203K,Spike_G142D,NSP3_A1892T,Spike_Q954H,Spike_G339D,NS3_L106F,N_P13L,NSP3_L1266I,N_R32del,NSP3_S1265del,NSP14_I42V,Spike_P681H,Spike_Y144del,M_Q19E,N_S33del,NSP4_T492I,NSP6_L105del,Spike_N679K,Spike_N764K,NSP6_G107del,N_E31del,NSP3_K38R,NSP6_I189V,Spike_T547K,Spike_D796Y,N_G204R,N_D343G,Spike_V70de…
hCoV-19/USA/WI-MHDL-2022010005/2021	EPI_ISL_8388857	2021-12-14	North America / USA / Wisconsin / Milwaukee County	Human	Original	Nanopore Clear Dx	BIP-WV6	BA.1.15	21K	Omicron	GRA	(NSP5_P132H,Spike_H69del,Spike_T95I,Spike_A67V,NSP6_S106del,Spike_N969K,Spike_H655Y,Spike_N856K,N_R203K,Spike_G142D,NSP3_A1892T,NSP14_L177F,Spike_Q954H,Spike_G339D,NS3_L106F,N_P13L,NSP3_L1266I,N_R32del,NSP3_S1265del,NSP14_I42V,Spike_P681H,Spike_Y144del,M_Q19E,N_S33del,NSP4_T492I,NSP6_L105del,Spike_N679K,Spike_N764K,NSP6_G107del,N_E31del,NSP3_K38R,NSP6_I189V,Spike_T547K,Spike_D796Y,N_G204R,N_D343G…
hCoV-19/USA/WI-MHDL-2022010006/2021	EPI_ISL_8388858	2021-12-14	North America / USA / Wisconsin / Milwaukee County	Human	Original	Nanopore Clear Dx	BIP-WV6	BA.1.15	21K	Omicron	GRA	(NSP5_P132H,Spike_H69del,Spike_T95I,Spike_A67V,NSP6_S106del,Spike_N969K,Spike_H655Y,Spike_N856K,N_R203K,Spike_G142D,NSP3_A1892T,NSP14_L177F,Spike_Q954H,Spike_G339D,NS3_L106F,N_P13L,NSP3_L1266I,N_R32del,NSP3_S1265del,NSP14_I42V,Spike_P681H,Spike_Y144del,M_Q19E,N_S33del,NSP4_T492I,NSP6_L105del,Spike_N679K,Spike_N764K,NSP6_G107del,N_E31del,NSP3_K38R,NSP6_I189V,Spike_T547K,Spike_D796Y,N_G204R,N_D343G…
hCoV-19/USA/WI-MHDL-2022010007/2021	EPI_ISL_8388859	2021-12-14	North America / USA / Wisconsin / Milwaukee County	Human	Original	Nanopore Clear Dx	BIP-WV6	BA.1.15	21K	Omicron	GRA	(NSP5_P132H,Spike_H69del,Spike_T95I,Spike_A67V,NSP6_S106del,Spike_N969K,Spike_H655Y,Spike_N856K,N_R203K,Spike_G142D,NSP3_A1892T,NSP14_L177F,Spike_Q954H,Spike_G339D,NS3_L106F,N_P13L,NSP3_L1266I,N_R32del,NSP3_S1265del,NSP14_I42V,Spike_P681H,Spike_Y144del,M_Q19E,N_S33del,NSP4_T492I,NSP6_L105del,Spike_N679K,Spike_N764K,NSP6_G107del,N_E31del,NSP3_K38R,NSP6_I189V,Spike_T547K,Spike_D796Y,N_G204R,N_D343G…
hCoV-19/USA/WI-MHDL-2022010011/2021	EPI_ISL_8388860	2021-12-14	North America / USA / Wisconsin / Milwaukee County	Human	Original	Nanopore Clear Dx	BIP-WV6	BA.1.15	21K	Omicron	GRA	(NSP5_P132H,Spike_H69del,Spike_T95I,Spike_A67V,NSP6_S106del,Spike_N969K,Spike_H655Y,Spike_N856K,N_R203K,Spike_G142D,NSP3_A1892T,NSP14_L177F,Spike_Q954H,Spike_G339D,NS3_L106F,N_P13L,NSP3_L1266I,N_R32del,NSP3_S1265del,NSP14_I42V,Spike_P681H,Spike_Y144del,M_Q19E,N_S33del,NSP4_T492I,NSP6_L105del,Spike_N679K,Spike_N764K,NSP6_G107del,N_E31del,NSP3_K38R,NSP6_I189V,Spike_T547K,Spike_D796Y,N_G204R,N_D343G…
hCoV-19/USA/WI-MHDL-2022010012/2021	EPI_ISL_8388861	2021-12-14	North America / USA / Wisconsin / Milwaukee County	Human	Original	Nanopore Clear Dx	BIP-WV6	BA.1.15	21K	Omicron	GRA	(NSP5_P132H,Spike_H69del,Spike_T95I,Spike_A67V,NSP6_S106del,Spike_N969K,Spike_H655Y,Spike_N856K,N_R203K,Spike_G142D,NSP3_A1892T,NSP14_L177F,Spike_Q954H,Spike_G339D,NS3_L106F,N_P13L,NSP3_L1266I,N_R32del,NSP3_S1265del,NSP14_I42V,Spike_P681H,Spike_Y144del,M_Q19E,N_S33del,NSP4_T492I,NSP6_L105del,Spike_N679K,Spike_N764K,NSP6_G107del,N_E31del,NSP3_K38R,NSP6_I189V,Spike_T547K,Spike_D796Y,N_G204R,N_D343G…
hCoV-19/USA/WI-MHDL-2022010013/2021	EPI_ISL_8388862	2021-12-14	North America / USA / Wisconsin / Milwaukee County	Human	Original	Nanopore Clear Dx	BIP-WV6	BA.1.15	21K	Omicron	GRA	(NSP5_P132H,Spike_H69del,Spike_T95I,Spike_A67V,NSP6_S106del,Spike_N969K,Spike_H655Y,Spike_N856K,N_R203K,Spike_G142D,NSP3_A1892T,NSP14_L177F,Spike_Q954H,Spike_G339D,NS3_L106F,N_P13L,NSP3_L1266I,N_R32del,NSP3_S1265del,NSP14_I42V,Spike_P681H,Spike_Y144del,M_Q19E,N_S33del,NSP4_T492I,NSP6_L105del,Spike_N679K,Spike_N764K,NSP6_G107del,N_E31del,NSP3_K38R,NSP6_I189V,Spike_T547K,Spike_D796Y,N_G204R,N_D343G…
hCoV-19/USA/WI-MHDL-2022010014/2021	EPI_ISL_8388863	2021-12-14	North America / USA / Wisconsin / Milwaukee County	Human	Original	Nanopore Clear Dx	BIP-WV6	BA.1.15	21K	Omicron	GRA	(NSP5_P132H,Spike_H69del,Spike_T95I,Spike_A67V,NSP6_S106del,Spike_N969K,Spike_H655Y,Spike_N856K,N_R203K,Spike_G142D,NSP3_A1892T,NSP14_L177F,Spike_Q954H,Spike_G339D,NS3_L106F,N_P13L,NSP3_L1266I,N_R32del,NSP3_S1265del,NSP14_I42V,Spike_P681H,Spike_Y144del,M_Q19E,N_S33del,NSP4_T492I,NSP6_L105del,Spike_N679K,Spike_N764K,NSP6_G107del,N_E31del,NSP3_K38R,NSP6_I189V,Spike_T547K,Spike_D796Y,N_G204R,N_D343G…
hCoV-19/USA/WI-MHDL-2022010015/2021	EPI_ISL_8388864	2021-12-14	North America / USA / Wisconsin / Milwaukee County	Human	Original	Nanopore Clear Dx	BIP-WV6	BA.1.15	21K	Omicron	GRA	(NSP5_P132H,Spike_H69del,Spike_T95I,Spike_A67V,NSP6_S106del,Spike_N969K,Spike_H655Y,Spike_N856K,N_R203K,Spike_G142D,NSP3_A1892T,NSP14_L177F,Spike_Q954H,Spike_G339D,NS3_L106F,N_P13L,NSP3_L1266I,N_R32del,NSP3_S1265del,NSP14_I42V,Spike_P681H,Spike_Y144del,M_Q19E,N_S33del,NSP4_T492I,NSP6_L105del,Spike_N679K,Spike_N764K,NSP6_G107del,N_E31del,NSP3_K38R,NSP6_I189V,Spike_T547K,Spike_D796Y,N_G204R,N_D343G…
hCoV-19/USA/WI-MHDL-2022010017/2021	EPI_ISL_8388865	2021-12-14	North America / USA / Wisconsin / Milwaukee County	Human	Original	Nanopore Clear Dx	BIP-WV6	BA.1.15	21K	Omicron	GRA	(NSP5_P132H,Spike_H69del,Spike_T95I,Spike_A67V,NSP6_S106del,Spike_N969K,Spike_H655Y,Spike_N856K,N_R203K,Spike_G142D,NSP3_A1892T,NSP14_L177F,Spike_Q954H,Spike_G339D,NS3_L106F,N_P13L,NSP3_L1266I,N_R32del,NSP3_S1265del,NSP14_I42V,Spike_P681H,Spike_Y144del,M_Q19E,N_S33del,NSP4_T492I,NSP6_L105del,Spike_N679K,Spike_N764K,NSP6_G107del,N_E31del,NSP3_K38R,NSP6_I189V,Spike_T547K,Spike_D796Y,N_G204R,N_D343G…
hCoV-19/USA/WI-MHDL-2022010009/2021	EPI_ISL_8388868	2021-12-14	North America / USA / Wisconsin / Milwaukee County	Human	Original	Nanopore Clear Dx	BIP-WV6	BA.1.15	21K	Omicron	GRA	(NSP5_P132H,Spike_H69del,Spike_T95I,Spike_A67V,NSP6_S106del,Spike_N969K,Spike_H655Y,Spike_N856K,N_R203K,Spike_G142D,NSP3_A1892T,NSP14_L177F,Spike_Q954H,NS3_L106F,N_P13L,NSP3_L1266I,N_R32del,NSP3_S1265del,NSP14_I42V,Spike_P681H,Spike_Y144del,M_Q19E,N_S33del,NSP4_T492I,NSP6_L105del,Spike_N679K,Spike_N764K,NSP6_G107del,N_E31del,NSP3_K38R,NSP6_I189V,Spike_T547K,Spike_D796Y,N_G204R,N_D343G,Spike_V70de…
hCoV-19/USA/WI-MHDL-2022010173/2021	EPI_ISL_8565368	2021-12-15	North America / USA / Wisconsin / Milwaukee County	Human	Original	Illumina MiSeq	DRAGEN COVID lineage v3.5.5	AY.119.2	21J	Delta	GK	(N_G215C,N_D63G,N_R203M,NSP12_G671S,NS3_S26L,NS8_W45stop,Spike_P681R,NSP3_M768I,NS7a_V82A,Spike_Q675H,NSP4_T492I,NSP14_A394V,Spike_T19R,NS7a_T120I,N_D377Y,M_I82T,NSP15_A80V,Spike_D950N,NS7b_T40I,NSP13_P77L,NSP14_A323S,NSP4_A92V,NSP6_T77A,NSP12_P323L,Spike_D614G,N_T391I)
hCoV-19/USA/WI-MHDL-2022010174/2021	EPI_ISL_8565369	2021-12-15	North America / USA / Wisconsin / Milwaukee County	Human	Original	Illumina MiSeq	DRAGEN COVID lineage v3.5.5	BA.1.15	21K	Omicron	GRA	(NSP5_P132H,Spike_S373P,NSP6_S106del,Spike_N969K,Spike_H655Y,Spike_N856K,N_R203K,Spike_S371L,NSP3_A1892T,Spike_Q954H,Spike_G339D,NS3_L106F,N_P13L,N_R32del,NSP14_I42V,Spike_P681H,N_S33del,NSP4_T492I,Spike_S375F,NSP6_L105del,Spike_N679K,NSP12_P94L,Spike_N764K,NSP6_G107del,N_E31del,NSP6_I189V,M_D3G,Spike_D796Y,N_G204R,N_D343G,E_T9I,Spike_L981F,M_A63T,NSP12_P323L,Spike_D614G)
hCoV-19/USA/WI-MHDL-2021120391/2021	EPI_ISL_7877061	2021-12-15	North America / USA / Wisconsin / Milwaukee County	Human	Original	Nanopore Clear Dx	BIP-WV6	AY.3	21J	Delta	GK	(N_G215C,N_D63G,N_R203M,NSP12_G671S,NSP6_I162V,NS3_S26L,NSP3_S1589L,Spike_P681R,Spike_R158del,NSP3_P1228L,M_A2V,NS7a_V82A,NSP3_A488S,Spike_F157del,NSP4_T492I,NSP14_A394V,Spike_T19R,NS7a_T120I,N_D377Y,M_I82T,Spike_D950N,NS7b_T40I,NSP13_P77L,NSP3_K1771R,Spike_E156G,NSP3_P1469S,Spike_T478K,NSP6_T77A,NSP12_P323L,Spike_D614G,NSP4_V167L,Spike_L452R,NSP1_E87D)
hCoV-19/USA/WI-MHDL-2021120390/2021	EPI_ISL_7877075	2021-12-15	North America / USA / Wisconsin / Milwaukee County	Human	Original	Nanopore Clear Dx	BIP-WV6	BA.1.20	21K	Omicron	GRA	(NSP5_P132H,Spike_H69del,Spike_T95I,Spike_A67V,NSP6_S106del,Spike_N969K,Spike_H655Y,Spike_N856K,N_P67S,N_R203K,Spike_G142D,NSP3_A1892T,Spike_Q954H,Spike_G339D,N_P13L,NSP3_L1266I,N_R32del,NSP3_S1265del,NSP14_I42V,Spike_P681H,Spike_Y144del,M_Q19E,N_S33del,NSP4_T492I,NSP6_L105del,Spike_N679K,Spike_N764K,NSP6_G107del,N_E31del,NSP3_K38R,NSP6_I189V,Spike_T547K,M_D3G,Spike_D796Y,N_G204R,E_T9I,Spike_V70d…
hCoV-19/USA/WI-MHDL-2021120392/2021	EPI_ISL_7877076	2021-12-15	North America / USA / Wisconsin / Milwaukee County	Human	Original	Nanopore Clear Dx	BIP-WV6	BA.1.20	21K	Omicron	GRA	(NSP5_P132H,Spike_H69del,Spike_T95I,Spike_A67V,NSP6_S106del,Spike_N969K,Spike_H655Y,Spike_N856K,N_P67S,N_R203K,Spike_G142D,NSP3_A1892T,Spike_Q954H,Spike_G339D,N_P13L,NSP3_L1266I,N_R32del,NSP3_S1265del,NSP14_I42V,Spike_P681H,Spike_Y144del,M_Q19E,N_S33del,NSP4_T492I,NSP6_L105del,Spike_N679K,Spike_N764K,NSP6_G107del,N_E31del,NSP3_K38R,NSP6_I189V,Spike_T547K,Spike_D796Y,N_G204R,Spike_V70del,Spike_L98…
hCoV-19/USA/WI-MHDL-2021120500/2021	EPI_ISL_8185126	2021-12-15	North America / USA / Wisconsin / Milwaukee County	Human	Original	Nanopore Clear Dx	BIP-WV6	BA.1	21K	Omicron	GRA	(NSP5_P132H,Spike_H69del,Spike_T95I,Spike_A67V,Spike_Q493R,Spike_N969K,Spike_H655Y,Spike_N856K,N_R203K,Spike_G142D,NSP3_A1892T,Spike_Q954H,N_P13L,NSP3_L1266I,Spike_N501Y,N_R32del,M_Q19E,Spike_N440K,NSP4_T492I,NSP6_L105del,Spike_N679K,Spike_N764K,NSP6_G107del,Spike_Y505H,NSP6_I189V,Spike_T547K,M_D3G,Spike_D796Y,N_G204R,Spike_T478K,Spike_V143del,M_A63T,Spike_G496S,NSP6_S106del,Spike_G339D,NSP3_S126…
hCoV-19/USA/WI-MHDL-2022010026/2021	EPI_ISL_8388850	2021-12-15	North America / USA / Wisconsin / Milwaukee County	Human	Original	Nanopore Clear Dx	BIP-WV6	BA.1.15	21K	Omicron	GRA	(NSP5_P132H,Spike_H69del,Spike_T95I,Spike_A67V,Spike_Q493R,Spike_N969K,Spike_H655Y,Spike_N856K,N_R203K,Spike_G142D,NSP3_A1892T,Spike_Q954H,NS3_L106F,N_P13L,NSP3_L1266I,Spike_N501Y,N_R32del,M_Q19E,Spike_N440K,NSP4_T492I,NSP6_L105del,Spike_N679K,Spike_N764K,NSP6_G107del,Spike_Y505H,NSP6_I189V,Spike_T547K,M_D3G,Spike_D796Y,N_G204R,N_D343G,Spike_T478K,Spike_V143del,M_A63T,Spike_G496S,NSP6_S106del,Spi…
hCoV-19/USA/WI-MHDL-2022010027/2021	EPI_ISL_8388854	2021-12-15	North America / USA / Wisconsin / Milwaukee County	Human	Original	Nanopore Clear Dx	BIP-WV6	BA.1.15	21K	Omicron	GRA	(NSP5_P132H,Spike_H69del,Spike_T95I,Spike_A67V,NSP6_S106del,Spike_N969K,Spike_H655Y,Spike_N856K,N_R203K,Spike_G142D,NSP3_A1892T,Spike_Q954H,Spike_G339D,NS3_L106F,N_P13L,NSP3_L1266I,N_R32del,NSP3_S1265del,NSP14_I42V,Spike_P681H,Spike_Y144del,M_Q19E,N_S33del,NSP4_T492I,NSP6_L105del,Spike_N679K,Spike_N764K,NSP6_G107del,N_E31del,NSP3_K38R,NSP6_I189V,Spike_T547K,M_D3G,Spike_D796Y,N_G204R,N_D343G,E_T9I…
hCoV-19/USA/WI-MHDL-2022010018/2021	EPI_ISL_8388866	2021-12-15	North America / USA / Wisconsin / Milwaukee County	Human	Original	Nanopore Clear Dx	BIP-WV6	BA.1.15	21K	Omicron	GRA	(NSP5_P132H,Spike_H69del,Spike_T95I,Spike_A67V,NSP6_S106del,Spike_N969K,Spike_H655Y,Spike_N856K,N_R203K,Spike_G142D,NSP3_A1892T,NSP14_L177F,Spike_Q954H,Spike_G339D,NS3_L106F,N_P13L,NSP3_L1266I,N_R32del,NSP3_S1265del,NSP14_I42V,Spike_P681H,Spike_Y144del,M_Q19E,N_S33del,NSP4_T492I,NSP6_L105del,Spike_N679K,Spike_N764K,NSP6_G107del,N_E31del,NSP3_K38R,NSP6_I189V,Spike_T547K,Spike_D796Y,N_G204R,N_D343G…
hCoV-19/USA/WI-MHDL-2022010169/2021	EPI_ISL_8565365	2021-12-16	North America / USA / Wisconsin / Milwaukee County	Human	Original	Illumina MiSeq	DRAGEN COVID lineage v3.5.5	BA.1.1.18	21K	Omicron	GRA	(NSP5_P132H,Spike_H69del,Spike_T95I,Spike_A67V,Spike_S373P,Spike_Q493R,Spike_N969K,Spike_H655Y,Spike_N856K,N_R203K,Spike_G142D,NSP3_A1892T,Spike_Q954H,N_P13L,NSP3_L1266I,Spike_N501Y,N_R32del,M_Q19E,Spike_N440K,NSP4_T492I,NSP6_L105del,Spike_N679K,Spike_N764K,Spike_L212I,NSP6_G107del,Spike_Y505H,Spike_R346K,NSP6_I189V,Spike_T547K,M_D3G,Spike_D796Y,N_G204R,Spike_T478K,Spike_V143del,M_A63T,Spike_G496…
hCoV-19/USA/WI-MHDL-2022010170/2021	EPI_ISL_8565366	2021-12-16	North America / USA / Wisconsin / Milwaukee County	Human	Original	Illumina MiSeq	DRAGEN COVID lineage v3.5.5	BA.1.1	21K	Omicron	GRA	(NSP5_P132H,Spike_H69del,Spike_T95I,Spike_A67V,Spike_S373P,Spike_Q493R,Spike_N969K,Spike_H655Y,Spike_N856K,N_R203K,Spike_G142D,NSP3_A1892T,Spike_Q954H,N_P13L,NSP3_L1266I,Spike_N501Y,N_R32del,M_Q19E,Spike_N440K,NSP4_T492I,NSP6_L105del,Spike_N679K,Spike_N764K,Spike_L212I,NSP6_G107del,Spike_Y505H,Spike_R346K,NSP6_I189V,Spike_T547K,M_D3G,Spike_D796Y,N_G204R,Spike_T478K,Spike_V143del,M_A63T,Spike_G496…
hCoV-19/USA/WI-MHDL-2022010171/2021	EPI_ISL_8565367	2021-12-16	North America / USA / Wisconsin / Milwaukee County	Human	Original	Illumina MiSeq	DRAGEN COVID lineage v3.5.5	AY.4	21J	Delta	GK	(N_G215C,NSP3_A1711V,Spike_T95I,N_D63G,N_R203M,NSP12_G671S,NSP3_H295Y,Spike_G142D,NS3_S26L,NSP2_T429I,Spike_P681R,Spike_R158del,Spike_T572I,NS7a_V82A,NSP3_A488S,Spike_F157del,NSP4_T492I,NSP14_A394V,Spike_T19R,NS7a_T120I,N_D377Y,M_I82T,Spike_D950N,NS7b_T40I,NSP13_P77L,NSP4_V94A,Spike_E156G,NSP3_P1469S,Spike_T478K,NSP6_T77A,NSP12_P323L,Spike_D614G,NSP4_V167L,Spike_L452R,NSP2_P91L)
hCoV-19/USA/WI-MHDL-2022010180/2021	EPI_ISL_8565373	2021-12-16	North America / USA / Wisconsin / Milwaukee County	Human	Original	Illumina MiSeq	DRAGEN COVID lineage v3.5.5	BA.1.17	21K	Omicron	GRA	(NSP5_P132H,Spike_H69del,Spike_T95I,Spike_A67V,Spike_S373P,Spike_Q493R,Spike_N969K,Spike_H655Y,Spike_N856K,N_R203K,Spike_G142D,NSP3_A1892T,Spike_Q954H,N_P13L,NSP3_L1266I,Spike_N501Y,N_R32del,M_Q19E,NSP4_T492I,NSP6_L105del,Spike_N679K,Spike_N764K,Spike_L212I,NSP6_G107del,Spike_Y505H,NSP6_I189V,NSP12_D499N,Spike_T547K,M_D3G,Spike_D796Y,N_G204R,Spike_T478K,Spike_V143del,M_A63T,Spike_G496S,NSP3_V1069…
hCoV-19/USA/WI-MHDL-2022010179/2021	EPI_ISL_8593660	2021-12-16	North America / USA / Wisconsin / Milwaukee County	Human	Original	Illumina MiSeq	DRAGEN COVID lineage v3.5.5	BA.1.20	21K	Omicron	GRA	(NSP5_P132H,Spike_H69del,Spike_T95I,Spike_A67V,Spike_S373P,Spike_Q493R,Spike_N969K,Spike_H655Y,Spike_N856K,N_R203K,Spike_G142D,NSP3_A1892T,Spike_Q954H,N_P13L,NSP3_L1266I,Spike_N501Y,N_R32del,M_Q19E,NSP4_T492I,NSP6_L105del,Spike_N679K,Spike_N764K,Spike_L212I,NSP6_G107del,Spike_Y505H,NSP6_I189V,Spike_T547K,M_D3G,Spike_D796Y,N_G204R,Spike_T478K,Spike_V143del,M_A63T,Spike_G496S,NSP6_S106del,N_P67S,Sp…
hCoV-19/USA/WI-MHDL-2022010181/2021	EPI_ISL_8593661	2021-12-16	North America / USA / Wisconsin / Milwaukee County	Human	Original	Illumina MiSeq	DRAGEN COVID lineage v3.5.5	BA.1.20	21K	Omicron	GRA	(NSP5_P132H,Spike_H69del,Spike_T95I,Spike_A67V,Spike_S373P,Spike_Q493R,Spike_N969K,Spike_H655Y,Spike_N856K,N_R203K,Spike_G142D,NSP3_A1892T,Spike_Q954H,N_P13L,NSP3_L1266I,Spike_N501Y,N_R32del,M_Q19E,NSP4_T492I,NSP6_L105del,Spike_N679K,Spike_N764K,Spike_L212I,NSP6_G107del,Spike_Y505H,NSP6_I189V,Spike_T547K,M_D3G,Spike_D796Y,N_G204R,Spike_T478K,Spike_V143del,M_A63T,Spike_G496S,NSP6_S106del,N_P67S,Sp…
hCoV-19/USA/WI-MHDL-2021120501/2021	EPI_ISL_8185127	2021-12-16	North America / USA / Wisconsin / Milwaukee County	Human	Original	Nanopore Clear Dx	BIP-WV6	AY.103	21J	Delta	GK	(N_G215C,N_D63G,N_R203M,NSP12_G671S,NSP13_I334V,NS3_S26L,Spike_P681R,Spike_R158del,NSP3_P1228L,NS7a_V82A,NSP3_A488S,Spike_F157del,NSP4_T492I,NSP14_A394V,Spike_T19R,NS7a_T120I,N_D377Y,Spike_F4Y,M_I82T,Spike_D950N,NS7b_S31L,NS7b_T40I,NSP13_P77L,Spike_E156G,NSP13_P504S,NSP3_P1469S,Spike_T478K,NSP6_T77A,NSP12_P323L,Spike_D614G,Spike_L452R,NSP4_V167L)
hCoV-19/USA/WI-MHDL-2021120502/2021	EPI_ISL_8185128	2021-12-16	North America / USA / Wisconsin / Milwaukee County	Human	Original	Nanopore Clear Dx	BIP-WV6	BA.1.20	21K	Omicron	GRA	(NSP5_P132H,Spike_H69del,Spike_T95I,Spike_A67V,Spike_Q493R,Spike_N969K,Spike_H655Y,Spike_N856K,N_R203K,Spike_G142D,NSP3_A1892T,Spike_Q954H,N_P13L,NSP3_L1266I,Spike_N501Y,N_R32del,M_Q19E,Spike_N440K,NSP4_T492I,NSP6_L105del,Spike_N679K,Spike_N764K,Spike_L212I,NSP6_G107del,Spike_Y505H,NSP6_I189V,Spike_T547K,M_D3G,Spike_D796Y,N_G204R,Spike_T478K,Spike_V143del,M_A63T,Spike_G496S,NSP6_S106del,N_P67S,Sp…
hCoV-19/USA/WI-MHDL-2021120503/2021	EPI_ISL_8185129	2021-12-16	North America / USA / Wisconsin / Milwaukee County	Human	Original	Nanopore Clear Dx	BIP-WV6	AY.100	21J	Delta	GK	(N_G215C,N_D63G,N_R203M,NSP12_G671S,NSP2_T223I,NS3_S26L,NSP3_P192H,NSP13_A296S,Spike_P681R,Spike_R158del,NSP3_P1228L,NS7a_V82A,NSP3_A488S,Spike_F157del,NSP4_T492I,NSP14_A394V,Spike_T19R,NS7a_T120I,N_D377Y,M_I82T,Spike_D950N,N_Q9K,Spike_M1237I,NS7b_T40I,NSP13_P77L,Spike_E156G,NSP15_V294A,NSP3_P1469S,Spike_T478K,Spike_A1016V,NSP6_T77A,NSP12_P323L,Spike_D614G,NSP4_V167L,Spike_L452R)
hCoV-19/USA/WI-MHDL-2022010020/2021	EPI_ISL_8388841	2021-12-17	North America / USA / Wisconsin / Milwaukee County	Human	Original	Nanopore Clear Dx	BIP-WV6	AY.103	21J	Delta	GK	(N_G215C,N_D63G,N_R203M,NSP12_G671S,NSP13_I334V,NS3_S26L,Spike_P681R,Spike_R158del,NSP3_P1228L,NS7a_V82A,NSP3_A488S,Spike_F157del,NSP4_T492I,NSP14_A394V,Spike_T19R,NS7a_T120I,N_D377Y,M_I82T,Spike_D950N,NS7b_S31L,NS7b_T40I,NSP13_P77L,Spike_E156G,NSP10_T39I,NSP3_P1469S,Spike_T478K,NSP6_T77A,NSP12_P323L,Spike_D614G,Spike_L452R,NSP4_V167L)
hCoV-19/USA/WI-MHDL-2022010022/2021	EPI_ISL_8388842	2021-12-17	North America / USA / Wisconsin / Milwaukee County	Human	Original	Nanopore Clear Dx	BIP-WV6	AY.44	21J	Delta	GK	(NSP3_T1275I,N_G215C,N_D63G,N_R203M,M_S214T,NSP12_G671S,NSP1_D147A,NS3_S26L,Spike_P681R,Spike_R158del,NSP3_P1228L,NSP3_I1911M,NS7a_V82A,NSP3_A488S,Spike_F157del,NSP4_T492I,NSP12_K780N,NSP14_A394V,Spike_T19R,NS7a_T120I,NSP12_F192V,N_D377Y,M_I82T,Spike_D950N,NS7b_T40I,NSP3_A1736V,NSP13_P77L,Spike_E156G,NSP3_P1469S,Spike_T478K,NSP15_V172L,NSP6_T77A,NSP12_P323L,Spike_D614G,NSP4_V167L,Spike_L452R)
hCoV-19/USA/WI-MHDL-2022010023/2021	EPI_ISL_8388844	2021-12-17	North America / USA / Wisconsin / Milwaukee County	Human	Original	Nanopore Clear Dx	BIP-WV6	AY.103	21J	Delta	GK	(N_G215C,N_R203M,NSP12_G671S,NSP13_I334V,NSP4_H313Y,NS3_W45del,NS3_G44del,NSP3_P1228L,NS3_P42del,NS7a_V82A,NS8_P36S,NSP4_T492I,Spike_T19R,NS7a_T120I,NS3_S40del,M_I82T,Spike_D950N,NS3_A39del,NS7b_T40I,NSP3_P1469S,NSP3_S1877N,Spike_T478K,NS3_F43del,NSP6_T77A,NS3_I47del,N_D63G,NS3_L46del,NSP14_L157F,NS3_S26L,Spike_P681R,Spike_R158del,NSP2_I560V,NS3_Q38del,Spike_F157del,NSP3_A488S,NSP1_G94C,NSP14_A39…
hCoV-19/USA/WI-MHDL-2022010025/2021	EPI_ISL_8388849	2021-12-17	North America / USA / Wisconsin / Milwaukee County	Human	Original	Nanopore Clear Dx	BIP-WV6	BA.1.20	21K	Omicron	GRA	(NSP5_P132H,Spike_H69del,Spike_T95I,Spike_A67V,Spike_Q493R,Spike_N969K,Spike_H655Y,Spike_N856K,N_R203K,Spike_G142D,NSP3_A1892T,Spike_Q954H,N_P13L,NSP3_L1266I,Spike_N501Y,N_R32del,M_Q19E,Spike_N440K,NSP4_T492I,NSP6_L105del,Spike_N679K,Spike_N764K,NSP6_G107del,Spike_Y505H,NSP6_I189V,Spike_T547K,M_D3G,Spike_D796Y,N_G204R,Spike_T478K,Spike_V143del,M_A63T,Spike_G496S,NSP6_S106del,N_P67S,Spike_G339D,NS…
hCoV-19/USA/WI-MHDL-2022010024/2021	EPI_ISL_8388853	2021-12-17	North America / USA / Wisconsin / Milwaukee County	Human	Original	Nanopore Clear Dx	BIP-WV6	BA.1.15	21K	Omicron	GRA	(NSP5_P132H,Spike_H69del,Spike_T95I,Spike_A67V,NSP6_S106del,Spike_N969K,Spike_H655Y,Spike_N856K,N_R203K,Spike_G142D,NSP3_A1892T,Spike_Q954H,NS3_L106F,N_P13L,NSP3_L1266I,N_R32del,NSP3_S1265del,NSP14_I42V,Spike_P681H,Spike_Y144del,M_Q19E,N_S33del,NSP4_T492I,NSP6_L105del,Spike_N679K,NSP12_P94L,Spike_N764K,NSP12_R197Q,NSP6_G107del,N_E31del,NSP3_K38R,NSP6_I189V,Spike_T547K,M_D3G,Spike_D796Y,N_G204R,N_…
hCoV-19/USA/WI-MHDL-2022010021/2021	EPI_ISL_8388867	2021-12-17	North America / USA / Wisconsin / Milwaukee County	Human	Original	Nanopore Clear Dx	BIP-WV6	BA.1.1.18	21K	Omicron	GRA	(NSP5_P132H,Spike_H69del,Spike_T95I,Spike_A67V,NSP6_S106del,Spike_N969K,Spike_H655Y,Spike_N856K,N_R203K,Spike_G142D,NSP3_A1892T,Spike_Q954H,Spike_G339D,N_P13L,NSP3_L1266I,N_R32del,NSP3_S1265del,NSP14_I42V,Spike_P681H,Spike_Y144del,M_Q19E,N_S33del,NSP4_T492I,NSP6_L105del,Spike_N679K,Spike_N764K,NSP3_A1736V,NSP6_G107del,N_E31del,NSP3_K38R,Spike_R346K,NSP6_I189V,Spike_T547K,Spike_D796Y,N_G204R,Spike…
hCoV-19/USA/WI-MHDL-2022010077/2021	EPI_ISL_8477776	2021-12-17	North America / USA / Wisconsin / Milwaukee County	Human	Original	Nanopore Clear Dx	BIP-WV6	BA.1	21K	Omicron	GRA	(NSP5_P132H,Spike_H69del,Spike_T95I,Spike_A67V,NSP6_S106del,Spike_N969K,Spike_H655Y,Spike_N856K,N_R203K,Spike_G142D,NSP3_A1892T,Spike_Q954H,Spike_G339D,N_P13L,NSP3_L1266I,N_R32del,NSP3_S1265del,NSP14_I42V,Spike_P681H,Spike_Y144del,M_Q19E,N_S33del,NSP4_T492I,NSP6_L105del,Spike_N679K,Spike_N764K,NSP6_G107del,N_E31del,NSP3_K38R,NSP6_I189V,Spike_T547K,Spike_D796Y,N_G204R,Spike_V70del,Spike_L981F,Spik…
hCoV-19/USA/WI-MHDL-2022010076/2021	EPI_ISL_8483086	2021-12-17	North America / USA / Wisconsin / Milwaukee County	Human	Original	Nanopore Clear Dx	BIP-WV6	BA.1.20	21K	Omicron	GRA	(NSP5_P132H,Spike_H69del,Spike_T95I,Spike_A67V,NSP6_S106del,Spike_N969K,Spike_H655Y,Spike_N856K,N_P67S,N_R203K,Spike_G142D,NSP3_A1892T,Spike_Q954H,Spike_G339D,N_P13L,NSP3_L1266I,N_R32del,NSP3_S1265del,NSP14_I42V,Spike_P681H,Spike_Y144del,M_Q19E,N_S33del,NSP4_T492I,NSP6_L105del,Spike_N679K,Spike_N764K,NSP6_G107del,N_E31del,NSP3_K38R,NSP6_I189V,Spike_T547K,M_D3G,Spike_D796Y,N_G204R,E_T9I,Spike_V70d…
hCoV-19/USA/WI-MHDL-2022010182/2021	EPI_ISL_8565374	2021-12-19	North America / USA / Wisconsin / Milwaukee County	Human	Original	Illumina MiSeq	DRAGEN COVID lineage v3.5.5	AY.103	21J	Delta	GK	(N_P365T,N_G215C,N_D63G,N_R203M,NSP12_G671S,NSP13_I334V,NSP4_G309R,Spike_G142D,NS3_S26L,Spike_P681R,Spike_R158del,NS7a_V82A,NSP3_A488S,Spike_F157del,NSP4_T492I,NSP14_A394V,Spike_T19R,NS7a_T120I,N_D377Y,M_I82T,Spike_D950N,NS7b_T40I,NSP13_P77L,Spike_E156G,NSP3_P1469S,Spike_T478K,NSP6_T77A,NSP12_P323L,Spike_D614G,Spike_L452R,NSP4_V167L,NSP6_V149F)
hCoV-19/USA/WI-MHDL-2022010429/2021	EPI_ISL_8879299	2021-12-20	North America / USA / Wisconsin / Milwaukee County	Human	Original	Illumina MiSeq	DRAGEN COVID lineage v3.5.6	BA.1	21K	Omicron	GRA	(NSP5_P132H,Spike_H69del,Spike_T95I,Spike_A67V,Spike_S373P,Spike_Q493R,Spike_N969K,Spike_H655Y,Spike_N856K,N_R203K,Spike_G142D,NSP3_A1892T,Spike_Q954H,N_P13L,NSP3_L1266I,Spike_N501Y,N_R32del,M_Q19E,Spike_N440K,NSP4_T492I,NSP6_L105del,Spike_N679K,Spike_N764K,Spike_L212I,NSP6_G107del,Spike_Y505H,NSP6_I189V,Spike_T547K,M_D3G,Spike_D796Y,N_G204R,Spike_T478K,Spike_V143del,M_A63T,Spike_G496S,Spike_K417…
hCoV-19/USA/WI-MHDL-2022010430/2021	EPI_ISL_8879300	2021-12-20	North America / USA / Wisconsin / Milwaukee County	Human	Original	Illumina MiSeq	DRAGEN COVID lineage v3.5.6	AY.103	21J	Delta	GK	(N_G215C,Spike_V1264L,N_D63G,N_R203M,NSP12_G671S,NSP13_I334V,Spike_G142D,NS3_S26L,Spike_P681R,Spike_R158del,NS7a_V82A,NSP3_A488S,Spike_F157del,NSP4_T492I,NSP14_A394V,Spike_T19R,NS7a_T120I,N_D377Y,NSP3_S126L,M_I82T,Spike_D950N,NS7b_T40I,NSP13_P77L,NSP13_D466E,NS3_P240L,Spike_E156G,NSP3_P1469S,Spike_T478K,NSP6_T77A,NSP12_P323L,Spike_D614G,NSP4_V167L)
hCoV-19/USA/WI-MHDL-2022010490/2021	EPI_ISL_8879359	2021-12-20	North America / USA / Wisconsin / Kenosha County	Human	Original	Illumina MiSeq	DRAGEN COVID lineage v3.5.6	BA.1.15	21K	Omicron	GRA	(NSP5_P132H,Spike_H69del,Spike_T95I,Spike_A67V,Spike_S373P,Spike_Q493R,Spike_N969K,Spike_H655Y,Spike_N856K,N_R203K,Spike_G142D,NSP3_A1892T,Spike_Q954H,NS3_L106F,N_P13L,NSP3_L1266I,Spike_N501Y,N_R32del,M_Q19E,NSP4_T492I,NSP6_L105del,Spike_N679K,Spike_N764K,Spike_L212I,NSP6_G107del,Spike_Y505H,NSP6_I189V,Spike_T547K,M_D3G,Spike_D796Y,N_G204R,N_D343G,Spike_T478K,Spike_V143del,M_A63T,Spike_G496S,NSP6…
hCoV-19/USA/WI-MHDL-2022010491/2021	EPI_ISL_8879360	2021-12-20	North America / USA / Wisconsin / Milwaukee County	Human	Original	Illumina MiSeq	DRAGEN COVID lineage v3.5.6	BA.1.20	21K	Omicron	GRA	(NSP5_P132H,Spike_H69del,Spike_T95I,Spike_A67V,Spike_S373P,Spike_Q493R,Spike_N969K,Spike_H655Y,Spike_N856K,N_R203K,Spike_G142D,NSP3_A1892T,Spike_Q954H,N_P13L,NSP3_L1266I,Spike_N501Y,N_R32del,M_Q19E,NSP4_T492I,NSP6_L105del,Spike_N679K,Spike_N764K,Spike_L212I,NSP6_G107del,Spike_Y505H,NSP6_I189V,Spike_T547K,M_D3G,Spike_D796Y,N_G204R,Spike_T478K,Spike_V143del,M_A63T,Spike_G496S,NSP6_S106del,N_P67S,Sp…
hCoV-19/USA/WI-MHDL-2022010492/2021	EPI_ISL_8879361	2021-12-20	North America / USA / Wisconsin / Milwaukee County	Human	Original	Illumina MiSeq	DRAGEN COVID lineage v3.5.6	AY.25	21J	Delta	GK	(N_G215C,N_D63G,N_R203M,NSP12_G671S,Spike_G142D,NSP2_P129L,NSP12_K91R,NS3_S26L,Spike_P681R,Spike_R158del,NSP3_P1228L,NS7a_V82A,NSP2_A360V,NSP3_A488S,Spike_F157del,NSP4_T492I,NSP14_A394V,Spike_T19R,NS7a_T120I,N_D377Y,M_I82T,Spike_D950N,Spike_S112L,NS7b_T40I,NSP13_P77L,Spike_E156G,NS8_A51V,Spike_P1162L,N_T247I,NSP3_P1469S,Spike_T478K,NSP6_T77A,NS3_E239Q,NSP3_T771I,NSP3_A465V,NSP12_P323L,Spike_D614G…
hCoV-19/USA/WI-MHDL-2022010493/2021	EPI_ISL_8879362	2021-12-20	North America / USA / Wisconsin / Milwaukee County	Human	Original	Illumina MiSeq	DRAGEN COVID lineage v3.5.6	AY.25	21J	Delta	GK	(N_G215C,N_D63G,N_R203M,NSP12_G671S,Spike_G142D,NSP2_P129L,NSP12_K91R,NS3_S26L,Spike_P681R,Spike_R158del,NSP3_P1228L,NS7a_V82A,NSP2_A360V,NSP3_A488S,Spike_F157del,NSP4_T492I,NSP14_A394V,Spike_T19R,NS7a_T120I,N_D377Y,M_I82T,Spike_D950N,Spike_S112L,NS7b_T40I,NSP13_P77L,Spike_E156G,NS8_A51V,Spike_P1162L,N_T247I,NSP3_P1469S,Spike_T478K,NSP6_T77A,NS3_E239Q,NSP3_T771I,NSP3_A465V,NSP12_P323L,Spike_D614G…
[truncated: 5,985 more rows]
