# Supplementary material for: Genomic Surveillance Reveals the Rapid Expansion of the XBB Lineage among Circulating SARS-CoV-2 Omicron Lineages in Southeastern Wisconsin, USA
Source: Viruses. 2023 Sep 16;15(9):1940. doi: 10.3390/v15091940 (PMC10535685; doi:10.3390/v15091940)
Supplement: Supplementary file 1 [file viruses-15-01940-s001.zip › Table_S2.xlsx]

## Sheet: Sheet1
Table S2 – Details of 8,229 SARS-CoV-2 genome sequences from Southeastern Wisconsin, Nov 2021 – Apr 2023. Refer to xlsx file.
seqName_full	seqName	GISAID_id	Date_of_collection	clade	Nextclade_pango	partiallyAliased	clade_nextstrain	clade_who	clade_legacy	qc.overallScore	qc.overallStatus	totalSubstitutions	totalDeletions	totalInsertions	totalFrameShifts	totalMissing	totalNonACGTNs	totalAminoacidSubstitutions	totalAminoacidDeletions	totalAminoacidInsertions	totalUnknownAa	alignmentScore	alignmentStart	alignmentEnd	coverage	isReverseComplement	substitutions	deletions	insertions	frameShifts	aaSubstitutions	aaDeletions	aaInsertions	privateNucMutations.reversionSubstitutions	privateNucMutations.labeledSubstitutions	privateNucMutations.unlabeledSubstitutions	privateNucMutations.totalReversionSubstitutions	privateNucMutations.totalLabeledSubstitutions	privateNucMutations.totalUnlabeledSubstitutions	privateNucMutations.totalPrivateSubstitutions	missing	unknownAaRanges	nonACGTNs	qc.missingData.missingDataThreshold	qc.missingData.score	qc.missingData.status	qc.missingData.totalMissing	qc.mixedSites.mixedSitesThreshold	qc.mixedSites.score
hCoV-19/USA/WI-MHDL-2021110221/2021|EPI_ISL_6594798|2021-11-01	hCoV-19/USA/WI-MHDL-2021110221/2021	EPI_ISL_6594798	2021-11-01	21J	AY.103	B.1.617.2.103	21J	Delta	21J (Delta)	8.50694	good	46	13	0	0	266	0	33	4	0	89	89207	39	29855	0.988229	false	G210T,C241T,T2827C,C3037T,T3115C,G4181T,C4276T,C6402T,C7124T,G8174A,C8814T,C8986T,G9053T,C10029T,C10802T,A11201G,A11332G,C11572T,C12624A,A13962G,C14408T,G15451A,C16466T,A17236G,C18946T,C19220T,C21618G,G21974C,G21987A,T22917G,C22995A,A23403G,C23604G,C24208T,G24410A,C25469T,T26767C,T27291C,T27638C,C27752T,C27874T,A28461G,G28881T,G28916T,G29402T,G29742T	22029-22034,28248-28253,28271			M:I82T,N:D63G,N:R203M,N:G215C,N:D377Y,ORF1a:A1306S,ORF1a:P2046L,ORF1a:P2287S,ORF1a:A2637T,ORF1a:A2850V,ORF1a:V2930L,ORF1a:T3255I,ORF1a:T3646A,ORF1a:P4120H,ORF1b:P314L,ORF1b:G662S,ORF1b:P1000L,ORF1b:I1257V,ORF1b:A1918V,ORF3a:S26L,ORF7a:V82A,ORF7a:T120I,ORF7b:T40I,ORF9b:T60A,S:T19R,S:D138H,S:G142D,S:R158G,S:L452R,S:T478K,S:D614G,S:P681R,S:D950N	ORF8:D119-,ORF8:F120-,S:E156-,S:F157-			T27291C|21J	T2827C,T3115C,C4276T,G8174A,C8814T,C10802T,C11572T,C12624A,A13962G,C18946T,G21974C	0	1	11	12	19292-19557	ORF1b:1942-2030		3000	0	good	266	10	0
hCoV-19/USA/WI-MHDL-2021110283/2021|EPI_ISL_6575756|2021-11-01	hCoV-19/USA/WI-MHDL-2021110283/2021	EPI_ISL_6575756	2021-11-01	21J	AY.25.1	B.1.617.2.25.1	21J	Delta	21J (Delta)	10.3112	good	39	7	0	0	1167	0	31	2	0	393	89156	55	29836	0.956927	false	G210T,C241T,C3037T,A3948G,G4181T,C6402T,C7124T,C7834T,A8621G,C8986T,G9053T,C10029T,A11201G,A11332G,G11562T,C14408T,G15451A,C16466T,C17285T,C19220T,T20571G,C21618G,G22335T,T22917G,C22995A,C23277T,A23403G,C23604G,G24410A,C25469T,G26107C,T26767C,C27874T,A28461G,G28881T,G28916T,G29402T,G29736T,G29742T	28248-28253,28271			M:I82T,N:D63G,N:R203M,N:G215C,N:D377Y,ORF1a:D1228G,ORF1a:A1306S,ORF1a:P2046L,ORF1a:P2287S,ORF1a:I2786V,ORF1a:V2930L,ORF1a:T3255I,ORF1a:T3646A,ORF1a:C3766F,ORF1b:P314L,ORF1b:G662S,ORF1b:P1000L,ORF1b:S1273L,ORF1b:A1918V,ORF3a:S26L,ORF3a:E239Q,ORF7b:T40I,ORF9b:T60A,S:T19R,S:W258L,S:L452R,S:T478K,S:T572I,S:D614G,S:P681R,S:D950N	ORF8:D119-,ORF8:F120-				C7834T,A8621G,C17285T,T20571G,G22335T,C23277T,G29736T	0	0	7	7	19276-19570,21717-22290,27507,27512-27808	ORF1b:1937-2035,ORF7a:38,ORF7a:40-122,ORF7b:1-18,S:52-243		3000	32.1111	mediocre	1167	10	0
hCoV-19/USA/WI-MHDL-2021110284/2021|EPI_ISL_6575752|2021-11-01	hCoV-19/USA/WI-MHDL-2021110284/2021	EPI_ISL_6575752	2021-11-01	21J	AY.25	B.1.617.2.25	21J	Delta	21J (Delta)	5.10444	good	40	13	0	0	867	0	30	4	0	293	89126	55	29836	0.96696	false	G210T,C241T,C337T,C823T,C3037T,T3478C,G4181T,G5539T,C6402T,C7124T,C8986T,G9053T,C9286T,C9693T,C10029T,A11201G,A11332G,C14408T,G15451A,C16466T,C19220T,C21618G,T22917G,C22995A,A23403G,C23604G,G24410A,C25469T,C25516T,G26107C,T26767C,T27462C,C27874T,C28000T,A28461G,G28881T,G28916T,G29402T,G29422T,G29742T	22029-22034,28248-28253,28271			M:I82T,N:D63G,N:R203M,N:G215C,N:D377Y,ORF1a:A1306S,ORF1a:Q1758H,ORF1a:P2046L,ORF1a:P2287S,ORF1a:V2930L,ORF1a:A3143V,ORF1a:T3255I,ORF1a:T3646A,ORF1b:P314L,ORF1b:G662S,ORF1b:P1000L,ORF1b:A1918V,ORF3a:S26L,ORF3a:P42S,ORF3a:E239Q,ORF7b:T40I,ORF8:P36L,ORF9b:T60A,S:T19R,S:R158G,S:L452R,S:T478K,S:D614G,S:P681R,S:D950N	ORF8:D119-,ORF8:F120-,S:E156-,S:F157-				C337T,C823T,T3478C,G5539T,C9286T,C9693T,C25516T,T27462C,C28000T,G29422T	0	0	10	10	19276-19570,21717-21990,27507,27512-27808	ORF1b:1937-2035,ORF7a:38,ORF7a:40-122,ORF7b:1-18,S:52-143		3000	21	good	867	10	0
hCoV-19/USA/WI-MHDL-2021110285/2021|EPI_ISL_6575753|2021-11-01	hCoV-19/USA/WI-MHDL-2021110285/2021	EPI_ISL_6575753	2021-11-01	21J	AY.25	B.1.617.2.25	21J	Delta	21J (Delta)	4.41	good	34	13	0	0	867	0	29	4	0	293	89150	55	29836	0.96696	false	G210T,C241T,G1148T,C3037T,G3871T,G4181T,C6402T,C7124T,C8986T,G9053T,G9332A,C10029T,A11201G,A11332G,C14408T,G15451A,C16466T,C19220T,C21618G,T22917G,C22995A,A23403G,C23604G,G24410A,T24491C,C25469T,G26107C,T26767C,C27874T,A28461G,G28881T,G28916T,G29402T,G29742T	22029-22034,28248-28253,28271			M:I82T,N:D63G,N:R203M,N:G215C,N:D377Y,ORF1a:G295C,ORF1a:K1202N,ORF1a:A1306S,ORF1a:P2046L,ORF1a:P2287S,ORF1a:V2930L,ORF1a:A3023T,ORF1a:T3255I,ORF1a:T3646A,ORF1b:P314L,ORF1b:G662S,ORF1b:P1000L,ORF1b:A1918V,ORF3a:S26L,ORF3a:E239Q,ORF7b:T40I,ORF9b:T60A,S:T19R,S:R158G,S:L452R,S:T478K,S:D614G,S:P681R,S:D950N	ORF8:D119-,ORF8:F120-,S:E156-,S:F157-				G1148T,G3871T,G9332A,T24491C	0	0	4	4	19276-19570,21717-21990,27507,27512-27808	ORF1b:1937-2035,ORF7a:38,ORF7a:40-122,ORF7b:1-18,S:52-143		3000	21	good	867	10	0
hCoV-19/USA/WI-MHDL-2021110429/2021|EPI_ISL_6861942|2021-11-01	hCoV-19/USA/WI-MHDL-2021110429/2021	EPI_ISL_6861942	2021-11-01	21J	AY.44	B.1.617.2.44	21J	Delta	21J (Delta)	29.3403	good	44	13	0	0	266	0	35	4	0	89	89209	39	29853	0.988162	false	G210T,C241T,C3037T,G4181T,C6040T,C6402T,C6638T,G7091T,C7124T,C7926T,C8986T,G9053T,C10029T,C10969T,A11201G,A11332G,T14014G,C14408T,G15451A,C16466T,C16726T,G18412A,C19220T,C21618G,G21987A,T22917G,C22995A,A23403G,C23604G,G24410A,C25469T,T26767C,T27638C,C27752T,C27874T,G28073T,G28460A,A28461G,G28881T,G28916T,G29402T,G29593T,A29700G,G29742T	22029-22034,28248-28253,28271			M:I82T,N:D63S,N:R203M,N:G215C,N:D377Y,ORF1a:A1306S,ORF1a:P2046L,ORF1a:H2125Y,ORF1a:V2276F,ORF1a:P2287S,ORF1a:A2554V,ORF1a:V2930L,ORF1a:T3255I,ORF1a:T3646A,ORF1b:F183V,ORF1b:P314L,ORF1b:G662S,ORF1b:P1000L,ORF1b:H1087Y,ORF1b:V1649I,ORF1b:A1918V,ORF3a:S26L,ORF7a:V82A,ORF7a:T120I,ORF7b:T40I,ORF8:L60F,ORF9b:T60A,S:T19R,S:G142D,S:R158G,S:L452R,S:T478K,S:D614G,S:P681R,S:D950N	ORF8:D119-,ORF8:F120-,S:E156-,S:F157-			C6638T|21J,C7926T|21J&21K,C16726T|21J,G28073T|21J	G7091T,C10969T,G18412A,G28460A,G29593T	0	4	5	9	19291-19556	ORF1b:1942-2030		3000	0	good	266	10	0
hCoV-19/USA/WI-MHDL-2021110430/2021|EPI_ISL_6864923|2021-11-01	hCoV-19/USA/WI-MHDL-2021110430/2021	EPI_ISL_6864923	2021-11-01	21J	AY.44	B.1.617.2.44	21J	Delta	21J (Delta)	8.50694	good	42	53	0	1	261	0	31	18	0	142	89076	39	29851	0.988262	false	G210T,C217T,C241T,C2706T,C3037T,G4181T,C6040T,C6402T,C7124T,C7926T,C8692T,C8986T,G9053T,C10029T,A11201G,A11332G,C13423T,T14014G,C14408T,A14912C,G15451A,C16466T,C19220T,T20631C,C21618G,G21987A,T22917G,C22995A,A23403G,C23604G,G24410A,C25469T,T26767C,T27638C,C27752T,C27874T,A28461G,G28881T,G28916T,G29402T,A29700G,G29742T	22029-22034,26159-26161,27556-27592,28248-28253,28271		ORF7a:68-122	M:I82T,N:D63G,N:R203M,N:G215C,N:D377Y,ORF1a:T814I,ORF1a:A1306S,ORF1a:P2046L,ORF1a:P2287S,ORF1a:A2554V,ORF1a:V2930L,ORF1a:T3255I,ORF1a:T3646A,ORF1b:F183V,ORF1b:P314L,ORF1b:N482T,ORF1b:G662S,ORF1b:P1000L,ORF1b:A1918V,ORF3a:S26L,ORF3a:N257D,ORF7b:T40I,ORF9b:T60A,S:T19R,S:G142D,S:R158G,S:L452R,S:T478K,S:D614G,S:P681R,S:D950N	ORF3a:V255-,ORF7a:A55-,ORF7a:L56-,ORF7a:T57-,ORF7a:C58-,ORF7a:F59-,ORF7a:S60-,ORF7a:T61-,ORF7a:Q62-,ORF7a:F63-,ORF7a:A64-,ORF7a:F65-,ORF7a:A66-,ORF7a:C67-,ORF8:D119-,ORF8:F120-,S:E156-,S:F157-			C7926T|21J&21K,C8692T|rec	C217T,C2706T,C13423T,A14912C,T20631C	0	2	5	7	19294-19554	ORF1b:1943-2029,ORF7a:68-122		3000	0	good	261	10	0
hCoV-19/USA/WI-MHDL-2021110431/2021|EPI_ISL_6861943|2021-11-01	hCoV-19/USA/WI-MHDL-2021110431/2021	EPI_ISL_6861943	2021-11-01	21J	AY.118	B.1.617.2.118	21J	Delta	21J (Delta)	8.50694	good	47	13	0	0	259	0	37	4	0	87	89200	39	29854	0.988429	false	G210T,C241T,T826C,C1415T,C3037T,G4181T,T5218C,C6402T,G6485T,C7124T,C8986T,G9053T,T9643C,C10029T,C10279T,A11201G,A11332G,C14408T,C15352T,G15451A,C16466T,G18583T,C19220T,C21618G,C21846T,G21987A,T22917G,C22995A,A23403G,C23604G,T23728C,G24410A,C25469T,C26527T,T26767C,A27338T,C27513T,T27638C,C27752T,C27874T,G28122T,A28461G,C28697T,G28881T,G28916T,G29402T,G29742T	22029-22034,28248-28253,28271			M:A2V,M:I82T,N:D63G,N:P142S,N:R203M,N:G215C,N:D377Y,ORF1a:L384F,ORF1a:A1306S,ORF1a:P2046L,ORF1a:D2074Y,ORF1a:P2287S,ORF1a:V2930L,ORF1a:T3255I,ORF1a:T3646A,ORF1b:P314L,ORF1b:L629F,ORF1b:G662S,ORF1b:P1000L,ORF1b:V1706L,ORF1b:A1918V,ORF3a:S26L,ORF6:E46V,ORF7a:V82A,ORF7a:T120I,ORF7b:T40I,ORF8:G77C,ORF9b:T60A,S:T19R,S:T95I,S:G142D,S:R158G,S:L452R,S:T478K,S:D614G,S:P681R,S:D950N	ORF8:D119-,ORF8:F120-,S:E156-,S:F157-			C27513T|22B	C1415T,T5218C,G6485T,T9643C,C10279T,C15352T,G18583T,T23728C,C26527T,G28122T,C28697T	0	1	11	12	19293-19551	ORF1b:1942-2028		3000	0	good	259	10	0
hCoV-19/USA/WI-MHDL-2021110432/2021|EPI_ISL_6861944|2021-11-01	hCoV-19/USA/WI-MHDL-2021110432/2021	EPI_ISL_6861944	2021-11-01	21J	AY.25	B.1.617.2.25	21J	Delta	21J (Delta)	25	good	41	13	0	0	264	0	33	4	0	88	89215	39	29851	0.988162	false	G210T,C241T,C3037T,G4181T,C6402T,C7124T,C8626T,C8986T,G9053T,C10029T,A11201G,A11332G,C11916T,C14408T,G15451A,C16466T,C17010T,C19220T,C21618G,C21897T,G21987A,T22917G,C22995A,A23403G,C23604G,G24410A,C25469T,G26107C,T26767C,A27507C,T27638C,C27752T,C27874T,A28461G,G28881A,G28882A,G28883C,G28916T,G29243T,G29402T,G29742T	22029-22034,28248-28253,28271			M:I82T,N:D63G,N:R203K,N:G204R,N:G215C,N:V324F,N:D377Y,ORF1a:A1306S,ORF1a:P2046L,ORF1a:P2287S,ORF1a:V2930L,ORF1a:T3255I,ORF1a:T3646A,ORF1a:S3884L,ORF1b:P314L,ORF1b:G662S,ORF1b:P1000L,ORF1b:A1918V,ORF3a:S26L,ORF3a:E239Q,ORF7a:V82A,ORF7a:T120I,ORF7b:T40I,ORF9b:T60A,S:T19R,S:S112L,S:G142D,S:R158G,S:L452R,S:T478K,S:D614G,S:P681R,S:D950N	ORF8:D119-,ORF8:F120-,S:E156-,S:F157-			C21897T|21J,T28881A|21K&21L&22B&20I&22E&22C&20B&23A&22A&22D&20J&22F&rec&20D&20F&21G&23B&21M&21E,G28882A|21K&21L&22B&20I&22E&22C&20B&23A&22A&22D&20J&22F&rec&20F&20D&21G&23B&21M&21E,G28883C|21K&21L&22B&20I&22E&22C&20B&23A&22A&22D&20J&22F&rec&20D&20F&21G&23B&21M&21E	C8626T,C11916T,C17010T,G29243T	0	4	4	8	19294-19557	ORF1b:1943-2030		3000	0	good	264	10	0
hCoV-19/USA/WI-MHDL-2021110434/2021|EPI_ISL_6861946|2021-11-01	hCoV-19/USA/WI-MHDL-2021110434/2021	EPI_ISL_6861946	2021-11-01	21J	AY.25	B.1.617.2.25	21J	Delta	21J (Delta)	14.0625	good	38	13	0	0	274	0	32	4	0	93	89230	39	29852	0.987861	false	G210T,C241T,C1568T,C3037T,G4181T,C6402T,C7124T,C8986T,G9053T,C10029T,A11201G,A11332G,G12801A,C14408T,G15451A,C16466T,C19220T,C19586T,C21618G,G21987A,G22801T,T22917G,C22995A,A23403G,C23604G,G24410A,C25469T,G25785C,G26107C,T26767C,A27507C,T27638C,C27874T,A28461G,G28881T,G28916T,G29402T,G29742T	22029-22034,28248-28253,28271			M:I82T,N:D63G,N:R203M,N:G215C,N:D377Y,ORF1a:H435Y,ORF1a:A1306S,ORF1a:P2046L,ORF1a:P2287S,ORF1a:V2930L,ORF1a:T3255I,ORF1a:T3646A,ORF1a:R4179K,ORF1b:P314L,ORF1b:G662S,ORF1b:P1000L,ORF1b:A1918V,ORF1b:T2040I,ORF3a:S26L,ORF3a:W131C,ORF3a:E239Q,ORF7a:V82A,ORF7b:T40I,ORF9b:T60A,S:T19R,S:G142D,S:R158G,S:L452R,S:T478K,S:D614G,S:P681R,S:D950N	ORF8:D119-,ORF8:F120-,S:E156-,S:F157-		T27752C	G12801A|21J,G22801T|21J	C1568T,C19586T,G25785C	1	2	3	6	19293-19553,21163-21175	ORF1b:1942-2029,ORF1b:2566-2570		3000	0	good	274	10	0
hCoV-19/USA/WI-MHDL-2021110457/2021|EPI_ISL_6861966|2021-11-01	hCoV-19/USA/WI-MHDL-2021110457/2021	EPI_ISL_6861966	2021-11-01	21J	AY.113	B.1.617.2.113	21J	Delta	21J (Delta)	2.77778	good	49	13	0	0	263	0	36	4	0	88	89195	39	29855	0.988329	false	G210T,C241T,C3037T,G4181T,C6402T,C7124T,A7444G,C8986T,G9053T,C9165T,T9535C,C10029T,A10323G,A11201G,A11332G,A12772G,C13115T,C14230T,C14408T,C14471T,C15240T,G15451A,C16466T,C17676T,C19220T,A19865G,A19892G,T21291C,C21618G,C21846T,G21987A,T22917G,C22995A,A23403G,C23604G,G24410A,C25469T,C25578T,T26767C,T27638C,C27752T,C27874T,G27990T,A28461G,G28881T,G28916T,T29068C,G29402T,G29742T	22029-22034,28248-28253,28271			M:I82T,N:D63G,N:R203M,N:G215C,N:D377Y,ORF1a:A1306S,ORF1a:P2046L,ORF1a:P2287S,ORF1a:V2930L,ORF1a:T2967I,ORF1a:T3255I,ORF1a:K3353R,ORF1a:T3646A,ORF1b:P255S,ORF1b:P314L,ORF1b:T335I,ORF1b:G662S,ORF1b:P1000L,ORF1b:A1918V,ORF1b:N2133S,ORF1b:D2142G,ORF3a:S26L,ORF7a:V82A,ORF7a:T120I,ORF7b:T40I,ORF8:V33F,ORF9b:T60A,S:T19R,S:T95I,S:G142D,S:R158G,S:L452R,S:T478K,S:D614G,S:P681R,S:D950N	ORF8:D119-,ORF8:F120-,S:E156-,S:F157-				A7444G,T9535C,C13115T,C14230T,C14471T,C17676T,A19865G,A19892G,T21291C,C25578T,G27990T,T29068C	0	0	12	12	19294-19556	ORF1b:1943-2030		3000	0	good	263	10	0
hCoV-19/USA/WI-MHDL-2021110458/2021|EPI_ISL_6861967|2021-11-01	hCoV-19/USA/WI-MHDL-2021110458/2021	EPI_ISL_6861967	2021-11-01	21J	AY.44	B.1.617.2.44	21J	Delta	21J (Delta)	85.4913	mediocre	36	7	0	0	2669	0	27	2	0	922	89216	39	29836	0.907233	false	G210T,C241T,C3037T,G4181T,C6040T,C6402T,C8986T,G9053T,C10029T,A11201G,A11332G,C13517T,T14014G,C14408T,G15451A,G15907T,C16466T,T18672C,C19220T,C21618G,T22917G,C22995A,A23403G,C23604G,G24410A,C25469T,G25785T,C26228T,T26767C,C27874T,G28028T,A28461G,G28881T,G28916T,A29700G,G29742T	28248-28253,28271			M:I82T,N:D63G,N:R203M,N:G215C,ORF1a:A1306S,ORF1a:P2046L,ORF1a:V2930L,ORF1a:T3255I,ORF1a:T3646A,ORF1b:T17I,ORF1b:F183V,ORF1b:P314L,ORF1b:G662S,ORF1b:G814C,ORF1b:P1000L,ORF1b:A1918V,ORF3a:S26L,ORF3a:W131C,ORF7b:T40I,ORF8:W45C,ORF9b:T60A,S:T19R,S:L452R,S:T478K,S:D614G,S:P681R,S:D950N	ORF8:D119-,ORF8:F120-		A21987G	G25785T|20I	C13517T,G15907T,T18672C,C26228T,G28028T	1	1	5	7	1641-1777,1791,1805-1875,2278-2290,2573-2592,2786-2800,2806-2813,2819-2839,2844-2846,2848,3694-3695,3701,3715-3734,5057,5091-5127,5149-5166,5261-5267,6864-6907,6921-6937,6983-7004,7018-7047,7062-7070,7076-7091,7118-7170,7183-7215,7222-7320,8651-8652,8654-8659,16201-16208,16221-16234,16237-16238,16247-16250,16263-16273,16287-16290,16359-16388,16402-16407,16421-16424,19294-19365,19379-19547,19929-1…	E:17-18,E:21-28,M:1-4,N:367-378,ORF1a:459-504,ORF1a:509,ORF1a:514-537,ORF1a:671-675,ORF1a:770-776,ORF1a:841-845,ORF1a:847-850,ORF1a:852-858,ORF1a:860-861,ORF1a:1143-1144,ORF1a:1146,ORF1a:1150-1157,ORF1a:1598,ORF1a:1609-1621,ORF1a:1628-1634,ORF1a:1666-1668,ORF1a:2200-2214,ORF1a:2219-2224,ORF1a:2240-2247,ORF1a:2251-2261,ORF1a:2266-2269,ORF1a:2271-2276,ORF1a:2285-2302,ORF1a:2306-2317,ORF1a:2319-2352…		3000	87.7407	mediocre	2669	10	0
hCoV-19/USA/WI-MHDL-2021110459/2021|EPI_ISL_6861968|2021-11-01	hCoV-19/USA/WI-MHDL-2021110459/2021	EPI_ISL_6861968	2021-11-01	21J	B.1.617.2	B.1.617.2	21J	Delta	21J (Delta)	14.2803	good	44	13	0	0	426	0	34	4	0	148	88993	39	29781	0.980403	false	G210T,C241T,C1929T,C3037T,G4181T,C6402T,C7124T,C8986T,G9053T,C9264T,C10029T,A11201G,A11332G,G13309A,C14408T,G15451A,C16466T,C17004T,C19220T,C21618G,A21630G,C21846T,G21987A,T22917G,C22995A,A23403G,C23604G,G24410A,C25469T,T25676C,C26022T,T26767C,G26828T,G27604A,T27638C,C27684T,C27752T,C27874T,A28461G,G28881T,G28916T,C29311T,G29402T,G29742T	22029-22034,28248-28253,28271			M:I82T,N:D63G,N:R203M,N:G215C,N:D377Y,ORF1a:A555V,ORF1a:A1306S,ORF1a:P2046L,ORF1a:P2287S,ORF1a:V2930L,ORF1a:T3000I,ORF1a:T3255I,ORF1a:T3646A,ORF1b:P314L,ORF1b:G662S,ORF1b:P1000L,ORF1b:A1918V,ORF3a:S26L,ORF3a:L95S,ORF7a:V71I,ORF7a:V82A,ORF7a:T120I,ORF7b:T40I,ORF9b:T60A,S:T19R,S:Q23R,S:T95I,S:G142D,S:R158G,S:L452R,S:T478K,S:D614G,S:P681R,S:D950N	ORF8:D119-,ORF8:F120-,S:E156-,S:F157-			G27604A|21J,C29311T|21G	C1929T,C9264T,G13309A,C17004T,A21630G,T25676C,C26022T,G26828T,C27684T	0	2	9	11	19298-19317,19327-19553,21163-21166,21171-21182,21248-21319,21340-21366,21431-21432,21434-21437,21442-21448,21451-21500,21514	ORF1b:1944-1950,ORF1b:1954-2029,ORF1b:2566-2572,ORF1b:2594-2618,ORF1b:2625-2633,ORF1b:2655-2657,ORF1b:2659-2678,ORF1b:2683		3000	4.66667	good	426	10	0
hCoV-19/USA/WI-MHDL-2021110461/2021|EPI_ISL_6861969|2021-11-01	hCoV-19/USA/WI-MHDL-2021110461/2021	EPI_ISL_6861969	2021-11-01	21J	AY.103	B.1.617.2.103	21J	Delta	21J (Delta)	133.623	bad	31	7	0	0	3114	0	23	2	0	1090	89236	39	29836	0.892352	false	G210T,C241T,C3037T,G4181T,C5672T,C6402T,C8986T,G9053T,C10029T,A11201G,A11332G,C11572T,C12624A,C14408T,G15451A,A17236G,C19220T,C21618G,A23403G,C23604G,C24208T,G24410A,C25469T,T26767C,T27291C,C27874T,A28461G,G28881T,G28916T,C29085T,G29742T	28248-28253,28271			M:I82T,N:D63G,N:R203M,N:G215C,N:T271I,ORF1a:A1306S,ORF1a:P1803S,ORF1a:P2046L,ORF1a:V2930L,ORF1a:T3255I,ORF1a:T3646A,ORF1a:P4120H,ORF1b:P314L,ORF1b:G662S,ORF1b:I1257V,ORF1b:A1918V,ORF3a:S26L,ORF7b:T40I,ORF9b:T60A,S:T19R,S:D614G,S:P681R,S:D950N	ORF8:D119-,ORF8:F120-		T16466C,C27638T	T27291C|21J	C5672T,C11572T,C12624A,C29085T	2	1	4	7	2578-2584,2810-2837,3526-3533,3547-3562,3576-3664,3679-3717,3731-3754,3769-3778,5001-5060,5081-5168,5181-5190,5204-5229,5260-5269,6862-7089,7118-7128,7134-7200,7216-7330,8651-8663,8675-8697,8718-8786,8794-8828,8843-8919,16315-16324,16382-16388,16402-16424,16450-16454,16469-16474,16476-16487,16500-16550,16719-16725,16746-16753,19302-19303,19330-19398,19414-19548,19930-20044,20057-20073,20095-20131…	N:367-369,N:373-378,N:382-383,N:388-394,N:398-400,N:406-409,ORF1a:771-773,ORF1a:849-858,ORF1a:1087-1090,ORF1a:1094-1099,ORF1a:1104-1133,ORF1a:1138-1151,ORF1a:1156-1163,ORF1a:1168-1171,ORF1a:1579-1599,ORF1a:1606-1635,ORF1a:1639-1642,ORF1a:1647-1655,ORF1a:1665-1668,ORF1a:2199-2275,ORF1a:2285-2288,ORF1a:2290-2312,ORF1a:2317-2355,ORF1a:2796-2800,ORF1a:2804-2811,ORF1a:2818-2841,ORF1a:2843-2855,ORF1a:2…		3000	104.222	bad	3114	10	0
hCoV-19/USA/WI-WSLH-221315/2021|EPI_ISL_6719872|2021-11-01	hCoV-19/USA/WI-WSLH-221315/2021	EPI_ISL_6719872	2021-11-01	21J	AY.103	B.1.617.2.103	21J	Delta	21J (Delta)	63.0057	mediocre	43	52	0	0	492	0	33	17	0	165	88989	55	29836	0.9795	false	G210T,C241T,C3037T,A3207C,G4181T,G4285A,A5209G,C6402T,T6661C,C7124T,C8986T,G9053T,C10029T,A11201G,A11332G,C14408T,C14937T,G15451A,C16466T,G16912T,A17236G,C19220T,C21618G,T22917G,C22995A,A23403G,C23604G,C23685T,C24208T,G24410A,C25469T,T26767C,T27291C,T27594C,T27638C,C27752T,C27874T,G27967A,A28461G,G28881T,G28916T,G29402T,G29742T	22029-22034,27684-27722,28248-28253,28271			M:I82T,N:D63G,N:R203M,N:G215C,N:D377Y,ORF1a:D981A,ORF1a:A1306S,ORF1a:P2046L,ORF1a:P2287S,ORF1a:V2930L,ORF1a:T3255I,ORF1a:T3646A,ORF1b:P314L,ORF1b:G662S,ORF1b:P1000L,ORF1b:V1149L,ORF1b:I1257V,ORF1b:A1918V,ORF3a:S26L,ORF7a:V82A,ORF7a:I110*,ORF7a:T120I,ORF7b:T40I,ORF8:C25Y,ORF9b:T60A,S:T19R,S:R158G,S:L452R,S:T478K,S:D614G,S:P681R,S:S708F,S:D950N	ORF7a:Y97-,ORF7a:S98-,ORF7a:P99-,ORF7a:I100-,ORF7a:F101-,ORF7a:L102-,ORF7a:I103-,ORF7a:V104-,ORF7a:A105-,ORF7a:A106-,ORF7a:I107-,ORF7a:V108-,ORF7a:F109-,ORF8:D119-,ORF8:F120-,S:E156-,S:F157-			T27291C|21J	A3207C,G4285A,A5209G,T6661C,C14937T,G16912T,C23685T,T27594C,G27967A	0	1	9	10	21717-21990,22325-22542	S:52-143,S:255-327		3000	7.11111	good	492	10	0
hCoV-19/USA/WI-MHDL-2021110196/2021|EPI_ISL_6864873|2021-11-02	hCoV-19/USA/WI-MHDL-2021110196/2021	EPI_ISL_6864873	2021-11-02	21J	AY.46.4	B.1.617.2.46.4	21J	Delta	21J (Delta)	17.0538	good	33	13	0	0	1415	0	27	4	0	477	87714	55	29356	0.932582	false	G210T,C241T,C3037T,G4181T,C6402T,C7124T,C8099T,C8982T,C8986T,G9053T,C10029T,C10977T,A11201G,A11332G,C14408T,C15240T,G15451A,C16466T,C19220T,C21618G,T22917G,C22995A,A23403G,G23545T,C23604G,G24410A,C25469T,T26767C,C26885T,C27874T,A28461G,G28881T,G28916T	22029-22034,28248-28253,28271			M:I82T,N:D63G,N:R203M,N:G215C,ORF1a:A1306S,ORF1a:P2046L,ORF1a:P2287S,ORF1a:T2906I,ORF1a:V2930L,ORF1a:T3255I,ORF1a:A3571V,ORF1a:T3646A,ORF1b:P314L,ORF1b:G662S,ORF1b:P1000L,ORF1b:A1918V,ORF3a:S26L,ORF7b:T40I,ORF9b:T60A,S:T19R,S:R158G,S:L452R,S:T478K,S:D614G,S:E661D,S:P681R,S:D950N	ORF8:D119-,ORF8:F120-,S:E156-,S:F157-			C15240T|21K&21J	C8099T,C8982T,C26885T	0	1	3	4	4996-5287,19276-19570,20480-20496,21147-21386,21717-21990,27512-27808	ORF1a:1577-1674,ORF1b:1937-2035,ORF1b:2338-2343,ORF1b:2560-2640,ORF7a:40-122,ORF7b:1-18,S:52-143		3000	41.2963	mediocre	1415	10	0
hCoV-19/USA/WI-MHDL-2021110219/2021|EPI_ISL_6594796|2021-11-02	hCoV-19/USA/WI-MHDL-2021110219/2021	EPI_ISL_6594796	2021-11-02	21J	AY.3	B.1.617.2.3	21J	Delta	21J (Delta)	14.0941	good	36	7	0	0	348	0	27	2	0	121	88934	39	29742	0.981708	false	G210T,C241T,C3037T,G4181T,C4686T,C6402T,C7124T,C8986T,G9053T,C10029T,A11201G,A11332G,A11456G,C14408T,G15451A,C16466T,C16954T,T16986C,C19220T,C21618G,T22917G,C22995A,A23403G,C23604G,G24410A,A25223G,C25469T,T25686A,T26767C,C27874T,A28461G,G28881T,G28916T,G29050A,G29402T,C29509T	28248-28253,28271			M:I82T,N:D63G,N:R203M,N:G215C,N:D377Y,ORF1a:A1306S,ORF1a:T1474I,ORF1a:P2046L,ORF1a:P2287S,ORF1a:V2930L,ORF1a:T3255I,ORF1a:T3646A,ORF1a:I3731V,ORF1b:P314L,ORF1b:G662S,ORF1b:P1000L,ORF1b:A1918V,ORF3a:S26L,ORF7b:T40I,ORF9b:T60A,S:T19R,S:L452R,S:T478K,S:D614G,S:P681R,S:D950N,S:I1221V	ORF8:D119-,ORF8:F120-		A21987G,T29742G		C4686T,C16954T,T16986C,A25223G,T25686A	2	0	5	7	19474-19554,21321-21366,21896-21899,22029-22034,27543-27575,27589-27760,27765-27770	ORF1b:2003-2029,ORF1b:2618-2633,ORF7a:50-61,ORF7a:66-122,ORF7b:1-2,ORF7b:4-5,S:112-113,S:156-158		3000	1.77778	good	348	10	0
hCoV-19/USA/WI-MHDL-2021110220/2021|EPI_ISL_6594797|2021-11-02	hCoV-19/USA/WI-MHDL-2021110220/2021	EPI_ISL_6594797	2021-11-02	21J	AY.44	B.1.617.2.44	21J	Delta	21J (Delta)	11.1111	good	42	13	0	0	103	0	34	4	0	35	89247	31	29855	0.993947	false	G208A,G210T,C241T,C3037T,G4181T,C6040T,C6402T,C7124T,C7926T,C8251T,C8986T,G9053T,C10029T,G11083T,A11201G,A11332G,T14014G,C14408T,G15451A,C16466T,C19220T,A20763T,C21618G,G21987A,T22917G,C22995A,A23403G,C23604G,G24410A,C25469T,G25785T,T26767C,T27638C,C27752T,C27874T,A28461G,G28541T,G28881T,G28916T,G29402T,A29700G,G29742T	22029-22034,28248-28253,28271			M:I82T,N:D63G,N:A90S,N:R203M,N:G215C,N:D377Y,ORF1a:A1306S,ORF1a:P2046L,ORF1a:P2287S,ORF1a:A2554V,ORF1a:V2930L,ORF1a:T3255I,ORF1a:L3606F,ORF1a:T3646A,ORF1b:F183V,ORF1b:P314L,ORF1b:G662S,ORF1b:P1000L,ORF1b:A1918V,ORF3a:S26L,ORF3a:W131C,ORF7a:V82A,ORF7a:T120I,ORF7b:T40I,ORF9b:T60A,ORF9b:E86D,S:T19R,S:G142D,S:R158G,S:L452R,S:T478K,S:D614G,S:P681R,S:D950N	ORF8:D119-,ORF8:F120-,S:E156-,S:F157-			C7926T|21J&21K,G11083T|21J&19A,G25785T|20I	G208A,C8251T,A20763T,G28541T	0	3	4	7	19455-19557	ORF1b:1996-2030		3000	0	good	103	10	0
hCoV-19/USA/WI-MHDL-2021110223/2021|EPI_ISL_6594800|2021-11-02	hCoV-19/USA/WI-MHDL-2021110223/2021	EPI_ISL_6594800	2021-11-02	21J	AY.103	B.1.617.2.103	21J	Delta	21J (Delta)	14.0733	good	40	13	0	0	328	0	31	4	0	112	88892	39	29742	0.982376	false	G210T,C241T,T2827C,C3037T,G4181T,C4423T,C6016T,C6402T,C7124T,T7386C,C8986T,G9053T,C10029T,A11201G,A11332G,C11572T,C12624A,C14408T,G15451A,C16466T,A17236G,C19220T,C21618G,G21987A,T22917G,C22995A,A23403G,C23604G,C24208T,G24410A,C25469T,C25549T,T26767C,T27291C,C27752T,C27874T,A28461G,G28881T,G28916T,G29402T	22029-22034,28248-28253,28271			M:I82T,N:D63G,N:R203M,N:G215C,N:D377Y,ORF1a:A1306S,ORF1a:P2046L,ORF1a:P2287S,ORF1a:M2374T,ORF1a:V2930L,ORF1a:T3255I,ORF1a:T3646A,ORF1a:P4120H,ORF1b:P314L,ORF1b:G662S,ORF1b:P1000L,ORF1b:I1257V,ORF1b:A1918V,ORF3a:S26L,ORF3a:L53F,ORF7a:T120I,ORF7b:T40I,ORF9b:T60A,S:T19R,S:G142D,S:R158G,S:L452R,S:T478K,S:D614G,S:P681R,S:D950N	ORF8:D119-,ORF8:F120-,S:E156-,S:F157-		T29742G	T27291C|21J	T2827C,C4423T,C6016T,T7386C,C11572T,C12624A,C25549T	1	1	7	9	19298-19302,19407-19556,27545-27576,27590-27730	ORF1b:1944-1945,ORF1b:1980-2030,ORF7a:51-61,ORF7a:66-113		3000	1.03704	good	328	10	0
hCoV-19/USA/WI-MHDL-2021110224/2021|EPI_ISL_6594801|2021-11-02	hCoV-19/USA/WI-MHDL-2021110224/2021	EPI_ISL_6594801	2021-11-02	21I	AY.47	B.1.617.2.47	21I	Delta	21I (Delta)	0.173611	good	42	13	0	0	125	0	32	4	0	43	89229	39	29857	0.993011	false	G210T,C241T,C920T,C1684T,C3037T,C5144T,G5164T,C5184T,A5584G,C9891T,G10265T,T11418C,C11514T,C11776T,C12049T,C13019T,C13965T,C14408T,G15451A,A15604G,C16466T,A21405G,C21618G,G21987A,C22227T,G22427A,T22917G,C22995A,A23403G,C23604G,G24410A,C25469T,G26065A,T26767C,T27638C,C27752T,C28236T,G28326T,A28461G,G28881T,G29402T,G29742T	22029-22034,28248-28253,28271			M:I82T,N:G18V,N:D63G,N:R203M,N:D377Y,ORF1a:E1633D,ORF1a:P1640L,ORF1a:A3209V,ORF1a:G3334C,ORF1a:V3718A,ORF1a:T3750I,ORF1b:P314L,ORF1b:G662S,ORF1b:N713D,ORF1b:P1000L,ORF3a:S26L,ORF3a:V225I,ORF7a:V82A,ORF7a:T120I,ORF8:R115C,ORF9b:V15L,ORF9b:T60A,S:T19R,S:G142D,S:R158G,S:A222V,S:V289I,S:L452R,S:T478K,S:D614G,S:P681R,S:D950N	ORF8:D119-,ORF8:F120-,S:E156-,S:F157-				C920T,C5144T,G10265T,C11776T,C13965T,A15604G,A21405G,G26065A,C28236T	0	0	9	9	19399,19429-19552	ORF1b:1978,ORF1b:1988-2029		3000	0	good	125	10	0
hCoV-19/USA/WI-MHDL-2021110293/2021|EPI_ISL_6371359|2021-11-02	hCoV-19/USA/WI-MHDL-2021110293/2021	EPI_ISL_6371359	2021-11-02	21J	AY.119	B.1.617.2.119	21J	Delta	21J (Delta)	34.679	mediocre	32	13	0	0	1890	0	28	4	0	638	88294	343	29836	0.923118	false	A919G,C3037T,G4181T,C6402T,C8986T,G9053T,C10029T,A11201G,A11332G,C12756T,C14408T,G15451A,C16466T,G19006T,C19220T,C21618G,A23403G,C23604G,C23987T,G24410A,C25469T,T26767C,T27384C,T27638C,C27752T,C27874T,A28461G,G28881T,G28916T,C29013T,G29402T,G29742T	22029-22034,28248-28253,28271			M:I82T,N:D63G,N:R203M,N:G215C,N:T247I,N:D377Y,ORF1a:A1306S,ORF1a:P2046L,ORF1a:V2930L,ORF1a:T3255I,ORF1a:T3646A,ORF1a:T4164I,ORF1b:P314L,ORF1b:G662S,ORF1b:P1000L,ORF1b:A1847S,ORF1b:A1918V,ORF3a:S26L,ORF7a:V82A,ORF7a:T120I,ORF7b:T40I,ORF9b:T60A,S:T19R,S:R158G,S:D614G,S:P681R,S:P809S,S:D950N	ORF8:D119-,ORF8:F120-,S:E156-,S:F157-			T27384C|21L&22C&23A&22A&22D&22F&rec&23B	A919G,C12756T,C23987T,C29013T	0	1	4	5	2569-2850,7093-7332,8636-8913,9246,10738-11022,13364-13625,21717-21990,22323,22878-23144	ORF1a:26,ORF1a:768-862,ORF1a:2276-2356,ORF1a:2791-2883,ORF1a:2994,ORF1a:3491-3586,ORF1a:4367-4401,ORF1b:1-53,S:52-143,S:254,S:439-528		3000	58.8889	mediocre	1890	10	0
hCoV-19/USA/WI-MHDL-2021110294/2021|EPI_ISL_6371360|2021-11-02	hCoV-19/USA/WI-MHDL-2021110294/2021	EPI_ISL_6371360	2021-11-02	21J	AY.44	B.1.617.2.44	21J	Delta	21J (Delta)	47.1113	mediocre	48	13	0	0	1066	0	35	4	0	359	89094	55	29836	0.960305	false	G210T,C241T,C934T,A2296G,C3037T,C3264T,G4181T,C6040T,C6402T,C7926T,C8986T,G9053T,G9237A,C10029T,G11042T,A11201G,G11230T,A11332G,C11471T,T12877C,T14014G,C14408T,G15451A,C16466T,T16692C,G18255T,C19220T,C21618G,A23403G,C23604G,G24410A,C25469T,C25626A,T26767C,T27618C,T27638C,C27752T,C27874T,A28461G,C28720T,G28881T,G28916T,C29011T,G29338T,G29402T,A29500C,A29700G,G29742T	22029-22034,28248-28253,28271			M:I82T,N:D63G,N:R203M,N:G215C,N:K355N,N:D377Y,N:Q409H,ORF1a:T1000I,ORF1a:A1306S,ORF1a:P2046L,ORF1a:A2554V,ORF1a:V2930L,ORF1a:R2991K,ORF1a:T3255I,ORF1a:V3593F,ORF1a:T3646A,ORF1a:M3655I,ORF1a:L3736F,ORF1b:F183V,ORF1b:P314L,ORF1b:G662S,ORF1b:P1000L,ORF1b:M1596I,ORF1b:A1918V,ORF3a:S26L,ORF3a:H78Q,ORF7a:V82A,ORF7a:T120I,ORF7b:T40I,ORF9b:T60A,S:T19R,S:R158G,S:D614G,S:P681R,S:D950N	ORF8:D119-,ORF8:F120-,S:E156-,S:F157-			C7926T|21J&21K,G11230T|19B	C934T,A2296G,C3264T,G9237A,G11042T,C11471T,T12877C,T16692C,G18255T,C25626A,T27618C,C28720T,C29011T,G29338T,A29500C	0	2	15	17	7093-7332,10738-11022,21717-21990,22878-23144	ORF1a:2276-2356,ORF1a:3491-3586,S:52-143,S:439-528		3000	28.3704	good	1066	10	0
hCoV-19/USA/WI-MHDL-2021110302/2021|EPI_ISL_6491499|2021-11-02	hCoV-19/USA/WI-MHDL-2021110302/2021	EPI_ISL_6491499	2021-11-02	21J	AY.39	B.1.617.2.39	21J	Delta	21J (Delta)	124.364	bad	33	13	0	0	3311	0	27	4	0	1113	88290	343	29836	0.875598	false	G2231T,G2946A,C3037T,G3304T,G3433T,G4181T,A5269G,C6402T,C8986T,G9053T,C10029T,A11201G,A11332G,T13929C,C14408T,G15451A,C16466T,C19220T,G21372T,A23403G,C23410T,C23604G,G24410A,C25469T,T26767C,T27638C,C27752T,C27874T,A28461G,G28881T,G28916T,G29402T,G29742T	22029-22034,28248-28253,28271			M:I82T,N:D63G,N:R203M,N:G215C,N:D377Y,ORF1a:A656S,ORF1a:G894D,ORF1a:E1013D,ORF1a:A1306S,ORF1a:P2046L,ORF1a:V2930L,ORF1a:T3255I,ORF1a:T3646A,ORF1b:P314L,ORF1b:G662S,ORF1b:P1000L,ORF1b:A1918V,ORF1b:Q2635H,ORF3a:S26L,ORF7a:V82A,ORF7a:T120I,ORF7b:T40I,ORF9b:T60A,S:R158G,S:D614G,S:P681R,S:D950N	ORF8:D119-,ORF8:F120-,S:E156-,S:F157-				G2231T,G2946A,G3304T,G3433T,A5269G,T13929C,C23410T	0	0	7	7	1943-2205,2569-2850,3508-3796,4071-4077,7093-7332,8320-8340,8636-8913,9246-9502,10738-11022,13364-13625,19276-19570,21428-21990,22878-23144,27604,27608	ORF1a:26,ORF1a:560-647,ORF1a:768-862,ORF1a:1081-1177,ORF1a:1269-1271,ORF1a:2276-2356,ORF1a:2685-2692,ORF1a:2791-2883,ORF1a:2994-3079,ORF1a:3491-3586,ORF1a:4367-4401,ORF1b:1-53,ORF1b:1937-2035,ORF1b:2654-2696,ORF7a:71-72,S:1-143,S:439-528		3000	111.519	bad	3311	10	0
hCoV-19/USA/WI-MHDL-2021110306/2021|EPI_ISL_6491501|2021-11-02	hCoV-19/USA/WI-MHDL-2021110306/2021	EPI_ISL_6491501	2021-11-02	21J	AY.103	B.1.617.2.103	21J	Delta	21J (Delta)	0.992606	good	38	13	0	0	569	0	29	4	0	191	89134	55	29836	0.976925	false	G210T,C241T,T2827C,C3037T,G4181T,C6402T,C7124T,C8986T,G9053T,C10029T,A11201G,A11332G,C11572T,C12624A,C14408T,G15451A,C16466T,A17236G,C18795T,C19220T,C21618G,T22917G,C22995A,A23403G,C23604G,C24208T,G24410A,C25469T,T26767C,T27291C,T27638C,C27752T,C27874T,A28461G,G28881T,G28916T,G29402T,G29742T	22029-22034,28248-28253,28271			M:I82T,N:D63G,N:R203M,N:G215C,N:D377Y,ORF1a:A1306S,ORF1a:P2046L,ORF1a:P2287S,ORF1a:V2930L,ORF1a:T3255I,ORF1a:T3646A,ORF1a:P4120H,ORF1b:P314L,ORF1b:G662S,ORF1b:P1000L,ORF1b:I1257V,ORF1b:A1918V,ORF3a:S26L,ORF7a:V82A,ORF7a:T120I,ORF7b:T40I,ORF9b:T60A,S:T19R,S:R158G,S:L452R,S:T478K,S:D614G,S:P681R,S:D950N	ORF8:D119-,ORF8:F120-,S:E156-,S:F157-			T27291C|21J	T2827C,C11572T,C12624A,C18795T	0	1	4	5	19276-19570,21717-21990	ORF1b:1937-2035,S:52-143		3000	9.96296	good	569	10	0
hCoV-19/USA/WI-MHDL-2021110307/2021|EPI_ISL_6491502|2021-11-02	hCoV-19/USA/WI-MHDL-2021110307/2021	EPI_ISL_6491502	2021-11-02	21J	AY.44	B.1.617.2.44	21J	Delta	21J (Delta)	44.4444	mediocre	46	13	0	0	274	0	34	4	0	92	89102	55	29836	0.986791	false	G210T,C241T,C3037T,G4181T,C6040T,C6402T,C6638T,C7124T,C7926T,C8986T,G9053T,C10029T,A11201G,A11332G,G12079A,C12100A,T14014G,C14408T,G15451A,C16466T,C16726T,T18144C,C19185T,C19220T,C21618G,T22917G,C22995A,A23403G,C23604G,G24410A,C24865T,T25191C,C25469T,T26767C,G27561T,T27638C,C27752T,C27874T,G28073T,A28461G,C28507T,G28881T,G28916T,G29402T,A29700G,G29742T	22029-22034,28248-28253,28271			M:I82T,N:D63G,N:R203M,N:G215C,N:D377Y,ORF1a:A1306S,ORF1a:P2046L,ORF1a:H2125Y,ORF1a:P2287S,ORF1a:A2554V,ORF1a:V2930L,ORF1a:T3255I,ORF1a:T3646A,ORF1b:F183V,ORF1b:P314L,ORF1b:G662S,ORF1b:P1000L,ORF1b:H1087Y,ORF1b:A1918V,ORF3a:S26L,ORF7a:V82A,ORF7a:T120I,ORF7b:T40I,ORF8:L60F,ORF9b:T60A,ORF9b:A75V,S:T19R,S:R158G,S:L452R,S:T478K,S:D614G,S:P681R,S:D950N,S:I1210T	ORF8:D119-,ORF8:F120-,S:E156-,S:F157-			C6638T|21J,C7926T|21J&21K,C16726T|21J,G28073T|21J	G12079A,C12100A,T18144C,C19185T,C24865T,T25191C,G27561T,C28507T	0	4	8	12	21717-21990	S:52-143		3000	0	good	274	10	0
hCoV-19/USA/WI-MHDL-2021110308/2021|EPI_ISL_6491503|2021-11-02	hCoV-19/USA/WI-MHDL-2021110308/2021	EPI_ISL_6491503	2021-11-02	21J	AY.25	B.1.617.2.25	21J	Delta	21J (Delta)	4.34028	good	40	13	0	0	274	0	31	4	0	92	89126	55	29836	0.986791	false	C140T,G210T,C241T,C2358T,C3037T,G4148T,G4181T,C6402T,C7124T,C8986T,G9053T,C10029T,A11201G,A11332G,G12801A,C14408T,G15451A,C16466T,C19220T,G21255A,C21618G,G22801T,T22917G,C22995A,A23403G,C23604G,G24410A,C25469T,G26107C,T26767C,A27507C,T27638C,C27752T,C27874T,A28461G,G28881T,G28916T,G29402T,G29422T,G29742T	22029-22034,28248-28253,28271			M:I82T,N:D63G,N:R203M,N:G215C,N:D377Y,ORF1a:A698V,ORF1a:V1295F,ORF1a:A1306S,ORF1a:P2046L,ORF1a:P2287S,ORF1a:V2930L,ORF1a:T3255I,ORF1a:T3646A,ORF1a:R4179K,ORF1b:P314L,ORF1b:G662S,ORF1b:P1000L,ORF1b:A1918V,ORF3a:S26L,ORF3a:E239Q,ORF7a:V82A,ORF7a:T120I,ORF7b:T40I,ORF9b:T60A,S:T19R,S:R158G,S:L452R,S:T478K,S:D614G,S:P681R,S:D950N	ORF8:D119-,ORF8:F120-,S:E156-,S:F157-			G12801A|21J,G22801T|21J	C140T,C2358T,G4148T,G21255A,G29422T	0	2	5	7	21717-21990	S:52-143		3000	0	good	274	10	0
hCoV-19/USA/WI-MHDL-2021110309/2021|EPI_ISL_6491504|2021-11-02	hCoV-19/USA/WI-MHDL-2021110309/2021	EPI_ISL_6491504	2021-11-02	21J	AY.25	B.1.617.2.25	21J	Delta	21J (Delta)	0	good	38	13	0	0	274	0	30	4	0	92	89134	55	29836	0.986791	false	G210T,C241T,C2395T,C3037T,G4181T,T4735C,C6402T,C7124T,C8986T,G9053T,C10029T,A11201G,A11332G,A13869G,C14408T,G15451A,C16466T,C19220T,C21618G,T22917G,C22995A,C23127T,A23403G,C23604G,G24410A,C25469T,G26107C,T26767C,A27262G,A27507C,T27638C,C27752T,C27874T,A28461G,G28881T,G28916T,G29402T,G29742T	22029-22034,28248-28253,28271			M:I82T,N:D63G,N:R203M,N:G215C,N:D377Y,ORF1a:A1306S,ORF1a:P2046L,ORF1a:P2287S,ORF1a:V2930L,ORF1a:T3255I,ORF1a:T3646A,ORF1b:P314L,ORF1b:G662S,ORF1b:P1000L,ORF1b:A1918V,ORF3a:S26L,ORF3a:E239Q,ORF6:T21A,ORF7a:V82A,ORF7a:T120I,ORF7b:T40I,ORF9b:T60A,S:T19R,S:R158G,S:L452R,S:T478K,S:A522V,S:D614G,S:P681R,S:D950N	ORF8:D119-,ORF8:F120-,S:E156-,S:F157-			C2395T|21C	T4735C,A13869G,C23127T,A27262G	0	1	4	5	21717-21990	S:52-143		3000	0	good	274	10	0
hCoV-19/USA/WI-MHDL-2021110310/2021|EPI_ISL_6491505|2021-11-02	hCoV-19/USA/WI-MHDL-2021110310/2021	EPI_ISL_6491505	2021-11-02	21J	AY.44	B.1.617.2.44	21J	Delta	21J (Delta)	91.8403	mediocre	47	13	0	0	274	0	36	4	0	92	89098	55	29836	0.986791	false	G210T,C241T,T1104C,C3037T,G4181T,C5221T,C6040T,C6402T,C6638T,C7124T,C7926T,C8986T,G9053T,C10029T,A11117G,A11201G,A11332G,C12756T,T14014G,C14408T,G15451A,C15540T,C16466T,C16726T,C19220T,C19524T,C21618G,A22320G,T22917G,C22995A,A23403G,C23604G,G24410A,C25469T,G25644T,T26767C,T27638C,C27752T,C27874T,G28073T,A28461G,G28881T,G28916T,G29402T,A29700G,G29715T,G29742T	22029-22034,28248-28253,28271			M:I82T,N:D63G,N:R203M,N:G215C,N:D377Y,ORF1a:I280T,ORF1a:A1306S,ORF1a:P2046L,ORF1a:H2125Y,ORF1a:P2287S,ORF1a:A2554V,ORF1a:V2930L,ORF1a:T3255I,ORF1a:I3618V,ORF1a:T3646A,ORF1a:T4164I,ORF1b:F183V,ORF1b:P314L,ORF1b:G662S,ORF1b:P1000L,ORF1b:H1087Y,ORF1b:A1918V,ORF3a:S26L,ORF7a:V82A,ORF7a:T120I,ORF7b:T40I,ORF8:L60F,ORF9b:T60A,S:T19R,S:R158G,S:D253G,S:L452R,S:T478K,S:D614G,S:P681R,S:D950N	ORF8:D119-,ORF8:F120-,S:E156-,S:F157-			C6638T|21J,C7926T|21J&21K,C16726T|21J,C19524T|22B&21J,A22320G|21F&22F,G28073T|21J	T1104C,C5221T,A11117G,C12756T,C15540T,G25644T,G29715T	0	6	7	13	21717-21990	S:52-143		3000	0	good	274	10	0
hCoV-19/USA/WI-MHDL-2021110311/2021|EPI_ISL_6491506|2021-11-02	hCoV-19/USA/WI-MHDL-2021110311/2021	EPI_ISL_6491506	2021-11-02	21J	AY.3	B.1.617.2.3	21J	Delta	21J (Delta)	0.783553	good	40	13	0	0	539	0	30	4	0	181	88613	55	29665	0.97221	false	G210T,C241T,C3037T,G4181T,C5583T,C5884T,C6402T,G6532T,C7124T,C8986T,G9053T,C10029T,A11201G,A11332G,A11456G,C13944T,C14408T,G15451A,C16466T,C19220T,C21618G,T22917G,C22995A,T23284C,A23403G,C23604G,G24410A,C25339T,C25469T,G26262A,T26767C,T27638C,C27752T,C27874T,A28461G,G28881T,G28916T,G29050A,G29402T,C29509T	22029-22034,28248-28253,28271			M:I82T,N:D63G,N:R203M,N:G215C,N:D377Y,ORF1a:A1306S,ORF1a:T1773I,ORF1a:P2046L,ORF1a:E2089D,ORF1a:P2287S,ORF1a:V2930L,ORF1a:T3255I,ORF1a:T3646A,ORF1a:I3731V,ORF1b:P314L,ORF1b:G662S,ORF1b:P1000L,ORF1b:A1918V,ORF3a:S26L,ORF7a:V82A,ORF7a:T120I,ORF7b:T40I,ORF9b:T60A,S:T19R,S:R158G,S:L452R,S:T478K,S:D614G,S:P681R,S:D950N	ORF8:D119-,ORF8:F120-,S:E156-,S:F157-				C5583T,C5884T,G6532T,C13944T,G26262A	0	0	5	5	5933-6197,21717-21990	ORF1a:1890-1978,S:52-143		3000	8.85185	good	539	10	0
hCoV-19/USA/WI-MHDL-2021110433/2021|EPI_ISL_6861945|2021-11-02	hCoV-19/USA/WI-MHDL-2021110433/2021	EPI_ISL_6861945	2021-11-02	21J	AY.118	B.1.617.2.118	21J	Delta	21J (Delta)	21.3408	good	44	13	0	0	456	0	32	4	0	153	89203	39	29851	0.981741	false	G210T,C241T,T826C,A2206G,C3037T,G4181T,T5218C,C6402T,C7124T,C8986T,G9053T,T9643C,C10029T,C10279T,A11201G,A11332G,C14408T,C15352T,G15451A,C16466T,T17154C,C19220T,C21618G,C21846T,G21987A,T22917G,C22995A,A23403G,C23604G,T23728C,G24410A,C25469T,C26527T,T26767C,A27338T,C27513T,C27752T,C27874T,G28122T,A28461G,G28881T,G28916T,G29402T,G29742T	22029-22034,28248-28253,28271			M:A2V,M:I82T,N:D63G,N:R203M,N:G215C,N:D377Y,ORF1a:A1306S,ORF1a:P2046L,ORF1a:P2287S,ORF1a:V2930L,ORF1a:T3255I,ORF1a:T3646A,ORF1b:P314L,ORF1b:L629F,ORF1b:G662S,ORF1b:P1000L,ORF1b:A1918V,ORF3a:S26L,ORF6:E46V,ORF7a:T120I,ORF7b:T40I,ORF8:G77C,ORF9b:T60A,S:T19R,S:T95I,S:G142D,S:R158G,S:L452R,S:T478K,S:D614G,S:P681R,S:D950N	ORF8:D119-,ORF8:F120-,S:E156-,S:F157-		C27638T	C27513T|22B	A2206G,T5218C,T9643C,C10279T,C15352T,T17154C,T23728C,C26527T,G28122T	1	1	9	11	19291-19557,21163-21344,21358-21364	ORF1b:1942-2030,ORF1b:2566-2626,ORF1b:2631-2633		3000	5.77778	good	456	10	0
hCoV-19/USA/WI-MHDL-2021110435/2021|EPI_ISL_6861947|2021-11-02	hCoV-19/USA/WI-MHDL-2021110435/2021	EPI_ISL_6861947	2021-11-02	21J	AY.3	B.1.617.2.3	21J	Delta	21J (Delta)	4.34028	good	43	13	0	0	258	0	32	4	0	86	88919	39	29755	0.985152	false	G210T,C241T,C3037T,G4181T,C5884T,C6354T,C6402T,C7124T,C8986T,G9053T,C10029T,A11201G,A11332G,A11456G,A12148T,C12412A,C14408T,G15451A,C16466T,C19220T,G20931T,C21618G,T21925C,G21987A,T22917G,C22995A,T23284C,A23403G,C23604G,G24410A,C25339T,C25469T,T26767C,T27638C,T27734C,C27752T,C27874T,A28461G,G28881T,G28916T,G29050A,G29402T,C29509T	22029-22034,28248-28253,28271			M:I82T,N:D63G,N:R203M,N:G215C,N:D377Y,ORF1a:A1306S,ORF1a:S2030L,ORF1a:P2046L,ORF1a:P2287S,ORF1a:V2930L,ORF1a:T3255I,ORF1a:T3646A,ORF1a:I3731V,ORF1a:Q3961H,ORF1b:P314L,ORF1b:G662S,ORF1b:P1000L,ORF1b:A1918V,ORF3a:S26L,ORF7a:V82A,ORF7a:F114S,ORF7a:T120I,ORF7b:T40I,ORF9b:T60A,S:T19R,S:G142D,S:R158G,S:L452R,S:T478K,S:D614G,S:P681R,S:D950N	ORF8:D119-,ORF8:F120-,S:E156-,S:F157-		T29742G		C5884T,C6354T,A12148T,C12412A,G20931T,T21925C,T27734C	1	0	7	8	19294-19551	ORF1b:1943-2028		3000	0	good	258	10	0
hCoV-19/USA/WI-MHDL-2021110462/2021|EPI_ISL_6861970|2021-11-02	hCoV-19/USA/WI-MHDL-2021110462/2021	EPI_ISL_6861970	2021-11-02	21J	AY.3	B.1.617.2.3	21J	Delta	21J (Delta)	17.3611	good	44	13	0	0	255	0	32	4	0	86	88729	39	29693	0.983179	false	G210T,C241T,G284A,C3037T,C3796T,G4181T,C4927T,C6402T,C7086T,C7124T,C8986T,G9053T,C10029T,A11201G,A11332G,A11456G,C14408T,C14583T,C14755T,G15451A,C15763T,C16466T,T18471C,C19220T,C21618G,T22917G,C22995A,T23284C,A23403G,C23604G,G24410A,C25339T,C25469T,T26767C,T27638C,C27752T,C27874T,A28461G,G28881T,G28916T,G29050A,C29108T,G29402T,C29509T	22029-22034,28248-28253,28271			M:I82T,N:D63G,N:R203M,N:G215C,N:P279S,N:D377Y,ORF1a:G7S,ORF1a:A1306S,ORF1a:P2046L,ORF1a:T2274I,ORF1a:P2287S,ORF1a:V2930L,ORF1a:T3255I,ORF1a:T3646A,ORF1a:I3731V,ORF1b:P314L,ORF1b:H430Y,ORF1b:G662S,ORF1b:P1000L,ORF1b:A1918V,ORF3a:S26L,ORF7a:V82A,ORF7a:T120I,ORF7b:T40I,ORF9b:T60A,S:T19R,S:R158G,S:L452R,S:T478K,S:D614G,S:P681R,S:D950N	ORF8:D119-,ORF8:F120-,S:E156-,S:F157-		A21987G	C3796T|22D	G284A,C4927T,C7086T,C14583T,C14755T,C15763T,T18471C,C29108T	1	1	8	10	19298-19552	ORF1b:1944-2029		3000	0	good	255	10	0
hCoV-19/USA/WI-MHDL-2021110463/2021|EPI_ISL_6861971|2021-11-02	hCoV-19/USA/WI-MHDL-2021110463/2021	EPI_ISL_6861971	2021-11-02	21J	AY.3	B.1.617.2.3	21J	Delta	21J (Delta)	6.25	good	41	13	0	0	255	0	33	4	0	85	88909	39	29749	0.985052	false	G210T,C241T,G2117T,C3037T,G4181T,C6402T,C7124T,C8986T,G9053T,C10029T,C10377T,A11201G,A11332G,A11456G,C14408T,C15368T,G15451A,C16466T,C19220T,C21618G,G21987A,T22917G,C22995A,T23284C,A23403G,C23604G,G24410A,C25339T,C25469T,G25785T,T26767C,T27638C,C27752T,C27874T,A28461G,G28881T,G28916T,T28945A,G29050A,G29402T,C29509T	22029-22034,28248-28253,28271			M:I82T,N:D63G,N:R203M,N:G215C,N:D377Y,ORF1a:G618C,ORF1a:A1306S,ORF1a:P2046L,ORF1a:P2287S,ORF1a:V2930L,ORF1a:T3255I,ORF1a:P3371L,ORF1a:T3646A,ORF1a:I3731V,ORF1b:P314L,ORF1b:T634I,ORF1b:G662S,ORF1b:P1000L,ORF1b:A1918V,ORF3a:S26L,ORF3a:W131C,ORF7a:V82A,ORF7a:T120I,ORF7b:T40I,ORF9b:T60A,S:T19R,S:G142D,S:R158G,S:L452R,S:T478K,S:D614G,S:P681R,S:D950N	ORF8:D119-,ORF8:F120-,S:E156-,S:F157-		T29742G	G25785T|20I	G2117T,C10377T,C15368T,T28945A	1	1	4	6	19297-19551	ORF1b:1944-2028		3000	0	good	255	10	0
hCoV-19/USA/WI-MHDL-2021110464/2021|EPI_ISL_6861972|2021-11-02	hCoV-19/USA/WI-MHDL-2021110464/2021	EPI_ISL_6861972	2021-11-02	21J	AY.44	B.1.617.2.44	21J	Delta	21J (Delta)	39.0625	mediocre	46	13	0	0	293	0	34	4	0	99	89201	39	29853	0.987259	false	G210T,C241T,C3037T,G4181T,C6040T,C6402T,C6638T,C7124T,C7926T,C8986T,G9053T,C10029T,C10969T,A11201G,A11332G,T14014G,C14408T,G15451A,C16466T,C16726T,G18412A,C19220T,C20646T,C21618G,G21987A,T22917G,C22995A,A23403G,C23604G,G24410A,C25469T,T26767C,T27638C,C27752T,C27874T,G28073T,G28460A,A28461G,G28881T,G28916T,C29119T,G29402T,G29593T,A29700G,G29734C,G29742T	22029-22034,28248-28253,28271			M:I82T,N:D63S,N:R203M,N:G215C,N:D377Y,ORF1a:A1306S,ORF1a:P2046L,ORF1a:H2125Y,ORF1a:P2287S,ORF1a:A2554V,ORF1a:V2930L,ORF1a:T3255I,ORF1a:T3646A,ORF1b:F183V,ORF1b:P314L,ORF1b:G662S,ORF1b:P1000L,ORF1b:H1087Y,ORF1b:V1649I,ORF1b:A1918V,ORF3a:S26L,ORF7a:V82A,ORF7a:T120I,ORF7b:T40I,ORF8:L60F,ORF9b:T60A,S:T19R,S:G142D,S:R158G,S:L452R,S:T478K,S:D614G,S:P681R,S:D950N	ORF8:D119-,ORF8:F120-,S:E156-,S:F157-			C6638T|21J,C7926T|21J&21K,C16726T|21J,G28073T|21J	C10969T,G18412A,C20646T,G28460A,C29119T,G29593T,G29734C	0	4	7	11	19298-19551,21174-21180,27545-27576	ORF1b:1944-2028,ORF1b:2569-2571,ORF7a:51-61		3000	0	good	293	10	0
hCoV-19/USA/WI-MHDL-2021110465/2021|EPI_ISL_6861973|2021-11-02	hCoV-19/USA/WI-MHDL-2021110465/2021	EPI_ISL_6861973	2021-11-02	21J	AY.100	B.1.617.2.100	21J	Delta	21J (Delta)	1.5625	good	45	13	0	0	260	0	34	4	0	87	89205	39	29853	0.988362	false	G210T,C241T,C815T,C3037T,G4181T,G6358A,C6402T,C7124T,C8986T,G9053T,C9559T,C10029T,A11201G,A11332G,G11761T,C14408T,C15240T,G15451A,C16466T,G17122T,C19220T,C19881T,C21618G,C21846T,G21987A,T22917G,G22936A,C22995A,A23403G,C23604G,G24410A,C25469T,T26767C,C26882T,T27638C,C27752T,C27874T,A27985T,T28007C,C28432T,A28461G,G28881T,G28916T,G29402T,G29742T	22029-22034,28248-28253,28271			M:I82T,N:D63G,N:R203M,N:G215C,N:D377Y,ORF1a:R184C,ORF1a:A1306S,ORF1a:P2046L,ORF1a:P2287S,ORF1a:V2930L,ORF1a:T3255I,ORF1a:T3646A,ORF1a:K3832N,ORF1b:P314L,ORF1b:G662S,ORF1b:P1000L,ORF1b:A1219S,ORF1b:A1918V,ORF3a:S26L,ORF7a:V82A,ORF7a:T120I,ORF7b:T40I,ORF8:Y31F,ORF9b:S50L,ORF9b:T60A,S:T19R,S:T95I,S:G142D,S:R158G,S:L452R,S:T478K,S:D614G,S:P681R,S:D950N	ORF8:D119-,ORF8:F120-,S:E156-,S:F157-			C28432T|21J	C815T,G6358A,G11761T,C19881T,G22936A,C26882T,A27985T	0	1	7	8	19298-19557	ORF1b:1944-2030		3000	0	good	260	10	0
hCoV-19/USA/WI-MHDL-2021120030/2021|EPI_ISL_7153302|2021-11-02	hCoV-19/USA/WI-MHDL-2021120030/2021	EPI_ISL_7153302	2021-11-02	21J	AY.103	B.1.617.2.103	21J	Delta	21J (Delta)	1.5625	good	42	13	0	0	0	0	31	4	0	0	89118	55	29836	0.995954	false	G210T,C241T,T2827C,C3037T,G4181T,C6402T,C7124T,C8986T,G9053T,C10029T,A11201G,A11332G,C11572T,C12624A,C14408T,G15451A,C15763T,C16466T,A17236G,C19220T,C20133T,C21618G,G21987A,A22107T,T22917G,C22995A,A23403G,C23604G,C24208T,G24410A,C25469T,C25521T,T26767C,T27291C,T27638C,C27752T,C27874T,A28461G,G28881T,G28916T,G29402T,G29742T	22029-22034,28248-28253,28271			M:I82T,N:D63G,N:R203M,N:G215C,N:D377Y,ORF1a:A1306S,ORF1a:P2046L,ORF1a:P2287S,ORF1a:V2930L,ORF1a:T3255I,ORF1a:T3646A,ORF1a:P4120H,ORF1b:P314L,ORF1b:G662S,ORF1b:P1000L,ORF1b:I1257V,ORF1b:A1918V,ORF3a:S26L,ORF7a:V82A,ORF7a:T120I,ORF7b:T40I,ORF9b:T60A,S:T19R,S:G142D,S:R158G,S:K182I,S:L452R,S:T478K,S:D614G,S:P681R,S:D950N	ORF8:D119-,ORF8:F120-,S:E156-,S:F157-			T27291C|21J	T2827C,C11572T,C12624A,C15763T,C20133T,A22107T,C25521T	0	1	7	8				3000	0	good	0	10	0
hCoV-19/USA/WI-MHDL-2021120299/2021|EPI_ISL_7828362|2021-11-02	hCoV-19/USA/WI-MHDL-2021120299/2021	EPI_ISL_7828362	2021-11-02	21J	B.1.617.2	B.1.617.2	21J	Delta	21J (Delta)	38.6931	mediocre	38	7	0	0	1718	0	30	2	0	582	89253	39	29851	0.939538	false	G210T,C241T,C1218T,C3037T,G4181T,C6402T,T6478C,C7124T,A7933G,C8986T,G9053T,C10029T,A11201G,A11332G,C12493T,C14408T,G15451A,C16049T,C16466T,A17344G,C18395T,C19220T,C21077T,C21618G,T22917G,C22995A,A23403G,C23604G,G24124T,G24410A,C25469T,G25855T,T26767C,C27874T,A28461G,G28881T,G28916T,G29742T	28248-28253,28271			M:I82T,N:D63G,N:R203M,N:G215C,ORF1a:S318L,ORF1a:A1306S,ORF1a:P2046L,ORF1a:P2287S,ORF1a:V2930L,ORF1a:T3255I,ORF1a:T3646A,ORF1b:P314L,ORF1b:G662S,ORF1b:T861I,ORF1b:P1000L,ORF1b:I1293V,ORF1b:A1643V,ORF1b:A1918V,ORF1b:T2537I,ORF3a:S26L,ORF3a:D155Y,ORF7b:T40I,ORF9b:T60A,S:T19R,S:L452R,S:T478K,S:D614G,S:P681R,S:K854N,S:D950N	ORF8:D119-,ORF8:F120-		T29402G		C1218T,T6478C,A7933G,C12493T,C16049T,A17344G,C18395T,C21077T,G24124T,G25855T	1	0	10	11	2585-2834,5261-5263,7017-7035,19298-19558,21162-21551,21733-21761,21768-22037,22056-22074,22080-22280,27528-27803	ORF1a:774-857,ORF1a:1666,ORF1a:2251-2257,ORF1b:1944-2031,ORF1b:2565-2695,ORF7a:45-122,ORF7b:1-16,S:57-67,S:69-159,S:165-171,S:173-240		3000	52.5185	mediocre	1718	10	0
hCoV-19/USA/WI-WSLH-221323/2021|EPI_ISL_6719646|2021-11-02	hCoV-19/USA/WI-WSLH-221323/2021	EPI_ISL_6719646	2021-11-02	21J	AY.103	B.1.617.2.103	21J	Delta	21J (Delta)	14.4385	good	41	7	0	0	1158	0	27	2	0	391	89145	56	29836	0.957195	false	G210T,C241T,T2827C,C3037T,G4181T,C6402T,C7124T,C8986T,G9053T,T9544C,C10029T,C10802T,A11201G,A11332G,C11572T,C12624A,A13653G,A13962G,C14408T,G15451A,C16466T,A17236G,T17784C,C19220T,C21618G,A23403G,C23604G,C24208T,G24410A,C25469T,T26767C,T27291C,C27493T,T27638C,C27752T,C27874T,A28461G,G28881T,G28916T,G29402T,G29742T	28248-28253,28271			M:I82T,N:D63G,N:R203M,N:G215C,N:D377Y,ORF1a:A1306S,ORF1a:P2046L,ORF1a:P2287S,ORF1a:V2930L,ORF1a:T3255I,ORF1a:T3646A,ORF1a:P4120H,ORF1b:P314L,ORF1b:G662S,ORF1b:P1000L,ORF1b:I1257V,ORF1b:A1918V,ORF3a:S26L,ORF7a:P34S,ORF7a:V82A,ORF7a:T120I,ORF7b:T40I,ORF9b:T60A,S:T19R,S:D614G,S:P681R,S:D950N	ORF8:D119-,ORF8:F120-			T27291C|21J	T2827C,T9544C,C10802T,C11572T,C12624A,A13653G,A13962G,T17784C,C27493T	0	1	9	10	654-664,1943-1950,2186-2205,8636-8652,8913,21717-22542,22878-23144,26891-26898	M:123-126,ORF1a:130-133,ORF1a:560-562,ORF1a:641-647,ORF1a:2791-2796,ORF1a:2883,S:52-327,S:439-528		3000	31.7778	mediocre	1158	10	0
hCoV-19/USA/WI-WSLH-221523/2021|EPI_ISL_7263617|2021-11-02	hCoV-19/USA/WI-WSLH-221523/2021	EPI_ISL_7263617	2021-11-02	21J	AY.44	B.1.617.2.44	21J	Delta	21J (Delta)	45.9292	mediocre	45	65	0	1	629	0	31	22	0	264	88942	55	29836	0.974919	false	G210T,C241T,C3037T,G4181T,C6040T,C6402T,C6638T,C7124T,C7926T,C8986T,G9053T,C10029T,C10969T,A11201G,A11332G,C12763T,T14014G,C14408T,G15451A,C16466T,C16726T,G18412A,C19220T,C20646T,C21618G,T22917G,C22995A,A23403G,C23604G,G24410A,C25469T,T26767C,T27638C,C27752T,C27874T,G28073T,G28460A,A28461G,G28881T,G28916T,C29119T,G29402T,G29593T,A29700G,G29742T	22029-22034,27555-27606,28248-28253,28271		ORF7a:72-122	M:I82T,N:D63S,N:R203M,N:G215C,N:D377Y,ORF1a:A1306S,ORF1a:P2046L,ORF1a:H2125Y,ORF1a:P2287S,ORF1a:A2554V,ORF1a:V2930L,ORF1a:T3255I,ORF1a:T3646A,ORF1b:F183V,ORF1b:P314L,ORF1b:G662S,ORF1b:P1000L,ORF1b:H1087Y,ORF1b:V1649I,ORF1b:A1918V,ORF3a:S26L,ORF7b:T40I,ORF8:L60F,ORF9b:T60A,S:T19R,S:R158G,S:L452R,S:T478K,S:D614G,S:P681R,S:D950N	ORF7a:F54-,ORF7a:A55-,ORF7a:L56-,ORF7a:T57-,ORF7a:C58-,ORF7a:F59-,ORF7a:S60-,ORF7a:T61-,ORF7a:Q62-,ORF7a:F63-,ORF7a:A64-,ORF7a:F65-,ORF7a:A66-,ORF7a:C67-,ORF7a:P68-,ORF7a:D69-,ORF7a:G70-,ORF7a:V71-,ORF8:D119-,ORF8:F120-,S:E156-,S:F157-			C6638T|21J,C7926T|21J&21K,C16726T|21J,G28073T|21J	C10969T,C12763T,G18412A,C20646T,G28460A,C29119T,G29593T	0	4	7	11	21717-21996,22311-22542,22878-22900,22904-22909,23052-23061,23067-23144	ORF7a:72-122,S:52-145,S:250-327,S:439-446,S:448-449,S:497-500,S:502-528		3000	12.1852	good	629	10	0
hCoV-19/USA/WI-MHDL-2021110191/2021|EPI_ISL_6864870|2021-11-03	hCoV-19/USA/WI-MHDL-2021110191/2021	EPI_ISL_6864870	2021-11-03	21J	AY.25	B.1.617.2.25	21J	Delta	21J (Delta)	29.4412	good	41	13	0	0	869	0	29	4	0	295	89122	55	29836	0.966893	false	G210T,C222T,C241T,C1108T,C3037T,G4181T,C4320T,C6402T,C7124T,C8986T,G9053T,C10029T,A11201G,A11332G,C11626T,G12801A,C13384T,C14408T,G15451A,C16466T,C19220T,C21618G,G22801T,T22917G,C22995A,A23403G,C23604G,G24410A,C25469T,A25934T,G26107C,T26767C,C26894A,C27498T,C27874T,A28461G,G28881T,G28916T,C29167T,G29402T,G29742T	22029-22034,28248-28253,28271			M:I82T,N:D63G,N:R203M,N:G215C,N:D377Y,ORF1a:A1306S,ORF1a:A1352V,ORF1a:P2046L,ORF1a:P2287S,ORF1a:V2930L,ORF1a:T3255I,ORF1a:T3646A,ORF1a:R4179K,ORF1b:P314L,ORF1b:G662S,ORF1b:P1000L,ORF1b:A1918V,ORF3a:S26L,ORF3a:E181V,ORF3a:E239Q,ORF7b:T40I,ORF9b:T60A,S:T19R,S:R158G,S:L452R,S:T478K,S:D614G,S:P681R,S:D950N	ORF8:D119-,ORF8:F120-,S:E156-,S:F157-			C222T|20E,G12801A|21J,G22801T|21J	C1108T,C4320T,C11626T,C13384T,A25934T,C26894A,C27498T,C29167T	0	3	8	11	19276-19570,19983-19984,21717-21990,27507,27512-27808	ORF1b:1937-2035,ORF1b:2172-2173,ORF7a:38,ORF7a:40-122,ORF7b:1-18,S:52-143		3000	21.0741	good	869	10	0
hCoV-19/USA/WI-MHDL-2021110194/2021|EPI_ISL_6864871|2021-11-03	hCoV-19/USA/WI-MHDL-2021110194/2021	EPI_ISL_6864871	2021-11-03	21J	AY.103	B.1.617.2.103	21J	Delta	21J (Delta)	2.7725	good	38	13	0	0	597	0	29	4	0	202	88621	55	29665	0.970271	false	G210T,C241T,T2827C,C3037T,G4181T,C4423T,C6016T,C6402T,C7124T,T7386C,C8986T,G9053T,C10029T,A11201G,A11332G,C11572T,C12624A,C14408T,G15451A,C16466T,A17236G,C19220T,C21618G,T22917G,C22995A,A23403G,C23604G,C24208T,G24410A,C25469T,C25549T,T26767C,T27291C,C27874T,A28461G,G28881T,G28916T,G29402T	22029-22034,28248-28253,28271			M:I82T,N:D63G,N:R203M,N:G215C,N:D377Y,ORF1a:A1306S,ORF1a:P2046L,ORF1a:P2287S,ORF1a:M2374T,ORF1a:V2930L,ORF1a:T3255I,ORF1a:T3646A,ORF1a:P4120H,ORF1b:P314L,ORF1b:G662S,ORF1b:P1000L,ORF1b:I1257V,ORF1b:A1918V,ORF3a:S26L,ORF3a:L53F,ORF7b:T40I,ORF9b:T60A,S:T19R,S:R158G,S:L452R,S:T478K,S:D614G,S:P681R,S:D950N	ORF8:D119-,ORF8:F120-,S:E156-,S:F157-			T27291C|21J	T2827C,C4423T,C6016T,T7386C,C11572T,C12624A,C25549T	0	1	7	8	19276-19570,21986-21990,27512-27808	ORF1b:1937-2035,ORF7a:40-122,ORF7b:1-18,S:142-143		3000	11	good	597	10	0
hCoV-19/USA/WI-MHDL-2021110296/2021|EPI_ISL_6371361|2021-11-03	hCoV-19/USA/WI-MHDL-2021110296/2021	EPI_ISL_6371361	2021-11-03	21J	AY.39	B.1.617.2.39	21J	Delta	21J (Delta)	1.5625	good	41	13	0	0	274	0	33	4	0	92	89122	55	29836	0.986791	false	G210T,C241T,C337T,C3037T,G3304T,G3433T,G3692T,G4181T,C6402T,C7124T,C8986T,G9053T,C10029T,A11201G,A11332G,C14408T,G15451A,C16466T,A16644G,C19220T,G21372T,C21618G,T22917G,C22995A,A23403G,C23604G,G24410A,C25469T,C26681T,G26754T,T26767C,C27577T,G27604A,T27638C,C27752T,C27874T,A28461G,G28881T,G28916T,G29402T,G29742T	22029-22034,28248-28253,28271			M:G78C,M:I82T,N:D63G,N:R203M,N:G215C,N:D377Y,ORF1a:E1013D,ORF1a:V1143F,ORF1a:A1306S,ORF1a:P2046L,ORF1a:P2287S,ORF1a:V2930L,ORF1a:T3255I,ORF1a:T3646A,ORF1b:P314L,ORF1b:G662S,ORF1b:P1000L,ORF1b:A1918V,ORF1b:Q2635H,ORF3a:S26L,ORF7a:Q62*,ORF7a:V71I,ORF7a:V82A,ORF7a:T120I,ORF7b:T40I,ORF9b:T60A,S:T19R,S:R158G,S:L452R,S:T478K,S:D614G,S:P681R,S:D950N	ORF8:D119-,ORF8:F120-,S:E156-,S:F157-			C26681T|21C&21B&19B	C337T,G3304T,G3433T,G3692T,A16644G,G26754T,C27577T	0	1	7	8	21717-21990	S:52-143		3000	0	good	274	10	0
hCoV-19/USA/WI-MHDL-2021110297/2021|EPI_ISL_6371362|2021-11-03	hCoV-19/USA/WI-MHDL-2021110297/2021	EPI_ISL_6371362	2021-11-03	21J	AY.3	B.1.617.2.3	21J	Delta	21J (Delta)	2.77778	good	43	13	0	0	274	0	35	4	0	92	89114	55	29836	0.986791	false	G210T,C241T,G410T,T1623C,C3037T,G4181T,C6402T,C7124T,C8986T,G9053T,C10029T,A11201G,A11332G,A11456G,C12784T,C14318T,C14408T,G15438T,G15451A,C16466T,C18060T,C19220T,C19763T,C21618G,C22077A,T22917G,C22995A,A23403G,C23604G,G24410A,C25469T,G25855T,T26767C,T27638C,C27752T,C27874T,A28461G,G28881T,G28916T,G29050A,G29402T,C29509T,G29742T	22029-22034,28248-28253,28271			M:I82T,N:D63G,N:R203M,N:G215C,N:D377Y,ORF1a:G49C,ORF1a:I453T,ORF1a:A1306S,ORF1a:P2046L,ORF1a:P2287S,ORF1a:V2930L,ORF1a:T3255I,ORF1a:T3646A,ORF1a:I3731V,ORF1b:T284I,ORF1b:P314L,ORF1b:M657I,ORF1b:G662S,ORF1b:P1000L,ORF1b:A1918V,ORF1b:T2099I,ORF3a:S26L,ORF3a:D155Y,ORF7a:V82A,ORF7a:T120I,ORF7b:T40I,ORF9b:T60A,S:T19R,S:R158G,S:S172Y,S:L452R,S:T478K,S:D614G,S:P681R,S:D950N	ORF8:D119-,ORF8:F120-,S:E156-,S:F157-			C18060T|19B	G410T,T1623C,C12784T,C14318T,G15438T,C19763T,C22077A,G25855T	0	1	8	9	21717-21990	S:52-143		3000	0	good	274	10	0
hCoV-19/USA/WI-MHDL-2021110298/2021|EPI_ISL_6371363|2021-11-03	hCoV-19/USA/WI-MHDL-2021110298/2021	EPI_ISL_6371363	2021-11-03	21J	AY.103	B.1.617.2.103	21J	Delta	21J (Delta)	1.1616	good	39	13	0	0	591	0	32	4	0	200	89130	55	29836	0.97619	false	G210T,C241T,C3037T,C3096T,G4181T,C6402T,G6439C,C7124T,C8986T,G9053T,C10029T,A11201G,A11332G,C14408T,G15451A,C16466T,A17236G,C19220T,C21618G,G21987A,C22624T,T22917G,C22995A,A23403G,C23604G,C24208T,G24410A,C25006T,C25469T,T25969G,T26767C,T27638C,C27752T,C27874T,A28461G,G28881T,G28916T,G29402T,G29742T	22029-22034,28248-28253,28271			M:I82T,N:D63G,N:R203M,N:G215C,N:D377Y,ORF1a:S944L,ORF1a:A1306S,ORF1a:P2046L,ORF1a:Q2058H,ORF1a:P2287S,ORF1a:V2930L,ORF1a:T3255I,ORF1a:T3646A,ORF1b:P314L,ORF1b:G662S,ORF1b:P1000L,ORF1b:I1257V,ORF1b:A1918V,ORF3a:S26L,ORF3a:W193G,ORF7a:V82A,ORF7a:T120I,ORF7b:T40I,ORF9b:T60A,S:T19R,S:G142D,S:R158G,S:L452R,S:T478K,S:D614G,S:P681R,S:D950N	ORF8:D119-,ORF8:F120-,S:E156-,S:F157-				C3096T,G6439C,C22624T,C25006T,T25969G	0	0	5	5	8636-8641,8877-8913,10738-11022,13364-13625,21785	ORF1a:2791-2792,ORF1a:2871-2883,ORF1a:3491-3586,ORF1a:4367-4401,ORF1b:1-53,S:75		3000	10.7778	good	591	10	0
hCoV-19/USA/WI-MHDL-2021110299/2021|EPI_ISL_6371364|2021-11-03	hCoV-19/USA/WI-MHDL-2021110299/2021	EPI_ISL_6371364	2021-11-03	21J	AY.100	B.1.617.2.100	21J	Delta	21J (Delta)	28.524	good	44	7	0	0	1670	0	32	2	0	560	89136	55	29836	0.940106	false	G210T,C241T,A532T,C2508T,C3037T,G4181T,C5812T,C6402T,C7124T,C8986T,G9053T,C9133A,C9559T,C10029T,A11201G,A11332G,C13329T,C14408T,C15240T,G15451A,C16466T,G17122T,G17427T,C19220T,C21618G,T22917G,C22949T,C22995A,A23403G,C23604G,G24410A,C25469T,T26767C,T27638C,C27752T,C27874T,A27985T,T28007C,C28432T,A28461G,G28881T,G28916T,G29402T,G29742T	28248-28253,28271			M:I82T,N:D63G,N:R203M,N:G215C,N:D377Y,ORF1a:P748L,ORF1a:A1306S,ORF1a:P2046L,ORF1a:P2287S,ORF1a:V2930L,ORF1a:T3255I,ORF1a:T3646A,ORF1a:T4355I,ORF1b:P314L,ORF1b:G662S,ORF1b:P1000L,ORF1b:A1219S,ORF1b:A1918V,ORF3a:S26L,ORF7a:V82A,ORF7a:T120I,ORF7b:T40I,ORF8:Y31F,ORF9b:S50L,ORF9b:T60A,S:T19R,S:L452R,S:P463S,S:T478K,S:D614G,S:P681R,S:D950N	ORF8:D119-,ORF8:F120-			C28432T|21J	A532T,C2508T,C5812T,C9133A,C13329T,G17427T,C22949T,A27985T	0	1	8	9	2569-2850,9246-9502,13364-13625,19276-19570,21717-22290	ORF1a:768-862,ORF1a:2994-3079,ORF1a:4367-4401,ORF1b:1-53,ORF1b:1937-2035,S:52-243		3000	50.7407	mediocre	1670	10	0
hCoV-19/USA/WI-MHDL-2021110300/2021|EPI_ISL_6371365|2021-11-03	hCoV-19/USA/WI-MHDL-2021110300/2021	EPI_ISL_6371365	2021-11-03	21J	AY.119	B.1.617.2.119	21J	Delta	21J (Delta)	3.26672	good	41	13	0	0	788	0	35	4	0	266	89122	55	29836	0.969602	false	G210T,C241T,C3037T,G4181T,C6402T,C8829T,C8986T,G9053T,C10029T,A11201G,A11332G,C12756T,C14408T,G15451A,C16466T,T17796C,G19006T,C19220T,C21618G,C21846T,G21987A,T22917G,C22995A,A23403G,C23604G,C23987T,G24193T,G24410A,C25469T,G25654A,G25906T,G26730T,T26767C,T27638C,C27752T,C27874T,A28461G,G28881T,G28916T,G29402T,G29742T	22029-22034,28248-28253,28271			M:V70F,M:I82T,N:D63G,N:R203M,N:G215C,N:D377Y,ORF1a:A1306S,ORF1a:P2046L,ORF1a:A2855V,ORF1a:V2930L,ORF1a:T3255I,ORF1a:T3646A,ORF1a:T4164I,ORF1b:P314L,ORF1b:G662S,ORF1b:P1000L,ORF1b:A1847S,ORF1b:A1918V,ORF3a:S26L,ORF3a:V88I,ORF3a:G172C,ORF7a:V82A,ORF7a:T120I,ORF7b:T40I,ORF9b:T60A,S:T19R,S:T95I,S:G142D,S:R158G,S:L452R,S:T478K,S:D614G,S:P681R,S:P809S,S:D950N	ORF8:D119-,ORF8:F120-,S:E156-,S:F157-				C12756T,T17796C,C23987T,G24193T,G25654A,G25906T,G26730T	0	0	7	7	3913,7093-7332,10738-11022,13364-13625	ORF1a:1216,ORF1a:2276-2356,ORF1a:3491-3586,ORF1a:4367-4401,ORF1b:1-53		3000	18.0741	good	788	10	0
hCoV-19/USA/WI-MHDL-2021110301/2021|EPI_ISL_6371366|2021-11-03	hCoV-19/USA/WI-MHDL-2021110301/2021	EPI_ISL_6371366	2021-11-03	21J	AY.3	B.1.617.2.3	21J	Delta	21J (Delta)	26.4272	good	33	13	0	0	1688	0	26	4	0	569	88641	55	29665	0.933786	false	G210T,C241T,C3037T,G4181T,C6196T,C7124T,C8986T,G9053T,C10029T,A11201G,A11332G,A11456G,A11595G,C14408T,G15451A,C16466T,C19220T,C19884T,C21618G,A23403G,C23604G,G24410A,C25469T,T26767C,T27638C,C27752T,C27874T,A28461G,G28881T,G28916T,G29050A,G29402T,C29509T	22029-22034,28248-28253,28271			M:I82T,N:D63G,N:R203M,N:G215C,N:D377Y,ORF1a:A1306S,ORF1a:P2287S,ORF1a:V2930L,ORF1a:T3255I,ORF1a:T3646A,ORF1a:I3731V,ORF1a:Q3777R,ORF1b:P314L,ORF1b:G662S,ORF1b:P1000L,ORF1b:A1918V,ORF3a:S26L,ORF7a:V82A,ORF7a:T120I,ORF7b:T40I,ORF9b:T60A,S:T19R,S:R158G,S:D614G,S:P681R,S:D950N	ORF8:D119-,ORF8:F120-,S:E156-,S:F157-				C6196T,A11595G,C19884T	0	0	3	3	2569-2850,6248-6495,7272-7332,8636-8913,10738-11022,13364-13625,16986,21987-21990,22878-23144	ORF1a:768-862,ORF1a:1995-2077,ORF1a:2336-2356,ORF1a:2791-2883,ORF1a:3491-3586,ORF1a:4367-4401,ORF1b:1-53,ORF1b:1173,S:142-143,S:439-528		3000	51.4074	mediocre	1688	10	0
hCoV-19/USA/WI-MHDL-2021110312/2021|EPI_ISL_6491507|2021-11-03	hCoV-19/USA/WI-MHDL-2021110312/2021	EPI_ISL_6491507	2021-11-03	21J	AY.100	B.1.617.2.100	21J	Delta	21J (Delta)	2.5625	good	43	13	0	0	570	0	34	4	0	192	89114	55	29836	0.976892	false	G210T,C241T,C3037T,G4181T,C6402T,C7124T,C8986T,G9053T,C9559T,C10029T,A11201G,A11332G,C14408T,C15240T,G15451A,C16466T,C16954T,G17122T,C19220T,C21618G,T22917G,G22936A,C22995A,A23403G,C23604G,G24410A,C25469T,G25696C,A25744G,T26767C,T27638C,C27752T,C27874T,A27985T,T28007C,A28365C,C28432T,A28461G,A28880G,G28881T,G28916T,G29402T,G29742T	22029-22034,28248-28253,28271			M:I82T,N:E31A,N:D63G,N:R203V,N:G215C,N:D377Y,ORF1a:A1306S,ORF1a:P2046L,ORF1a:P2287S,ORF1a:V2930L,ORF1a:T3255I,ORF1a:T3646A,ORF1b:P314L,ORF1b:G662S,ORF1b:P1000L,ORF1b:A1219S,ORF1b:A1918V,ORF3a:S26L,ORF3a:E102Q,ORF3a:I118V,ORF7a:V82A,ORF7a:T120I,ORF7b:T40I,ORF8:Y31F,ORF9b:N28H,ORF9b:S50L,ORF9b:T60A,S:T19R,S:R158G,S:L452R,S:T478K,S:D614G,S:P681R,S:D950N	ORF8:D119-,ORF8:F120-,S:E156-,S:F157-			C28432T|21J	C16954T,G22936A,G25696C,A25744G,A27985T,A28365C,A28880G	0	1	7	8	9416,19276-19570,21717-21990	ORF1a:3051,ORF1b:1937-2035,S:52-143		3000	10	good	570	10	0
hCoV-19/USA/WI-MHDL-2021110313/2021|EPI_ISL_6491508|2021-11-03	hCoV-19/USA/WI-MHDL-2021110313/2021	EPI_ISL_6491508	2021-11-03	21J	AY.103	B.1.617.2.103	21J	Delta	21J (Delta)	1.5625	good	41	13	0	0	276	0	31	4	0	93	89122	55	29836	0.986724	false	G210T,C241T,C3037T,G4181T,C6402T,A6907C,C7124T,C8986T,G9053T,C10029T,A11201G,A11332G,C14408T,G15451A,C16466T,A17236G,A18360G,C19170T,C19220T,C21618G,T22917G,C22995A,A23403G,G23593T,C23604G,C24208T,G24410A,C25469T,C25702T,T26767C,T27638C,C27752T,C27874T,C28256T,A28461G,C28606T,G28881T,G28895T,G28916T,G29402T,G29742T	22029-22034,28248-28253,28271			M:I82T,N:D63G,N:R203M,N:A208S,N:G215C,N:D377Y,ORF1a:A1306S,ORF1a:P2046L,ORF1a:P2287S,ORF1a:V2930L,ORF1a:T3255I,ORF1a:T3646A,ORF1b:P314L,ORF1b:G662S,ORF1b:P1000L,ORF1b:I1257V,ORF1b:A1918V,ORF3a:S26L,ORF3a:P104S,ORF7a:V82A,ORF7a:T120I,ORF7b:T40I,ORF9b:T60A,S:T19R,S:R158G,S:L452R,S:T478K,S:D614G,S:Q677H,S:P681R,S:D950N	ORF8:D119-,ORF8:F120-,S:E156-,S:F157-			G23593T|20D	A6907C,A18360G,C19170T,C25702T,C28256T,C28606T,G28895T	0	1	7	8	21717-21990,22010-22011	S:52-143,S:150		3000	0	good	276	10	0
hCoV-19/USA/WI-MHDL-2021110314/2021|EPI_ISL_6491509|2021-11-03	hCoV-19/USA/WI-MHDL-2021110314/2021	EPI_ISL_6491509	2021-11-03	21J	AY.100	B.1.617.2.100	21J	Delta	21J (Delta)	5.37223	good	43	13	0	0	827	0	34	4	0	278	89114	55	29836	0.968297	false	G210T,C241T,C3037T,G4181T,C6402T,C7124T,C8986T,G9053T,C9559T,C10029T,A11201G,A11332G,C14408T,C15240T,G15451A,C16466T,C16954T,G17122T,C19220T,C21618G,T22917G,G22936A,C22995A,A23403G,C23604G,G24410A,C25469T,G25696C,A25744G,T26767C,T27638C,C27752T,C27874T,A27985T,T28007C,A28365C,C28432T,A28461G,A28880G,G28881T,G28916T,G29402T,G29742T	22029-22034,28248-28253,28271			M:I82T,N:E31A,N:D63G,N:R203V,N:G215C,N:D377Y,ORF1a:A1306S,ORF1a:P2046L,ORF1a:P2287S,ORF1a:V2930L,ORF1a:T3255I,ORF1a:T3646A,ORF1b:P314L,ORF1b:G662S,ORF1b:P1000L,ORF1b:A1219S,ORF1b:A1918V,ORF3a:S26L,ORF3a:E102Q,ORF3a:I118V,ORF7a:V82A,ORF7a:T120I,ORF7b:T40I,ORF8:Y31F,ORF9b:N28H,ORF9b:S50L,ORF9b:T60A,S:T19R,S:R158G,S:L452R,S:T478K,S:D614G,S:P681R,S:D950N	ORF8:D119-,ORF8:F120-,S:E156-,S:F157-			C28432T|21J	C16954T,G22936A,G25696C,A25744G,A27985T,A28365C,A28880G	0	1	7	8	9246-9502,19276-19570,20718,21717-21990	ORF1a:2994-3079,ORF1b:1937-2035,ORF1b:2417,S:52-143		3000	19.5185	good	827	10	0
hCoV-19/USA/WI-MHDL-2021110315/2021|EPI_ISL_6491510|2021-11-03	hCoV-19/USA/WI-MHDL-2021110315/2021	EPI_ISL_6491510	2021-11-03	21J	AY.103	B.1.617.2.103	21J	Delta	21J (Delta)	17.3561	good	41	13	0	0	790	0	32	4	0	265	89122	55	29836	0.969535	false	G210T,C241T,G2155T,C3037T,G4181T,C6402T,C7124T,C8986T,G9053T,C10029T,A11201G,A11332G,C11572T,C14408T,C14724T,G15451A,T15939C,C16466T,A17236G,C19220T,C21618G,T22917G,C22995A,A23403G,C23604G,C24208T,G24410A,C25469T,T26767C,T27291C,C27527T,T27638C,C27752T,C27874T,C28236A,G28378T,A28461G,G28881T,G28916T,G29402T,G29742T	22029-22034,28248-28253,28271			M:I82T,N:D63G,N:R203M,N:G215C,N:D377Y,ORF1a:W630C,ORF1a:A1306S,ORF1a:P2046L,ORF1a:P2287S,ORF1a:V2930L,ORF1a:T3255I,ORF1a:T3646A,ORF1b:P314L,ORF1b:G662S,ORF1b:P1000L,ORF1b:I1257V,ORF1b:A1918V,ORF3a:S26L,ORF7a:P45L,ORF7a:V82A,ORF7a:T120I,ORF7b:T40I,ORF8:R115S,ORF9b:R32L,ORF9b:T60A,S:T19R,S:R158G,S:L452R,S:T478K,S:D614G,S:P681R,S:D950N	ORF8:D119-,ORF8:F120-,S:E156-,S:F157-			T15939C|23A&22F&23B,T27291C|21J,C27527T|21J	G2155T,C11572T,C14724T,C28236A,G28378T	0	3	5	8	11669-11889,19276-19570,21717-21990	ORF1a:3802-3875,ORF1b:1937-2035,S:52-143		3000	18.1481	good	790	10	0
hCoV-19/USA/WI-MHDL-2021110316/2021|EPI_ISL_6491511|2021-11-03	hCoV-19/USA/WI-MHDL-2021110316/2021	EPI_ISL_6491511	2021-11-03	21J	AY.39	B.1.617.2.39	21J	Delta	21J (Delta)	1.68705	good	40	13	0	0	569	0	33	4	0	191	89126	55	29836	0.976925	false	G210T,C241T,G1820A,C3037T,G3304T,G3433T,G3692T,T3862C,G4181T,C6402T,C7124T,C8986T,G9053T,C10029T,A11201G,A11332G,C14408T,G15451A,C16466T,A16644G,C19220T,G20274T,G21372T,C21618G,T22917G,C22995A,A23403G,C23604G,G24410A,C25469T,T26767C,G27604A,T27638C,C27752T,C27874T,A28461G,G28881T,G28916T,G29402T,G29742T	22029-22034,28248-28253,28271			M:I82T,N:D63G,N:R203M,N:G215C,N:D377Y,ORF1a:G519S,ORF1a:E1013D,ORF1a:V1143F,ORF1a:A1306S,ORF1a:P2046L,ORF1a:P2287S,ORF1a:V2930L,ORF1a:T3255I,ORF1a:T3646A,ORF1b:P314L,ORF1b:G662S,ORF1b:P1000L,ORF1b:A1918V,ORF1b:M2269I,ORF1b:Q2635H,ORF3a:S26L,ORF7a:V71I,ORF7a:V82A,ORF7a:T120I,ORF7b:T40I,ORF9b:T60A,S:T19R,S:R158G,S:L452R,S:T478K,S:D614G,S:P681R,S:D950N	ORF8:D119-,ORF8:F120-,S:E156-,S:F157-			G1820A|21J	G3304T,G3433T,G3692T,T3862C,A16644G,G20274T	0	1	6	7	19276-19570,21717-21990	ORF1b:1937-2035,S:52-143		3000	9.96296	good	569	10	0
hCoV-19/USA/WI-MHDL-2021110317/2021|EPI_ISL_6491512|2021-11-03	hCoV-19/USA/WI-MHDL-2021110317/2021	EPI_ISL_6491512	2021-11-03	21J	AY.44	B.1.617.2.44	21J	Delta	21J (Delta)	24.9479	good	42	13	0	0	836	0	35	4	0	281	89118	55	29836	0.967997	false	G210T,C241T,C3037T,G4181T,C6040T,C6402T,C7124T,C7926T,C8986T,G9053T,C10029T,G11083T,A11201G,A11332G,T14014G,C14408T,G15451A,T16239C,C16466T,C19220T,G20839A,C21618G,C21638T,A23403G,C23520T,C23604G,G23868T,G24410A,C25469T,G25906T,T26767C,G27281T,T27638C,C27752T,C27874T,G28028T,A28461G,G28881T,G28916T,G29402T,A29700G,G29742T	22029-22034,28248-28253,28271			M:I82T,N:D63G,N:R203M,N:G215C,N:D377Y,ORF1a:A1306S,ORF1a:P2046L,ORF1a:P2287S,ORF1a:A2554V,ORF1a:V2930L,ORF1a:T3255I,ORF1a:L3606F,ORF1a:T3646A,ORF1b:F183V,ORF1b:P314L,ORF1b:G662S,ORF1b:P1000L,ORF1b:A1918V,ORF1b:V2458I,ORF3a:S26L,ORF3a:G172C,ORF6:W27L,ORF7a:V82A,ORF7a:T120I,ORF7b:T40I,ORF8:W45C,ORF9b:T60A,S:T19R,S:P26S,S:R158G,S:D614G,S:A653V,S:P681R,S:G769V,S:D950N	ORF8:D119-,ORF8:F120-,S:E156-,S:F157-			C7926T|21J&21K,G11083T|21J&19A,C21638T|20J	T16239C,G20839A,C23520T,G23868T,G25906T,G27281T,G28028T	0	3	7	10	19276-19570,21717-21990,22878-23144	ORF1b:1937-2035,S:52-143,S:439-528		3000	19.8519	good	836	10	0
hCoV-19/USA/WI-MHDL-2021110318/2021|EPI_ISL_6491513|2021-11-03	hCoV-19/USA/WI-MHDL-2021110318/2021	EPI_ISL_6491513	2021-11-03	21J	AY.3.1	B.1.617.2.3.1	21J	Delta	21J (Delta)	0.783553	good	42	13	0	0	539	0	31	4	0	181	88605	55	29665	0.97221	false	G210T,C241T,C3037T,G3644T,G4181T,C6402T,C7124T,C8986T,G9053T,C10029T,A11201G,A11332G,A11456G,C14408T,G15451A,C16466T,C18115T,C19220T,C20199T,C21618G,T22917G,C22995A,T23284C,A23403G,C23604G,G24410A,C25339T,C25469T,C25513A,T26767C,T27638C,C27752T,C27874T,A28461G,C28657T,G28881T,T28888C,G28916T,G29050A,G29402T,C29509T,C29580T	22029-22034,28248-28253,28271			M:I82T,N:D63G,N:R203M,N:G215C,N:D377Y,ORF1a:D1127Y,ORF1a:A1306S,ORF1a:P2046L,ORF1a:P2287S,ORF1a:V2930L,ORF1a:T3255I,ORF1a:T3646A,ORF1a:I3731V,ORF1b:P314L,ORF1b:G662S,ORF1b:P1000L,ORF1b:H1550Y,ORF1b:A1918V,ORF3a:S26L,ORF3a:L41I,ORF7a:V82A,ORF7a:T120I,ORF7b:T40I,ORF9b:T60A,S:T19R,S:R158G,S:L452R,S:T478K,S:D614G,S:P681R,S:D950N	ORF8:D119-,ORF8:F120-,S:E156-,S:F157-			C28657T|19B&21H	C25513A,T28888C,C29580T	0	1	3	4	20232-20496,21717-21990	ORF1b:2255-2343,S:52-143		3000	8.85185	good	539	10	0
hCoV-19/USA/WI-MHDL-2021110319/2021|EPI_ISL_6491514|2021-11-03	hCoV-19/USA/WI-MHDL-2021110319/2021	EPI_ISL_6491514	2021-11-03	21J	AY.103	B.1.617.2.103	21J	Delta	21J (Delta)	6.07133	good	42	13	0	0	790	0	32	4	0	265	89118	55	29836	0.969535	false	G210T,C241T,T2827C,C3037T,G4105T,G4181T,T6096C,C6402T,C7124T,C8986T,G9053T,C10029T,G10642T,A11201G,A11332G,C11572T,C12624A,C14408T,G15451A,C16466T,A17236G,C19154T,C19220T,T21087C,C21618G,T22917G,C22995A,A23403G,C23604G,C24208T,G24410A,C25469T,T26767C,T27291C,T27638C,C27752T,C27874T,A28461G,G28881T,G28916T,G29402T,G29742T	22029-22034,28248-28253,28271			M:I82T,N:D63G,N:R203M,N:G215C,N:D377Y,ORF1a:K1280N,ORF1a:A1306S,ORF1a:L1944S,ORF1a:P2046L,ORF1a:P2287S,ORF1a:V2930L,ORF1a:T3255I,ORF1a:T3646A,ORF1a:P4120H,ORF1b:P314L,ORF1b:G662S,ORF1b:P1000L,ORF1b:I1257V,ORF1b:T1896I,ORF1b:A1918V,ORF3a:S26L,ORF7a:V82A,ORF7a:T120I,ORF7b:T40I,ORF9b:T60A,S:T19R,S:R158G,S:L452R,S:T478K,S:D614G,S:P681R,S:D950N	ORF8:D119-,ORF8:F120-,S:E156-,S:F157-			T27291C|21J	T2827C,G4105T,T6096C,G10642T,C11572T,C12624A,C19154T,T21087C	0	1	8	9	11669-11889,19276-19570,21717-21990	ORF1a:3802-3875,ORF1b:1937-2035,S:52-143		3000	18.1481	good	790	10	0
hCoV-19/USA/WI-MHDL-2021110321/2021|EPI_ISL_6491515|2021-11-03	hCoV-19/USA/WI-MHDL-2021110321/2021	EPI_ISL_6491515	2021-11-03	21J	AY.44	B.1.617.2.44	21J	Delta	21J (Delta)	57.2426	mediocre	45	13	0	0	569	0	33	4	0	191	89106	55	29836	0.976925	false	G210T,C222T,C241T,C3037T,G4181T,C6040T,C6402T,C6638T,C7124T,C7926T,C8986T,G9053T,C10029T,A11201G,A11332G,T14014G,C14408T,G15451A,C16466T,C16726T,C19220T,A20127G,C21618G,T22057C,T22917G,C22995A,A23403G,C23604G,G24410A,A25216G,C25469T,C25611T,G26428T,T26767C,C27630T,T27638C,C27752T,C27874T,G28073T,A28461G,G28881T,G28916T,G29402T,A29700G,G29742T	22029-22034,28248-28253,28271			E:V62F,M:I82T,N:D63G,N:R203M,N:G215C,N:D377Y,ORF1a:A1306S,ORF1a:P2046L,ORF1a:H2125Y,ORF1a:P2287S,ORF1a:A2554V,ORF1a:V2930L,ORF1a:T3255I,ORF1a:T3646A,ORF1b:F183V,ORF1b:P314L,ORF1b:G662S,ORF1b:P1000L,ORF1b:H1087Y,ORF1b:A1918V,ORF3a:S26L,ORF7a:V82A,ORF7a:T120I,ORF7b:T40I,ORF8:L60F,ORF9b:T60A,S:T19R,S:R158G,S:L452R,S:T478K,S:D614G,S:P681R,S:D950N	ORF8:D119-,ORF8:F120-,S:E156-,S:F157-			C222T|20E,C6638T|21J,C7926T|21J&21K,C16726T|21J,G28073T|21J	A20127G,T22057C,A25216G,C25611T,G26428T,C27630T	0	5	6	11	19276-19570,21717-21990	ORF1b:1937-2035,S:52-143		3000	9.96296	good	569	10	0
hCoV-19/USA/WI-MHDL-2021110466/2021|EPI_ISL_6861974|2021-11-03	hCoV-19/USA/WI-MHDL-2021110466/2021	EPI_ISL_6861974	2021-11-03	21J	AY.103	B.1.617.2.103	21J	Delta	21J (Delta)	1.5625	good	38	13	0	0	261	0	31	4	0	88	89242	39	29856	0.988429	false	G210T,C241T,C3037T,C3096T,G4181T,C6402T,G6439C,C7124T,C8986T,G9053T,C10029T,A11201G,A11332G,C14408T,G15451A,C16466T,A17236G,C19220T,C21618G,G21987A,C22624T,T22917G,C22995A,A23403G,C23604G,C24208T,G24410A,C25006T,C25469T,T25969G,T26767C,C27752T,C27874T,A28461G,G28881T,G28916T,G29402T,G29742T	22029-22034,28248-28253,28271			M:I82T,N:D63G,N:R203M,N:G215C,N:D377Y,ORF1a:S944L,ORF1a:A1306S,ORF1a:P2046L,ORF1a:Q2058H,ORF1a:P2287S,ORF1a:V2930L,ORF1a:T3255I,ORF1a:T3646A,ORF1b:P314L,ORF1b:G662S,ORF1b:P1000L,ORF1b:I1257V,ORF1b:A1918V,ORF3a:S26L,ORF3a:W193G,ORF7a:T120I,ORF7b:T40I,ORF9b:T60A,S:T19R,S:G142D,S:R158G,S:L452R,S:T478K,S:D614G,S:P681R,S:D950N	ORF8:D119-,ORF8:F120-,S:E156-,S:F157-		C27638T		C3096T,G6439C,C22624T,C25006T,T25969G	1	0	5	6	19294-19553,27636	ORF1b:1943-2029,ORF7a:81		3000	0	good	261	10	0
hCoV-19/USA/WI-MHDL-2021110467/2021|EPI_ISL_6861975|2021-11-03	hCoV-19/USA/WI-MHDL-2021110467/2021	EPI_ISL_6861975	2021-11-03	21J	AY.103	B.1.617.2.103	21J	Delta	21J (Delta)	21.0069	good	43	13	0	0	257	0	34	4	0	87	89207	39	29851	0.988396	false	G210T,C241T,G242T,C1059T,C3037T,G4181T,C6402T,C7124T,A8420G,C8986T,G9053T,C10029T,A11201G,A11332G,C11572T,C11950T,C14408T,G14452A,G15451A,C16466T,A17236G,C19220T,C21618G,C21639T,T22917G,C22995A,A23403G,C23604G,C23758T,C24208T,G24410A,C25469T,T26767C,G27327T,G27514T,T27638C,C27752T,C27874T,A28461G,G28881T,G28916T,G29402T,G29742T	22029-22034,28248-28253,28271			M:I82T,N:D63G,N:R203M,N:G215C,N:D377Y,ORF1a:T265I,ORF1a:A1306S,ORF1a:P2046L,ORF1a:P2287S,ORF1a:M2719V,ORF1a:V2930L,ORF1a:T3255I,ORF1a:T3646A,ORF1b:P314L,ORF1b:V329I,ORF1b:G662S,ORF1b:P1000L,ORF1b:I1257V,ORF1b:A1918V,ORF3a:S26L,ORF6:K42N,ORF7a:E41*,ORF7a:V82A,ORF7a:T120I,ORF7b:T40I,ORF9b:T60A,S:T19R,S:P26L,S:R158G,S:L452R,S:T478K,S:D614G,S:P681R,S:D950N	ORF8:D119-,ORF8:F120-,S:E156-,S:F157-		A21987G	C1059T|20G&20C&21C&21F&20H	G242T,A8420G,C11572T,C11950T,G14452A,C21639T,C23758T,G27327T,G27514T	1	1	9	11	19298-19553,27219	ORF1b:1944-2029,ORF6:6		3000	0	good	257	10	0
hCoV-19/USA/WI-MHDL-2021110468/2021|EPI_ISL_6861976|2021-11-03	hCoV-19/USA/WI-MHDL-2021110468/2021	EPI_ISL_6861976	2021-11-03	21I	B.1.617.2	B.1.617.2	21I	Delta	21I (Delta)	1.5625	good	39	13	0	0	264	0	30	4	0	89	89229	39	29853	0.988229	false	G210T,C241T,C3037T,C4331T,C5184T,A5584G,C6449T,C9430T,C9891T,G11335T,T11418C,C11514T,C11564T,C12885T,C13019T,G13445A,G13960A,C14408T,G15451A,C16466T,T18876C,C21618G,G21987A,C22227T,T22917G,C22995A,A23403G,C23604G,G24410A,C25469T,C26447T,T26767C,T27638C,C27752T,A28461G,C28606T,G28881T,G29402T,G29742T	22029-22034,28248-28253,28271			E:S68F,M:I82T,N:D63G,N:R203M,N:D377Y,ORF1a:P1640L,ORF1a:L2062F,ORF1a:A3209V,ORF1a:V3718A,ORF1a:T3750I,ORF1a:P3767S,ORF1a:T4207I,ORF1a:A4394T,ORF1b:V165I,ORF1b:P314L,ORF1b:G662S,ORF1b:P1000L,ORF3a:S26L,ORF7a:V82A,ORF7a:T120I,ORF9b:T60A,S:T19R,S:G142D,S:R158G,S:A222V,S:L452R,S:T478K,S:D614G,S:P681R,S:D950N	ORF8:D119-,ORF8:F120-,S:E156-,S:F157-				C4331T,C6449T,C9430T,G11335T,C11564T,C12885T,G13445A,G13960A,T18876C,C26447T,C28606T	0	0	11	11	19293-19556	ORF1b:1942-2030		3000	0	good	264	10	0
hCoV-19/USA/WI-MHDL-2021110197/2021|EPI_ISL_6864874|2021-11-04	hCoV-19/USA/WI-MHDL-2021110197/2021	EPI_ISL_6864874	2021-11-04	21J	AY.25	B.1.617.2.25	21J	Delta	21J (Delta)	29.41	good	41	13	0	0	867	0	29	4	0	293	89122	55	29836	0.96696	false	G210T,C222T,C241T,C1108T,C3037T,G4181T,C4320T,C6402T,C7124T,C8986T,G9053T,C10029T,A11201G,A11332G,C11626T,G12801A,C13384T,C14408T,G15451A,C16466T,C19220T,C21618G,G22801T,T22917G,C22995A,A23403G,C23604G,G24410A,C25469T,A25934T,G26107C,T26767C,C26894A,C27498T,C27874T,A28461G,G28881T,G28916T,C29167T,G29402T,G29742T	22029-22034,28248-28253,28271			M:I82T,N:D63G,N:R203M,N:G215C,N:D377Y,ORF1a:A1306S,ORF1a:A1352V,ORF1a:P2046L,ORF1a:P2287S,ORF1a:V2930L,ORF1a:T3255I,ORF1a:T3646A,ORF1a:R4179K,ORF1b:P314L,ORF1b:G662S,ORF1b:P1000L,ORF1b:A1918V,ORF3a:S26L,ORF3a:E181V,ORF3a:E239Q,ORF7b:T40I,ORF9b:T60A,S:T19R,S:R158G,S:L452R,S:T478K,S:D614G,S:P681R,S:D950N	ORF8:D119-,ORF8:F120-,S:E156-,S:F157-			C222T|20E,G12801A|21J,G22801T|21J	C1108T,C4320T,C11626T,C13384T,A25934T,C26894A,C27498T,C29167T	0	3	8	11	19276-19570,21717-21990,27507,27512-27808	ORF1b:1937-2035,ORF7a:38,ORF7a:40-122,ORF7b:1-18,S:52-143		3000	21	good	867	10	0
hCoV-19/USA/WI-MHDL-2021110287/2021|EPI_ISL_6371355|2021-11-04	hCoV-19/USA/WI-MHDL-2021110287/2021	EPI_ISL_6371355	2021-11-04	21J	AY.3	B.1.617.2.3	21J	Delta	21J (Delta)	9.96309	good	40	7	0	0	1122	0	29	2	0	376	88639	55	29665	0.952714	false	G210T,C241T,T2126C,C2798T,C3037T,C3717T,G4181T,C6402T,C7124T,C8986T,G9053T,C10029T,A11201G,A11332G,A11456G,C14408T,G15451A,C16466T,C19220T,C21614T,C21618G,C22624T,T22917G,C22995A,T23284C,A23403G,C23604G,G24410A,C25339T,C25469T,T26767C,T27638C,C27752T,C27874T,A28461G,G29050A,C29272T,G29402T,C29485T,C29509T	28248-28253,28271			M:I82T,N:D63G,N:D377Y,ORF1a:Y621H,ORF1a:L845F,ORF1a:A1151V,ORF1a:A1306S,ORF1a:P2046L,ORF1a:P2287S,ORF1a:V2930L,ORF1a:T3255I,ORF1a:T3646A,ORF1a:I3731V,ORF1b:P314L,ORF1b:G662S,ORF1b:P1000L,ORF1b:A1918V,ORF3a:S26L,ORF7a:V82A,ORF7a:T120I,ORF7b:T40I,ORF9b:T60A,S:L18F,S:T19R,S:L452R,S:T478K,S:D614G,S:P681R,S:D950N	ORF8:D119-,ORF8:F120-			C21614T|20J&20E&20H	T2126C,C2798T,C3717T,C22624T,C29272T,C29485T	0	1	6	7	19276-19570,21717-22290,28757-29007,29037-29038	N:162-245,N:255,ORF1b:1937-2035,S:52-243		3000	30.4444	mediocre	1122	10	0
hCoV-19/USA/WI-MHDL-2021110305/2021|EPI_ISL_6491500|2021-11-04	hCoV-19/USA/WI-MHDL-2021110305/2021	EPI_ISL_6491500	2021-11-04	21J	AY.103	B.1.617.2.103	21J	Delta	21J (Delta)	9.49955	good	39	13	0	0	569	0	31	4	0	191	89130	55	29836	0.976925	false	G210T,C241T,C3037T,C3653T,G4181T,C6402T,G6421T,C7124T,C8986T,G9053T,C10029T,A11201G,A11332G,C14408T,C15240T,G15451A,C16466T,A17236G,C19220T,C21618G,T22917G,C22995A,A23403G,C23604G,C24208T,G24410A,C25469T,T26767C,T27291C,C27532T,T27638C,C27752T,C27874T,A28461G,G28881T,G28916T,A29355C,G29402T,G29742T	22029-22034,28248-28253,28271			M:I82T,N:D63G,N:R203M,N:G215C,N:K361T,N:D377Y,ORF1a:L1130F,ORF1a:A1306S,ORF1a:P2046L,ORF1a:P2287S,ORF1a:V2930L,ORF1a:T3255I,ORF1a:T3646A,ORF1b:P314L,ORF1b:G662S,ORF1b:P1000L,ORF1b:I1257V,ORF1b:A1918V,ORF3a:S26L,ORF7a:H47Y,ORF7a:V82A,ORF7a:T120I,ORF7b:T40I,ORF9b:T60A,S:T19R,S:R158G,S:L452R,S:T478K,S:D614G,S:P681R,S:D950N	ORF8:D119-,ORF8:F120-,S:E156-,S:F157-			C15240T|21K&21J,T27291C|21J,C27532T|22B	C3653T,G6421T,A29355C	0	3	3	6	19276-19570,21717-21990	ORF1b:1937-2035,S:52-143		3000	9.96296	good	569	10	0
hCoV-19/USA/WI-MHDL-2021110322/2021|EPI_ISL_6491516|2021-11-04	hCoV-19/USA/WI-MHDL-2021110322/2021	EPI_ISL_6491516	2021-11-04	21J	AY.103	B.1.617.2.103	21J	Delta	21J (Delta)	0.173611	good	39	13	0	0	274	0	30	4	0	92	89130	55	29836	0.986791	false	G210T,C241T,T2827C,C3037T,G4105T,G4181T,C6402T,C7124T,C8986T,G9053T,C10029T,A11201G,A11332G,C11572T,C12624A,C14408T,G15451A,C16466T,A17236G,C19220T,T21087C,C21618G,T22917G,C22995A,A23403G,C23604G,C24208T,G24410A,C25469T,T26767C,T27291C,T27638C,C27752T,C27874T,A28461G,G28881T,G28916T,G29402T,G29742T	22029-22034,28248-28253,28271			M:I82T,N:D63G,N:R203M,N:G215C,N:D377Y,ORF1a:K1280N,ORF1a:A1306S,ORF1a:P2046L,ORF1a:P2287S,ORF1a:V2930L,ORF1a:T3255I,ORF1a:T3646A,ORF1a:P4120H,ORF1b:P314L,ORF1b:G662S,ORF1b:P1000L,ORF1b:I1257V,ORF1b:A1918V,ORF3a:S26L,ORF7a:V82A,ORF7a:T120I,ORF7b:T40I,ORF9b:T60A,S:T19R,S:R158G,S:L452R,S:T478K,S:D614G,S:P681R,S:D950N	ORF8:D119-,ORF8:F120-,S:E156-,S:F157-			T27291C|21J	T2827C,G4105T,C11572T,C12624A,T21087C	0	1	5	6	21717-21990	S:52-143		3000	0	good	274	10	0
hCoV-19/USA/WI-MHDL-2021110323/2021|EPI_ISL_6491517|2021-11-04	hCoV-19/USA/WI-MHDL-2021110323/2021	EPI_ISL_6491517	2021-11-04	21J	AY.103	B.1.617.2.103	21J	Delta	21J (Delta)	3.77038	good	39	13	0	0	569	0	30	4	0	191	89130	55	29836	0.976925	false	G210T,C241T,T2827C,C3037T,G4181T,C6402T,C7124T,C8986T,G9053T,C10029T,A11201G,A11332G,C11572T,C12624A,C14408T,G15451A,C16466T,A17236G,C18795T,C19220T,C21618G,T22917G,C22995A,A23403G,C23604G,C24208T,G24410A,C25469T,C25624T,T26767C,T27291C,T27638C,C27752T,C27874T,A28461G,G28881T,G28916T,G29402T,G29742T	22029-22034,28248-28253,28271			M:I82T,N:D63G,N:R203M,N:G215C,N:D377Y,ORF1a:A1306S,ORF1a:P2046L,ORF1a:P2287S,ORF1a:V2930L,ORF1a:T3255I,ORF1a:T3646A,ORF1a:P4120H,ORF1b:P314L,ORF1b:G662S,ORF1b:P1000L,ORF1b:I1257V,ORF1b:A1918V,ORF3a:S26L,ORF3a:H78Y,ORF7a:V82A,ORF7a:T120I,ORF7b:T40I,ORF9b:T60A,S:T19R,S:R158G,S:L452R,S:T478K,S:D614G,S:P681R,S:D950N	ORF8:D119-,ORF8:F120-,S:E156-,S:F157-			C25624T|21L,T27291C|21J	T2827C,C11572T,C12624A,C18795T	0	2	4	6	19276-19570,21717-21990	ORF1b:1937-2035,S:52-143		3000	9.96296	good	569	10	0
hCoV-19/USA/WI-MHDL-2021110324/2021|EPI_ISL_6491518|2021-11-04	hCoV-19/USA/WI-MHDL-2021110324/2021	EPI_ISL_6491518	2021-11-04	21J	AY.103	B.1.617.2.103	21J	Delta	21J (Delta)	0.694444	good	40	13	0	0	274	0	32	4	0	92	89126	55	29836	0.986791	false	G210T,C241T,C1205A,C3037T,A3722G,G4181T,C6402T,C7124T,C8986T,G9053T,C10029T,A11201G,A11332G,C11572T,C14408T,G15451A,C16466T,A17236G,G18960T,C19220T,G21608T,C21618G,T22917G,C22995A,A23403G,C23604G,C24208T,G24410A,C25469T,T26767C,T27291C,C27434T,T27638C,C27752T,C27874T,A28461G,G28881T,G28916T,G29402T,G29742T	22029-22034,28248-28253,28271			M:I82T,N:D63G,N:R203M,N:G215C,N:D377Y,ORF1a:Q314K,ORF1a:I1153V,ORF1a:A1306S,ORF1a:P2046L,ORF1a:P2287S,ORF1a:V2930L,ORF1a:T3255I,ORF1a:T3646A,ORF1b:P314L,ORF1b:G662S,ORF1b:P1000L,ORF1b:I1257V,ORF1b:A1918V,ORF3a:S26L,ORF7a:T14I,ORF7a:V82A,ORF7a:T120I,ORF7b:T40I,ORF9b:T60A,S:V16F,S:T19R,S:R158G,S:L452R,S:T478K,S:D614G,S:P681R,S:D950N	ORF8:D119-,ORF8:F120-,S:E156-,S:F157-			T27291C|21J	C1205A,A3722G,C11572T,G18960T,G21608T,C27434T	0	1	6	7	21717-21990	S:52-143		3000	0	good	274	10	0
hCoV-19/USA/WI-MHDL-2021110325/2021|EPI_ISL_6491519|2021-11-04	hCoV-19/USA/WI-MHDL-2021110325/2021	EPI_ISL_6491519	2021-11-04	21J	AY.44	B.1.617.2.44	21J	Delta	21J (Delta)	26.2971	good	36	13	0	0	1680	0	29	4	0	564	89142	55	29836	0.939772	false	G210T,C241T,C3037T,G4181T,C6040T,C6402T,C7124T,C8986T,G9053T,C10029T,A11201G,A11332G,C13517T,T14014G,C14408T,G15451A,G15907T,T16239C,C16466T,C19220T,C21618G,A23403G,C23604G,C25469T,G25785T,C26228T,T26767C,T27638C,C27752T,C27874T,G28028T,A28461G,G28881T,G28916T,G29402T,G29742T	22029-22034,28248-28253,28271			M:I82T,N:D63G,N:R203M,N:G215C,N:D377Y,ORF1a:A1306S,ORF1a:P2046L,ORF1a:P2287S,ORF1a:V2930L,ORF1a:T3255I,ORF1a:T3646A,ORF1b:T17I,ORF1b:F183V,ORF1b:P314L,ORF1b:G662S,ORF1b:G814C,ORF1b:P1000L,ORF1b:A1918V,ORF3a:S26L,ORF3a:W131C,ORF7a:V82A,ORF7a:T120I,ORF7b:T40I,ORF8:W45C,ORF9b:T60A,S:T19R,S:R158G,S:D614G,S:P681R	ORF8:D119-,ORF8:F120-,S:E156-,S:F157-			G25785T|20I	C13517T,G15907T,T16239C,C26228T,G28028T	0	1	5	6	7672-7968,19276-19570,21717-21990,22878-23144,24146-24416,29042-29316,29700	N:257-348,ORF1a:2469-2568,ORF1b:1937-2035,S:52-143,S:439-528,S:862-952		3000	51.1111	mediocre	1680	10	0
hCoV-19/USA/WI-MHDL-2021110326/2021|EPI_ISL_6491520|2021-11-04	hCoV-19/USA/WI-MHDL-2021110326/2021	EPI_ISL_6491520	2021-11-04	21J	AY.103	B.1.617.2.103	21J	Delta	21J (Delta)	4.34028	good	40	13	0	0	274	0	30	4	0	92	89126	55	29836	0.986791	false	G210T,C241T,T2827C,C3037T,G4105T,G4181T,C6402T,C7124T,C8140T,C8986T,G9053T,C10029T,A11201G,A11332G,C11572T,C12624A,C14408T,G15451A,C16466T,A17236G,C19220T,T21087C,C21618G,T22917G,C22995A,A23403G,C23604G,C24208T,G24410A,C25469T,T26767C,T27291C,T27638C,C27752T,C27874T,A28461G,G28881T,G28916T,G29402T,G29742T	22029-22034,28248-28253,28271			M:I82T,N:D63G,N:R203M,N:G215C,N:D377Y,ORF1a:K1280N,ORF1a:A1306S,ORF1a:P2046L,ORF1a:P2287S,ORF1a:V2930L,ORF1a:T3255I,ORF1a:T3646A,ORF1a:P4120H,ORF1b:P314L,ORF1b:G662S,ORF1b:P1000L,ORF1b:I1257V,ORF1b:A1918V,ORF3a:S26L,ORF7a:V82A,ORF7a:T120I,ORF7b:T40I,ORF9b:T60A,S:T19R,S:R158G,S:L452R,S:T478K,S:D614G,S:P681R,S:D950N	ORF8:D119-,ORF8:F120-,S:E156-,S:F157-			C8140T|22A,T27291C|21J	T2827C,G4105T,C11572T,C12624A,T21087C	0	2	5	7	21717-21990	S:52-143		3000	0	good	274	10	0
hCoV-19/USA/WI-MHDL-2021110327/2021|EPI_ISL_6491521|2021-11-04	hCoV-19/USA/WI-MHDL-2021110327/2021	EPI_ISL_6491521	2021-11-04	21J	AY.119	B.1.617.2.119	21J	Delta	21J (Delta)	0.992606	good	39	13	0	0	569	0	33	4	0	191	89130	55	29836	0.976925	false	G210T,C241T,C3037T,T3913C,G4181T,C6402T,C7124T,C8829T,C8986T,G9053T,C10029T,A11201G,A11332G,C12756T,C14408T,G15451A,C16466T,G19006T,C19220T,G19684T,C21618G,T22917G,C22995A,A23403G,C23604G,C23987T,G24410A,C25418A,C25469T,T26767C,T27638C,C27752T,C27874T,A28461G,C28807T,G28881T,G28916T,G29402T,G29742T	22029-22034,28248-28253,28271			M:I82T,N:D63G,N:R203M,N:G215C,N:D377Y,ORF1a:A1306S,ORF1a:P2046L,ORF1a:P2287S,ORF1a:A2855V,ORF1a:V2930L,ORF1a:T3255I,ORF1a:T3646A,ORF1a:T4164I,ORF1b:P314L,ORF1b:G662S,ORF1b:P1000L,ORF1b:A1847S,ORF1b:A1918V,ORF1b:V2073L,ORF3a:T9K,ORF3a:S26L,ORF7a:V82A,ORF7a:T120I,ORF7b:T40I,ORF9b:T60A,S:T19R,S:R158G,S:L452R,S:T478K,S:D614G,S:P681R,S:P809S,S:D950N	ORF8:D119-,ORF8:F120-,S:E156-,S:F157-				T3913C,C12756T,G19684T,C23987T,C25418A,C28807T	0	0	6	6	19276-19570,21717-21990	ORF1b:1937-2035,S:52-143		3000	9.96296	good	569	10	0
hCoV-19/USA/WI-MHDL-2021110328/2021|EPI_ISL_6491522|2021-11-04	hCoV-19/USA/WI-MHDL-2021110328/2021	EPI_ISL_6491522	2021-11-04	21J	AY.39	B.1.617.2.39	21J	Delta	21J (Delta)	0.173611	good	42	13	0	0	274	0	33	4	0	92	89118	55	29836	0.986791	false	G210T,C241T,C3037T,A3559C,G4181T,C6402T,C7124T,G7756T,C8986T,G9053T,C9979T,C10029T,A11201G,A11332G,T12037C,C12043T,C14408T,C14786T,G15451A,C15654T,C16466T,C19220T,G20397A,G21372T,C21618G,T22917G,C22995A,A23403G,C23604G,G24410A,C25469T,T26089C,T26767C,G27604A,T27638C,C27752T,C27874T,A28461G,G28881T,G28916T,G29402T,G29742T	22029-22034,28248-28253,28271			M:I82T,N:D63G,N:R203M,N:G215C,N:D377Y,ORF1a:K1098N,ORF1a:A1306S,ORF1a:P2046L,ORF1a:P2287S,ORF1a:K2497N,ORF1a:V2930L,ORF1a:T3255I,ORF1a:T3646A,ORF1b:P314L,ORF1b:A440V,ORF1b:G662S,ORF1b:P1000L,ORF1b:A1918V,ORF1b:Q2635H,ORF3a:S26L,ORF3a:Y233H,ORF7a:V71I,ORF7a:V82A,ORF7a:T120I,ORF7b:T40I,ORF9b:T60A,S:T19R,S:R158G,S:L452R,S:T478K,S:D614G,S:P681R,S:D950N	ORF8:D119-,ORF8:F120-,S:E156-,S:F157-				A3559C,G7756T,C9979T,T12037C,C12043T,C14786T,C15654T,G20397A,T26089C	0	0	9	9	21717-21990	S:52-143		3000	0	good	274	10	0
hCoV-19/USA/WI-MHDL-2021110329/2021|EPI_ISL_6491523|2021-11-04	hCoV-19/USA/WI-MHDL-2021110329/2021	EPI_ISL_6491523	2021-11-04	21J	AY.39	B.1.617.2.39	21J	Delta	21J (Delta)	8.61139	good	42	13	0	0	858	0	31	4	0	285	89118	55	29836	0.967261	false	G210T,C241T,C1929T,C3037T,G4181T,C6402T,C7124T,C8986T,G9053T,C9264T,C10029T,A11201G,A11332G,G13309A,C14408T,G15451A,C16466T,C17004T,C19220T,C21370T,G21372T,T22917G,C22995A,A23403G,C23604G,G24410A,C25469T,T25676C,C26022T,T26767C,G26828T,G27604A,T27638C,C27684T,C27752T,C27874T,A28461G,G28881T,G28916T,C29311T,G29402T,G29742T	22029-22034,28248-28253,28271			M:I82T,N:D63G,N:R203M,N:G215C,N:D377Y,ORF1a:A555V,ORF1a:A1306S,ORF1a:P2046L,ORF1a:P2287S,ORF1a:V2930L,ORF1a:T3000I,ORF1a:T3255I,ORF1a:T3646A,ORF1b:P314L,ORF1b:G662S,ORF1b:P1000L,ORF1b:A1918V,ORF1b:Q2635Y,ORF3a:S26L,ORF3a:L95S,ORF7a:V71I,ORF7a:V82A,ORF7a:T120I,ORF7b:T40I,ORF9b:T60A,S:R158G,S:L452R,S:T478K,S:D614G,S:P681R,S:D950N	ORF8:D119-,ORF8:F120-,S:E156-,S:F157-			C29311T|21G	C1929T,C9264T,G13309A,C17004T,C21370T,T25676C,C26022T,G26828T,C27684T	0	1	9	10	19276-19570,21428-21990	ORF1b:1937-2035,ORF1b:2654-2696,S:1-143		3000	20.6667	good	858	10	0
hCoV-19/USA/WI-MHDL-2021110330/2021|EPI_ISL_6491524|2021-11-04	hCoV-19/USA/WI-MHDL-2021110330/2021	EPI_ISL_6491524	2021-11-04	21J	AY.103	B.1.617.2.103	21J	Delta	21J (Delta)	0.173611	good	42	13	0	0	274	0	31	4	0	92	89118	55	29836	0.986791	false	G210T,C241T,C3037T,G4181T,C4633T,C6402T,C7124T,C8986T,G9053T,C10029T,A11201G,A11332G,C12025T,C14408T,G14584A,G14712T,G15451A,C16466T,A17236G,C19220T,C21304A,G21305A,C21618G,T22917G,C22995A,A23403G,C23604G,C24208T,G24410A,C25469T,T26767C,T27638C,C27752T,C27874T,G27933T,A28461G,T28723C,G28881T,G28916T,G29402T,G29690T,G29742T	22029-22034,28248-28253,28271			M:I82T,N:D63G,N:R203M,N:G215C,N:D377Y,ORF1a:A1306S,ORF1a:P2046L,ORF1a:P2287S,ORF1a:V2930L,ORF1a:T3255I,ORF1a:T3646A,ORF1b:P314L,ORF1b:A373T,ORF1b:G662S,ORF1b:P1000L,ORF1b:I1257V,ORF1b:A1918V,ORF1b:R2613N,ORF3a:S26L,ORF7a:V82A,ORF7a:T120I,ORF7b:T40I,ORF8:A14S,ORF9b:T60A,S:T19R,S:R158G,S:L452R,S:T478K,S:D614G,S:P681R,S:D950N	ORF8:D119-,ORF8:F120-,S:E156-,S:F157-				C4633T,C12025T,G14584A,G14712T,C21304A,G21305A,G27933T,T28723C,G29690T	0	0	9	9	21717-21990	S:52-143		3000	0	good	274	10	0
hCoV-19/USA/WI-MHDL-2021110331/2021|EPI_ISL_6491525|2021-11-04	hCoV-19/USA/WI-MHDL-2021110331/2021	EPI_ISL_6491525	2021-11-04	21J	AY.4	B.1.617.2.4	21J	Delta	21J (Delta)	0.173611	good	41	13	0	0	274	0	33	4	0	92	89122	55	29836	0.986791	false	G210T,C241T,C1077T,C2450T,C3037T,G4181T,C6317T,C6402T,C7124T,C7851T,T8830A,C8986T,G9053T,C9985T,C10029T,C10714T,A11201G,A11332G,G12164T,C13176T,C14408T,G15451A,C16466T,C19220T,C21618G,T22917G,C22995A,A23403G,C23604G,G24410A,C25469T,G25537T,T26767C,T27638C,C27752T,C27874T,A28461G,G28881T,G28916T,G29402T,G29742T	22029-22034,28248-28253,28271			M:I82T,N:D63G,N:R203M,N:G215C,N:D377Y,ORF1a:P271L,ORF1a:A1306S,ORF1a:P2018S,ORF1a:P2046L,ORF1a:P2287S,ORF1a:A2529V,ORF1a:V2930L,ORF1a:T3255I,ORF1a:T3646A,ORF1a:A3967S,ORF1a:T4304I,ORF1b:P314L,ORF1b:G662S,ORF1b:P1000L,ORF1b:A1918V,ORF3a:S26L,ORF3a:G49C,ORF7a:V82A,ORF7a:T120I,ORF7b:T40I,ORF9b:T60A,S:T19R,S:R158G,S:L452R,S:T478K,S:D614G,S:P681R,S:D950N	ORF8:D119-,ORF8:F120-,S:E156-,S:F157-				C1077T,C2450T,C6317T,T8830A,C9985T,C10714T,G12164T,C13176T,G25537T	0	0	9	9	21717-21990	S:52-143		3000	0	good	274	10	0
hCoV-19/USA/WI-MHDL-2021110332/2021|EPI_ISL_6571150|2021-11-04	hCoV-19/USA/WI-MHDL-2021110332/2021	EPI_ISL_6571150	2021-11-04	21J	AY.44	B.1.617.2.44	21J	Delta	21J (Delta)	38.4689	mediocre	44	7	0	0	869	0	32	2	0	291	89136	55	29836	0.966893	false	G210T,C241T,C3037T,G4181T,C6040T,C6402T,C6638T,C7124T,C7926T,C8986T,G9053T,C10029T,C10969T,A11201G,A11332G,T14014G,C14408T,G15451A,C16466T,C16726T,G18412A,C19220T,C20646T,C21618G,T22917G,C22995A,A23403G,C23604G,G24410A,C25469T,T26767C,T27638C,C27752T,C27874T,G28073T,G28460A,A28461G,G28881T,G28916T,C29119T,G29402T,G29593T,A29700G,G29742T	28248-28253,28271			M:I82T,N:D63S,N:R203M,N:G215C,N:D377Y,ORF1a:A1306S,ORF1a:P2046L,ORF1a:H2125Y,ORF1a:P2287S,ORF1a:A2554V,ORF1a:V2930L,ORF1a:T3255I,ORF1a:T3646A,ORF1b:F183V,ORF1b:P314L,ORF1b:G662S,ORF1b:P1000L,ORF1b:H1087Y,ORF1b:V1649I,ORF1b:A1918V,ORF3a:S26L,ORF7a:V82A,ORF7a:T120I,ORF7b:T40I,ORF8:L60F,ORF9b:T60A,S:T19R,S:L452R,S:T478K,S:D614G,S:P681R,S:D950N	ORF8:D119-,ORF8:F120-			C6638T|21J,C7926T|21J&21K,C16726T|21J,G28073T|21J	C10969T,G18412A,C20646T,G28460A,C29119T,G29593T	0	4	6	10	19276-19570,21717-22290	ORF1b:1937-2035,S:52-243		3000	21.0741	good	869	10	0
hCoV-19/USA/WI-MHDL-2021110333/2021|EPI_ISL_6571151|2021-11-04	hCoV-19/USA/WI-MHDL-2021110333/2021	EPI_ISL_6571151	2021-11-04	21J	AY.4	B.1.617.2.4	21J	Delta	21J (Delta)	0.992606	good	40	13	0	0	569	0	33	4	0	191	89126	55	29836	0.976925	false	G210T,C241T,C1077T,C2450T,C3037T,G4181T,C6317T,C6402T,C7124T,C7851T,T8830A,C8986T,G9053T,C9985T,C10029T,A11201G,A11332G,G12164T,C13176T,C14408T,G15451A,C16466T,C19220T,C21618G,T22917G,C22995A,A23403G,C23604G,G24410A,C25469T,G25537T,T26767C,T27638C,C27752T,C27874T,A28461G,G28881T,G28916T,G29402T,G29742T	22029-22034,28248-28253,28271			M:I82T,N:D63G,N:R203M,N:G215C,N:D377Y,ORF1a:P271L,ORF1a:A1306S,ORF1a:P2018S,ORF1a:P2046L,ORF1a:P2287S,ORF1a:A2529V,ORF1a:V2930L,ORF1a:T3255I,ORF1a:T3646A,ORF1a:A3967S,ORF1a:T4304I,ORF1b:P314L,ORF1b:G662S,ORF1b:P1000L,ORF1b:A1918V,ORF3a:S26L,ORF3a:G49C,ORF7a:V82A,ORF7a:T120I,ORF7b:T40I,ORF9b:T60A,S:T19R,S:R158G,S:L452R,S:T478K,S:D614G,S:P681R,S:D950N	ORF8:D119-,ORF8:F120-,S:E156-,S:F157-				C1077T,C2450T,C6317T,T8830A,C9985T,G12164T,C13176T,G25537T	0	0	8	8	19276-19570,21717-21990	ORF1b:1937-2035,S:52-143		3000	9.96296	good	569	10	0
hCoV-19/USA/WI-MHDL-2021110334/2021|EPI_ISL_6571152|2021-11-04	hCoV-19/USA/WI-MHDL-2021110334/2021	EPI_ISL_6571152	2021-11-04	21J	AY.103	B.1.617.2.103	21J	Delta	21J (Delta)	0.173611	good	42	13	0	0	274	0	31	4	0	92	89118	55	29836	0.986791	false	G210T,C241T,C3037T,G4181T,C4633T,C6402T,C7124T,C8986T,G9053T,C10029T,A11201G,A11332G,C12025T,C14408T,G14584A,G14712T,G15451A,C16466T,A17236G,C19220T,C21304A,G21305A,C21618G,T22917G,C22995A,A23403G,C23604G,C24208T,G24410A,C25469T,T26767C,T27638C,C27752T,C27874T,G27933T,A28461G,T28723C,G28881T,G28916T,G29402T,G29690T,G29742T	22029-22034,28248-28253,28271			M:I82T,N:D63G,N:R203M,N:G215C,N:D377Y,ORF1a:A1306S,ORF1a:P2046L,ORF1a:P2287S,ORF1a:V2930L,ORF1a:T3255I,ORF1a:T3646A,ORF1b:P314L,ORF1b:A373T,ORF1b:G662S,ORF1b:P1000L,ORF1b:I1257V,ORF1b:A1918V,ORF1b:R2613N,ORF3a:S26L,ORF7a:V82A,ORF7a:T120I,ORF7b:T40I,ORF8:A14S,ORF9b:T60A,S:T19R,S:R158G,S:L452R,S:T478K,S:D614G,S:P681R,S:D950N	ORF8:D119-,ORF8:F120-,S:E156-,S:F157-				C4633T,C12025T,G14584A,G14712T,C21304A,G21305A,G27933T,T28723C,G29690T	0	0	9	9	21717-21990	S:52-143		3000	0	good	274	10	0
hCoV-19/USA/WI-MHDL-2021110337/2021|EPI_ISL_6571155|2021-11-04	hCoV-19/USA/WI-MHDL-2021110337/2021	EPI_ISL_6571155	2021-11-04	21J	AY.103	B.1.617.2.103	21J	Delta	21J (Delta)	0.694444	good	40	13	0	0	38	0	31	4	0	13	89126	55	29836	0.994683	false	G210T,C241T,C3037T,G4181T,C6402T,A6907C,C7124T,C8986T,G9053T,C10029T,A11201G,A11332G,C14408T,G15451A,C16466T,A17236G,A18360G,C19220T,C21618G,T22917G,C22995A,A23403G,G23593T,C23604G,C24208T,G24410A,C25469T,C25702T,T26767C,T27638C,C27752T,C27874T,C28256T,A28461G,C28606T,G28881T,G28895T,G28916T,G29402T,G29742T	22029-22034,28248-28253,28271			M:I82T,N:D63G,N:R203M,N:A208S,N:G215C,N:D377Y,ORF1a:A1306S,ORF1a:P2046L,ORF1a:P2287S,ORF1a:V2930L,ORF1a:T3255I,ORF1a:T3646A,ORF1b:P314L,ORF1b:G662S,ORF1b:P1000L,ORF1b:I1257V,ORF1b:A1918V,ORF3a:S26L,ORF3a:P104S,ORF7a:V82A,ORF7a:T120I,ORF7b:T40I,ORF9b:T60A,S:T19R,S:R158G,S:L452R,S:T478K,S:D614G,S:Q677H,S:P681R,S:D950N	ORF8:D119-,ORF8:F120-,S:E156-,S:F157-			G23593T|20D	A6907C,A18360G,C25702T,C28256T,C28606T,G28895T	0	1	6	7	21953-21990	S:131-143		3000	0	good	38	10	0
hCoV-19/USA/WI-MHDL-2021110436/2021|EPI_ISL_6861948|2021-11-04	hCoV-19/USA/WI-MHDL-2021110436/2021	EPI_ISL_6861948	2021-11-04	21J	AY.100	B.1.617.2.100	21J	Delta	21J (Delta)	0	good	42	13	0	0	267	0	33	4	0	89	89220	39	29854	0.988162	false	G210T,C241T,A2556T,G2879A,C3037T,G4181T,C6402T,C7124T,T7348G,C8986T,G9053T,C9559T,C10029T,A11201G,A11332G,C14408T,C15240T,G15451A,C16466T,G17122T,G18948T,C19220T,C21618G,C21846T,G21987A,T22917G,C22995A,A23403G,C23604G,G24410A,C25469T,T26767C,T26861C,T27638C,C27752T,C27874T,T28007C,A28461G,G28881T,G28916T,G29402T,G29742T	22029-22034,28248-28253,28271			M:I82T,N:D63G,N:R203M,N:G215C,N:D377Y,ORF1a:Q764L,ORF1a:A872T,ORF1a:A1306S,ORF1a:P2046L,ORF1a:P2287S,ORF1a:N2361K,ORF1a:V2930L,ORF1a:T3255I,ORF1a:T3646A,ORF1b:P314L,ORF1b:G662S,ORF1b:P1000L,ORF1b:A1219S,ORF1b:A1918V,ORF3a:S26L,ORF7a:V82A,ORF7a:T120I,ORF7b:T40I,ORF9b:T60A,S:T19R,S:T95I,S:G142D,S:R158G,S:L452R,S:T478K,S:D614G,S:P681R,S:D950N	ORF8:D119-,ORF8:F120-,S:E156-,S:F157-				A2556T,G2879A,T7348G,G18948T,T26861C	0	0	5	5	19291-19557	ORF1b:1942-2030		3000	0	good	267	10	0
hCoV-19/USA/WI-MHDL-2021110437/2021|EPI_ISL_6861949|2021-11-04	hCoV-19/USA/WI-MHDL-2021110437/2021	EPI_ISL_6861949	2021-11-04	21I	AY.47	B.1.617.2.47	21I	Delta	21I (Delta)	0.210703	good	42	13	0	0	352	0	32	4	0	121	89211	39	29851	0.985219	false	G210T,C241T,C920T,C1684T,C3037T,C5144T,G5164T,C5184T,A5584G,C9891T,G10265T,T11418C,C11514T,C11776T,C12049T,C13019T,C13965T,C14408T,G15451A,A15604G,C16466T,A21405G,C21618G,G21987A,C22227T,G22427A,T22917G,C22995A,A23403G,C23604G,G24410A,C25469T,G26065A,T26767C,T27638C,C27752T,C28236T,G28326T,A28461G,G28881T,G29402T,G29742T	22029-22034,28248-28253,28271			M:I82T,N:G18V,N:D63G,N:R203M,N:D377Y,ORF1a:E1633D,ORF1a:P1640L,ORF1a:A3209V,ORF1a:G3334C,ORF1a:V3718A,ORF1a:T3750I,ORF1b:P314L,ORF1b:G662S,ORF1b:N713D,ORF1b:P1000L,ORF3a:S26L,ORF3a:V225I,ORF7a:V82A,ORF7a:T120I,ORF8:R115C,ORF9b:V15L,ORF9b:T60A,S:T19R,S:G142D,S:R158G,S:A222V,S:V289I,S:L452R,S:T478K,S:D614G,S:P681R,S:D950N	ORF8:D119-,ORF8:F120-,S:E156-,S:F157-				C920T,C5144T,G10265T,C11776T,C13965T,A15604G,A21405G,G26065A,C28236T	0	0	9	9	19309-19312,19330-19548,21164-21167,21170-21192,21234-21270,21284-21307,21322-21362	ORF1b:1948-1949,ORF1b:1955-2027,ORF1b:2566-2575,ORF1b:2589-2601,ORF1b:2606-2614,ORF1b:2619-2632		3000	1.92593	good	352	10	0
hCoV-19/USA/WI-MHDL-2021110438/2021|EPI_ISL_6861950|2021-11-04	hCoV-19/USA/WI-MHDL-2021110438/2021	EPI_ISL_6861950	2021-11-04	21J	AY.118	B.1.617.2.118	21J	Delta	21J (Delta)	11.1111	good	42	13	0	0	263	0	34	4	0	88	89217	39	29853	0.988262	false	G210T,C241T,T826C,G1820A,A2396G,G2782C,C3037T,G4181T,C4321T,C6402T,C7124T,C8986T,G9053T,C9391T,C10029T,A11201G,A11332G,C14408T,G15451A,C16466T,C19220T,C21618G,C21846T,G21987A,T22917G,C22995A,A23403G,C23604G,G24410A,G25352T,C25469T,T25903G,T26767C,A27338T,T27638C,C27752T,C27874T,A28461G,G28881T,G28916T,G29402T,G29742T	22029-22034,28248-28253,28271			M:I82T,N:D63G,N:R203M,N:G215C,N:D377Y,ORF1a:G519S,ORF1a:T711A,ORF1a:A1306S,ORF1a:P2046L,ORF1a:P2287S,ORF1a:V2930L,ORF1a:T3255I,ORF1a:T3646A,ORF1b:P314L,ORF1b:G662S,ORF1b:P1000L,ORF1b:A1918V,ORF3a:S26L,ORF3a:S171A,ORF6:E46V,ORF7a:V82A,ORF7a:T120I,ORF7b:T40I,ORF9b:T60A,S:T19R,S:T95I,S:G142D,S:R158G,S:L452R,S:T478K,S:D614G,S:P681R,S:D950N,S:V1264L	ORF8:D119-,ORF8:F120-,S:E156-,S:F157-			G1820A|21J,C4321T|21L&22B&22E&22C&23A&22A&22D&22F&rec&23B,G25352T|21I	A2396G,G2782C,C9391T,T25903G	0	3	4	7	19294-19556	ORF1b:1943-2030		3000	0	good	263	10	0
hCoV-19/USA/WI-MHDL-2021110469/2021|EPI_ISL_6861977|2021-11-04	hCoV-19/USA/WI-MHDL-2021110469/2021	EPI_ISL_6861977	2021-11-04	21J	B.1.617.2	B.1.617.2	21J	Delta	21J (Delta)	27.7862	good	35	7	0	0	1003	0	26	2	0	345	89106	39	29798	0.961676	false	G210T,C241T,C3037T,A3559C,G4181T,C5512T,C6402T,C7124T,G7756T,C8986T,G9053T,C9979T,C10029T,A11201G,A11332G,T12037C,C12043T,C14408T,G15451A,C15654T,C16466T,C19220T,T22917G,C22995A,A23403G,C23604G,G24410A,C25469T,T26767C,C27752T,C27874T,A28461G,G28881T,G28916T,G29402T	28248-28253,28271			M:I82T,N:D63G,N:R203M,N:G215C,N:D377Y,ORF1a:K1098N,ORF1a:A1306S,ORF1a:P2046L,ORF1a:P2287S,ORF1a:K2497N,ORF1a:V2930L,ORF1a:T3255I,ORF1a:T3646A,ORF1b:P314L,ORF1b:G662S,ORF1b:P1000L,ORF1b:A1918V,ORF3a:S26L,ORF7a:T120I,ORF7b:T40I,ORF9b:T60A,S:L452R,S:T478K,S:D614G,S:P681R,S:D950N	ORF8:D119-,ORF8:F120-		G21618C,T29742G		A3559C,C5512T,G7756T,C9979T,T12037C,C12043T,C15654T	2	0	7	9	19299-19315,19329-19398,19414-19551,21163-21190,21213-21220,21250-21260,21274-21371,21410-21422,21677-21715,21733-21809,21823-21995,22008-22016,22029-22171,22184-22186,22265-22271,22282-22288,27528-27659,27672-27683,27698-27708,29780-29786	ORF1b:1944-1950,ORF1b:1954-1977,ORF1b:1983-2028,ORF1b:2566-2575,ORF1b:2582-2585,ORF1b:2595-2598,ORF1b:2603-2635,ORF1b:2648-2652,ORF7a:45-89,ORF7a:93-97,ORF7a:102-105,S:39-51,S:57-83,S:87-145,S:149-152,S:156-203,S:208,S:235-237,S:240-242		3000	26.037	good	1003	10	0
hCoV-19/USA/WI-WSLH-221328/2021|EPI_ISL_6719771|2021-11-04	hCoV-19/USA/WI-WSLH-221328/2021	EPI_ISL_6719771	2021-11-04	21J	AY.103	B.1.617.2.103	21J	Delta	21J (Delta)	4.37516	good	35	13	0	0	818	0	27	4	0	277	89146	55	29836	0.968598	false	G210T,C241T,C3037T,G4181T,C6402T,C7124T,C7165T,C8986T,G9053T,C10029T,A11201G,A11332G,A12466G,C14408T,G15451A,C16466T,A17236G,C18486T,C19220T,C21618G,A23403G,C23604G,C24208T,G24410A,C25469T,T26767C,C27527T,T27638C,C27752T,C27874T,A28461G,G28881T,G28916T,G29402T,G29742T	22029-22034,28248-28253,28271			M:I82T,N:D63G,N:R203M,N:G215C,N:D377Y,ORF1a:A1306S,ORF1a:P2046L,ORF1a:P2287S,ORF1a:V2930L,ORF1a:T3255I,ORF1a:T3646A,ORF1b:P314L,ORF1b:G662S,ORF1b:P1000L,ORF1b:I1257V,ORF1b:A1918V,ORF3a:S26L,ORF7a:P45L,ORF7a:V82A,ORF7a:T120I,ORF7b:T40I,ORF9b:T60A,S:T19R,S:R158G,S:D614G,S:P681R,S:D950N	ORF8:D119-,ORF8:F120-,S:E156-,S:F157-			C7165T|21B,C27527T|21J	A12466G,C18486T	0	2	2	4	2194-2205,8636-8637,21717-22013,22303-22542,22878-23144	ORF1a:643-647,ORF1a:2791,S:52-151,S:247-327,S:439-528		3000	19.1852	good	818	10	0
hCoV-19/USA/WI-MHDL-2021110290/2021|EPI_ISL_6371356|2021-11-05	hCoV-19/USA/WI-MHDL-2021110290/2021	EPI_ISL_6371356	2021-11-05	21J	AY.39	B.1.617.2.39	21J	Delta	21J (Delta)	0.694444	good	40	13	0	0	267	0	33	4	0	90	89126	55	29836	0.987025	false	G210T,C241T,G1820A,C3037T,G3304T,G3433T,G3692T,T3862C,G4181T,C6402T,C7124T,C8986T,G9053T,C10029T,A11201G,A11332G,C14408T,G15451A,C16466T,A16644G,C19220T,G20274T,G21372T,C21618G,C21846T,G21987A,A23403G,C23604G,G24410A,C25469T,T26767C,G27604A,T27638C,C27752T,C27874T,A28461G,G28881T,G28916T,G29402T,G29742T	22029-22034,28248-28253,28271			M:I82T,N:D63G,N:R203M,N:G215C,N:D377Y,ORF1a:G519S,ORF1a:E1013D,ORF1a:V1143F,ORF1a:A1306S,ORF1a:P2046L,ORF1a:P2287S,ORF1a:V2930L,ORF1a:T3255I,ORF1a:T3646A,ORF1b:P314L,ORF1b:G662S,ORF1b:P1000L,ORF1b:A1918V,ORF1b:M2269I,ORF1b:Q2635H,ORF3a:S26L,ORF7a:V71I,ORF7a:V82A,ORF7a:T120I,ORF7b:T40I,ORF9b:T60A,S:T19R,S:T95I,S:G142D,S:R158G,S:D614G,S:P681R,S:D950N	ORF8:D119-,ORF8:F120-,S:E156-,S:F157-			G1820A|21J	G3304T,G3433T,G3692T,T3862C,A16644G,G20274T	0	1	6	7	22878-23144	S:439-528		3000	0	good	267	10	0
hCoV-19/USA/WI-MHDL-2021110291/2021|EPI_ISL_6371357|2021-11-05	hCoV-19/USA/WI-MHDL-2021110291/2021	EPI_ISL_6371357	2021-11-05	21J	AY.3	B.1.617.2.3	21J	Delta	21J (Delta)	6.50125	good	40	13	0	0	821	0	33	4	0	276	88613	55	29665	0.96278	false	G210T,C241T,G410T,T1623C,C3037T,G4181T,C6402T,C7124T,C8986T,G9053T,C10029T,A11201G,A11332G,A11456G,C12784T,C14318T,C14408T,G15438T,G15451A,C16466T,C18060T,C19220T,C19763T,C21618G,C22077A,T22917G,C22995A,A23403G,C23604G,G24410A,C25469T,G25855T,T26767C,T27638C,C27752T,C27874T,A28461G,G29050A,G29402T,C29509T	22029-22034,28248-28253,28271			M:I82T,N:D63G,N:D377Y,ORF1a:G49C,ORF1a:I453T,ORF1a:A1306S,ORF1a:P2046L,ORF1a:P2287S,ORF1a:V2930L,ORF1a:T3255I,ORF1a:T3646A,ORF1a:I3731V,ORF1b:T284I,ORF1b:P314L,ORF1b:M657I,ORF1b:G662S,ORF1b:P1000L,ORF1b:A1918V,ORF1b:T2099I,ORF3a:S26L,ORF3a:D155Y,ORF7a:V82A,ORF7a:T120I,ORF7b:T40I,ORF9b:T60A,S:T19R,S:R158G,S:S172Y,S:L452R,S:T478K,S:D614G,S:P681R,S:D950N	ORF8:D119-,ORF8:F120-,S:E156-,S:F157-			C18060T|19B	G410T,T1623C,C12784T,C14318T,G15438T,C19763T,C22077A,G25855T	0	1	8	9	19276-19570,19955,21717-21990,28757-29007	N:162-245,ORF1b:1937-2035,ORF1b:2163,S:52-143		3000	19.2963	good	821	10	0
hCoV-19/USA/WI-MHDL-2021110292/2021|EPI_ISL_6371358|2021-11-05	hCoV-19/USA/WI-MHDL-2021110292/2021	EPI_ISL_6371358	2021-11-05	21J	AY.3	B.1.617.2.3	21J	Delta	21J (Delta)	2.77778	good	43	13	0	0	0	0	36	4	0	0	88601	55	29665	0.990235	false	G210T,C241T,G410T,T1623C,C3037T,G4181T,C6402T,C7124T,C8986T,G9053T,C10029T,A11201G,A11332G,A11456G,C12784T,C14318T,C14408T,G15438T,G15451A,C16466T,C18060T,C19220T,C19763T,C21618G,G21987A,C22077A,T22917G,C22995A,A23403G,C23604G,G24410A,C25469T,G25855T,T26767C,T27638C,C27752T,C27874T,A28461G,G28881T,G28916T,G29050A,G29402T,C29509T	22029-22034,28248-28253,28271			M:I82T,N:D63G,N:R203M,N:G215C,N:D377Y,ORF1a:G49C,ORF1a:I453T,ORF1a:A1306S,ORF1a:P2046L,ORF1a:P2287S,ORF1a:V2930L,ORF1a:T3255I,ORF1a:T3646A,ORF1a:I3731V,ORF1b:T284I,ORF1b:P314L,ORF1b:M657I,ORF1b:G662S,ORF1b:P1000L,ORF1b:A1918V,ORF1b:T2099I,ORF3a:S26L,ORF3a:D155Y,ORF7a:V82A,ORF7a:T120I,ORF7b:T40I,ORF9b:T60A,S:T19R,S:G142D,S:R158G,S:S172Y,S:L452R,S:T478K,S:D614G,S:P681R,S:D950N	ORF8:D119-,ORF8:F120-,S:E156-,S:F157-			C18060T|19B	G410T,T1623C,C12784T,C14318T,G15438T,C19763T,C22077A,G25855T	0	1	8	9				3000	0	good	0	10	0
hCoV-19/USA/WI-MHDL-2021110439/2021|EPI_ISL_6861951|2021-11-05	hCoV-19/USA/WI-MHDL-2021110439/2021	EPI_ISL_6861951	2021-11-05	21J	AY.3	B.1.617.2.3	21J	Delta	21J (Delta)	1.5625	good	39	13	0	0	259	0	31	4	0	87	88962	39	29764	0.98542	false	G210T,C241T,C3037T,G4181T,C4686T,C6402T,C7124T,C8986T,G9053T,C10029T,A11201G,A11332G,A11456G,C14408T,G15451A,C16466T,C16954T,T16986C,C19220T,C21618G,G21987A,T22917G,C22995A,A23403G,C23604G,G24410A,A25223G,C25469T,T25686A,T26767C,T27638C,C27752T,C27874T,A28461G,G28881T,G28916T,G29050A,G29402T,C29509T	22029-22034,28248-28253,28271			M:I82T,N:D63G,N:R203M,N:G215C,N:D377Y,ORF1a:A1306S,ORF1a:T1474I,ORF1a:P2046L,ORF1a:P2287S,ORF1a:V2930L,ORF1a:T3255I,ORF1a:T3646A,ORF1a:I3731V,ORF1b:P314L,ORF1b:G662S,ORF1b:P1000L,ORF1b:A1918V,ORF3a:S26L,ORF7a:V82A,ORF7a:T120I,ORF7b:T40I,ORF9b:T60A,S:T19R,S:G142D,S:R158G,S:L452R,S:T478K,S:D614G,S:P681R,S:D950N,S:I1221V	ORF8:D119-,ORF8:F120-,S:E156-,S:F157-		T29742G		C4686T,C16954T,T16986C,A25223G,T25686A	1	0	5	6	19294-19552	ORF1b:1943-2029		3000	0	good	259	10	0
hCoV-19/USA/WI-MHDL-2021110440/2021|EPI_ISL_6861952|2021-11-05	hCoV-19/USA/WI-MHDL-2021110440/2021	EPI_ISL_6861952	2021-11-05	21J	AY.3	B.1.617.2.3	21J	Delta	21J (Delta)	0	good	40	13	0	0	260	0	32	4	0	87	88724	39	29686	0.982778	false	G210T,C241T,C3037T,G4181T,C4686T,C6402T,C7124T,C8986T,G9053T,C10029T,A11201G,A11332G,A11456G,C14408T,G15451A,C16466T,C16954T,T16986C,C19220T,C21618G,G21987A,T22917G,C22995A,A23403G,C23604G,G24410A,A25223G,C25469T,T25686A,T26767C,C27535T,T27638C,C27752T,C27874T,A28461G,G28881T,G28916T,G29050A,G29402T,C29509T	22029-22034,28248-28253,28271			M:I82T,N:D63G,N:R203M,N:G215C,N:D377Y,ORF1a:A1306S,ORF1a:T1474I,ORF1a:P2046L,ORF1a:P2287S,ORF1a:V2930L,ORF1a:T3255I,ORF1a:T3646A,ORF1a:I3731V,ORF1b:P314L,ORF1b:G662S,ORF1b:P1000L,ORF1b:A1918V,ORF3a:S26L,ORF7a:P48S,ORF7a:V82A,ORF7a:T120I,ORF7b:T40I,ORF9b:T60A,S:T19R,S:G142D,S:R158G,S:L452R,S:T478K,S:D614G,S:P681R,S:D950N,S:I1221V	ORF8:D119-,ORF8:F120-,S:E156-,S:F157-				C4686T,C16954T,T16986C,A25223G,T25686A,C27535T	0	0	6	6	19294-19553	ORF1b:1943-2029		3000	0	good	260	10	0
hCoV-19/USA/WI-MHDL-2021110441/2021|EPI_ISL_6861953|2021-11-05	hCoV-19/USA/WI-MHDL-2021110441/2021	EPI_ISL_6861953	2021-11-05	21J	AY.103	B.1.617.2.103	21J	Delta	21J (Delta)	29.3403	good	43	13	0	0	258	0	33	4	0	86	89219	39	29855	0.988496	false	G210T,C241T,C3037T,G4181T,C6402T,T6661C,C7124T,C8140T,C8986T,G9053T,C10029T,A11201G,A11332G,C11575T,C11750T,G12202T,C14120T,C14408T,G15451A,C16466T,A17236G,C19220T,C21618G,G21987A,T22917G,C22995A,A23403G,C23604G,C24208T,G24410A,C25469T,T26767C,T27291C,G27459A,T27638C,C27752T,C27874T,G27967A,A28461G,G28881T,G28916T,G29402T,G29742T	22029-22034,28248-28253,28271			M:I82T,N:D63G,N:R203M,N:G215C,N:D377Y,ORF1a:A1306S,ORF1a:P2046L,ORF1a:P2287S,ORF1a:V2930L,ORF1a:T3255I,ORF1a:T3646A,ORF1a:L3829F,ORF1a:K3979N,ORF1b:P218L,ORF1b:P314L,ORF1b:G662S,ORF1b:P1000L,ORF1b:I1257V,ORF1b:A1918V,ORF3a:S26L,ORF7a:V82A,ORF7a:T120I,ORF7b:T40I,ORF8:C25Y,ORF9b:T60A,S:T19R,S:G142D,S:R158G,S:L452R,S:T478K,S:D614G,S:P681R,S:D950N	ORF8:D119-,ORF8:F120-,S:E156-,S:F157-			C8140T|22A,C11750T|22E&22B&23B,C14120T|20I,T27291C|21J	T6661C,C11575T,G12202T,G27459A,G27967A	0	4	5	9	19294-19551	ORF1b:1943-2028		3000	0	good	258	10	0
hCoV-19/USA/WI-MHDL-2021110442/2021|EPI_ISL_6861954|2021-11-05	hCoV-19/USA/WI-MHDL-2021110442/2021	EPI_ISL_6861954	2021-11-05	21J	AY.103	B.1.617.2.103	21J	Delta	21J (Delta)	0.694444	good	41	13	0	0	263	0	33	4	0	88	89245	31	29853	0.98853	false	G210T,C241T,C3037T,G4181T,C6402T,T6778C,C7124T,C8986T,G9053T,C10029T,A11201G,A11332G,A12878G,C14408T,C14925T,G15451A,C16466T,A17236G,C17850T,C19220T,G19670A,C21008T,C21618G,G21987A,C22181T,T22917G,C22995A,A23403G,C23604G,C24208T,G24410A,C25469T,T26767C,T27638C,C27752T,C27874T,A28461G,G28881T,G28916T,G29402T,G29742T	22029-22034,28248-28253,28271			M:I82T,N:D63G,N:R203M,N:G215C,N:D377Y,ORF1a:A1306S,ORF1a:P2046L,ORF1a:P2287S,ORF1a:V2930L,ORF1a:T3255I,ORF1a:T3646A,ORF1a:I4205V,ORF1b:P314L,ORF1b:G662S,ORF1b:P1000L,ORF1b:I1257V,ORF1b:A1918V,ORF1b:G2068E,ORF1b:T2514I,ORF3a:S26L,ORF7a:V82A,ORF7a:T120I,ORF7b:T40I,ORF9b:T60A,S:T19R,S:G142D,S:R158G,S:H207Y,S:L452R,S:T478K,S:D614G,S:P681R,S:D950N	ORF8:D119-,ORF8:F120-,S:E156-,S:F157-			A12878G|21C	T6778C,C14925T,C17850T,G19670A,C21008T,C22181T	0	1	6	7	19294-19556	ORF1b:1943-2030		3000	0	good	263	10	0
hCoV-19/USA/WI-MHDL-2021110449/2021|EPI_ISL_6861959|2021-11-05	hCoV-19/USA/WI-MHDL-2021110449/2021	EPI_ISL_6861959	2021-11-05	21J	AY.3	B.1.617.2.3	21J	Delta	21J (Delta)	0	good	40	13	0	0	285	0	32	4	0	86	89060	39	29798	0.985687	false	G210T,C241T,C3037T,G4181T,C4686T,C6402T,C7124T,C8986T,G9053T,C10029T,A11201G,A11332G,A11456G,C14408T,G15451A,C16466T,C16954T,T16986C,C19220T,C21618G,G21987A,T22917G,C22995A,A23403G,C23604G,G24410A,A25223G,C25469T,T25686A,T26767C,C27535T,T27638C,C27752T,C27874T,A28461G,G28881T,G28916T,G29050A,G29402T,C29509T	22029-22034,28248-28253,28271			M:I82T,N:D63G,N:R203M,N:G215C,N:D377Y,ORF1a:A1306S,ORF1a:T1474I,ORF1a:P2046L,ORF1a:P2287S,ORF1a:V2930L,ORF1a:T3255I,ORF1a:T3646A,ORF1a:I3731V,ORF1b:P314L,ORF1b:G662S,ORF1b:P1000L,ORF1b:A1918V,ORF3a:S26L,ORF7a:P48S,ORF7a:V82A,ORF7a:T120I,ORF7b:T40I,ORF9b:T60A,S:T19R,S:G142D,S:R158G,S:L452R,S:T478K,S:D614G,S:P681R,S:D950N,S:I1221V	ORF8:D119-,ORF8:F120-,S:E156-,S:F157-				C4686T,C16954T,T16986C,A25223G,T25686A,C27535T	0	0	6	6	19298-19553,29687,29694-29715,29739-29744	ORF1b:1944-2029		3000	0	good	285	10	0
hCoV-19/USA/WI-MHDL-2021110452/2021|EPI_ISL_6861962|2021-11-05	hCoV-19/USA/WI-MHDL-2021110452/2021	EPI_ISL_6861962	2021-11-05	21J	AY.118	B.1.617.2.118	21J	Delta	21J (Delta)	1.09379	good	43	13	0	0	559	0	31	4	0	185	89216	39	29854	0.978397	false	G210T,C241T,G789A,T826C,C3037T,G4181T,C6402T,C7124T,C8836T,C8986T,G9053T,C10029T,T10837C,A11201G,A11332G,T14103C,A14157G,C14408T,G15451A,C16466T,A17121T,C19220T,C21618G,C21846T,G21987A,T22042C,T22917G,C22995A,A23403G,C23604G,T23728C,G24410A,C25469T,C26527T,T26767C,A27338T,C27752T,C27874T,A28461G,G28881T,G28916T,G29402T,G29742T	22029-22034,28248-28253,28271			M:A2V,M:I82T,N:D63G,N:R203M,N:G215C,N:D377Y,ORF1a:R175H,ORF1a:A1306S,ORF1a:P2046L,ORF1a:P2287S,ORF1a:V2930L,ORF1a:T3255I,ORF1a:T3646A,ORF1b:P314L,ORF1b:G662S,ORF1b:P1000L,ORF1b:A1918V,ORF3a:S26L,ORF6:E46V,ORF7a:T120I,ORF7b:T40I,ORF9b:T60A,S:T19R,S:T95I,S:G142D,S:R158G,S:L452R,S:T478K,S:D614G,S:P681R,S:D950N	ORF8:D119-,ORF8:F120-,S:E156-,S:F157-				G789A,C8836T,T10837C,T14103C,A14157G,A17121T,T22042C,T23728C,C26527T	0	0	9	9	19294-19554,27388-27685	ORF1b:1943-2029,ORF7a:1-98		3000	9.59259	good	559	10	0
hCoV-19/USA/WI-MHDL-2021110470/2021|EPI_ISL_6861978|2021-11-05	hCoV-19/USA/WI-MHDL-2021110470/2021	EPI_ISL_6861978	2021-11-05	21J	AY.103	B.1.617.2.103	21J	Delta	21J (Delta)	2.77778	good	40	13	0	0	251	0	31	4	0	84	89261	31	29857	0.989065	false	G210T,C241T,T2827C,C3037T,G4181T,C6402T,C7124T,C8986T,G9053T,C10029T,A11201G,A11332G,C11572T,C12624A,C14408T,G15451A,C16466T,A17236G,C18795T,C19220T,C21618G,G21987A,T22917G,C22995A,A23403G,C23604G,C24208T,G24410A,C25469T,C25624T,T26767C,T27291C,T27638C,C27752T,C27874T,A28461G,G28881T,G28916T,G29402T,G29742T	22029-22034,28248-28253,28271			M:I82T,N:D63G,N:R203M,N:G215C,N:D377Y,ORF1a:A1306S,ORF1a:P2046L,ORF1a:P2287S,ORF1a:V2930L,ORF1a:T3255I,ORF1a:T3646A,ORF1a:P4120H,ORF1b:P314L,ORF1b:G662S,ORF1b:P1000L,ORF1b:I1257V,ORF1b:A1918V,ORF3a:S26L,ORF3a:H78Y,ORF7a:V82A,ORF7a:T120I,ORF7b:T40I,ORF9b:T60A,S:T19R,S:G142D,S:R158G,S:L452R,S:T478K,S:D614G,S:P681R,S:D950N	ORF8:D119-,ORF8:F120-,S:E156-,S:F157-			C25624T|21L,T27291C|21J	T2827C,C11572T,C12624A,C18795T	0	2	4	6	19298-19548	ORF1b:1944-2027		3000	0	good	251	10	0
hCoV-19/USA/WI-MHDL-2021110338/2021|EPI_ISL_6571156|2021-11-06	hCoV-19/USA/WI-MHDL-2021110338/2021	EPI_ISL_6571156	2021-11-06	21J	AY.119	B.1.617.2.119	21J	Delta	21J (Delta)	0	good	38	13	0	0	275	0	32	4	0	93	89134	55	29836	0.986757	false	G210T,C241T,C3037T,G4181T,C5284T,C6402T,C7124T,C8829T,C8986T,G9053T,C10029T,A11201G,A11332G,C12756T,C14408T,G15451A,C16466T,G19006T,C19220T,C21618G,T22917G,C22995A,A23403G,C23604G,C23987T,G24410A,C25418A,C25469T,T26767C,T27638C,C27752T,C27874T,A28461G,C28807T,G28881T,G28916T,G29402T,G29742T	22029-22034,28248-28253,28271			M:I82T,N:D63G,N:R203M,N:G215C,N:D377Y,ORF1a:A1306S,ORF1a:P2046L,ORF1a:P2287S,ORF1a:A2855V,ORF1a:V2930L,ORF1a:T3255I,ORF1a:T3646A,ORF1a:T4164I,ORF1b:P314L,ORF1b:G662S,ORF1b:P1000L,ORF1b:A1847S,ORF1b:A1918V,ORF3a:T9K,ORF3a:S26L,ORF7a:V82A,ORF7a:T120I,ORF7b:T40I,ORF9b:T60A,S:T19R,S:R158G,S:L452R,S:T478K,S:D614G,S:P681R,S:P809S,S:D950N	ORF8:D119-,ORF8:F120-,S:E156-,S:F157-			C5284T|22B	C12756T,C23987T,C25418A,C28807T	0	1	4	5	3913,21717-21990	ORF1a:1216,S:52-143		3000	0	good	275	10	0
hCoV-19/USA/WI-MHDL-2021110486/2021|EPI_ISL_7368690|2021-11-06	hCoV-19/USA/WI-MHDL-2021110486/2021	EPI_ISL_7368690	2021-11-06	21J	AY.103	B.1.617.2.103	21J	Delta	21J (Delta)	5.33288	good	40	13	0	0	569	0	30	4	0	191	89126	55	29836	0.976925	false	G210T,C241T,T2827C,C3037T,G4181T,C6402T,C7124T,C8986T,G9053T,C10029T,A11201G,A11332G,C11572T,C12624A,C13643T,C14408T,G15451A,C16466T,A17236G,C18795T,C19220T,C21618G,T22917G,C22995A,A23403G,C23604G,C24208T,G24410A,C25469T,C26681T,T26767C,T27291C,T27638C,C27752T,C27874T,A28461G,G28881T,G28916T,G29402T,G29742T	22029-22034,28248-28253,28271			M:I82T,N:D63G,N:R203M,N:G215C,N:D377Y,ORF1a:A1306S,ORF1a:P2046L,ORF1a:P2287S,ORF1a:V2930L,ORF1a:T3255I,ORF1a:T3646A,ORF1a:P4120H,ORF1b:S59F,ORF1b:P314L,ORF1b:G662S,ORF1b:P1000L,ORF1b:I1257V,ORF1b:A1918V,ORF3a:S26L,ORF7a:V82A,ORF7a:T120I,ORF7b:T40I,ORF9b:T60A,S:T19R,S:R158G,S:L452R,S:T478K,S:D614G,S:P681R,S:D950N	ORF8:D119-,ORF8:F120-,S:E156-,S:F157-			C26681T|21C&21B&19B,T27291C|21J	T2827C,C11572T,C12624A,C13643T,C18795T	0	2	5	7	19276-19570,21717-21990	ORF1b:1937-2035,S:52-143		3000	9.96296	good	569	10	0
hCoV-19/USA/WI-MHDL-2021110487/2021|EPI_ISL_7368691|2021-11-06	hCoV-19/USA/WI-MHDL-2021110487/2021	EPI_ISL_7368691	2021-11-06	21J	AY.103	B.1.617.2.103	21J	Delta	21J (Delta)	2.63028	good	38	13	0	0	579	0	29	4	0	195	89134	55	29836	0.976591	false	G210T,C241T,C3037T,G4181T,C6402T,C7124T,C8986T,G9053T,C10029T,A11201G,A11332G,C11572T,C12624A,C14408T,G15451A,C16466T,A17236G,C18795T,C19220T,C21618G,T22917G,C22995A,A23403G,C23604G,C24208T,G24410A,C25469T,C26681T,T26767C,T27291C,T27638C,C27752T,C27874T,A28461G,G28881T,G28916T,G29402T,G29742T	22029-22034,28248-28253,28271			M:I82T,N:D63G,N:R203M,N:G215C,N:D377Y,ORF1a:A1306S,ORF1a:P2046L,ORF1a:P2287S,ORF1a:V2930L,ORF1a:T3255I,ORF1a:T3646A,ORF1a:P4120H,ORF1b:P314L,ORF1b:G662S,ORF1b:P1000L,ORF1b:I1257V,ORF1b:A1918V,ORF3a:S26L,ORF7a:V82A,ORF7a:T120I,ORF7b:T40I,ORF9b:T60A,S:T19R,S:R158G,S:L452R,S:T478K,S:D614G,S:P681R,S:D950N	ORF8:D119-,ORF8:F120-,S:E156-,S:F157-			C26681T|21C&21B&19B,T27291C|21J	C11572T,C12624A,C18795T	0	2	3	5	2827,13364-13372,19276-19570,21717-21990	ORF1a:854,ORF1a:4367-4369,ORF1b:1937-2035,S:52-143		3000	10.3333	good	579	10	0
hCoV-19/USA/WI-MHDL-2021110491/2021|EPI_ISL_7368692|2021-11-06	hCoV-19/USA/WI-MHDL-2021110491/2021	EPI_ISL_7368692	2021-11-06	21J	AY.103	B.1.617.2.103	21J	Delta	21J (Delta)	3.77778	good	39	13	0	0	570	0	29	4	0	192	89130	55	29836	0.976892	false	G210T,C241T,T2827C,C3037T,G4181T,C6402T,C7124T,C8986T,G9053T,C10029T,A11201G,A11332G,C11572T,C12624A,C14408T,G15451A,C16466T,A17236G,C18795T,C19220T,C21618G,T22917G,C22995A,A23403G,C23604G,C24208T,G24410A,C25469T,C26681T,T26767C,T27291C,T27638C,C27752T,C27874T,A28461G,G28881T,G28916T,G29402T,G29742T	22029-22034,28248-28253,28271			M:I82T,N:D63G,N:R203M,N:G215C,N:D377Y,ORF1a:A1306S,ORF1a:P2046L,ORF1a:P2287S,ORF1a:V2930L,ORF1a:T3255I,ORF1a:T3646A,ORF1a:P4120H,ORF1b:P314L,ORF1b:G662S,ORF1b:P1000L,ORF1b:I1257V,ORF1b:A1918V,ORF3a:S26L,ORF7a:V82A,ORF7a:T120I,ORF7b:T40I,ORF9b:T60A,S:T19R,S:R158G,S:L452R,S:T478K,S:D614G,S:P681R,S:D950N	ORF8:D119-,ORF8:F120-,S:E156-,S:F157-			C26681T|21C&21B&19B,T27291C|21J	T2827C,C11572T,C12624A,C18795T	0	2	4	6	19276-19570,21717-21990,22251	ORF1b:1937-2035,S:52-143,S:230		3000	10	good	570	10	0
hCoV-19/USA/WI-MHDL-2021110492/2021|EPI_ISL_7368693|2021-11-06	hCoV-19/USA/WI-MHDL-2021110492/2021	EPI_ISL_7368693	2021-11-06	21J	AY.103	B.1.617.2.103	21J	Delta	21J (Delta)	2.5625	good	38	13	0	0	570	0	29	4	0	192	89134	55	29836	0.976892	false	G210T,C241T,C3037T,G4181T,C6402T,C7124T,C8986T,G9053T,C10029T,A11201G,A11332G,C11572T,C12624A,C14408T,G15451A,C16466T,A17236G,C18795T,C19220T,C21618G,T22917G,C22995A,A23403G,C23604G,C24208T,G24410A,C25469T,C26681T,T26767C,T27291C,T27638C,C27752T,C27874T,A28461G,G28881T,G28916T,G29402T,G29742T	22029-22034,28248-28253,28271			M:I82T,N:D63G,N:R203M,N:G215C,N:D377Y,ORF1a:A1306S,ORF1a:P2046L,ORF1a:P2287S,ORF1a:V2930L,ORF1a:T3255I,ORF1a:T3646A,ORF1a:P4120H,ORF1b:P314L,ORF1b:G662S,ORF1b:P1000L,ORF1b:I1257V,ORF1b:A1918V,ORF3a:S26L,ORF7a:V82A,ORF7a:T120I,ORF7b:T40I,ORF9b:T60A,S:T19R,S:R158G,S:L452R,S:T478K,S:D614G,S:P681R,S:D950N	ORF8:D119-,ORF8:F120-,S:E156-,S:F157-			C26681T|21C&21B&19B,T27291C|21J	C11572T,C12624A,C18795T	0	2	3	5	2827,19276-19570,21717-21990	ORF1a:854,ORF1b:1937-2035,S:52-143		3000	10	good	570	10	0
hCoV-19/USA/WI-MHDL-2021110493/2021|EPI_ISL_7368694|2021-11-06	hCoV-19/USA/WI-MHDL-2021110493/2021	EPI_ISL_7368694	2021-11-06	21J	AY.39	B.1.617.2.39	21J	Delta	21J (Delta)	11.2942	good	41	13	0	0	1012	0	30	4	0	337	89122	55	29836	0.962111	false	G210T,C241T,C1929T,C3037T,G4181T,C6402T,C7124T,C8986T,G9053T,C9264T,C10029T,A11201G,A11332G,G13309A,C14408T,G15451A,C16466T,C17004T,C19220T,C21370T,G21372T,T22917G,C22995A,A23403G,C23604G,G24410A,C25469T,T25676C,C26022T,T26767C,G26828T,G27604A,T27638C,C27684T,C27752T,C27874T,A28461G,G28881T,G28916T,C29311T,G29742T	22029-22034,28248-28253,28271			M:I82T,N:D63G,N:R203M,N:G215C,ORF1a:A555V,ORF1a:A1306S,ORF1a:P2046L,ORF1a:P2287S,ORF1a:V2930L,ORF1a:T3000I,ORF1a:T3255I,ORF1a:T3646A,ORF1b:P314L,ORF1b:G662S,ORF1b:P1000L,ORF1b:A1918V,ORF1b:Q2635Y,ORF3a:S26L,ORF3a:L95S,ORF7a:V71I,ORF7a:V82A,ORF7a:T120I,ORF7b:T40I,ORF9b:T60A,S:R158G,S:L452R,S:T478K,S:D614G,S:P681R,S:D950N	ORF8:D119-,ORF8:F120-,S:E156-,S:F157-			C29311T|21G	C1929T,C9264T,G13309A,C17004T,C21370T,T25676C,C26022T,G26828T,C27684T	0	1	9	10	19276-19570,21428-21990,29357-29510	N:362-413,ORF1b:1937-2035,ORF1b:2654-2696,S:1-143		3000	26.3704	good	1012	10	0
hCoV-19/USA/WI-MHDL-2021110494/2021|EPI_ISL_7368695|2021-11-06	hCoV-19/USA/WI-MHDL-2021110494/2021	EPI_ISL_7368695	2021-11-06	21J	AY.39	B.1.617.2.39	21J	Delta	21J (Delta)	21.0556	good	42	13	0	0	1014	0	31	4	0	339	89118	55	29836	0.962044	false	G210T,C241T,C1929T,C3037T,G4181T,C6402T,C7124T,C8986T,G9053T,C9264T,C10029T,A11201G,A11332G,G13309A,C14408T,G15451A,C16466T,C17004T,C19220T,C21370T,G21372T,T22917G,C22995A,A23403G,C23604G,G24410A,C25469T,T25676C,C26022T,T26767C,G26828T,G27604A,T27638C,C27684T,C27752T,C27874T,C28093T,A28461G,G28881T,G28916T,C29311T,G29742T	22029-22034,28248-28253,28271			M:I82T,N:D63G,N:R203M,N:G215C,ORF1a:A555V,ORF1a:A1306S,ORF1a:P2046L,ORF1a:P2287S,ORF1a:V2930L,ORF1a:T3000I,ORF1a:T3255I,ORF1a:T3646A,ORF1b:P314L,ORF1b:G662S,ORF1b:P1000L,ORF1b:A1918V,ORF1b:Q2635Y,ORF3a:S26L,ORF3a:L95S,ORF7a:V71I,ORF7a:V82A,ORF7a:T120I,ORF7b:T40I,ORF8:S67F,ORF9b:T60A,S:R158G,S:L452R,S:T478K,S:D614G,S:P681R,S:D950N	ORF8:D119-,ORF8:F120-,S:E156-,S:F157-			C28093T|21H,C29311T|21G	C1929T,C9264T,G13309A,C17004T,C21370T,T25676C,C26022T,G26828T,C27684T	0	2	9	11	19276-19570,21408-21409,21428-21990,29357-29510	N:362-413,ORF1b:1937-2035,ORF1b:2647-2648,ORF1b:2654-2696,S:1-143		3000	26.4444	good	1014	10	0
hCoV-19/USA/WI-MHDL-2021110495/2021|EPI_ISL_7368696|2021-11-06	hCoV-19/USA/WI-MHDL-2021110495/2021	EPI_ISL_7368696	2021-11-06	21J	AY.3	B.1.617.2.3	21J	Delta	21J (Delta)	11.1673	good	40	13	0	0	364	0	32	4	0	124	88613	55	29665	0.978062	false	G210T,C241T,C3037T,G4181T,C5100T,C6402T,C6706T,C7124T,C7296T,C8986T,G9053T,C10029T,A11201G,A11332G,A11456G,C14408T,G15451A,C16466T,C17373T,C19220T,C21575T,C21618G,T22917G,C22995A,A23403G,C23604G,C23664T,G24410A,A24694G,C25469T,T26767C,T27638C,C27752T,C27874T,A28461G,G28881T,G28916T,G29050A,G29402T,C29509T	22029-22034,28248-28253,28271			M:I82T,N:D63G,N:R203M,N:G215C,N:D377Y,ORF1a:A1306S,ORF1a:S1612L,ORF1a:P2046L,ORF1a:P2287S,ORF1a:A2344V,ORF1a:V2930L,ORF1a:T3255I,ORF1a:T3646A,ORF1a:I3731V,ORF1b:P314L,ORF1b:G662S,ORF1b:P1000L,ORF1b:A1918V,ORF3a:S26L,ORF7a:V82A,ORF7a:T120I,ORF7b:T40I,ORF9b:T60A,S:L5F,S:T19R,S:R158G,S:L452R,S:T478K,S:D614G,S:P681R,S:A701V,S:D950N	ORF8:D119-,ORF8:F120-,S:E156-,S:F157-			C5100T|20H,C21575T|21J&21F,C23664T|21K&20H&21F	C6706T,C7296T,C17373T,A24694G	0	3	4	7	2317,19483-19570,21717-21990,29000	N:243,ORF1a:684,ORF1b:2006-2035,S:52-143		3000	2.37037	good	364	10	0
hCoV-19/USA/WI-MHDL-2021110497/2021|EPI_ISL_7368697|2021-11-06	hCoV-19/USA/WI-MHDL-2021110497/2021	EPI_ISL_7368697	2021-11-06	21J	AY.113	B.1.617.2.113	21J	Delta	21J (Delta)	3.7852	good	47	13	0	0	571	0	35	4	0	193	89098	55	29836	0.976859	false	G210T,C241T,G2185T,C3037T,G4181T,C6402T,C7124T,A7444G,C8986T,G9053T,C9165T,C10029T,A10323G,A11201G,A11332G,A12772G,C13115T,C14230T,C14408T,C15240T,G15451A,C16466T,C17676T,C19220T,A19865G,A19892G,T21291C,C21618G,T22917G,C22995A,A23403G,C23604G,G24410A,C25469T,C25578T,T26767C,C27427T,T27638C,C27752T,C27874T,G27990T,A28461G,G28881T,G28916T,T29068C,G29402T,G29742T	22029-22034,28248-28253,28271			M:I82T,N:D63G,N:R203M,N:G215C,N:D377Y,ORF1a:E640D,ORF1a:A1306S,ORF1a:P2046L,ORF1a:P2287S,ORF1a:V2930L,ORF1a:T2967I,ORF1a:T3255I,ORF1a:K3353R,ORF1a:T3646A,ORF1b:P255S,ORF1b:P314L,ORF1b:G662S,ORF1b:P1000L,ORF1b:A1918V,ORF1b:N2133S,ORF1b:D2142G,ORF3a:S26L,ORF7a:L12F,ORF7a:V82A,ORF7a:T120I,ORF7b:T40I,ORF8:V33F,ORF9b:T60A,S:T19R,S:R158G,S:L452R,S:T478K,S:D614G,S:P681R,S:D950N	ORF8:D119-,ORF8:F120-,S:E156-,S:F157-				G2185T,A7444G,C13115T,C14230T,C17676T,A19865G,A19892G,T21291C,C25578T,C27427T,G27990T,T29068C	0	0	12	12	9535,19276-19570,21717-21990,24320	ORF1a:3090,ORF1b:1937-2035,S:52-143,S:920		3000	10.037	good	571	10	0
hCoV-19/USA/WI-MHDL-2021110498/2021|EPI_ISL_7368698|2021-11-06	hCoV-19/USA/WI-MHDL-2021110498/2021	EPI_ISL_7368698	2021-11-06	21J	AY.120.1	B.1.617.2.120.1	21J	Delta	21J (Delta)	16.0296	good	36	40	0	0	1381	0	26	13	0	464	89054	55	29836	0.949771	false	G210T,C241T,C3037T,G4181T,C6402T,C6408T,C7124T,G7936T,C8986T,G9053T,C10029T,C11095T,A11201G,A11332G,C14408T,G15451A,G16377T,C16466T,C18252T,C19220T,C21618G,A23403G,C23604G,G24410A,A25003G,C25469T,T26767C,T27638C,C27752T,C27874T,A28461G,G28881T,G28916T,G29402T,C29675T,G29742T	22029-22034,27553-27579,28248-28253,28271			M:I82T,N:D63G,N:R203M,N:G215C,N:D377Y,ORF1a:A1306S,ORF1a:P2046L,ORF1a:S2048F,ORF1a:P2287S,ORF1a:V2930L,ORF1a:T3255I,ORF1a:T3646A,ORF1b:P314L,ORF1b:G662S,ORF1b:P1000L,ORF1b:A1918V,ORF3a:S26L,ORF7a:V82A,ORF7a:T120I,ORF7b:T40I,ORF9b:T60A,S:T19R,S:R158G,S:D614G,S:P681R,S:D950N	ORF7a:F54-,ORF7a:A55-,ORF7a:L56-,ORF7a:T57-,ORF7a:C58-,ORF7a:F59-,ORF7a:S60-,ORF7a:T61-,ORF7a:Q62-,ORF8:D119-,ORF8:F120-,S:E156-,S:F157-				G7936T,G16377T,C18252T,C29675T	0	0	4	4	2569-2850,13364-13625,19276-19570,21717-21990,22878-23144,26522	ORF1a:768-862,ORF1a:4367-4401,ORF1b:1-53,ORF1b:1937-2035,S:52-143,S:439-528		3000	40.037	mediocre	1381	10	0
hCoV-19/USA/WI-MHDL-2021110499/2021|EPI_ISL_7368699|2021-11-06	hCoV-19/USA/WI-MHDL-2021110499/2021	EPI_ISL_7368699	2021-11-06	21J	AY.103	B.1.617.2.103	21J	Delta	21J (Delta)	37.1648	mediocre	37	13	0	0	1946	0	29	4	0	656	89138	55	29836	0.930877	false	G210T,C241T,C3037T,G4181T,C6402T,C8986T,G9053T,C10029T,A11201G,A11332G,C11572T,C12624A,C14408T,G15451A,C15763T,C16466T,A17236G,C19220T,C21618G,A22107T,T22917G,C22995A,A23403G,C23604G,C24208T,G24410A,C25469T,C25521T,T26767C,T27638C,C27752T,C27874T,A28461G,G28881T,G28916T,G29402T,G29742T	22029-22034,28248-28253,28271			M:I82T,N:D63G,N:R203M,N:G215C,N:D377Y,ORF1a:A1306S,ORF1a:P2046L,ORF1a:V2930L,ORF1a:T3255I,ORF1a:T3646A,ORF1a:P4120H,ORF1b:P314L,ORF1b:G662S,ORF1b:P1000L,ORF1b:I1257V,ORF1b:A1918V,ORF3a:S26L,ORF7a:V82A,ORF7a:T120I,ORF7b:T40I,ORF9b:T60A,S:T19R,S:R158G,S:K182I,S:L452R,S:T478K,S:D614G,S:P681R,S:D950N	ORF8:D119-,ORF8:F120-,S:E156-,S:F157-				C11572T,C12624A,C15763T,A22107T,C25521T	0	0	5	5	2569-2850,7093-7332,8636-8913,10738-11022,13364-13625,19276-19570,20133,21717-21990,25647-25673,27291,29555	ORF1a:768-862,ORF1a:2276-2356,ORF1a:2791-2883,ORF1a:3491-3586,ORF1a:4367-4401,ORF1b:1-53,ORF1b:1937-2035,ORF1b:2222,ORF3a:85-94,ORF6:30,S:52-143		3000	60.963	mediocre	1946	10	0
hCoV-19/USA/WI-MHDL-2021110500/2021|EPI_ISL_7368700|2021-11-06	hCoV-19/USA/WI-MHDL-2021110500/2021	EPI_ISL_7368700	2021-11-06	21J	AY.117	B.1.617.2.117	21J	Delta	21J (Delta)	4.42943	good	44	13	0	0	857	0	35	4	0	288	89110	55	29836	0.967294	false	G210T,C241T,A1808C,G2202T,C3037T,A3722G,G4181T,C6402T,C7124T,C8986T,G9053T,C10029T,A11201G,A11332G,G14186T,C14408T,G15451A,G15768A,C15810T,C16466T,C16877T,G17790T,C19220T,C21618G,T22917G,C22995A,C23373T,A23403G,A23416T,C23604G,G24199T,G24410A,C25469T,T26767C,A27123G,T27638C,C27752T,C27874T,A28461G,C28708T,G28881T,G28916T,G29402T,G29742T	22029-22034,28248-28253,28271			M:I82T,M:I201V,N:D63G,N:R203M,N:G215C,N:D377Y,ORF1a:K515Q,ORF1a:W646L,ORF1a:I1153V,ORF1a:A1306S,ORF1a:P2046L,ORF1a:P2287S,ORF1a:V2930L,ORF1a:T3255I,ORF1a:T3646A,ORF1b:R240M,ORF1b:P314L,ORF1b:G662S,ORF1b:P1000L,ORF1b:T1137I,ORF1b:Q1441H,ORF1b:A1918V,ORF3a:S26L,ORF7a:V82A,ORF7a:T120I,ORF7b:T40I,ORF9b:T60A,S:T19R,S:R158G,S:L452R,S:T478K,S:T604I,S:D614G,S:P681R,S:D950N	ORF8:D119-,ORF8:F120-,S:E156-,S:F157-				A1808C,A3722G,G15768A,C16877T,G17790T,C23373T,A23416T,G24199T,A27123G	0	0	9	9	2243-2529,19276-19570,21717-21990,25793	ORF1a:660-755,ORF1b:1937-2035,ORF3a:134,S:52-143		3000	20.6296	good	857	10	0
hCoV-19/USA/WI-MHDL-2021110503/2021|EPI_ISL_7368701|2021-11-06	hCoV-19/USA/WI-MHDL-2021110503/2021	EPI_ISL_7368701	2021-11-06	21J	AY.103	B.1.617.2.103	21J	Delta	21J (Delta)	4.26257	good	42	13	0	0	629	0	31	4	0	212	89118	55	29836	0.974919	false	G210T,C241T,G1335C,G1738T,C3037T,A3780G,G4181T,G4255A,A5450C,C6402T,C7124T,C8986T,G9053T,G9086A,C10029T,A11201G,A11332G,C14408T,A15210G,G15451A,C16466T,A17236G,C19220T,T21408C,C21618G,T22917G,C22995A,A23403G,C23604G,C24208T,G24410A,C25469T,T26767C,T27291C,T27638C,C27752T,C27874T,A28461G,G28881T,G28916T,G29402T,G29742T	22029-22034,28248-28253,28271			M:I82T,N:D63G,N:R203M,N:G215C,N:D377Y,ORF1a:C357S,ORF1a:N1172S,ORF1a:A1306S,ORF1a:P2046L,ORF1a:P2287S,ORF1a:V2930L,ORF1a:G2941S,ORF1a:T3255I,ORF1a:T3646A,ORF1b:P314L,ORF1b:G662S,ORF1b:P1000L,ORF1b:I1257V,ORF1b:A1918V,ORF3a:S26L,ORF7a:V82A,ORF7a:T120I,ORF7b:T40I,ORF9b:T60A,S:T19R,S:R158G,S:L452R,S:T478K,S:D614G,S:P681R,S:D950N	ORF8:D119-,ORF8:F120-,S:E156-,S:F157-			T27291C|21J	G1335C,G1738T,A3780G,G4255A,A5450C,G9086A,A15210G,T21408C	0	1	8	9	4018-4077,19276-19570,21717-21990	ORF1a:1251-1271,ORF1b:1937-2035,S:52-143		3000	12.1852	good	629	10	0
hCoV-19/USA/WI-MHDL-2021110504/2021|EPI_ISL_7368702|2021-11-06	hCoV-19/USA/WI-MHDL-2021110504/2021	EPI_ISL_7368702	2021-11-06	21J	AY.113	B.1.617.2.113	21J	Delta	21J (Delta)	3.7852	good	47	13	0	0	571	0	35	4	0	193	89098	55	29836	0.976859	false	G210T,C241T,G2185T,C3037T,G4181T,C6402T,C7124T,A7444G,C8986T,G9053T,C9165T,C10029T,A10323G,A11201G,A11332G,A12772G,C13115T,C14230T,C14408T,C15240T,G15451A,C16466T,C17676T,C19220T,A19865G,A19892G,T21291C,C21618G,T22917G,C22995A,A23403G,C23604G,G24410A,C25469T,C25578T,T26767C,C27427T,T27638C,C27752T,C27874T,G27990T,A28461G,G28881T,G28916T,T29068C,G29402T,G29742T	22029-22034,28248-28253,28271			M:I82T,N:D63G,N:R203M,N:G215C,N:D377Y,ORF1a:E640D,ORF1a:A1306S,ORF1a:P2046L,ORF1a:P2287S,ORF1a:V2930L,ORF1a:T2967I,ORF1a:T3255I,ORF1a:K3353R,ORF1a:T3646A,ORF1b:P255S,ORF1b:P314L,ORF1b:G662S,ORF1b:P1000L,ORF1b:A1918V,ORF1b:N2133S,ORF1b:D2142G,ORF3a:S26L,ORF7a:L12F,ORF7a:V82A,ORF7a:T120I,ORF7b:T40I,ORF8:V33F,ORF9b:T60A,S:T19R,S:R158G,S:L452R,S:T478K,S:D614G,S:P681R,S:D950N	ORF8:D119-,ORF8:F120-,S:E156-,S:F157-				G2185T,A7444G,C13115T,C14230T,C17676T,A19865G,A19892G,T21291C,C25578T,C27427T,G27990T,T29068C	0	0	12	12	9535,19276-19570,21717-21990,24320	ORF1a:3090,ORF1b:1937-2035,S:52-143,S:920		3000	10.037	good	571	10	0
hCoV-19/USA/WI-MHDL-2021110505/2021|EPI_ISL_7368703|2021-11-06	hCoV-19/USA/WI-MHDL-2021110505/2021	EPI_ISL_7368703	2021-11-06	21J	AY.44	B.1.617.2.44	21J	Delta	21J (Delta)	8.50694	good	41	53	0	1	274	0	30	18	0	147	88987	55	29836	0.986791	false	G210T,C217T,C241T,C2706T,C3037T,G4181T,C6040T,C6402T,C7124T,C7926T,C8692T,C8986T,G9053T,C10029T,A11201G,A11332G,C13423T,T14014G,C14408T,A14912C,G15451A,C16466T,C19220T,T20631C,C21618G,T22917G,C22995A,A23403G,C23604G,G24410A,C25469T,T26767C,T27638C,C27752T,C27874T,A28461G,G28881T,G28916T,G29402T,A29700G,G29742T	22029-22034,26159-26161,27556-27592,28248-28253,28271		ORF7a:68-122	M:I82T,N:D63G,N:R203M,N:G215C,N:D377Y,ORF1a:T814I,ORF1a:A1306S,ORF1a:P2046L,ORF1a:P2287S,ORF1a:A2554V,ORF1a:V2930L,ORF1a:T3255I,ORF1a:T3646A,ORF1b:F183V,ORF1b:P314L,ORF1b:N482T,ORF1b:G662S,ORF1b:P1000L,ORF1b:A1918V,ORF3a:S26L,ORF3a:N257D,ORF7b:T40I,ORF9b:T60A,S:T19R,S:R158G,S:L452R,S:T478K,S:D614G,S:P681R,S:D950N	ORF3a:V255-,ORF7a:A55-,ORF7a:L56-,ORF7a:T57-,ORF7a:C58-,ORF7a:F59-,ORF7a:S60-,ORF7a:T61-,ORF7a:Q62-,ORF7a:F63-,ORF7a:A64-,ORF7a:F65-,ORF7a:A66-,ORF7a:C67-,ORF8:D119-,ORF8:F120-,S:E156-,S:F157-			C7926T|21J&21K,C8692T|rec	C217T,C2706T,C13423T,A14912C,T20631C	0	2	5	7	21717-21990	ORF7a:68-122,S:52-143		3000	0	good	274	10	0
hCoV-19/USA/WI-MHDL-2021110506/2021|EPI_ISL_7368704|2021-11-06	hCoV-19/USA/WI-MHDL-2021110506/2021	EPI_ISL_7368704	2021-11-06	21J	AY.44	B.1.617.2.44	21J	Delta	21J (Delta)	8.50694	good	41	53	0	1	274	0	30	18	0	147	88987	55	29836	0.986791	false	G210T,C217T,C241T,C2706T,C3037T,G4181T,C6040T,C6402T,C7124T,C7926T,C8692T,C8986T,G9053T,C10029T,A11201G,A11332G,C13423T,T14014G,C14408T,A14912C,G15451A,C16466T,C19220T,T20631C,C21618G,T22917G,C22995A,A23403G,C23604G,G24410A,C25469T,T26767C,T27638C,C27752T,C27874T,A28461G,G28881T,G28916T,G29402T,A29700G,G29742T	22029-22034,26159-26161,27556-27592,28248-28253,28271		ORF7a:68-122	M:I82T,N:D63G,N:R203M,N:G215C,N:D377Y,ORF1a:T814I,ORF1a:A1306S,ORF1a:P2046L,ORF1a:P2287S,ORF1a:A2554V,ORF1a:V2930L,ORF1a:T3255I,ORF1a:T3646A,ORF1b:F183V,ORF1b:P314L,ORF1b:N482T,ORF1b:G662S,ORF1b:P1000L,ORF1b:A1918V,ORF3a:S26L,ORF3a:N257D,ORF7b:T40I,ORF9b:T60A,S:T19R,S:R158G,S:L452R,S:T478K,S:D614G,S:P681R,S:D950N	ORF3a:V255-,ORF7a:A55-,ORF7a:L56-,ORF7a:T57-,ORF7a:C58-,ORF7a:F59-,ORF7a:S60-,ORF7a:T61-,ORF7a:Q62-,ORF7a:F63-,ORF7a:A64-,ORF7a:F65-,ORF7a:A66-,ORF7a:C67-,ORF8:D119-,ORF8:F120-,S:E156-,S:F157-			C7926T|21J&21K,C8692T|rec	C217T,C2706T,C13423T,A14912C,T20631C	0	2	5	7	21717-21990	ORF7a:68-122,S:52-143		3000	0	good	274	10	0
hCoV-19/USA/WI-MHDL-2021110507/2021|EPI_ISL_7368705|2021-11-06	hCoV-19/USA/WI-MHDL-2021110507/2021	EPI_ISL_7368705	2021-11-06	21J	AY.113	B.1.617.2.113	21J	Delta	21J (Delta)	2.77778	good	47	13	0	0	275	0	35	4	0	93	89098	55	29836	0.986757	false	G210T,C241T,G2185T,C3037T,G4181T,C6402T,C7124T,A7444G,C8986T,G9053T,C9165T,C10029T,A10323G,A11201G,A11332G,A12772G,C13115T,C14230T,C14408T,C15240T,G15451A,C16466T,C17676T,C19220T,A19865G,A19892G,T21291C,C21618G,T22917G,C22995A,A23403G,C23604G,G24410A,C25469T,C25578T,T26767C,C27427T,T27638C,C27752T,C27874T,G27990T,A28461G,G28881T,G28916T,T29068C,G29402T,G29742T	22029-22034,28248-28253,28271			M:I82T,N:D63G,N:R203M,N:G215C,N:D377Y,ORF1a:E640D,ORF1a:A1306S,ORF1a:P2046L,ORF1a:P2287S,ORF1a:V2930L,ORF1a:T2967I,ORF1a:T3255I,ORF1a:K3353R,ORF1a:T3646A,ORF1b:P255S,ORF1b:P314L,ORF1b:G662S,ORF1b:P1000L,ORF1b:A1918V,ORF1b:N2133S,ORF1b:D2142G,ORF3a:S26L,ORF7a:L12F,ORF7a:V82A,ORF7a:T120I,ORF7b:T40I,ORF8:V33F,ORF9b:T60A,S:T19R,S:R158G,S:L452R,S:T478K,S:D614G,S:P681R,S:D950N	ORF8:D119-,ORF8:F120-,S:E156-,S:F157-				G2185T,A7444G,C13115T,C14230T,C17676T,A19865G,A19892G,T21291C,C25578T,C27427T,G27990T,T29068C	0	0	12	12	9535,21717-21990	ORF1a:3090,S:52-143		3000	0	good	275	10	0
hCoV-19/USA/WI-MHDL-2021110508/2021|EPI_ISL_7368706|2021-11-06	hCoV-19/USA/WI-MHDL-2021110508/2021	EPI_ISL_7368706	2021-11-06	21J	AY.113	B.1.617.2.113	21J	Delta	21J (Delta)	2.77778	good	47	13	0	0	275	0	35	4	0	93	89098	55	29836	0.986757	false	G210T,C241T,G2185T,C3037T,G4181T,C6402T,C7124T,A7444G,C8986T,G9053T,C9165T,C10029T,A10323G,A11201G,A11332G,A12772G,C13115T,C14230T,C14408T,C15240T,G15451A,C16466T,C17676T,C19220T,A19865G,A19892G,T21291C,C21618G,T22917G,C22995A,A23403G,C23604G,G24410A,C25469T,C25578T,T26767C,C27427T,T27638C,C27752T,C27874T,G27990T,A28461G,G28881T,G28916T,T29068C,G29402T,G29742T	22029-22034,28248-28253,28271			M:I82T,N:D63G,N:R203M,N:G215C,N:D377Y,ORF1a:E640D,ORF1a:A1306S,ORF1a:P2046L,ORF1a:P2287S,ORF1a:V2930L,ORF1a:T2967I,ORF1a:T3255I,ORF1a:K3353R,ORF1a:T3646A,ORF1b:P255S,ORF1b:P314L,ORF1b:G662S,ORF1b:P1000L,ORF1b:A1918V,ORF1b:N2133S,ORF1b:D2142G,ORF3a:S26L,ORF7a:L12F,ORF7a:V82A,ORF7a:T120I,ORF7b:T40I,ORF8:V33F,ORF9b:T60A,S:T19R,S:R158G,S:L452R,S:T478K,S:D614G,S:P681R,S:D950N	ORF8:D119-,ORF8:F120-,S:E156-,S:F157-				G2185T,A7444G,C13115T,C14230T,C17676T,A19865G,A19892G,T21291C,C25578T,C27427T,G27990T,T29068C	0	0	12	12	9535,21717-21990	ORF1a:3090,S:52-143		3000	0	good	275	10	0
hCoV-19/USA/WI-MHDL-2021110443/2021|EPI_ISL_6864924|2021-11-07	hCoV-19/USA/WI-MHDL-2021110443/2021	EPI_ISL_6864924	2021-11-07	21J	AY.25	B.1.617.2.25	21J	Delta	21J (Delta)	8.50694	good	39	56	0	1	44	0	31	19	0	68	89105	39	29857	0.995719	false	G210T,C241T,C3037T,G3085C,G4181T,C6402T,C7124T,C8986T,G9053T,C10029T,C10377T,C10977T,A11201G,A11332G,G12801A,C14408T,G15451A,C16466T,C19220T,C21618G,G21987A,G22801T,T22917G,C22995A,A23403G,C23604G,G24410A,C25469T,G26107C,T26767C,A27507C,T27638C,C27752T,C27874T,A28461G,G28881T,G28916T,G29402T,G29742T	22029-22034,27556-27598,28248-28253,28271		ORF7a:70-122	M:I82T,N:D63G,N:R203M,N:G215C,N:D377Y,ORF1a:E940D,ORF1a:A1306S,ORF1a:P2046L,ORF1a:P2287S,ORF1a:V2930L,ORF1a:T3255I,ORF1a:P3371L,ORF1a:A3571V,ORF1a:T3646A,ORF1a:R4179K,ORF1b:P314L,ORF1b:G662S,ORF1b:P1000L,ORF1b:A1918V,ORF3a:S26L,ORF3a:E239Q,ORF7b:T40I,ORF9b:T60A,S:T19R,S:G142D,S:R158G,S:L452R,S:T478K,S:D614G,S:P681R,S:D950N	ORF7a:A55-,ORF7a:L56-,ORF7a:T57-,ORF7a:C58-,ORF7a:F59-,ORF7a:S60-,ORF7a:T61-,ORF7a:Q62-,ORF7a:F63-,ORF7a:A64-,ORF7a:F65-,ORF7a:A66-,ORF7a:C67-,ORF7a:P68-,ORF7a:D69-,ORF8:D119-,ORF8:F120-,S:E156-,S:F157-			C10977T|21J,G12801A|21J,G22801T|21J	G3085C,C10377T	0	3	2	5	19508-19551	ORF1b:2014-2028,ORF7a:70-122		3000	0	good	44	10	0
hCoV-19/USA/WI-MHDL-2021110444/2021|EPI_ISL_6864925|2021-11-07	hCoV-19/USA/WI-MHDL-2021110444/2021	EPI_ISL_6864925	2021-11-07	21J	AY.25	B.1.617.2.25	21J	Delta	21J (Delta)	8.50694	good	39	56	0	1	264	0	31	19	0	141	89117	31	29853	0.988496	false	G210T,C241T,C3037T,G3085C,G4181T,C6402T,C7124T,C8986T,G9053T,C10029T,C10377T,C10977T,A11201G,A11332G,G12801A,C14408T,G15451A,C16466T,C19220T,C21618G,G21987A,G22801T,T22917G,C22995A,A23403G,C23604G,G24410A,C25469T,G26107C,T26767C,A27507C,T27638C,C27752T,C27874T,A28461G,G28881T,G28916T,G29402T,G29742T	22029-22034,27556-27598,28248-28253,28271		ORF7a:70-122	M:I82T,N:D63G,N:R203M,N:G215C,N:D377Y,ORF1a:E940D,ORF1a:A1306S,ORF1a:P2046L,ORF1a:P2287S,ORF1a:V2930L,ORF1a:T3255I,ORF1a:P3371L,ORF1a:A3571V,ORF1a:T3646A,ORF1a:R4179K,ORF1b:P314L,ORF1b:G662S,ORF1b:P1000L,ORF1b:A1918V,ORF3a:S26L,ORF3a:E239Q,ORF7b:T40I,ORF9b:T60A,S:T19R,S:G142D,S:R158G,S:L452R,S:T478K,S:D614G,S:P681R,S:D950N	ORF7a:A55-,ORF7a:L56-,ORF7a:T57-,ORF7a:C58-,ORF7a:F59-,ORF7a:S60-,ORF7a:T61-,ORF7a:Q62-,ORF7a:F63-,ORF7a:A64-,ORF7a:F65-,ORF7a:A66-,ORF7a:C67-,ORF7a:P68-,ORF7a:D69-,ORF8:D119-,ORF8:F120-,S:E156-,S:F157-			C10977T|21J,G12801A|21J,G22801T|21J	G3085C,C10377T	0	3	2	5	19294-19557	ORF1b:1943-2030,ORF7a:70-122		3000	0	good	264	10	0
hCoV-19/USA/WI-WSLH-221598/2021|EPI_ISL_7263700|2021-11-07	hCoV-19/USA/WI-WSLH-221598/2021	EPI_ISL_7263700	2021-11-07	21J	AY.103	B.1.617.2.103	21J	Delta	21J (Delta)	2.92361	good	41	13	0	0	615	0	30	4	0	208	89122	55	29836	0.975387	false	G210T,C241T,A296G,C1853T,C3037T,G3338T,C4069A,G4181T,C6402T,A6529G,C7124T,C8986T,G9053T,C10029T,A11201G,A11332G,C11572T,C14408T,G15451A,C16466T,A17236G,C19220T,C21618G,T22917G,C22995A,A23403G,C23604G,C24208T,G24410A,C25469T,T26767C,T27291C,T27638C,C27752T,C27874T,A28461G,G28881T,G28916T,G29402T,G29449T,G29742T	22029-22034,28248-28253,28271			M:I82T,N:D63G,N:R203M,N:G215C,N:D377Y,ORF1a:K11E,ORF1a:V1025L,ORF1a:A1306S,ORF1a:P2046L,ORF1a:P2287S,ORF1a:V2930L,ORF1a:T3255I,ORF1a:T3646A,ORF1b:P314L,ORF1b:G662S,ORF1b:P1000L,ORF1b:I1257V,ORF1b:A1918V,ORF3a:S26L,ORF7a:V82A,ORF7a:T120I,ORF7b:T40I,ORF9b:T60A,S:T19R,S:R158G,S:L452R,S:T478K,S:D614G,S:P681R,S:D950N	ORF8:D119-,ORF8:F120-,S:E156-,S:F157-			T27291C|21J	A296G,C1853T,G3338T,C4069A,A6529G,C11572T,G29449T	0	1	7	8	11883-11889,21717-22006,22289-22290,22297-22542,23075-23144	ORF1a:3873-3875,S:52-148,S:243,S:245-327,S:505-528		3000	11.6667	good	615	10	0
hCoV-19/USA/WI-WSLH-221603/2021|EPI_ISL_7263705|2021-11-07	hCoV-19/USA/WI-WSLH-221603/2021	EPI_ISL_7263705	2021-11-07	21J	AY.43	B.1.617.2.43	21J	Delta	21J (Delta)	1.20012	good	35	13	0	0	492	0	31	4	0	165	89146	55	29836	0.9795	false	G210T,C241T,C3037T,G4181T,C6402T,C7124T,C8986T,G9053T,C10029T,A11201G,A11332G,C14408T,G15451A,C15952A,C16466T,C18744T,C19220T,C21618G,T22917G,C22995A,A23403G,C23604G,G24410A,C25469T,T26767C,T27638C,C27752T,C27874T,A28299T,A28461G,C28869T,G28881T,G28916T,G29402T,G29742T	22029-22034,28248-28253,28271			M:I82T,N:Q9L,N:D63G,N:P199L,N:R203M,N:G215C,N:D377Y,ORF1a:A1306S,ORF1a:P2046L,ORF1a:P2287S,ORF1a:V2930L,ORF1a:T3255I,ORF1a:T3646A,ORF1b:P314L,ORF1b:G662S,ORF1b:L829I,ORF1b:P1000L,ORF1b:A1918V,ORF3a:S26L,ORF7a:V82A,ORF7a:T120I,ORF7b:T40I,ORF9b:S6C,ORF9b:T60A,S:T19R,S:R158G,S:L452R,S:T478K,S:D614G,S:P681R,S:D950N	ORF8:D119-,ORF8:F120-,S:E156-,S:F157-		T24130C	C28869T|20G&21F		1	1	0	2	21717-21990,22325-22542	S:52-143,S:255-327		3000	7.11111	good	492	10	0
hCoV-19/USA/WI-MHDL-2021110388/2021|EPI_ISL_6945722|2021-11-08	hCoV-19/USA/WI-MHDL-2021110388/2021	EPI_ISL_6945722	2021-11-08	21J	AY.44	B.1.617.2.44	21J	Delta	21J (Delta)	76.5625	mediocre	45	13	0	0	275	0	37	4	0	93	89106	55	29836	0.986757	false	G210T,C241T,C2675T,C3037T,C3737T,G3971T,G4181T,C4246T,C6040T,C6402T,C6638T,C7124T,C7926T,C8986T,G9053T,C10029T,A11201G,A11332G,C13019T,T14014G,C14408T,G15451A,C16466T,C16726T,C19220T,C21618G,T22917G,C22995A,A23403G,C23604G,G24410A,C25469T,C26078T,C26111A,T26767C,T27638C,C27752T,C27874T,G28073T,A28461G,G28881T,G28916T,G29402T,A29700G,G29742T	22029-22034,28248-28253,28271			M:I82T,N:D63G,N:R203M,N:G215C,N:D377Y,ORF1a:P804S,ORF1a:P1158S,ORF1a:V1236F,ORF1a:A1306S,ORF1a:P2046L,ORF1a:H2125Y,ORF1a:P2287S,ORF1a:A2554V,ORF1a:V2930L,ORF1a:T3255I,ORF1a:T3646A,ORF1b:F183V,ORF1b:P314L,ORF1b:G662S,ORF1b:P1000L,ORF1b:H1087Y,ORF1b:A1918V,ORF3a:S26L,ORF3a:T229I,ORF3a:P240H,ORF7a:V82A,ORF7a:T120I,ORF7b:T40I,ORF8:L60F,ORF9b:T60A,S:T19R,S:R158G,S:L452R,S:T478K,S:D614G,S:P681R,S:D950N	ORF8:D119-,ORF8:F120-,S:E156-,S:F157-			C6638T|21J,C7926T|21J&21K,C13019T|21I,C16726T|21J,C26078T|22D,G28073T|21J	C2675T,C3737T,G3971T,C4246T,C26111A	0	6	5	11	12466,21717-21990	ORF1a:4067,S:52-143		3000	0	good	275	10	0
hCoV-19/USA/WI-MHDL-2021110445/2021|EPI_ISL_6861955|2021-11-08	hCoV-19/USA/WI-MHDL-2021110445/2021	EPI_ISL_6861955	2021-11-08	21J	AY.3	B.1.617.2.3	21J	Delta	21J (Delta)	2.77778	good	40	13	0	0	263	0	32	4	0	88	89003	39	29779	0.985787	false	G210T,C241T,C3037T,G4181T,C4686T,C6402T,C7124T,C8986T,G9053T,C10029T,A11201G,A11332G,A11456G,C14408T,G15451A,C16466T,C16954T,T16986C,C19220T,C21618G,G21987A,T22917G,C22995A,A23403G,C23604G,G24410A,A25223G,C25469T,T25686A,T26767C,C27535T,T27638C,C27752T,C27874T,A28461G,G28881T,G28916T,G29050A,G29402T,C29509T	22029-22034,28248-28253,28271			M:I82T,N:D63G,N:R203M,N:G215C,N:D377Y,ORF1a:A1306S,ORF1a:T1474I,ORF1a:P2046L,ORF1a:P2287S,ORF1a:V2930L,ORF1a:T3255I,ORF1a:T3646A,ORF1a:I3731V,ORF1b:P314L,ORF1b:G662S,ORF1b:P1000L,ORF1b:A1918V,ORF3a:S26L,ORF7a:P48S,ORF7a:V82A,ORF7a:T120I,ORF7b:T40I,ORF9b:T60A,S:T19R,S:G142D,S:R158G,S:L452R,S:T478K,S:D614G,S:P681R,S:D950N,S:I1221V	ORF8:D119-,ORF8:F120-,S:E156-,S:F157-		T29742G		C4686T,C16954T,T16986C,A25223G,T25686A,C27535T	1	0	6	7	19294-19556	ORF1b:1943-2030		3000	0	good	263	10	0
hCoV-19/USA/WI-MHDL-2021110446/2021|EPI_ISL_6861956|2021-11-08	hCoV-19/USA/WI-MHDL-2021110446/2021	EPI_ISL_6861956	2021-11-08	21J	AY.3	B.1.617.2.3	21J	Delta	21J (Delta)	0	good	41	13	0	0	265	0	32	4	0	89	89170	39	29836	0.987627	false	G210T,C241T,C3037T,G4181T,C4686T,C6402T,C7124T,C8986T,G9053T,C10029T,A11201G,A11332G,A11456G,C14408T,G15451A,C16466T,C16954T,T16986C,C19220T,C21618G,G21987A,T22917G,C22995A,A23403G,C23604G,G24410A,A25223G,C25469T,T25686A,T26767C,C27535T,T27638C,C27752T,C27874T,A28461G,G28881T,G28916T,G29050A,G29402T,C29509T,G29742T	22029-22034,28248-28253,28271			M:I82T,N:D63G,N:R203M,N:G215C,N:D377Y,ORF1a:A1306S,ORF1a:T1474I,ORF1a:P2046L,ORF1a:P2287S,ORF1a:V2930L,ORF1a:T3255I,ORF1a:T3646A,ORF1a:I3731V,ORF1b:P314L,ORF1b:G662S,ORF1b:P1000L,ORF1b:A1918V,ORF3a:S26L,ORF7a:P48S,ORF7a:V82A,ORF7a:T120I,ORF7b:T40I,ORF9b:T60A,S:T19R,S:G142D,S:R158G,S:L452R,S:T478K,S:D614G,S:P681R,S:D950N,S:I1221V	ORF8:D119-,ORF8:F120-,S:E156-,S:F157-				C4686T,C16954T,T16986C,A25223G,T25686A,C27535T	0	0	6	6	19293-19557	ORF1b:1942-2030		3000	0	good	265	10	0
hCoV-19/USA/WI-MHDL-2021110447/2021|EPI_ISL_6861957|2021-11-08	hCoV-19/USA/WI-MHDL-2021110447/2021	EPI_ISL_6861957	2021-11-08	21J	AY.100	B.1.617.2.100	21J	Delta	21J (Delta)	4.34028	good	47	13	0	0	260	0	36	4	0	87	89200	39	29854	0.988396	false	G210T,C241T,A532T,C2508T,C3037T,G4181T,C5812T,C6402T,C7124T,C8986T,G9053T,C9133A,C9559T,C10029T,A11201G,A11332G,C13329T,C14408T,C15240T,G15451A,C16466T,G17122T,G17427T,C19220T,A21487G,C21618G,C21806A,C21846T,G21987A,T22917G,C22995A,A23403G,C23604G,G24410A,C25469T,T26767C,T27638C,C27752T,C27874T,A27985T,T28007C,C28432T,A28461G,G28881T,G28916T,G29402T,G29742T	22029-22034,28248-28253,28271			M:I82T,N:D63G,N:R203M,N:G215C,N:D377Y,ORF1a:P748L,ORF1a:A1306S,ORF1a:P2046L,ORF1a:P2287S,ORF1a:V2930L,ORF1a:T3255I,ORF1a:T3646A,ORF1a:T4355I,ORF1b:P314L,ORF1b:G662S,ORF1b:P1000L,ORF1b:A1219S,ORF1b:A1918V,ORF1b:K2674E,ORF3a:S26L,ORF7a:V82A,ORF7a:T120I,ORF7b:T40I,ORF8:Y31F,ORF9b:S50L,ORF9b:T60A,S:T19R,S:P82T,S:T95I,S:G142D,S:R158G,S:L452R,S:T478K,S:D614G,S:P681R,S:D950N	ORF8:D119-,ORF8:F120-,S:E156-,S:F157-			C28432T|21J	A532T,C2508T,C5812T,C9133A,C13329T,G17427T,A21487G,C21806A,A27985T	0	1	9	10	19294-19553	ORF1b:1943-2029		3000	0	good	260	10	0
hCoV-19/USA/WI-MHDL-2021110448/2021|EPI_ISL_6861958|2021-11-08	hCoV-19/USA/WI-MHDL-2021110448/2021	EPI_ISL_6861958	2021-11-08	21J	AY.120.1	B.1.617.2.120.1	21J	Delta	21J (Delta)	0.253717	good	43	13	0	0	436	0	32	4	0	148	89216	39	29854	0.98251	false	G210T,C241T,C2716T,C3037T,C3738T,G4181T,C6402T,C6408T,C7124T,G7936T,C8986T,G9053T,C10029T,C11095T,A11201G,A11332G,C14408T,G15451A,C16466T,C18252T,C19220T,C21618G,C21846T,G21987A,T22917G,C22995A,A23403G,C23604G,C24382T,G24410A,A25003G,C25469T,T25717C,A25897G,T26767C,T27638C,C27752T,C27874T,A28461G,G28881T,G28916T,C29675T,G29742T	22029-22034,28248-28253,28271			M:I82T,N:D63G,N:R203M,N:G215C,ORF1a:P1158L,ORF1a:A1306S,ORF1a:P2046L,ORF1a:S2048F,ORF1a:P2287S,ORF1a:V2930L,ORF1a:T3255I,ORF1a:T3646A,ORF1b:P314L,ORF1b:G662S,ORF1b:P1000L,ORF1b:A1918V,ORF3a:S26L,ORF3a:Y109H,ORF3a:I169V,ORF7a:V82A,ORF7a:T120I,ORF7b:T40I,ORF9b:T60A,S:T19R,S:T95I,S:G142D,S:R158G,S:L452R,S:T478K,S:D614G,S:P681R,S:D950N	ORF8:D119-,ORF8:F120-,S:E156-,S:F157-				C2716T,C3738T,G7936T,C18252T,C24382T,T25717C,A25897G,C29675T	0	0	8	8	19294-19557,21163-21167,27540-27577,29371-29499	N:366-409,ORF1b:1943-2030,ORF1b:2566-2567,ORF7a:49-62		3000	5.03704	good	436	10	0
hCoV-19/USA/WI-MHDL-2021110451/2021|EPI_ISL_6861961|2021-11-08	hCoV-19/USA/WI-MHDL-2021110451/2021	EPI_ISL_6861961	2021-11-08	21J	AY.119	B.1.617.2.119	21J	Delta	21J (Delta)	0	good	42	16	0	0	256	0	34	5	0	86	89204	39	29854	0.98853	false	G210T,C241T,C3037T,G4181T,C6402T,C7124T,A8812G,C8829T,T8869C,C8986T,G9053T,C10029T,A11201G,A11332G,A12526C,C12756T,C14408T,G15451A,C16466T,C17678T,G19006T,C19220T,C21618G,C21846T,G21987A,T22423C,T22917G,C22995A,A23403G,C23604G,C23987T,G24410A,C25469T,T26767C,T27638C,C27752T,C27874T,A28461G,G28881T,G28916T,G29402T,G29742T	22029-22034,27526-27528,28248-28253,28271			M:I82T,N:D63G,N:R203M,N:G215C,N:D377Y,ORF1a:A1306S,ORF1a:P2046L,ORF1a:P2287S,ORF1a:A2855V,ORF1a:V2930L,ORF1a:T3255I,ORF1a:T3646A,ORF1a:T4164I,ORF1b:P314L,ORF1b:G662S,ORF1b:P1000L,ORF1b:T1404M,ORF1b:A1847S,ORF1b:A1918V,ORF3a:S26L,ORF7a:V82A,ORF7a:T120I,ORF7b:T40I,ORF9b:T60A,S:T19R,S:T95I,S:G142D,S:R158G,S:L452R,S:T478K,S:D614G,S:P681R,S:P809S,S:D950N	ORF7a:P45-,ORF8:D119-,ORF8:F120-,S:E156-,S:F157-				A8812G,T8869C,A12526C,C12756T,C17678T,T22423C,C23987T	0	0	7	7	19298-19553	ORF1b:1944-2029		3000	0	good	256	10	0
hCoV-19/USA/WI-MHDL-2021110510/2021|EPI_ISL_7368707|2021-11-08	hCoV-19/USA/WI-MHDL-2021110510/2021	EPI_ISL_7368707	2021-11-08	21J	AY.103	B.1.617.2.103	21J	Delta	21J (Delta)	2.77778	good	39	13	0	0	274	0	31	4	0	92	89130	55	29836	0.986791	false	G210T,C241T,C3037T,C3653T,G4181T,C6402T,G6421T,C7124T,C8986T,G9053T,C10029T,A11201G,A11332G,G13762A,C14408T,G15451A,C16466T,A17236G,C18252T,C19220T,C21618G,T22917G,C22995A,A23403G,C23604G,C24208T,G24410A,C25469T,T26767C,T27291C,C27532T,T27638C,C27752T,C27874T,A28461G,G28881T,G28916T,G29402T,G29742T	22029-22034,28248-28253,28271			M:I82T,N:D63G,N:R203M,N:G215C,N:D377Y,ORF1a:L1130F,ORF1a:A1306S,ORF1a:P2046L,ORF1a:P2287S,ORF1a:V2930L,ORF1a:T3255I,ORF1a:T3646A,ORF1b:G99S,ORF1b:P314L,ORF1b:G662S,ORF1b:P1000L,ORF1b:I1257V,ORF1b:A1918V,ORF3a:S26L,ORF7a:H47Y,ORF7a:V82A,ORF7a:T120I,ORF7b:T40I,ORF9b:T60A,S:T19R,S:R158G,S:L452R,S:T478K,S:D614G,S:P681R,S:D950N	ORF8:D119-,ORF8:F120-,S:E156-,S:F157-			T27291C|21J,C27532T|22B	C3653T,G6421T,G13762A,C18252T	0	2	4	6	21717-21990	S:52-143		3000	0	good	274	10	0
hCoV-19/USA/WI-MHDL-2021110511/2021|EPI_ISL_7368708|2021-11-08	hCoV-19/USA/WI-MHDL-2021110511/2021	EPI_ISL_7368708	2021-11-08	21J	AY.25	B.1.617.2.25	21J	Delta	21J (Delta)	25	good	41	41	0	1	274	0	32	14	0	110	89016	55	29836	0.986791	false	G210T,C241T,C3037T,G4181T,C6402T,C7124T,C8986T,G9053T,C10029T,A11201G,A11332G,G12801A,C13860T,C14408T,G15451A,C16466T,C19220T,C21618G,G22801T,T22917G,C22995A,A23403G,C23604G,G24410A,C25469T,A25910C,G26107C,T26767C,A27507C,C27625T,T27638C,C27752T,C27874T,C27999T,A28461G,G28881T,G28916T,G29402T,G29422T,G29648T,G29742T	509-523,22029-22034,27579-27581,27694-27703,28248-28253,28271		ORF7a:105-122	M:I82T,N:D63G,N:R203M,N:G215C,N:D377Y,ORF1a:A1306S,ORF1a:P2046L,ORF1a:P2287S,ORF1a:V2930L,ORF1a:T3255I,ORF1a:T3646A,ORF1a:R4179K,ORF1b:P314L,ORF1b:G662S,ORF1b:P1000L,ORF1b:A1918V,ORF3a:S26L,ORF3a:D173A,ORF3a:E239Q,ORF7a:F63H,ORF7a:R78C,ORF7a:V82A,ORF7b:T40I,ORF8:P36S,ORF9b:T60A,S:T19R,S:R158G,S:L452R,S:T478K,S:D614G,S:P681R,S:D950N	ORF1a:G82-,ORF1a:H83-,ORF1a:V84-,ORF1a:M85-,ORF1a:V86-,ORF7a:Q62-,ORF7a:F101-,ORF7a:L102-,ORF7a:I103-,ORF7a:V104-,ORF8:D119-,ORF8:F120-,S:E156-,S:F157-			G12801A|21J,C13860T|20J,G22801T|21J	A25910C,C27625T,C27999T,G29422T,G29648T	0	3	5	8	21717-21990	ORF7a:105-122,S:52-143		3000	0	good	274	10	0
hCoV-19/USA/WI-MHDL-2021110512/2021|EPI_ISL_7368709|2021-11-08	hCoV-19/USA/WI-MHDL-2021110512/2021	EPI_ISL_7368709	2021-11-08	21J	AY.100	B.1.617.2.100	21J	Delta	21J (Delta)	2.77778	good	44	13	0	0	274	0	34	4	0	92	89110	55	29836	0.986791	false	G210T,C241T,C335T,C3037T,G4181T,C6402T,C7124T,T8242C,C8986T,G9053T,C9559T,C10029T,A11201G,A11332G,C11916T,C12493A,C14408T,C15240T,G15451A,C16466T,G17122T,C19220T,C21618G,G22225T,G22335T,T22917G,C22995A,A23403G,C23604G,G24410A,A25003G,C25469T,T26767C,G27604A,T27638C,C27752T,C27874T,T28007C,A28461G,G28817A,G28881T,G28916T,G29402T,G29742T	22029-22034,28248-28253,28271			M:I82T,N:D63G,N:A182T,N:R203M,N:G215C,N:D377Y,ORF1a:R24C,ORF1a:A1306S,ORF1a:P2046L,ORF1a:P2287S,ORF1a:V2930L,ORF1a:T3255I,ORF1a:T3646A,ORF1a:S3884L,ORF1a:D4076E,ORF1b:P314L,ORF1b:G662S,ORF1b:P1000L,ORF1b:A1219S,ORF1b:A1918V,ORF3a:S26L,ORF7a:V71I,ORF7a:V82A,ORF7a:T120I,ORF7b:T40I,ORF9b:T60A,S:T19R,S:R158G,S:W258L,S:L452R,S:T478K,S:D614G,S:P681R,S:D950N	ORF8:D119-,ORF8:F120-,S:E156-,S:F157-			G27604A|21J	C335T,T8242C,C11916T,C12493A,G22225T,G22335T,A25003G,G28817A	0	1	8	9	21717-21990	S:52-143		3000	0	good	274	10	0
hCoV-19/USA/WI-MHDL-2021110513/2021|EPI_ISL_7368710|2021-11-08	hCoV-19/USA/WI-MHDL-2021110513/2021	EPI_ISL_7368710	2021-11-08	21J	AY.44	B.1.617.2.44	21J	Delta	21J (Delta)	65.4704	mediocre	43	13	0	0	1356	0	33	4	0	456	89114	55	29836	0.950607	false	G210T,C241T,C829T,C3037T,G4181T,C6040T,C6402T,C6638T,C7926T,C8986T,G9053T,C10029T,A11201G,A11332G,T14014G,C14408T,G15451A,T15750C,C16466T,C16726T,T18537A,C19220T,C21575T,C21618G,T22917G,C22995A,A23403G,C23604G,G24410A,C25469T,C25836T,T26767C,T27638C,C27752T,C27874T,G28028T,G28073T,A28461G,G28881T,G28916T,G29402T,A29700G,G29742T	22029-22034,28248-28253,28271			M:I82T,N:D63G,N:R203M,N:G215C,N:D377Y,ORF1a:A1306S,ORF1a:P2046L,ORF1a:H2125Y,ORF1a:A2554V,ORF1a:V2930L,ORF1a:T3255I,ORF1a:T3646A,ORF1b:F183V,ORF1b:P314L,ORF1b:G662S,ORF1b:P1000L,ORF1b:H1087Y,ORF1b:A1918V,ORF3a:S26L,ORF7a:V82A,ORF7a:T120I,ORF7b:T40I,ORF8:W45C,ORF8:L60F,ORF9b:T60A,S:L5F,S:T19R,S:R158G,S:L452R,S:T478K,S:D614G,S:P681R,S:D950N	ORF8:D119-,ORF8:F120-,S:E156-,S:F157-			C6638T|21J,C7926T|21J&21K,C16726T|21J,C21575T|21J&21F,G28073T|21J	C829T,T15750C,T18537A,C25836T,G28028T	0	5	5	10	7093-7332,10738-11022,13364-13625,19276-19570,21717-21990	ORF1a:2276-2356,ORF1a:3491-3586,ORF1a:4367-4401,ORF1b:1-53,ORF1b:1937-2035,S:52-143		3000	39.1111	mediocre	1356	10	0
hCoV-19/USA/WI-MHDL-2021110514/2021|EPI_ISL_7368712|2021-11-08	hCoV-19/USA/WI-MHDL-2021110514/2021	EPI_ISL_7368712	2021-11-08	21J	AY.103	B.1.617.2.103	21J	Delta	21J (Delta)	0	good	39	13	0	0	276	0	31	4	0	94	89130	55	29836	0.986724	false	G210T,C241T,C3037T,G4181T,C6402T,C7124T,C8986T,G9053T,C10029T,T10190C,C10712T,C10993T,A11201G,A11332G,T11629C,C14408T,G15451A,C16111T,C16466T,A17236G,G18449T,C19220T,C21618G,T22917G,C22995A,A23403G,C23604G,C24208T,G24410A,C25469T,T26767C,T27638C,C27752T,C27874T,A28461G,G28881T,G28916T,G29402T,G29742T	22029-22034,28248-28253,28271			M:I82T,N:D63G,N:R203M,N:G215C,N:D377Y,ORF1a:A1306S,ORF1a:P2046L,ORF1a:P2287S,ORF1a:V2930L,ORF1a:T3255I,ORF1a:S3309P,ORF1a:L3483F,ORF1a:T3646A,ORF1b:P314L,ORF1b:G662S,ORF1b:P1000L,ORF1b:I1257V,ORF1b:S1661I,ORF1b:A1918V,ORF3a:S26L,ORF7a:V82A,ORF7a:T120I,ORF7b:T40I,ORF9b:T60A,S:T19R,S:R158G,S:L452R,S:T478K,S:D614G,S:P681R,S:D950N	ORF8:D119-,ORF8:F120-,S:E156-,S:F157-				T10190C,C10712T,C10993T,T11629C,C16111T,G18449T	0	0	6	6	10246,21717-21990,25699	ORF1a:3327,ORF3a:103,S:52-143		3000	0	good	276	10	0
hCoV-19/USA/WI-MHDL-2021120001/2021|EPI_ISL_7153306|2021-11-08	hCoV-19/USA/WI-MHDL-2021120001/2021	EPI_ISL_7153306	2021-11-08	21J	AY.119	B.1.617.2.119	21J	Delta	21J (Delta)	0	good	39	13	0	0	274	0	34	4	0	92	89130	55	29836	0.986791	false	G210T,C241T,C3037T,C4084T,G4181T,T4242C,C6402T,C7124T,C8829T,C8986T,G9053T,C10029T,A11201G,A11332G,C12756T,G13397A,C14408T,G15451A,C16466T,G19006T,C19220T,C21618G,T22917G,C22995A,A23403G,C23604G,C23987T,G24410A,C25469T,T25679C,T26767C,T27638C,C27752T,C27874T,A28461G,G28881T,G28916T,G29402T,G29742T	22029-22034,28248-28253,28271			M:I82T,N:D63G,N:R203M,N:G215C,N:D377Y,ORF1a:A1306S,ORF1a:I1326T,ORF1a:P2046L,ORF1a:P2287S,ORF1a:A2855V,ORF1a:V2930L,ORF1a:T3255I,ORF1a:T3646A,ORF1a:T4164I,ORF1a:G4378S,ORF1b:P314L,ORF1b:G662S,ORF1b:P1000L,ORF1b:A1847S,ORF1b:A1918V,ORF3a:S26L,ORF3a:L96P,ORF7a:V82A,ORF7a:T120I,ORF7b:T40I,ORF9b:T60A,S:T19R,S:R158G,S:L452R,S:T478K,S:D614G,S:P681R,S:P809S,S:D950N	ORF8:D119-,ORF8:F120-,S:E156-,S:F157-				C4084T,T4242C,C12756T,G13397A,C23987T,T25679C	0	0	6	6	21717-21990	S:52-143		3000	0	good	274	10	0
hCoV-19/USA/WI-MHDL-2021120002/2021|EPI_ISL_7153358|2021-11-08	hCoV-19/USA/WI-MHDL-2021120002/2021	EPI_ISL_7153358	2021-11-08	21J	AY.103	B.1.617.2.103	21J	Delta	21J (Delta)	40.0551	mediocre	43	19	0	0	569	0	32	6	0	191	89089	55	29836	0.976925	false	G210T,C241T,C3037T,G4181T,C6402T,T6661C,C7124T,C8140T,C8986T,G9053T,C10029T,A11201G,A11332G,C11750T,G12202T,C14120T,C14408T,G15451A,C16466T,A17236G,C19220T,C21618G,T22917G,C22995A,A23403G,C23604G,C24208T,G24410A,C24826T,C25469T,T26767C,T27291C,G27459A,T27638C,C27752T,C27874T,G27967A,A28461G,G28881T,G28916T,G29402T,C29545T,G29742T	515-520,22029-22034,28248-28253,28271			M:I82T,N:D63G,N:R203M,N:G215C,N:D377Y,ORF1a:A1306S,ORF1a:P2046L,ORF1a:P2287S,ORF1a:V2930L,ORF1a:T3255I,ORF1a:T3646A,ORF1a:L3829F,ORF1a:K3979N,ORF1b:P218L,ORF1b:P314L,ORF1b:G662S,ORF1b:P1000L,ORF1b:I1257V,ORF1b:A1918V,ORF3a:S26L,ORF7a:V82A,ORF7a:T120I,ORF7b:T40I,ORF8:C25Y,ORF9b:T60A,S:T19R,S:R158G,S:L452R,S:T478K,S:D614G,S:P681R,S:D950N	ORF1a:V84-,ORF1a:M85-,ORF8:D119-,ORF8:F120-,S:E156-,S:F157-			C8140T|22A,C11750T|22E&22B&23B,C14120T|20I,T27291C|21J	T6661C,G12202T,C24826T,G27459A,G27967A,C29545T	0	4	6	10	19276-19570,21717-21990	ORF1b:1937-2035,S:52-143		3000	9.96296	good	569	10	0
hCoV-19/USA/WI-MHDL-2021120003/2021|EPI_ISL_7153344|2021-11-08	hCoV-19/USA/WI-MHDL-2021120003/2021	EPI_ISL_7153344	2021-11-08	21J	AY.4	B.1.617.2.4	21J	Delta	21J (Delta)	1.16901	good	42	13	0	0	486	0	33	4	0	164	89118	55	29836	0.979701	false	G210T,C241T,G1268A,A1431T,C3037T,G4181T,C5079T,C6402T,C6726T,C7124T,C7851T,C8986T,G9053T,C10029T,C10156T,C10519T,A11201G,C11322T,A11332G,C14408T,G15451A,C16466T,C19220T,C19269T,C21618G,G22051C,T22917G,C22995A,A23403G,C23604G,G24410A,C25469T,T26767C,A27525G,T27638C,C27752T,C27874T,A28461G,G28881T,G28916T,G29402T,G29742T	22029-22034,28248-28253,28271			M:I82T,N:D63G,N:R203M,N:G215C,N:D377Y,ORF1a:D335N,ORF1a:N389I,ORF1a:A1306S,ORF1a:T1605I,ORF1a:P2046L,ORF1a:T2154I,ORF1a:P2287S,ORF1a:A2529V,ORF1a:V2930L,ORF1a:T3255I,ORF1a:T3646A,ORF1a:A3686V,ORF1b:P314L,ORF1b:G662S,ORF1b:P1000L,ORF1b:A1918V,ORF3a:S26L,ORF7a:V82A,ORF7a:T120I,ORF7b:T40I,ORF9b:T60A,S:T19R,S:R158G,S:L452R,S:T478K,S:D614G,S:P681R,S:D950N	ORF8:D119-,ORF8:F120-,S:E156-,S:F157-				G1268A,A1431T,C5079T,C6726T,C10156T,C10519T,C11322T,C19269T,G22051C,A27525G	0	0	10	10	6847-7058,21717-21990	ORF1a:2194-2265,S:52-143		3000	6.88889	good	486	10	0
hCoV-19/USA/WI-MHDL-2021120005/2021|EPI_ISL_7153369|2021-11-08	hCoV-19/USA/WI-MHDL-2021120005/2021	EPI_ISL_7153369	2021-11-08	21J	AY.103	B.1.617.2.103	21J	Delta	21J (Delta)	10.2946	good	39	7	0	0	843	0	28	2	0	284	89156	55	29836	0.967762	false	T65C,G210T,C241T,C313T,C3037T,G4181T,A5177G,C6402T,C7124T,C8986T,G9053T,C10029T,A11201G,A11332G,C11572T,C12624A,A13962G,C14408T,G15451A,C16466T,A17236G,C19220T,C20603T,C21618G,A23403G,C23604G,C24208T,G24410A,C25469T,T26767C,T27291C,T27638C,C27752T,C27874T,A28461G,G28881T,G28916T,G29402T,G29742T	28248-28253,28271			M:I82T,N:D63G,N:R203M,N:G215C,N:D377Y,ORF1a:A1306S,ORF1a:T1638A,ORF1a:P2046L,ORF1a:P2287S,ORF1a:V2930L,ORF1a:T3255I,ORF1a:T3646A,ORF1a:P4120H,ORF1b:P314L,ORF1b:G662S,ORF1b:P1000L,ORF1b:I1257V,ORF1b:A1918V,ORF1b:S2379L,ORF3a:S26L,ORF7a:V82A,ORF7a:T120I,ORF7b:T40I,ORF9b:T60A,S:T19R,S:D614G,S:P681R,S:D950N	ORF8:D119-,ORF8:F120-			C313T|20B,T27291C|21J	T65C,A5177G,C11572T,C12624A,A13962G,C20603T	0	2	6	8	2827,10802,21717-22290,22878-23144	ORF1a:854,ORF1a:3513,S:52-243,S:439-528		3000	20.1111	good	843	10	0
hCoV-19/USA/WI-MHDL-2021120008/2021|EPI_ISL_7153355|2021-11-08	hCoV-19/USA/WI-MHDL-2021120008/2021	EPI_ISL_7153355	2021-11-08	21J	AY.103	B.1.617.2.103	21J	Delta	21J (Delta)	0.992606	good	39	13	0	0	569	0	31	4	0	191	89130	55	29836	0.976925	false	G210T,C241T,C3037T,G4181T,C6402T,C7124T,C8986T,G9053T,C10029T,A11201G,A11332G,A11973C,C12525T,C14408T,T15114C,G15451A,C16329T,C16466T,A17236G,C19220T,C21618G,G22103C,C22450T,T22917G,C22995A,A23403G,C23604G,C24208T,G24410A,C25469T,T26767C,T27638C,C27752T,C27874T,A28461G,G28881T,G28916T,G29402T,G29742T	22029-22034,28248-28253,28271			M:I82T,N:D63G,N:R203M,N:G215C,N:D377Y,ORF1a:A1306S,ORF1a:P2046L,ORF1a:P2287S,ORF1a:V2930L,ORF1a:T3255I,ORF1a:T3646A,ORF1a:D3903A,ORF1a:T4087I,ORF1b:P314L,ORF1b:G662S,ORF1b:P1000L,ORF1b:I1257V,ORF1b:A1918V,ORF3a:S26L,ORF7a:V82A,ORF7a:T120I,ORF7b:T40I,ORF9b:T60A,S:T19R,S:R158G,S:G181R,S:L452R,S:T478K,S:D614G,S:P681R,S:D950N	ORF8:D119-,ORF8:F120-,S:E156-,S:F157-				A11973C,C12525T,T15114C,C16329T,G22103C,C22450T	0	0	6	6	19276-19570,21717-21990	ORF1b:1937-2035,S:52-143		3000	9.96296	good	569	10	0
hCoV-19/USA/WI-MHDL-2021120011/2021|EPI_ISL_7153309|2021-11-08	hCoV-19/USA/WI-MHDL-2021120011/2021	EPI_ISL_7153309	2021-11-08	21I	AY.37	B.1.617.2.37	21I	Delta	21I (Delta)	0	good	36	13	0	0	274	0	28	4	0	92	89142	55	29836	0.986791	false	G210T,C241T,G2185T,C2509T,C3037T,C5184T,A5584G,C9891T,T11418C,C11514T,C13019T,C14408T,G15451A,C16466T,C18167T,T20911C,C21618G,C22227T,G22661C,T22917G,T22981C,C22995A,A23403G,C23604G,G24410A,C25469T,G25555T,T26767C,T27638C,C27752T,A28461G,C28638T,G28881T,G29402T,C29541T,G29742T	22029-22034,28248-28253,28271			M:I82T,N:D63G,N:P122L,N:R203M,N:D377Y,ORF1a:E640D,ORF1a:P1640L,ORF1a:A3209V,ORF1a:V3718A,ORF1a:T3750I,ORF1b:P314L,ORF1b:G662S,ORF1b:P1000L,ORF1b:P1567L,ORF3a:S26L,ORF3a:V55F,ORF7a:V82A,ORF7a:T120I,ORF9b:T60A,S:T19R,S:R158G,S:A222V,S:V367L,S:L452R,S:T478K,S:D614G,S:P681R,S:D950N	ORF8:D119-,ORF8:F120-,S:E156-,S:F157-				C18167T,G22661C,T22981C,G25555T,C28638T,C29541T	0	0	6	6	21717-21990	S:52-143		3000	0	good	274	10	0
hCoV-19/USA/WI-MHDL-2021120012/2021|EPI_ISL_7153346|2021-11-08	hCoV-19/USA/WI-MHDL-2021120012/2021	EPI_ISL_7153346	2021-11-08	21J	AY.100	B.1.617.2.100	21J	Delta	21J (Delta)	3.50975	good	44	13	0	0	531	0	34	4	0	178	89110	55	29836	0.978196	false	G210T,C241T,C335T,C3037T,G4181T,C6402T,C7124T,T8242C,C8986T,G9053T,C9559T,C10029T,A11201G,A11332G,C11916T,C12493A,C14408T,C15240T,G15451A,C16466T,G17122T,C19220T,C21618G,G22225T,G22335T,T22917G,C22995A,A23403G,C23604G,G24410A,A25003G,C25469T,T26767C,G27604A,T27638C,C27752T,C27874T,T28007C,A28461G,G28817A,G28881T,G28916T,G29402T,G29742T	22029-22034,28248-28253,28271			M:I82T,N:D63G,N:A182T,N:R203M,N:G215C,N:D377Y,ORF1a:R24C,ORF1a:A1306S,ORF1a:P2046L,ORF1a:P2287S,ORF1a:V2930L,ORF1a:T3255I,ORF1a:T3646A,ORF1a:S3884L,ORF1a:D4076E,ORF1b:P314L,ORF1b:G662S,ORF1b:P1000L,ORF1b:A1219S,ORF1b:A1918V,ORF3a:S26L,ORF7a:V71I,ORF7a:V82A,ORF7a:T120I,ORF7b:T40I,ORF9b:T60A,S:T19R,S:R158G,S:W258L,S:L452R,S:T478K,S:D614G,S:P681R,S:D950N	ORF8:D119-,ORF8:F120-,S:E156-,S:F157-			G27604A|21J	C335T,T8242C,C11916T,C12493A,G22225T,G22335T,A25003G,G28817A	0	1	8	9	9246-9502,21717-21990	ORF1a:2994-3079,S:52-143		3000	8.55556	good	531	10	0
hCoV-19/USA/WI-MHDL-2021120013/2021|EPI_ISL_7153350|2021-11-08	hCoV-19/USA/WI-MHDL-2021120013/2021	EPI_ISL_7153350	2021-11-08	21J	AY.100	B.1.617.2.100	21J	Delta	21J (Delta)	3.50975	good	44	13	0	0	531	0	34	4	0	178	89110	55	29836	0.978196	false	G210T,C241T,C335T,C3037T,G4181T,C6402T,C7124T,T8242C,C8986T,G9053T,C9559T,C10029T,A11201G,A11332G,C11916T,C12493A,C14408T,C15240T,G15451A,C16466T,G17122T,C19220T,C21618G,G22225T,G22335T,T22917G,C22995A,A23403G,C23604G,G24410A,A25003G,C25469T,T26767C,G27604A,T27638C,C27752T,C27874T,T28007C,A28461G,G28817A,G28881T,G28916T,G29402T,G29742T	22029-22034,28248-28253,28271			M:I82T,N:D63G,N:A182T,N:R203M,N:G215C,N:D377Y,ORF1a:R24C,ORF1a:A1306S,ORF1a:P2046L,ORF1a:P2287S,ORF1a:V2930L,ORF1a:T3255I,ORF1a:T3646A,ORF1a:S3884L,ORF1a:D4076E,ORF1b:P314L,ORF1b:G662S,ORF1b:P1000L,ORF1b:A1219S,ORF1b:A1918V,ORF3a:S26L,ORF7a:V71I,ORF7a:V82A,ORF7a:T120I,ORF7b:T40I,ORF9b:T60A,S:T19R,S:R158G,S:W258L,S:L452R,S:T478K,S:D614G,S:P681R,S:D950N	ORF8:D119-,ORF8:F120-,S:E156-,S:F157-			G27604A|21J	C335T,T8242C,C11916T,C12493A,G22225T,G22335T,A25003G,G28817A	0	1	8	9	9246-9502,21717-21990	ORF1a:2994-3079,S:52-143		3000	8.55556	good	531	10	0
hCoV-19/USA/WI-MHDL-2021120014/2021|EPI_ISL_7153367|2021-11-08	hCoV-19/USA/WI-MHDL-2021120014/2021	EPI_ISL_7153367	2021-11-08	21J	AY.103	B.1.617.2.103	21J	Delta	21J (Delta)	6.7482	good	39	13	0	0	838	0	30	4	0	283	89130	55	29836	0.96793	false	G210T,C241T,A1515G,A2182G,C3037T,G4181T,A5073C,C6402T,C7124T,C7321T,C8986T,G9053T,C10029T,C11008T,A11332G,C14408T,G15451A,C16466T,A17236G,C19220T,G19999T,C21618G,A23403G,C23604G,C24208T,G24410A,C25469T,T25514G,T26767C,T27291C,T27638C,C27752T,C27874T,A28349T,A28461G,G28881T,G28916T,G29402T,G29742T	22029-22034,28248-28253,28271			M:I82T,N:S26C,N:D63G,N:R203M,N:G215C,N:D377Y,ORF1a:H417R,ORF1a:A1306S,ORF1a:D1603A,ORF1a:P2046L,ORF1a:P2287S,ORF1a:V2930L,ORF1a:T3255I,ORF1b:P314L,ORF1b:G662S,ORF1b:P1000L,ORF1b:I1257V,ORF1b:A1918V,ORF1b:V2178F,ORF3a:S26L,ORF3a:L41R,ORF7a:V82A,ORF7a:T120I,ORF7b:T40I,ORF9b:T60A,S:T19R,S:R158G,S:D614G,S:P681R,S:D950N	ORF8:D119-,ORF8:F120-,S:E156-,S:F157-			T27291C|21J	A1515G,A2182G,A5073C,C7321T,C11008T,G19999T,T25514G,A28349T	0	1	8	9	11201,19276-19570,21717-21990,22878-23144,28007	ORF1a:3646,ORF1b:1937-2035,ORF8:38,S:52-143,S:439-528		3000	19.9259	good	838	10	0
hCoV-19/USA/WI-MHDL-2021120015/2021|EPI_ISL_7153364|2021-11-08	hCoV-19/USA/WI-MHDL-2021120015/2021	EPI_ISL_7153364	2021-11-08	21J	AY.100	B.1.617.2.100	21J	Delta	21J (Delta)	4.21778	good	44	13	0	0	624	0	35	4	0	210	89110	55	29836	0.975086	false	G210T,C241T,C3037T,G4181T,C6402T,C7124T,C8986T,G9053T,C9559T,C10029T,A11201G,A11332G,C14408T,C15240T,G15451A,C16466T,C16954T,G17122T,C19220T,G20718T,C21618G,T22917G,G22936A,C22995A,A23403G,C23604G,G24410A,C25469T,G25696C,A25744G,T26767C,T27638C,C27752T,C27874T,A27985T,T28007C,A28365C,C28432T,A28461G,A28880G,G28881T,G28916T,G29402T,G29742T	22029-22034,28248-28253,28271			M:I82T,N:E31A,N:D63G,N:R203V,N:G215C,N:D377Y,ORF1a:A1306S,ORF1a:P2046L,ORF1a:P2287S,ORF1a:V2930L,ORF1a:T3255I,ORF1a:T3646A,ORF1b:P314L,ORF1b:G662S,ORF1b:P1000L,ORF1b:A1219S,ORF1b:A1918V,ORF1b:M2417I,ORF3a:S26L,ORF3a:E102Q,ORF3a:I118V,ORF7a:V82A,ORF7a:T120I,ORF7b:T40I,ORF8:Y31F,ORF9b:N28H,ORF9b:S50L,ORF9b:T60A,S:T19R,S:R158G,S:L452R,S:T478K,S:D614G,S:P681R,S:D950N	ORF8:D119-,ORF8:F120-,S:E156-,S:F157-			C28432T|21J	C16954T,G20718T,G22936A,G25696C,A25744G,A27985T,A28365C,A28880G	0	1	8	9	9246-9502,19478-19570,21717-21990	ORF1a:2994-3079,ORF1b:2004-2035,S:52-143		3000	12	good	624	10	0
hCoV-19/USA/WI-MHDL-2021120016/2021|EPI_ISL_7153361|2021-11-08	hCoV-19/USA/WI-MHDL-2021120016/2021	EPI_ISL_7153361	2021-11-08	21J	AY.3	B.1.617.2.3	21J	Delta	21J (Delta)	0.992606	good	39	13	0	0	569	0	31	4	0	191	88617	55	29665	0.971207	false	C106T,G210T,C241T,C1616T,C3037T,G4181T,C6402T,C7124T,C8986T,G9053T,C10029T,A11201G,A11332G,A11456G,C14408T,G15451A,G15961A,C16466T,C19220T,C21618G,T22917G,C22995A,T23284C,G23401T,A23403G,C23604G,G24410A,C25339T,C25469T,T26767C,T27638C,C27752T,C27874T,A28461G,G28881T,G28916T,G29050A,G29402T,C29509T	22029-22034,28248-28253,28271			M:I82T,N:D63G,N:R203M,N:G215C,N:D377Y,ORF1a:L451F,ORF1a:A1306S,ORF1a:P2046L,ORF1a:P2287S,ORF1a:V2930L,ORF1a:T3255I,ORF1a:T3646A,ORF1a:I3731V,ORF1b:P314L,ORF1b:G662S,ORF1b:G832S,ORF1b:P1000L,ORF1b:A1918V,ORF3a:S26L,ORF7a:V82A,ORF7a:T120I,ORF7b:T40I,ORF9b:T60A,S:T19R,S:R158G,S:L452R,S:T478K,S:Q613H,S:D614G,S:P681R,S:D950N	ORF8:D119-,ORF8:F120-,S:E156-,S:F157-				C106T,C1616T,G15961A,G23401T	0	0	4	4	19276-19570,21717-21990	ORF1b:1937-2035,S:52-143		3000	9.96296	good	569	10	0
hCoV-19/USA/WI-MHDL-2021120017/2021|EPI_ISL_7153311|2021-11-08	hCoV-19/USA/WI-MHDL-2021120017/2021	EPI_ISL_7153311	2021-11-08	21J	AY.44	B.1.617.2.44	21J	Delta	21J (Delta)	76.5625	mediocre	48	13	0	0	274	0	35	4	0	92	89094	55	29836	0.986791	false	G210T,C241T,T2092G,C3037T,G4181T,C6040T,C6402T,G6566T,C6638T,C7124T,C7926T,C8986T,G9053T,C9541T,C10029T,A11201G,A11332G,T14014G,C14408T,G15451A,C16466T,C16726T,T16773C,C19220T,C21618G,T22917G,C22995A,A23403G,G23593T,C23604G,C23635T,C23854T,G24410A,C25469T,A26098G,T26767C,T27638C,C27752T,C27874T,G28073T,G28460A,A28461G,G28881T,G28916T,G29402T,G29593T,A29700G,G29742T	22029-22034,28248-28253,28271			M:I82T,N:D63S,N:R203M,N:G215C,N:D377Y,ORF1a:A1306S,ORF1a:P2046L,ORF1a:D2101Y,ORF1a:H2125Y,ORF1a:P2287S,ORF1a:A2554V,ORF1a:V2930L,ORF1a:T3255I,ORF1a:T3646A,ORF1b:F183V,ORF1b:P314L,ORF1b:G662S,ORF1b:P1000L,ORF1b:H1087Y,ORF1b:A1918V,ORF3a:S26L,ORF3a:I236V,ORF7a:V82A,ORF7a:T120I,ORF7b:T40I,ORF8:L60F,ORF9b:T60A,S:T19R,S:R158G,S:L452R,S:T478K,S:D614G,S:Q677H,S:P681R,S:D950N	ORF8:D119-,ORF8:F120-,S:E156-,S:F157-			C6638T|21J,C7926T|21J&21K,C16726T|21J,G23593T|20D,G28073T|21J	T2092G,G6566T,C9541T,T16773C,C23635T,C23854T,A26098G,G28460A,G29593T	0	5	9	14	21717-21990	S:52-143		3000	0	good	274	10	0
hCoV-19/USA/WI-MHDL-2021120019/2021|EPI_ISL_7153314|2021-11-08	hCoV-19/USA/WI-MHDL-2021120019/2021	EPI_ISL_7153314	2021-11-08	21J	AY.103	B.1.617.2.103	21J	Delta	21J (Delta)	1.5625	good	41	13	0	0	274	0	33	4	0	92	89122	55	29836	0.986791	false	G210T,C241T,C1284T,C2147T,C3037T,G4181T,C4543A,C6402T,C7124T,C8986T,G9053T,C10029T,C10340T,A11201G,A11332G,C11752A,G13201A,C14408T,G15451A,C16466T,A17236G,C19220T,C21618G,G22205C,T22917G,C22995A,A23403G,C23604G,C24208T,G24410A,C25469T,T26767C,A27345T,T27638C,C27752T,C27874T,A28461G,G28881T,G28916T,G29402T,G29742T	22029-22034,28248-28253,28271			M:I82T,N:D63G,N:R203M,N:G215C,N:D377Y,ORF1a:T340I,ORF1a:L628F,ORF1a:A1306S,ORF1a:P2046L,ORF1a:P2287S,ORF1a:V2930L,ORF1a:T3255I,ORF1a:P3359S,ORF1a:T3646A,ORF1b:P314L,ORF1b:G662S,ORF1b:P1000L,ORF1b:I1257V,ORF1b:A1918V,ORF3a:S26L,ORF6:K48N,ORF7a:V82A,ORF7a:T120I,ORF7b:T40I,ORF9b:T60A,S:T19R,S:R158G,S:D215H,S:L452R,S:T478K,S:D614G,S:P681R,S:D950N	ORF8:D119-,ORF8:F120-,S:E156-,S:F157-			A27345T|21I	C1284T,C2147T,C4543A,C10340T,C11752A,G13201A,G22205C	0	1	7	8	21717-21990	S:52-143		3000	0	good	274	10	0
hCoV-19/USA/WI-MHDL-2021120032/2021|EPI_ISL_7281394|2021-11-08	hCoV-19/USA/WI-MHDL-2021120032/2021	EPI_ISL_7281394	2021-11-08	21J	AY.25	B.1.617.2.25	21J	Delta	21J (Delta)	6.71874	good	37	13	0	0	836	0	30	4	0	281	89138	55	29836	0.967997	false	G210T,C241T,C3037T,G4181T,C6402T,C7124T,C8986T,G9053T,C10029T,A11201G,A11332G,G12191T,G12801A,C14408T,G15451A,C16466T,C19220T,A20595G,C21618G,G22801T,A23403G,C23595T,C23604G,G24410A,G24926T,C25469T,G26107C,T26767C,A27507C,T27638C,C27752T,C27874T,A28461G,G28881T,G28916T,G29402T,G29742T	22029-22034,28248-28253,28271			M:I82T,N:D63G,N:R203M,N:G215C,N:D377Y,ORF1a:A1306S,ORF1a:P2046L,ORF1a:P2287S,ORF1a:V2930L,ORF1a:T3255I,ORF1a:T3646A,ORF1a:V3976F,ORF1a:R4179K,ORF1b:P314L,ORF1b:G662S,ORF1b:P1000L,ORF1b:A1918V,ORF3a:S26L,ORF3a:E239Q,ORF7a:V82A,ORF7a:T120I,ORF7b:T40I,ORF9b:T60A,S:T19R,S:R158G,S:D614G,S:T678I,S:P681R,S:D950N,S:V1122L	ORF8:D119-,ORF8:F120-,S:E156-,S:F157-			G12801A|21J,G22801T|21J	G12191T,A20595G,C23595T,G24926T	0	2	4	6	19276-19570,21717-21990,22878-23144	ORF1b:1937-2035,S:52-143,S:439-528		3000	19.8519	good	836	10	0
hCoV-19/USA/WI-MHDL-2021120033/2021|EPI_ISL_7281403|2021-11-08	hCoV-19/USA/WI-MHDL-2021120033/2021	EPI_ISL_7281403	2021-11-08	21J	AY.3	B.1.617.2.3	21J	Delta	21J (Delta)	2.77778	good	42	13	0	0	276	0	35	4	0	94	88605	55	29665	0.981005	false	G210T,C241T,G410T,T1623C,C3037T,G4181T,C6402T,C7124T,C8986T,G9053T,C10029T,A11201G,A11332G,A11456G,C12784T,C14318T,C14408T,G15438T,G15451A,C16466T,C18060T,C19220T,C19763T,C21618G,C22077A,T22917G,C22995A,A23403G,C23604G,G24410A,C25469T,G25855T,T26767C,T27638C,C27752T,C27874T,A28461G,G28881T,G28916T,G29050A,G29402T,C29509T	22029-22034,28248-28253,28271			M:I82T,N:D63G,N:R203M,N:G215C,N:D377Y,ORF1a:G49C,ORF1a:I453T,ORF1a:A1306S,ORF1a:P2046L,ORF1a:P2287S,ORF1a:V2930L,ORF1a:T3255I,ORF1a:T3646A,ORF1a:I3731V,ORF1b:T284I,ORF1b:P314L,ORF1b:M657I,ORF1b:G662S,ORF1b:P1000L,ORF1b:A1918V,ORF1b:T2099I,ORF3a:S26L,ORF3a:D155Y,ORF7a:V82A,ORF7a:T120I,ORF7b:T40I,ORF9b:T60A,S:T19R,S:R158G,S:S172Y,S:L452R,S:T478K,S:D614G,S:P681R,S:D950N	ORF8:D119-,ORF8:F120-,S:E156-,S:F157-			C18060T|19B	G410T,T1623C,C12784T,C14318T,G15438T,C19763T,C22077A,G25855T	0	1	8	9	21717-21990,22009-22010	S:52-143,S:149-150		3000	0	good	276	10	0
hCoV-19/USA/WI-MHDL-2021120034/2021|EPI_ISL_7281412|2021-11-08	hCoV-19/USA/WI-MHDL-2021120034/2021	EPI_ISL_7281412	2021-11-08	21J	AY.3	B.1.617.2.3	21J	Delta	21J (Delta)	0	good	38	13	0	0	275	0	30	4	0	93	88621	55	29665	0.981039	false	G210T,C241T,T2083C,C3037T,G4181T,C6402T,C7124T,C8986T,G9053T,C10029T,A11201G,A11332G,A11456G,C14408T,G15451A,C16466T,C19220T,C21618G,T22917G,C22995A,T23284C,A23403G,C23604G,G24410A,C25339T,C25469T,A26021C,T26767C,T27638C,C27752T,C27874T,G28373T,A28461G,G28881T,G28916T,G29050A,G29402T,C29509T	22029-22034,28248-28253,28271			M:I82T,N:G34W,N:D63G,N:R203M,N:G215C,N:D377Y,ORF1a:A1306S,ORF1a:P2046L,ORF1a:P2287S,ORF1a:V2930L,ORF1a:T3255I,ORF1a:T3646A,ORF1a:I3731V,ORF1b:P314L,ORF1b:G662S,ORF1b:P1000L,ORF1b:A1918V,ORF3a:S26L,ORF3a:D210A,ORF7a:V82A,ORF7a:T120I,ORF7b:T40I,ORF9b:T60A,S:T19R,S:R158G,S:L452R,S:T478K,S:D614G,S:P681R,S:D950N	ORF8:D119-,ORF8:F120-,S:E156-,S:F157-				T2083C,A26021C,G28373T	0	0	3	3	21717-21990,25699	ORF3a:103,S:52-143		3000	0	good	275	10	0
hCoV-19/USA/WI-MHDL-2021120036/2021|EPI_ISL_7281419|2021-11-08	hCoV-19/USA/WI-MHDL-2021120036/2021	EPI_ISL_7281419	2021-11-08	21J	AY.103	B.1.617.2.103	21J	Delta	21J (Delta)	2.43361	good	38	13	0	0	552	0	30	4	0	186	89134	55	29836	0.977494	false	G210T,C241T,C3037T,G4181T,C5100T,C6402T,G6421T,C7124T,C8986T,G9053T,C10029T,A11201G,A11332G,C14408T,G15451A,C16466T,A17236G,C19220T,C21618G,T22917G,C22995A,A23403G,C23604G,C24208T,G24410A,C25469T,G25621T,T26767C,T27291C,T27638C,C27752T,C27874T,T28031C,A28461G,G28881T,G28916T,G29402T,G29742T	22029-22034,28248-28253,28271			M:I82T,N:D63G,N:R203M,N:G215C,N:D377Y,ORF1a:A1306S,ORF1a:S1612L,ORF1a:P2046L,ORF1a:P2287S,ORF1a:V2930L,ORF1a:T3255I,ORF1a:T3646A,ORF1b:P314L,ORF1b:G662S,ORF1b:P1000L,ORF1b:I1257V,ORF1b:A1918V,ORF3a:S26L,ORF3a:V77F,ORF7a:V82A,ORF7a:T120I,ORF7b:T40I,ORF9b:T60A,S:T19R,S:R158G,S:L452R,S:T478K,S:D614G,S:P681R,S:D950N	ORF8:D119-,ORF8:F120-,S:E156-,S:F157-			C5100T|20H,T27291C|21J	G6421T,G25621T,T28031C	0	2	3	5	21717-21990,25647-25924	ORF3a:85-178,S:52-143		3000	9.33333	good	552	10	0
hCoV-19/USA/WI-MHDL-2021120061/2021|EPI_ISL_7809422|2021-11-08	hCoV-19/USA/WI-MHDL-2021120061/2021	EPI_ISL_7809422	2021-11-08	21J	AY.44	B.1.617.2.44	21J	Delta	21J (Delta)	143.163	bad	42	14	0	0	1017	0	31	4	0	348	89232	31	29853	0.963315	false	G210T,C241T,C3037T,G4181T,C6040T,C6402T,C6638T,C7124T,C7926T,C8986T,G9053T,C10029T,C10969T,A11201G,A11332G,C12763T,T14014G,C14408T,G15451A,C16466T,C16726T,G18412A,C19220T,C20646T,C21618G,T22917G,C22995A,A23403G,C23604G,G24410A,C25469T,T26767C,C27874T,G28073T,G28460A,A28461G,G28881T,G28916T,C29119T,G29402T,G29593T,G29742T	22029-22034,28248-28253,28271,29700			M:I82T,N:D63S,N:R203M,N:G215C,N:D377Y,ORF1a:A1306S,ORF1a:P2046L,ORF1a:H2125Y,ORF1a:P2287S,ORF1a:A2554V,ORF1a:V2930L,ORF1a:T3255I,ORF1a:T3646A,ORF1b:F183V,ORF1b:P314L,ORF1b:G662S,ORF1b:P1000L,ORF1b:H1087Y,ORF1b:V1649I,ORF1b:A1918V,ORF3a:S26L,ORF7b:T40I,ORF8:L60F,ORF9b:T60A,S:T19R,S:R158G,S:L452R,S:T478K,S:D614G,S:P681R,S:D950N	ORF8:D119-,ORF8:F120-,S:E156-,S:F157-		A21987G,T27752C	C6638T|21J,C7926T|21J&21K,C16726T|21J,G28073T|21J	C10969T,C12763T,G18412A,C20646T,G28460A,C29119T,G29593T	2	4	7	13	19294-19557,19997-20007,20023-20037,20052-20061,20087-20207,20314-20349,20437-20442,20452-20473,20478,21162-21371,21733-21808,21897-21968,27527-27658,27740-27744,27757-27792	ORF1b:1943-2030,ORF1b:2177-2180,ORF1b:2186-2190,ORF1b:2195-2198,ORF1b:2207-2247,ORF1b:2283-2294,ORF1b:2324-2325,ORF1b:2329-2337,ORF1b:2565-2635,ORF7a:45-89,ORF7a:116-117,ORF7a:122,ORF7b:1-13,S:57-82,S:112-136		3000	26.5556	good	1017	10	0
hCoV-19/USA/WI-MHDL-2021120063/2021|EPI_ISL_7829227|2021-11-08	hCoV-19/USA/WI-MHDL-2021120063/2021	EPI_ISL_7829227	2021-11-08	21J	AY.3	B.1.617.2.3	21J	Delta	21J (Delta)	2.78503	good	33	13	1	1	323	0	26	2	0	124	88745	39	29686	0.980671	false	G210T,C241T,C3037T,G4181T,C6402T,C7124T,C8986T,G9053T,C10029T,A11201G,A11332G,A11456G,C14408T,G15451A,C16466T,C19220T,C21618G,T22917G,C22995A,T23284C,A23403G,C23604G,G24410A,C25339T,C25469T,T26767C,C27874T,A28461G,G28881T,G28916T,G29050A,G29402T,C29509T	22029-22034,28248-28253,28271	28214:T	ORF8:108-122	M:I82T,N:D63G,N:R203M,N:G215C,N:D377Y,ORF1a:A1306S,ORF1a:P2046L,ORF1a:P2287S,ORF1a:V2930L,ORF1a:T3255I,ORF1a:T3646A,ORF1a:I3731V,ORF1b:P314L,ORF1b:G662S,ORF1b:P1000L,ORF1b:A1918V,ORF3a:S26L,ORF7b:T40I,ORF9b:T60A,S:T19R,S:R158G,S:L452R,S:T478K,S:D614G,S:P681R,S:D950N	S:E156-,S:F157-		A21987G,C27638T			2	0	0	2	19294-19557,27733-27791	ORF1b:1943-2030,ORF7a:114-122,ORF7b:1-12,ORF8:108-122		3000	0.851852	good	323	10	0
hCoV-19/USA/WI-MHDL-2021120064/2021|EPI_ISL_7809423|2021-11-08	hCoV-19/USA/WI-MHDL-2021120064/2021	EPI_ISL_7809423	2021-11-08	21J	AY.117	B.1.617.2.117	21J	Delta	21J (Delta)	79.5285	mediocre	45	13	0	0	765	0	35	4	0	258	89199	39	29851	0.971408	false	G210T,C241T,A1808C,G2202T,C2245A,C3037T,A3722G,G4181T,C6402T,C7124T,C8986T,G9053T,C10029T,A11201G,A11332G,G14186T,C14408T,G15451A,G15768A,C15810T,C16466T,C16877T,G17790T,C19220T,C21618G,T22917G,C22995A,C23373T,A23403G,A23416T,C23604G,G24199T,G24410A,C25469T,G25793T,T26767C,A27123G,C27752T,C27874T,A28461G,C28708T,G28881T,G28916T,G29402T,G29742T	22029-22034,28248-28253,28271			M:I82T,M:I201V,N:D63G,N:R203M,N:G215C,N:D377Y,ORF1a:K515Q,ORF1a:W646L,ORF1a:I1153V,ORF1a:A1306S,ORF1a:P2046L,ORF1a:P2287S,ORF1a:V2930L,ORF1a:T3255I,ORF1a:T3646A,ORF1b:R240M,ORF1b:P314L,ORF1b:G662S,ORF1b:P1000L,ORF1b:T1137I,ORF1b:Q1441H,ORF1b:A1918V,ORF3a:S26L,ORF3a:R134L,ORF7a:T120I,ORF7b:T40I,ORF9b:T60A,S:T19R,S:R158G,S:L452R,S:T478K,S:T604I,S:D614G,S:P681R,S:D950N	ORF8:D119-,ORF8:F120-,S:E156-,S:F157-		T21846C,A21987G,C27638T		A1808C,C2245A,A3722G,G15768A,C16877T,G17790T,C23373T,A23416T,G24199T,G25793T,A27123G	3	0	11	14	2264-2514,19297-19558,21162-21369,21923-21929,27528-27564	ORF1a:667-750,ORF1b:1944-2031,ORF1b:2565-2634,ORF7a:45-57,S:121-123		3000	17.2222	good	765	10	0
hCoV-19/USA/WI-MHDL-2021120065/2021|EPI_ISL_7809424|2021-11-08	hCoV-19/USA/WI-MHDL-2021120065/2021	EPI_ISL_7809424	2021-11-08	21J	AY.103	B.1.617.2.103	21J	Delta	21J (Delta)	12.3022	good	37	13	0	0	826	0	29	4	0	282	89231	39	29851	0.969368	false	G210T,C241T,C1288T,C3037T,G4181T,C6402T,T6661C,C7124T,C8986T,G9053T,C10029T,A11201G,A11332G,C14408T,G15451A,C16466T,A17236G,C19220T,A20567G,C21618G,T22917G,C22995A,A23403G,C23457T,C23604G,C24208T,G24410A,C25469T,T26767C,T27291C,C27874T,G27967A,A28461G,G28881T,G28916T,G29402T,G29742T	22029-22034,28248-28253,28271			M:I82T,N:D63G,N:R203M,N:G215C,N:D377Y,ORF1a:A1306S,ORF1a:P2046L,ORF1a:P2287S,ORF1a:V2930L,ORF1a:T3255I,ORF1a:T3646A,ORF1b:P314L,ORF1b:G662S,ORF1b:P1000L,ORF1b:I1257V,ORF1b:A1918V,ORF1b:K2367R,ORF3a:S26L,ORF7b:T40I,ORF8:C25Y,ORF9b:T60A,S:T19R,S:R158G,S:L452R,S:T478K,S:D614G,S:T632I,S:P681R,S:D950N	ORF8:D119-,ORF8:F120-,S:E156-,S:F157-		A21987G	T27291C|21J	C1288T,T6661C,A20567G,C23457T,G27967A	1	1	5	7	19291-19558,20452-20480,21162-21284,21333-21366,21836-21858,21884-21978,27528-27677,27687-27726,27728-27791	ORF1b:1942-2031,ORF1b:2329-2338,ORF1b:2565-2606,ORF1b:2622-2633,ORF7a:45-95,ORF7a:98-122,ORF7b:1-12,S:92-99,S:108-139		3000	19.4815	good	826	10	0
hCoV-19/USA/WI-MHDL-2021120066/2021|EPI_ISL_7809425|2021-11-08	hCoV-19/USA/WI-MHDL-2021120066/2021	EPI_ISL_7809425	2021-11-08	21J	AY.103	B.1.617.2.103	21J	Delta	21J (Delta)	25.0073	good	36	13	0	0	1573	0	28	4	0	540	89211	39	29843	0.944119	false	G210T,C241T,C3037T,G4181T,C6402T,C7124T,C8986T,G9053T,C10029T,A11201G,A11332G,A11973C,C12525T,C14408T,T15114C,G15451A,C16329T,C16466T,A17236G,C19220T,C21618G,G22103C,C22450T,T22917G,C22995A,A23403G,C23604G,C24208T,G24410A,C25469T,T26767C,C27874T,A28461G,G28881T,G28916T,G29742T	22029-22034,28248-28253,28271			M:I82T,N:D63G,N:R203M,N:G215C,ORF1a:A1306S,ORF1a:P2046L,ORF1a:P2287S,ORF1a:V2930L,ORF1a:T3255I,ORF1a:T3646A,ORF1a:D3903A,ORF1a:T4087I,ORF1b:P314L,ORF1b:G662S,ORF1b:P1000L,ORF1b:I1257V,ORF1b:A1918V,ORF3a:S26L,ORF7b:T40I,ORF9b:T60A,S:T19R,S:R158G,S:G181R,S:L452R,S:T478K,S:D614G,S:P681R,S:D950N	ORF8:D119-,ORF8:F120-,S:E156-,S:F157-		A21987G		A11973C,C12525T,T15114C,C16329T,G22103C,C22450T	1	0	6	7	2580-2615,3526-3563,3577-3582,3605-3754,3767-3780,5261-5270,6993-7003,7019-7047,19298-19312,19326-19558,19930-19966,20301-20306,20311-20358,20374-20391,20405-20473,21161-21422,21733-21978,27525-27803,29373-29391,29398-29444	N:367-373,N:375-391,ORF1a:772-784,ORF1a:1087-1100,ORF1a:1104-1106,ORF1a:1114-1163,ORF1a:1168-1172,ORF1a:1666-1669,ORF1a:2243-2246,ORF1a:2252-2261,ORF1b:1944-1949,ORF1b:1953-2031,ORF1b:2155-2167,ORF1b:2278-2280,ORF1b:2282-2297,ORF1b:2303-2308,ORF1b:2313-2336,ORF1b:2565-2652,ORF7a:44-122,ORF7b:1-16,S:57-139		3000	47.1481	mediocre	1573	10	0
hCoV-19/USA/WI-MHDL-2021120067/2021|EPI_ISL_7809426|2021-11-08	hCoV-19/USA/WI-MHDL-2021120067/2021	EPI_ISL_7809426	2021-11-08	21J	AY.44	B.1.617.2.44	21J	Delta	21J (Delta)	62.6736	mediocre	43	13	0	0	265	0	33	4	0	89	89207	39	29851	0.988128	false	G210T,C241T,C2232T,C3037T,G4181T,C5654T,C6040T,C6402T,C6638T,C7124T,C7926T,C8986T,G9053T,C10029T,A11201G,A11332G,T14014G,C14408T,G15451A,T15750C,C16466T,C16726T,C19220T,G20925A,C21618G,T22917G,C22995A,A23403G,C23604G,G24410A,C25469T,C25836T,T26767C,T27638C,C27752T,C27874T,G28073T,A28461G,G28881T,G28916T,G29402T,A29700G,G29742T	22029-22034,28248-28253,28271			M:I82T,N:D63G,N:R203M,N:G215C,N:D377Y,ORF1a:A656V,ORF1a:A1306S,ORF1a:P2046L,ORF1a:H2125Y,ORF1a:P2287S,ORF1a:A2554V,ORF1a:V2930L,ORF1a:T3255I,ORF1a:T3646A,ORF1b:F183V,ORF1b:P314L,ORF1b:G662S,ORF1b:P1000L,ORF1b:H1087Y,ORF1b:A1918V,ORF3a:S26L,ORF7a:V82A,ORF7a:T120I,ORF7b:T40I,ORF8:L60F,ORF9b:T60A,S:T19R,S:R158G,S:L452R,S:T478K,S:D614G,S:P681R,S:D950N	ORF8:D119-,ORF8:F120-,S:E156-,S:F157-		A21987G	C6638T|21J,C7926T|21J&21K,C16726T|21J,G28073T|21J	C2232T,C5654T,T15750C,G20925A,C25836T	1	4	5	10	19294-19558	ORF1b:1943-2031		3000	0	good	265	10	0
hCoV-19/USA/WI-MHDL-2021120068/2021|EPI_ISL_7809427|2021-11-08	hCoV-19/USA/WI-MHDL-2021120068/2021	EPI_ISL_7809427	2021-11-08	21J	AY.103	B.1.617.2.103	21J	Delta	21J (Delta)	39.0625	mediocre	37	13	0	0	274	0	29	4	0	93	89237	39	29853	0.987894	false	G210T,C241T,C3037T,G4181T,C5100T,C6402T,G6421T,C7124T,C8986T,G9053T,C10029T,A11201G,A11332G,C14408T,G15451A,C16466T,A17236G,C19220T,C21618G,G21987A,T22917G,C22995A,A23403G,C23604G,C24208T,G24410A,C25469T,G25621T,T26767C,T27291C,C27874T,T28031C,A28461G,G28881T,G28916T,G29402T,G29742T	22029-22034,28248-28253,28271			M:I82T,N:D63G,N:R203M,N:G215C,N:D377Y,ORF1a:A1306S,ORF1a:S1612L,ORF1a:P2046L,ORF1a:P2287S,ORF1a:V2930L,ORF1a:T3255I,ORF1a:T3646A,ORF1b:P314L,ORF1b:G662S,ORF1b:P1000L,ORF1b:I1257V,ORF1b:A1918V,ORF3a:S26L,ORF3a:V77F,ORF7b:T40I,ORF9b:T60A,S:T19R,S:G142D,S:R158G,S:L452R,S:T478K,S:D614G,S:P681R,S:D950N	ORF8:D119-,ORF8:F120-,S:E156-,S:F157-		C27638T,T27752C	C5100T|20H,T27291C|21J	G6421T,G25621T,T28031C	2	2	3	7	19294-19558,27530-27533,27712-27716	ORF1b:1943-2031,ORF7a:46-47,ORF7a:107-108		3000	0	good	274	10	0
hCoV-19/USA/WI-MHDL-2021120069/2021|EPI_ISL_7809428|2021-11-08	hCoV-19/USA/WI-MHDL-2021120069/2021	EPI_ISL_7809428	2021-11-08	21J	AY.103	B.1.617.2.103	21J	Delta	21J (Delta)	1.5625	good	37	13	0	0	202	0	29	4	0	72	89237	39	29853	0.990302	false	G210T,C241T,C3037T,G4181T,C6402T,A6907C,C7124T,C8986T,G9053T,C10029T,A11201G,A11332G,C14408T,G15451A,C16466T,A17236G,A18360G,C19220T,C21618G,T22917G,C22995A,A23403G,C23604G,C24208T,G24410A,C25469T,C25702T,T26767C,T27638C,C27874T,A28461G,C28606T,G28881T,G28895T,G28916T,G29402T,G29742T	22029-22034,28248-28253,28271			M:I82T,N:D63G,N:R203M,N:A208S,N:G215C,N:D377Y,ORF1a:A1306S,ORF1a:P2046L,ORF1a:P2287S,ORF1a:V2930L,ORF1a:T3255I,ORF1a:T3646A,ORF1b:P314L,ORF1b:G662S,ORF1b:P1000L,ORF1b:I1257V,ORF1b:A1918V,ORF3a:S26L,ORF3a:P104S,ORF7a:V82A,ORF7b:T40I,ORF9b:T60A,S:T19R,S:R158G,S:L452R,S:T478K,S:D614G,S:P681R,S:D950N	ORF8:D119-,ORF8:F120-,S:E156-,S:F157-		A21987G		A6907C,A18360G,C25702T,C28606T,G28895T	1	0	5	6	19297-19422,19432-19439,19523-19531,19545-19557,27733-27760,27762-27776,27788-27790	ORF1b:1944-1985,ORF1b:1989-1991,ORF1b:2019-2022,ORF1b:2026-2030,ORF7a:114-122,ORF7b:1-7,ORF7b:11-12		3000	0	good	202	10	0
hCoV-19/USA/WI-MHDL-2021120070/2021|EPI_ISL_7809429|2021-11-08	hCoV-19/USA/WI-MHDL-2021120070/2021	EPI_ISL_7809429	2021-11-08	21J	AY.103	B.1.617.2.103	21J	Delta	21J (Delta)	78.8684	mediocre	42	13	0	0	710	0	31	4	0	242	89217	39	29853	0.973314	false	G210T,C241T,G1335C,G1738T,C3037T,A3780G,G4181T,G4255A,A5450C,C6402T,C7124T,C8597T,C8986T,G9053T,G9086A,C10029T,A11201G,A11332G,C14408T,A15210G,G15451A,C16466T,A17236G,C19220T,T21408C,C21575T,C21618G,T22917G,C22995A,A23403G,C23604G,C24208T,G24410A,C25469T,T26767C,T27291C,C27874T,A28461G,G28881T,G28916T,G29402T,G29742T	22029-22034,28248-28253,28271			M:I82T,N:D63G,N:R203M,N:G215C,N:D377Y,ORF1a:C357S,ORF1a:N1172S,ORF1a:A1306S,ORF1a:P2046L,ORF1a:P2287S,ORF1a:L2778F,ORF1a:V2930L,ORF1a:G2941S,ORF1a:T3255I,ORF1a:T3646A,ORF1b:P314L,ORF1b:G662S,ORF1b:P1000L,ORF1b:I1257V,ORF1b:A1918V,ORF3a:S26L,ORF7b:T40I,ORF9b:T60A,S:L5F,S:T19R,S:R158G,S:L452R,S:T478K,S:D614G,S:P681R,S:D950N	ORF8:D119-,ORF8:F120-,S:E156-,S:F157-		A21987G,T27752C	C21575T|21J&21F,T27291C|21J	G1335C,G1738T,A3780G,G4255A,A5450C,C8597T,G9086A,A15210G,T21408C	2	2	9	13	19298-19551,21163-21288,21293-21343,21357-21366,21917-21943,27528-27744,27759-27760,27763-27783,27789-27790	ORF1b:1944-2028,ORF1b:2566-2607,ORF1b:2609-2626,ORF1b:2630-2633,ORF7a:45-117,ORF7a:122,ORF7b:2-10,ORF7b:12,S:119-127		3000	15.1852	good	710	10	0
hCoV-19/USA/WI-MHDL-2021120071/2021|EPI_ISL_7809430|2021-11-08	hCoV-19/USA/WI-MHDL-2021120071/2021	EPI_ISL_7809430	2021-11-08	21J	AY.103	B.1.617.2.103	21J	Delta	21J (Delta)	6.25	good	45	13	0	0	264	0	32	4	0	88	89208	39	29854	0.988262	false	G210T,C241T,T2827C,C3037T,G4181T,C6402T,C7124T,C8986T,G9053T,T9544C,C10029T,C10802T,A11201G,A11332G,C11572T,C12624A,A13653G,A13962G,C14408T,G15451A,C16466T,A17236G,T17784C,C19220T,C21618G,G21974C,G21987A,T22917G,C22995A,A23403G,C23604G,C24208T,G24410A,C25469T,T26767C,T27291C,C27493T,T27638C,C27752T,C27874T,A28461G,G28881T,G28916T,G29402T,G29742T	22029-22034,28248-28253,28271			M:I82T,N:D63G,N:R203M,N:G215C,N:D377Y,ORF1a:A1306S,ORF1a:P2046L,ORF1a:P2287S,ORF1a:V2930L,ORF1a:T3255I,ORF1a:T3646A,ORF1a:P4120H,ORF1b:P314L,ORF1b:G662S,ORF1b:P1000L,ORF1b:I1257V,ORF1b:A1918V,ORF3a:S26L,ORF7a:P34S,ORF7a:V82A,ORF7a:T120I,ORF7b:T40I,ORF9b:T60A,S:T19R,S:D138H,S:G142D,S:R158G,S:L452R,S:T478K,S:D614G,S:P681R,S:D950N	ORF8:D119-,ORF8:F120-,S:E156-,S:F157-			T27291C|21J	T2827C,T9544C,C10802T,C11572T,C12624A,A13653G,A13962G,T17784C,G21974C,C27493T	0	1	10	11	19294-19557	ORF1b:1943-2030		3000	0	good	264	10	0
hCoV-19/USA/WI-MHDL-2021120074/2021|EPI_ISL_7809431|2021-11-08	hCoV-19/USA/WI-MHDL-2021120074/2021	EPI_ISL_7809431	2021-11-08	21J	AY.103	B.1.617.2.103	21J	Delta	21J (Delta)	17.3611	good	38	13	0	0	267	0	30	4	0	94	89233	39	29853	0.988128	false	G210T,C241T,C3037T,G4181T,C6402T,C7124T,C8986T,G9053T,C10029T,A11201G,A11332G,A11973C,C12525T,C14408T,T15114C,G15451A,C16329T,C16466T,A17236G,C19220T,C21618G,G22103C,C22450T,T22917G,C22995A,A23403G,C23604G,C24208T,G24410A,C25469T,T26767C,C27752T,C27874T,A28461G,G28881T,G28916T,G29402T,G29742T	22029-22034,28248-28253,28271			M:I82T,N:D63G,N:R203M,N:G215C,N:D377Y,ORF1a:A1306S,ORF1a:P2046L,ORF1a:P2287S,ORF1a:V2930L,ORF1a:T3255I,ORF1a:T3646A,ORF1a:D3903A,ORF1a:T4087I,ORF1b:P314L,ORF1b:G662S,ORF1b:P1000L,ORF1b:I1257V,ORF1b:A1918V,ORF3a:S26L,ORF7a:T120I,ORF7b:T40I,ORF9b:T60A,S:T19R,S:R158G,S:G181R,S:L452R,S:T478K,S:D614G,S:P681R,S:D950N	ORF8:D119-,ORF8:F120-,S:E156-,S:F157-		A21987G,C27638T		A11973C,C12525T,T15114C,C16329T,G22103C,C22450T	2	0	6	8	19331-19348,19362-19365,19397-19414,19432-19557,21162-21206,27538-27560,27650-27654,27658-27685	ORF1b:1955-1961,ORF1b:1965-1966,ORF1b:1977-1983,ORF1b:1989-2030,ORF1b:2565-2580,ORF7a:49-56,ORF7a:86-87,ORF7a:89-98		3000	0	good	267	10	0
hCoV-19/USA/WI-MHDL-2021120075/2021|EPI_ISL_7809432|2021-11-08	hCoV-19/USA/WI-MHDL-2021120075/2021	EPI_ISL_7809432	2021-11-08	21J	AY.103	B.1.617.2.103	21J	Delta	21J (Delta)	57.7348	mediocre	39	13	0	0	629	0	30	4	0	214	89226	39	29852	0.975989	false	G210T,C241T,T2827C,C3037T,G4181T,C6402T,C7124T,C7681T,C8986T,G9053T,C10029T,A11201G,A11332G,C11572T,C12624A,C14408T,G14857T,G15451A,C16466T,A17236G,C19220T,C21618G,T22917G,C22995A,C23202T,A23403G,C23604G,C24208T,G24410A,C25469T,T26767C,T27291C,C27874T,A28461G,C28866T,G28881T,G28916T,G29402T,G29742T	22029-22034,28248-28253,28271			M:I82T,N:D63G,N:T198I,N:R203M,N:G215C,N:D377Y,ORF1a:A1306S,ORF1a:P2046L,ORF1a:P2287S,ORF1a:V2930L,ORF1a:T3255I,ORF1a:T3646A,ORF1a:P4120H,ORF1b:P314L,ORF1b:V464F,ORF1b:G662S,ORF1b:P1000L,ORF1b:I1257V,ORF1b:A1918V,ORF3a:S26L,ORF7b:T40I,ORF9b:T60A,S:T19R,S:R158G,S:L452R,S:T478K,S:T547I,S:D614G,S:P681R,S:D950N	ORF8:D119-,ORF8:F120-,S:E156-,S:F157-		A21987G,T27752C	C23202T|23B,T27291C|21J	T2827C,C7681T,C11572T,C12624A,G14857T,C28866T	2	2	6	10	19298-19303,19313-19315,19329-19548,21172-21368,27528-27730	ORF1b:1944-1946,ORF1b:1949-1950,ORF1b:1954-2027,ORF1b:2569-2634,ORF7a:45-113		3000	12.1852	good	629	10	0
hCoV-19/USA/WI-MHDL-2021120076/2021|EPI_ISL_7809433|2021-11-08	hCoV-19/USA/WI-MHDL-2021120076/2021	EPI_ISL_7809433	2021-11-08	21J	AY.103	B.1.617.2.103	21J	Delta	21J (Delta)	11.1111	good	40	13	0	0	259	0	30	4	0	87	89228	39	29854	0.988429	false	G210T,C241T,T348C,C3037T,G4181T,C6402T,C7124T,C8986T,G9053T,C10029T,A11201G,A11332G,C11572T,C14408T,G15451A,C16362T,C16466T,A17236G,C19220T,G21220T,C21618G,T22162C,T22917G,C22995A,A23403G,C23604G,C24208T,G24410A,C25469T,T26767C,C27002T,T27291C,T27638C,C27752T,C27874T,A28461G,G28881T,G28916T,G29402T,G29742T	22029-22034,28248-28253,28271			M:I82T,N:D63G,N:R203M,N:G215C,N:D377Y,ORF1a:V28A,ORF1a:A1306S,ORF1a:P2046L,ORF1a:P2287S,ORF1a:V2930L,ORF1a:T3255I,ORF1a:T3646A,ORF1b:P314L,ORF1b:G662S,ORF1b:P1000L,ORF1b:I1257V,ORF1b:A1918V,ORF1b:A2585S,ORF3a:S26L,ORF7a:V82A,ORF7a:T120I,ORF7b:T40I,ORF9b:T60A,S:T19R,S:R158G,S:L452R,S:T478K,S:D614G,S:P681R,S:D950N	ORF8:D119-,ORF8:F120-,S:E156-,S:F157-		A21987G	T27291C|21J	T348C,C11572T,C16362T,G21220T,T22162C,C27002T	1	1	6	8	19294-19552	ORF1b:1943-2029		3000	0	good	259	10	0
hCoV-19/USA/WI-MHDL-2021120077/2021|EPI_ISL_7809434|2021-11-08	hCoV-19/USA/WI-MHDL-2021120077/2021	EPI_ISL_7809434	2021-11-08	21J	AY.103	B.1.617.2.103	21J	Delta	21J (Delta)	0	good	40	13	0	0	259	0	32	4	0	87	89252	31	29854	0.988697	false	G210T,C241T,C3037T,G4181T,C6402T,C7124T,C8986T,G9053T,C10029T,A11201G,A11332G,A11973C,C12525T,C14408T,T15114C,G15451A,C16329T,C16466T,A17236G,C19220T,C21618G,G21987A,G22103C,C22450T,T22917G,C22995A,A23403G,C23604G,C24208T,G24410A,C25469T,T26767C,T27638C,C27752T,C27874T,A28461G,G28881T,G28916T,G29402T,G29742T	22029-22034,28248-28253,28271			M:I82T,N:D63G,N:R203M,N:G215C,N:D377Y,ORF1a:A1306S,ORF1a:P2046L,ORF1a:P2287S,ORF1a:V2930L,ORF1a:T3255I,ORF1a:T3646A,ORF1a:D3903A,ORF1a:T4087I,ORF1b:P314L,ORF1b:G662S,ORF1b:P1000L,ORF1b:I1257V,ORF1b:A1918V,ORF3a:S26L,ORF7a:V82A,ORF7a:T120I,ORF7b:T40I,ORF9b:T60A,S:T19R,S:G142D,S:R158G,S:G181R,S:L452R,S:T478K,S:D614G,S:P681R,S:D950N	ORF8:D119-,ORF8:F120-,S:E156-,S:F157-				A11973C,C12525T,T15114C,C16329T,G22103C,C22450T	0	0	6	6	19293-19551	ORF1b:1942-2028		3000	0	good	259	10	0
hCoV-19/USA/WI-MHDL-2021120078/2021|EPI_ISL_7809435|2021-11-08	hCoV-19/USA/WI-MHDL-2021120078/2021	EPI_ISL_7809435	2021-11-08	21J	AY.44	B.1.617.2.44	21J	Delta	21J (Delta)	62.675	mediocre	43	13	0	0	310	0	36	4	0	107	89216	39	29854	0.986724	false	G210T,C241T,C823T,C3037T,A3848G,G4181T,C5358T,T5600C,C6040T,C6402T,C6638T,C7124T,C7926T,C8986T,G9053T,C10029T,A11201G,A11332G,T14014G,C14408T,G15451A,C16466T,C16726T,C19220T,C21618G,G21987A,T22917G,C22995A,A23403G,C23604G,G24410A,C25469T,A26086G,T26767C,T27638C,C27874T,G28073T,A28461G,G28881T,G28916T,G29402T,A29700G,G29742T	22029-22034,28248-28253,28271			M:I82T,N:D63G,N:R203M,N:G215C,N:D377Y,ORF1a:S1195G,ORF1a:A1306S,ORF1a:A1698V,ORF1a:F1779L,ORF1a:P2046L,ORF1a:H2125Y,ORF1a:P2287S,ORF1a:A2554V,ORF1a:V2930L,ORF1a:T3255I,ORF1a:T3646A,ORF1b:F183V,ORF1b:P314L,ORF1b:G662S,ORF1b:P1000L,ORF1b:H1087Y,ORF1b:A1918V,ORF3a:S26L,ORF3a:I232V,ORF7a:V82A,ORF7b:T40I,ORF8:L60F,ORF9b:T60A,S:T19R,S:G142D,S:R158G,S:L452R,S:T478K,S:D614G,S:P681R,S:D950N	ORF8:D119-,ORF8:F120-,S:E156-,S:F157-		T27752C	C6638T|21J,C7926T|21J&21K,C16726T|21J,G28073T|21J	C823T,A3848G,C5358T,T5600C,A26086G	1	4	5	10	3769-3778,19294-19551,21234-21238,21248-21259,21272-21294,21308-21309	ORF1a:1168-1171,ORF1b:1943-2028,ORF1b:2589-2591,ORF1b:2594-2598,ORF1b:2602-2609,ORF1b:2614		3000	0.37037	good	310	10	0
hCoV-19/USA/WI-MHDL-2021120079/2021|EPI_ISL_7809436|2021-11-08	hCoV-19/USA/WI-MHDL-2021120079/2021	EPI_ISL_7809436	2021-11-08	21J	AY.44	B.1.617.2.44	21J	Delta	21J (Delta)	76.5625	mediocre	49	13	0	0	259	0	38	4	0	87	89219	31	29855	0.98873	false	G210T,C241T,C3037T,G4181T,C6040T,C6402T,C6638T,C7124T,C7926T,C8986T,G9053T,C10029T,C10969T,A11201G,A11332G,C12763T,C13329T,T14014G,C14408T,G15451A,C16466T,C16726T,G18412A,C19220T,C20646T,C21575T,C21618G,G21987A,T22917G,C22995A,A23403G,C23604G,G24410A,C25469T,T26767C,T27638C,C27752T,C27874T,G28073T,G28460A,A28461G,C28473T,G28881T,G28916T,C29119T,G29402T,G29593T,A29700G,G29742T	22029-22034,28248-28253,28271			M:I82T,N:D63S,N:P67L,N:R203M,N:G215C,N:D377Y,ORF1a:A1306S,ORF1a:P2046L,ORF1a:H2125Y,ORF1a:P2287S,ORF1a:A2554V,ORF1a:V2930L,ORF1a:T3255I,ORF1a:T3646A,ORF1a:T4355I,ORF1b:F183V,ORF1b:P314L,ORF1b:G662S,ORF1b:P1000L,ORF1b:H1087Y,ORF1b:V1649I,ORF1b:A1918V,ORF3a:S26L,ORF7a:V82A,ORF7a:T120I,ORF7b:T40I,ORF8:L60F,ORF9b:T60A,ORF9b:L64F,S:L5F,S:T19R,S:G142D,S:R158G,S:L452R,S:T478K,S:D614G,S:P681R,S:D950N	ORF8:D119-,ORF8:F120-,S:E156-,S:F157-			C6638T|21J,C7926T|21J&21K,C16726T|21J,C21575T|21J&21F,G28073T|21J	C10969T,C12763T,C13329T,G18412A,C20646T,G28460A,C28473T,C29119T,G29593T	0	5	9	14	19293-19551	ORF1b:1942-2028		3000	0	good	259	10	0
hCoV-19/USA/WI-MHDL-2021120080/2021|EPI_ISL_7809437|2021-11-08	hCoV-19/USA/WI-MHDL-2021120080/2021	EPI_ISL_7809437	2021-11-08	21J	AY.119	B.1.617.2.119	21J	Delta	21J (Delta)	0	good	40	13	0	0	132	0	33	4	0	44	89252	31	29854	0.992944	false	G210T,C241T,C3037T,G4181T,C6402T,C7124T,C8829T,C8986T,G9053T,C10029T,G11083T,A11201G,A11332G,G14087T,G14088T,C14408T,G15451A,C16466T,G19006T,C19220T,C21618G,C21846T,G21987A,T22917G,C22995A,A23403G,C23604G,G24410A,C25469T,C26606T,T26767C,T27638C,C27752T,C27874T,A28461G,G28881T,G28916T,G29402T,G29540T,G29742T	22029-22034,28248-28253,28271			M:I82T,N:D63G,N:R203M,N:G215C,N:D377Y,ORF1a:A1306S,ORF1a:P2046L,ORF1a:P2287S,ORF1a:A2855V,ORF1a:V2930L,ORF1a:T3255I,ORF1a:L3606F,ORF1a:T3646A,ORF1b:W207F,ORF1b:P314L,ORF1b:G662S,ORF1b:P1000L,ORF1b:A1847S,ORF1b:A1918V,ORF3a:S26L,ORF7a:V82A,ORF7a:T120I,ORF7b:T40I,ORF9b:T60A,S:T19R,S:T95I,S:G142D,S:R158G,S:L452R,S:T478K,S:D614G,S:P681R,S:D950N	ORF8:D119-,ORF8:F120-,S:E156-,S:F157-			G11083T|21J&19A	G14087T,G14088T,C26606T,G29540T	0	1	4	5	19291-19422	ORF1b:1942-1985		3000	0	good	132	10	0
hCoV-19/USA/WI-MHDL-2021120081/2021|EPI_ISL_7809438|2021-11-08	hCoV-19/USA/WI-MHDL-2021120081/2021	EPI_ISL_7809438	2021-11-08	21J	AY.118	B.1.617.2.118	21J	Delta	21J (Delta)	35.2459	mediocre	41	13	0	0	598	0	31	4	0	205	89215	39	29851	0.976992	false	G210T,C241T,T826C,C1420T,C3037T,G4181T,T5218C,C6402T,C7124T,C8986T,G9053T,T9643C,C10029T,C10279T,A11201G,A11332G,C14408T,C15352T,G15451A,C16466T,G18583T,C19220T,C21618G,T22917G,C22995A,A23403G,C23604G,T23728C,G24410A,C25469T,C26527T,T26767C,A27338T,C27874T,G28122T,A28461G,C28697T,G28881T,G28916T,G29402T,G29742T	22029-22034,28248-28253,28271			M:A2V,M:I82T,N:D63G,N:P142S,N:R203M,N:G215C,N:D377Y,ORF1a:A1306S,ORF1a:P2046L,ORF1a:P2287S,ORF1a:V2930L,ORF1a:T3255I,ORF1a:T3646A,ORF1b:P314L,ORF1b:L629F,ORF1b:G662S,ORF1b:P1000L,ORF1b:V1706L,ORF1b:A1918V,ORF3a:S26L,ORF6:E46V,ORF7b:T40I,ORF8:G77C,ORF9b:T60A,S:T19R,S:R158G,S:L452R,S:T478K,S:D614G,S:P681R,S:D950N	ORF8:D119-,ORF8:F120-,S:E156-,S:F157-		A21987G,T27752C		C1420T,T5218C,T9643C,C10279T,C15352T,G18583T,T23728C,C26527T,G28122T,C28697T	2	0	10	12	19298-19312,19326-19498,21734-21819,21833-21929,27539-27743,27757-27778	ORF1b:1944-1949,ORF1b:1953-2011,ORF7a:49-117,ORF7a:122,ORF7b:1-8,S:58-86,S:91-123		3000	11.037	good	598	10	0
hCoV-19/USA/WI-MHDL-2021120083/2021|EPI_ISL_7809439|2021-11-08	hCoV-19/USA/WI-MHDL-2021120083/2021	EPI_ISL_7809439	2021-11-08	21J	AY.103	B.1.617.2.103	21J	Delta	21J (Delta)	8.2308	good	43	13	0	0	680	0	30	4	0	231	89216	39	29854	0.97435	false	G210T,C241T,T2827C,C3037T,G4181T,C6402T,C7124T,C8986T,G9053T,T9544C,C10029T,C10802T,A11201G,A11332G,C11572T,C12624A,A13653G,A13962G,C14408T,G15451A,C16466T,A17236G,T17784C,C19220T,C21618G,G21974C,G21987A,T22917G,C22995A,A23403G,C23604G,C24208T,G24410A,C25469T,T26767C,T27291C,C27493T,C27874T,A28461G,G28881T,G28916T,G29402T,G29742T	22029-22034,28248-28253,28271			M:I82T,N:D63G,N:R203M,N:G215C,N:D377Y,ORF1a:A1306S,ORF1a:P2046L,ORF1a:P2287S,ORF1a:V2930L,ORF1a:T3255I,ORF1a:T3646A,ORF1a:P4120H,ORF1b:P314L,ORF1b:G662S,ORF1b:P1000L,ORF1b:I1257V,ORF1b:A1918V,ORF3a:S26L,ORF7a:P34S,ORF7b:T40I,ORF9b:T60A,S:T19R,S:D138H,S:G142D,S:R158G,S:L452R,S:T478K,S:D614G,S:P681R,S:D950N	ORF8:D119-,ORF8:F120-,S:E156-,S:F157-			T27291C|21J	T2827C,T9544C,C10802T,C11572T,C12624A,A13653G,A13962G,T17784C,G21974C,C27493T	0	1	10	11	19294-19541,19550-19551,21163-21351,21366,27528-27730,27737-27754,27767-27785	ORF1b:1943-2025,ORF1b:2028,ORF1b:2566-2628,ORF1b:2633,ORF7a:45-113,ORF7a:115-121,ORF7b:4-10		3000	14.0741	good	680	10	0
hCoV-19/USA/WI-MHDL-2021120084/2021|EPI_ISL_7809440|2021-11-08	hCoV-19/USA/WI-MHDL-2021120084/2021	EPI_ISL_7809440	2021-11-08	21J	AY.117	B.1.617.2.117	21J	Delta	21J (Delta)	17.3611	good	48	13	0	0	251	0	37	4	0	84	89187	39	29851	0.988596	false	G210T,C241T,A1808C,G2202T,C2245A,C3037T,A3722G,G4181T,C6402T,C7124T,C8986T,G9053T,C10029T,A11201G,A11332G,G14186T,C14408T,G15451A,G15768A,C15810T,C16466T,C16877T,C17172T,G17790T,C19220T,C21618G,C21846T,G21987A,T22917G,C22995A,C23373T,A23403G,A23416T,C23604G,G24199T,G24410A,C25469T,G25793T,T26767C,A27123G,C27752T,C27874T,A28461G,C28708T,G28881T,G28916T,G29402T,G29742T	22029-22034,28248-28253,28271			M:I82T,M:I201V,N:D63G,N:R203M,N:G215C,N:D377Y,ORF1a:K515Q,ORF1a:W646L,ORF1a:I1153V,ORF1a:A1306S,ORF1a:P2046L,ORF1a:P2287S,ORF1a:V2930L,ORF1a:T3255I,ORF1a:T3646A,ORF1b:R240M,ORF1b:P314L,ORF1b:G662S,ORF1b:P1000L,ORF1b:T1137I,ORF1b:Q1441H,ORF1b:A1918V,ORF3a:S26L,ORF3a:R134L,ORF7a:T120I,ORF7b:T40I,ORF9b:T60A,S:T19R,S:T95I,S:G142D,S:R158G,S:L452R,S:T478K,S:T604I,S:D614G,S:P681R,S:D950N	ORF8:D119-,ORF8:F120-,S:E156-,S:F157-		C27638T		A1808C,C2245A,A3722G,G15768A,C16877T,C17172T,G17790T,C23373T,A23416T,G24199T,G25793T,A27123G	1	0	12	13	19291-19508,19519-19551	ORF1b:1942-2014,ORF1b:2018-2028		3000	0	good	251	10	0
hCoV-19/USA/WI-MHDL-2021120085/2021|EPI_ISL_7809441|2021-11-08	hCoV-19/USA/WI-MHDL-2021120085/2021	EPI_ISL_7809441	2021-11-08	21J	AY.3	B.1.617.2.3	21J	Delta	21J (Delta)	39.0711	mediocre	39	13	3	0	325	0	31	4	1	109	88955	39	29764	0.983212	false	G210T,C241T,T2083C,C3037T,G4181T,C6402T,C7124T,C8986T,G9053T,C10029T,A11201G,A11332G,A11456G,C14408T,G15451A,C16466T,C19220T,C21618G,G21770A,T22917G,C22995A,T23284C,A23403G,C23604G,G24410A,C25339T,C25469T,A26021C,G26416T,T26767C,C27752T,C27874T,G28373T,A28461G,G28881T,G28916T,G29050A,G29402T,C29509T	22029-22034,28248-28253,28271	25701:CCC		E:V58F,M:I82T,N:G34W,N:D63G,N:R203M,N:G215C,N:D377Y,ORF1a:A1306S,ORF1a:P2046L,ORF1a:P2287S,ORF1a:V2930L,ORF1a:T3255I,ORF1a:T3646A,ORF1a:I3731V,ORF1b:P314L,ORF1b:G662S,ORF1b:P1000L,ORF1b:A1918V,ORF3a:S26L,ORF3a:D210A,ORF7a:T120I,ORF7b:T40I,ORF9b:T60A,S:T19R,S:V70I,S:R158G,S:L452R,S:T478K,S:D614G,S:P681R,S:D950N	ORF8:D119-,ORF8:F120-,S:E156-,S:F157-	ORF3a:103:P	A21987G,C27638T,T29742G		T2083C,G21770A,A26021C,G26416T,G28373T	3	0	5	8	19294-19557,27658-27718	ORF1b:1943-2030,ORF7a:89-109		3000	0.925926	good	325	10	0
hCoV-19/USA/WI-MHDL-2021120086/2021|EPI_ISL_7809442|2021-11-08	hCoV-19/USA/WI-MHDL-2021120086/2021	EPI_ISL_7809442	2021-11-08	21J	AY.3	B.1.617.2.3	21J	Delta	21J (Delta)	6.7452	good	39	13	3	0	490	0	29	4	1	168	88745	31	29686	0.975354	false	G210T,C241T,T2698C,G3025T,C3037T,G4181T,C4965T,C6402T,C7124T,C8986T,G9053T,C10029T,A11201G,A11332G,A11456G,C14408T,C14919T,G15451A,C16466T,C19220T,C21618G,G21987A,C22450T,T22917G,C22995A,T23284C,A23403G,C23604G,G24410A,C25339T,C25469T,T26767C,C27874T,A28461G,G28881T,G28916T,G29050A,G29402T,C29509T	22029-22034,28248-28253,28271	28214:TTT		M:I82T,N:D63G,N:R203M,N:G215C,N:D377Y,ORF1a:M920I,ORF1a:A1306S,ORF1a:T1567I,ORF1a:P2046L,ORF1a:P2287S,ORF1a:V2930L,ORF1a:T3255I,ORF1a:T3646A,ORF1a:I3731V,ORF1b:P314L,ORF1b:G662S,ORF1b:P1000L,ORF1b:A1918V,ORF3a:S26L,ORF7b:T40I,ORF9b:T60A,S:T19R,S:G142D,S:R158G,S:L452R,S:T478K,S:D614G,S:P681R,S:D950N	ORF8:D119-,ORF8:F120-,S:E156-,S:F157-	ORF8:107:F	T27752C	C4965T|21B	T2698C,G3025T,C14919T,C22450T	1	1	4	6	19294-19387,19407-19558,21295-21301,21321-21366,27528-27718	ORF1b:1943-1974,ORF1b:1980-2031,ORF1b:2610-2612,ORF1b:2618-2633,ORF7a:45-109		3000	7.03704	good	490	10	0
hCoV-19/USA/WI-MHDL-2021120087/2021|EPI_ISL_7809443|2021-11-08	hCoV-19/USA/WI-MHDL-2021120087/2021	EPI_ISL_7809443	2021-11-08	21J	AY.3	B.1.617.2.3	21J	Delta	21J (Delta)	56.9383	mediocre	38	13	3	0	524	0	28	4	1	178	88941	39	29758	0.976357	false	G210T,C241T,T2698C,G3025T,C3037T,G4181T,C4965T,C6402T,C7124T,C8986T,G9053T,C10029T,A11201G,A11332G,A11456G,C14408T,C14919T,G15451A,C16466T,C19220T,C21618G,C22450T,T22917G,C22995A,T23284C,A23403G,C23604G,G24410A,C25339T,C25469T,T26767C,C27874T,A28461G,G28881T,G28916T,G29050A,G29402T,C29509T	22029-22034,28248-28253,28271	28214:TTT		M:I82T,N:D63G,N:R203M,N:G215C,N:D377Y,ORF1a:M920I,ORF1a:A1306S,ORF1a:T1567I,ORF1a:P2046L,ORF1a:P2287S,ORF1a:V2930L,ORF1a:T3255I,ORF1a:T3646A,ORF1a:I3731V,ORF1b:P314L,ORF1b:G662S,ORF1b:P1000L,ORF1b:A1918V,ORF3a:S26L,ORF7b:T40I,ORF9b:T60A,S:T19R,S:R158G,S:L452R,S:T478K,S:D614G,S:P681R,S:D950N	ORF8:D119-,ORF8:F120-,S:E156-,S:F157-	ORF8:107:F	A21987G,T27752C,T29742G	C4965T|21B	T2698C,G3025T,C14919T,C22450T	3	1	4	8	19293-19442,19449-19557,21163-21193,21235-21293,27555-27716,27740-27749,29687-29689	ORF1b:1942-1992,ORF1b:1994-2030,ORF1b:2566-2576,ORF1b:2590-2609,ORF7a:54-108,ORF7a:116-119		3000	8.2963	good	524	10	0
hCoV-19/USA/WI-MHDL-2021120094/2021|EPI_ISL_7809450|2021-11-08	hCoV-19/USA/WI-MHDL-2021120094/2021	EPI_ISL_7809450	2021-11-08	21J	AY.103	B.1.617.2.103	21J	Delta	21J (Delta)	0	good	37	13	0	0	264	0	29	4	0	88	89240	39	29854	0.988262	false	G210T,C241T,C3037T,G4181T,C6402T,G6421T,C7124T,C7420T,C8986T,G9053T,C10029T,A11201G,A11332G,C14408T,G15451A,C16466T,A17236G,C19220T,C21618G,G21987A,T22917G,C22995A,A23403G,C23604G,C24208T,G24410A,C25469T,T26767C,T27291C,T27638C,C27752T,C27874T,A28461G,G28881T,G28916T,G29402T,G29742T	22029-22034,28248-28253,28271			M:I82T,N:D63G,N:R203M,N:G215C,N:D377Y,ORF1a:A1306S,ORF1a:P2046L,ORF1a:P2287S,ORF1a:V2930L,ORF1a:T3255I,ORF1a:T3646A,ORF1b:P314L,ORF1b:G662S,ORF1b:P1000L,ORF1b:I1257V,ORF1b:A1918V,ORF3a:S26L,ORF7a:V82A,ORF7a:T120I,ORF7b:T40I,ORF9b:T60A,S:T19R,S:G142D,S:R158G,S:L452R,S:T478K,S:D614G,S:P681R,S:D950N	ORF8:D119-,ORF8:F120-,S:E156-,S:F157-			T27291C|21J	G6421T,C7420T	0	1	2	3	19294-19557	ORF1b:1943-2030		3000	0	good	264	10	0
hCoV-19/USA/WI-MHDL-2021120095/2021|EPI_ISL_7809451|2021-11-08	hCoV-19/USA/WI-MHDL-2021120095/2021	EPI_ISL_7809451	2021-11-08	21J	AY.120.1	B.1.617.2.120.1	21J	Delta	21J (Delta)	0	good	41	40	0	0	254	0	30	13	0	85	89166	31	29856	0.988931	false	G210T,C241T,C2716T,C3037T,G4181T,C6402T,C6408T,C7124T,G7936T,C8986T,G9053T,C10029T,C11095T,A11201G,A11332G,C14408T,G15451A,G16377T,C16466T,C18252T,C19220T,C21618G,C21846T,G21987A,T22917G,C22995A,A23403G,C23604G,G24410A,A25003G,C25469T,T26767C,T27638C,C27752T,C27874T,A28461G,G28881T,G28916T,G29402T,C29675T,G29742T	22029-22034,27553-27579,28248-28253,28271			M:I82T,N:D63G,N:R203M,N:G215C,N:D377Y,ORF1a:A1306S,ORF1a:P2046L,ORF1a:S2048F,ORF1a:P2287S,ORF1a:V2930L,ORF1a:T3255I,ORF1a:T3646A,ORF1b:P314L,ORF1b:G662S,ORF1b:P1000L,ORF1b:A1918V,ORF3a:S26L,ORF7a:V82A,ORF7a:T120I,ORF7b:T40I,ORF9b:T60A,S:T19R,S:T95I,S:G142D,S:R158G,S:L452R,S:T478K,S:D614G,S:P681R,S:D950N	ORF7a:F54-,ORF7a:A55-,ORF7a:L56-,ORF7a:T57-,ORF7a:C58-,ORF7a:F59-,ORF7a:S60-,ORF7a:T61-,ORF7a:Q62-,ORF8:D119-,ORF8:F120-,S:E156-,S:F157-				C2716T,G7936T,G16377T,C18252T,C29675T	0	0	5	5	19298-19551	ORF1b:1944-2028		3000	0	good	254	10	0
hCoV-19/USA/WI-MHDL-2021120096/2021|EPI_ISL_7809452|2021-11-08	hCoV-19/USA/WI-MHDL-2021120096/2021	EPI_ISL_7809452	2021-11-08	21J	AY.103	B.1.617.2.103	21J	Delta	21J (Delta)	0	good	41	13	0	0	264	0	32	4	0	89	89233	38	29856	0.988362	false	G210T,C241T,C829T,A1146C,C3037T,G4181T,C6402T,A6907C,C7124T,C8986T,G9053T,C10029T,A11201G,A11332G,C14408T,G15451A,C16466T,A17236G,A18360G,C19220T,C21618G,G21987A,T22917G,C22995A,A23403G,C23604G,C24208T,G24410A,C25469T,C25702T,T26767C,T27638C,C27752T,C27874T,A28461G,C28606T,G28881T,G28895T,G28916T,G29402T,G29742T	22029-22034,28248-28253,28271			M:I82T,N:D63G,N:R203M,N:A208S,N:G215C,N:D377Y,ORF1a:D294A,ORF1a:A1306S,ORF1a:P2046L,ORF1a:P2287S,ORF1a:V2930L,ORF1a:T3255I,ORF1a:T3646A,ORF1b:P314L,ORF1b:G662S,ORF1b:P1000L,ORF1b:I1257V,ORF1b:A1918V,ORF3a:S26L,ORF3a:P104S,ORF7a:V82A,ORF7a:T120I,ORF7b:T40I,ORF9b:T60A,S:T19R,S:G142D,S:R158G,S:L452R,S:T478K,S:D614G,S:P681R,S:D950N	ORF8:D119-,ORF8:F120-,S:E156-,S:F157-				C829T,A1146C,A6907C,A18360G,C25702T,C28606T,G28895T	0	0	7	7	19293-19556	ORF1b:1942-2030		3000	0	good	264	10	0
hCoV-19/USA/WI-MHDL-2021120097/2021|EPI_ISL_7809453|2021-11-08	hCoV-19/USA/WI-MHDL-2021120097/2021	EPI_ISL_7809453	2021-11-08	21J	AY.103	B.1.617.2.103	21J	Delta	21J (Delta)	8.50694	good	43	13	0	0	254	0	33	4	0	85	89216	39	29854	0.988596	false	G210T,C241T,C1684T,C3037T,G4181T,C6402T,C7124T,C8386T,A8520C,C8986T,G9053T,C10029T,A11201G,A11332G,C11572T,C12915T,C14408T,A14513C,G15451A,C16466T,A17236G,C19220T,C21618G,G21987A,T22917G,C22995A,A23403G,C23604G,C24208T,G24410A,C25469T,T26767C,T27291C,C27625T,T27638C,C27752T,C27874T,A28461G,G28881T,G28916T,G29402T,G29742T,C29774T	22029-22034,28248-28253,28271			M:I82T,N:D63G,N:R203M,N:G215C,N:D377Y,ORF1a:A1306S,ORF1a:P2046L,ORF1a:P2287S,ORF1a:N2752T,ORF1a:V2930L,ORF1a:T3255I,ORF1a:T3646A,ORF1a:T4217I,ORF1b:P314L,ORF1b:D349A,ORF1b:G662S,ORF1b:P1000L,ORF1b:I1257V,ORF1b:A1918V,ORF3a:S26L,ORF7a:R78C,ORF7a:V82A,ORF7a:T120I,ORF7b:T40I,ORF9b:T60A,S:T19R,S:G142D,S:R158G,S:L452R,S:T478K,S:D614G,S:P681R,S:D950N	ORF8:D119-,ORF8:F120-,S:E156-,S:F157-			C1684T|21I,T27291C|21J	C8386T,A8520C,C11572T,C12915T,A14513C,C27625T,C29774T	0	2	7	9	19298-19551	ORF1b:1944-2028		3000	0	good	254	10	0
hCoV-19/USA/WI-MHDL-2021120098/2021|EPI_ISL_7809454|2021-11-08	hCoV-19/USA/WI-MHDL-2021120098/2021	EPI_ISL_7809454	2021-11-08	21J	AY.25	B.1.617.2.25	21J	Delta	21J (Delta)	100	bad	43	13	0	0	231	0	30	4	0	78	89216	39	29854	0.989366	false	G210T,C222T,C241T,C1108T,C3037T,G4181T,C4320T,C6402T,C7124T,C8986T,G9053T,C10029T,A11201G,A11332G,C11626T,G12801A,C13384T,C14408T,G15451A,C16466T,C19220T,C21618G,G22801T,T22917G,C22995A,A23403G,C23604G,G24410A,C25469T,A25934T,G26107C,T26767C,C26894A,C27498T,A27507C,T27638C,C27874T,A28461G,G28881T,G28916T,C29167T,G29402T,G29742T	22029-22034,28248-28253,28271			M:I82T,N:D63G,N:R203M,N:G215C,N:D377Y,ORF1a:A1306S,ORF1a:A1352V,ORF1a:P2046L,ORF1a:P2287S,ORF1a:V2930L,ORF1a:T3255I,ORF1a:T3646A,ORF1a:R4179K,ORF1b:P314L,ORF1b:G662S,ORF1b:P1000L,ORF1b:A1918V,ORF3a:S26L,ORF3a:E181V,ORF3a:E239Q,ORF7a:V82A,ORF7b:T40I,ORF9b:T60A,S:T19R,S:R158G,S:L452R,S:T478K,S:D614G,S:P681R,S:D950N	ORF8:D119-,ORF8:F120-,S:E156-,S:F157-		A21987G,T27752C	C222T|20E,G12801A|21J,G22801T|21J	C1108T,C4320T,C11626T,C13384T,A25934T,C26894A,C27498T,C29167T	2	3	8	13	19298-19303,19327-19551	ORF1b:1944-1946,ORF1b:1954-2028		3000	0	good	231	10	0
hCoV-19/USA/WI-MHDL-2021120100/2021|EPI_ISL_7809455|2021-11-08	hCoV-19/USA/WI-MHDL-2021120100/2021	EPI_ISL_7809455	2021-11-08	21J	AY.103	B.1.617.2.103	21J	Delta	21J (Delta)	0	good	36	13	0	0	19	0	29	4	0	7	89268	31	29854	0.996723	false	G210T,C241T,C3037T,G4181T,C6402T,G6421T,C7124T,C8986T,G9053T,C10029T,A11201G,A11332G,C14408T,G15451A,C16466T,A17236G,C19220T,C21618G,G21987A,T22917G,C22995A,A23403G,C23604G,C24208T,G24410A,C25469T,T26767C,T27291C,T27638C,C27752T,C27874T,A28461G,G28881T,G28916T,G29402T,G29742T	22029-22034,28248-28253,28271			M:I82T,N:D63G,N:R203M,N:G215C,N:D377Y,ORF1a:A1306S,ORF1a:P2046L,ORF1a:P2287S,ORF1a:V2930L,ORF1a:T3255I,ORF1a:T3646A,ORF1b:P314L,ORF1b:G662S,ORF1b:P1000L,ORF1b:I1257V,ORF1b:A1918V,ORF3a:S26L,ORF7a:V82A,ORF7a:T120I,ORF7b:T40I,ORF9b:T60A,S:T19R,S:G142D,S:R158G,S:L452R,S:T478K,S:D614G,S:P681R,S:D950N	ORF8:D119-,ORF8:F120-,S:E156-,S:F157-			T27291C|21J	G6421T	0	1	1	2	19528-19546	ORF1b:2021-2027		3000	0	good	19	10	0
hCoV-19/USA/WI-MHDL-2021120101/2021|EPI_ISL_7809456|2021-11-08	hCoV-19/USA/WI-MHDL-2021120101/2021	EPI_ISL_7809456	2021-11-08	21J	AY.103	B.1.617.2.103	21J	Delta	21J (Delta)	29.3403	good	49	13	0	0	268	0	37	4	0	90	89213	31	29853	0.988362	false	G210T,C241T,C745T,T2320C,C3037T,A4000C,G4181T,G6169T,C6402T,C7124T,C8986T,G9053T,C10029T,A11201G,A11332G,C14408T,G15451A,C16323T,C16466T,G16588T,A17236G,G18756T,C19220T,C21618G,G21987A,T22917G,C22995A,C23117T,A23403G,C23604G,C24208T,G24410A,G24497T,G24620T,C25466T,C25469T,C25549T,C25692T,T26767C,T27291C,C27625T,T27638C,C27752T,C27874T,A28461G,G28881T,G28916T,G29402T,G29742T	22029-22034,28248-28253,28271			M:I82T,N:D63G,N:R203M,N:G215C,N:D377Y,ORF1a:E1245D,ORF1a:A1306S,ORF1a:P2046L,ORF1a:P2287S,ORF1a:V2930L,ORF1a:T3255I,ORF1a:T3646A,ORF1b:P314L,ORF1b:G662S,ORF1b:P1000L,ORF1b:G1041C,ORF1b:I1257V,ORF1b:A1918V,ORF3a:P25L,ORF3a:S26L,ORF3a:L53F,ORF7a:R78C,ORF7a:V82A,ORF7a:T120I,ORF7b:T40I,ORF9b:T60A,S:T19R,S:G142D,S:R158G,S:L452R,S:T478K,S:H519Y,S:D614G,S:P681R,S:D950N,S:D979Y,S:A1020S	ORF8:D119-,ORF8:F120-,S:E156-,S:F157-			G24620T|22B,T27291C|21J	C745T,T2320C,A4000C,G6169T,C16323T,G16588T,G18756T,C23117T,G24497T,C25466T,C25549T,C25692T,C27625T	0	2	13	15	19291-19558	ORF1b:1942-2031		3000	0	good	268	10	0
hCoV-19/USA/WI-MHDL-2021120102/2021|EPI_ISL_7809457|2021-11-08	hCoV-19/USA/WI-MHDL-2021120102/2021	EPI_ISL_7809457	2021-11-08	21J	AY.103	B.1.617.2.103	21J	Delta	21J (Delta)	62.6736	mediocre	48	13	0	0	258	0	36	4	0	86	89193	39	29853	0.988429	false	G210T,C241T,C745T,T2320C,C3037T,A4000C,G4181T,G6169T,C6402T,C8986T,G9053T,C10029T,A11201G,A11332G,C14408T,G15451A,C16323T,C16466T,G16588T,A17236G,G18756T,C19220T,C21618G,G21987A,T22917G,C22995A,C23117T,A23403G,C23604G,C24208T,G24410A,G24497T,G24620T,C25466T,C25469T,C25549T,C25692T,T26767C,T27291C,C27625T,T27638C,C27752T,C27874T,A28461G,G28881T,G28916T,G29402T,G29742T	22029-22034,28248-28253,28271			M:I82T,N:D63G,N:R203M,N:G215C,N:D377Y,ORF1a:E1245D,ORF1a:A1306S,ORF1a:P2046L,ORF1a:V2930L,ORF1a:T3255I,ORF1a:T3646A,ORF1b:P314L,ORF1b:G662S,ORF1b:P1000L,ORF1b:G1041C,ORF1b:I1257V,ORF1b:A1918V,ORF3a:P25L,ORF3a:S26L,ORF3a:L53F,ORF7a:R78C,ORF7a:V82A,ORF7a:T120I,ORF7b:T40I,ORF9b:T60A,S:T19R,S:G142D,S:R158G,S:L452R,S:T478K,S:H519Y,S:D614G,S:P681R,S:D950N,S:D979Y,S:A1020S	ORF8:D119-,ORF8:F120-,S:E156-,S:F157-		T7124C	G24620T|22B,T27291C|21J	C745T,T2320C,A4000C,G6169T,C16323T,G16588T,G18756T,C23117T,G24497T,C25466T,C25549T,C25692T,C27625T	1	2	13	16	19294-19551	ORF1b:1943-2028		3000	0	good	258	10	0
hCoV-19/USA/WI-MHDL-2021120103/2021|EPI_ISL_7809458|2021-11-08	hCoV-19/USA/WI-MHDL-2021120103/2021	EPI_ISL_7809458	2021-11-08	21J	AY.103	B.1.617.2.103	21J	Delta	21J (Delta)	6.25	good	38	13	0	0	263	0	29	4	0	88	89242	39	29856	0.988362	false	G210T,C241T,C3037T,G4181T,C6402T,G6421T,C7124T,C7420T,C8986T,G9053T,C10029T,A11201G,A11332G,C14408T,G15451A,C16466T,A17236G,A18840G,C19145T,C19220T,C21618G,T22917G,C22995A,A23403G,C23604G,C24208T,G24410A,C25469T,T26767C,T27291C,T27638C,C27752T,C27874T,A28461G,G28881T,G28916T,G29402T,G29742T	22029-22034,28248-28253,28271			M:I82T,N:D63G,N:R203M,N:G215C,N:D377Y,ORF1a:A1306S,ORF1a:P2046L,ORF1a:P2287S,ORF1a:V2930L,ORF1a:T3255I,ORF1a:T3646A,ORF1b:P314L,ORF1b:G662S,ORF1b:P1000L,ORF1b:I1257V,ORF1b:S1893F,ORF1b:A1918V,ORF3a:S26L,ORF7a:V82A,ORF7a:T120I,ORF7b:T40I,ORF9b:T60A,S:T19R,S:R158G,S:L452R,S:T478K,S:D614G,S:P681R,S:D950N	ORF8:D119-,ORF8:F120-,S:E156-,S:F157-		A21987G	T27291C|21J	G6421T,C7420T,A18840G,C19145T	1	1	4	6	19291-19553	ORF1b:1942-2029		3000	0	good	263	10	0
hCoV-19/USA/WI-MHDL-2021120104/2021|EPI_ISL_7809459|2021-11-08	hCoV-19/USA/WI-MHDL-2021120104/2021	EPI_ISL_7809459	2021-11-08	21J	AY.103	B.1.617.2.103	21J	Delta	21J (Delta)	0.173611	good	40	13	0	0	261	0	31	4	0	88	89270	31	29860	0.988831	false	G210T,C241T,C3037T,G4181T,A6248C,C6402T,G6421T,C7124T,C7420T,C8986T,G9053T,C10029T,A11201G,A11332G,C14408T,G15451A,C16466T,A17236G,A18840G,C19145T,C19220T,C21618G,G21987A,T22917G,C22995A,A23403G,C23604G,C24208T,G24410A,C25469T,T26767C,T27291C,T27638C,C27752T,C27874T,A28461G,G28881T,G28916T,G29402T,G29742T	22029-22034,28248-28253,28271			M:I82T,N:D63G,N:R203M,N:G215C,N:D377Y,ORF1a:A1306S,ORF1a:N1995H,ORF1a:P2046L,ORF1a:P2287S,ORF1a:V2930L,ORF1a:T3255I,ORF1a:T3646A,ORF1b:P314L,ORF1b:G662S,ORF1b:P1000L,ORF1b:I1257V,ORF1b:S1893F,ORF1b:A1918V,ORF3a:S26L,ORF7a:V82A,ORF7a:T120I,ORF7b:T40I,ORF9b:T60A,S:T19R,S:G142D,S:R158G,S:L452R,S:T478K,S:D614G,S:P681R,S:D950N	ORF8:D119-,ORF8:F120-,S:E156-,S:F157-			T27291C|21J	A6248C,G6421T,C7420T,A18840G,C19145T	0	1	5	6	19293-19553	ORF1b:1942-2029		3000	0	good	261	10	0
hCoV-19/USA/WI-MHDL-2021120105/2021|EPI_ISL_7809460|2021-11-08	hCoV-19/USA/WI-MHDL-2021120105/2021	EPI_ISL_7809460	2021-11-08	21J	AY.103	B.1.617.2.103	21J	Delta	21J (Delta)	0	good	37	13	0	0	268	0	29	4	0	90	89264	31	29854	0.988396	false	G210T,C241T,C3037T,G4181T,C6402T,G6421T,C7124T,C7420T,C8986T,G9053T,C10029T,A11201G,A11332G,C14408T,G15451A,C16466T,A17236G,C19220T,C21618G,G21987A,T22917G,C22995A,A23403G,C23604G,C24208T,G24410A,C25469T,T26767C,T27291C,T27638C,C27752T,C27874T,A28461G,G28881T,G28916T,G29402T,G29742T	22029-22034,28248-28253,28271			M:I82T,N:D63G,N:R203M,N:G215C,N:D377Y,ORF1a:A1306S,ORF1a:P2046L,ORF1a:P2287S,ORF1a:V2930L,ORF1a:T3255I,ORF1a:T3646A,ORF1b:P314L,ORF1b:G662S,ORF1b:P1000L,ORF1b:I1257V,ORF1b:A1918V,ORF3a:S26L,ORF7a:V82A,ORF7a:T120I,ORF7b:T40I,ORF9b:T60A,S:T19R,S:G142D,S:R158G,S:L452R,S:T478K,S:D614G,S:P681R,S:D950N	ORF8:D119-,ORF8:F120-,S:E156-,S:F157-			T27291C|21J	G6421T,C7420T	0	1	2	3	19291-19558	ORF1b:1942-2031		3000	0	good	268	10	0
hCoV-19/USA/WI-MHDL-2021120106/2021|EPI_ISL_7809461|2021-11-08	hCoV-19/USA/WI-MHDL-2021120106/2021	EPI_ISL_7809461	2021-11-08	21J	AY.103	B.1.617.2.103	21J	Delta	21J (Delta)	4.34028	good	37	13	0	0	261	0	29	4	0	87	89267	31	29855	0.988663	false	G210T,C241T,C3037T,G4181T,C6402T,G6421T,C7124T,C7420T,C8986T,G9053T,C10029T,A11201G,A11332G,C14408T,G15451A,C16466T,A17236G,C19145T,C19220T,C21618G,T22917G,C22995A,A23403G,C23604G,C24208T,G24410A,C25469T,T26767C,T27291C,T27638C,C27752T,C27874T,A28461G,G28881T,G28916T,G29402T,G29742T	22029-22034,28248-28253,28271			M:I82T,N:D63G,N:R203M,N:G215C,N:D377Y,ORF1a:A1306S,ORF1a:P2046L,ORF1a:P2287S,ORF1a:V2930L,ORF1a:T3255I,ORF1a:T3646A,ORF1b:P314L,ORF1b:G662S,ORF1b:P1000L,ORF1b:I1257V,ORF1b:S1893F,ORF1b:A1918V,ORF3a:S26L,ORF7a:V82A,ORF7a:T120I,ORF7b:T40I,ORF9b:T60A,S:T19R,S:R158G,S:L452R,S:T478K,S:D614G,S:P681R,S:D950N	ORF8:D119-,ORF8:F120-,S:E156-,S:F157-		A21987G	T27291C|21J	G6421T,C7420T,C19145T	1	1	3	5	19291-19551	ORF1b:1942-2028		3000	0	good	261	10	0
hCoV-19/USA/WI-MHDL-2021120107/2021|EPI_ISL_7829228|2021-11-08	hCoV-19/USA/WI-MHDL-2021120107/2021	EPI_ISL_7829228	2021-11-08	21J	AY.3	B.1.617.2.3	21J	Delta	21J (Delta)	26.2058	good	43	7	1	1	1349	0	30	0	0	473	88452	50	29604	0.94325	false	G210T,C241T,C1909A,C3037T,C3165T,G4181T,C4901T,C6402T,C7124T,G7641T,C8986T,G9053T,C10029T,A11201G,A11332G,A11456G,C14408T,G15451A,C16466T,C17012T,A18102G,C19220T,C19973A,C21618G,T22917G,C22995A,C23114T,T23284C,A23403G,C23604G,G24410A,T24541C,C25339T,C25469T,T26767C,C26882T,C27874T,A28461G,G28881T,G28916T,G29050A,G29402T,C29509T	28248-28253,28271	28214:T	ORF8:108-122	M:I82T,N:D63G,N:R203M,N:G215C,N:D377Y,ORF1a:F548L,ORF1a:A967V,ORF1a:A1306S,ORF1a:P2046L,ORF1a:P2287S,ORF1a:C2459F,ORF1a:V2930L,ORF1a:T3255I,ORF1a:T3646A,ORF1a:I3731V,ORF1b:P314L,ORF1b:G662S,ORF1b:P1000L,ORF1b:S1182L,ORF1b:A1918V,ORF1b:P2169Q,ORF3a:S26L,ORF7b:T40I,ORF9b:T60A,S:T19R,S:L452R,S:T478K,S:D614G,S:P681R,S:D950N			A21987G		C1909A,C3165T,C4901T,G7641T,C17012T,A18102G,C19973A,C23114T,T24541C,C26882T	1	0	10	11	3200-3516,7687-7712,19286-19570,21154-21386,21717-21852,21891-21892,21919-21940,22029-22034,22266-22290,22335-22342,27520-27808	ORF1a:979-1084,ORF1a:2474-2483,ORF1b:1940-2035,ORF1b:2563-2640,ORF7a:43-122,ORF7b:1-18,ORF8:108-122,S:52-97,S:110,S:119-126,S:156-158,S:235-243,S:258-260		3000	38.8519	mediocre	1349	10	0
hCoV-19/USA/WI-MHDL-2021120108/2021|EPI_ISL_7809462|2021-11-08	hCoV-19/USA/WI-MHDL-2021120108/2021	EPI_ISL_7809462	2021-11-08	21J	AY.103	B.1.617.2.103	21J	Delta	21J (Delta)	8.50694	good	39	13	0	0	154	0	29	4	0	53	89229	39	29853	0.991907	false	G210T,C241T,C3037T,G4181T,C6402T,C7124T,C8386T,C8986T,G9053T,C10029T,A11201G,A11332G,C11572T,C14408T,G15451A,C16466T,A17236G,C19220T,C21618G,T22917G,C22995A,A23403G,C23604G,T23659C,C24208T,G24410A,C25469T,T26767C,G27014T,T27291C,T27638C,C27752T,C27874T,C27982G,A28461G,G28881T,G28916T,G29402T,G29742T	22029-22034,28248-28253,28271			M:I82T,N:D63G,N:R203M,N:G215C,N:D377Y,ORF1a:A1306S,ORF1a:P2046L,ORF1a:P2287S,ORF1a:V2930L,ORF1a:T3255I,ORF1a:T3646A,ORF1b:P314L,ORF1b:G662S,ORF1b:P1000L,ORF1b:I1257V,ORF1b:A1918V,ORF3a:S26L,ORF7a:V82A,ORF7a:T120I,ORF7b:T40I,ORF8:P30R,ORF9b:T60A,S:T19R,S:R158G,S:L452R,S:T478K,S:D614G,S:P681R,S:D950N	ORF8:D119-,ORF8:F120-,S:E156-,S:F157-		A21987G	T27291C|21J	C8386T,C11572T,T23659C,G27014T,C27982G	1	1	5	7	19293,19298-19316,19420-19553	ORF1b:1942,ORF1b:1944-1950,ORF1b:1985-2029		3000	0	good	154	10	0
hCoV-19/USA/WI-MHDL-2021120109/2021|EPI_ISL_7809463|2021-11-08	hCoV-19/USA/WI-MHDL-2021120109/2021	EPI_ISL_7809463	2021-11-08	21J	AY.4	B.1.617.2.4	21J	Delta	21J (Delta)	56.2608	mediocre	39	13	0	0	328	0	33	4	0	112	89223	39	29851	0.986021	false	T175C,G210T,C241T,C1077T,C3037T,G4181T,C6402T,C7124T,C7851T,C8986T,G9053T,C9246T,C10029T,A11201G,A11332G,G11851C,C14408T,G15451A,T15669A,C16466T,C19220T,C21618G,C21846T,T22917G,C22995A,A23403G,C23604G,G24410A,C25469T,G25537T,G26049T,C26228T,T26767C,C27874T,A28461G,G28881T,G28916T,G29402T,G29742T	22029-22034,28248-28253,28271			M:I82T,N:D63G,N:R203M,N:G215C,N:D377Y,ORF1a:P271L,ORF1a:A1306S,ORF1a:P2046L,ORF1a:P2287S,ORF1a:A2529V,ORF1a:V2930L,ORF1a:A2994V,ORF1a:T3255I,ORF1a:T3646A,ORF1a:M3862I,ORF1b:P314L,ORF1b:G662S,ORF1b:N734K,ORF1b:P1000L,ORF1b:A1918V,ORF3a:S26L,ORF3a:G49C,ORF3a:L219F,ORF7b:T40I,ORF9b:T60A,S:T19R,S:T95I,S:R158G,S:L452R,S:T478K,S:D614G,S:P681R,S:D950N	ORF8:D119-,ORF8:F120-,S:E156-,S:F157-		A21987G,C27638T,T27752C		T175C,C1077T,C9246T,G11851C,T15669A,G25537T,G26049T,C26228T	3	0	8	11	19293-19557,27533-27561,27757-27790	ORF1b:1942-2030,ORF7a:47-56,ORF7a:122,ORF7b:1-12		3000	1.03704	good	328	10	0
hCoV-19/USA/WI-MHDL-2021120110/2021|EPI_ISL_7809464|2021-11-08	hCoV-19/USA/WI-MHDL-2021120110/2021	EPI_ISL_7809464	2021-11-08	21J	AY.25	B.1.617.2.25	21J	Delta	21J (Delta)	34.3531	mediocre	38	13	0	0	454	0	28	4	0	154	89233	39	29853	0.981875	false	G210T,C241T,C3037T,G4181T,C6402T,C7124T,C8986T,G9053T,C10029T,A10552G,A11201G,A11332G,C14408T,A14841G,G15451A,C16466T,C19032T,C19220T,C21618G,C21897T,A22666G,T22917G,C22995A,A23083C,A23403G,C23604G,C23897A,G24410A,C25469T,G26107C,T26767C,A27507C,C27874T,A28461G,G28881T,G28916T,G29402T,G29742T	22029-22034,28248-28253,28271			M:I82T,N:D63G,N:R203M,N:G215C,N:D377Y,ORF1a:A1306S,ORF1a:P2046L,ORF1a:P2287S,ORF1a:V2930L,ORF1a:T3255I,ORF1a:T3646A,ORF1b:P314L,ORF1b:G662S,ORF1b:P1000L,ORF1b:A1918V,ORF3a:S26L,ORF3a:E239Q,ORF7b:T40I,ORF9b:T60A,S:T19R,S:S112L,S:R158G,S:L452R,S:T478K,S:D614G,S:P681R,S:Q779K,S:D950N	ORF8:D119-,ORF8:F120-,S:E156-,S:F157-		A21987G,T27752C	C21897T|21J	A10552G,A14841G,C19032T,A22666G,A23083C,C23897A	2	1	6	9	19298-19556,27528-27718,27788-27791	ORF1b:1944-2030,ORF7a:45-109,ORF7b:11-12		3000	5.7037	good	454	10	0
hCoV-19/USA/WI-MHDL-2021120111/2021|EPI_ISL_7809465|2021-11-08	hCoV-19/USA/WI-MHDL-2021120111/2021	EPI_ISL_7809465	2021-11-08	21J	AY.100	B.1.617.2.100	21J	Delta	21J (Delta)	22.7749	good	44	13	0	0	659	0	32	4	0	225	89206	39	29852	0.974986	false	G210T,C241T,A532T,C2508T,C3037T,G4181T,C5812T,C6402T,C7124T,C8986T,G9053T,C9133A,C9559T,C10029T,A11201G,A11332G,T12883C,C13329T,C14408T,C15240T,G15451A,C16466T,G17122T,G17427T,C19220T,C21618G,C21806A,C21846T,T22917G,C22995A,A23403G,C23604G,G24410A,C25469T,T26767C,C27874T,A27985T,T28007C,C28432T,A28461G,G28881T,G28916T,G29402T,G29742T	22029-22034,28248-28253,28271			M:I82T,N:D63G,N:R203M,N:G215C,N:D377Y,ORF1a:P748L,ORF1a:A1306S,ORF1a:P2046L,ORF1a:P2287S,ORF1a:V2930L,ORF1a:T3255I,ORF1a:T3646A,ORF1a:T4355I,ORF1b:P314L,ORF1b:G662S,ORF1b:P1000L,ORF1b:A1219S,ORF1b:A1918V,ORF3a:S26L,ORF7b:T40I,ORF8:Y31F,ORF9b:S50L,ORF9b:T60A,S:T19R,S:P82T,S:T95I,S:R158G,S:L452R,S:T478K,S:D614G,S:P681R,S:D950N	ORF8:D119-,ORF8:F120-,S:E156-,S:F157-		A21987G	C28432T|21J	A532T,C2508T,C5812T,C9133A,T12883C,C13329T,G17427T,C21806A,A27985T	1	1	9	11	19291-19557,21231-21283,21285-21287,21289-21311,21319-21364,21966-21968,27528-27791	ORF1b:1942-2030,ORF1b:2588-2615,ORF1b:2618-2633,ORF7a:45-122,ORF7b:1-12,S:135-136		3000	13.2963	good	659	10	0
hCoV-19/USA/WI-MHDL-2021120112/2021|EPI_ISL_7809466|2021-11-08	hCoV-19/USA/WI-MHDL-2021120112/2021	EPI_ISL_7809466	2021-11-08	21J	AY.103	B.1.617.2.103	21J	Delta	21J (Delta)	2.77778	good	39	13	0	0	266	0	30	4	0	89	89229	39	29853	0.988162	false	G210T,C241T,G1721T,C3037T,G4181T,C6402T,C7124T,C8986T,G9053T,C10029T,A11201G,A11332G,A12466G,C13774T,C14408T,G15451A,C16466T,A17236G,C18486T,C19220T,T20007C,C21618G,T22917G,C22995A,A23403G,C23604G,C24208T,G24410A,C25469T,T26767C,T27638C,C27752T,C27874T,A28461G,G28881T,G28916T,G29402T,C29733T,G29742T	22029-22034,28248-28253,28271			M:I82T,N:D63G,N:R203M,N:G215C,N:D377Y,ORF1a:A486S,ORF1a:A1306S,ORF1a:P2046L,ORF1a:P2287S,ORF1a:V2930L,ORF1a:T3255I,ORF1a:T3646A,ORF1b:P103S,ORF1b:P314L,ORF1b:G662S,ORF1b:P1000L,ORF1b:I1257V,ORF1b:A1918V,ORF3a:S26L,ORF7a:V82A,ORF7a:T120I,ORF7b:T40I,ORF9b:T60A,S:T19R,S:R158G,S:L452R,S:T478K,S:D614G,S:P681R,S:D950N	ORF8:D119-,ORF8:F120-,S:E156-,S:F157-		A21987G		G1721T,A12466G,C13774T,C18486T,T20007C,C29733T	1	0	6	7	19291-19556	ORF1b:1942-2030		3000	0	good	266	10	0
hCoV-19/USA/WI-MHDL-2021120113/2021|EPI_ISL_7809467|2021-11-08	hCoV-19/USA/WI-MHDL-2021120113/2021	EPI_ISL_7809467	2021-11-08	21J	AY.25	B.1.617.2.25	21J	Delta	21J (Delta)	9.92188	good	37	13	0	0	1143	0	28	4	0	397	89207	39	29843	0.958499	false	G210T,C241T,C2395T,C3037T,G4181T,T4735C,C6402T,C7124T,C8986T,G9053T,C10029T,A11201G,A11332G,A13869G,C14408T,G15451A,C16466T,C17550T,C19220T,C21618G,T22917G,C22995A,C23127T,A23403G,C23604G,G24410A,C25469T,G26107C,T26767C,A27262G,A27507C,C27874T,A28461G,G28881T,G28916T,G29402T,G29742T	22029-22034,28248-28253,28271			M:I82T,N:D63G,N:R203M,N:G215C,N:D377Y,ORF1a:A1306S,ORF1a:P2046L,ORF1a:P2287S,ORF1a:V2930L,ORF1a:T3255I,ORF1a:T3646A,ORF1b:P314L,ORF1b:G662S,ORF1b:P1000L,ORF1b:A1918V,ORF3a:S26L,ORF3a:E239Q,ORF6:T21A,ORF7b:T40I,ORF9b:T60A,S:T19R,S:R158G,S:L452R,S:T478K,S:A522V,S:D614G,S:P681R,S:D950N	ORF8:D119-,ORF8:F120-,S:E156-,S:F157-			C2395T|21C	T4735C,A13869G,C17550T,C23127T,A27262G	0	1	5	6	2602-2603,2615-2624,2754-2834,3767-3778,6984-6991,6993-7004,7018-7035,7040-7042,19298-19312,19330-19358,19375-19548,20085-20087,20303-20304,20346-20381,20437-20445,20460-20472,21162-21386,21739-21782,21796-21818,21831-21990,27528-27791	ORF1a:779-780,ORF1a:784-787,ORF1a:830-857,ORF1a:1168-1171,ORF1a:2240-2247,ORF1a:2251-2257,ORF1a:2259,ORF1b:1944-1949,ORF1b:1955-1964,ORF1b:1970-2027,ORF1b:2206-2207,ORF1b:2279,ORF1b:2293-2305,ORF1b:2324-2326,ORF1b:2331-2335,ORF1b:2565-2640,ORF7a:45-122,ORF7b:1-12,S:59-74,S:78-86,S:90-143		3000	31.2222	mediocre	1143	10	0
hCoV-19/USA/WI-MHDL-2021120114/2021|EPI_ISL_7809468|2021-11-08	hCoV-19/USA/WI-MHDL-2021120114/2021	EPI_ISL_7809468	2021-11-08	21I	AY.47	B.1.617.2.47	21I	Delta	21I (Delta)	14.6334	good	35	13	0	0	504	0	27	4	0	176	89245	39	29853	0.980203	false	G210T,C241T,C1684T,C3037T,G4309T,G5164T,C5184T,A5584G,G8602T,C9891T,T11418C,C11514T,T11617C,C12049T,C13019T,C14408T,G15451A,C16466T,C21618G,C22227T,G22427A,T22917G,C22995A,A23403G,C23604G,G24410A,C25469T,T26767C,G28326T,A28461G,G28881T,C28890T,C29167T,G29402T,G29742T	22029-22034,28248-28253,28271			M:I82T,N:G18V,N:D63G,N:R203M,N:S206F,N:D377Y,ORF1a:K1348N,ORF1a:E1633D,ORF1a:P1640L,ORF1a:A3209V,ORF1a:V3718A,ORF1a:T3750I,ORF1b:P314L,ORF1b:G662S,ORF1b:P1000L,ORF3a:S26L,ORF9b:V15L,ORF9b:T60A,S:T19R,S:R158G,S:A222V,S:V289I,S:L452R,S:T478K,S:D614G,S:P681R,S:D950N	ORF8:D119-,ORF8:F120-,S:E156-,S:F157-		A21987G,T27752C		G4309T,G8602T,T11617C,C28890T,C29167T	2	0	5	7	19298-19303,19329-19401,19412-19553,21773-21821,21836-21852,27528-27692,27708-27709,27725-27744,27757-27784,27789-27790	ORF1b:1944-1946,ORF1b:1954-1978,ORF1b:1982-2029,ORF7a:45-100,ORF7a:105-106,ORF7a:111-117,ORF7a:122,ORF7b:1-10,ORF7b:12,S:71-87,S:92-97		3000	7.55556	good	504	10	0
hCoV-19/USA/WI-MHDL-2021120115/2021|EPI_ISL_7809469|2021-11-08	hCoV-19/USA/WI-MHDL-2021120115/2021	EPI_ISL_7809469	2021-11-08	21I	AY.47	B.1.617.2.47	21I	Delta	21I (Delta)	2.77778	good	38	13	0	0	265	0	29	4	0	89	89236	39	29854	0.988229	false	G210T,C241T,C1684T,C3037T,G4309T,G5164T,C5184T,A5584G,G8602T,C9891T,T11418C,C11514T,T11617C,C12049T,C13019T,C14408T,G15451A,C16466T,C21618G,C22227T,G22427A,T22917G,C22995A,A23403G,C23604G,G24410A,C25469T,T26767C,T27638C,C27741T,C27752T,G28326T,A28461G,G28881T,C28890T,C29167T,G29402T,G29742T	22029-22034,28248-28253,28271			M:I82T,N:G18V,N:D63G,N:R203M,N:S206F,N:D377Y,ORF1a:K1348N,ORF1a:E1633D,ORF1a:P1640L,ORF1a:A3209V,ORF1a:V3718A,ORF1a:T3750I,ORF1b:P314L,ORF1b:G662S,ORF1b:P1000L,ORF3a:S26L,ORF7a:V82A,ORF7a:T120I,ORF9b:V15L,ORF9b:T60A,S:T19R,S:R158G,S:A222V,S:V289I,S:L452R,S:T478K,S:D614G,S:P681R,S:D950N	ORF8:D119-,ORF8:F120-,S:E156-,S:F157-		A21987G		G4309T,G8602T,T11617C,C27741T,C28890T,C29167T	1	0	6	7	19293-19557	ORF1b:1942-2030		3000	0	good	265	10	0
hCoV-19/USA/WI-MHDL-2021120277/2021|EPI_ISL_7828341|2021-11-08	hCoV-19/USA/WI-MHDL-2021120277/2021	EPI_ISL_7828341	2021-11-08	21J	AY.25	B.1.617.2.25	21J	Delta	21J (Delta)	0.694444	good	41	13	0	0	267	0	33	4	0	89	89251	31	29855	0.988463	false	G210T,C241T,C683T,C3037T,G3871T,G4181T,C6402T,C7124T,C8986T,G9053T,C10029T,C10340T,A11201G,A11332G,C13551T,C14408T,T15056C,G15451A,C16466T,C19220T,C21618G,C21897T,G21987A,T22917G,C22995A,A23403G,C23604G,G24410A,C25469T,G26107C,T26767C,A27507C,T27638C,C27752T,C27874T,A28461G,T28735C,G28881T,G28916T,G29402T,G29742T	22029-22034,28248-28253,28271			M:I82T,N:D63G,N:R203M,N:G215C,N:D377Y,ORF1a:K1202N,ORF1a:A1306S,ORF1a:P2046L,ORF1a:P2287S,ORF1a:V2930L,ORF1a:T3255I,ORF1a:P3359S,ORF1a:T3646A,ORF1b:P314L,ORF1b:I530T,ORF1b:G662S,ORF1b:P1000L,ORF1b:A1918V,ORF3a:S26L,ORF3a:E239Q,ORF7a:V82A,ORF7a:T120I,ORF7b:T40I,ORF9b:T60A,S:T19R,S:S112L,S:G142D,S:R158G,S:L452R,S:T478K,S:D614G,S:P681R,S:D950N	ORF8:D119-,ORF8:F120-,S:E156-,S:F157-			C21897T|21J	C683T,G3871T,C10340T,C13551T,T15056C,T28735C	0	1	6	7	19291-19557	ORF1b:1942-2030		3000	0	good	267	10	0
hCoV-19/USA/WI-MHDL-2021120278/2021|EPI_ISL_7828342|2021-11-08	hCoV-19/USA/WI-MHDL-2021120278/2021	EPI_ISL_7828342	2021-11-08	21J	AY.103	B.1.617.2.103	21J	Delta	21J (Delta)	36.7198	mediocre	41	13	0	0	743	0	31	4	0	251	89245	31	29853	0.972478	false	G210T,C241T,A1515G,A2182G,C3037T,G4181T,A5073C,C6402T,C7124T,C7321T,C8986T,G9053T,C10029T,C11008T,A11201G,A11332G,C14408T,G15451A,C16466T,A17236G,C19220T,G19648T,G19999T,C21618G,T22917G,C22995A,A23403G,C23604G,C24208T,G24410A,C25469T,T25514G,T26767C,T27291C,C27874T,T28007C,A28461G,G28881T,G28916T,G29402T,G29742T	22029-22034,28248-28253,28271			M:I82T,N:D63G,N:R203M,N:G215C,N:D377Y,ORF1a:H417R,ORF1a:A1306S,ORF1a:D1603A,ORF1a:P2046L,ORF1a:P2287S,ORF1a:V2930L,ORF1a:T3255I,ORF1a:T3646A,ORF1b:P314L,ORF1b:G662S,ORF1b:P1000L,ORF1b:I1257V,ORF1b:A1918V,ORF1b:V2061L,ORF1b:V2178F,ORF3a:S26L,ORF3a:L41R,ORF7b:T40I,ORF9b:T60A,S:T19R,S:R158G,S:L452R,S:T478K,S:D614G,S:P681R,S:D950N	ORF8:D119-,ORF8:F120-,S:E156-,S:F157-		A21987G	T27291C|21J,T28007C|21J	A1515G,A2182G,A5073C,C7321T,C11008T,G19648T,G19999T,T25514G	1	2	8	11	7620-7626,19291-19558,21163-21366,27528-27791	ORF1a:2452-2454,ORF1b:1942-2031,ORF1b:2566-2633,ORF7a:45-122,ORF7b:1-12		3000	16.4074	good	743	10	0
hCoV-19/USA/WI-MHDL-2021120279/2021|EPI_ISL_7828343|2021-11-08	hCoV-19/USA/WI-MHDL-2021120279/2021	EPI_ISL_7828343	2021-11-08	21J	AY.44	B.1.617.2.44	21J	Delta	21J (Delta)	94.1982	mediocre	34	7	0	0	2717	0	27	2	0	919	89191	50	29836	0.90526	false	G210T,C241T,C3037T,G4181T,C6402T,C6638T,C7124T,C7926T,C8986T,G9053T,C10029T,A11201G,A11332G,T12045C,T14014G,C14408T,G15451A,C16466T,C19220T,C21618G,T22917G,C22995A,C23373T,A23403G,C23604G,G24410A,C25469T,T26767C,A28461G,G28881T,G28916T,G29593T,A29700G,G29742T	28248-28253,28271			M:I82T,N:D63G,N:R203M,N:G215C,ORF1a:A1306S,ORF1a:P2046L,ORF1a:H2125Y,ORF1a:P2287S,ORF1a:A2554V,ORF1a:V2930L,ORF1a:T3255I,ORF1a:T3646A,ORF1a:I3927T,ORF1b:F183V,ORF1b:P314L,ORF1b:G662S,ORF1b:P1000L,ORF1b:A1918V,ORF3a:S26L,ORF9b:T60A,S:T19R,S:L452R,S:T478K,S:T604I,S:D614G,S:P681R,S:D950N	ORF8:D119-,ORF8:F120-		T6040C	C6638T|21J,C7926T|21J&21K	T12045C,C23373T,G29593T	1	2	3	6	1568-1589,3511-3552,3738-3779,5260-5275,6148-6176,6993-7047,16746-16753,16758,19285-19585,19922-20480,21152-21386,21410-21429,21439-21443,21717-22320,22377-22421,26305-26327,27520-28089,29371-29510	E:21-28,N:366-413,ORF1a:435-442,ORF1a:1082-1096,ORF1a:1158-1172,ORF1a:1665-1670,ORF1a:1961-1971,ORF1a:2243-2261,ORF1b:1093-1097,ORF1b:1940-2040,ORF1b:2152-2338,ORF1b:2562-2640,ORF1b:2648-2654,ORF1b:2658-2659,ORF7a:43-122,ORF7b:1-44,ORF8:1-66,S:52-253,S:272-287		3000	89.5185	mediocre	2717	10	0
hCoV-19/USA/WI-MHDL-2021120280/2021|EPI_ISL_7828344|2021-11-08	hCoV-19/USA/WI-MHDL-2021120280/2021	EPI_ISL_7828344	2021-11-08	21J	AY.103	B.1.617.2.103	21J	Delta	21J (Delta)	0.694444	good	41	13	0	0	267	0	31	4	0	89	89224	39	29854	0.988162	false	G210T,C241T,T2827C,C3037T,G4105T,G4181T,C6402T,C7124T,C8986T,G9053T,C10029T,A11201G,A11332G,C11572T,C12624A,T12703C,C14408T,G15451A,C16466T,A17236G,C19220T,T21087C,C21618G,G21987A,T22917G,C22995A,A23403G,C23604G,C24208T,G24410A,C25469T,T26767C,T27291C,T27638C,C27752T,C27874T,A28461G,G28881T,G28916T,G29402T,G29742T	22029-22034,28248-28253,28271			M:I82T,N:D63G,N:R203M,N:G215C,N:D377Y,ORF1a:K1280N,ORF1a:A1306S,ORF1a:P2046L,ORF1a:P2287S,ORF1a:V2930L,ORF1a:T3255I,ORF1a:T3646A,ORF1a:P4120H,ORF1b:P314L,ORF1b:G662S,ORF1b:P1000L,ORF1b:I1257V,ORF1b:A1918V,ORF3a:S26L,ORF7a:V82A,ORF7a:T120I,ORF7b:T40I,ORF9b:T60A,S:T19R,S:G142D,S:R158G,S:L452R,S:T478K,S:D614G,S:P681R,S:D950N	ORF8:D119-,ORF8:F120-,S:E156-,S:F157-			T27291C|21J	T2827C,G4105T,C11572T,C12624A,T12703C,T21087C	0	1	6	7	19291-19557	ORF1b:1942-2030		3000	0	good	267	10	0
hCoV-19/USA/WI-MHDL-2021120281/2021|EPI_ISL_7828345|2021-11-08	hCoV-19/USA/WI-MHDL-2021120281/2021	EPI_ISL_7828345	2021-11-08	21J	B.1.617.2	B.1.617.2	21J	Delta	21J (Delta)	9.78472	good	39	7	0	0	930	0	28	2	0	316	89255	39	29853	0.965957	false	G210T,C241T,C2371A,C3037T,G3304T,G3433T,G3692T,T3862C,G4181T,C6402T,C7124T,C8986T,G9053T,C10029T,G10870T,A11201G,A11332G,C14085A,C14408T,G15451A,C15714T,C16466T,A16644G,C19220T,G20274T,C21618G,T22917G,C22995A,A23403G,C23604G,G24410A,C25469T,T26767C,C27874T,A28461G,G28881T,G28916T,G29402T,G29742T	28248-28253,28271			M:I82T,N:D63G,N:R203M,N:G215C,N:D377Y,ORF1a:E1013D,ORF1a:V1143F,ORF1a:A1306S,ORF1a:P2046L,ORF1a:P2287S,ORF1a:V2930L,ORF1a:T3255I,ORF1a:T3646A,ORF1b:N206K,ORF1b:P314L,ORF1b:G662S,ORF1b:P1000L,ORF1b:A1918V,ORF1b:M2269I,ORF3a:S26L,ORF7b:T40I,ORF9b:T60A,S:T19R,S:L452R,S:T478K,S:D614G,S:P681R,S:D950N	ORF8:D119-,ORF8:F120-			C15714T|21L&22B&22E&22C&23A&22A&22D&22F&rec&23B	C2371A,G3304T,G3433T,G3692T,T3862C,G10870T,C14085A,A16644G,G20274T	0	1	9	10	19291-19557,21389-21398,21733-21902,21917-22036,22046-22061,22084-22087,22090-22168,27528-27791	ORF1b:1942-2030,ORF1b:2641-2644,ORF7a:45-122,ORF7b:1-12,S:57-114,S:119-158,S:162-167,S:174-202		3000	23.3333	good	930	10	0
hCoV-19/USA/WI-MHDL-2021120282/2021|EPI_ISL_7828346|2021-11-08	hCoV-19/USA/WI-MHDL-2021120282/2021	EPI_ISL_7828346	2021-11-08	21J	AY.44	B.1.617.2.44	21J	Delta	21J (Delta)	44.4444	mediocre	44	13	0	0	268	0	37	4	0	90	89212	39	29854	0.988128	false	G210T,C241T,C3037T,C3796T,G4181T,C6040T,G6369T,C6402T,C6638T,C7124T,C7926T,C8986T,G9053T,C10029T,A11201G,A11332G,A13338G,T14014G,C14408T,G15451A,C16466T,C16726T,C19220T,G20238T,C21618G,G21987A,T22917G,C22995A,A23403G,C23604G,G24410A,C25469T,T26767C,T27638C,C27752T,C27874T,G28073T,A28461G,G28881T,G28916T,G29402T,G29477T,A29700G,G29742T	22029-22034,28248-28253,28271			M:I82T,N:D63G,N:R203M,N:G215C,N:D377Y,N:D402Y,ORF1a:A1306S,ORF1a:G2035V,ORF1a:P2046L,ORF1a:H2125Y,ORF1a:P2287S,ORF1a:A2554V,ORF1a:V2930L,ORF1a:T3255I,ORF1a:T3646A,ORF1a:N4358S,ORF1b:F183V,ORF1b:P314L,ORF1b:G662S,ORF1b:P1000L,ORF1b:H1087Y,ORF1b:A1918V,ORF1b:R2257S,ORF3a:S26L,ORF7a:V82A,ORF7a:T120I,ORF7b:T40I,ORF8:L60F,ORF9b:T60A,S:T19R,S:G142D,S:R158G,S:L452R,S:T478K,S:D614G,S:P681R,S:D950N	ORF8:D119-,ORF8:F120-,S:E156-,S:F157-			C3796T|22D,C6638T|21J,C7926T|21J&21K,C16726T|21J,G28073T|21J	G6369T,A13338G,G20238T,G29477T	0	5	4	9	19291-19558	ORF1b:1942-2031		3000	0	good	268	10	0
hCoV-19/USA/WI-MHDL-2021120283/2021|EPI_ISL_7828347|2021-11-08	hCoV-19/USA/WI-MHDL-2021120283/2021	EPI_ISL_7828347	2021-11-08	21J	AY.119	B.1.617.2.119	21J	Delta	21J (Delta)	0.694444	good	44	16	0	0	268	0	35	5	0	90	89196	39	29854	0.988128	false	G210T,C241T,C3037T,C3177T,G4181T,C6402T,C7124T,A8812G,C8829T,T8869C,C8986T,G9053T,C10029T,A11201G,A11332G,A12526C,C12756T,C14408T,G15451A,C16178T,C16466T,G19006T,C19220T,C21618G,C21846T,G21987A,T22423C,T22917G,C22995A,A23403G,C23604G,C23987T,C24370T,G24410A,C25469T,T26767C,T27638C,C27752T,C27874T,A28461G,G28881T,G28916T,G29402T,G29742T	22029-22034,27526-27528,28248-28253,28271			M:I82T,N:D63G,N:R203M,N:G215C,N:D377Y,ORF1a:P971L,ORF1a:A1306S,ORF1a:P2046L,ORF1a:P2287S,ORF1a:A2855V,ORF1a:V2930L,ORF1a:T3255I,ORF1a:T3646A,ORF1a:T4164I,ORF1b:P314L,ORF1b:G662S,ORF1b:S904L,ORF1b:P1000L,ORF1b:A1847S,ORF1b:A1918V,ORF3a:S26L,ORF7a:V82A,ORF7a:T120I,ORF7b:T40I,ORF9b:T60A,S:T19R,S:T95I,S:G142D,S:R158G,S:L452R,S:T478K,S:D614G,S:P681R,S:P809S,S:D950N	ORF7a:P45-,ORF8:D119-,ORF8:F120-,S:E156-,S:F157-				C3177T,A8812G,T8869C,A12526C,C12756T,C16178T,T22423C,C23987T,C24370T	0	0	9	9	19291-19558	ORF1b:1942-2031		3000	0	good	268	10	0
hCoV-19/USA/WI-MHDL-2021120285/2021|EPI_ISL_7828348|2021-11-08	hCoV-19/USA/WI-MHDL-2021120285/2021	EPI_ISL_7828348	2021-11-08	21J	AY.3	B.1.617.2.3	21J	Delta	21J (Delta)	0.982853	good	38	13	3	0	445	0	30	4	1	153	88725	39	29686	0.976591	false	G210T,C241T,T2083C,C3037T,G4181T,C6402T,C7124T,C8986T,G9053T,C10029T,A11201G,A11332G,A11456G,C14408T,G15451A,C16466T,C19220T,C21618G,G21770A,G21987A,T22917G,C22995A,T23284C,A23403G,C23604G,G24410A,C25339T,C25469T,A26021C,T26767C,C27874T,G28373T,A28461G,G28881T,G28916T,G29050A,G29402T,C29509T	22029-22034,28248-28253,28271	25701:CCC		M:I82T,N:G34W,N:D63G,N:R203M,N:G215C,N:D377Y,ORF1a:A1306S,ORF1a:P2046L,ORF1a:P2287S,ORF1a:V2930L,ORF1a:T3255I,ORF1a:T3646A,ORF1a:I3731V,ORF1b:P314L,ORF1b:G662S,ORF1b:P1000L,ORF1b:A1918V,ORF3a:S26L,ORF3a:D210A,ORF7b:T40I,ORF9b:T60A,S:T19R,S:V70I,S:G142D,S:R158G,S:L452R,S:T478K,S:D614G,S:P681R,S:D950N	ORF8:D119-,ORF8:F120-,S:E156-,S:F157-	ORF3a:103:P	C27638T		T2083C,G21770A,A26021C,G28373T	1	0	4	5	19293-19557,21329-21364,27650-27784,27787-27795	ORF1b:1942-2030,ORF1b:2621-2633,ORF7a:86-122,ORF7b:1-14		3000	5.37037	good	445	10	0
hCoV-19/USA/WI-MHDL-2021120286/2021|EPI_ISL_7828349|2021-11-08	hCoV-19/USA/WI-MHDL-2021120286/2021	EPI_ISL_7828349	2021-11-08	21J	AY.103	B.1.617.2.103	21J	Delta	21J (Delta)	6.25	good	42	13	0	0	17	0	32	4	0	7	89235	31	29851	0.996689	false	G210T,C241T,A1515G,A2182G,C3037T,G4181T,A5073C,C5575T,C6402T,C7124T,C8986T,G9053T,C10029T,A11201G,A11332G,C14408T,G15451A,C16466T,A17236G,G17721T,C19220T,C21618G,G21987A,T22917G,C22995A,A23403G,C23604G,C24208T,G24410A,C25469T,T26767C,A27123G,T27291C,T27638C,C27752T,C27874T,A28461G,G28881T,G28916T,G29402T,C29509T,G29742T	22029-22034,28248-28253,28271			M:I82T,M:I201V,N:D63G,N:R203M,N:G215C,N:D377Y,ORF1a:H417R,ORF1a:A1306S,ORF1a:D1603A,ORF1a:P2046L,ORF1a:P2287S,ORF1a:V2930L,ORF1a:T3255I,ORF1a:T3646A,ORF1b:P314L,ORF1b:G662S,ORF1b:P1000L,ORF1b:I1257V,ORF1b:A1918V,ORF3a:S26L,ORF7a:V82A,ORF7a:T120I,ORF7b:T40I,ORF9b:T60A,S:T19R,S:G142D,S:R158G,S:L452R,S:T478K,S:D614G,S:P681R,S:D950N	ORF8:D119-,ORF8:F120-,S:E156-,S:F157-			T27291C|21J,C29509T|21J	A1515G,A2182G,A5073C,C5575T,G17721T,A27123G	0	2	6	8	19298-19301,19369-19379,19421-19422	ORF1b:1944-1945,ORF1b:1968-1971,ORF1b:1985		3000	0	good	17	10	0
hCoV-19/USA/WI-MHDL-2021120287/2021|EPI_ISL_7828350|2021-11-08	hCoV-19/USA/WI-MHDL-2021120287/2021	EPI_ISL_7828350	2021-11-08	21J	AY.103	B.1.617.2.103	21J	Delta	21J (Delta)	11.1111	good	40	13	0	0	261	0	30	4	0	88	89261	31	29857	0.98873	false	G210T,C241T,C3037T,G4181T,C6402T,T6661C,C7124T,G7954A,C8986T,G9053T,T9253C,C10029T,C10156T,A11201G,A11332G,C14408T,G15451A,C16466T,A17236G,C19220T,C21618G,G21987A,T22917G,C22995A,A23403G,C23604G,C24208T,G24410A,C25469T,G26589T,T26767C,T27291C,C27752T,C27874T,G27967A,A28461G,G28881T,G28916T,G29402T,G29742T	22029-22034,28248-28253,28271			M:V23L,M:I82T,N:D63G,N:R203M,N:G215C,N:D377Y,ORF1a:A1306S,ORF1a:P2046L,ORF1a:P2287S,ORF1a:V2930L,ORF1a:T3255I,ORF1a:T3646A,ORF1b:P314L,ORF1b:G662S,ORF1b:P1000L,ORF1b:I1257V,ORF1b:A1918V,ORF3a:S26L,ORF7a:T120I,ORF7b:T40I,ORF8:C25Y,ORF9b:T60A,S:T19R,S:G142D,S:R158G,S:L452R,S:T478K,S:D614G,S:P681R,S:D950N	ORF8:D119-,ORF8:F120-,S:E156-,S:F157-		C27638T	T27291C|21J	T6661C,G7954A,T9253C,C10156T,G26589T,G27967A	1	1	6	8	19292-19552	ORF1b:1942-2029		3000	0	good	261	10	0
hCoV-19/USA/WI-MHDL-2021120288/2021|EPI_ISL_7828351|2021-11-08	hCoV-19/USA/WI-MHDL-2021120288/2021	EPI_ISL_7828351	2021-11-08	21J	AY.3	B.1.617.2.3	21J	Delta	21J (Delta)	1.5625	good	45	13	0	0	268	0	34	4	0	88	89094	31	29808	0.986858	false	G210T,C241T,C1593T,C2701T,C3037T,G4181T,C6196T,C6402T,C7124T,G8781A,C8986T,G9053T,C10029T,A11201G,A11332G,A11456G,T11731C,C14408T,G15451A,C16289T,C16466T,C19220T,C21618G,G21987A,T22917G,C22995A,T23284C,A23403G,C23604G,G24410A,C25339T,C25469T,C25624T,T26767C,C26895T,T27638C,C27752T,C27874T,A28461G,G28881T,G28916T,G29050A,G29402T,C29509T,G29742T	22029-22034,28248-28253,28271			M:I82T,M:H125Y,N:D63G,N:R203M,N:G215C,N:D377Y,ORF1a:S443F,ORF1a:A1306S,ORF1a:P2046L,ORF1a:P2287S,ORF1a:S2839N,ORF1a:V2930L,ORF1a:T3255I,ORF1a:T3646A,ORF1a:I3731V,ORF1b:P314L,ORF1b:G662S,ORF1b:A941V,ORF1b:P1000L,ORF1b:A1918V,ORF3a:S26L,ORF3a:H78Y,ORF7a:V82A,ORF7a:T120I,ORF7b:T40I,ORF9b:T60A,S:T19R,S:G142D,S:R158G,S:L452R,S:T478K,S:D614G,S:P681R,S:D950N	ORF8:D119-,ORF8:F120-,S:E156-,S:F157-			C25624T|21L	C1593T,C2701T,C6196T,G8781A,T11731C,C16289T,C26895T	0	1	7	8	19293-19553,29799-29805	ORF1b:1942-2029		3000	0	good	268	10	0
hCoV-19/USA/WI-MHDL-2021120289/2021|EPI_ISL_7828352|2021-11-08	hCoV-19/USA/WI-MHDL-2021120289/2021	EPI_ISL_7828352	2021-11-08	21J	AY.103	B.1.617.2.103	21J	Delta	21J (Delta)	14.0625	good	41	13	0	0	261	0	31	4	0	87	89233	39	29857	0.988463	false	G210T,C241T,T2827C,C3037T,G4105T,G4181T,C6402T,C7124T,C8986T,G9053T,G9092A,C10029T,A11201G,A11332G,C11572T,C12624A,C14408T,G15451A,C16466T,A17236G,C19220T,T21087C,C21618G,G21987A,T22917G,C22978A,C22995A,A23403G,C23604G,C24208T,G24410A,C25469T,T26767C,T27291C,C27752T,C27874T,A28461G,G28881T,G28916T,G29402T,G29742T	22029-22034,28248-28253,28271			M:I82T,N:D63G,N:R203M,N:G215C,N:D377Y,ORF1a:K1280N,ORF1a:A1306S,ORF1a:P2046L,ORF1a:P2287S,ORF1a:V2930L,ORF1a:V2943I,ORF1a:T3255I,ORF1a:T3646A,ORF1a:P4120H,ORF1b:P314L,ORF1b:G662S,ORF1b:P1000L,ORF1b:I1257V,ORF1b:A1918V,ORF3a:S26L,ORF7a:T120I,ORF7b:T40I,ORF9b:T60A,S:T19R,S:G142D,S:R158G,S:L452R,S:T478K,S:D614G,S:P681R,S:D950N	ORF8:D119-,ORF8:F120-,S:E156-,S:F157-		C27638T	T27291C|21J	T2827C,G4105T,G9092A,C11572T,C12624A,T21087C,C22978A	1	1	7	9	19291-19551	ORF1b:1942-2028		3000	0	good	261	10	0
hCoV-19/USA/WI-MHDL-2021120290/2021|EPI_ISL_7828353|2021-11-08	hCoV-19/USA/WI-MHDL-2021120290/2021	EPI_ISL_7828353	2021-11-08	21J	AY.44	B.1.617.2.44	21J	Delta	21J (Delta)	29.3403	good	44	13	0	0	265	0	37	4	0	89	89257	31	29861	0.98873	false	G210T,C241T,C823T,C3037T,A3848G,G4181T,C5358T,T5600C,C6040T,C6402T,C6638T,C7124T,C7926T,C8986T,G9053T,C10029T,A11201G,A11332G,T14014G,C14408T,G15451A,C16466T,C16726T,C19220T,C21618G,G21987A,T22917G,C22995A,A23403G,C23604G,G24410A,C25469T,A26086G,T26767C,T27638C,C27752T,C27874T,G28073T,A28461G,G28881T,G28916T,G29402T,A29700G,G29742T	22029-22034,28248-28253,28271			M:I82T,N:D63G,N:R203M,N:G215C,N:D377Y,ORF1a:S1195G,ORF1a:A1306S,ORF1a:A1698V,ORF1a:F1779L,ORF1a:P2046L,ORF1a:H2125Y,ORF1a:P2287S,ORF1a:A2554V,ORF1a:V2930L,ORF1a:T3255I,ORF1a:T3646A,ORF1b:F183V,ORF1b:P314L,ORF1b:G662S,ORF1b:P1000L,ORF1b:H1087Y,ORF1b:A1918V,ORF3a:S26L,ORF3a:I232V,ORF7a:V82A,ORF7a:T120I,ORF7b:T40I,ORF8:L60F,ORF9b:T60A,S:T19R,S:G142D,S:R158G,S:L452R,S:T478K,S:D614G,S:P681R,S:D950N	ORF8:D119-,ORF8:F120-,S:E156-,S:F157-			C6638T|21J,C7926T|21J&21K,C16726T|21J,G28073T|21J	C823T,A3848G,C5358T,T5600C,A26086G	0	4	5	9	19293-19557	ORF1b:1942-2030		3000	0	good	265	10	0
hCoV-19/USA/WI-MHDL-2021120291/2021|EPI_ISL_7828354|2021-11-08	hCoV-19/USA/WI-MHDL-2021120291/2021	EPI_ISL_7828354	2021-11-08	21J	AY.39.1	B.1.617.2.39.1	21J	Delta	21J (Delta)	76.5625	mediocre	41	7	0	0	265	0	32	2	0	90	89250	39	29854	0.988229	false	G210T,C241T,C3037T,G4181T,C6402T,C7124T,C8986T,G9053T,C10029T,A11201G,A11332G,C11620T,C12073T,A13482G,C14408T,G15451A,C16466T,G19086T,C19220T,G19894A,C21304T,G21372T,G21538A,C21618G,T22917G,C22995A,A23403G,C23604G,G24410A,C25469T,T25676C,T26767C,G26828T,G27604A,T27638C,C27874T,A28461G,G28881T,G28916T,G29402T,G29742T	28248-28253,28271			M:I82T,N:D63G,N:R203M,N:G215C,N:D377Y,ORF1a:A1306S,ORF1a:P2046L,ORF1a:P2287S,ORF1a:V2930L,ORF1a:T3255I,ORF1a:T3646A,ORF1b:P314L,ORF1b:G662S,ORF1b:P1000L,ORF1b:K1873N,ORF1b:A1918V,ORF1b:A2143T,ORF1b:R2613C,ORF1b:Q2635H,ORF1b:V2691I,ORF3a:S26L,ORF3a:L95S,ORF7a:V71I,ORF7a:V82A,ORF7b:T40I,ORF9b:T60A,S:T19R,S:L452R,S:T478K,S:D614G,S:P681R,S:D950N	ORF8:D119-,ORF8:F120-		T21846C,A21987G,T27752C	C21304T|20G	C11620T,C12073T,G19086T,G19894A,G21538A,T25676C,G26828T	3	1	7	11	19293-19551,22029-22034	ORF1b:1942-2028,S:156-158		3000	0	good	265	10	0
hCoV-19/USA/WI-MHDL-2021120292/2021|EPI_ISL_7828355|2021-11-08	hCoV-19/USA/WI-MHDL-2021120292/2021	EPI_ISL_7828355	2021-11-08	21J	AY.39.1	B.1.617.2.39.1	21J	Delta	21J (Delta)	14.0625	good	43	13	0	0	260	0	35	4	0	88	89228	38	29857	0.98853	false	G210T,C241T,C3037T,G4181T,C6402T,C7124T,C8986T,G9053T,C10029T,A11201G,A11332G,C11620T,C12073T,A13482G,C14408T,G15451A,C16466T,G19086T,C19220T,G19894A,C21304T,G21372T,G21538A,C21618G,C21846T,T22917G,C22995A,A23403G,C23604G,G24410A,C25469T,T25676C,T26767C,G26828T,G27604A,T27638C,C27752T,C27874T,A28461G,G28881T,G28916T,G29402T,G29742T	22029-22034,28248-28253,28271			M:I82T,N:D63G,N:R203M,N:G215C,N:D377Y,ORF1a:A1306S,ORF1a:P2046L,ORF1a:P2287S,ORF1a:V2930L,ORF1a:T3255I,ORF1a:T3646A,ORF1b:P314L,ORF1b:G662S,ORF1b:P1000L,ORF1b:K1873N,ORF1b:A1918V,ORF1b:A2143T,ORF1b:R2613C,ORF1b:Q2635H,ORF1b:V2691I,ORF3a:S26L,ORF3a:L95S,ORF7a:V71I,ORF7a:V82A,ORF7a:T120I,ORF7b:T40I,ORF9b:T60A,S:T19R,S:T95I,S:R158G,S:L452R,S:T478K,S:D614G,S:P681R,S:D950N	ORF8:D119-,ORF8:F120-,S:E156-,S:F157-		A21987G	C21304T|20G	C11620T,C12073T,G19086T,G19894A,G21538A,T25676C,G26828T	1	1	7	9	19293-19552	ORF1b:1942-2029		3000	0	good	260	10	0
hCoV-19/USA/WI-MHDL-2021120293/2021|EPI_ISL_7828356|2021-11-08	hCoV-19/USA/WI-MHDL-2021120293/2021	EPI_ISL_7828356	2021-11-08	21J	AY.103	B.1.617.2.103	21J	Delta	21J (Delta)	10.6148	good	37	13	0	0	692	0	29	4	0	234	89237	39	29853	0.973916	false	G210T,C241T,T1704C,C3037T,G4181T,C6402T,C7124T,C8986T,G9053T,C10029T,A11201G,A11332G,C11572T,G11596T,C14408T,G15451A,C16466T,A17236G,G17280T,C19220T,C21618G,T22917G,C22995A,A23403G,G23499A,C23604G,C24208T,G24410A,C25469T,T26767C,T27291C,C27874T,A28461G,G28881T,G28916T,G29402T,G29742T	22029-22034,28248-28253,28271			M:I82T,N:D63G,N:R203M,N:G215C,N:D377Y,ORF1a:F480S,ORF1a:A1306S,ORF1a:P2046L,ORF1a:P2287S,ORF1a:V2930L,ORF1a:T3255I,ORF1a:T3646A,ORF1a:Q3777H,ORF1b:P314L,ORF1b:G662S,ORF1b:P1000L,ORF1b:I1257V,ORF1b:A1918V,ORF3a:S26L,ORF7b:T40I,ORF9b:T60A,S:T19R,S:R158G,S:L452R,S:T478K,S:D614G,S:R646H,S:P681R,S:D950N	ORF8:D119-,ORF8:F120-,S:E156-,S:F157-		A21987G	T27291C|21J	T1704C,C11572T,G11596T,G17280T,G23499A	1	1	5	7	19291-19613,21162-21207,21915-21973,27528-27791	ORF1b:1942-2049,ORF1b:2565-2580,ORF7a:45-122,ORF7b:1-12,S:118-137		3000	14.5185	good	692	10	0
hCoV-19/USA/WI-MHDL-2021120294/2021|EPI_ISL_7828357|2021-11-08	hCoV-19/USA/WI-MHDL-2021120294/2021	EPI_ISL_7828357	2021-11-08	21J	AY.103	B.1.617.2.103	21J	Delta	21J (Delta)	8.50694	good	43	13	0	0	267	0	33	4	0	89	89219	39	29855	0.988195	false	G210T,C241T,C1684T,C3037T,G4181T,C6402T,C7124T,C8386T,A8520C,C8986T,G9053T,C10029T,A11201G,A11332G,C11572T,C12915T,C14408T,G15451A,C16466T,A17236G,C19220T,C21618G,G21987A,G22770A,T22917G,C22995A,A23403G,C23604G,C24208T,G24410A,C25469T,T26767C,T27291C,C27625T,T27638C,C27752T,C27874T,A28461G,G28881T,G28916T,G29402T,G29742T,C29774T	22029-22034,28248-28253,28271			M:I82T,N:D63G,N:R203M,N:G215C,N:D377Y,ORF1a:A1306S,ORF1a:P2046L,ORF1a:P2287S,ORF1a:N2752T,ORF1a:V2930L,ORF1a:T3255I,ORF1a:T3646A,ORF1a:T4217I,ORF1b:P314L,ORF1b:G662S,ORF1b:P1000L,ORF1b:I1257V,ORF1b:A1918V,ORF3a:S26L,ORF7a:R78C,ORF7a:V82A,ORF7a:T120I,ORF7b:T40I,ORF9b:T60A,S:T19R,S:G142D,S:R158G,S:R403K,S:L452R,S:T478K,S:D614G,S:P681R,S:D950N	ORF8:D119-,ORF8:F120-,S:E156-,S:F157-			C1684T|21I,T27291C|21J	C8386T,A8520C,C11572T,C12915T,G22770A,C27625T,C29774T	0	2	7	9	19291-19557	ORF1b:1942-2030		3000	0	good	267	10	0
hCoV-19/USA/WI-MHDL-2021120295/2021|EPI_ISL_7828358|2021-11-08	hCoV-19/USA/WI-MHDL-2021120295/2021	EPI_ISL_7828358	2021-11-08	21J	AY.103	B.1.617.2.103	21J	Delta	21J (Delta)	29.3403	good	45	19	0	0	265	0	35	6	0	89	89182	39	29854	0.988229	false	G210T,C241T,T2827C,C3037T,G4105T,G4181T,T6096C,C6402T,C7124T,C8986T,G9053T,C10029T,A11201G,A11332G,C11572T,C12624A,C14408T,T14646C,G15451A,C16466T,A17236G,C19154T,C19220T,T21087C,C21618G,C21762T,C21846T,G21987A,T22917G,C22995A,A23403G,C23604G,C24208T,G24410A,C25469T,T26767C,T27291C,T27638C,C27752T,C27874T,A28461G,G28881T,G28916T,G29402T,G29742T	21765-21770,22029-22034,28248-28253,28271			M:I82T,N:D63G,N:R203M,N:G215C,N:D377Y,ORF1a:K1280N,ORF1a:A1306S,ORF1a:L1944S,ORF1a:P2046L,ORF1a:P2287S,ORF1a:V2930L,ORF1a:T3255I,ORF1a:T3646A,ORF1a:P4120H,ORF1b:P314L,ORF1b:G662S,ORF1b:P1000L,ORF1b:I1257V,ORF1b:T1896I,ORF1b:A1918V,ORF3a:S26L,ORF7a:V82A,ORF7a:T120I,ORF7b:T40I,ORF9b:T60A,S:T19R,S:A67V,S:T95I,S:G142D,S:R158G,S:L452R,S:T478K,S:D614G,S:P681R,S:D950N	ORF8:D119-,ORF8:F120-,S:H69-,S:V70-,S:E156-,S:F157-			C21762T|21K&21D,C21846T|21K&21J&21F&21H&rec&21B,T27291C|21J	T2827C,G4105T,T6096C,C11572T,C12624A,T14646C,C19154T,T21087C	0	3	8	11	19293-19557	ORF1b:1942-2030		3000	0	good	265	10	0
hCoV-19/USA/WI-MHDL-2021120296/2021|EPI_ISL_7828359|2021-11-08	hCoV-19/USA/WI-MHDL-2021120296/2021	EPI_ISL_7828359	2021-11-08	21J	AY.3	B.1.617.2.3	21J	Delta	21J (Delta)	21.3074	good	44	13	0	0	448	0	30	4	0	154	88732	31	29686	0.976758	false	G210T,C241T,C3037T,G4181T,C5173T,C6402T,T6409C,C7124T,C8986T,G9053T,C10029T,A10829C,A10872T,A11201G,A11332G,A11456G,C13536T,C14408T,G15451A,C16466T,C19220T,T20166C,C21618G,G21987A,G22094C,G22225T,C22624T,T22917G,C22995A,T23284C,A23403G,C23604G,G24410A,T25232C,C25339T,C25469T,T26767C,C27874T,A28461G,G28881T,G28916T,G29050A,G29402T,C29509T	22029-22034,28248-28253,28271			M:I82T,N:D63G,N:R203M,N:G215C,N:D377Y,ORF1a:A1306S,ORF1a:P2046L,ORF1a:P2287S,ORF1a:V2930L,ORF1a:T3255I,ORF1a:I3522L,ORF1a:Q3536L,ORF1a:T3646A,ORF1a:I3731V,ORF1b:P314L,ORF1b:G662S,ORF1b:P1000L,ORF1b:A1918V,ORF3a:S26L,ORF7b:T40I,ORF9b:T60A,S:T19R,S:G142D,S:R158G,S:D178H,S:L452R,S:T478K,S:D614G,S:P681R,S:D950N	ORF8:D119-,ORF8:F120-,S:E156-,S:F157-		C27638T	C13536T|20D&21G	C5173T,T6409C,A10829C,A10872T,T20166C,G22094C,G22225T,C22624T,T25232C	1	1	9	11	19291-19557,21747-21758,27528-27535,27585-27591,27650-27803	ORF1b:1942-2030,ORF7a:45-48,ORF7a:64-66,ORF7a:86-122,ORF7b:1-16,S:62-66		3000	5.48148	good	448	10	0
hCoV-19/USA/WI-MHDL-2021120297/2021|EPI_ISL_7828360|2021-11-08	hCoV-19/USA/WI-MHDL-2021120297/2021	EPI_ISL_7828360	2021-11-08	21J	AY.119	B.1.617.2.119	21J	Delta	21J (Delta)	0	good	41	13	0	0	267	0	35	4	0	89	89227	39	29855	0.988195	false	G210T,C241T,C3037T,T3913C,G4181T,C6402T,C7124T,C8829T,C8986T,G9053T,C10029T,A11201G,A11332G,C12756T,C14408T,G15451A,C16466T,G19006T,C19220T,G19684T,C21618G,C21846T,G21987A,T22917G,C22995A,A23403G,C23604G,C23987T,G24410A,C25418A,C25469T,T26767C,T27638C,C27752T,C27874T,A28461G,C28807T,G28881T,G28916T,G29402T,G29742T	22029-22034,28248-28253,28271			M:I82T,N:D63G,N:R203M,N:G215C,N:D377Y,ORF1a:A1306S,ORF1a:P2046L,ORF1a:P2287S,ORF1a:A2855V,ORF1a:V2930L,ORF1a:T3255I,ORF1a:T3646A,ORF1a:T4164I,ORF1b:P314L,ORF1b:G662S,ORF1b:P1000L,ORF1b:A1847S,ORF1b:A1918V,ORF1b:V2073L,ORF3a:T9K,ORF3a:S26L,ORF7a:V82A,ORF7a:T120I,ORF7b:T40I,ORF9b:T60A,S:T19R,S:T95I,S:G142D,S:R158G,S:L452R,S:T478K,S:D614G,S:P681R,S:P809S,S:D950N	ORF8:D119-,ORF8:F120-,S:E156-,S:F157-				T3913C,C12756T,G19684T,C23987T,C25418A,C28807T	0	0	6	6	19291-19557	ORF1b:1942-2030		3000	0	good	267	10	0
hCoV-19/USA/WI-MHDL-2021120298/2021|EPI_ISL_7828361|2021-11-08	hCoV-19/USA/WI-MHDL-2021120298/2021	EPI_ISL_7828361	2021-11-08	21J	AY.103	B.1.617.2.103	21J	Delta	21J (Delta)	16.0989	good	42	13	0	0	903	0	31	4	0	307	89211	39	29851	0.966793	false	G210T,C241T,C3037T,G3328T,G4181T,C6402T,T6814G,C7124T,C8986T,G9053T,C10029T,A11201G,A11332G,C11572T,C12525T,C14408T,C14925T,G15451A,C16466T,A17236G,C18744T,C19220T,C21618G,G21987A,T22917G,C22995A,G23401T,A23403G,C23604G,C24208T,G24410A,C25469T,T26767C,T27291C,C27874T,G28001T,C28236T,A28461G,G28881T,G28916T,G29402T,G29742T	22029-22034,28248-28253,28271			M:I82T,N:D63G,N:R203M,N:G215C,N:D377Y,ORF1a:Q1021H,ORF1a:A1306S,ORF1a:P2046L,ORF1a:P2287S,ORF1a:V2930L,ORF1a:T3255I,ORF1a:T3646A,ORF1a:T4087I,ORF1b:P314L,ORF1b:G662S,ORF1b:P1000L,ORF1b:I1257V,ORF1b:A1918V,ORF3a:S26L,ORF7b:T40I,ORF8:R115C,ORF9b:T60A,S:T19R,S:G142D,S:R158G,S:L452R,S:T478K,S:Q613H,S:D614G,S:P681R,S:D950N	ORF8:D119-,ORF8:F120-,S:E156-,S:F157-			C18744T|21J,T27291C|21J	G3328T,T6814G,C11572T,C12525T,C14925T,G23401T,G28001T,C28236T	0	2	8	10	19291-19558,21162-21366,21371,21737-21758,21771-21860,21872-21912,27528-27803	ORF1b:1942-2031,ORF1b:2565-2633,ORF1b:2635,ORF7a:45-122,ORF7b:1-16,S:59-66,S:70-100,S:104-117		3000	22.3333	good	903	10	0
hCoV-19/USA/WI-WSLH-221369/2021|EPI_ISL_6719997|2021-11-08	hCoV-19/USA/WI-WSLH-221369/2021	EPI_ISL_6719997	2021-11-08	21J	AY.25.1	B.1.617.2.25.1	21J	Delta	21J (Delta)	42.104	mediocre	42	13	0	0	1865	0	35	4	0	633	89118	55	29836	0.933585	false	G210T,C241T,G2564A,C2838T,C3037T,G3308A,A3948G,G4181T,C6402T,T6979G,C7124T,C8986T,G9053T,C10029T,A11201G,A11332G,G11562T,T13375C,C14408T,G15451A,C16466T,C17703T,G19072T,C19220T,C21618G,A23403G,C23604G,G24410A,C25469T,G26107C,T26767C,A27507C,T27638C,C27752T,C27874T,G28326T,A28461G,C28770T,G28881T,G28916T,G29402T,G29742T	22029-22034,28248-28253,28271			M:I82T,N:G18V,N:D63G,N:T166I,N:R203M,N:G215C,N:D377Y,ORF1a:E767K,ORF1a:S858F,ORF1a:E1015K,ORF1a:D1228G,ORF1a:A1306S,ORF1a:P2046L,ORF1a:P2287S,ORF1a:V2930L,ORF1a:T3255I,ORF1a:T3646A,ORF1a:C3766F,ORF1b:P314L,ORF1b:G662S,ORF1b:P1000L,ORF1b:D1869Y,ORF1b:A1918V,ORF3a:S26L,ORF3a:E239Q,ORF7a:V82A,ORF7a:T120I,ORF7b:T40I,ORF9b:V15L,ORF9b:T60A,S:T19R,S:R158G,S:D614G,S:P681R,S:D950N	ORF8:D119-,ORF8:F120-,S:E156-,S:F157-			T6979G|22B,G28326T|21I	G2564A,C2838T,G3308A,T13375C,C17703T,G19072T,C28770T	0	2	7	9	385-664,1943-1995,2004-2015,2168-2177,2185-2205,3827-3904,8636-8840,8843-8913,10738-11022,20184-20200,21717-22008,22302-22542,22878-23144,26891-26904,27146-27164	M:123-128,M:208-214,ORF1a:40-133,ORF1a:560-577,ORF1a:580-584,ORF1a:635-638,ORF1a:640-647,ORF1a:1188-1213,ORF1a:2791-2883,ORF1a:3491-3586,ORF1b:2239-2245,S:52-149,S:247-327,S:439-528		3000	57.963	mediocre	1865	10	0
hCoV-19/USA/WI-WSLH-221393/2021|EPI_ISL_6719875|2021-11-08	hCoV-19/USA/WI-WSLH-221393/2021	EPI_ISL_6719875	2021-11-08	21J	AY.3	B.1.617.2.3	21J	Delta	21J (Delta)	0.505679	good	39	13	1	1	492	0	31	2	0	180	89123	55	29836	0.9795	false	G210T,C241T,C3037T,G4181T,C6402T,C6525T,C7124T,C8986T,G9053T,C10029T,A11201G,A11332G,A11456G,C14408T,G15451A,C16466T,C19156T,C19220T,C21618G,T22917G,C22995A,T23284C,A23403G,C23604G,G24410A,G25073C,C25339T,C25469T,T26767C,T27638C,C27752T,C27874T,A28461G,G28881T,G28916T,G29050A,G29402T,C29509T,G29742T	22029-22034,28248-28253,28271	28214:T	ORF8:108-122	M:I82T,N:D63G,N:R203M,N:G215C,N:D377Y,ORF1a:A1306S,ORF1a:P2046L,ORF1a:T2087I,ORF1a:P2287S,ORF1a:V2930L,ORF1a:T3255I,ORF1a:T3646A,ORF1a:I3731V,ORF1b:P314L,ORF1b:G662S,ORF1b:P1000L,ORF1b:H1897Y,ORF1b:A1918V,ORF3a:S26L,ORF7a:V82A,ORF7a:T120I,ORF7b:T40I,ORF9b:T60A,S:T19R,S:R158G,S:L452R,S:T478K,S:D614G,S:P681R,S:D950N,S:G1171R	S:E156-,S:F157-				C6525T,C19156T,G25073C	0	0	3	3	21717-21990,22325-22542	ORF8:108-122,S:52-143,S:255-327		3000	7.11111	good	492	10	0
hCoV-19/USA/WI-WSLH-221525/2021|EPI_ISL_7263619|2021-11-08	hCoV-19/USA/WI-WSLH-221525/2021	EPI_ISL_7263619	2021-11-08	21J	AY.103	B.1.617.2.103	21J	Delta	21J (Delta)	2.06818	good	41	13	0	0	492	0	32	4	0	165	89122	55	29836	0.9795	false	G210T,C241T,C2706T,C3037T,G4181T,C6402T,T6661C,C7124T,C8986T,G9053T,C10029T,A11201G,A11332G,C11779A,C14408T,T14448C,G15451A,C16466T,A17236G,C18646T,C19220T,C21618G,T22917G,C22995A,A23403G,C23604G,C24208T,G24410A,C25469T,T26767C,T27291C,T27638C,C27752T,C27874T,G27967A,A28461G,G28881T,G28916T,G29402T,G29734A,G29742T	22029-22034,28248-28253,28271			M:I82T,N:D63G,N:R203M,N:G215C,N:D377Y,ORF1a:T814I,ORF1a:A1306S,ORF1a:P2046L,ORF1a:P2287S,ORF1a:V2930L,ORF1a:T3255I,ORF1a:T3646A,ORF1a:F3838L,ORF1b:P314L,ORF1b:G662S,ORF1b:P1000L,ORF1b:I1257V,ORF1b:P1727S,ORF1b:A1918V,ORF3a:S26L,ORF7a:V82A,ORF7a:T120I,ORF7b:T40I,ORF8:C25Y,ORF9b:T60A,S:T19R,S:R158G,S:L452R,S:T478K,S:D614G,S:P681R,S:D950N	ORF8:D119-,ORF8:F120-,S:E156-,S:F157-			T27291C|21J	C2706T,T6661C,C11779A,T14448C,C18646T,G27967A,G29734A	0	1	7	8	21717-21990,22325-22542	S:52-143,S:255-327		3000	7.11111	good	492	10	0
hCoV-19/USA/WI-WSLH-221526/2021|EPI_ISL_7263620|2021-11-08	hCoV-19/USA/WI-WSLH-221526/2021	EPI_ISL_7263620	2021-11-08	21J	AY.44	B.1.617.2.44	21J	Delta	21J (Delta)	77.0682	mediocre	48	13	0	0	492	0	35	4	0	165	89094	55	29836	0.9795	false	G210T,C241T,C3037T,G4181T,C6040T,C6402T,C6638T,C7124T,C7926T,C8986T,G9053T,C9438T,C10029T,C10969T,A11201G,A11332G,C12784T,T14014G,C14408T,G15451A,C16466T,C16726T,G18412A,C19220T,T19305C,C20646T,C21618G,T22917G,C22995A,A23403G,C23604G,G24410A,C25469T,T26767C,G27604A,T27638C,C27752T,C27874T,G28073T,G28460A,A28461G,G28881T,G28916T,C29119T,G29402T,G29593T,A29700G,G29742T	22029-22034,28248-28253,28271			M:I82T,N:D63S,N:R203M,N:G215C,N:D377Y,ORF1a:A1306S,ORF1a:P2046L,ORF1a:H2125Y,ORF1a:P2287S,ORF1a:A2554V,ORF1a:V2930L,ORF1a:T3058I,ORF1a:T3255I,ORF1a:T3646A,ORF1b:F183V,ORF1b:P314L,ORF1b:G662S,ORF1b:P1000L,ORF1b:H1087Y,ORF1b:V1649I,ORF1b:A1918V,ORF3a:S26L,ORF7a:V71I,ORF7a:V82A,ORF7a:T120I,ORF7b:T40I,ORF8:L60F,ORF9b:T60A,S:T19R,S:R158G,S:L452R,S:T478K,S:D614G,S:P681R,S:D950N	ORF8:D119-,ORF8:F120-,S:E156-,S:F157-			C6638T|21J,C7926T|21J&21K,C16726T|21J,G27604A|21J,G28073T|21J	C9438T,C10969T,C12784T,G18412A,T19305C,C20646T,G28460A,C29119T,G29593T	0	5	9	14	21717-21990,22325-22542	S:52-143,S:255-327		3000	7.11111	good	492	10	0
hCoV-19/USA/WI-WSLH-221586/2021|EPI_ISL_7263689|2021-11-08	hCoV-19/USA/WI-WSLH-221586/2021	EPI_ISL_7263689	2021-11-08	21J	AY.100	B.1.617.2.100	21J	Delta	21J (Delta)	2.06818	good	43	13	0	0	492	0	32	4	0	165	89114	55	29836	0.9795	false	G210T,C241T,A532T,C2508T,C3037T,G4181T,C5812T,C6402T,C7124T,C8986T,G9053T,C9133A,C9559T,C10029T,A11201G,A11332G,C13329T,C14408T,C15240T,G15451A,C16466T,G17122T,G17427T,C19220T,C21618G,T22917G,C22995A,A23403G,C23604G,G24410A,C25469T,T26767C,T27638C,C27752T,C27874T,A27985T,T28007C,C28432T,A28461G,G28881T,G28916T,G29402T,G29742T	22029-22034,28248-28253,28271			M:I82T,N:D63G,N:R203M,N:G215C,N:D377Y,ORF1a:P748L,ORF1a:A1306S,ORF1a:P2046L,ORF1a:P2287S,ORF1a:V2930L,ORF1a:T3255I,ORF1a:T3646A,ORF1a:T4355I,ORF1b:P314L,ORF1b:G662S,ORF1b:P1000L,ORF1b:A1219S,ORF1b:A1918V,ORF3a:S26L,ORF7a:V82A,ORF7a:T120I,ORF7b:T40I,ORF8:Y31F,ORF9b:S50L,ORF9b:T60A,S:T19R,S:R158G,S:L452R,S:T478K,S:D614G,S:P681R,S:D950N	ORF8:D119-,ORF8:F120-,S:E156-,S:F157-			C28432T|21J	A532T,C2508T,C5812T,C9133A,C13329T,G17427T,A27985T	0	1	7	8	21717-21990,22325-22542	S:52-143,S:255-327		3000	7.11111	good	492	10	0
hCoV-19/USA/WI-MHDL-2021110389/2021|EPI_ISL_6945723|2021-11-09	hCoV-19/USA/WI-MHDL-2021110389/2021	EPI_ISL_6945723	2021-11-09	21I	AY.47	B.1.617.2.47	21I	Delta	21I (Delta)	0	good	36	13	0	0	274	0	30	4	0	92	89142	55	29836	0.986791	false	G210T,C241T,C1684T,C3037T,G5164T,C5184T,A5584G,C9891T,A10855G,T11418C,C11514T,C12049T,C13019T,C14408T,G15451A,C16466T,C21618G,C22227T,G22427A,T22917G,C22995A,A23403G,C23604G,G24410A,C25469T,C25669T,A25744G,C26029A,T26767C,T27638C,C27752T,G28326T,A28461G,G28881T,G29402T,G29742T	22029-22034,28248-28253,28271			M:I82T,N:G18V,N:D63G,N:R203M,N:D377Y,ORF1a:E1633D,ORF1a:P1640L,ORF1a:A3209V,ORF1a:V3718A,ORF1a:T3750I,ORF1b:P314L,ORF1b:G662S,ORF1b:P1000L,ORF3a:S26L,ORF3a:H93Y,ORF3a:I118V,ORF3a:Q213K,ORF7a:V82A,ORF7a:T120I,ORF9b:V15L,ORF9b:T60A,S:T19R,S:R158G,S:A222V,S:V289I,S:L452R,S:T478K,S:D614G,S:P681R,S:D950N	ORF8:D119-,ORF8:F120-,S:E156-,S:F157-				A10855G,C25669T,A25744G,C26029A	0	0	4	4	21717-21990	S:52-143		3000	0	good	274	10	0
hCoV-19/USA/WI-MHDL-2021110390/2021|EPI_ISL_6945724|2021-11-09	hCoV-19/USA/WI-MHDL-2021110390/2021	EPI_ISL_6945724	2021-11-09	21J	AY.103	B.1.617.2.103	21J	Delta	21J (Delta)	6.25	good	41	13	0	0	274	0	31	4	0	92	89122	55	29836	0.986791	false	G210T,C241T,T2827C,C3037T,G4181T,C6402T,C7124T,C8986T,G9053T,C10029T,A11201G,A11332G,C11572T,G12265A,C12624A,C14408T,G15451A,C16466T,A17236G,C18115T,C18795T,C19220T,C21575T,C21618G,T22917G,C22995A,A23403G,C23604G,C24208T,G24410A,C25469T,T26767C,T27291C,T27638C,C27752T,C27874T,A28461G,G28881T,G28916T,G29402T,G29742T	22029-22034,28248-28253,28271			M:I82T,N:D63G,N:R203M,N:G215C,N:D377Y,ORF1a:A1306S,ORF1a:P2046L,ORF1a:P2287S,ORF1a:V2930L,ORF1a:T3255I,ORF1a:T3646A,ORF1a:P4120H,ORF1b:P314L,ORF1b:G662S,ORF1b:P1000L,ORF1b:I1257V,ORF1b:H1550Y,ORF1b:A1918V,ORF3a:S26L,ORF7a:V82A,ORF7a:T120I,ORF7b:T40I,ORF9b:T60A,S:L5F,S:T19R,S:R158G,S:L452R,S:T478K,S:D614G,S:P681R,S:D950N	ORF8:D119-,ORF8:F120-,S:E156-,S:F157-			C21575T|21J&21F,T27291C|21J	T2827C,C11572T,G12265A,C12624A,C18115T,C18795T	0	2	6	8	21717-21990	S:52-143		3000	0	good	274	10	0
hCoV-19/USA/WI-MHDL-2021110471/2021|EPI_ISL_6861979|2021-11-09	hCoV-19/USA/WI-MHDL-2021110471/2021	EPI_ISL_6861979	2021-11-09	21J	AY.25	B.1.617.2.25	21J	Delta	21J (Delta)	16.9384	good	40	13	0	0	1084	0	28	4	0	372	89189	39	29841	0.960405	false	G210T,C241T,G376A,C3037T,A3126G,G4181T,C6402T,C7124T,C7768T,C8986T,G9053T,C10029T,C10252T,C10894T,A11201G,A11332G,C11572T,C14408T,G15451A,C16466T,C17676T,C19220T,C21618G,T22917G,C22995A,A23403G,C23604G,G24410A,C25469T,G26107C,C26611T,T26767C,A27507C,C27874T,A28461G,G28881T,G28916T,G29402T,C29537T,G29742T	22029-22034,28248-28253,28271			M:T30I,M:I82T,N:D63G,N:R203M,N:G215C,N:D377Y,ORF1a:D954G,ORF1a:A1306S,ORF1a:P2046L,ORF1a:P2287S,ORF1a:V2930L,ORF1a:T3255I,ORF1a:T3646A,ORF1b:P314L,ORF1b:G662S,ORF1b:P1000L,ORF1b:A1918V,ORF3a:S26L,ORF3a:E239Q,ORF7b:T40I,ORF9b:T60A,S:T19R,S:R158G,S:L452R,S:T478K,S:D614G,S:P681R,S:D950N	ORF8:D119-,ORF8:F120-,S:E156-,S:F157-		A21987G		G376A,A3126G,C7768T,C10252T,C10894T,C11572T,C17676T,C26611T,C29537T	1	0	9	10	19298-19315,19329-19551,20070-20086,20096-20120,20234-20447,21163-21192,21207-21232,21236-21283,21329-21338,21352-21366,21737-21968,27539-27612,27626-27691,27706-27791	ORF1b:1944-1950,ORF1b:1954-2028,ORF1b:2201-2207,ORF1b:2210-2218,ORF1b:2256-2327,ORF1b:2566-2575,ORF1b:2580-2606,ORF1b:2621-2624,ORF1b:2629-2633,ORF7a:49-73,ORF7a:78-100,ORF7a:105-122,ORF7b:1-12,S:59-136		3000	29.037	good	1084	10	0
hCoV-19/USA/WI-MHDL-2021110472/2021|EPI_ISL_6861980|2021-11-09	hCoV-19/USA/WI-MHDL-2021110472/2021	EPI_ISL_6861980	2021-11-09	21J	AY.103	B.1.617.2.103	21J	Delta	21J (Delta)	14.0625	good	45	13	0	0	264	0	32	4	0	88	89205	39	29853	0.988229	false	G210T,C241T,C3037T,C3653T,G4181T,C6402T,G6421T,C6896T,C7124T,C8986T,G9053T,C10029T,A11201G,A11332G,C12115T,C14408T,G15451A,C16466T,A17236G,C18261T,C19220T,C21618G,C21637T,G21987A,T22917G,C22995A,A23403G,C23604G,A23989G,C24208T,G24410A,C24734T,C25469T,A25788G,T26767C,T27291C,C27532T,T27638C,C27752T,C27874T,A28461G,G28881T,G28916T,G29402T,G29742T	22029-22034,28248-28253,28271			M:I82T,N:D63G,N:R203M,N:G215C,N:D377Y,ORF1a:L1130F,ORF1a:A1306S,ORF1a:P2046L,ORF1a:P2287S,ORF1a:V2930L,ORF1a:T3255I,ORF1a:T3646A,ORF1b:P314L,ORF1b:G662S,ORF1b:P1000L,ORF1b:I1257V,ORF1b:A1918V,ORF3a:S26L,ORF7a:H47Y,ORF7a:V82A,ORF7a:T120I,ORF7b:T40I,ORF9b:T60A,S:T19R,S:G142D,S:R158G,S:L452R,S:T478K,S:D614G,S:P681R,S:D950N,S:H1058Y	ORF8:D119-,ORF8:F120-,S:E156-,S:F157-			T27291C|21J,C27532T|22B	C3653T,G6421T,C6896T,C12115T,C18261T,C21637T,A23989G,C24734T,A25788G	0	2	9	11	19294-19557	ORF1b:1943-2030		3000	0	good	264	10	0
hCoV-19/USA/WI-MHDL-2021120088/2021|EPI_ISL_7809444|2021-11-09	hCoV-19/USA/WI-MHDL-2021120088/2021	EPI_ISL_7809444	2021-11-09	21J	AY.3	B.1.617.2.3	21J	Delta	21J (Delta)	11.1111	good	43	13	0	0	261	0	33	4	0	88	89078	39	29808	0.986824	false	G210T,C241T,C3037T,G4181T,C6402T,C7124T,C8986T,G9053T,C10029T,A10323G,A11201G,A11332G,A11456G,C14408T,G15181A,G15451A,C16338T,C16466T,C19220T,C20946T,C21618G,T22917G,C22995A,T23284C,A23403G,C23604G,G24410A,C25339T,C25469T,T26767C,T27348C,C27370T,T27638C,C27752T,C27874T,G28300T,A28461G,G28881T,G28916T,G29050A,G29402T,C29509T,G29742T	22029-22034,28248-28253,28271			M:I82T,N:Q9H,N:D63G,N:R203M,N:G215C,N:D377Y,ORF1a:A1306S,ORF1a:P2046L,ORF1a:P2287S,ORF1a:V2930L,ORF1a:T3255I,ORF1a:K3353R,ORF1a:T3646A,ORF1a:I3731V,ORF1b:P314L,ORF1b:A572T,ORF1b:G662S,ORF1b:P1000L,ORF1b:A1918V,ORF3a:S26L,ORF6:P57S,ORF7a:V82A,ORF7a:T120I,ORF7b:T40I,ORF9b:S6I,ORF9b:T60A,S:T19R,S:R158G,S:L452R,S:T478K,S:D614G,S:P681R,S:D950N	ORF8:D119-,ORF8:F120-,S:E156-,S:F157-		A21987G	A10323G|21J&20H	G15181A,C16338T,C20946T,T27348C,C27370T,G28300T	1	1	6	8	19291,19298-19557	ORF1b:1942,ORF1b:1944-2030		3000	0	good	261	10	0
hCoV-19/USA/WI-WSLH-221417/2021|EPI_ISL_6719938|2021-11-09	hCoV-19/USA/WI-WSLH-221417/2021	EPI_ISL_6719938	2021-11-09	21J	AY.25	B.1.617.2.25	21J	Delta	21J (Delta)	2.06818	good	41	13	0	0	492	0	33	4	0	165	89122	55	29836	0.9795	false	G210T,C241T,C1288T,A1389G,C3037T,G4181T,C6286T,C6402T,T6640A,C7124T,G7360A,C8986T,G9053T,C10029T,C10301A,A11201G,A11332G,A13951G,C14408T,G15451A,C16466T,C19220T,C21618G,T22917G,C22995A,A23403G,T23470C,C23604G,G24410A,C25469T,G26107C,T26767C,A27507C,T27638C,C27752T,C27874T,A28461G,G28881T,G28916T,G29402T,G29742T	22029-22034,28248-28253,28271			M:I82T,N:D63G,N:R203M,N:G215C,N:D377Y,ORF1a:N375S,ORF1a:A1306S,ORF1a:P2046L,ORF1a:H2125Q,ORF1a:P2287S,ORF1a:M2365I,ORF1a:V2930L,ORF1a:T3255I,ORF1a:Q3346K,ORF1a:T3646A,ORF1b:I162V,ORF1b:P314L,ORF1b:G662S,ORF1b:P1000L,ORF1b:A1918V,ORF3a:S26L,ORF3a:E239Q,ORF7a:V82A,ORF7a:T120I,ORF7b:T40I,ORF9b:T60A,S:T19R,S:R158G,S:L452R,S:T478K,S:D614G,S:P681R,S:D950N	ORF8:D119-,ORF8:F120-,S:E156-,S:F157-			C6286T|20E	C1288T,A1389G,T6640A,G7360A,C10301A,A13951G,T23470C	0	1	7	8	21717-21990,22325-22542	S:52-143,S:255-327		3000	7.11111	good	492	10	0
hCoV-19/USA/WI-WSLH-221602/2021|EPI_ISL_7263704|2021-11-09	hCoV-19/USA/WI-WSLH-221602/2021	EPI_ISL_7263704	2021-11-09	21J	AY.25	B.1.617.2.25	21J	Delta	21J (Delta)	4.39446	good	37	7	0	0	866	0	27	2	0	292	89164	55	29836	0.966993	false	G210T,C241T,C3037T,G4181T,C6402T,C7124T,C8752T,C8986T,G9053T,C10029T,A11201G,A11332G,C14408T,G15451A,C16466T,G18337T,C18683T,C19220T,C19983T,C20451T,C21618G,A23403G,C23604G,G24410A,C25469T,G26107C,A26759G,T26767C,A27507C,T27638C,C27752T,C27874T,A28461G,G28881T,G28916T,G29402T,G29742T	28248-28253,28271			M:I82T,N:D63G,N:R203M,N:G215C,N:D377Y,ORF1a:A1306S,ORF1a:P2046L,ORF1a:P2287S,ORF1a:V2930L,ORF1a:T3255I,ORF1a:T3646A,ORF1b:P314L,ORF1b:G662S,ORF1b:P1000L,ORF1b:A1624S,ORF1b:T1739I,ORF1b:A1918V,ORF3a:S26L,ORF3a:E239Q,ORF7a:V82A,ORF7a:T120I,ORF7b:T40I,ORF9b:T60A,S:T19R,S:D614G,S:P681R,S:D950N	ORF8:D119-,ORF8:F120-				C8752T,G18337T,C18683T,C19983T,C20451T,A26759G	0	0	6	6	21717-22040,22046-22050,22273-22542,22878-23144	S:52-160,S:162-163,S:237-327,S:439-528		3000	20.963	good	866	10	0
hCoV-19/USA/WI-MHDL-2021110391/2021|EPI_ISL_6945725|2021-11-10	hCoV-19/USA/WI-MHDL-2021110391/2021	EPI_ISL_6945725	2021-11-10	21J	AY.25	B.1.617.2.25	21J	Delta	21J (Delta)	0	good	40	13	0	0	274	0	33	4	0	92	89126	55	29836	0.986791	false	G210T,C241T,A1741G,C3037T,G4181T,C6402T,C7124T,C7488T,C8986T,G9053T,C10029T,A11201G,A11332G,C11396T,C14408T,A14836G,G15451A,C16466T,C19220T,A20533G,C21618G,C22594T,T22917G,C22995A,A23403G,C23604G,G24410A,C25469T,G26107C,T26767C,A27507C,T27638C,C27752T,C27874T,A28461G,G28881T,G28916T,A29381G,G29402T,G29742T	22029-22034,28248-28253,28271			M:I82T,N:D63G,N:R203M,N:G215C,N:K370E,N:D377Y,ORF1a:A1306S,ORF1a:P2046L,ORF1a:P2287S,ORF1a:T2408I,ORF1a:V2930L,ORF1a:T3255I,ORF1a:T3646A,ORF1a:L3711F,ORF1b:P314L,ORF1b:I457V,ORF1b:G662S,ORF1b:P1000L,ORF1b:A1918V,ORF1b:I2356V,ORF3a:S26L,ORF3a:E239Q,ORF7a:V82A,ORF7a:T120I,ORF7b:T40I,ORF9b:T60A,S:T19R,S:R158G,S:L452R,S:T478K,S:D614G,S:P681R,S:D950N	ORF8:D119-,ORF8:F120-,S:E156-,S:F157-				A1741G,C7488T,C11396T,A14836G,A20533G,C22594T,A29381G	0	0	7	7	21717-21990	S:52-143		3000	0	good	274	10	0
hCoV-19/USA/WI-MHDL-2021110453/2021|EPI_ISL_6864926|2021-11-10	hCoV-19/USA/WI-MHDL-2021110453/2021	EPI_ISL_6864926	2021-11-10	21J	AY.100	B.1.617.2.100	21J	Delta	21J (Delta)	11.1111	good	46	14	0	1	260	0	31	5	0	118	89194	39	29854	0.988396	false	G210T,C241T,C3037T,G4181T,C5284T,C5812T,C6402T,C7124T,C8986T,G9053T,A9154G,C9559T,C10029T,A11201G,A11332G,C14408T,C15240T,G15451A,A16275G,C16466T,G17122T,C19220T,G19872T,C21618G,C21846T,G21987A,T22917G,C22995A,A23403G,C23604G,C24064T,G24410A,C25469T,T26767C,T27638C,C27752T,C27874T,A27985T,T28007C,C28432T,A28461G,G28881T,G28916T,G29402T,G29553T,G29742T	22029-22034,27792,28248-28253,28271		ORF7b:14-44	M:I82T,N:D63G,N:R203M,N:G215C,N:D377Y,ORF1a:A1306S,ORF1a:P2046L,ORF1a:P2287S,ORF1a:V2930L,ORF1a:T3255I,ORF1a:T3646A,ORF1b:P314L,ORF1b:G662S,ORF1b:P1000L,ORF1b:A1219S,ORF1b:A1918V,ORF3a:S26L,ORF7a:V82A,ORF7a:T120I,ORF8:Y31F,ORF9b:S50L,ORF9b:T60A,S:T19R,S:T95I,S:G142D,S:R158G,S:L452R,S:T478K,S:D614G,S:P681R,S:D950N	ORF7b:F13-,ORF8:D119-,ORF8:F120-,S:E156-,S:F157-			C5284T|22B,C28432T|21J	C5812T,A9154G,A16275G,G19872T,C24064T,A27985T,G29553T	0	2	7	9	19294-19553	ORF1b:1943-2029,ORF7b:14-44		3000	0	good	260	10	0
hCoV-19/USA/WI-MHDL-2021110454/2021|EPI_ISL_6861963|2021-11-10	hCoV-19/USA/WI-MHDL-2021110454/2021	EPI_ISL_6861963	2021-11-10	21J	AY.39	B.1.617.2.39	21J	Delta	21J (Delta)	17.3611	good	50	13	0	0	259	0	40	4	0	87	89218	31	29856	0.988764	false	G210T,C241T,G2231T,G2946A,C3037T,C3261T,G3304T,G3433T,G4181T,C6402T,C7124T,C8655T,G8849A,C8986T,G9053T,C10029T,A11201G,A11332G,A12916G,G12917A,T13929C,G14118A,C14408T,G15451A,C16323T,C16466T,C17339T,C19220T,G21372T,C21618G,C21846T,G21987A,T22917G,C22995A,A23403G,C23604G,G24410A,G24882A,C25469T,T26767C,G27604A,T27638C,C27654T,C27752T,C27874T,A28461G,G28881T,G28916T,G29402T,G29742T	22029-22034,28248-28253,28271			M:I82T,N:D63G,N:R203M,N:G215C,N:D377Y,ORF1a:A656S,ORF1a:G894D,ORF1a:T999I,ORF1a:E1013D,ORF1a:A1306S,ORF1a:P2046L,ORF1a:P2287S,ORF1a:S2797F,ORF1a:V2862M,ORF1a:V2930L,ORF1a:T3255I,ORF1a:T3646A,ORF1a:D4218N,ORF1b:P314L,ORF1b:G662S,ORF1b:P1000L,ORF1b:A1291V,ORF1b:A1918V,ORF1b:Q2635H,ORF3a:S26L,ORF7a:V71I,ORF7a:V82A,ORF7a:T120I,ORF7b:T40I,ORF9b:T60A,S:T19R,S:T95I,S:G142D,S:R158G,S:L452R,S:T478K,S:D614…	ORF8:D119-,ORF8:F120-,S:E156-,S:F157-			C17339T|21E	G2231T,G2946A,C3261T,G3304T,G3433T,C8655T,G8849A,A12916G,G12917A,T13929C,G14118A,C16323T,G24882A,C27654T	0	1	14	15	19293-19551	ORF1b:1942-2028		3000	0	good	259	10	0
hCoV-19/USA/WI-MHDL-2021110455/2021|EPI_ISL_6861964|2021-11-10	hCoV-19/USA/WI-MHDL-2021110455/2021	EPI_ISL_6861964	2021-11-10	21I	AY.47	B.1.617.2.47	21I	Delta	21I (Delta)	0.173611	good	42	13	0	0	64	0	32	4	0	23	89214	40	29853	0.994883	false	G210T,C241T,C920T,C1684T,C3037T,C5144T,G5164T,C5184T,A5584G,C9891T,G10265T,T11418C,C11514T,C11776T,C12049T,C13019T,C13965T,C14408T,G15451A,A15604G,C16466T,A21405G,C21618G,G21987A,C22227T,G22427A,T22917G,C22995A,A23403G,C23604G,G24410A,C25469T,G26065A,T26767C,T27638C,C27752T,C28236T,G28326T,A28461G,G28881T,G29402T,G29742T	22029-22034,28248-28253,28271			M:I82T,N:G18V,N:D63G,N:R203M,N:D377Y,ORF1a:E1633D,ORF1a:P1640L,ORF1a:A3209V,ORF1a:G3334C,ORF1a:V3718A,ORF1a:T3750I,ORF1b:P314L,ORF1b:G662S,ORF1b:N713D,ORF1b:P1000L,ORF3a:S26L,ORF3a:V225I,ORF7a:V82A,ORF7a:T120I,ORF8:R115C,ORF9b:V15L,ORF9b:T60A,S:T19R,S:G142D,S:R158G,S:A222V,S:V289I,S:L452R,S:T478K,S:D614G,S:P681R,S:D950N	ORF8:D119-,ORF8:F120-,S:E156-,S:F157-				C920T,C5144T,G10265T,C11776T,C13965T,A15604G,A21405G,G26065A,C28236T	0	0	9	9	19298-19300,19497-19557	ORF1b:1944-1945,ORF1b:2010-2030		3000	0	good	64	10	0
hCoV-19/USA/WI-MHDL-2021110456/2021|EPI_ISL_6861965|2021-11-10	hCoV-19/USA/WI-MHDL-2021110456/2021	EPI_ISL_6861965	2021-11-10	21J	AY.103	B.1.617.2.103	21J	Delta	21J (Delta)	0.744705	good	41	13	0	0	533	0	33	4	0	178	89224	39	29854	0.979266	false	G210T,C241T,G1857A,G3004A,C3037T,G4181T,C6402T,C7124T,C8986T,G9053T,C10029T,C11003T,A11201G,A11332G,C14408T,A15033T,G15451A,C16466T,A17236G,C19220T,C21077T,C21618G,G21987A,T22917G,C22995A,A23403G,C23604G,C24208T,G24410A,G24794T,C25469T,G25522A,C25603T,T26767C,C27752T,C27874T,A28461G,G28881T,G28916T,G29402T,G29742T	22029-22034,28248-28253,28271			M:I82T,N:D63G,N:R203M,N:G215C,N:D377Y,ORF1a:S531N,ORF1a:A1306S,ORF1a:P2046L,ORF1a:P2287S,ORF1a:V2930L,ORF1a:T3255I,ORF1a:H3580Y,ORF1a:T3646A,ORF1b:P314L,ORF1b:G662S,ORF1b:P1000L,ORF1b:I1257V,ORF1b:A1918V,ORF1b:T2537I,ORF3a:S26L,ORF3a:G44R,ORF7a:T120I,ORF7b:T40I,ORF9b:T60A,S:T19R,S:G142D,S:R158G,S:L452R,S:T478K,S:D614G,S:P681R,S:D950N,S:A1078S	ORF8:D119-,ORF8:F120-,S:E156-,S:F157-				G1857A,G3004A,C11003T,A15033T,C21077T,G24794T,G25522A,C25603T	0	0	8	8	19298-19556,27393-27666	ORF1b:1944-2030,ORF7a:1-91		3000	8.62963	good	533	10	0
hCoV-19/USA/WI-MHDL-2021120089/2021|EPI_ISL_7809445|2021-11-10	hCoV-19/USA/WI-MHDL-2021120089/2021	EPI_ISL_7809445	2021-11-10	21J	AY.103	B.1.617.2.103	21J	Delta	21J (Delta)	25	good	45	13	0	0	48	0	36	4	0	18	89232	31	29854	0.995753	false	G210T,C241T,C3037T,G4181T,T6294C,C6402T,T6661C,C7124T,C7926T,C8986T,G9053T,A9437G,C10029T,A11201G,A11332G,C14408T,G15451A,C16466T,A17236G,C19220T,C20234T,C20736T,C21618G,G21987A,T22917G,C22995A,C23202T,A23403G,C23604G,C24208T,G24410A,G25429T,C25469T,T26767C,T27291C,T27638C,C27752T,C27874T,A28461G,G28881T,G28916T,G29024T,G29260T,G29402T,G29742T	22029-22034,28248-28253,28271			M:I82T,N:D63G,N:R203M,N:G215C,N:A251S,N:D377Y,ORF1a:A1306S,ORF1a:I2010T,ORF1a:P2046L,ORF1a:P2287S,ORF1a:A2554V,ORF1a:V2930L,ORF1a:T3058A,ORF1a:T3255I,ORF1a:T3646A,ORF1b:P314L,ORF1b:G662S,ORF1b:P1000L,ORF1b:I1257V,ORF1b:A1918V,ORF1b:P2256L,ORF3a:V13L,ORF3a:S26L,ORF7a:V82A,ORF7a:T120I,ORF7b:T40I,ORF9b:T60A,S:T19R,S:G142D,S:R158G,S:L452R,S:T478K,S:T547I,S:D614G,S:P681R,S:D950N	ORF8:D119-,ORF8:F120-,S:E156-,S:F157-			C7926T|21J&21K,C23202T|23B,T27291C|21J	T6294C,T6661C,A9437G,C20234T,C20736T,G25429T,G29024T,G29260T	0	3	8	11	19452-19454,19464-19508	ORF1b:1995-1996,ORF1b:1999-2014		3000	0	good	48	10	0
hCoV-19/USA/WI-WSLH-221601/2021|EPI_ISL_7263703|2021-11-10	hCoV-19/USA/WI-WSLH-221601/2021	EPI_ISL_7263703	2021-11-10	21J	AY.25	B.1.617.2.25	21J	Delta	21J (Delta)	9.01262	good	39	13	0	0	492	0	32	4	0	165	89130	55	29836	0.9795	false	G210T,C241T,C3037T,G4181T,C6402T,C7124T,C8986T,G9053T,C10029T,A11201G,A11332G,G12801A,C14408T,G15451A,A15775G,C16466T,C17550T,C18029T,C19220T,A21137G,C21618G,G22801T,T22917G,C22995A,A23403G,C23604G,G24410A,C25469T,G26107C,T26767C,A27507C,T27638C,C27752T,C27874T,A28461G,G28881T,G28916T,G29402T,G29742T	22029-22034,28248-28253,28271			M:I82T,N:D63G,N:R203M,N:G215C,N:D377Y,ORF1a:A1306S,ORF1a:P2046L,ORF1a:P2287S,ORF1a:V2930L,ORF1a:T3255I,ORF1a:T3646A,ORF1a:R4179K,ORF1b:P314L,ORF1b:G662S,ORF1b:I770V,ORF1b:P1000L,ORF1b:A1521V,ORF1b:A1918V,ORF1b:K2557R,ORF3a:S26L,ORF3a:E239Q,ORF7a:V82A,ORF7a:T120I,ORF7b:T40I,ORF9b:T60A,S:T19R,S:R158G,S:L452R,S:T478K,S:D614G,S:P681R,S:D950N	ORF8:D119-,ORF8:F120-,S:E156-,S:F157-			G12801A|21J,A21137G|21J&21D,G22801T|21J	A15775G,C17550T,C18029T	0	3	3	6	21717-21990,22325-22542	S:52-143,S:255-327		3000	7.11111	good	492	10	0
hCoV-19/USA/WI-WSLH-221707/2021|EPI_ISL_7951135|2021-11-10	hCoV-19/USA/WI-WSLH-221707/2021	EPI_ISL_7951135	2021-11-10	21J	AY.103	B.1.617.2.103	21J	Delta	21J (Delta)	6.91495	good	37	7	0	0	1010	0	27	2	0	343	89164	55	29836	0.962178	false	G210T,C241T,C3037T,G4181T,C6402T,G6421T,C7124T,C7420T,C8986T,G9053T,C10029T,A11201G,A11332G,C14408T,G15451A,C16466T,A17236G,C19220T,C21618G,C22995A,G23282T,A23403G,T23569C,C23604G,C24208T,G24410A,C25469T,T26767C,T27291C,T27638C,C27752T,C27874T,A28461G,G28881T,G28916T,G29402T,G29742T	28248-28253,28271			M:I82T,N:D63G,N:R203M,N:G215C,N:D377Y,ORF1a:A1306S,ORF1a:P2046L,ORF1a:P2287S,ORF1a:V2930L,ORF1a:T3255I,ORF1a:T3646A,ORF1b:P314L,ORF1b:G662S,ORF1b:P1000L,ORF1b:I1257V,ORF1b:A1918V,ORF3a:S26L,ORF7a:V82A,ORF7a:T120I,ORF7b:T40I,ORF9b:T60A,S:T19R,S:T478K,S:D574Y,S:D614G,S:P681R,S:D950N	ORF8:D119-,ORF8:F120-			T27291C|21J	G6421T,C7420T,G23282T,T23569C	0	1	4	5	19276-19575,20490-20496,21717-22037,22297-22542,22878-22895,22911-22935,22939-22940,23054-23144	ORF1b:1937-2036,ORF1b:2341-2343,S:52-159,S:245-327,S:439-445,S:450-460,S:498-528		3000	26.2963	good	1010	10	0
hCoV-19/USA/WI-WSLH-221731/2021|EPI_ISL_7951159|2021-11-10	hCoV-19/USA/WI-WSLH-221731/2021	EPI_ISL_7951159	2021-11-10	21J	AY.103	B.1.617.2.103	21J	Delta	21J (Delta)	18.1729	good	37	13	0	0	1451	0	29	4	0	483	89138	55	29836	0.94743	false	G210T,C241T,G1857A,G3004A,C3037T,G4181T,C6402T,C7124T,C8986T,G9053T,C10029T,C11003T,A11201G,A11332G,C14408T,A15033T,G15451A,C16466T,A17236G,C19220T,C21077T,C21618G,A23403G,C23604G,C24208T,G24410A,G24794T,C25469T,G25522A,C25603T,T26767C,C27874T,A28461G,G28881T,G28916T,G29402T,G29742T	22029-22034,28248-28253,28271			M:I82T,N:D63G,N:R203M,N:G215C,N:D377Y,ORF1a:S531N,ORF1a:A1306S,ORF1a:P2046L,ORF1a:P2287S,ORF1a:V2930L,ORF1a:T3255I,ORF1a:H3580Y,ORF1a:T3646A,ORF1b:P314L,ORF1b:G662S,ORF1b:P1000L,ORF1b:I1257V,ORF1b:A1918V,ORF1b:T2537I,ORF3a:S26L,ORF3a:G44R,ORF7b:T40I,ORF9b:T60A,S:T19R,S:R158G,S:D614G,S:P681R,S:D950N,S:A1078S	ORF8:D119-,ORF8:F120-,S:E156-,S:F157-				G1857A,G3004A,C11003T,A15033T,C21077T,G24794T,G25522A,C25603T	0	0	8	8	8636-8641,21717-22006,22273-22542,22878-23144,27191-27808	M:223,ORF1a:2791-2792,ORF6:1-62,ORF7a:1-122,ORF7b:1-18,S:52-148,S:237-327,S:439-528		3000	42.6296	mediocre	1451	10	0
hCoV-19/USA/WI-MHDL-2021110480/2021|EPI_ISL_6861988|2021-11-11	hCoV-19/USA/WI-MHDL-2021110480/2021	EPI_ISL_6861988	2021-11-11	21J	AY.103	B.1.617.2.103	21J	Delta	21J (Delta)	0	good	39	13	0	0	255	0	30	4	0	86	89229	39	29853	0.98853	false	G210T,C241T,T2827C,C3037T,G4181T,C6402T,C7124T,C8986T,G9053T,C10029T,A11201G,A11332G,C11572T,C12624A,C14408T,G15451A,C16466T,A17236G,C19220T,C21618G,G21987A,T21994C,T22917G,C22995A,A23403G,C23604G,C24208T,G24410A,C25469T,T26767C,T27291C,T27638C,C27752T,C27874T,A28461G,G28881T,G28916T,G29402T,G29742T	22029-22034,28248-28253,28271			M:I82T,N:D63G,N:R203M,N:G215C,N:D377Y,ORF1a:A1306S,ORF1a:P2046L,ORF1a:P2287S,ORF1a:V2930L,ORF1a:T3255I,ORF1a:T3646A,ORF1a:P4120H,ORF1b:P314L,ORF1b:G662S,ORF1b:P1000L,ORF1b:I1257V,ORF1b:A1918V,ORF3a:S26L,ORF7a:V82A,ORF7a:T120I,ORF7b:T40I,ORF9b:T60A,S:T19R,S:G142D,S:R158G,S:L452R,S:T478K,S:D614G,S:P681R,S:D950N	ORF8:D119-,ORF8:F120-,S:E156-,S:F157-			T27291C|21J	T2827C,C11572T,C12624A,T21994C	0	1	4	5	19293-19317,19327-19556	ORF1b:1942-1950,ORF1b:1954-2030		3000	0	good	255	10	0
hCoV-19/USA/WI-MHDL-2021110481/2021|EPI_ISL_6861989|2021-11-11	hCoV-19/USA/WI-MHDL-2021110481/2021	EPI_ISL_6861989	2021-11-11	21J	AY.3	B.1.617.2.3	21J	Delta	21J (Delta)	0	good	39	13	0	0	260	0	31	4	0	87	88731	39	29687	0.982811	false	G210T,C241T,C3037T,G4181T,C4686T,C6402T,C7124T,C8986T,G9053T,C10029T,A11201G,A11332G,A11456G,C14408T,G15451A,C16466T,C16954T,T16986C,C19220T,C21618G,G21987A,T22917G,C22995A,A23403G,C23604G,G24410A,A25223G,C25469T,T25686A,T26767C,T27638C,C27752T,C27874T,A28461G,G28881T,G28916T,G29050A,G29402T,C29509T	22029-22034,28248-28253,28271			M:I82T,N:D63G,N:R203M,N:G215C,N:D377Y,ORF1a:A1306S,ORF1a:T1474I,ORF1a:P2046L,ORF1a:P2287S,ORF1a:V2930L,ORF1a:T3255I,ORF1a:T3646A,ORF1a:I3731V,ORF1b:P314L,ORF1b:G662S,ORF1b:P1000L,ORF1b:A1918V,ORF3a:S26L,ORF7a:V82A,ORF7a:T120I,ORF7b:T40I,ORF9b:T60A,S:T19R,S:G142D,S:R158G,S:L452R,S:T478K,S:D614G,S:P681R,S:D950N,S:I1221V	ORF8:D119-,ORF8:F120-,S:E156-,S:F157-				C4686T,C16954T,T16986C,A25223G,T25686A	0	0	5	5	19294-19553	ORF1b:1943-2029		3000	0	good	260	10	0
hCoV-19/USA/WI-MHDL-2021110482/2021|EPI_ISL_6861990|2021-11-11	hCoV-19/USA/WI-MHDL-2021110482/2021	EPI_ISL_6861990	2021-11-11	21J	AY.39	B.1.617.2.39	21J	Delta	21J (Delta)	17.3611	good	39	13	0	0	260	0	31	4	0	87	89229	37	29851	0.988362	false	G210T,C241T,C337T,C3037T,G3304T,G3433T,G3692T,G4181T,C6402T,C7124T,C8986T,G9053T,C10029T,A11201G,A11332G,C14408T,G15451A,C16466T,A16644G,C19220T,G21372T,C21618G,T22057C,T22917G,C22995A,A23403G,C23604G,G24410A,C25469T,T26767C,G27604A,T27638C,C27752T,C27874T,A28461G,G28881T,G28916T,G29402T,G29742T	22029-22034,28248-28253,28271			M:I82T,N:D63G,N:R203M,N:G215C,N:D377Y,ORF1a:E1013D,ORF1a:V1143F,ORF1a:A1306S,ORF1a:P2046L,ORF1a:P2287S,ORF1a:V2930L,ORF1a:T3255I,ORF1a:T3646A,ORF1b:P314L,ORF1b:G662S,ORF1b:P1000L,ORF1b:A1918V,ORF1b:Q2635H,ORF3a:S26L,ORF7a:V71I,ORF7a:V82A,ORF7a:T120I,ORF7b:T40I,ORF9b:T60A,S:T19R,S:R158G,S:L452R,S:T478K,S:D614G,S:P681R,S:D950N	ORF8:D119-,ORF8:F120-,S:E156-,S:F157-		T21846C,A21987G		C337T,G3304T,G3433T,G3692T,A16644G,T22057C	2	0	6	8	19294-19553	ORF1b:1943-2029		3000	0	good	260	10	0
hCoV-19/USA/WI-MHDL-2021110485/2021|EPI_ISL_6861993|2021-11-11	hCoV-19/USA/WI-MHDL-2021110485/2021	EPI_ISL_6861993	2021-11-11	21J	AY.44	B.1.617.2.44	21J	Delta	21J (Delta)	14.0625	good	46	13	0	0	258	0	36	4	0	86	89231	31	29855	0.988764	false	G210T,C241T,C3037T,T3268C,G4181T,C6040T,C6402T,C7124T,C7926T,C8986T,G9053T,C10029T,A10323G,A11201G,A11332G,T14014G,C14408T,C14697T,G15451A,C16466T,G17964T,A18077G,C19220T,C21618G,G21987A,T22917G,C22995A,A23403G,C23604G,G24410A,C25469T,G25538T,C25821T,C26085T,A26435G,T26767C,T27638C,C27752T,C27874T,G28198A,A28461G,G28881T,G28916T,G29402T,A29700G,G29742T	22029-22034,28248-28253,28271			E:N64S,M:I82T,N:D63G,N:R203M,N:G215C,N:D377Y,ORF1a:A1306S,ORF1a:P2046L,ORF1a:P2287S,ORF1a:A2554V,ORF1a:V2930L,ORF1a:T3255I,ORF1a:K3353R,ORF1a:T3646A,ORF1b:F183V,ORF1b:P314L,ORF1b:G662S,ORF1b:P1000L,ORF1b:M1499I,ORF1b:K1537R,ORF1b:A1918V,ORF3a:S26L,ORF3a:G49V,ORF7a:V82A,ORF7a:T120I,ORF7b:T40I,ORF8:C102Y,ORF9b:T60A,S:T19R,S:G142D,S:R158G,S:L452R,S:T478K,S:D614G,S:P681R,S:D950N	ORF8:D119-,ORF8:F120-,S:E156-,S:F157-			C7926T|21J&21K,A10323G|21J&20H	T3268C,C14697T,G17964T,A18077G,G25538T,C25821T,C26085T,A26435G,G28198A	0	2	9	11	19294-19551	ORF1b:1943-2028		3000	0	good	258	10	0
hCoV-19/USA/WI-WSLH-221596/2021|EPI_ISL_7263698|2021-11-11	hCoV-19/USA/WI-WSLH-221596/2021	EPI_ISL_7263698	2021-11-11	21I	B.1.617.2	B.1.617.2	21I	Delta	21I (Delta)	5.83361	good	36	7	0	0	858	0	26	2	0	289	89168	55	29836	0.967261	false	G210T,C241T,C3037T,C4331T,C5184T,A5584G,C6449T,C9430T,C9891T,G11335T,T11418C,C11514T,C11564T,C12885T,C13019T,G13445A,G13960A,C14408T,G15451A,C16466T,T18876C,C21618G,C22227T,A23403G,C23604G,G24410A,C25469T,C26447T,T26767C,T27638C,C27752T,A28461G,C28606T,G28881T,G29402T,G29742T	28248-28253,28271			E:S68F,M:I82T,N:D63G,N:R203M,N:D377Y,ORF1a:P1640L,ORF1a:L2062F,ORF1a:A3209V,ORF1a:V3718A,ORF1a:T3750I,ORF1a:P3767S,ORF1a:T4207I,ORF1a:A4394T,ORF1b:V165I,ORF1b:P314L,ORF1b:G662S,ORF1b:P1000L,ORF3a:S26L,ORF7a:V82A,ORF7a:T120I,ORF9b:T60A,S:T19R,S:A222V,S:D614G,S:P681R,S:D950N	ORF8:D119-,ORF8:F120-				C4331T,C6449T,C9430T,G11335T,C11564T,C12885T,G13445A,G13960A,T18876C,C26447T,C28606T	0	0	11	11	11885-11889,21717-22040,22281-22542,22878-23144	ORF1a:3874-3875,S:52-160,S:240-327,S:439-528		3000	20.6667	good	858	10	0
hCoV-19/USA/WI-WSLH-221597/2021|EPI_ISL_7263699|2021-11-11	hCoV-19/USA/WI-WSLH-221597/2021	EPI_ISL_7263699	2021-11-11	21J	AY.25.1	B.1.617.2.25.1	21J	Delta	21J (Delta)	46.4417	mediocre	36	7	0	0	2140	0	30	2	0	731	89024	103	29836	0.922784	false	G210T,C241T,G2564A,C3037T,A3948G,G4181T,C6402T,C7124T,C8986T,G9053T,C10029T,A11201G,A11332G,G11562T,C14408T,G15451A,C16466T,C19220T,C21034T,C21618G,A23403G,C23604G,G24410A,C25469T,T25706C,G26107C,T26767C,A27507C,T27638C,C27752T,T27802G,A28461G,G28881T,G28916T,G29402T,G29742T	28248-28253,28271			M:I82T,N:D63G,N:R203M,N:G215C,N:D377Y,ORF1a:E767K,ORF1a:D1228G,ORF1a:A1306S,ORF1a:P2046L,ORF1a:P2287S,ORF1a:V2930L,ORF1a:T3255I,ORF1a:T3646A,ORF1a:C3766F,ORF1b:P314L,ORF1b:G662S,ORF1b:P1000L,ORF1b:A1918V,ORF1b:L2523F,ORF3a:S26L,ORF3a:F105S,ORF3a:E239Q,ORF7a:V82A,ORF7a:T120I,ORF7b:F16C,ORF9b:T60A,S:T19R,S:D614G,S:P681R,S:D950N	ORF8:D119-,ORF8:F120-				G2564A,C21034T,T25706C,T27802G	0	0	4	4	654-664,1943-2064,2072-2207,3795,8636-8689,8893-8913,9558-9594,9772-9806,9814-9833,9835-9849,10738-10740,11013-11022,13364-13396,17973-17993,19912-19946,20111-20125,20129-20203,20206-20208,20216-20247,20487-20496,21428-21430,21717-22556,22878-23144,23823-23836,26891-26899,27146-27164,27812-28104,29002-29007	M:123-126,M:208-214,N:243-245,ORF1a:130-133,ORF1a:560-600,ORF1a:603-648,ORF1a:1177,ORF1a:2791-2808,ORF1a:2876-2883,ORF1a:3098-3110,ORF1a:3169-3181,ORF1a:3183-3195,ORF1a:3491-3492,ORF1a:3583-3586,ORF1a:4367-4377,ORF1b:1502-1509,ORF1b:2149-2160,ORF1b:2215-2247,ORF1b:2250-2260,ORF1b:2340-2343,ORF1b:2654-2655,ORF7b:19-44,ORF8:1-71,S:52-332,S:439-528,S:754-758		3000	68.1481	mediocre	2140	10	0
hCoV-19/USA/WI-ASU23771/2021|EPI_ISL_6963442|2021-11-12	hCoV-19/USA/WI-ASU23771/2021	EPI_ISL_6963442	2021-11-12	21J	AY.39	B.1.617.2.39	21J	Delta	21J (Delta)	1.37346	good	43	13	0	0	465	1	36	4	0	159	89102	50	29827	0.980236	false	G210T,C241T,C3037T,G4181T,C5512T,C5724T,C6402T,T6430C,C7124T,C8986T,G9053T,C10029T,A11201G,A11332G,T13339C,C13994T,C14408T,G15451A,A16162G,C16466T,C19220T,G21372T,C21618G,C21846T,G21987A,T22917G,C22995A,A23403G,C23475T,C23604G,G24410A,G25429T,C25469T,T26767C,G27604A,T27638C,C27752T,C27874T,A28461G,G28881T,G28916T,G29402T,G29742T	22029-22034,28248-28253,28271			M:I82T,N:D63G,N:R203M,N:G215C,N:D377Y,ORF1a:A1306S,ORF1a:T1820I,ORF1a:P2046L,ORF1a:P2287S,ORF1a:V2930L,ORF1a:T3255I,ORF1a:T3646A,ORF1b:A176V,ORF1b:P314L,ORF1b:G662S,ORF1b:T899A,ORF1b:P1000L,ORF1b:A1918V,ORF1b:Q2635H,ORF3a:V13L,ORF3a:S26L,ORF7a:V71I,ORF7a:V82A,ORF7a:T120I,ORF7b:T40I,ORF9b:T60A,S:T19R,S:T95I,S:G142D,S:R158G,S:L452R,S:T478K,S:D614G,S:T638I,S:P681R,S:D950N	ORF8:D119-,ORF8:F120-,S:E156-,S:F157-				C5512T,C5724T,T6430C,T13339C,C13994T,A16162G,C23475T,G25429T	0	0	8	8	6860-7084,21117-21193,21197-21316,22248-22280,22282-22291	ORF1a:2199-2273,ORF1b:2550-2617,S:229-243,S:688	Y:23625	3000	6.11111	good	465	10	10
hCoV-19/USA/WI-MHDL-2021110335/2021|EPI_ISL_6571153|2021-11-12	hCoV-19/USA/WI-MHDL-2021110335/2021	EPI_ISL_6571153	2021-11-12	21J	AY.25.1	B.1.617.2.25.1	21J	Delta	21J (Delta)	0	good	42	13	0	0	0	0	36	4	0	0	89118	55	29836	0.995954	false	G210T,C241T,A2172C,C3037T,A3948G,G4181T,C6402T,C7124T,C7834T,A8621G,C8986T,G9053T,C10029T,A11201G,A11332G,G11562T,C14408T,A14487T,G15451A,C16466T,C19220T,C21618G,G21987A,G22335T,T22917G,C22995A,C23277T,A23403G,C23604G,G24410A,C25469T,G26107C,T26767C,A27507C,T27638C,C27752T,C27874T,A28461G,G28881T,G28916T,G29402T,G29742T	22029-22034,28248-28253,28271			M:I82T,N:D63G,N:R203M,N:G215C,N:D377Y,ORF1a:K636T,ORF1a:D1228G,ORF1a:A1306S,ORF1a:P2046L,ORF1a:P2287S,ORF1a:I2786V,ORF1a:V2930L,ORF1a:T3255I,ORF1a:T3646A,ORF1a:C3766F,ORF1b:P314L,ORF1b:R340S,ORF1b:G662S,ORF1b:P1000L,ORF1b:A1918V,ORF3a:S26L,ORF3a:E239Q,ORF7a:V82A,ORF7a:T120I,ORF7b:T40I,ORF9b:T60A,S:T19R,S:G142D,S:R158G,S:W258L,S:L452R,S:T478K,S:T572I,S:D614G,S:P681R,S:D950N	ORF8:D119-,ORF8:F120-,S:E156-,S:F157-				A2172C,C7834T,A8621G,A14487T,G22335T,C23277T	0	0	6	6				3000	0	good	0	10	0
hCoV-19/USA/WI-MHDL-2021110336/2021|EPI_ISL_6571154|2021-11-12	hCoV-19/USA/WI-MHDL-2021110336/2021	EPI_ISL_6571154	2021-11-12	21J	AY.119.2	B.1.617.2.119.2	21J	Delta	21J (Delta)	6.71874	good	41	13	0	0	836	0	32	4	0	281	89122	55	29836	0.967997	false	G210T,C241T,C3037T,C3241T,G4181T,C4327T,C6402T,T6853C,C7124T,C8829T,C8986T,G9053T,C10029T,A11201G,A11332G,C12005T,G12911T,C14408T,A15435G,G15451A,C16466T,G19006T,C19220T,A21512C,C21618G,A23403G,G23587C,C23604G,G24410A,G24977T,C25469T,T26767C,T27638C,C27752T,C27874T,G28086T,A28461G,G28881T,G28916T,G29402T,G29742T	22029-22034,28248-28253,28271			M:I82T,N:D63G,N:R203M,N:G215C,N:D377Y,ORF1a:A1306S,ORF1a:P2046L,ORF1a:P2287S,ORF1a:A2855V,ORF1a:V2930L,ORF1a:T3255I,ORF1a:T3646A,ORF1a:V4216F,ORF1b:P314L,ORF1b:G662S,ORF1b:P1000L,ORF1b:A1847S,ORF1b:A1918V,ORF1b:N2682T,ORF3a:S26L,ORF7a:V82A,ORF7a:T120I,ORF7b:T40I,ORF8:A65S,ORF9b:T60A,S:T19R,S:R158G,S:D614G,S:Q675H,S:P681R,S:D950N,S:D1139Y	ORF8:D119-,ORF8:F120-,S:E156-,S:F157-			C3241T|21K	C4327T,T6853C,C12005T,G12911T,A15435G,A21512C,G24977T,G28086T	0	1	8	9	19276-19570,21717-21990,22878-23144	ORF1b:1937-2035,S:52-143,S:439-528		3000	19.8519	good	836	10	0
hCoV-19/USA/WI-MHDL-2021110473/2021|EPI_ISL_6861981|2021-11-12	hCoV-19/USA/WI-MHDL-2021110473/2021	EPI_ISL_6861981	2021-11-12	21J	AY.103	B.1.617.2.103	21J	Delta	21J (Delta)	0	good	39	13	0	0	254	0	31	4	0	85	89232	39	29854	0.988596	false	G210T,C241T,G702T,C884T,C3037T,G4181T,C6402T,G6421T,C7124T,C8986T,G9053T,C10029T,A11201G,A11332G,C14408T,G15451A,C16466T,A17236G,C19220T,C21618G,G21987A,T22917G,C22995A,A23403G,C23604G,C24208T,G24410A,C25469T,G25494T,T26767C,T27291C,T27638C,C27752T,C27874T,A28461G,G28881T,G28916T,G29402T,G29742T	22029-22034,28248-28253,28271			M:I82T,N:D63G,N:R203M,N:G215C,N:D377Y,ORF1a:G146V,ORF1a:R207C,ORF1a:A1306S,ORF1a:P2046L,ORF1a:P2287S,ORF1a:V2930L,ORF1a:T3255I,ORF1a:T3646A,ORF1b:P314L,ORF1b:G662S,ORF1b:P1000L,ORF1b:I1257V,ORF1b:A1918V,ORF3a:S26L,ORF7a:V82A,ORF7a:T120I,ORF7b:T40I,ORF9b:T60A,S:T19R,S:G142D,S:R158G,S:L452R,S:T478K,S:D614G,S:P681R,S:D950N	ORF8:D119-,ORF8:F120-,S:E156-,S:F157-			T27291C|21J	G702T,C884T,G6421T,G25494T	0	1	4	5	19298-19551	ORF1b:1944-2028		3000	0	good	254	10	0
hCoV-19/USA/WI-MHDL-2021110474/2021|EPI_ISL_6861982|2021-11-12	hCoV-19/USA/WI-MHDL-2021110474/2021	EPI_ISL_6861982	2021-11-12	21J	AY.103	B.1.617.2.103	21J	Delta	21J (Delta)	0	good	38	13	0	0	265	0	30	4	0	89	89260	31	29854	0.988496	false	G210T,C241T,G702T,C3037T,G4181T,C6402T,G6421T,C7124T,C8986T,G9053T,C10029T,A11201G,A11332G,C14408T,G15451A,C16466T,A17236G,C19220T,C21618G,G21987A,T22917G,C22995A,A23403G,C23604G,C24208T,G24410A,C25469T,G25494T,T26767C,T27291C,T27638C,C27752T,C27874T,A28461G,G28881T,G28916T,G29402T,G29742T	22029-22034,28248-28253,28271			M:I82T,N:D63G,N:R203M,N:G215C,N:D377Y,ORF1a:G146V,ORF1a:A1306S,ORF1a:P2046L,ORF1a:P2287S,ORF1a:V2930L,ORF1a:T3255I,ORF1a:T3646A,ORF1b:P314L,ORF1b:G662S,ORF1b:P1000L,ORF1b:I1257V,ORF1b:A1918V,ORF3a:S26L,ORF7a:V82A,ORF7a:T120I,ORF7b:T40I,ORF9b:T60A,S:T19R,S:G142D,S:R158G,S:L452R,S:T478K,S:D614G,S:P681R,S:D950N	ORF8:D119-,ORF8:F120-,S:E156-,S:F157-			T27291C|21J	G702T,G6421T,G25494T	0	1	3	4	19293-19557	ORF1b:1942-2030		3000	0	good	265	10	0
hCoV-19/USA/WI-MHDL-2021110484/2021|EPI_ISL_6861992|2021-11-12	hCoV-19/USA/WI-MHDL-2021110484/2021	EPI_ISL_6861992	2021-11-12	21J	AY.103	B.1.617.2.103	21J	Delta	21J (Delta)	11.1111	good	47	13	0	0	265	0	35	4	0	89	89200	39	29854	0.988229	false	G210T,C241T,C1385T,C3037T,G4181T,A5608G,C6402T,C7124T,C7644T,C8986T,G9053T,T9877C,C10029T,C11200T,A11201G,A11332G,A11781G,C14408T,G15451A,C16466T,G17058T,A17236G,C19220T,C20031T,C21618G,G21987A,A22623C,T22917G,C22995A,A23403G,C23604G,C24130T,C24208T,G24410A,C25469T,T26711C,T26767C,C27223G,T27638C,C27752T,C27874T,A28461G,G28881T,T28888C,G28916T,G29402T,G29742T	22029-22034,28248-28253,28271			M:I82T,N:D63G,N:R203M,N:G215C,N:D377Y,ORF1a:H374Y,ORF1a:A1306S,ORF1a:P2046L,ORF1a:P2287S,ORF1a:A2460V,ORF1a:V2930L,ORF1a:T3255I,ORF1a:T3646A,ORF1a:K3839R,ORF1b:P314L,ORF1b:G662S,ORF1b:P1000L,ORF1b:M1197I,ORF1b:I1257V,ORF1b:A1918V,ORF3a:S26L,ORF6:Q8E,ORF7a:V82A,ORF7a:T120I,ORF7b:T40I,ORF9b:T60A,S:T19R,S:G142D,S:R158G,S:N354T,S:L452R,S:T478K,S:D614G,S:P681R,S:D950N	ORF8:D119-,ORF8:F120-,S:E156-,S:F157-			C24130T|21J	C1385T,A5608G,C7644T,T9877C,C11200T,A11781G,G17058T,C20031T,A22623C,T26711C,C27223G,T28888C	0	1	12	13	19293-19557	ORF1b:1942-2030		3000	0	good	265	10	0
hCoV-19/USA/WI-WSLH-221599/2021|EPI_ISL_7263701|2021-11-12	hCoV-19/USA/WI-WSLH-221599/2021	EPI_ISL_7263701	2021-11-12	21J	AY.120	B.1.617.2.120	21J	Delta	21J (Delta)	7.08689	good	43	15	0	1	547	0	33	5	0	215	89101	55	29836	0.977661	false	G210T,C241T,C875T,C3037T,A3542G,G4181T,C6402T,C6408T,A6616G,C7124T,G8851T,C8986T,G9053T,C9559T,C10029T,A11201G,A11332G,C14408T,G15451A,C16466T,C19220T,C21618G,G22899T,T22917G,C22995A,A23403G,C23604G,G24410A,A25003G,G25459T,C25469T,C25667T,G25775T,A26612G,T26767C,T27638C,C27752T,C27874T,A28461G,G28881T,G28916T,G29402T,G29742T	22029-22034,27792-27793,28248-28253,28271		ORF7b:14-44	M:I82T,N:D63G,N:R203M,N:G215C,N:D377Y,ORF1a:L204F,ORF1a:T1093A,ORF1a:A1306S,ORF1a:P2046L,ORF1a:S2048F,ORF1a:P2287S,ORF1a:V2930L,ORF1a:T3255I,ORF1a:T3646A,ORF1b:P314L,ORF1b:G662S,ORF1b:P1000L,ORF1b:A1918V,ORF3a:A23S,ORF3a:S26L,ORF3a:S92L,ORF3a:W128L,ORF7a:V82A,ORF7a:T120I,ORF9b:T60A,S:T19R,S:R158G,S:G446V,S:L452R,S:T478K,S:D614G,S:P681R,S:D950N	ORF7b:F13-,ORF8:D119-,ORF8:F120-,S:E156-,S:F157-			C9559T|21J	C875T,A3542G,A6616G,G8851T,G22899T,G25459T,C25667T,G25775T,A26612G	0	1	9	10	21717-22005,22310-22542,23120-23144	ORF7b:14-44,S:52-148,S:250-327,S:520-528		3000	9.14815	good	547	10	0
hCoV-19/USA/WI-WSLH-221732/2021|EPI_ISL_7951160|2021-11-12	hCoV-19/USA/WI-WSLH-221732/2021	EPI_ISL_7951160	2021-11-12	21I	AY.37	B.1.617.2.37	21I	Delta	21I (Delta)	15.1811	good	34	13	0	0	1352	0	27	4	0	455	89150	55	29836	0.950741	false	G210T,C241T,G2185T,C2509T,C3037T,C5184T,A5584G,G9756A,C9891T,T11418C,C11514T,C13019T,C14408T,G15451A,C16466T,C18167T,C20233T,T20911C,C21618G,C22227T,G22661C,A23403G,C23604G,G24410A,C25469T,T26767C,T27638C,C27752T,A28461G,C28638T,G28881T,G29402T,C29541T,G29742T	22029-22034,28248-28253,28271			M:I82T,N:D63G,N:P122L,N:R203M,N:D377Y,ORF1a:E640D,ORF1a:P1640L,ORF1a:R3164H,ORF1a:A3209V,ORF1a:V3718A,ORF1a:T3750I,ORF1b:P314L,ORF1b:G662S,ORF1b:P1000L,ORF1b:P1567L,ORF1b:P2256S,ORF3a:S26L,ORF7a:V82A,ORF7a:T120I,ORF9b:T60A,S:T19R,S:R158G,S:A222V,S:V367L,S:D614G,S:P681R,S:D950N	ORF8:D119-,ORF8:F120-,S:E156-,S:F157-				G9756A,C18167T,C20233T,G22661C,C28638T,C29541T	0	0	6	6	2569-2850,19912-20200,21717-22005,22318-22542,22878-23144	ORF1a:768-862,ORF1b:2149-2245,S:52-148,S:252-327,S:439-528		3000	38.963	mediocre	1352	10	0
hCoV-19/USA/WI-WSLH-222073/2021|EPI_ISL_7951489|2021-11-12	hCoV-19/USA/WI-WSLH-222073/2021	EPI_ISL_7951489	2021-11-12	21J	AY.46.4	B.1.617.2.46.4	21J	Delta	21J (Delta)	11.1358	good	36	7	0	0	1201	0	28	2	0	399	89168	55	29836	0.95579	false	G210T,C241T,C3037T,G4181T,C6402T,C7124T,C8099T,C8982T,C8986T,G9053T,C10029T,C10977T,A11201G,A11332G,C14408T,C15240T,G15451A,C16466T,C19220T,C21618G,T22917G,C22995A,A23403G,G23545T,C23604G,G24410A,C25469T,T26767C,C26885T,C27752T,C27874T,A28461G,G28881T,G28916T,G29402T,G29742T	28248-28253,28271			M:I82T,N:D63G,N:R203M,N:G215C,N:D377Y,ORF1a:A1306S,ORF1a:P2046L,ORF1a:P2287S,ORF1a:T2906I,ORF1a:V2930L,ORF1a:T3255I,ORF1a:A3571V,ORF1a:T3646A,ORF1b:P314L,ORF1b:G662S,ORF1b:P1000L,ORF1b:A1918V,ORF3a:S26L,ORF7a:T120I,ORF7b:T40I,ORF9b:T60A,S:T19R,S:L452R,S:T478K,S:D614G,S:E661D,S:P681R,S:D950N	ORF8:D119-,ORF8:F120-			C15240T|21K&21J	C8099T,C8982T,C26885T	0	1	3	4	20490-20496,21717-22132,22139-22187,22196-22210,22234-22542,27191-27468,27526-27651,29007	M:223,N:245,ORF1b:2341-2343,ORF6:1-62,ORF7a:1-25,ORF7a:45-86,S:52-190,S:193-209,S:212-216,S:224-327		3000	33.3704	mediocre	1201	10	0
hCoV-19/USA/WI-MHDL-2021110475/2021|EPI_ISL_6861983|2021-11-14	hCoV-19/USA/WI-MHDL-2021110475/2021	EPI_ISL_6861983	2021-11-14	21J	AY.25	B.1.617.2.25	21J	Delta	21J (Delta)	25.0014	good	37	7	0	0	1193	0	27	2	0	412	89233	39	29843	0.956827	false	G210T,C241T,C3037T,G4181T,C6402T,C7124T,C8752T,C8986T,G9053T,C10029T,C10450T,A11201G,A11332G,C14408T,G15451A,C16466T,G18337T,C19220T,C21618G,G21624C,C23202T,A23403G,C23604G,G24410A,C25469T,G26107C,A26759G,T26767C,A27507C,C27874T,A28461G,T28672C,G28881T,G28916T,G28980T,G29402T,G29742T	28248-28253,28271			M:I82T,N:D63G,N:R203M,N:G215C,N:G236V,N:D377Y,ORF1a:A1306S,ORF1a:P2046L,ORF1a:P2287S,ORF1a:V2930L,ORF1a:T3255I,ORF1a:T3646A,ORF1b:P314L,ORF1b:G662S,ORF1b:P1000L,ORF1b:A1624S,ORF1b:A1918V,ORF3a:S26L,ORF3a:E239Q,ORF7b:T40I,ORF9b:T60A,S:T19R,S:R21T,S:T547I,S:D614G,S:P681R,S:D950N	ORF8:D119-,ORF8:F120-		G22917T	C23202T|23B	C8752T,C10450T,G18337T,G21624C,A26759G,T28672C,G28980T	1	1	7	9	19298-19312,19326-19551,21162-21366,21744-21902,21916-21994,22027-22074,22094-22095,22113-22118,22143-22160,22175-22192,22202-22212,22225-22272,22944-22945,22987-23000,23014-23079,23108,27528-27748,27750-27803	ORF1b:1944-1949,ORF1b:1953-2028,ORF1b:2565-2633,ORF7a:45-122,ORF7b:1-16,S:61-114,S:118-144,S:155-171,S:178,S:184-186,S:194-200,S:205-210,S:214-217,S:221-237,S:461,S:475-480,S:484-506,S:516		3000	33.0741	mediocre	1193	10	0
hCoV-19/USA/WI-MHDL-2021110476/2021|EPI_ISL_6861984|2021-11-14	hCoV-19/USA/WI-MHDL-2021110476/2021	EPI_ISL_6861984	2021-11-14	21J	AY.25	B.1.617.2.25	21J	Delta	21J (Delta)	112.734	bad	33	7	0	0	2829	0	27	2	0	961	89093	42	29794	0.900378	false	G210T,C241T,C3037T,G3085C,G4181T,C6402T,C7124T,C8986T,G9053T,C10029T,C10377T,C10977T,A11201G,A11332G,G12801A,C14408T,G15451A,C16466T,C19220T,C21618G,G22801T,T22917G,C22995A,A23403G,C23604G,G24410A,C25469T,G26107C,T26767C,A27507C,A28461G,G28881T,G28916T	28248-28253,28271			M:I82T,N:D63G,N:R203M,N:G215C,ORF1a:E940D,ORF1a:A1306S,ORF1a:P2046L,ORF1a:P2287S,ORF1a:V2930L,ORF1a:T3255I,ORF1a:P3371L,ORF1a:A3571V,ORF1a:T3646A,ORF1a:R4179K,ORF1b:P314L,ORF1b:G662S,ORF1b:P1000L,ORF1b:A1918V,ORF3a:S26L,ORF3a:E239Q,ORF9b:T60A,S:T19R,S:L452R,S:T478K,S:D614G,S:P681R,S:D950N	ORF8:D119-,ORF8:F120-		T29742G	C10977T|21J,G12801A|21J,G22801T|21J	G3085C,C10377T	1	3	2	6	2578-2623,2634-2646,2716-2834,2837,3521-3696,3730-3735,3738-3783,6148-6158,6168-6175,7068-7069,10441,10445-10542,10552-10649,10659-10665,19294-19570,19922-20480,21159-21386,21717-21718,21720-22374,27520-27840,27871-27880,28084-28088,29371-29510	N:366-413,ORF1a:771-786,ORF1a:790-794,ORF1a:817-858,ORF1a:1086-1144,ORF1a:1155-1173,ORF1a:1961-1965,ORF1a:1968-1970,ORF1a:2268,ORF1a:3392,ORF1a:3394-3426,ORF1a:3429-3462,ORF1a:3465-3467,ORF1b:1943-2035,ORF1b:2152-2338,ORF1b:2564-2640,ORF7a:43-122,ORF7b:1-29,ORF7b:39-42,ORF8:64-65,S:52-271		3000	93.6667	mediocre	2829	10	0
hCoV-19/USA/WI-WSLH-221733/2021|EPI_ISL_7951161|2021-11-14	hCoV-19/USA/WI-WSLH-221733/2021	EPI_ISL_7951161	2021-11-14	21J	AY.103	B.1.617.2.103	21J	Delta	21J (Delta)	1.32676	good	39	13	0	0	611	0	33	4	0	206	89172	41	29836	0.975989	false	G210T,C241T,C3037T,G4181T,C5812T,G6125A,C6402T,C7124T,C8986T,G9053T,C10029T,A11201G,A11332G,C14408T,G15451A,A16225G,C16466T,A17236G,C19220T,C21618G,C22185T,T22917G,C22995A,A23403G,C23604G,C24208T,G24410A,C25469T,C25487T,A26557G,T26767C,T27638C,C27752T,C27874T,A28461G,G28881T,G28916T,G29402T,G29742T	22029-22034,28248-28253,28271			M:E12G,M:I82T,N:D63G,N:R203M,N:G215C,N:D377Y,ORF1a:A1306S,ORF1a:E1954K,ORF1a:P2046L,ORF1a:P2287S,ORF1a:V2930L,ORF1a:T3255I,ORF1a:T3646A,ORF1b:P314L,ORF1b:G662S,ORF1b:T920A,ORF1b:P1000L,ORF1b:I1257V,ORF1b:A1918V,ORF3a:S26L,ORF3a:T32I,ORF7a:V82A,ORF7a:T120I,ORF7b:T40I,ORF9b:T60A,S:T19R,S:R158G,S:T208M,S:L452R,S:T478K,S:D614G,S:P681R,S:D950N	ORF8:D119-,ORF8:F120-,S:E156-,S:F157-				C5812T,G6125A,A16225G,C22185T,C25487T,A26557G	0	0	6	6	21717-21990,22313-22542,22878-22888,23049-23144	S:52-143,S:251-327,S:439-442,S:496-528		3000	11.5185	good	611	10	0
hCoV-19/USA/WI-MHDL-2021110362/2021|EPI_ISL_6945699|2021-11-15	hCoV-19/USA/WI-MHDL-2021110362/2021	EPI_ISL_6945699	2021-11-15	21J	AY.103	B.1.617.2.103	21J	Delta	21J (Delta)	2023.9	bad	19	0	0	0	12442	0	15	0	0	4202	88406	343	29836	0.570244	false	C3037T,G4181T,C7124T,C8986T,G9053T,G11417T,C14408T,C16466T,T22917G,C22995A,C23604G,C24208T,G24410A,C25469T,T26767C,T27291C,C27874T,A28461G,G29742T				M:I82T,N:D63G,ORF1a:A1306S,ORF1a:P2287S,ORF1a:V2930L,ORF1a:V3718F,ORF1b:P314L,ORF1b:P1000L,ORF3a:S26L,ORF7b:T40I,ORF9b:T60A,S:L452R,S:T478K,S:P681R,S:D950N			G17236A	T27291C|21J	G11417T	1	1	1	3	705-965,1313-1595,1943-2205,2569-2850,3184-3482,3827-4077,4403-4658,4996-5287,5621-5894,6402,6847-7058,7390-7651,7998-8275,8636-8913,9246-9502,9835-10099,10438-10688,11049-11332,11669-11889,12235-12439,12780-13029,13051,13364-13625,13962-14232,14580-14895,15225-15503,15862-16144,16486-16770,17739-17993,18314-18315,18325-18618,18958-19232,19592-19866,20232-20496,20868-21104,21428-22290,22627-22821…	E:16-76,M:1-7,M:123-214,N:1-48,N:162-245,N:362-413,ORF1a:26,ORF1a:147-234,ORF1a:350-444,ORF1a:560-647,ORF1a:768-862,ORF1a:973-1073,ORF1a:1188-1271,ORF1a:1380-1465,ORF1a:1577-1674,ORF1a:1786-1877,ORF1a:2046,ORF1a:2194-2265,ORF1a:2375-2462,ORF1a:2578-2670,ORF1a:2791-2883,ORF1a:2994-3079,ORF1a:3190-3278,ORF1a:3391-3475,ORF1a:3595-3689,ORF1a:3802-3875,ORF1a:3990-4058,ORF1a:4172-4255,ORF1a:4262,ORF1a:…		3000	449.704	bad	12442	10	0
hCoV-19/USA/WI-MHDL-2021110363/2021|EPI_ISL_6945700|2021-11-15	hCoV-19/USA/WI-MHDL-2021110363/2021	EPI_ISL_6945700	2021-11-15	21I	AY.75	B.1.617.2.75	21I	Delta	21I (Delta)	0	good	32	13	0	0	274	0	26	4	0	92	89158	55	29836	0.986791	false	G210T,C241T,C3037T,C5184T,A5584G,C9891T,C11345T,T11418C,C11514T,C13019T,A13636C,C14408T,G15451A,C16466T,C21618G,C21622T,C22227T,T22917G,C22995A,A23403G,C23604G,C23996T,G24410A,C25469T,T26767C,G27378A,T27638C,C27752T,A28461G,G28881T,G29402T,G29742T	22029-22034,28248-28253,28271			M:I82T,N:D63G,N:R203M,N:D377Y,ORF1a:P1640L,ORF1a:A3209V,ORF1a:L3694F,ORF1a:V3718A,ORF1a:T3750I,ORF1b:I57L,ORF1b:P314L,ORF1b:G662S,ORF1b:P1000L,ORF3a:S26L,ORF7a:V82A,ORF7a:T120I,ORF9b:T60A,S:T19R,S:R158G,S:A222V,S:L452R,S:T478K,S:D614G,S:P681R,S:P812S,S:D950N	ORF8:D119-,ORF8:F120-,S:E156-,S:F157-				C11345T,A13636C,C23996T,G27378A	0	0	4	4	21717-21990	S:52-143		3000	0	good	274	10	0
hCoV-19/USA/WI-MHDL-2021110477/2021|EPI_ISL_6861985|2021-11-15	hCoV-19/USA/WI-MHDL-2021110477/2021	EPI_ISL_6861985	2021-11-15	21J	AY.103	B.1.617.2.103	21J	Delta	21J (Delta)	4.34028	good	41	13	0	0	260	0	33	4	0	88	89242	32	29853	0.988596	false	G210T,C241T,C1059T,C2106T,C3037T,G4181T,C6402T,C7124T,A8420G,C8986T,G9053T,C10029T,A11201G,A11332G,C11572T,C11950T,C14408T,G15451A,C16466T,A17236G,C19220T,C21618G,C21639T,G21987A,T22917G,C22995A,A23403G,C23604G,C24208T,G24410A,C25469T,T26767C,T27291C,T27638C,C27752T,C27874T,A28461G,G28881T,G28916T,G29402T,G29742T	22029-22034,28248-28253,28271			M:I82T,N:D63G,N:R203M,N:G215C,N:D377Y,ORF1a:T265I,ORF1a:T614I,ORF1a:A1306S,ORF1a:P2046L,ORF1a:P2287S,ORF1a:M2719V,ORF1a:V2930L,ORF1a:T3255I,ORF1a:T3646A,ORF1b:P314L,ORF1b:G662S,ORF1b:P1000L,ORF1b:I1257V,ORF1b:A1918V,ORF3a:S26L,ORF7a:V82A,ORF7a:T120I,ORF7b:T40I,ORF9b:T60A,S:T19R,S:P26L,S:G142D,S:R158G,S:L452R,S:T478K,S:D614G,S:P681R,S:D950N	ORF8:D119-,ORF8:F120-,S:E156-,S:F157-			C1059T|20G&20C&21C&21F&20H,T27291C|21J	C2106T,A8420G,C11572T,C11950T,C21639T	0	2	5	7	19293-19552	ORF1b:1942-2029		3000	0	good	260	10	0
hCoV-19/USA/WI-MHDL-2021110478/2021|EPI_ISL_6861986|2021-11-15	hCoV-19/USA/WI-MHDL-2021110478/2021	EPI_ISL_6861986	2021-11-15	21J	AY.103	B.1.617.2.103	21J	Delta	21J (Delta)	2.77778	good	43	13	0	0	261	0	34	4	0	87	89213	39	29853	0.988329	false	G210T,C241T,T2827C,C3037T,G4105T,G4181T,T6096C,C6402T,C7124T,C8986T,G9053T,C10029T,C10572T,A11201G,A11332G,C11572T,C12624A,C14408T,G15451A,C16466T,A17236G,C19154T,C19220T,T21087C,C21618G,G21987A,T22917G,C22995A,A23403G,C23604G,C24208T,G24410A,C25469T,T26767C,T27291C,T27638C,C27752T,C27874T,A28461G,G28881T,G28916T,G29402T,G29742T	22029-22034,28248-28253,28271			M:I82T,N:D63G,N:R203M,N:G215C,N:D377Y,ORF1a:K1280N,ORF1a:A1306S,ORF1a:L1944S,ORF1a:P2046L,ORF1a:P2287S,ORF1a:V2930L,ORF1a:T3255I,ORF1a:A3436V,ORF1a:T3646A,ORF1a:P4120H,ORF1b:P314L,ORF1b:G662S,ORF1b:P1000L,ORF1b:I1257V,ORF1b:T1896I,ORF1b:A1918V,ORF3a:S26L,ORF7a:V82A,ORF7a:T120I,ORF7b:T40I,ORF9b:T60A,S:T19R,S:G142D,S:R158G,S:L452R,S:T478K,S:D614G,S:P681R,S:D950N	ORF8:D119-,ORF8:F120-,S:E156-,S:F157-			T27291C|21J	T2827C,G4105T,T6096C,C10572T,C11572T,C12624A,C19154T,T21087C	0	1	8	9	19297-19557	ORF1b:1944-2030		3000	0	good	261	10	0
hCoV-19/USA/WI-MHDL-2021110479/2021|EPI_ISL_6861987|2021-11-15	hCoV-19/USA/WI-MHDL-2021110479/2021	EPI_ISL_6861987	2021-11-15	21J	AY.25	B.1.617.2.25	21J	Delta	21J (Delta)	0.173611	good	37	13	0	0	0	0	32	4	0	0	89240	39	29854	0.997091	false	G210T,C241T,C3037T,G4181T,C6402T,C7124T,C8986T,G9053T,C10029T,A11201G,A11332G,C14408T,G15451A,C16466T,C19220T,C21618G,C21897T,G21987A,T22917G,C22995A,A23403G,C23604G,G24410A,C25469T,G26107C,G26144T,C26611T,T26767C,A27507C,T27638C,C27752T,C27874T,A28461G,G28881T,G28916T,G29402T,G29742T	22029-22034,28248-28253,28271			M:T30I,M:I82T,N:D63G,N:R203M,N:G215C,N:D377Y,ORF1a:A1306S,ORF1a:P2046L,ORF1a:P2287S,ORF1a:V2930L,ORF1a:T3255I,ORF1a:T3646A,ORF1b:P314L,ORF1b:G662S,ORF1b:P1000L,ORF1b:A1918V,ORF3a:S26L,ORF3a:E239Q,ORF3a:G251V,ORF7a:V82A,ORF7a:T120I,ORF7b:T40I,ORF9b:T60A,S:T19R,S:S112L,S:G142D,S:R158G,S:L452R,S:T478K,S:D614G,S:P681R,S:D950N	ORF8:D119-,ORF8:F120-,S:E156-,S:F157-			C21897T|21J,G26144T|19A	C26611T	0	2	1	3				3000	0	good	0	10	0
hCoV-19/USA/WI-MHDL-2021110483/2021|EPI_ISL_6861991|2021-11-15	hCoV-19/USA/WI-MHDL-2021110483/2021	EPI_ISL_6861991	2021-11-15	21J	AY.44	B.1.617.2.44	21J	Delta	21J (Delta)	91.8403	mediocre	48	13	0	0	265	0	38	4	0	89	89217	31	29853	0.988463	false	G210T,C241T,C1170A,C2675T,C3037T,C3737T,G3971T,G4181T,C4246T,C6040T,C6402T,C6638T,C7124T,C7926T,C8986T,G9053T,C10029T,G11083T,A11201G,A11332G,C13019T,T14014G,C14408T,G15451A,C16466T,C16726T,C19220T,C21618G,G21987A,T22917G,C22995A,A23403G,C23604G,G24410A,C25469T,T26767C,T27638C,C27752T,C27874T,G28073T,C28112T,A28461G,C28651T,G28881T,G28916T,G29402T,A29700G,G29742T	22029-22034,28248-28253,28271			M:I82T,N:D63G,N:R203M,N:G215C,N:D377Y,ORF1a:S302Y,ORF1a:P804S,ORF1a:P1158S,ORF1a:V1236F,ORF1a:A1306S,ORF1a:P2046L,ORF1a:H2125Y,ORF1a:P2287S,ORF1a:A2554V,ORF1a:V2930L,ORF1a:T3255I,ORF1a:L3606F,ORF1a:T3646A,ORF1b:F183V,ORF1b:P314L,ORF1b:G662S,ORF1b:P1000L,ORF1b:H1087Y,ORF1b:A1918V,ORF3a:S26L,ORF7a:V82A,ORF7a:T120I,ORF7b:T40I,ORF8:L60F,ORF9b:T60A,S:T19R,S:G142D,S:R158G,S:L452R,S:T478K,S:D614G,S:P681…	ORF8:D119-,ORF8:F120-,S:E156-,S:F157-			C6638T|21J,C7926T|21J&21K,G11083T|21J&19A,C13019T|21I,C16726T|21J,G28073T|21J	C1170A,C2675T,C3737T,G3971T,C4246T,C28112T,C28651T	0	6	7	13	19293-19557	ORF1b:1942-2030		3000	0	good	265	10	0
hCoV-19/USA/WI-MHDL-2021120025/2021|EPI_ISL_7153317|2021-11-15	hCoV-19/USA/WI-MHDL-2021120025/2021	EPI_ISL_7153317	2021-11-15	21I	AY.47	B.1.617.2.47	21I	Delta	21I (Delta)	0	good	36	13	0	0	274	0	30	4	0	92	89142	55	29836	0.986791	false	G210T,C241T,C1684T,T2152A,C3037T,G5164T,C5184T,A5584G,C9891T,T11418C,C11514T,C12049T,C13019T,C14408T,G15451A,C15656T,C16466T,C21618G,C22227T,G22427A,T22917G,C22995A,A23403G,C23604G,G24410A,C25469T,T26767C,T27638C,C27752T,G28326T,A28461G,G28881T,C29037T,T29341C,G29402T,G29742T	22029-22034,28248-28253,28271			M:I82T,N:G18V,N:D63G,N:R203M,N:S255F,N:D377Y,ORF1a:D629E,ORF1a:E1633D,ORF1a:P1640L,ORF1a:A3209V,ORF1a:V3718A,ORF1a:T3750I,ORF1b:P314L,ORF1b:G662S,ORF1b:T730I,ORF1b:P1000L,ORF3a:S26L,ORF7a:V82A,ORF7a:T120I,ORF9b:V15L,ORF9b:T60A,S:T19R,S:R158G,S:A222V,S:V289I,S:L452R,S:T478K,S:D614G,S:P681R,S:D950N	ORF8:D119-,ORF8:F120-,S:E156-,S:F157-				T2152A,C15656T,C29037T,T29341C	0	0	4	4	21717-21990	S:52-143		3000	0	good	274	10	0
hCoV-19/USA/WI-WSLH-221827/2021|EPI_ISL_7951250|2021-11-15	hCoV-19/USA/WI-WSLH-221827/2021	EPI_ISL_7951250	2021-11-15	21J	AY.103	B.1.617.2.103	21J	Delta	21J (Delta)	11.7316	good	40	7	0	0	1197	0	28	2	0	406	89152	55	29836	0.955924	false	G210T,C241T,C2062T,C3037T,G4181T,C6195T,C7124T,G7693T,G8349A,C8956T,C8986T,G9053T,C9169T,C10029T,A11201G,A11332G,C14408T,G15451A,C16466T,A17236G,C18657T,C19220T,C21618G,A23403G,C23604G,C24208T,G24410A,C25469T,G26506T,T26767C,C27005T,T27638C,C27752T,C27874T,C27999T,A28461G,G28881T,G28916T,G29402T,G29742T	28248-28253,28271			M:I82T,N:D63G,N:R203M,N:G215C,N:D377Y,ORF1a:A1306S,ORF1a:P1977L,ORF1a:P2287S,ORF1a:Q2476H,ORF1a:S2695N,ORF1a:V2930L,ORF1a:T3255I,ORF1a:T3646A,ORF1b:P314L,ORF1b:G662S,ORF1b:P1000L,ORF1b:I1257V,ORF1b:A1918V,ORF3a:S26L,ORF7a:V82A,ORF7a:T120I,ORF7b:T40I,ORF8:P36S,ORF9b:T60A,S:T19R,S:D614G,S:P681R,S:D950N	ORF8:D119-,ORF8:F120-				C2062T,C6195T,G7693T,G8349A,C8956T,C9169T,C18657T,G26506T,C27005T,C27999T	0	0	10	10	6241-6495,8636,20496,21717-22061,22208-22210,22218-22226,22234-22545,22878-23144,23823-23826	ORF1a:1992-2077,ORF1a:2791,ORF1b:2343,S:52-167,S:216,S:219-222,S:224-328,S:439-528,S:754-755		3000	33.2222	mediocre	1197	10	0
hCoV-19/USA/WI-MHDL-2021110364/2021|EPI_ISL_6945701|2021-11-16	hCoV-19/USA/WI-MHDL-2021110364/2021	EPI_ISL_6945701	2021-11-16	21J	AY.100	B.1.617.2.100	21J	Delta	21J (Delta)	4.48973	good	42	13	0	0	826	0	33	4	0	277	89118	55	29836	0.968331	false	G210T,C241T,G991A,C1473T,G1958A,C3037T,G4181T,G6344T,C6402T,C7124T,C8986T,G9053T,C9559T,C10029T,A11201G,A11332G,C14408T,C15240T,G15451A,C16466T,G17122T,C19220T,C21618G,T22917G,C22995A,A23403G,C23604G,C24130T,G24410A,C25469T,G26049T,T26159C,T26767C,T27638C,C27752T,C27874T,T28007C,A28461G,G28881T,G28916T,G29402T,G29742T	22029-22034,28248-28253,28271			M:I82T,N:D63G,N:R203M,N:G215C,N:D377Y,ORF1a:T403I,ORF1a:A565T,ORF1a:A1306S,ORF1a:V2027L,ORF1a:P2046L,ORF1a:P2287S,ORF1a:V2930L,ORF1a:T3255I,ORF1a:T3646A,ORF1b:P314L,ORF1b:G662S,ORF1b:P1000L,ORF1b:A1219S,ORF1b:A1918V,ORF3a:S26L,ORF3a:L219F,ORF3a:V256A,ORF7a:V82A,ORF7a:T120I,ORF7b:T40I,ORF9b:T60A,S:T19R,S:R158G,S:L452R,S:T478K,S:D614G,S:P681R,S:D950N	ORF8:D119-,ORF8:F120-,S:E156-,S:F157-			C24130T|21J	G991A,C1473T,G1958A,G6344T,G26049T,T26159C	0	1	6	7	9246-9502,19276-19570,21717-21990	ORF1a:2994-3079,ORF1b:1937-2035,S:52-143		3000	19.4815	good	826	10	0
hCoV-19/USA/WI-MHDL-2021110365/2021|EPI_ISL_6945702|2021-11-16	hCoV-19/USA/WI-MHDL-2021110365/2021	EPI_ISL_6945702	2021-11-16	21J	AY.25.1	B.1.617.2.25.1	21J	Delta	21J (Delta)	0.878038	good	41	16	0	0	553	0	34	5	0	184	89106	55	29836	0.97746	false	G210T,C241T,C1419T,A2396G,G2564A,C3037T,A3948G,G4181T,C5175T,C6402T,C7124T,C8986T,G9053T,C10029T,A11201G,A11332G,G11562T,C14408T,G15451A,C15928T,C16466T,C19220T,C21618G,T22917G,C22995A,A23403G,C23604G,G24410A,C25469T,G26107C,T26767C,C26885T,A27507C,T27638C,C27752T,A28461G,G28881T,G28916T,G29402T,G29620C,G29742T	22029-22034,27792-27794,28248-28253,28271			M:I82T,N:D63G,N:R203M,N:G215C,N:D377Y,ORF1a:A385V,ORF1a:T711A,ORF1a:E767K,ORF1a:D1228G,ORF1a:A1306S,ORF1a:T1637I,ORF1a:P2046L,ORF1a:P2287S,ORF1a:V2930L,ORF1a:T3255I,ORF1a:T3646A,ORF1a:C3766F,ORF1b:P314L,ORF1b:G662S,ORF1b:P821S,ORF1b:P1000L,ORF1b:A1918V,ORF3a:S26L,ORF3a:E239Q,ORF7a:V82A,ORF7a:T120I,ORF9b:T60A,S:T19R,S:R158G,S:L452R,S:T478K,S:D614G,S:P681R,S:D950N	ORF7b:F13-,ORF8:D119-,ORF8:F120-,S:E156-,S:F157-				C1419T,A2396G,G2564A,C5175T,C15928T,C26885T,G29620C	0	0	7	7	21717-21990,27826-28104	ORF7b:24-44,ORF8:1-71,S:52-143		3000	9.37037	good	553	10	0
hCoV-19/USA/WI-MHDL-2021120022/2021|EPI_ISL_7153320|2021-11-16	hCoV-19/USA/WI-MHDL-2021120022/2021	EPI_ISL_7153320	2021-11-16	21J	AY.103	B.1.617.2.103	21J	Delta	21J (Delta)	11.1111	good	43	13	0	0	274	0	33	4	0	92	89114	55	29836	0.986791	false	G210T,C241T,T1675C,T2827C,C3037T,G4181T,C6402T,C7124T,C8895T,C8986T,G9053T,C9611T,C10029T,A11201G,A11332G,C11572T,C12624A,C14408T,G15451A,A16166G,C16466T,A17236G,C18795T,C19220T,C21618G,T22917G,C22995A,A23403G,C23604G,C24208T,G24410A,C25469T,C25624T,T26767C,T27291C,T27638C,C27752T,C27874T,A28461G,G28881T,G28916T,G29402T,G29742T	22029-22034,28248-28253,28271			M:I82T,N:D63G,N:R203M,N:G215C,N:D377Y,ORF1a:A1306S,ORF1a:P2046L,ORF1a:P2287S,ORF1a:T2877I,ORF1a:V2930L,ORF1a:L3116F,ORF1a:T3255I,ORF1a:T3646A,ORF1a:P4120H,ORF1b:P314L,ORF1b:G662S,ORF1b:N900S,ORF1b:P1000L,ORF1b:I1257V,ORF1b:A1918V,ORF3a:S26L,ORF3a:H78Y,ORF7a:V82A,ORF7a:T120I,ORF7b:T40I,ORF9b:T60A,S:T19R,S:R158G,S:L452R,S:T478K,S:D614G,S:P681R,S:D950N	ORF8:D119-,ORF8:F120-,S:E156-,S:F157-			C25624T|21L,T27291C|21J	T1675C,T2827C,C8895T,C9611T,C11572T,C12624A,A16166G,C18795T	0	2	8	10	21717-21990	S:52-143		3000	0	good	274	10	0
hCoV-19/USA/WI-MHDL-2021120023/2021|EPI_ISL_7153323|2021-11-16	hCoV-19/USA/WI-MHDL-2021120023/2021	EPI_ISL_7153323	2021-11-16	21J	AY.103	B.1.617.2.103	21J	Delta	21J (Delta)	14.0625	good	41	13	0	0	274	0	33	4	0	92	89122	55	29836	0.986791	false	G210T,C241T,G2155T,C3037T,G4181T,C6402T,C7124T,C8986T,G9053T,C9561T,C10029T,A11201G,A11332G,C11572T,C14408T,G15451A,T15939C,C16466T,A17236G,C19220T,C21618G,T22917G,C22995A,A23403G,C23604G,C24208T,G24410A,C25469T,T26767C,T27291C,C27527T,T27638C,C27752T,C27874T,C28236A,G28378T,A28461G,G28881T,G28916T,G29402T,G29742T	22029-22034,28248-28253,28271			M:I82T,N:D63G,N:R203M,N:G215C,N:D377Y,ORF1a:W630C,ORF1a:A1306S,ORF1a:P2046L,ORF1a:P2287S,ORF1a:V2930L,ORF1a:S3099L,ORF1a:T3255I,ORF1a:T3646A,ORF1b:P314L,ORF1b:G662S,ORF1b:P1000L,ORF1b:I1257V,ORF1b:A1918V,ORF3a:S26L,ORF7a:P45L,ORF7a:V82A,ORF7a:T120I,ORF7b:T40I,ORF8:R115S,ORF9b:R32L,ORF9b:T60A,S:T19R,S:R158G,S:L452R,S:T478K,S:D614G,S:P681R,S:D950N	ORF8:D119-,ORF8:F120-,S:E156-,S:F157-			T15939C|23A&22F&23B,T27291C|21J,C27527T|21J	G2155T,C9561T,C11572T,C28236A,G28378T	0	3	5	8	21717-21990	S:52-143		3000	0	good	274	10	0
hCoV-19/USA/WI-MHDL-2021120024/2021|EPI_ISL_7153326|2021-11-16	hCoV-19/USA/WI-MHDL-2021120024/2021	EPI_ISL_7153326	2021-11-16	21J	AY.103	B.1.617.2.103	21J	Delta	21J (Delta)	0	good	38	13	0	0	274	0	29	4	0	92	89134	55	29836	0.986791	false	G210T,C241T,G702T,T2047C,C3037T,G4181T,C6402T,G6421T,C7124T,C8986T,G9053T,C10029T,A11201G,A11332G,C14408T,G15451A,C16466T,A17236G,C19220T,C21618G,T22917G,C22995A,A23403G,C23604G,C24208T,G24410A,C25469T,G25494T,T26767C,T27291C,T27638C,C27752T,C27874T,A28461G,G28881T,G28916T,G29402T,G29742T	22029-22034,28248-28253,28271			M:I82T,N:D63G,N:R203M,N:G215C,N:D377Y,ORF1a:G146V,ORF1a:A1306S,ORF1a:P2046L,ORF1a:P2287S,ORF1a:V2930L,ORF1a:T3255I,ORF1a:T3646A,ORF1b:P314L,ORF1b:G662S,ORF1b:P1000L,ORF1b:I1257V,ORF1b:A1918V,ORF3a:S26L,ORF7a:V82A,ORF7a:T120I,ORF7b:T40I,ORF9b:T60A,S:T19R,S:R158G,S:L452R,S:T478K,S:D614G,S:P681R,S:D950N	ORF8:D119-,ORF8:F120-,S:E156-,S:F157-			T27291C|21J	G702T,T2047C,G6421T,G25494T	0	1	4	5	21717-21990	S:52-143		3000	0	good	274	10	0
hCoV-19/USA/WI-MHDL-2021120090/2021|EPI_ISL_7809446|2021-11-16	hCoV-19/USA/WI-MHDL-2021120090/2021	EPI_ISL_7809446	2021-11-16	21J	AY.113	B.1.617.2.113	21J	Delta	21J (Delta)	43.0303	mediocre	41	13	0	0	1299	0	30	4	0	450	89197	39	29845	0.953349	false	A136G,G210T,C241T,G1899A,C3037T,G4181T,C6402T,C7124T,C8986T,G9053T,C9165T,T9535C,C10029T,A10323G,A11201G,A11332G,A12772G,C13115T,C14230T,C15240T,G15451A,C16466T,C17676T,C19220T,A19892G,C21618G,T22917G,C22995A,A23403G,C23604G,T24184A,G24410A,C25469T,T26767C,C27874T,G27990T,A28461G,G28881T,G28916T,G29402T,G29742T	22029-22034,28248-28253,28271			M:I82T,N:D63G,N:R203M,N:G215C,N:D377Y,ORF1a:R545Q,ORF1a:A1306S,ORF1a:P2046L,ORF1a:P2287S,ORF1a:V2930L,ORF1a:T2967I,ORF1a:T3255I,ORF1a:K3353R,ORF1a:T3646A,ORF1b:P255S,ORF1b:G662S,ORF1b:P1000L,ORF1b:A1918V,ORF1b:D2142G,ORF3a:S26L,ORF7b:T40I,ORF8:V33F,ORF9b:T60A,S:T19R,S:R158G,S:L452R,S:T478K,S:D614G,S:P681R,S:D950N	ORF8:D119-,ORF8:F120-,S:E156-,S:F157-		A21987G,T27752C		A136G,G1899A,T9535C,C13115T,C14230T,C17676T,A19892G,T24184A,G27990T	2	0	9	11	6880-6884,14293-14321,14334-14482,14491-14494,14920-14953,15038-15066,15102-15120,15135-15179,19299-19309,19311-19312,19327-19498,20241-20269,20282-20293,20323-20348,20351-20396,21162-21386,21733-21788,21795-21819,21833-21958,21971-21973,27528-27744,27757-27791	ORF1a:2205-2207,ORF1b:276-285,ORF1b:289-339,ORF1b:342-343,ORF1b:485-496,ORF1b:524-533,ORF1b:545-551,ORF1b:556-571,ORF1b:1944-1949,ORF1b:1954-2011,ORF1b:2258-2268,ORF1b:2272-2276,ORF1b:2286-2310,ORF1b:2565-2640,ORF7a:45-117,ORF7a:122,ORF7b:1-12,S:57-76,S:78-86,S:91-132,S:137		3000	37	mediocre	1299	10	0
hCoV-19/USA/WI-WSLH-221608/2021|EPI_ISL_7263710|2021-11-16	hCoV-19/USA/WI-WSLH-221608/2021	EPI_ISL_7263710	2021-11-16	21J	AY.103	B.1.617.2.103	21J	Delta	21J (Delta)	549.816	bad	34	7	0	0	6630	0	26	2	0	2215	88642	233	29836	0.768284	false	C3037T,G4181T,C4633T,C6402T,C8986T,G9053T,C10029T,A11201G,A11332G,C14408T,G14584A,G14712T,G15451A,C16466T,A17236G,C19220T,C21304A,G21305A,A23403G,C23604G,C24208T,G24410A,C25469T,T26767C,C27874T,G27933T,C28377T,A28461G,T28723C,G28881T,G28916T,G29402T,G29690T,G29742T	28248-28253,28271			M:I82T,N:A35V,N:D63G,N:R203M,N:G215C,N:D377Y,ORF1a:A1306S,ORF1a:P2046L,ORF1a:V2930L,ORF1a:T3255I,ORF1a:T3646A,ORF1b:P314L,ORF1b:A373T,ORF1b:G662S,ORF1b:P1000L,ORF1b:I1257V,ORF1b:A1918V,ORF1b:R2613N,ORF3a:S26L,ORF7b:T40I,ORF8:A14S,ORF9b:R32C,ORF9b:T60A,S:D614G,S:P681R,S:D950N	ORF8:D119-,ORF8:F120-				C4633T,G14584A,G14712T,C21304A,G21305A,G27933T,C28377T,T28723C,G29690T	0	0	9	9	238-261,269-273,275-342,1943-2218,2569-2616,2624,2791-2850,3784-3916,5933-5953,6148,6157-6197,6494-7347,8320-8947,9223-9226,9233-9236,9245-9843,10738-11056,11309-11331,11373-11376,13364-13638,14272-14277,14526-14528,14536-14570,14899,16187-16193,16399-16444,17739-17993,19912-20237,20489-20813,21428-21593,21602-21635,21637-22641,22866-23144,23823-23846,24095-24100,25878-25924,26291-26298,26351-263…	E:16-18,E:36-37,E:42-48,E:51-57,M:1-7,M:123-215,ORF1a:2-26,ORF1a:560-651,ORF1a:768-784,ORF1a:787,ORF1a:842-862,ORF1a:1173-1217,ORF1a:1890-1896,ORF1a:1961,ORF1a:1964-1978,ORF1a:2077-2361,ORF1a:2685-2894,ORF1a:2986-2987,ORF1a:2990-2991,ORF1a:2994-3193,ORF1a:3491-3597,ORF1a:3682-3689,ORF1a:3703-3704,ORF1a:4367-4401,ORF1b:1-57,ORF1b:269-270,ORF1b:353-354,ORF1b:357-368,ORF1b:478,ORF1b:907-909,ORF1b:97…		3000	234.444	bad	6630	10	0
hCoV-19/USA/WI-WSLH-221734/2021|EPI_ISL_7951162|2021-11-16	hCoV-19/USA/WI-WSLH-221734/2021	EPI_ISL_7951162	2021-11-16	21J	AY.103	B.1.617.2.103	21J	Delta	21J (Delta)	11.7571	good	43	13	0	0	517	0	34	4	0	174	89114	55	29836	0.978664	false	G210T,C241T,G1335C,C3037T,A3780G,G4181T,G4255A,C5144T,C6402T,C7124T,C7703T,C8986T,G9053T,G9086A,C10029T,A11201G,A11332G,C14408T,G15451A,C16466T,A17236G,C19220T,C21618G,C22224T,T22917G,C22995A,A23403G,C23604G,C24208T,G24410A,C25469T,T26767C,T27291C,C27527T,T27638C,C27752T,C27874T,A28461G,G28881T,G28916T,G29402T,G29706C,G29742T	22029-22034,28248-28253,28271			M:I82T,N:D63G,N:R203M,N:G215C,N:D377Y,ORF1a:C357S,ORF1a:N1172S,ORF1a:A1306S,ORF1a:P2046L,ORF1a:P2287S,ORF1a:P2480S,ORF1a:V2930L,ORF1a:G2941S,ORF1a:T3255I,ORF1a:T3646A,ORF1b:P314L,ORF1b:G662S,ORF1b:P1000L,ORF1b:I1257V,ORF1b:A1918V,ORF3a:S26L,ORF7a:P45L,ORF7a:V82A,ORF7a:T120I,ORF7b:T40I,ORF9b:T60A,S:T19R,S:R158G,S:S221L,S:L452R,S:T478K,S:D614G,S:P681R,S:D950N	ORF8:D119-,ORF8:F120-,S:E156-,S:F157-			T27291C|21J,C27527T|21J	G1335C,A3780G,G4255A,C5144T,C7703T,G9086A,C22224T,G29706C	0	2	8	10	21717-21990,22313-22542,23132-23144	S:52-143,S:251-327,S:524-528		3000	8.03704	good	517	10	0
hCoV-19/USA/WI-MHDL-2021110366/2021|EPI_ISL_6945703|2021-11-17	hCoV-19/USA/WI-MHDL-2021110366/2021	EPI_ISL_6945703	2021-11-17	21J	AY.25	B.1.617.2.25	21J	Delta	21J (Delta)	0.173611	good	42	13	0	0	274	0	30	4	0	92	89118	55	29836	0.986791	false	G210T,C241T,G376A,C3037T,A3126G,G4181T,C6402T,C7124T,C7768T,C8986T,G9053T,C10029T,C10252T,C10894T,A11201G,A11332G,C11572T,C14408T,G15451A,C16466T,C17676T,C19220T,C21618G,T22917G,C22995A,A23403G,C23604G,G24410A,C25469T,G26107C,C26611T,T26767C,A27507C,T27638C,C27752T,C27874T,A28461G,G28881T,G28916T,G29402T,C29537T,G29742T	22029-22034,28248-28253,28271			M:T30I,M:I82T,N:D63G,N:R203M,N:G215C,N:D377Y,ORF1a:D954G,ORF1a:A1306S,ORF1a:P2046L,ORF1a:P2287S,ORF1a:V2930L,ORF1a:T3255I,ORF1a:T3646A,ORF1b:P314L,ORF1b:G662S,ORF1b:P1000L,ORF1b:A1918V,ORF3a:S26L,ORF3a:E239Q,ORF7a:V82A,ORF7a:T120I,ORF7b:T40I,ORF9b:T60A,S:T19R,S:R158G,S:L452R,S:T478K,S:D614G,S:P681R,S:D950N	ORF8:D119-,ORF8:F120-,S:E156-,S:F157-				G376A,A3126G,C7768T,C10252T,C10894T,C11572T,C17676T,C26611T,C29537T	0	0	9	9	21717-21990	S:52-143		3000	0	good	274	10	0
hCoV-19/USA/WI-MHDL-2021110367/2021|EPI_ISL_6945704|2021-11-17	hCoV-19/USA/WI-MHDL-2021110367/2021	EPI_ISL_6945704	2021-11-17	21J	AY.43	B.1.617.2.43	21J	Delta	21J (Delta)	11.5131	good	38	13	0	0	1098	0	33	4	0	370	88270	343	29836	0.949604	false	A387G,C3037T,G4181T,C6402T,C7124T,T8296C,C8986T,G9053T,C10029T,G11083T,A11201G,A11332G,C14408T,G15451A,C15952A,C16466T,G18883A,C19220T,C19718T,C21618G,C23191T,A23403G,C23604G,G24410A,C24797T,C25469T,T26767C,G27621A,T27638C,C27752T,C27874T,A28299T,A28461G,G28881T,G28916T,G29402T,C29535A,G29742T	22029-22034,28248-28253,28271			M:I82T,N:Q9L,N:D63G,N:R203M,N:G215C,N:D377Y,ORF1a:E41G,ORF1a:A1306S,ORF1a:P2046L,ORF1a:P2287S,ORF1a:V2930L,ORF1a:T3255I,ORF1a:L3606F,ORF1a:T3646A,ORF1b:P314L,ORF1b:G662S,ORF1b:L829I,ORF1b:P1000L,ORF1b:V1806I,ORF1b:A1918V,ORF1b:T2084I,ORF3a:S26L,ORF7a:V82A,ORF7a:T120I,ORF7b:T40I,ORF9b:S6C,ORF9b:T60A,S:T19R,S:R158G,S:D614G,S:P681R,S:D950N,S:P1079S	ORF8:D119-,ORF8:F120-,S:E156-,S:F157-			G11083T|21J&19A	A387G,T8296C,G18883A,C19718T,C23191T,C24797T,G27621A,C29535A	0	1	8	9	13364-13625,19276-19570,21717-21990,22878-23144	ORF1a:26,ORF1a:4367-4401,ORF1b:1-53,ORF1b:1937-2035,S:52-143,S:439-528		3000	29.5556	good	1098	10	0
hCoV-19/USA/WI-MHDL-2021110368/2021|EPI_ISL_6945705|2021-11-17	hCoV-19/USA/WI-MHDL-2021110368/2021	EPI_ISL_6945705	2021-11-17	21J	AY.25	B.1.617.2.25	21J	Delta	21J (Delta)	0	good	35	13	0	0	275	0	30	4	0	93	89146	55	29836	0.986757	false	G210T,C241T,C3037T,G4181T,C6402T,C7124T,C8986T,G9053T,C10029T,A11201G,A11332G,C14408T,G15451A,C16466T,C19220T,G20102T,C21618G,T22917G,C22995A,A23403G,C23604G,G24410A,C25469T,G26107C,C26611T,T26767C,A27507C,T27638C,C27752T,C27874T,A28461G,G28881T,G28916T,G29402T,G29742T	22029-22034,28248-28253,28271			M:T30I,M:I82T,N:D63G,N:R203M,N:G215C,N:D377Y,ORF1a:A1306S,ORF1a:P2046L,ORF1a:P2287S,ORF1a:V2930L,ORF1a:T3255I,ORF1a:T3646A,ORF1b:P314L,ORF1b:G662S,ORF1b:P1000L,ORF1b:A1918V,ORF1b:S2212I,ORF3a:S26L,ORF3a:E239Q,ORF7a:V82A,ORF7a:T120I,ORF7b:T40I,ORF9b:T60A,S:T19R,S:R158G,S:L452R,S:T478K,S:D614G,S:P681R,S:D950N	ORF8:D119-,ORF8:F120-,S:E156-,S:F157-				G20102T,C26611T	0	0	2	2	1977,21717-21990	ORF1a:571,S:52-143		3000	0	good	275	10	0
hCoV-19/USA/WI-MHDL-2021110369/2021|EPI_ISL_6945706|2021-11-17	hCoV-19/USA/WI-MHDL-2021110369/2021	EPI_ISL_6945706	2021-11-17	21J	AY.25	B.1.617.2.25	21J	Delta	21J (Delta)	0.992606	good	37	13	0	0	569	0	30	4	0	191	89138	55	29836	0.976925	false	G210T,C241T,C2395T,C3037T,G4181T,C6402T,C7124T,C8986T,G9053T,C10029T,A11201G,A11332G,A13869G,C14408T,G15451A,C16466T,C19220T,C21618G,T22917G,C22995A,C23127T,A23403G,C23604G,G24410A,C25469T,G26107C,T26767C,A27262G,A27507C,T27638C,C27752T,C27874T,A28461G,G28881T,G28916T,G29402T,G29742T	22029-22034,28248-28253,28271			M:I82T,N:D63G,N:R203M,N:G215C,N:D377Y,ORF1a:A1306S,ORF1a:P2046L,ORF1a:P2287S,ORF1a:V2930L,ORF1a:T3255I,ORF1a:T3646A,ORF1b:P314L,ORF1b:G662S,ORF1b:P1000L,ORF1b:A1918V,ORF3a:S26L,ORF3a:E239Q,ORF6:T21A,ORF7a:V82A,ORF7a:T120I,ORF7b:T40I,ORF9b:T60A,S:T19R,S:R158G,S:L452R,S:T478K,S:A522V,S:D614G,S:P681R,S:D950N	ORF8:D119-,ORF8:F120-,S:E156-,S:F157-			C2395T|21C	A13869G,C23127T,A27262G	0	1	3	4	19276-19570,21717-21990	ORF1b:1937-2035,S:52-143		3000	9.96296	good	569	10	0
hCoV-19/USA/WI-UW-6489/2021|EPI_ISL_7452551|2021-11-17	hCoV-19/USA/WI-UW-6489/2021	EPI_ISL_7452551	2021-11-17	21J	AY.103	B.1.617.2.103	21J	Delta	21J (Delta)	9.86544	good	41	7	0	0	1078	0	32	2	0	362	88944	55	29768	0.95763	false	G210T,C241T,C1284T,C2147T,C3037T,G4181T,C4543A,C6402T,C7124T,C8986T,G9053T,C10029T,C10340T,A11201G,A11332G,C11752A,G13201A,C14408T,G15451A,C16466T,A17236G,C19220T,C21618G,T22917G,C22995A,A23403G,C23604G,C24208T,G24410A,C25469T,T26767C,A27345T,T27638C,C27752T,C27874T,A28461G,G28703T,G28881T,G28916T,G29402T,G29742T	28248-28253,28271			M:I82T,N:D63G,N:D144Y,N:R203M,N:G215C,N:D377Y,ORF1a:T340I,ORF1a:L628F,ORF1a:A1306S,ORF1a:P2046L,ORF1a:P2287S,ORF1a:V2930L,ORF1a:T3255I,ORF1a:P3359S,ORF1a:T3646A,ORF1b:P314L,ORF1b:G662S,ORF1b:P1000L,ORF1b:I1257V,ORF1b:A1918V,ORF3a:S26L,ORF6:K48N,ORF7a:V82A,ORF7a:T120I,ORF7b:T40I,ORF9b:T60A,S:T19R,S:L452R,S:T478K,S:D614G,S:P681R,S:D950N	ORF8:D119-,ORF8:F120-			A27345T|21I	C1284T,C2147T,C4543A,C10340T,C11752A,G13201A,G28703T	0	1	7	8	9379-9705,11074-11075,21789-22537	ORF1a:3038-3147,ORF1a:3603-3604,S:76-325		3000	28.8148	good	1078	10	0
hCoV-19/USA/WI-UW-6508/2021|EPI_ISL_7452571|2021-11-17	hCoV-19/USA/WI-UW-6508/2021	EPI_ISL_7452571	2021-11-17	21J	AY.103	B.1.617.2.103	21J	Delta	21J (Delta)	59.8119	mediocre	38	8	0	1	797	0	28	4	0	1068	88946	55	29768	0.967027	false	C186T,G210T,C241T,C3037T,G4181T,C6402T,G6421T,C7124T,C8986T,G9053T,C10029T,A11201G,A11332G,C14408T,G15451A,C16466T,A17236G,C19220T,C21005T,C21618G,A22862G,T22917G,C22995A,A23403G,C23604G,C24208T,G24410A,C25469T,T26767C,T27291C,T27638C,C27752T,C27874T,A28461G,G28881T,G28916T,G29402T,G29742T	11075,28248-28253,28271		ORF1a:3605-4401	M:I82T,N:D63G,N:R203M,N:G215C,N:D377Y,ORF1a:A1306S,ORF1a:P2046L,ORF1a:P2287S,ORF1a:V2930L,ORF1a:T3255I,ORF1b:P314L,ORF1b:G662S,ORF1b:P1000L,ORF1b:I1257V,ORF1b:A1918V,ORF1b:A2513V,ORF3a:S26L,ORF7a:V82A,ORF7a:T120I,ORF7b:T40I,ORF9b:T60A,S:T19R,S:I434V,S:L452R,S:T478K,S:D614G,S:P681R,S:D950N	ORF1a:F3603-,ORF1a:F3604-,ORF8:D119-,ORF8:F120-			T27291C|21J	C186T,G6421T,C21005T,A22862G	0	1	4	5	2236,5305,21621-21623,21628-21638,21703-22113,22136-22240,22273-22537	ORF1a:657,ORF1a:1680,ORF1a:3605-4401,S:20-26,S:47-184,S:192-226,S:237-325		3000	18.4074	good	797	10	0
hCoV-19/USA/WI-WSLH-221741/2021|EPI_ISL_7951165|2021-11-17	hCoV-19/USA/WI-WSLH-221741/2021	EPI_ISL_7951165	2021-11-17	21J	AY.103	B.1.617.2.103	21J	Delta	21J (Delta)	0.651907	good	41	13	0	0	518	0	33	4	0	175	89122	55	29836	0.978631	false	G210T,C241T,C3037T,C3096T,G4181T,C6402T,G6439C,C7124T,T8461C,C8986T,G9053T,C10029T,A11201G,A11332G,C14408T,G15451A,C16466T,A17236G,C19220T,A21371T,C21618G,C22624T,T22917G,C22995A,A23403G,C23604G,C24208T,G24410A,C25006T,C25469T,T25969G,T26767C,T27638C,C27752T,G27754T,C27874T,A28461G,G28881T,G28916T,G29402T,G29742T	22029-22034,28248-28253,28271			M:I82T,N:D63G,N:R203M,N:G215C,N:D377Y,ORF1a:S944L,ORF1a:A1306S,ORF1a:P2046L,ORF1a:Q2058H,ORF1a:P2287S,ORF1a:V2930L,ORF1a:T3255I,ORF1a:T3646A,ORF1b:P314L,ORF1b:G662S,ORF1b:P1000L,ORF1b:I1257V,ORF1b:A1918V,ORF1b:Q2635L,ORF3a:S26L,ORF3a:W193G,ORF7a:V82A,ORF7a:T120I,ORF7a:E121*,ORF7b:T40I,ORF9b:T60A,S:T19R,S:R158G,S:L452R,S:T478K,S:D614G,S:P681R,S:D950N	ORF8:D119-,ORF8:F120-,S:E156-,S:F157-				C3096T,G6439C,T8461C,A21371T,C22624T,C25006T,T25969G,G27754T	0	0	8	8	21717-21990,22312-22542,23132-23144	S:52-143,S:250-327,S:524-528		3000	8.07407	good	518	10	0
hCoV-19/USA/WI-WSLH-221742/2021|EPI_ISL_7951166|2021-11-17	hCoV-19/USA/WI-WSLH-221742/2021	EPI_ISL_7951166	2021-11-17	21J	AY.103	B.1.617.2.103	21J	Delta	21J (Delta)	0.505679	good	41	13	0	0	492	0	33	4	0	165	89122	55	29836	0.9795	false	G210T,C241T,C3037T,C3096T,G4181T,C6402T,G6439C,C7124T,T8461C,C8986T,G9053T,C10029T,A11201G,A11332G,C14408T,G15451A,C16466T,A17236G,C19220T,A21371T,C21618G,C22624T,T22917G,C22995A,A23403G,C23604G,C24208T,G24410A,C25006T,C25469T,T25969G,T26767C,T27638C,C27752T,G27754T,C27874T,A28461G,G28881T,G28916T,G29402T,G29742T	22029-22034,28248-28253,28271			M:I82T,N:D63G,N:R203M,N:G215C,N:D377Y,ORF1a:S944L,ORF1a:A1306S,ORF1a:P2046L,ORF1a:Q2058H,ORF1a:P2287S,ORF1a:V2930L,ORF1a:T3255I,ORF1a:T3646A,ORF1b:P314L,ORF1b:G662S,ORF1b:P1000L,ORF1b:I1257V,ORF1b:A1918V,ORF1b:Q2635L,ORF3a:S26L,ORF3a:W193G,ORF7a:V82A,ORF7a:T120I,ORF7a:E121*,ORF7b:T40I,ORF9b:T60A,S:T19R,S:R158G,S:L452R,S:T478K,S:D614G,S:P681R,S:D950N	ORF8:D119-,ORF8:F120-,S:E156-,S:F157-				C3096T,G6439C,T8461C,A21371T,C22624T,C25006T,T25969G,G27754T	0	0	8	8	21717-21990,22325-22542	S:52-143,S:255-327		3000	7.11111	good	492	10	0
hCoV-19/USA/WI-MHDL-2021120026/2021|EPI_ISL_7153329|2021-11-18	hCoV-19/USA/WI-MHDL-2021120026/2021	EPI_ISL_7153329	2021-11-18	21I	AY.37	B.1.617.2.37	21I	Delta	21I (Delta)	25	good	44	13	0	0	274	0	31	4	0	92	89110	55	29836	0.986791	false	G210T,C241T,G2185T,C2509T,C3037T,C4320T,C5184T,C5497T,A5584G,C9891T,G11083T,T11418C,C11514T,C13019T,C14408T,G15451A,C16466T,C17745T,C18167T,A19051C,C19402T,T20911C,C21618G,C22227T,G22661C,T22917G,T22981C,C22995A,A23403G,C23604G,C24023T,G24410A,C25469T,T26767C,T27638C,C27752T,A28461G,C28638T,G28881T,G29402T,C29541T,C29666T,G29736T,G29742T	22029-22034,28248-28253,28271			M:I82T,N:D63G,N:P122L,N:R203M,N:D377Y,ORF1a:E640D,ORF1a:A1352V,ORF1a:P1640L,ORF1a:A3209V,ORF1a:L3606F,ORF1a:V3718A,ORF1a:T3750I,ORF1b:P314L,ORF1b:G662S,ORF1b:P1000L,ORF1b:P1567L,ORF1b:I1862L,ORF1b:H1979Y,ORF3a:S26L,ORF7a:V82A,ORF7a:T120I,ORF9b:T60A,S:T19R,S:R158G,S:A222V,S:V367L,S:L452R,S:T478K,S:D614G,S:P681R,S:D950N	ORF8:D119-,ORF8:F120-,S:E156-,S:F157-			G11083T|21J&19A,C29666T|22B	C4320T,C5497T,C17745T,C18167T,A19051C,C19402T,G22661C,T22981C,C24023T,C28638T,C29541T,G29736T	0	2	12	14	21717-21990	S:52-143		3000	0	good	274	10	0
hCoV-19/USA/WI-MHDL-2021120027/2021|EPI_ISL_7153352|2021-11-18	hCoV-19/USA/WI-MHDL-2021120027/2021	EPI_ISL_7153352	2021-11-18	21I	AY.37	B.1.617.2.37	21I	Delta	21I (Delta)	25.7257	good	44	13	0	0	530	0	31	4	0	178	89110	55	29836	0.97823	false	G210T,C241T,G2185T,C2509T,C3037T,C4320T,C5184T,C5497T,A5584G,C9891T,G11083T,T11418C,C11514T,C13019T,C14408T,G15451A,C16466T,C17745T,C18167T,A19051C,C19402T,T20911C,C21618G,C22227T,G22661C,T22917G,T22981C,C22995A,A23403G,C23604G,C24023T,G24410A,C25469T,T26767C,T27638C,C27752T,A28461G,C28638T,G28881T,G29402T,C29541T,C29666T,G29736T,G29742T	22029-22034,28248-28253,28271			M:I82T,N:D63G,N:P122L,N:R203M,N:D377Y,ORF1a:E640D,ORF1a:A1352V,ORF1a:P1640L,ORF1a:A3209V,ORF1a:L3606F,ORF1a:V3718A,ORF1a:T3750I,ORF1b:P314L,ORF1b:G662S,ORF1b:P1000L,ORF1b:P1567L,ORF1b:I1862L,ORF1b:H1979Y,ORF3a:S26L,ORF7a:V82A,ORF7a:T120I,ORF9b:T60A,S:T19R,S:R158G,S:A222V,S:V367L,S:L452R,S:T478K,S:D614G,S:P681R,S:D950N	ORF8:D119-,ORF8:F120-,S:E156-,S:F157-			G11083T|21J&19A,C29666T|22B	C4320T,C5497T,C17745T,C18167T,A19051C,C19402T,G22661C,T22981C,C24023T,C28638T,C29541T,G29736T	0	2	12	14	4403-4658,21717-21990	ORF1a:1380-1465,S:52-143		3000	8.51852	good	530	10	0
hCoV-19/USA/WI-MHDL-2021120028/2021|EPI_ISL_7153341|2021-11-18	hCoV-19/USA/WI-MHDL-2021120028/2021	EPI_ISL_7153341	2021-11-18	21I	AY.37	B.1.617.2.37	21I	Delta	21I (Delta)	25	good	44	13	0	0	298	0	31	4	0	101	89110	55	29836	0.985988	false	G210T,C241T,G2185T,C2509T,C3037T,C4320T,C5184T,C5497T,A5584G,C9891T,G11083T,T11418C,C11514T,C13019T,C14408T,G15451A,C16466T,C17745T,C18167T,A19051C,C19402T,T20911C,C21618G,C22227T,G22661C,T22917G,T22981C,C22995A,A23403G,C23604G,C24023T,G24410A,C25469T,T26767C,T27638C,C27752T,A28461G,C28638T,G28881T,G29402T,C29541T,C29666T,G29736T,G29742T	22029-22034,28248-28253,28271			M:I82T,N:D63G,N:P122L,N:R203M,N:D377Y,ORF1a:E640D,ORF1a:A1352V,ORF1a:P1640L,ORF1a:A3209V,ORF1a:L3606F,ORF1a:V3718A,ORF1a:T3750I,ORF1b:P314L,ORF1b:G662S,ORF1b:P1000L,ORF1b:P1567L,ORF1b:I1862L,ORF1b:H1979Y,ORF3a:S26L,ORF7a:V82A,ORF7a:T120I,ORF9b:T60A,S:T19R,S:R158G,S:A222V,S:V367L,S:L452R,S:T478K,S:D614G,S:P681R,S:D950N	ORF8:D119-,ORF8:F120-,S:E156-,S:F157-			G11083T|21J&19A,C29666T|22B	C4320T,C5497T,C17745T,C18167T,A19051C,C19402T,G22661C,T22981C,C24023T,C28638T,C29541T,G29736T	0	2	12	14	4403-4658,21949-21990	ORF1a:1380-1465,S:129-143		3000	0	good	298	10	0
hCoV-19/USA/WI-MHDL-2021120091/2021|EPI_ISL_7809447|2021-11-18	hCoV-19/USA/WI-MHDL-2021120091/2021	EPI_ISL_7809447	2021-11-18	21J	AY.103	B.1.617.2.103	21J	Delta	21J (Delta)	58.8457	mediocre	36	13	0	0	735	0	28	4	0	251	89211	39	29843	0.972143	false	G210T,C241T,G702T,C884T,C3037T,G4181T,C6402T,G6421T,C7124T,C8986T,G9053T,C10029T,A11201G,A11332G,C14408T,G15451A,C16466T,A17236G,C19220T,C21618G,T22917G,C22995A,A23403G,C23604G,C24208T,G24410A,C25469T,G25494T,T26767C,T27291C,C27874T,A28461G,G28881T,G28916T,G29402T,G29742T	22029-22034,28248-28253,28271			M:I82T,N:D63G,N:R203M,N:G215C,N:D377Y,ORF1a:G146V,ORF1a:R207C,ORF1a:A1306S,ORF1a:P2046L,ORF1a:P2287S,ORF1a:V2930L,ORF1a:T3255I,ORF1a:T3646A,ORF1b:P314L,ORF1b:G662S,ORF1b:P1000L,ORF1b:I1257V,ORF1b:A1918V,ORF3a:S26L,ORF7b:T40I,ORF9b:T60A,S:T19R,S:R158G,S:L452R,S:T478K,S:D614G,S:P681R,S:D950N	ORF8:D119-,ORF8:F120-,S:E156-,S:F157-		A21987G,C27638T,T27752C	T27291C|21J	G702T,C884T,G6421T,G25494T	3	1	4	8	2717-2740,2754-2793,5262-5263,19298-19536,21162-21223,21239-21377,21755-21763,21795-21798,21896-21929,27535-27632,27647-27730	ORF1a:818-825,ORF1a:830-843,ORF1a:1666,ORF1b:1944-2023,ORF1b:2565-2586,ORF1b:2591-2637,ORF7a:48-80,ORF7a:85-113,S:65-67,S:78-79,S:112-123		3000	16.1111	good	735	10	0
hCoV-19/USA/WI-UW-6480/2021|EPI_ISL_7452540|2021-11-18	hCoV-19/USA/WI-UW-6480/2021	EPI_ISL_7452540	2021-11-18	21J	AY.3	B.1.617.2.3	21J	Delta	21J (Delta)	4.05556	good	41	7	0	0	795	0	31	2	0	269	88944	55	29768	0.967094	false	G210T,C241T,G1590A,A1876T,C3037T,G4181T,C6402T,C7124T,C8986T,G9053T,C10029T,A11201G,A11332G,A11456G,C12784T,C14408T,G15451A,C16466T,C18839T,C19220T,C21618G,T22917G,C22995A,A23403G,A23416G,C23604G,G24410A,C25469T,G25785T,T26767C,T27638C,C27752T,C27874T,G28086T,A28461G,G28881T,G28916T,G29050A,G29402T,C29509T,G29742T	28248-28253,28271			M:I82T,N:D63G,N:R203M,N:G215C,N:D377Y,ORF1a:G442D,ORF1a:A1306S,ORF1a:P2046L,ORF1a:P2287S,ORF1a:V2930L,ORF1a:T3255I,ORF1a:T3646A,ORF1a:I3731V,ORF1b:P314L,ORF1b:G662S,ORF1b:P1000L,ORF1b:A1791V,ORF1b:A1918V,ORF3a:S26L,ORF3a:W131C,ORF7a:V82A,ORF7a:T120I,ORF7b:T40I,ORF8:A65S,ORF9b:T60A,S:T19R,S:L452R,S:T478K,S:D614G,S:P681R,S:D950N	ORF8:D119-,ORF8:F120-			G25785T|20I	G1590A,A1876T,C12784T,C18839T,A23416G,G28086T	0	1	6	7	9379-9746,11074-11075,21901-22325	ORF1a:3038-3161,ORF1a:3603-3604,S:113-255		3000	18.3333	good	795	10	0
hCoV-19/USA/WI-WSLH-221826/2021|EPI_ISL_7951249|2021-11-18	hCoV-19/USA/WI-WSLH-221826/2021	EPI_ISL_7951249	2021-11-18	21J	AY.103	B.1.617.2.103	21J	Delta	21J (Delta)	47.3723	mediocre	41	7	0	0	762	0	30	2	0	258	89148	55	29836	0.970471	false	G210T,C241T,C3037T,G4181T,C6402T,T6661C,C7124T,C8140T,C8986T,G9053T,C10029T,A11201G,A11332G,C11750T,G12202T,C14120T,C14408T,G15451A,C16466T,G16647T,A17236G,C19220T,C21618G,C22995A,A23403G,C23604G,C24208T,G24410A,C25469T,T26767C,T27291C,G27459A,T27638C,C27752T,C27874T,G27967A,A28461G,G28881T,G28916T,G29402T,G29742T	28248-28253,28271			M:I82T,N:D63G,N:R203M,N:G215C,N:D377Y,ORF1a:A1306S,ORF1a:P2046L,ORF1a:P2287S,ORF1a:V2930L,ORF1a:T3255I,ORF1a:T3646A,ORF1a:L3829F,ORF1a:K3979N,ORF1b:P218L,ORF1b:P314L,ORF1b:G662S,ORF1b:P1000L,ORF1b:I1257V,ORF1b:A1918V,ORF3a:S26L,ORF7a:V82A,ORF7a:T120I,ORF7b:T40I,ORF8:C25Y,ORF9b:T60A,S:T19R,S:T478K,S:D614G,S:P681R,S:D950N	ORF8:D119-,ORF8:F120-			C8140T|22A,C11750T|22E&22B&23B,C14120T|20I,G16647T|20F,T27291C|21J	T6661C,G12202T,G27459A,G27967A	0	5	4	9	20495-20496,21717-22061,22271-22556,22878-22936,23074-23079,23081-23144	ORF1b:2343,S:52-167,S:237-332,S:439-458,S:504-528		3000	17.1111	good	762	10	0
hCoV-19/USA/WI-WSLH-221829/2021|EPI_ISL_7951252|2021-11-18	hCoV-19/USA/WI-WSLH-221829/2021	EPI_ISL_7951252	2021-11-18	21J	AY.43	B.1.617.2.43	21J	Delta	21J (Delta)	0.663923	good	36	13	0	0	520	0	32	4	0	174	89142	55	29836	0.978564	false	G210T,C241T,C3037T,G4181T,C6402T,C7124T,G7283A,C8986T,G9053T,C10029T,A11201G,A11332G,C14408T,G15451A,C15952A,C16466T,C18744T,C19220T,G20487T,C21618G,T22917G,C22995A,A23403G,C23604G,G24410A,C25469T,T26767C,T27638C,C27752T,C27874T,A28299T,A28461G,G28881T,G28916T,G29402T,G29742T	22029-22034,28248-28253,28271			M:I82T,N:Q9L,N:D63G,N:R203M,N:G215C,N:D377Y,ORF1a:A1306S,ORF1a:P2046L,ORF1a:P2287S,ORF1a:V2340I,ORF1a:V2930L,ORF1a:T3255I,ORF1a:T3646A,ORF1b:P314L,ORF1b:G662S,ORF1b:L829I,ORF1b:P1000L,ORF1b:A1918V,ORF1b:K2340N,ORF3a:S26L,ORF7a:V82A,ORF7a:T120I,ORF7b:T40I,ORF9b:S6C,ORF9b:T60A,S:T19R,S:R158G,S:L452R,S:T478K,S:D614G,S:P681R,S:D950N	ORF8:D119-,ORF8:F120-,S:E156-,S:F157-		T24130C		G7283A,G20487T	1	0	2	3	21717-22006,22313-22542	S:52-148,S:251-327		3000	8.14815	good	520	10	0
hCoV-19/USA/WI-MHDL-2021120020/2021|EPI_ISL_7153332|2021-11-19	hCoV-19/USA/WI-MHDL-2021120020/2021	EPI_ISL_7153332	2021-11-19	21J	AY.103	B.1.617.2.103	21J	Delta	21J (Delta)	0.173611	good	39	13	0	0	274	0	30	4	0	92	89130	55	29836	0.986791	false	G210T,C241T,C906T,C3037T,G4181T,C6402T,G6421T,C7124T,C7420T,C8986T,G9053T,C10029T,A11201G,A11332G,C14408T,G15451A,C16466T,A17236G,A18840G,C19145T,C19220T,C21618G,T22917G,C22995A,A23403G,C23604G,C24208T,G24410A,C25469T,T26767C,T27291C,T27638C,C27752T,C27874T,A28461G,G28881T,G28916T,G29402T,G29742T	22029-22034,28248-28253,28271			M:I82T,N:D63G,N:R203M,N:G215C,N:D377Y,ORF1a:T214I,ORF1a:A1306S,ORF1a:P2046L,ORF1a:P2287S,ORF1a:V2930L,ORF1a:T3255I,ORF1a:T3646A,ORF1b:P314L,ORF1b:G662S,ORF1b:P1000L,ORF1b:I1257V,ORF1b:S1893F,ORF1b:A1918V,ORF3a:S26L,ORF7a:V82A,ORF7a:T120I,ORF7b:T40I,ORF9b:T60A,S:T19R,S:R158G,S:L452R,S:T478K,S:D614G,S:P681R,S:D950N	ORF8:D119-,ORF8:F120-,S:E156-,S:F157-			T27291C|21J	C906T,G6421T,C7420T,A18840G,C19145T	0	1	5	6	21717-21990	S:52-143		3000	0	good	274	10	0
hCoV-19/USA/WI-MHDL-2021120021/2021|EPI_ISL_7153335|2021-11-19	hCoV-19/USA/WI-MHDL-2021120021/2021	EPI_ISL_7153335	2021-11-19	21I	AY.47	B.1.617.2.47	21I	Delta	21I (Delta)	0	good	40	13	0	0	274	0	32	4	0	92	89126	55	29836	0.986791	false	G210T,C241T,C527T,C1684T,G2525A,C3037T,C3177T,G5164T,C5184T,A5584G,C9891T,C10376T,C10632T,T11418C,C11514T,C12049T,C13019T,C14408T,G15451A,C16466T,C21618G,C22227T,G22427A,T22917G,C22995A,A23403G,C23604G,G24410A,C25469T,A25574G,T26767C,T27638C,C27752T,G28326T,A28461G,G28881T,G29179T,G29402T,C29537T,G29742T	22029-22034,28248-28253,28271			M:I82T,N:G18V,N:D63G,N:R203M,N:D377Y,ORF1a:E754K,ORF1a:P971L,ORF1a:E1633D,ORF1a:P1640L,ORF1a:A3209V,ORF1a:P3371S,ORF1a:A3456V,ORF1a:V3718A,ORF1a:T3750I,ORF1b:P314L,ORF1b:G662S,ORF1b:P1000L,ORF3a:S26L,ORF3a:K61R,ORF7a:V82A,ORF7a:T120I,ORF9b:V15L,ORF9b:T60A,S:T19R,S:R158G,S:A222V,S:V289I,S:L452R,S:T478K,S:D614G,S:P681R,S:D950N	ORF8:D119-,ORF8:F120-,S:E156-,S:F157-				C527T,G2525A,C3177T,C10376T,C10632T,A25574G,G29179T,C29537T	0	0	8	8	21717-21990	S:52-143		3000	0	good	274	10	0
hCoV-19/USA/WI-MHDL-2021120092/2021|EPI_ISL_7809448|2021-11-19	hCoV-19/USA/WI-MHDL-2021120092/2021	EPI_ISL_7809448	2021-11-19	21I	B.1.617.2	B.1.617.2	21I	Delta	21I (Delta)	251.426	bad	36	13	0	0	531	0	25	4	0	177	88941	39	29753	0.975956	false	C203T,G210T,C241T,A610T,T2911G,C3037T,C5184T,A5584G,C9891T,T11418C,C11514T,A12097G,C12525T,C13019T,C14408T,C15141T,T15252C,G15451A,C16466T,C21618G,T22741C,T22917G,C22995A,A23403G,C23604G,G24410A,C25469T,T26767C,C27874T,G28456A,A28461G,G28881T,G28916T,G29050A,G29402T,C29509T	22029-22034,28248-28253,28271			M:I82T,N:D63G,N:R203M,N:G215C,N:D377Y,ORF1a:P1640L,ORF1a:A3209V,ORF1a:V3718A,ORF1a:T3750I,ORF1a:I3944M,ORF1a:T4087I,ORF1b:P314L,ORF1b:G662S,ORF1b:P1000L,ORF3a:S26L,ORF7b:T40I,ORF9b:R58K,ORF9b:T60A,S:T19R,S:R158G,S:L452R,S:T478K,S:D614G,S:P681R,S:D950N	ORF8:D119-,ORF8:F120-,S:E156-,S:F157-		A21987G,T22227C,T29742G	T2911G|21I,C27874T|21J,G28916T|21J,G29050A|21J,C29509T|21J	C203T,A610T,A12097G,C12525T,C15141T,T15252C,T22741C,G28456A	3	5	8	16	19298-19556,27528-27791,29687-29694	ORF1b:1944-2030,ORF7a:45-122,ORF7b:1-12		3000	8.55556	good	531	10	0
hCoV-19/USA/WI-UW-6511/2021|EPI_ISL_7452574|2021-11-19	hCoV-19/USA/WI-UW-6511/2021	EPI_ISL_7452574	2021-11-19	21J	AY.25	B.1.617.2.25	21J	Delta	21J (Delta)	6.25	good	42	13	0	0	4	0	34	4	0	3	88749	110	29768	0.991707	false	G210T,C241T,G2494T,C3037T,C3773T,G4181T,C4927T,C6312T,C6402T,C7124T,C7926T,C8986T,G9053T,C10029T,A11201G,A11332G,C14408T,G15451A,C16466T,C19220T,A19251G,C21618G,C21897T,G21987A,T22207C,T22917G,C22995A,A23403G,C23604G,G24410A,C25469T,G26107C,T26767C,A27507C,T27638C,C27752T,C27874T,A28461G,G28881T,G28916T,G29402T,G29742T	22029-22034,28248-28253,28271			M:I82T,N:D63G,N:R203M,N:G215C,N:D377Y,ORF1a:E743D,ORF1a:R1170C,ORF1a:A1306S,ORF1a:T2016I,ORF1a:P2046L,ORF1a:P2287S,ORF1a:A2554V,ORF1a:V2930L,ORF1a:T3255I,ORF1a:T3646A,ORF1b:P314L,ORF1b:G662S,ORF1b:P1000L,ORF1b:A1918V,ORF3a:S26L,ORF3a:E239Q,ORF7a:V82A,ORF7a:T120I,ORF7b:T40I,ORF9b:T60A,S:T19R,S:S112L,S:G142D,S:R158G,S:L452R,S:T478K,S:D614G,S:P681R,S:D950N	ORF8:D119-,ORF8:F120-,S:E156-,S:F157-			C7926T|21J&21K,C21897T|21J	G2494T,C3773T,C4927T,C6312T,A19251G,T22207C	0	2	6	8	5305,11082-11083,11540	ORF1a:1680,ORF1a:3606,ORF1a:3759		3000	0	good	4	10	0
hCoV-19/USA/WI-UW-6517/2021|EPI_ISL_7452580|2021-11-19	hCoV-19/USA/WI-UW-6517/2021	EPI_ISL_7452580	2021-11-19	21J	AY.44	B.1.617.2.44	21J	Delta	21J (Delta)	50.1736	mediocre	48	13	0	0	2	0	37	4	0	2	88890	55	29768	0.993613	false	G210T,C241T,C3037T,G4181T,C6040T,C6402T,C6638T,C7124T,C7926T,C8208T,C8986T,G9053T,C10029T,C10969T,A11201G,A11332G,C12623T,T14014G,C14408T,G15451A,T15492C,C16466T,C16726T,G18412A,C19220T,C21618G,C21904T,G21987A,T22917G,C22995A,A23403G,C23604G,G24410A,C25469T,G25552T,T26767C,T27638C,C27752T,C27874T,G28073T,G28460A,A28461G,G28881T,G28916T,G29402T,G29593T,A29700G,G29742T	22029-22034,28248-28253,28271			M:I82T,N:D63S,N:R203M,N:G215C,N:D377Y,ORF1a:A1306S,ORF1a:P2046L,ORF1a:H2125Y,ORF1a:P2287S,ORF1a:A2554V,ORF1a:T2648I,ORF1a:V2930L,ORF1a:T3255I,ORF1a:T3646A,ORF1a:P4120S,ORF1b:F183V,ORF1b:P314L,ORF1b:G662S,ORF1b:P1000L,ORF1b:H1087Y,ORF1b:V1649I,ORF1b:A1918V,ORF3a:S26L,ORF3a:A54S,ORF7a:V82A,ORF7a:T120I,ORF7b:T40I,ORF8:L60F,ORF9b:T60A,S:T19R,S:G142D,S:R158G,S:L452R,S:T478K,S:D614G,S:P681R,S:D950N	ORF8:D119-,ORF8:F120-,S:E156-,S:F157-			C6638T|21J,C7926T|21J&21K,C16726T|21J,G28073T|21J	C8208T,C10969T,C12623T,T15492C,G18412A,C21904T,G25552T,G28460A,G29593T	0	4	9	13	11074-11075	ORF1a:3603-3604		3000	0	good	2	10	0
hCoV-19/USA/WI-WSLH-221775/2021|EPI_ISL_7951199|2021-11-19	hCoV-19/USA/WI-WSLH-221775/2021	EPI_ISL_7951199	2021-11-19	21J	AY.103	B.1.617.2.103	21J	Delta	21J (Delta)	14.1389	good	35	7	0	0	1290	0	26	2	0	440	89172	55	29836	0.952814	false	G210T,C241T,C3037T,G4181T,C6402T,C7124T,C7165T,C8986T,G9053T,C10029T,A11201G,A11332G,A12466G,C14408T,G15451A,C16466T,A17236G,C18486T,C19220T,C21618G,A23403G,C23604G,C24208T,G24410A,C25469T,T26767C,C27527T,T27638C,C27752T,C27874T,A28461G,G28881T,G28916T,G29402T,G29742T	28248-28253,28271			M:I82T,N:D63G,N:R203M,N:G215C,N:D377Y,ORF1a:A1306S,ORF1a:P2046L,ORF1a:P2287S,ORF1a:V2930L,ORF1a:T3255I,ORF1a:T3646A,ORF1b:P314L,ORF1b:G662S,ORF1b:P1000L,ORF1b:I1257V,ORF1b:A1918V,ORF3a:S26L,ORF7a:P45L,ORF7a:V82A,ORF7a:T120I,ORF7b:T40I,ORF9b:T60A,S:T19R,S:D614G,S:P681R,S:D950N	ORF8:D119-,ORF8:F120-			C7165T|21B,C27527T|21J	A12466G,C18486T	0	2	2	4	652-664,1943-1980,1988-1995,2000-2005,2176-2205,8636-8713,8717-8718,8850-8881,8890-8913,10738-10780,10988-11022,17978-17993,20180-20200,21717-22062,22246-22249,22265-22542,22878-23144,25876-25924	ORF1a:129-133,ORF1a:560-572,ORF1a:575-577,ORF1a:579-580,ORF1a:637-647,ORF1a:2791-2816,ORF1a:2818,ORF1a:2862-2872,ORF1a:2875-2883,ORF1a:3491-3505,ORF1a:3575-3586,ORF1b:1504-1509,ORF1b:2238-2245,ORF3a:162-178,S:52-167,S:228-229,S:235-327,S:439-528		3000	36.6667	mediocre	1290	10	0
hCoV-19/USA/WI-MHDL-2021120093/2021|EPI_ISL_7809449|2021-11-20	hCoV-19/USA/WI-MHDL-2021120093/2021	EPI_ISL_7809449	2021-11-20	21I	B.1.617.2	B.1.617.2	21I	Delta	21I (Delta)	237.674	bad	36	13	0	0	283	0	26	4	0	95	88770	31	29688	0.982343	false	C203T,G210T,C241T,T2911G,C3037T,C5184T,A5584G,C9891T,T11418C,C11514T,A12097G,C12525T,C13019T,C14408T,C15141T,T15252C,G15451A,C16466T,C21618G,T22741C,T22917G,C22995A,A23403G,C23604G,G24410A,C25469T,T26767C,T27638C,C27874T,G28456A,A28461G,G28881T,G28916T,G29050A,G29402T,C29509T	22029-22034,28248-28253,28271			M:I82T,N:D63G,N:R203M,N:G215C,N:D377Y,ORF1a:P1640L,ORF1a:A3209V,ORF1a:V3718A,ORF1a:T3750I,ORF1a:I3944M,ORF1a:T4087I,ORF1b:P314L,ORF1b:G662S,ORF1b:P1000L,ORF3a:S26L,ORF7a:V82A,ORF7b:T40I,ORF9b:R58K,ORF9b:T60A,S:T19R,S:R158G,S:L452R,S:T478K,S:D614G,S:P681R,S:D950N	ORF8:D119-,ORF8:F120-,S:E156-,S:F157-		A21987G,T22227C,T27752C	T2911G|21I,C27874T|21J,G28916T|21J,G29050A|21J,C29509T|21J	C203T,A12097G,C12525T,C15141T,T15252C,T22741C,G28456A	3	5	7	15	19298-19551,27763-27791	ORF1b:1944-2028,ORF7b:3-12		3000	0	good	283	10	0
hCoV-19/USA/WI-MHDL-2021120193/2021|EPI_ISL_7478649|2021-11-20	hCoV-19/USA/WI-MHDL-2021120193/2021	EPI_ISL_7478649	2021-11-20	21J	AY.25	B.1.617.2.25	21J	Delta	21J (Delta)	29.4412	good	43	22	0	0	869	0	32	7	0	291	89088	55	29836	0.966893	false	G210T,C241T,C2841T,C3037T,A3350G,T3442C,G4181T,C6402T,C7124T,C8986T,G9053T,C10029T,A11201G,A11332G,G12801A,C14408T,G15451A,C16466T,C17550T,G18534A,C19220T,T20028C,G20434T,C21618G,G22801T,T22917G,C22995A,A23403G,C23604G,G24410A,C25469T,G26107C,T26767C,G27281T,A27507C,T27638C,C27752T,C27874T,A28461G,G28881T,G28916T,G29402T,G29742T	27541-27555,28248-28253,28271			M:I82T,N:D63G,N:R203M,N:G215C,N:D377Y,ORF1a:A859V,ORF1a:S1029G,ORF1a:A1306S,ORF1a:P2046L,ORF1a:P2287S,ORF1a:V2930L,ORF1a:T3255I,ORF1a:T3646A,ORF1a:R4179K,ORF1b:P314L,ORF1b:G662S,ORF1b:P1000L,ORF1b:A1918V,ORF1b:D2323Y,ORF3a:S26L,ORF3a:E239Q,ORF6:W27L,ORF7a:V82A,ORF7a:T120I,ORF7b:T40I,ORF9b:T60A,S:T19R,S:L452R,S:T478K,S:D614G,S:P681R,S:D950N	ORF7a:A50-,ORF7a:D51-,ORF7a:N52-,ORF7a:K53-,ORF7a:F54-,ORF8:D119-,ORF8:F120-			C2841T|20D,G12801A|21J,G22801T|21J	A3350G,T3442C,C17550T,G18534A,T20028C,G20434T,G27281T	0	3	7	10	19276-19570,21717-22290	ORF1b:1937-2035,S:52-243		3000	21.0741	good	869	10	0
hCoV-19/USA/WI-MHDL-2021120194/2021|EPI_ISL_7478646|2021-11-20	hCoV-19/USA/WI-MHDL-2021120194/2021	EPI_ISL_7478646	2021-11-20	21J	AY.25	B.1.617.2.25	21J	Delta	21J (Delta)	1	good	38	13	0	0	570	0	30	4	0	191	89134	55	29836	0.976892	false	G210T,C241T,C2395T,C3037T,G4181T,T4735C,C6402T,C7124T,C8986T,G9053T,C10029T,A11201G,A11332G,A13869G,C14408T,G15451A,C16466T,C19220T,C21618G,T22917G,C22995A,C23127T,A23403G,C23604G,G24410A,C25469T,G26107C,T26767C,A27262G,A27507C,T27638C,C27752T,C27874T,A28461G,G28881T,G28916T,G29402T,G29742T	22029-22034,28248-28253,28271			M:I82T,N:D63G,N:R203M,N:G215C,N:D377Y,ORF1a:A1306S,ORF1a:P2046L,ORF1a:P2287S,ORF1a:V2930L,ORF1a:T3255I,ORF1a:T3646A,ORF1b:P314L,ORF1b:G662S,ORF1b:P1000L,ORF1b:A1918V,ORF3a:S26L,ORF3a:E239Q,ORF6:T21A,ORF7a:V82A,ORF7a:T120I,ORF7b:T40I,ORF9b:T60A,S:T19R,S:R158G,S:L452R,S:T478K,S:A522V,S:D614G,S:P681R,S:D950N	ORF8:D119-,ORF8:F120-,S:E156-,S:F157-			C2395T|21C	T4735C,A13869G,C23127T,A27262G	0	1	4	5	19276-19570,21717-21990,29733	ORF1b:1937-2035,S:52-143		3000	10	good	570	10	0
hCoV-19/USA/WI-MHDL-2021120230/2021|EPI_ISL_7828311|2021-11-20	hCoV-19/USA/WI-MHDL-2021120230/2021	EPI_ISL_7828311	2021-11-20	21J	AY.44	B.1.617.2.44	21J	Delta	21J (Delta)	76.5625	mediocre	45	13	0	0	260	0	33	4	0	87	89214	39	29856	0.988463	false	G210T,C241T,T595C,C1594T,T3022C,C3037T,G4181T,C6040T,C6402T,C6638T,C7124T,C7926T,C8986T,G9053T,C10029T,A11201G,A11332G,C13115T,C13487T,T14014G,C14408T,G15451A,C16466T,C16726T,C19220T,T19701C,C21618G,T22917G,C22995A,A23403G,C23604G,G24410A,C25469T,T26767C,T27638C,C27752T,C27874T,G28073T,A28461G,G28881T,G28916T,G29402T,T29665C,A29700G,G29742T	22029-22034,28248-28253,28271			M:I82T,N:D63G,N:R203M,N:G215C,N:D377Y,ORF1a:A1306S,ORF1a:P2046L,ORF1a:H2125Y,ORF1a:P2287S,ORF1a:A2554V,ORF1a:V2930L,ORF1a:T3255I,ORF1a:T3646A,ORF1b:A7V,ORF1b:F183V,ORF1b:P314L,ORF1b:G662S,ORF1b:P1000L,ORF1b:H1087Y,ORF1b:A1918V,ORF3a:S26L,ORF7a:V82A,ORF7a:T120I,ORF7b:T40I,ORF8:L60F,ORF9b:T60A,S:T19R,S:R158G,S:L452R,S:T478K,S:D614G,S:P681R,S:D950N	ORF8:D119-,ORF8:F120-,S:E156-,S:F157-		A21987G	C6638T|21J,C7926T|21J&21K,C16726T|21J,G28073T|21J	T595C,C1594T,T3022C,C13115T,C13487T,T19701C,T29665C	1	4	7	12	19298-19557	ORF1b:1944-2030		3000	0	good	260	10	0
hCoV-19/USA/WI-MHDL-2021120231/2021|EPI_ISL_7828312|2021-11-20	hCoV-19/USA/WI-MHDL-2021120231/2021	EPI_ISL_7828312	2021-11-20	21J	AY.39	B.1.617.2.39	21J	Delta	21J (Delta)	64.3158	mediocre	43	13	0	0	646	0	32	4	0	219	89180	50	29853	0.975086	false	G210T,C241T,C1929T,C3037T,G4181T,C6402T,C7124T,C8986T,G9053T,C9264T,C10029T,C10340T,A11201G,A11332G,G13309A,C14408T,G15451A,C16466T,C17004T,C19220T,C21370T,G21372T,C21618G,A21630G,A23403G,C23604G,G24410A,C25469T,T25676C,C26022T,T26767C,G26828T,G27604A,T27638C,C27684T,C27752T,C27874T,A28461G,G28881T,G28916T,C29311T,G29402T,G29742T	22029-22034,28248-28253,28271			M:I82T,N:D63G,N:R203M,N:G215C,N:D377Y,ORF1a:A555V,ORF1a:A1306S,ORF1a:P2046L,ORF1a:P2287S,ORF1a:V2930L,ORF1a:T3000I,ORF1a:T3255I,ORF1a:P3359S,ORF1a:T3646A,ORF1b:P314L,ORF1b:G662S,ORF1b:P1000L,ORF1b:A1918V,ORF1b:Q2635Y,ORF3a:S26L,ORF3a:L95S,ORF7a:V71I,ORF7a:V82A,ORF7a:T120I,ORF7b:T40I,ORF9b:T60A,S:T19R,S:Q23R,S:R158G,S:D614G,S:P681R,S:D950N	ORF8:D119-,ORF8:F120-,S:E156-,S:F157-		G22917T,A22995C	C29311T|21G	C1929T,C9264T,C10340T,G13309A,C17004T,C21370T,A21630G,T25676C,C26022T,G26828T,C27684T	2	1	11	14	19298-19558,21442-21551,21733-21988,22897-22914,23087	ORF1b:1944-2031,ORF1b:2659-2695,S:57-142,S:445-451,S:509		3000	12.8148	good	646	10	0
hCoV-19/USA/WI-MHDL-2021120233/2021|EPI_ISL_7828313|2021-11-20	hCoV-19/USA/WI-MHDL-2021120233/2021	EPI_ISL_7828313	2021-11-20	21J	AY.117	B.1.617.2.117	21J	Delta	21J (Delta)	39.0625	mediocre	46	13	0	0	297	0	37	4	0	99	89210	39	29856	0.987225	false	G210T,C241T,A1808C,G2202T,C2245A,C3037T,A3722G,G4181T,C6402T,C7124T,C8986T,G9053T,C10029T,A11201G,A11332G,G14186T,C14408T,G15451A,G15556A,G15768A,C15810T,C16466T,C16877T,G17790T,C19220T,G20274T,C21618G,T22917G,C22995A,C23373T,A23403G,C23604G,G24199T,G24410A,C25469T,T26767C,A27123G,T27638C,C27752T,C27874T,A28461G,C28708T,G28881T,G28916T,G29402T,G29742T	22029-22034,28248-28253,28271			M:I82T,M:I201V,N:D63G,N:R203M,N:G215C,N:D377Y,ORF1a:K515Q,ORF1a:W646L,ORF1a:I1153V,ORF1a:A1306S,ORF1a:P2046L,ORF1a:P2287S,ORF1a:V2930L,ORF1a:T3255I,ORF1a:T3646A,ORF1b:R240M,ORF1b:P314L,ORF1b:G662S,ORF1b:A697T,ORF1b:P1000L,ORF1b:T1137I,ORF1b:Q1441H,ORF1b:A1918V,ORF1b:M2269I,ORF3a:S26L,ORF7a:V82A,ORF7a:T120I,ORF7b:T40I,ORF9b:T60A,S:T19R,S:R158G,S:L452R,S:T478K,S:T604I,S:D614G,S:P681R,S:D950N	ORF8:D119-,ORF8:F120-,S:E156-,S:F157-		T21846C,A21987G		A1808C,C2245A,A3722G,G15556A,G15768A,C16877T,G17790T,G20274T,C23373T,G24199T,A27123G	2	0	11	13	2264-2512,19498-19500,19504-19548	ORF1a:667-749,ORF1b:2011,ORF1b:2013-2027		3000	0	good	297	10	0
hCoV-19/USA/WI-MHDL-2021120235/2021|EPI_ISL_7829644|2021-11-20	hCoV-19/USA/WI-MHDL-2021120235/2021	EPI_ISL_7829644	2021-11-20	21J	AY.103	B.1.617.2.103	21J	Delta	21J (Delta)	76.5625	mediocre	44	24	0	1	131	0	30	9	0	106	89151	48	29856	0.992476	false	G210T,C241T,C1625T,C2910T,C3037T,G4181T,C6402T,T6661C,C7124T,C7420T,C8986T,G9053T,C10029T,A11201G,A11332G,C14403T,C14408T,C15026T,G15451A,C15810T,C16466T,A17236G,C17375T,C17676T,C19220T,C21618G,A23403G,C23604G,C24208T,G24410A,C25469T,T26767C,T27291C,T27638C,C27752T,C27874T,A27950C,G27967A,A28461G,C28603T,G28881T,G28916T,G29402T,G29742T	22029-22034,27571-27581,28248-28253,28271		ORF7a:64-122	M:I82T,N:D63G,N:R203M,N:G215C,N:D377Y,ORF1a:L454F,ORF1a:T882I,ORF1a:A1306S,ORF1a:P2046L,ORF1a:P2287S,ORF1a:V2930L,ORF1a:T3255I,ORF1a:T3646A,ORF1b:P314L,ORF1b:A520V,ORF1b:G662S,ORF1b:P1000L,ORF1b:I1257V,ORF1b:T1303I,ORF1b:A1918V,ORF3a:S26L,ORF7b:T40I,ORF8:E19D,ORF8:C25Y,ORF9b:T60A,S:T19R,S:R158G,S:D614G,S:P681R,S:D950N	ORF7a:F59-,ORF7a:S60-,ORF7a:T61-,ORF7a:Q62-,ORF7a:F63-,ORF8:D119-,ORF8:F120-,S:E156-,S:F157-		A21987G,G22917T	T27291C|21J	C1625T,C2910T,T6661C,C7420T,C14403T,C15026T,C15810T,C17375T,C17676T,A27950C,G27967A,C28603T	2	1	12	15	1537-1557,21734-21758,21917-21978,22944-22950,22983-22998	ORF1a:424-431,ORF7a:64-122,S:58-66,S:119-139,S:461-463,S:474-479		3000	0	good	131	10	0
hCoV-19/USA/WI-MHDL-2021120237/2021|EPI_ISL_7828315|2021-11-20	hCoV-19/USA/WI-MHDL-2021120237/2021	EPI_ISL_7828315	2021-11-20	21J	AY.25	B.1.617.2.25	21J	Delta	21J (Delta)	8.50694	good	39	13	0	0	19	0	33	4	0	7	89256	31	29854	0.996723	false	G210T,C241T,C683T,C3037T,G3871T,G4181T,C6402T,C7124T,C8986T,G9053T,C10029T,C10340T,A11201G,A11332G,C14408T,T15056C,G15451A,C16466T,C19220T,C21618G,C21897T,T22917G,C22995A,A23403G,C23604G,G24410A,C25469T,G26107C,T26767C,A27507C,T27638C,C27643A,C27752T,C27874T,A28461G,G28881T,G28916T,G29402T,G29742T	22029-22034,28248-28253,28271			M:I82T,N:D63G,N:R203M,N:G215C,N:D377Y,ORF1a:K1202N,ORF1a:A1306S,ORF1a:P2046L,ORF1a:P2287S,ORF1a:V2930L,ORF1a:T3255I,ORF1a:P3359S,ORF1a:T3646A,ORF1b:P314L,ORF1b:I530T,ORF1b:G662S,ORF1b:P1000L,ORF1b:A1918V,ORF3a:S26L,ORF3a:E239Q,ORF7a:V82A,ORF7a:P84T,ORF7a:T120I,ORF7b:T40I,ORF9b:T60A,S:T19R,S:S112L,S:R158G,S:L452R,S:T478K,S:D614G,S:P681R,S:D950N	ORF8:D119-,ORF8:F120-,S:E156-,S:F157-		A21987G	C21897T|21J	C683T,G3871T,C10340T,T15056C,C27643A	1	1	5	7	19539-19557	ORF1b:2024-2030		3000	0	good	19	10	0
hCoV-19/USA/WI-MHDL-2021120238/2021|EPI_ISL_7828316|2021-11-20	hCoV-19/USA/WI-MHDL-2021120238/2021	EPI_ISL_7828316	2021-11-20	21J	AY.103	B.1.617.2.103	21J	Delta	21J (Delta)	39.0625	mediocre	44	13	0	0	254	0	33	4	0	86	89215	39	29855	0.98863	false	G210T,C241T,G2971T,C3037T,G3328T,G4181T,C6402T,T6814G,C7124T,C8986T,G9053T,C10029T,A11201G,A11332G,C11572T,C12525T,C14408T,C14925T,G15451A,C16466T,A17236G,C18744T,C19220T,C21618G,T22917G,C22995A,G23401T,A23403G,C23604G,C24208T,G24410A,C25469T,T26767C,T27291C,T27638C,C27752T,C27874T,G28001T,C28236T,A28461G,G28881T,G28916T,G29402T,G29742T	22029-22034,28248-28253,28271			M:I82T,N:D63G,N:R203M,N:G215C,N:D377Y,ORF1a:M902I,ORF1a:Q1021H,ORF1a:A1306S,ORF1a:P2046L,ORF1a:P2287S,ORF1a:V2930L,ORF1a:T3255I,ORF1a:T3646A,ORF1a:T4087I,ORF1b:P314L,ORF1b:G662S,ORF1b:P1000L,ORF1b:I1257V,ORF1b:A1918V,ORF3a:S26L,ORF7a:V82A,ORF7a:T120I,ORF7b:T40I,ORF8:R115C,ORF9b:T60A,S:T19R,S:R158G,S:L452R,S:T478K,S:Q613H,S:D614G,S:P681R,S:D950N	ORF8:D119-,ORF8:F120-,S:E156-,S:F157-		A21987G	C18744T|21J,T27291C|21J	G2971T,G3328T,T6814G,C11572T,C12525T,C14925T,G23401T,G28001T,C28236T	1	2	9	12	19291-19456,19466-19553	ORF1b:1942-1997,ORF1b:2000-2029		3000	0	good	254	10	0
hCoV-19/USA/WI-WSLH-221815/2021|EPI_ISL_7951238|2021-11-20	hCoV-19/USA/WI-WSLH-221815/2021	EPI_ISL_7951238	2021-11-20	21J	AY.103	B.1.617.2.103	21J	Delta	21J (Delta)	8.49302	good	35	13	0	0	1054	0	28	4	0	355	89146	55	29836	0.960706	false	G210T,C241T,C3037T,G4181T,C5100T,C6402T,G6421T,C7124T,C8986T,G9053T,C10029T,A11201G,A11332G,C14408T,G15451A,C16466T,A17236G,C19220T,C21618G,A23403G,C23604G,C24208T,G24410A,C25469T,G25621T,T26767C,T27291C,T27638C,C27752T,C27874T,A28461G,G28881T,G28916T,G29402T,G29742T	22029-22034,28248-28253,28271			M:I82T,N:D63G,N:R203M,N:G215C,N:D377Y,ORF1a:A1306S,ORF1a:S1612L,ORF1a:P2046L,ORF1a:P2287S,ORF1a:V2930L,ORF1a:T3255I,ORF1a:T3646A,ORF1b:P314L,ORF1b:G662S,ORF1b:P1000L,ORF1b:I1257V,ORF1b:A1918V,ORF3a:S26L,ORF3a:V77F,ORF7a:V82A,ORF7a:T120I,ORF7b:T40I,ORF9b:T60A,S:T19R,S:R158G,S:D614G,S:P681R,S:D950N	ORF8:D119-,ORF8:F120-,S:E156-,S:F157-			C5100T|20H,T27291C|21J	G6421T,G25621T	0	2	2	4	21717-21990,22308-22542,22878-23144,25647-25924	ORF3a:85-178,S:52-143,S:249-327,S:439-528		3000	27.9259	good	1054	10	0
hCoV-19/USA/WI-WSLH-221828/2021|EPI_ISL_7951251|2021-11-20	hCoV-19/USA/WI-WSLH-221828/2021	EPI_ISL_7951251	2021-11-20	21J	AY.118	B.1.617.2.118	21J	Delta	21J (Delta)	22.4932	good	40	16	0	0	1036	1	31	6	0	333	89110	55	29836	0.961275	false	G210T,C241T,T826C,C3037T,G4181T,C4321T,C6040T,C6402T,C7124T,C8986T,G9053T,C10029T,G10271A,A11201G,A11332G,C12880T,C14408T,G15451A,C16466T,C19220T,C21618G,T22917G,C22995A,A23403G,C23604G,G24410A,C25469T,G26567T,T26767C,A27338T,T27638C,C27752T,C27874T,A28461G,G28881T,G28916T,A29371G,G29395T,G29402T,G29742T	22029-22034,27759-27761,28248-28253,28271			M:K15N,M:I82T,N:D63G,N:R203M,N:G215C,N:K374N,N:D377Y,ORF1a:A1306S,ORF1a:P2046L,ORF1a:P2287S,ORF1a:V2930L,ORF1a:T3255I,ORF1a:V3336I,ORF1a:T3646A,ORF1b:P314L,ORF1b:G662S,ORF1b:P1000L,ORF1b:A1918V,ORF3a:S26L,ORF6:E46V,ORF7a:V82A,ORF7a:T120I,ORF7b:T40I,ORF9b:T60A,S:T19R,S:R158G,S:L452R,S:T478K,S:D614G,S:P681R,S:D950N	ORF7a:*122-,ORF7b:I2-,ORF8:D119-,ORF8:F120-,S:E156-,S:F157-			C4321T|21L&22B&22E&22C&23A&22A&22D&22F&rec&23B,C6040T|21J,C12880T|21L&22B&22E&22C&23A&22A&22D&22F&rec&23B	G10271A,G26567T,A29371G,G29395T	0	3	4	7	4403-4658,21717-22006,22307-22542,23140-23144,26291-26319,26323-26542	E:16-25,E:27-76,M:1-7,ORF1a:1380-1465,S:5,S:52-148,S:249-327,S:526-528	Y:21575	3000	27.2593	good	1036	10	10
hCoV-19/USA/WI-WSLH-221830/2021|EPI_ISL_7951253|2021-11-20	hCoV-19/USA/WI-WSLH-221830/2021	EPI_ISL_7951253	2021-11-20	21J	AY.103	B.1.617.2.103	21J	Delta	21J (Delta)	3.34864	good	42	13	0	0	504	0	33	4	0	169	89118	55	29836	0.979099	false	T128C,G210T,C241T,C1284T,C2147T,C3037T,G4181T,C4543A,C6402T,C7124T,C8986T,G9053T,C10029T,C10340T,A11201G,A11332G,C11752A,G13201A,C14408T,G15451A,C16466T,A17236G,C19220T,C21618G,G22205C,T22917G,C22995A,A23403G,C23604G,C24208T,G24410A,C25469T,T26767C,A27345T,T27638C,C27752T,C27874T,A28461G,G28881T,G28916T,G29402T,G29742T	22029-22034,28248-28253,28271			M:I82T,N:D63G,N:R203M,N:G215C,N:D377Y,ORF1a:T340I,ORF1a:L628F,ORF1a:A1306S,ORF1a:P2046L,ORF1a:P2287S,ORF1a:V2930L,ORF1a:T3255I,ORF1a:P3359S,ORF1a:T3646A,ORF1b:P314L,ORF1b:G662S,ORF1b:P1000L,ORF1b:I1257V,ORF1b:A1918V,ORF3a:S26L,ORF6:K48N,ORF7a:V82A,ORF7a:T120I,ORF7b:T40I,ORF9b:T60A,S:T19R,S:R158G,S:D215H,S:L452R,S:T478K,S:D614G,S:P681R,S:D950N	ORF8:D119-,ORF8:F120-,S:E156-,S:F157-			A27345T|21I	T128C,C1284T,C2147T,C4543A,C10340T,C11752A,G13201A,G22205C	0	1	8	9	21717-21990,22313-22542	S:52-143,S:251-327		3000	7.55556	good	504	10	0
hCoV-19/USA/WI-WSLH-222072/2021|EPI_ISL_7951488|2021-11-20	hCoV-19/USA/WI-WSLH-222072/2021	EPI_ISL_7951488	2021-11-20	21J	AY.39	B.1.617.2.39	21J	Delta	21J (Delta)	63.4859	mediocre	42	7	0	0	1975	0	30	2	0	669	89144	55	29836	0.929907	false	G210T,C241T,C2110T,C3037T,G3433T,G4181T,C6402T,T6477G,C7124T,C8986T,C8991T,G9053T,C10029T,T10423C,A11201G,A11332G,C12664A,C14408T,G15451A,C16466T,T17124C,C17676T,A18444G,C19220T,G21372T,C21618G,T22917G,C22995A,A23403G,C23604G,G24410A,G25273T,C25469T,T26767C,G27604A,T27638C,C27673T,C27752T,C27874T,A28461G,G29402T,G29742T	28248-28253,28271			M:I82T,N:D63G,N:D377Y,ORF1a:A1306S,ORF1a:P2046L,ORF1a:V2071G,ORF1a:P2287S,ORF1a:A2909V,ORF1a:V2930L,ORF1a:T3255I,ORF1a:T3646A,ORF1b:P314L,ORF1b:G662S,ORF1b:P1000L,ORF1b:A1918V,ORF1b:Q2635H,ORF3a:S26L,ORF7a:V71I,ORF7a:V82A,ORF7a:Q94*,ORF7a:T120I,ORF7b:T40I,ORF9b:T60A,S:T19R,S:L452R,S:T478K,S:D614G,S:P681R,S:D950N,S:M1237I	ORF8:D119-,ORF8:F120-			C2110T|20I,C8991T|21L,T17124C|23A	G3433T,T6477G,T10423C,C12664A,C17676T,A18444G,G25273T,C27673T	0	3	8	11	9835-9873,10080-10099,19276-19291,19537-19570,20232-20813,21428-21512,21637-21645,21655-22563,23070-23083,23087-23144,28757-28782,28806-28830,28837-28907,28916,28922-29007	N:162-170,N:178-186,N:188-212,N:215,N:217-245,ORF1a:3190-3203,ORF1a:3272-3278,ORF1b:1937-1942,ORF1b:2024-2035,ORF1b:2255-2449,ORF1b:2654-2682,S:25-28,S:31-334,S:503-507,S:509-528		3000	62.037	mediocre	1975	10	0
hCoV-19/USA/WI-WSLH-221641/2021|EPI_ISL_7263743|2021-11-21	hCoV-19/USA/WI-WSLH-221641/2021	EPI_ISL_7263743	2021-11-21	21J	AY.25	B.1.617.2.25	21J	Delta	21J (Delta)	9.55535	good	40	7	0	0	1127	0	28	2	0	380	89152	55	29836	0.958265	false	G210T,C241T,G2945T,C3037T,A3126G,G4181T,T5566C,C6402T,C7124T,C8986T,G9053T,C10029T,C10252T,A11201G,A11332G,C11572T,C14408T,G15451A,C16466T,C17676T,C19220T,C21618G,A23403G,C23604G,G24410A,C25469T,G26107C,C26464T,C26611T,T26767C,A27507C,T27638C,C27752T,C27874T,A28461G,G28881T,G28916T,G29402T,C29537T,G29742T	28248-28253,28271			M:T30I,M:I82T,N:D63G,N:R203M,N:G215C,N:D377Y,ORF1a:G894C,ORF1a:D954G,ORF1a:A1306S,ORF1a:P2046L,ORF1a:P2287S,ORF1a:V2930L,ORF1a:T3255I,ORF1a:T3646A,ORF1b:P314L,ORF1b:G662S,ORF1b:P1000L,ORF1b:A1918V,ORF3a:S26L,ORF3a:E239Q,ORF7a:V82A,ORF7a:T120I,ORF7b:T40I,ORF9b:T60A,S:T19R,S:D614G,S:P681R,S:D950N	ORF8:D119-,ORF8:F120-				G2945T,A3126G,T5566C,C10252T,C11572T,C17676T,C26464T,C26611T,C29537T	0	0	9	9	8636,11669-11889,19568-19570,21717-22067,22070-22075,22265-22542,22878-23144	ORF1a:2791,ORF1a:3802-3875,ORF1b:2034-2035,S:52-171,S:235-327,S:439-528		3000	30.6296	mediocre	1127	10	0
hCoV-19/USA/WI-WSLH-221816/2021|EPI_ISL_7951239|2021-11-21	hCoV-19/USA/WI-WSLH-221816/2021	EPI_ISL_7951239	2021-11-21	21J	AY.103	B.1.617.2.103	21J	Delta	21J (Delta)	18.0329	good	41	19	0	0	838	0	31	6	0	282	89105	55	29836	0.96793	false	G210T,C241T,G1335C,C3037T,A3780G,G4181T,G4255A,C5144T,C6402T,C7124T,C7703T,C8986T,G9053T,G9086A,C10029T,A11201G,A11332G,C14408T,G15451A,C16466T,A17236G,C19220T,C21618G,C22224T,A23403G,C23604G,C24208T,G24410A,C25469T,T26767C,T27291C,C27527T,T27638C,C27752T,C27874T,A28461G,G28881T,G28916T,G29402T,G29706C,G29742T	27694-27705,28248-28253,28271			M:I82T,N:D63G,N:R203M,N:G215C,N:D377Y,ORF1a:C357S,ORF1a:N1172S,ORF1a:A1306S,ORF1a:P2046L,ORF1a:P2287S,ORF1a:P2480S,ORF1a:V2930L,ORF1a:G2941S,ORF1a:T3255I,ORF1a:T3646A,ORF1b:P314L,ORF1b:G662S,ORF1b:P1000L,ORF1b:I1257V,ORF1b:A1918V,ORF3a:S26L,ORF7a:P45L,ORF7a:V82A,ORF7a:T120I,ORF7b:T40I,ORF9b:T60A,S:T19R,S:S221L,S:D614G,S:P681R,S:D950N	ORF7a:F101-,ORF7a:L102-,ORF7a:I103-,ORF7a:V104-,ORF8:D119-,ORF8:F120-			T27291C|21J,C27527T|21J	G1335C,A3780G,G4255A,C5144T,C7703T,G9086A,C22224T,G29706C	0	2	8	10	21717-22036,22286-22290,22297-22542,22878-23144	S:52-158,S:242-243,S:245-327,S:439-528		3000	19.9259	good	838	10	0
hCoV-19/USA/WI-WSLH-221817/2021|EPI_ISL_7951240|2021-11-21	hCoV-19/USA/WI-WSLH-221817/2021	EPI_ISL_7951240	2021-11-21	21J	AY.103	B.1.617.2.103	21J	Delta	21J (Delta)	18.5349	good	44	7	0	0	871	0	31	2	0	294	89136	55	29836	0.966826	false	G210T,C241T,A382G,C1437T,C1594T,C2644T,C3037T,G4181T,C6402T,C7124T,C8344T,C8986T,G9053T,C10029T,A11201G,A11332G,C11572T,C14408T,G15451A,C16466T,A17236G,C18086T,C19220T,C21618G,T22917G,C22995A,A23403G,C23604G,C24208T,G24410A,C25469T,C25886T,T26767C,T27291C,T27638C,C27752T,C27847T,C27874T,A28461G,G28881T,G28916T,C29284T,G29402T,G29742T	28248-28253,28271			M:I82T,N:D63G,N:R203M,N:G215C,N:D377Y,ORF1a:S391F,ORF1a:A1306S,ORF1a:P2046L,ORF1a:P2287S,ORF1a:V2930L,ORF1a:T3255I,ORF1a:T3646A,ORF1b:P314L,ORF1b:G662S,ORF1b:P1000L,ORF1b:I1257V,ORF1b:T1540I,ORF1b:A1918V,ORF3a:S26L,ORF3a:S165F,ORF7a:V82A,ORF7a:T120I,ORF7b:S31L,ORF7b:T40I,ORF9b:T60A,S:T19R,S:L452R,S:T478K,S:D614G,S:P681R,S:D950N	ORF8:D119-,ORF8:F120-			C18086T|21I,T27291C|21J	A382G,C1437T,C1594T,C2644T,C8344T,C11572T,C25886T,C27847T,C29284T	0	2	9	11	1623-1897,11852,11859-11889,21717-22034,22290,22298-22542	ORF1a:453-544,ORF1a:3863,ORF1a:3865-3875,S:52-158,S:243,S:246-327		3000	21.1481	good	871	10	0
hCoV-19/USA/WI-WSLH-222240/2021|EPI_ISL_8163539|2021-11-21	hCoV-19/USA/WI-WSLH-222240/2021	EPI_ISL_8163539	2021-11-21	21J	AY.44	B.1.617.2.44	21J	Delta	21J (Delta)	63.1846	mediocre	48	65	0	1	493	0	33	22	0	217	88930	55	29836	0.979467	false	G210T,C241T,C3037T,G4181T,C6040T,C6402T,C6638T,C7124T,C7926T,C8986T,G9053T,C10029T,C10969T,A11201G,A11332G,C12763T,T14014G,C14408T,G15451A,C16466T,C16726T,G18412A,C19220T,C20646T,C21618G,C21998T,T22917G,G22988A,C22995A,A23403G,C23604G,G24410A,T25228C,C25469T,T26767C,T27638C,C27752T,C27874T,G28073T,G28460A,A28461G,G28881T,G28916T,C29119T,G29402T,G29593T,A29700G,G29742T	22029-22034,27555-27606,28248-28253,28271		ORF7a:72-122	M:I82T,N:D63S,N:R203M,N:G215C,N:D377Y,ORF1a:A1306S,ORF1a:P2046L,ORF1a:H2125Y,ORF1a:P2287S,ORF1a:A2554V,ORF1a:V2930L,ORF1a:T3255I,ORF1a:T3646A,ORF1b:F183V,ORF1b:P314L,ORF1b:G662S,ORF1b:P1000L,ORF1b:H1087Y,ORF1b:V1649I,ORF1b:A1918V,ORF3a:S26L,ORF7b:T40I,ORF8:L60F,ORF9b:T60A,S:T19R,S:H146Y,S:R158G,S:L452R,S:G476S,S:T478K,S:D614G,S:P681R,S:D950N	ORF7a:F54-,ORF7a:A55-,ORF7a:L56-,ORF7a:T57-,ORF7a:C58-,ORF7a:F59-,ORF7a:S60-,ORF7a:T61-,ORF7a:Q62-,ORF7a:F63-,ORF7a:A64-,ORF7a:F65-,ORF7a:A66-,ORF7a:C67-,ORF7a:P68-,ORF7a:D69-,ORF7a:G70-,ORF7a:V71-,ORF8:D119-,ORF8:F120-,S:E156-,S:F157-			C6638T|21J,C7926T|21J&21K,C16726T|21J,G28073T|21J	C10969T,C12763T,G18412A,C20646T,C21998T,G22988A,T25228C,G28460A,C29119T,G29593T	0	4	10	14	21717-21990,22324-22542	ORF7a:72-122,S:52-143,S:254-327		3000	7.14815	good	493	10	0
hCoV-19/USA/WI-MHDL-2021120029/2021|EPI_ISL_7153338|2021-11-22	hCoV-19/USA/WI-MHDL-2021120029/2021	EPI_ISL_7153338	2021-11-22	21J	AY.25	B.1.617.2.25	21J	Delta	21J (Delta)	1.5625	good	42	13	0	0	0	0	32	4	0	0	89118	55	29836	0.995954	false	G210T,C241T,C3037T,G4181T,C6402T,C7124T,C8752T,C8986T,G9053T,C9438T,C10029T,C10834T,A11201G,A11332G,C14408T,G15451A,C16466T,C19220T,A19407C,C20451T,C21618G,C21897T,G21987A,T22367C,T22917G,C22995A,A23403G,C23604G,G24410A,C25469T,G26107C,A26759G,T26767C,A27507C,T27638C,C27752T,C27874T,A28461G,G28881T,G28916T,G29402T,G29742T	22029-22034,28248-28253,28271			M:I82T,N:D63G,N:R203M,N:G215C,N:D377Y,ORF1a:A1306S,ORF1a:P2046L,ORF1a:P2287S,ORF1a:V2930L,ORF1a:T3058I,ORF1a:T3255I,ORF1a:T3646A,ORF1b:P314L,ORF1b:G662S,ORF1b:P1000L,ORF1b:A1918V,ORF3a:S26L,ORF3a:E239Q,ORF7a:V82A,ORF7a:T120I,ORF7b:T40I,ORF9b:T60A,S:T19R,S:S112L,S:G142D,S:R158G,S:Y269H,S:L452R,S:T478K,S:D614G,S:P681R,S:D950N	ORF8:D119-,ORF8:F120-,S:E156-,S:F157-			C21897T|21J	C8752T,C9438T,C10834T,A19407C,C20451T,T22367C,A26759G	0	1	7	8				3000	0	good	0	10	0
hCoV-19/USA/WI-MHDL-2021120041/2021|EPI_ISL_7281444|2021-11-22	hCoV-19/USA/WI-MHDL-2021120041/2021	EPI_ISL_7281444	2021-11-22	21J	AY.103	B.1.617.2.103	21J	Delta	21J (Delta)	0.694444	good	40	13	0	0	275	0	32	4	0	93	89126	55	29836	0.986757	false	G210T,C241T,C3037T,G4181T,C4815T,C6402T,T6661C,C7124T,C8986T,G9053T,C9907T,C10029T,A11201G,A11332G,G12794A,C14408T,G15451A,C16466T,A17236G,C19220T,G20069T,C21618G,T22917G,C22995A,A23403G,C23604G,C24208T,G24410A,C25469T,T26767C,T27291C,T27638C,C27752T,C27874T,G27967A,A28461G,G28881T,G28916T,G29402T,G29742T	22029-22034,28248-28253,28271			M:I82T,N:D63G,N:R203M,N:G215C,N:D377Y,ORF1a:A1306S,ORF1a:S1517F,ORF1a:P2046L,ORF1a:P2287S,ORF1a:V2930L,ORF1a:T3255I,ORF1a:T3646A,ORF1a:G4177R,ORF1b:P314L,ORF1b:G662S,ORF1b:P1000L,ORF1b:I1257V,ORF1b:A1918V,ORF1b:G2201V,ORF3a:S26L,ORF7a:V82A,ORF7a:T120I,ORF7b:T40I,ORF8:C25Y,ORF9b:T60A,S:T19R,S:R158G,S:L452R,S:T478K,S:D614G,S:P681R,S:D950N	ORF8:D119-,ORF8:F120-,S:E156-,S:F157-			T27291C|21J	C4815T,T6661C,C9907T,G12794A,G20069T,G27967A	0	1	6	7	21717-21990,24320	S:52-143,S:920		3000	0	good	275	10	0
hCoV-19/USA/WI-MHDL-2021120170/2021|EPI_ISL_7478651|2021-11-22	hCoV-19/USA/WI-MHDL-2021120170/2021	EPI_ISL_7478651	2021-11-22	21J	AY.3	B.1.617.2.3	21J	Delta	21J (Delta)	9.22359	good	41	7	0	0	1120	0	28	2	0	375	88635	55	29665	0.952781	false	G210T,C241T,A1120G,C3037T,G4181T,C4999T,C6016T,C6402T,C7124T,C8986T,G9053T,C10029T,A11201G,A11332G,A11456G,T11522G,C13487T,C14408T,G14414T,G15451A,C16466T,T18402C,C19220T,C21618G,T22917G,C22995A,T23284C,A23403G,C23604G,G24410A,C25339T,C25469T,T26767C,T27638C,C27752T,C27874T,A28461G,G29050A,G29254A,G29402T,C29509T	28248-28253,28271			M:I82T,N:D63G,N:D377Y,ORF1a:A1306S,ORF1a:P2046L,ORF1a:P2287S,ORF1a:V2930L,ORF1a:T3255I,ORF1a:T3646A,ORF1a:I3731V,ORF1a:F3753V,ORF1b:A7V,ORF1b:P314L,ORF1b:S316I,ORF1b:G662S,ORF1b:P1000L,ORF1b:A1918V,ORF3a:S26L,ORF7a:V82A,ORF7a:T120I,ORF7b:T40I,ORF9b:T60A,S:T19R,S:L452R,S:T478K,S:D614G,S:P681R,S:D950N	ORF8:D119-,ORF8:F120-				A1120G,C4999T,C6016T,T11522G,C13487T,G14414T,T18402C,G29254A	0	0	8	8	19276-19570,21717-22290,28757-29007	N:162-245,ORF1b:1937-2035,S:52-243		3000	30.3704	mediocre	1120	10	0
hCoV-19/USA/WI-MHDL-2021120176/2021|EPI_ISL_7478626|2021-11-22	hCoV-19/USA/WI-MHDL-2021120176/2021	EPI_ISL_7478626	2021-11-22	21J	AY.44	B.1.617.2.44	21J	Delta	21J (Delta)	29.3403	good	43	13	0	0	274	0	36	4	0	92	89114	55	29836	0.986791	false	G210T,C241T,C3037T,G4181T,C6040T,C6402T,C6638T,C7124T,C7926T,C8986T,G9053T,C10029T,C11109T,A11201G,A11332G,T14014G,C14408T,G15451A,C16466T,C16726T,C16733T,G16975T,C19220T,C21618G,T22917G,C22995A,G23120T,A23403G,C23604G,G24410A,C25469T,T26767C,T27638C,C27752T,C27874T,G28073T,A28461G,G28881T,G28916T,G29402T,G29573A,A29700G,G29742T	22029-22034,28248-28253,28271			M:I82T,N:D63G,N:R203M,N:G215C,N:D377Y,ORF1a:A1306S,ORF1a:P2046L,ORF1a:H2125Y,ORF1a:P2287S,ORF1a:A2554V,ORF1a:V2930L,ORF1a:T3255I,ORF1a:A3615V,ORF1a:T3646A,ORF1b:F183V,ORF1b:P314L,ORF1b:G662S,ORF1b:P1000L,ORF1b:H1087Y,ORF1b:S1089L,ORF1b:V1170F,ORF1b:A1918V,ORF3a:S26L,ORF7a:V82A,ORF7a:T120I,ORF7b:T40I,ORF8:L60F,ORF9b:T60A,S:T19R,S:R158G,S:L452R,S:T478K,S:A520S,S:D614G,S:P681R,S:D950N	ORF8:D119-,ORF8:F120-,S:E156-,S:F157-			C6638T|21J,C7926T|21J&21K,C16726T|21J,G28073T|21J	C11109T,C16733T,G16975T,G23120T,G29573A	0	4	5	9	21717-21990	S:52-143		3000	0	good	274	10	0
hCoV-19/USA/WI-MHDL-2021120178/2021|EPI_ISL_7478642|2021-11-22	hCoV-19/USA/WI-MHDL-2021120178/2021	EPI_ISL_7478642	2021-11-22	21I	AY.26	B.1.617.2.26	21I	Delta	21I (Delta)	21.6891	good	40	22	0	0	523	0	27	7	0	176	89092	55	29836	0.978464	false	G210T,C241T,C813T,C1513T,T2911G,C3037T,C5184T,A5584G,T7013C,C9891T,T11418C,C11514T,C13019T,C14408T,C15237T,G15451A,C16323T,C16466T,T18900C,C19374T,C21618G,C22227T,A22625C,T22917G,C22995A,A23403G,C23604G,G24410A,G24586T,A24783G,G25352T,C25469T,T26767C,A27345T,T27638C,C27752T,A28461G,G28881T,G29402T,G29742T	686-694,22029-22034,28248-28253,28271			M:I82T,N:D63G,N:R203M,N:D377Y,ORF1a:T183I,ORF1a:P1640L,ORF1a:A3209V,ORF1a:V3718A,ORF1a:T3750I,ORF1b:P314L,ORF1b:G662S,ORF1b:P1000L,ORF3a:S26L,ORF6:K48N,ORF7a:V82A,ORF7a:T120I,ORF9b:T60A,S:T19R,S:R158G,S:A222V,S:L452R,S:T478K,S:D614G,S:P681R,S:D950N,S:N1074S,S:V1264L	ORF1a:K141-,ORF1a:S142-,ORF1a:F143-,ORF8:D119-,ORF8:F120-,S:E156-,S:F157-			T2911G|21I,C13019T|21I	C813T,C1513T,T7013C,C15237T,C16323T,T18900C,C19374T,A22625C,G24586T,A24783G	0	2	10	12	21717-21990,25053-25301	S:52-143,S:1164-1247		3000	8.25926	good	523	10	0
hCoV-19/USA/WI-MHDL-2021120179/2021|EPI_ISL_7478627|2021-11-22	hCoV-19/USA/WI-MHDL-2021120179/2021	EPI_ISL_7478627	2021-11-22	21J	AY.25.1	B.1.617.2.25.1	21J	Delta	21J (Delta)	8.50694	good	44	13	0	0	274	0	34	4	0	92	89110	55	29836	0.986791	false	G210T,C241T,A1194G,T2734C,C3037T,A3948G,G4181T,C6402T,C7124T,A8636G,C8986T,G9053T,C9969T,C10029T,C11050T,A11201G,A11332G,G11562T,T14259C,C14408T,C15108T,G15451A,C16466T,C19220T,C21575T,C21618G,T22917G,C22995A,A23403G,C23604G,G24410A,C25469T,C25584T,G26107C,T26767C,A27507C,T27638C,C27752T,C27874T,A28461G,G28881T,G28916T,G29402T,G29742T	22029-22034,28248-28253,28271			M:I82T,N:D63G,N:R203M,N:G215C,N:D377Y,ORF1a:N310S,ORF1a:D1228G,ORF1a:A1306S,ORF1a:P2046L,ORF1a:P2287S,ORF1a:T2791A,ORF1a:V2930L,ORF1a:A3235V,ORF1a:T3255I,ORF1a:T3646A,ORF1a:C3766F,ORF1b:P314L,ORF1b:G662S,ORF1b:P1000L,ORF1b:A1918V,ORF3a:S26L,ORF3a:E239Q,ORF7a:V82A,ORF7a:T120I,ORF7b:T40I,ORF9b:T60A,S:L5F,S:T19R,S:R158G,S:L452R,S:T478K,S:D614G,S:P681R,S:D950N	ORF8:D119-,ORF8:F120-,S:E156-,S:F157-			C21575T|21J&21F,C25584T|21K&21L&22B&22E&22C&23A&22A&22D&22F&rec&23B	A1194G,T2734C,A8636G,C9969T,C11050T,T14259C,C15108T	0	2	7	9	21717-21990	S:52-143		3000	0	good	274	10	0
hCoV-19/USA/WI-MHDL-2021120180/2021|EPI_ISL_7478647|2021-11-22	hCoV-19/USA/WI-MHDL-2021120180/2021	EPI_ISL_7478647	2021-11-22	21J	AY.3.1	B.1.617.2.3.1	21J	Delta	21J (Delta)	1.12989	good	42	13	0	0	587	0	33	4	0	200	88605	55	29665	0.970605	false	G210T,C241T,C504T,C3037T,G3644T,G4181T,C6402T,C7124T,C8986T,G9053T,C10029T,G10631T,A11201G,A11332G,C11455T,A11456G,C14408T,G15451A,C16466T,C18115T,C19220T,C20199T,C21618G,T22917G,C22995A,T23284C,A23403G,C23604G,A23945G,G24410A,C25339T,C25469T,T26767C,T27638C,C27752T,C27874T,A28461G,G28881T,G28916T,G29050A,G29402T,C29509T	22029-22034,28248-28253,28271			M:I82T,N:D63G,N:R203M,N:G215C,N:D377Y,ORF1a:P80L,ORF1a:D1127Y,ORF1a:A1306S,ORF1a:P2046L,ORF1a:P2287S,ORF1a:V2930L,ORF1a:T3255I,ORF1a:A3456S,ORF1a:T3646A,ORF1a:I3731V,ORF1b:P314L,ORF1b:G662S,ORF1b:P1000L,ORF1b:H1550Y,ORF1b:A1918V,ORF3a:S26L,ORF7a:V82A,ORF7a:T120I,ORF7b:T40I,ORF9b:T60A,S:T19R,S:R158G,S:L452R,S:T478K,S:D614G,S:P681R,S:K795E,S:D950N	ORF8:D119-,ORF8:F120-,S:E156-,S:F157-				C504T,G10631T,C11455T,A23945G	0	0	4	4	20232-20496,21717-21990,22009-22010,24320,27579-27623	ORF1b:2255-2343,ORF7a:62-77,S:52-143,S:149-150,S:920		3000	10.6296	good	587	10	0
hCoV-19/USA/WI-MHDL-2021120181/2021|EPI_ISL_7478628|2021-11-22	hCoV-19/USA/WI-MHDL-2021120181/2021	EPI_ISL_7478628	2021-11-22	21J	AY.44	B.1.617.2.44	21J	Delta	21J (Delta)	56.25	mediocre	48	13	0	0	274	0	36	4	0	92	89094	55	29836	0.986791	false	G210T,C241T,G1406A,C3037T,G4181T,C6040T,C6402T,A6467C,C6638T,C7124T,C7926T,C8986T,G9053T,C10029T,C10969T,A11201G,A11332G,C12763T,T14014G,C14408T,G15451A,C16466T,C16726T,G18412A,C19220T,C20646T,C21618G,T22917G,C22995A,A23403G,C23604G,G24410A,C25469T,C25916T,T26767C,T27638C,C27752T,C27874T,G28073T,G28460A,A28461G,G28881T,G28916T,C29119T,G29402T,G29593T,A29700G,G29742T	22029-22034,28248-28253,28271			M:I82T,N:D63S,N:R203M,N:G215C,N:D377Y,ORF1a:E381K,ORF1a:A1306S,ORF1a:P2046L,ORF1a:T2068P,ORF1a:H2125Y,ORF1a:P2287S,ORF1a:A2554V,ORF1a:V2930L,ORF1a:T3255I,ORF1a:T3646A,ORF1b:F183V,ORF1b:P314L,ORF1b:G662S,ORF1b:P1000L,ORF1b:H1087Y,ORF1b:V1649I,ORF1b:A1918V,ORF3a:S26L,ORF3a:T175I,ORF7a:V82A,ORF7a:T120I,ORF7b:T40I,ORF8:L60F,ORF9b:T60A,S:T19R,S:R158G,S:L452R,S:T478K,S:D614G,S:P681R,S:D950N	ORF8:D119-,ORF8:F120-,S:E156-,S:F157-			C6638T|21J,C7926T|21J&21K,C16726T|21J,G28073T|21J	G1406A,A6467C,C10969T,C12763T,G18412A,C20646T,C25916T,G28460A,C29119T,G29593T	0	4	10	14	21717-21990	S:52-143		3000	0	good	274	10	0
hCoV-19/USA/WI-MHDL-2021120182/2021|EPI_ISL_7478650|2021-11-22	hCoV-19/USA/WI-MHDL-2021120182/2021	EPI_ISL_7478650	2021-11-22	21J	AY.3.1	B.1.617.2.3.1	21J	Delta	21J (Delta)	5.93915	good	41	13	0	0	958	0	31	4	0	324	88609	55	29665	0.958198	false	G210T,C241T,C504T,C3037T,G3644T,G4181T,G4216T,C6402T,C7124T,C8986T,G9053T,C10029T,G10631T,A11201G,A11332G,C11455T,A11456G,C14408T,G15451A,C16466T,C18115T,C19220T,C20199T,C21618G,T22917G,C22995A,T23284C,A23403G,C23604G,G24410A,C25339T,C25469T,T26767C,T27638C,C27752T,C27874T,A28461G,G29050A,G29402T,C29509T,C29614T	22029-22034,28248-28253,28271			M:I82T,N:D63G,N:D377Y,ORF1a:P80L,ORF1a:D1127Y,ORF1a:A1306S,ORF1a:L1317F,ORF1a:P2046L,ORF1a:P2287S,ORF1a:V2930L,ORF1a:T3255I,ORF1a:A3456S,ORF1a:T3646A,ORF1a:I3731V,ORF1b:P314L,ORF1b:G662S,ORF1b:P1000L,ORF1b:H1550Y,ORF1b:A1918V,ORF3a:S26L,ORF7a:V82A,ORF7a:T120I,ORF7b:T40I,ORF9b:T60A,S:T19R,S:R158G,S:L452R,S:T478K,S:D614G,S:P681R,S:D950N	ORF8:D119-,ORF8:F120-,S:E156-,S:F157-			C29614T|22B	C504T,G4216T,G10631T,C11455T	0	1	4	5	19276-19570,20232-20496,21717-21990,27579-27623,28881,28916,28931-29007	N:203,N:215,N:220-245,ORF1b:1937-2035,ORF1b:2255-2343,ORF7a:62-77,S:52-143		3000	24.3704	good	958	10	0
hCoV-19/USA/WI-MHDL-2021120183/2021|EPI_ISL_7478629|2021-11-22	hCoV-19/USA/WI-MHDL-2021120183/2021	EPI_ISL_7478629	2021-11-22	21J	AY.103	B.1.617.2.103	21J	Delta	21J (Delta)	6.25	good	41	13	0	0	274	0	34	4	0	92	89122	55	29836	0.986791	false	G210T,C241T,C882T,G1274T,C1931A,G2891A,C3037T,G4181T,C6402T,C7124T,C8247T,C8986T,G9053T,C10029T,G10642T,A11201G,A11332G,C14408T,G15451A,C16466T,A17236G,C19220T,C21618G,T22917G,C22995A,G23012C,A23403G,C23604G,A23674G,C24208T,G24410A,C25469T,T26767C,T27638C,C27752T,C27874T,A28461G,G28881T,G28916T,G29402T,G29742T	22029-22034,28248-28253,28271			M:I82T,N:D63G,N:R203M,N:G215C,N:D377Y,ORF1a:A206V,ORF1a:V337F,ORF1a:Q556K,ORF1a:A876T,ORF1a:A1306S,ORF1a:P2046L,ORF1a:P2287S,ORF1a:S2661F,ORF1a:V2930L,ORF1a:T3255I,ORF1a:T3646A,ORF1b:P314L,ORF1b:G662S,ORF1b:P1000L,ORF1b:I1257V,ORF1b:A1918V,ORF3a:S26L,ORF7a:V82A,ORF7a:T120I,ORF7b:T40I,ORF9b:T60A,S:T19R,S:R158G,S:L452R,S:T478K,S:E484Q,S:D614G,S:P681R,S:D950N	ORF8:D119-,ORF8:F120-,S:E156-,S:F157-			C1931A|22E&22B,G23012C|21B	C882T,G1274T,G2891A,C8247T,G10642T,A23674G	0	2	6	8	21717-21990	S:52-143		3000	0	good	274	10	0
hCoV-19/USA/WI-MHDL-2021120184/2021|EPI_ISL_7478630|2021-11-22	hCoV-19/USA/WI-MHDL-2021120184/2021	EPI_ISL_7478630	2021-11-22	21J	AY.103	B.1.617.2.103	21J	Delta	21J (Delta)	4.34028	good	43	13	0	0	274	0	32	4	0	92	89114	55	29836	0.986791	false	G210T,C241T,G1335C,G1738T,C3037T,A3780G,G4181T,G4255A,A5450C,C6402T,C7124T,C8986T,G9053T,G9086A,C10029T,A11201G,A11332G,C14408T,A15210G,G15451A,C16466T,A17236G,G19109T,C19220T,T21408C,C21618G,T22917G,C22995A,A23403G,C23604G,C24208T,G24410A,C25469T,T26767C,T27291C,T27638C,C27752T,C27874T,A28461G,G28881T,G28916T,G29402T,G29742T	22029-22034,28248-28253,28271			M:I82T,N:D63G,N:R203M,N:G215C,N:D377Y,ORF1a:C357S,ORF1a:N1172S,ORF1a:A1306S,ORF1a:P2046L,ORF1a:P2287S,ORF1a:V2930L,ORF1a:G2941S,ORF1a:T3255I,ORF1a:T3646A,ORF1b:P314L,ORF1b:G662S,ORF1b:P1000L,ORF1b:I1257V,ORF1b:S1881I,ORF1b:A1918V,ORF3a:S26L,ORF7a:V82A,ORF7a:T120I,ORF7b:T40I,ORF9b:T60A,S:T19R,S:R158G,S:L452R,S:T478K,S:D614G,S:P681R,S:D950N	ORF8:D119-,ORF8:F120-,S:E156-,S:F157-			T27291C|21J	G1335C,G1738T,A3780G,G4255A,A5450C,G9086A,A15210G,G19109T,T21408C	0	1	9	10	21717-21990	S:52-143		3000	0	good	274	10	0
hCoV-19/USA/WI-MHDL-2021120185/2021|EPI_ISL_7478640|2021-11-22	hCoV-19/USA/WI-MHDL-2021120185/2021	EPI_ISL_7478640	2021-11-22	21J	AY.118	B.1.617.2.118	21J	Delta	21J (Delta)	57.8706	mediocre	38	7	0	0	2197	0	28	2	0	716	88296	343	29836	0.912852	false	T826C,C1567T,C3037T,G4181T,T5218C,C6402T,C7124T,C8986T,G9053T,T9643C,C10029T,C10279T,A11201G,A11332G,C14408T,C15352T,G15451A,C16466T,C19220T,C21618G,T22917G,C22995A,A23403G,C23604G,T23728C,G24268T,G24410A,C25469T,C27513T,T27638C,C27752T,C27874T,G28122T,A28461G,G28881T,G28916T,G29402T,G29742T	28248-28253,28271			N:D63G,N:R203M,N:G215C,N:D377Y,ORF1a:A1306S,ORF1a:P2046L,ORF1a:P2287S,ORF1a:V2930L,ORF1a:T3255I,ORF1a:T3646A,ORF1b:P314L,ORF1b:L629F,ORF1b:G662S,ORF1b:P1000L,ORF1b:A1918V,ORF3a:S26L,ORF7a:V82A,ORF7a:T120I,ORF7b:T40I,ORF8:G77C,ORF9b:T60A,S:T19R,S:L452R,S:T478K,S:D614G,S:P681R,S:M902I,S:D950N	ORF8:D119-,ORF8:F120-			C1567T|19B,C27513T|22B	T5218C,T9643C,C10279T,C15352T,T23728C,G24268T,G28122T	0	2	7	9	6847-7058,19276-19570,20232-20496,21717-22290,26291-26860,27191-27471	E:16-76,M:1-113,M:223,ORF1a:26,ORF1a:2194-2265,ORF1b:1937-2035,ORF1b:2255-2343,ORF6:1-62,ORF7a:1-26,S:52-243		3000	70.2593	mediocre	2197	10	0
hCoV-19/USA/WI-MHDL-2021120186/2021|EPI_ISL_7478645|2021-11-22	hCoV-19/USA/WI-MHDL-2021120186/2021	EPI_ISL_7478645	2021-11-22	21J	AY.44	B.1.617.2.44	21J	Delta	21J (Delta)	0.992606	good	36	13	0	0	569	0	29	4	0	191	89142	55	29836	0.976925	false	G210T,C241T,C3037T,G4181T,C6040T,C6402T,C7124T,C7926T,C8947T,C8986T,G9053T,C10029T,A11201G,A11332G,T14014G,C14408T,G15451A,C16466T,C19220T,C21618G,T22917G,C22995A,A23403G,C23604G,G24410A,C25469T,T26767C,T27638C,C27752T,C27874T,A28461G,G28881T,G28916T,G29402T,A29700G,G29742T	22029-22034,28248-28253,28271			M:I82T,N:D63G,N:R203M,N:G215C,N:D377Y,ORF1a:A1306S,ORF1a:P2046L,ORF1a:P2287S,ORF1a:A2554V,ORF1a:V2930L,ORF1a:T3255I,ORF1a:T3646A,ORF1b:F183V,ORF1b:P314L,ORF1b:G662S,ORF1b:P1000L,ORF1b:A1918V,ORF3a:S26L,ORF7a:V82A,ORF7a:T120I,ORF7b:T40I,ORF9b:T60A,S:T19R,S:R158G,S:L452R,S:T478K,S:D614G,S:P681R,S:D950N	ORF8:D119-,ORF8:F120-,S:E156-,S:F157-			C7926T|21J&21K,C8947T|21C		0	2	0	2	19276-19570,21717-21990	ORF1b:1937-2035,S:52-143		3000	9.96296	good	569	10	0
hCoV-19/USA/WI-MHDL-2021120187/2021|EPI_ISL_7478631|2021-11-22	hCoV-19/USA/WI-MHDL-2021120187/2021	EPI_ISL_7478631	2021-11-22	21J	AY.25.1	B.1.617.2.25.1	21J	Delta	21J (Delta)	0	good	40	13	0	0	276	0	33	4	0	93	89126	55	29836	0.986724	false	G210T,C241T,C1076T,G2564A,C3037T,A3948G,G4181T,C6402T,C7124T,C8986T,G9053T,C9430T,C10029T,A11201G,A11332G,G11562T,T14191C,C14408T,G15451A,C16466T,C17134T,C19220T,C21618G,T22917G,C22995A,A23403G,C23604G,G24410A,C25469T,G26107C,T26767C,A27507C,T27638C,C27752T,C27874T,A28461G,G28881T,G28916T,G29402T,G29742T	22029-22034,28248-28253,28271			M:I82T,N:D63G,N:R203M,N:G215C,N:D377Y,ORF1a:P271S,ORF1a:E767K,ORF1a:D1228G,ORF1a:A1306S,ORF1a:P2046L,ORF1a:P2287S,ORF1a:V2930L,ORF1a:T3255I,ORF1a:T3646A,ORF1a:C3766F,ORF1b:P314L,ORF1b:G662S,ORF1b:P1000L,ORF1b:P1223S,ORF1b:A1918V,ORF3a:S26L,ORF3a:E239Q,ORF7a:V82A,ORF7a:T120I,ORF7b:T40I,ORF9b:T60A,S:T19R,S:R158G,S:L452R,S:T478K,S:D614G,S:P681R,S:D950N	ORF8:D119-,ORF8:F120-,S:E156-,S:F157-				C1076T,G2564A,C9430T,T14191C,C17134T	0	0	5	5	21717-21990,24672-24673	S:52-143,S:1037		3000	0	good	276	10	0
hCoV-19/USA/WI-MHDL-2021120188/2021|EPI_ISL_7478632|2021-11-22	hCoV-19/USA/WI-MHDL-2021120188/2021	EPI_ISL_7478632	2021-11-22	21J	AY.103	B.1.617.2.103	21J	Delta	21J (Delta)	1.5625	good	41	13	0	0	274	0	32	4	0	92	89122	55	29836	0.986791	false	G210T,C241T,T2827C,C3037T,G4105T,G4181T,T6096C,C6402T,C7124T,C8986T,G9053T,C10029T,A11201G,A11332G,C11572T,C12624A,C14408T,G15451A,C16466T,A17236G,C19154T,C19220T,T21087C,C21618G,T22917G,C22995A,A23403G,C23604G,C24208T,G24410A,C25469T,T26767C,T27291C,T27638C,C27752T,C27874T,A28461G,G28881T,G28916T,G29402T,G29742T	22029-22034,28248-28253,28271			M:I82T,N:D63G,N:R203M,N:G215C,N:D377Y,ORF1a:K1280N,ORF1a:A1306S,ORF1a:L1944S,ORF1a:P2046L,ORF1a:P2287S,ORF1a:V2930L,ORF1a:T3255I,ORF1a:T3646A,ORF1a:P4120H,ORF1b:P314L,ORF1b:G662S,ORF1b:P1000L,ORF1b:I1257V,ORF1b:T1896I,ORF1b:A1918V,ORF3a:S26L,ORF7a:V82A,ORF7a:T120I,ORF7b:T40I,ORF9b:T60A,S:T19R,S:R158G,S:L452R,S:T478K,S:D614G,S:P681R,S:D950N	ORF8:D119-,ORF8:F120-,S:E156-,S:F157-			T27291C|21J	T2827C,G4105T,T6096C,C11572T,C12624A,C19154T,T21087C	0	1	7	8	21717-21990	S:52-143		3000	0	good	274	10	0
hCoV-19/USA/WI-MHDL-2021120189/2021|EPI_ISL_7478633|2021-11-22	hCoV-19/USA/WI-MHDL-2021120189/2021	EPI_ISL_7478633	2021-11-22	21J	AY.25	B.1.617.2.25	21J	Delta	21J (Delta)	0.173611	good	37	13	0	0	0	0	32	4	0	0	89138	55	29836	0.995954	false	G210T,C241T,C3037T,G4181T,C6402T,C7124T,C8986T,G9053T,C10029T,A11201G,A11332G,C14408T,G15451A,C16466T,C19220T,C21618G,C21897T,G21987A,T22917G,C22995A,A23403G,C23604G,G24410A,C25469T,G26107C,G26144T,C26611T,T26767C,A27507C,T27638C,C27752T,C27874T,A28461G,G28881T,G28916T,G29402T,G29742T	22029-22034,28248-28253,28271			M:T30I,M:I82T,N:D63G,N:R203M,N:G215C,N:D377Y,ORF1a:A1306S,ORF1a:P2046L,ORF1a:P2287S,ORF1a:V2930L,ORF1a:T3255I,ORF1a:T3646A,ORF1b:P314L,ORF1b:G662S,ORF1b:P1000L,ORF1b:A1918V,ORF3a:S26L,ORF3a:E239Q,ORF3a:G251V,ORF7a:V82A,ORF7a:T120I,ORF7b:T40I,ORF9b:T60A,S:T19R,S:S112L,S:G142D,S:R158G,S:L452R,S:T478K,S:D614G,S:P681R,S:D950N	ORF8:D119-,ORF8:F120-,S:E156-,S:F157-			C21897T|21J,G26144T|19A	C26611T	0	2	1	3				3000	0	good	0	10	0
hCoV-19/USA/WI-MHDL-2021120190/2021|EPI_ISL_7478634|2021-11-22	hCoV-19/USA/WI-MHDL-2021120190/2021	EPI_ISL_7478634	2021-11-22	21J	AY.103	B.1.617.2.103	21J	Delta	21J (Delta)	25	good	44	13	0	0	274	0	33	4	0	92	89110	55	29836	0.986791	false	G210T,C241T,C3037T,G4181T,C6402T,C7124T,C8986T,G9053T,C10029T,A11201G,A11332G,C11572T,C14408T,C14925T,G15451A,C16466T,C17000T,A17236G,G17254T,T18304C,C18744T,C19220T,C21618G,T22917G,C22995A,G23401T,A23403G,C23604G,C24208T,G24410A,C25096T,C25469T,T26767C,C26858T,T27291C,T27638C,C27752T,C27874T,C28236T,A28461G,G28881T,G28916T,G29402T,G29742T	22029-22034,28248-28253,28271			M:I82T,N:D63G,N:R203M,N:G215C,N:D377Y,ORF1a:A1306S,ORF1a:P2046L,ORF1a:P2287S,ORF1a:V2930L,ORF1a:T3255I,ORF1a:T3646A,ORF1b:P314L,ORF1b:G662S,ORF1b:P1000L,ORF1b:T1178I,ORF1b:I1257V,ORF1b:V1263L,ORF1b:F1613L,ORF1b:A1918V,ORF3a:S26L,ORF7a:V82A,ORF7a:T120I,ORF7b:T40I,ORF8:R115C,ORF9b:T60A,S:T19R,S:R158G,S:L452R,S:T478K,S:Q613H,S:D614G,S:P681R,S:D950N	ORF8:D119-,ORF8:F120-,S:E156-,S:F157-			C18744T|21J,C26858T|21L&22C&23A&22A&22D&22F&rec&23B,T27291C|21J	C11572T,C14925T,C17000T,G17254T,T18304C,G23401T,C25096T,C28236T	0	3	8	11	21717-21990	S:52-143		3000	0	good	274	10	0
hCoV-19/USA/WI-MHDL-2021120191/2021|EPI_ISL_7478635|2021-11-22	hCoV-19/USA/WI-MHDL-2021120191/2021	EPI_ISL_7478635	2021-11-22	21J	AY.3	B.1.617.2.3	21J	Delta	21J (Delta)	6.25	good	44	13	0	0	274	0	34	4	0	92	88597	55	29665	0.981072	false	G210T,C241T,G1590A,A1876T,C3037T,G4181T,C6402T,C7124T,C8986T,G9053T,C10029T,A11201G,A11332G,A11456G,C12784T,C14408T,G15451A,C15928T,C16466T,C19118T,C19220T,C20844T,C21618G,T22917G,C22995A,A23403G,A23416G,C23604G,G24410A,C25469T,G25785T,T26767C,C27143T,T27638C,C27752T,C27874T,G28086T,A28461G,T28689C,G28881T,G28916T,G29050A,G29402T,C29509T	22029-22034,28248-28253,28271			M:I82T,N:D63G,N:L139S,N:R203M,N:G215C,N:D377Y,ORF1a:G442D,ORF1a:A1306S,ORF1a:P2046L,ORF1a:P2287S,ORF1a:V2930L,ORF1a:T3255I,ORF1a:T3646A,ORF1a:I3731V,ORF1b:P314L,ORF1b:G662S,ORF1b:P821S,ORF1b:P1000L,ORF1b:A1884V,ORF1b:A1918V,ORF3a:S26L,ORF3a:W131C,ORF7a:V82A,ORF7a:T120I,ORF7b:T40I,ORF8:A65S,ORF9b:T60A,S:T19R,S:R158G,S:L452R,S:T478K,S:D614G,S:P681R,S:D950N	ORF8:D119-,ORF8:F120-,S:E156-,S:F157-			G25785T|20I	G1590A,A1876T,C12784T,C15928T,C19118T,C20844T,A23416G,C27143T,G28086T,T28689C	0	1	10	11	21717-21990	S:52-143		3000	0	good	274	10	0
hCoV-19/USA/WI-MHDL-2021120192/2021|EPI_ISL_7478643|2021-11-22	hCoV-19/USA/WI-MHDL-2021120192/2021	EPI_ISL_7478643	2021-11-22	21J	AY.44	B.1.617.2.44	21J	Delta	21J (Delta)	2.29447	good	45	13	0	0	531	0	33	4	0	179	89106	55	29836	0.978196	false	G210T,C241T,C2857T,C3037T,G4181T,C4320T,C6040T,C6402T,C7124T,C7482T,C7735T,C8016T,C8986T,G9053T,C9365T,C10029T,A11201G,A11332G,T12436C,T14014G,C14408T,G15451A,C16466T,C19220T,C21618G,T22917G,C22995A,A23403G,C23604G,G24410A,C24904T,G25217T,G25290T,C25469T,T26767C,T27638C,C27752T,C27874T,A28461G,G28881T,G28916T,G29402T,G29554T,A29700G,G29742T	22029-22034,28248-28253,28271			M:I82T,N:D63G,N:R203M,N:G215C,N:D377Y,ORF1a:A1306S,ORF1a:A1352V,ORF1a:P2046L,ORF1a:P2287S,ORF1a:S2406L,ORF1a:A2584V,ORF1a:V2930L,ORF1a:T3255I,ORF1a:T3646A,ORF1b:F183V,ORF1b:P314L,ORF1b:G662S,ORF1b:P1000L,ORF1b:A1918V,ORF3a:S26L,ORF7a:V82A,ORF7a:T120I,ORF7b:T40I,ORF9b:T60A,S:T19R,S:R158G,S:L452R,S:T478K,S:D614G,S:P681R,S:D950N,S:G1219C,S:C1243F	ORF8:D119-,ORF8:F120-,S:E156-,S:F157-				C2857T,C4320T,C7482T,C7735T,C8016T,C9365T,T12436C,C24904T,G25217T,G25290T,G29554T	0	0	11	11	814,4403-4658,21717-21990	ORF1a:183,ORF1a:1380-1465,S:52-143		3000	8.55556	good	531	10	0
hCoV-19/USA/WI-MHDL-2021120236/2021|EPI_ISL_7828314|2021-11-22	hCoV-19/USA/WI-MHDL-2021120236/2021	EPI_ISL_7828314	2021-11-22	21J	AY.39	B.1.617.2.39	21J	Delta	21J (Delta)	8.50694	good	43	13	0	0	0	0	34	4	0	0	89210	40	29853	0.997024	false	G210T,C241T,T2931C,C3037T,A3559C,G4181T,C6402T,C7124T,G7756T,C8986T,G9053T,C9438T,C9979T,C10029T,A11201G,A11332G,T12037C,C12043T,C14408T,G15451A,C15654T,C16466T,C19220T,G20397A,G21372T,C21618G,C21846T,T22917G,C22995A,A23403G,C23604G,G24410A,C25469T,T26767C,G27604A,T27638C,C27752T,C27874T,A28461G,G28881T,G28916T,G29402T,G29742T	22029-22034,28248-28253,28271			M:I82T,N:D63G,N:R203M,N:G215C,N:D377Y,ORF1a:L889S,ORF1a:K1098N,ORF1a:A1306S,ORF1a:P2046L,ORF1a:P2287S,ORF1a:K2497N,ORF1a:V2930L,ORF1a:T3058I,ORF1a:T3255I,ORF1a:T3646A,ORF1b:P314L,ORF1b:G662S,ORF1b:P1000L,ORF1b:A1918V,ORF1b:Q2635H,ORF3a:S26L,ORF7a:V71I,ORF7a:V82A,ORF7a:T120I,ORF7b:T40I,ORF9b:T60A,S:T19R,S:T95I,S:R158G,S:L452R,S:T478K,S:D614G,S:P681R,S:D950N	ORF8:D119-,ORF8:F120-,S:E156-,S:F157-		A21987G		T2931C,A3559C,G7756T,C9438T,C9979T,T12037C,C12043T,C15654T,G20397A	1	0	9	10				3000	0	good	0	10	0
hCoV-19/USA/WI-MHDL-2021120246/2021|EPI_ISL_7828322|2021-11-22	hCoV-19/USA/WI-MHDL-2021120246/2021	EPI_ISL_7828322	2021-11-22	21J	AY.39	B.1.617.2.39	21J	Delta	21J (Delta)	3.34306	good	39	13	0	0	503	0	31	4	0	170	89220	42	29853	0.980136	false	G210T,C241T,C337T,C3037T,G3304T,G3433T,G3692T,G4181T,C6402T,C7124T,C8986T,G9053T,C10029T,A11201G,A11332G,C11572T,C14408T,G15451A,C16466T,A16644G,C19220T,G21372T,C21618G,T22917G,C22995A,A23403G,C23604G,G24410A,C25469T,T26767C,G27604A,T27638C,C27752T,C27874T,A28461G,G28881T,G28916T,G29402T,G29742T	22029-22034,28248-28253,28271			M:I82T,N:D63G,N:R203M,N:G215C,N:D377Y,ORF1a:E1013D,ORF1a:V1143F,ORF1a:A1306S,ORF1a:P2046L,ORF1a:P2287S,ORF1a:V2930L,ORF1a:T3255I,ORF1a:T3646A,ORF1b:P314L,ORF1b:G662S,ORF1b:P1000L,ORF1b:A1918V,ORF1b:Q2635H,ORF3a:S26L,ORF7a:V71I,ORF7a:V82A,ORF7a:T120I,ORF7b:T40I,ORF9b:T60A,S:T19R,S:R158G,S:L452R,S:T478K,S:D614G,S:P681R,S:D950N	ORF8:D119-,ORF8:F120-,S:E156-,S:F157-		A21987G		C337T,G3304T,G3433T,G3692T,C11572T,A16644G	1	0	6	7	19291-19558,21733-21831,21843-21978	ORF1b:1942-2031,S:57-90,S:94-139		3000	7.51852	good	503	10	0
hCoV-19/USA/WI-MHDL-2021120247/2021|EPI_ISL_7828323|2021-11-22	hCoV-19/USA/WI-MHDL-2021120247/2021	EPI_ISL_7828323	2021-11-22	21J	AY.103	B.1.617.2.103	21J	Delta	21J (Delta)	14.0625	good	38	13	0	0	70	0	31	4	0	24	89242	40	29857	0.994817	false	G210T,C241T,C1191T,C3037T,G4181T,C6402T,T6661C,C7124T,C8986T,G9053T,C10029T,A11201G,A11332G,C14408T,G15451A,C16466T,A17236G,C19220T,C21618G,C21707T,T22917G,C22995A,A23403G,C23604G,C24208T,G24410A,C25469T,T26767C,T27291C,T27638C,C27752T,C27874T,G27967A,A28461G,G28881T,G28916T,G29402T,G29742T	22029-22034,28248-28253,28271			M:I82T,N:D63G,N:R203M,N:G215C,N:D377Y,ORF1a:P309L,ORF1a:A1306S,ORF1a:P2046L,ORF1a:P2287S,ORF1a:V2930L,ORF1a:T3255I,ORF1a:T3646A,ORF1b:P314L,ORF1b:G662S,ORF1b:P1000L,ORF1b:I1257V,ORF1b:A1918V,ORF3a:S26L,ORF7a:V82A,ORF7a:T120I,ORF7b:T40I,ORF8:C25Y,ORF9b:T60A,S:T19R,S:H49Y,S:R158G,S:L452R,S:T478K,S:D614G,S:P681R,S:D950N	ORF8:D119-,ORF8:F120-,S:E156-,S:F157-		A21987G	C1191T|21A,T27291C|21J	T6661C,C21707T,G27967A	1	2	3	6	19293-19350,19537-19548	ORF1b:1942-1961,ORF1b:2024-2027		3000	0	good	70	10	0
hCoV-19/USA/WI-MHDL-2021120252/2021|EPI_ISL_7828328|2021-11-22	hCoV-19/USA/WI-MHDL-2021120252/2021	EPI_ISL_7828328	2021-11-22	21J	AY.103	B.1.617.2.103	21J	Delta	21J (Delta)	21.0069	good	43	13	0	0	27	0	32	4	0	13	89222	40	29857	0.996255	false	G210T,C241T,T2827C,C3037T,G4105T,G4181T,T6096C,C6402T,C7124T,C8986T,G9053T,C10029T,A11201G,A11332G,C11572T,C12624A,C14408T,G15451A,C16466T,A17236G,C19154T,C19220T,T21087C,C21618G,T22917G,C22995A,A23403G,C23604G,C24208T,G24410A,C25469T,T26767C,T27291C,T27638C,C27752T,C27874T,A28461G,G28881T,G28916T,G29402T,C29686T,G29742T,C29743T	22029-22034,28248-28253,28271			M:I82T,N:D63G,N:R203M,N:G215C,N:D377Y,ORF1a:K1280N,ORF1a:A1306S,ORF1a:L1944S,ORF1a:P2046L,ORF1a:P2287S,ORF1a:V2930L,ORF1a:T3255I,ORF1a:T3646A,ORF1a:P4120H,ORF1b:P314L,ORF1b:G662S,ORF1b:P1000L,ORF1b:I1257V,ORF1b:T1896I,ORF1b:A1918V,ORF3a:S26L,ORF7a:V82A,ORF7a:T120I,ORF7b:T40I,ORF9b:T60A,S:T19R,S:R158G,S:L452R,S:T478K,S:D614G,S:P681R,S:D950N	ORF8:D119-,ORF8:F120-,S:E156-,S:F157-		A21987G	T27291C|21J	T2827C,G4105T,T6096C,C11572T,C12624A,C19154T,T21087C,C29686T,C29743T	1	1	9	11	19298-19316,21904-21905,21939-21941,21966-21968	ORF1b:1944-1950,S:114-115,S:126-127,S:135-136		3000	0	good	27	10	0
hCoV-19/USA/WI-MHDL-2021120253/2021|EPI_ISL_7828329|2021-11-22	hCoV-19/USA/WI-MHDL-2021120253/2021	EPI_ISL_7828329	2021-11-22	21J	AY.44	B.1.617.2.44	21J	Delta	21J (Delta)	126.562	bad	47	19	0	0	0	0	33	6	0	0	89177	39	29855	0.997124	false	G210T,C241T,C3037T,C3241T,G4181T,C5497T,C6040T,C6402T,C6638T,C7124T,C7926T,C8986T,G9053T,C10029T,A11201G,A11332G,G12079A,C12100A,T14014G,C14408T,G15451A,C16466T,C16726T,T18144C,C19185T,C19220T,C21618G,T22917G,C22995A,A23403G,C23604G,G24410A,C24865T,C25469T,T26767C,G27561T,T27638C,C27752T,C27874T,G28073T,A28461G,C28507T,G28881T,G28916T,G29402T,A29700G,G29742T	21765-21770,22029-22034,28248-28253,28271			M:I82T,N:D63G,N:R203M,N:G215C,N:D377Y,ORF1a:A1306S,ORF1a:P2046L,ORF1a:H2125Y,ORF1a:P2287S,ORF1a:A2554V,ORF1a:V2930L,ORF1a:T3255I,ORF1a:T3646A,ORF1b:F183V,ORF1b:P314L,ORF1b:G662S,ORF1b:P1000L,ORF1b:H1087Y,ORF1b:A1918V,ORF3a:S26L,ORF7a:V82A,ORF7a:T120I,ORF7b:T40I,ORF8:L60F,ORF9b:T60A,ORF9b:A75V,S:T19R,S:R158G,S:L452R,S:T478K,S:D614G,S:P681R,S:D950N	ORF8:D119-,ORF8:F120-,S:H69-,S:V70-,S:E156-,S:F157-		A21987G	C3241T|21K,C6638T|21J,C7926T|21J&21K,C16726T|21J,G28073T|21J	C5497T,G12079A,C12100A,T18144C,C19185T,C24865T,G27561T,C28507T	1	5	8	14				3000	0	good	0	10	0
hCoV-19/USA/WI-MHDL-2021120254/2021|EPI_ISL_7828330|2021-11-22	hCoV-19/USA/WI-MHDL-2021120254/2021	EPI_ISL_7828330	2021-11-22	21I	AY.37	B.1.617.2.37	21I	Delta	21I (Delta)	25.527	good	37	13	0	0	496	0	29	4	0	166	89240	40	29855	0.980504	false	G210T,C241T,G2185T,C2509T,C3037T,C5184T,A5584G,A5780G,G9756A,C9891T,T11418C,C11514T,C13019T,C14408T,G15451A,C16466T,C18167T,C20233T,T20911C,C21618G,C22227T,G22661C,T22981C,C22995A,A23403G,C23604G,G24410A,C25469T,T26767C,T27638C,C27752T,A28461G,C28638T,G28881T,G29402T,C29541T,G29742T	22029-22034,28248-28253,28271			M:I82T,N:D63G,N:P122L,N:R203M,N:D377Y,ORF1a:E640D,ORF1a:P1640L,ORF1a:I1839V,ORF1a:R3164H,ORF1a:A3209V,ORF1a:V3718A,ORF1a:T3750I,ORF1b:P314L,ORF1b:G662S,ORF1b:P1000L,ORF1b:P1567L,ORF1b:P2256S,ORF3a:S26L,ORF7a:V82A,ORF7a:T120I,ORF9b:T60A,S:T19R,S:R158G,S:A222V,S:V367L,S:T478K,S:D614G,S:P681R,S:D950N	ORF8:D119-,ORF8:F120-,S:E156-,S:F157-		A21987G,G22917T		A5780G,G9756A,C18167T,C20233T,G22661C,T22981C,C28638T,C29541T	2	0	8	10	2585-2832,19933-20180	ORF1a:774-856,ORF1b:2156-2238		3000	7.25926	good	496	10	0
hCoV-19/USA/WI-MHDL-2021120255/2021|EPI_ISL_7828331|2021-11-22	hCoV-19/USA/WI-MHDL-2021120255/2021	EPI_ISL_7828331	2021-11-22	21J	AY.103	B.1.617.2.103	21J	Delta	21J (Delta)	92.9256	mediocre	35	7	0	0	2893	0	26	2	0	980	89229	51	29851	0.899843	false	G210T,C241T,C3037T,G4105T,G4181T,T6096C,C6402T,C8986T,G9053T,C10029T,A11201G,A11332G,C11572T,C12624A,C14408T,G15451A,C16466T,A17236G,C19154T,C19220T,T21087C,C21618G,A23403G,C23604G,C24208T,G24410A,C25469T,T26767C,T27291C,C27874T,A28461G,G28881T,G28916T,G29402T,G29742T	28248-28253,28271			M:I82T,N:D63G,N:R203M,N:G215C,N:D377Y,ORF1a:K1280N,ORF1a:A1306S,ORF1a:L1944S,ORF1a:P2046L,ORF1a:V2930L,ORF1a:T3255I,ORF1a:T3646A,ORF1a:P4120H,ORF1b:P314L,ORF1b:G662S,ORF1b:P1000L,ORF1b:I1257V,ORF1b:T1896I,ORF1b:A1918V,ORF3a:S26L,ORF7b:T40I,ORF9b:T60A,S:T19R,S:D614G,S:P681R,S:D950N	ORF8:D119-,ORF8:F120-			T27291C|21J	G4105T,T6096C,C11572T,C12624A,C19154T,T21087C	0	1	6	7	77-101,1943-1945,1955-1965,2063-2198,2581-2806,2810-2817,2823-2832,3532-3538,3541-3542,7112-7222,8636-8896,11846-11869,13380-13611,19299-19548,20078-20200,20751-20792,21161-21366,21733-21990,21992-22036,22046-22061,22237-22256,22263-22271,22281-22293,22303-22318,22334-22342,22897-23129,23836-23845,23997-24019,24069,24076-24077,25668,25956-25966,25970-26208,26215-26219,26351-26364,27116-27141,2752…	E:36-40,M:198-207,ORF1a:560,ORF1a:564-567,ORF1a:600-645,ORF1a:772-847,ORF1a:849-851,ORF1a:853-856,ORF1a:1089-1093,ORF1a:2283-2319,ORF1a:2791-2877,ORF1a:3861-3868,ORF1a:4372-4401,ORF1b:1-48,ORF1b:1944-2027,ORF1b:2204-2245,ORF1b:2428-2442,ORF1b:2565-2633,ORF3a:92,ORF3a:188-272,ORF3a:275-276,ORF7a:45-122,ORF7b:1-12,S:57-158,S:162-167,S:225-232,S:234-237,S:240-244,S:247-252,S:258-260,S:445-523,S:758-…		3000	96.037	mediocre	2893	10	0
hCoV-19/USA/WI-MHDL-2021120256/2021|EPI_ISL_7828332|2021-11-22	hCoV-19/USA/WI-MHDL-2021120256/2021	EPI_ISL_7828332	2021-11-22	21J	AY.103	B.1.617.2.103	21J	Delta	21J (Delta)	4.34028	good	40	13	0	0	16	0	31	4	0	6	89240	39	29858	0.996689	false	G210T,C241T,C2644T,C3037T,G4181T,C6402T,C7124T,G8349A,C8956T,C8986T,G9053T,C10029T,A11201G,A11332G,C14408T,G15451A,C16466T,A17236G,C18657T,C19220T,C21618G,T22917G,C22995A,A23403G,C23481T,C23604G,C24208T,G24410A,C25469T,T26767C,C27005T,T27638C,C27752T,C27874T,C27999T,A28461G,G28881T,G28916T,G29402T,G29742T	22029-22034,28248-28253,28271			M:I82T,N:D63G,N:R203M,N:G215C,N:D377Y,ORF1a:A1306S,ORF1a:P2046L,ORF1a:P2287S,ORF1a:S2695N,ORF1a:V2930L,ORF1a:T3255I,ORF1a:T3646A,ORF1b:P314L,ORF1b:G662S,ORF1b:P1000L,ORF1b:I1257V,ORF1b:A1918V,ORF3a:S26L,ORF7a:V82A,ORF7a:T120I,ORF7b:T40I,ORF8:P36S,ORF9b:T60A,S:T19R,S:R158G,S:L452R,S:T478K,S:D614G,S:S640F,S:P681R,S:D950N	ORF8:D119-,ORF8:F120-,S:E156-,S:F157-		A21987G		C2644T,G8349A,C8956T,C18657T,C23481T,C27005T,C27999T	1	0	7	8	19298-19313	ORF1b:1944-1949		3000	0	good	16	10	0
hCoV-19/USA/WI-MHDL-2021120257/2021|EPI_ISL_7828333|2021-11-22	hCoV-19/USA/WI-MHDL-2021120257/2021	EPI_ISL_7828333	2021-11-22	21J	AY.103	B.1.617.2.103	21J	Delta	21J (Delta)	21.0069	good	43	13	0	0	144	0	33	4	0	50	89228	39	29858	0.992409	false	G210T,C241T,G1922A,T2827C,C3037T,G4105T,G4181T,T6096C,C6402T,C7124T,C8986T,G9053T,C10029T,A11201G,A11332G,C11572T,C12624A,C14408T,G15451A,C16466T,A17236G,C19154T,C19220T,T21087C,C21618G,T22917G,C22995A,A23403G,C23604G,C24208T,G24410A,C25469T,T26767C,T27291C,T27638C,C27752T,C27874T,A28461G,G28881T,G28916T,G29402T,G29742T,C29743T	22029-22034,28248-28253,28271			M:I82T,N:D63G,N:R203M,N:G215C,N:D377Y,ORF1a:E553K,ORF1a:K1280N,ORF1a:A1306S,ORF1a:L1944S,ORF1a:P2046L,ORF1a:P2287S,ORF1a:V2930L,ORF1a:T3255I,ORF1a:T3646A,ORF1a:P4120H,ORF1b:P314L,ORF1b:G662S,ORF1b:P1000L,ORF1b:I1257V,ORF1b:T1896I,ORF1b:A1918V,ORF3a:S26L,ORF7a:V82A,ORF7a:T120I,ORF7b:T40I,ORF9b:T60A,S:T19R,S:R158G,S:L452R,S:T478K,S:D614G,S:P681R,S:D950N	ORF8:D119-,ORF8:F120-,S:E156-,S:F157-		A21987G	T27291C|21J	G1922A,T2827C,G4105T,T6096C,C11572T,C12624A,C19154T,T21087C,C29743T	1	1	9	11	19524-19553,19555-19557,21737-21787,21912-21971	ORF1b:2019-2030,S:59-75,S:117-137		3000	0	good	144	10	0
hCoV-19/USA/WI-MHDL-2021120259/2021|EPI_ISL_7829645|2021-11-22	hCoV-19/USA/WI-MHDL-2021120259/2021	EPI_ISL_7829645	2021-11-22	21J	AY.44	B.1.617.2.44	21J	Delta	21J (Delta)	73.6111	mediocre	45	32	0	1	50	0	33	11	0	69	89173	31	29856	0.995753	false	G210T,C241T,A382G,C2040T,C3037T,T3544C,G4181T,A4870G,C6040T,C6402T,C7124T,C8986T,G9053T,C10029T,C10833T,A11201G,A11332G,A13453G,T14014G,C14408T,G15451A,C16466T,C19220T,C20951T,C21618G,T22917G,C22995A,A23403G,C23604G,C23625T,G24410A,C25469T,T26767C,T27638C,C27752T,C27874T,G28109T,A28461G,G28551T,G28881T,G28916T,G29402T,G29554T,A29700G,G29742T	22029-22034,27588-27606,28248-28253,28271		ORF7a:72-122	M:I82T,N:D63G,N:R93L,N:R203M,N:G215C,N:D377Y,ORF1a:T592I,ORF1a:A1306S,ORF1a:P2046L,ORF1a:P2287S,ORF1a:V2930L,ORF1a:T3255I,ORF1a:A3523V,ORF1a:T3646A,ORF1b:F183V,ORF1b:P314L,ORF1b:G662S,ORF1b:P1000L,ORF1b:A1918V,ORF1b:S2495L,ORF3a:S26L,ORF7b:T40I,ORF8:Q72H,ORF9b:T60A,ORF9b:E90*,S:T19R,S:R158G,S:L452R,S:T478K,S:D614G,S:P681R,S:A688V,S:D950N	ORF7a:F65-,ORF7a:A66-,ORF7a:C67-,ORF7a:P68-,ORF7a:D69-,ORF7a:G70-,ORF7a:V71-,ORF8:D119-,ORF8:F120-,S:E156-,S:F157-		A21987G		A382G,C2040T,T3544C,A4870G,C10833T,A13453G,C20951T,C23625T,G28109T,G28551T,G29554T	1	0	11	12	21919-21968	ORF7a:72-122,S:119-136		3000	0	good	50	10	0
hCoV-19/USA/WI-MHDL-2021120261/2021|EPI_ISL_7828334|2021-11-22	hCoV-19/USA/WI-MHDL-2021120261/2021	EPI_ISL_7828334	2021-11-22	21J	AY.103	B.1.617.2.103	21J	Delta	21J (Delta)	44.4444	mediocre	34	13	0	0	268	0	27	4	0	91	89249	40	29854	0.988095	false	G210T,C241T,C3037T,G4181T,C6402T,G6421T,C7124T,C8986T,G9053T,C10029T,A11201G,A11332G,C14408T,G15451A,C16466T,A17236G,C19220T,C21618G,A23403G,C23430T,C23604G,C24208T,G24410A,C25469T,T26767C,T27291C,T27638C,C27752T,C27874T,A28461G,G28881T,G28916T,G29402T,G29742T	22029-22034,28248-28253,28271			M:I82T,N:D63G,N:R203M,N:G215C,N:D377Y,ORF1a:A1306S,ORF1a:P2046L,ORF1a:P2287S,ORF1a:V2930L,ORF1a:T3255I,ORF1a:T3646A,ORF1b:P314L,ORF1b:G662S,ORF1b:P1000L,ORF1b:I1257V,ORF1b:A1918V,ORF3a:S26L,ORF7a:V82A,ORF7a:T120I,ORF7b:T40I,ORF9b:T60A,S:T19R,S:R158G,S:D614G,S:A623V,S:P681R,S:D950N	ORF8:D119-,ORF8:F120-,S:E156-,S:F157-		A21987G,G22917T,A22995C	T27291C|21J	G6421T,C23430T	3	1	2	6	19291,19293-19557,22897-22898	ORF1b:1942-2030,S:445-446		3000	0	good	268	10	0
hCoV-19/USA/WI-MHDL-2021120262/2021|EPI_ISL_7828335|2021-11-22	hCoV-19/USA/WI-MHDL-2021120262/2021	EPI_ISL_7828335	2021-11-22	21J	AY.103	B.1.617.2.103	21J	Delta	21J (Delta)	25.2854	good	34	7	0	0	1478	0	24	2	0	503	89221	55	29851	0.947029	false	G210T,C241T,T2088C,C3037T,G4181T,G4960C,C6402T,G6421T,C7124T,C8986T,G9053T,C10029T,A11201G,A11332G,C14408T,G15451A,A15777C,C16466T,A17236G,C19220T,C21618G,A23403G,C23604G,C24208T,G24410A,C25469T,T26767C,T27291C,C27874T,A28461G,G28881T,G28916T,G29402T,G29742T	28248-28253,28271			M:I82T,N:D63G,N:R203M,N:G215C,N:D377Y,ORF1a:L608S,ORF1a:A1306S,ORF1a:P2046L,ORF1a:P2287S,ORF1a:V2930L,ORF1a:T3255I,ORF1a:T3646A,ORF1b:P314L,ORF1b:G662S,ORF1b:P1000L,ORF1b:I1257V,ORF1b:A1918V,ORF3a:S26L,ORF7b:T40I,ORF9b:T60A,S:T19R,S:D614G,S:P681R,S:D950N	ORF8:D119-,ORF8:F120-		A21987G	T27291C|21J	T2088C,G4960C,G6421T,A15777C	1	1	4	6	5008-5030,5033-5089,5184-5199,5203-5229,5260-5275,8651-8896,13381-13616,19297-19558,21733-21753,22014-22071,22896-23129,25970-25980,25990-25995,27527-27791	ORF1a:1581-1608,ORF1a:1640-1655,ORF1a:1665-1670,ORF1a:2796-2877,ORF1a:4372-4401,ORF1b:1-50,ORF1b:1944-2031,ORF3a:193-196,ORF3a:200-201,ORF7a:45-122,ORF7b:1-12,S:57-64,S:151-170,S:445-523		3000	43.6296	mediocre	1478	10	0
hCoV-19/USA/WI-MHDL-2021120264/2021|EPI_ISL_7828336|2021-11-22	hCoV-19/USA/WI-MHDL-2021120264/2021	EPI_ISL_7828336	2021-11-22	21I	AY.37	B.1.617.2.37	21I	Delta	21I (Delta)	4.34028	good	37	13	0	0	247	0	29	4	0	83	89231	41	29853	0.98873	false	G210T,C241T,G2185T,C2509T,C3037T,C5184T,A5584G,G9756A,C9891T,T11418C,C11514T,C13019T,C14408T,G15451A,C16466T,C18167T,C20233T,T20911C,C21618G,C22227T,G22661C,T22917G,T22981C,C22995A,A23403G,C23604G,G24410A,C25469T,T26767C,T27638C,C27752T,A28461G,C28638T,G28881T,G29402T,C29541T,G29742T	22029-22034,28248-28253,28271			M:I82T,N:D63G,N:P122L,N:R203M,N:D377Y,ORF1a:E640D,ORF1a:P1640L,ORF1a:R3164H,ORF1a:A3209V,ORF1a:V3718A,ORF1a:T3750I,ORF1b:P314L,ORF1b:G662S,ORF1b:P1000L,ORF1b:P1567L,ORF1b:P2256S,ORF3a:S26L,ORF7a:V82A,ORF7a:T120I,ORF9b:T60A,S:T19R,S:R158G,S:A222V,S:V367L,S:L452R,S:T478K,S:D614G,S:P681R,S:D950N	ORF8:D119-,ORF8:F120-,S:E156-,S:F157-		A21987G		G9756A,C18167T,C20233T,G22661C,T22981C,C28638T,C29541T	1	0	7	8	19935-20181	ORF1b:2156-2238		3000	0	good	247	10	0
hCoV-19/USA/WI-UW-6533/2021|EPI_ISL_7452677|2021-11-22	hCoV-19/USA/WI-UW-6533/2021	EPI_ISL_7452677	2021-11-22	21J	AY.103	B.1.617.2.103	21J	Delta	21J (Delta)	82.6484	mediocre	38	7	0	0	2713	0	30	2	0	910	88956	55	29768	0.902953	false	G210T,C241T,G2155T,C3037T,G4181T,C6402T,C7124T,C8986T,G9053T,A11201G,A11332G,C11572T,C14408T,G15451A,C16466T,A17236G,C19220T,C21618G,T22917G,C22995A,A23403G,C23604G,C24208T,G24410A,C25469T,T26767C,T27291C,C27527T,T27638C,C27752T,C27874T,C28236A,G28378T,A28461G,G28881T,G28916T,G29402T,G29742T	28248-28253,28271			M:I82T,N:D63G,N:R203M,N:G215C,N:D377Y,ORF1a:W630C,ORF1a:A1306S,ORF1a:P2046L,ORF1a:P2287S,ORF1a:V2930L,ORF1a:T3646A,ORF1b:P314L,ORF1b:G662S,ORF1b:P1000L,ORF1b:I1257V,ORF1b:A1918V,ORF3a:S26L,ORF7a:P45L,ORF7a:V82A,ORF7a:T120I,ORF7b:T40I,ORF8:R115S,ORF9b:R32L,ORF9b:T60A,S:T19R,S:L452R,S:T478K,S:D614G,S:P681R,S:D950N	ORF8:D119-,ORF8:F120-			T27291C|21J,C27527T|21J	G2155T,C11572T,C28236A,G28378T	0	2	4	6	2235-2236,2245-2698,5305,9379-10068,11074-11075,15714-16360,21621-22537	ORF1a:657,ORF1a:660-811,ORF1a:1680,ORF1a:3038-3268,ORF1a:3603-3604,ORF1b:749-965,S:20-325		3000	89.3704	mediocre	2713	10	0
hCoV-19/USA/WI-UW-6534/2021|EPI_ISL_7452678|2021-11-22	hCoV-19/USA/WI-UW-6534/2021	EPI_ISL_7452678	2021-11-22	21J	AY.103	B.1.617.2.103	21J	Delta	21J (Delta)	18.9844	good	43	13	0	0	644	0	34	4	0	220	88910	55	29768	0.972143	false	G210T,C241T,G2155T,C3037T,G4181T,C6402T,C7124T,C8986T,G9053T,C10029T,A11201G,A11332G,C11572T,C14408T,G15451A,T15939C,C16466T,T17043C,A17236G,C19220T,C21618G,G21987A,T22917G,C22995A,A23403G,C23604G,C24208T,G24386T,G24410A,C25469T,T26767C,T27291C,C27527T,T27638C,C27752T,C27874T,C28236A,G28378T,A28461G,G28881T,G28916T,G29402T,G29742T	22029-22034,28248-28253,28271			M:I82T,N:D63G,N:R203M,N:G215C,N:D377Y,ORF1a:W630C,ORF1a:A1306S,ORF1a:P2046L,ORF1a:P2287S,ORF1a:V2930L,ORF1a:T3255I,ORF1a:T3646A,ORF1b:P314L,ORF1b:G662S,ORF1b:P1000L,ORF1b:I1257V,ORF1b:A1918V,ORF3a:S26L,ORF7a:P45L,ORF7a:V82A,ORF7a:T120I,ORF7b:T40I,ORF8:R115S,ORF9b:R32L,ORF9b:T60A,S:T19R,S:G142D,S:R158G,S:L452R,S:T478K,S:D614G,S:P681R,S:A942S,S:D950N	ORF8:D119-,ORF8:F120-,S:E156-,S:F157-			T15939C|23A&22F&23B,T27291C|21J,C27527T|21J	G2155T,C11572T,T17043C,G24386T,C28236A,G28378T	0	3	6	9	2245-2603,9379-9570,9682-9732,11074-11075,22277-22313,22523-22525	ORF1a:660-780,ORF1a:3038-3102,ORF1a:3139-3156,ORF1a:3603-3604,S:239-251,S:321		3000	12.7407	good	644	10	0
hCoV-19/USA/WI-UW-6556/2021|EPI_ISL_7452708|2021-11-22	hCoV-19/USA/WI-UW-6556/2021	EPI_ISL_7452708	2021-11-22	21J	AY.103	B.1.617.2.103	21J	Delta	21J (Delta)	57.4281	mediocre	38	10	0	0	2343	0	30	3	0	788	88937	56	29768	0.915293	false	G210T,C241T,C3037T,G3939T,G4181T,C6402T,C7124T,C8986T,G9053T,C10029T,A11201G,A11332G,C11572T,C13994T,C14408T,G15451A,C16466T,A17236G,C19220T,G19891T,C21618G,T22917G,C22995A,A23403G,C23604G,C24208T,G24410A,C25469T,T26767C,T27291C,T27638C,C27752T,C27874T,A28461G,G28881T,G28916T,G29402T,G29742T	5303-5305,28248-28253,28271			M:I82T,N:D63G,N:R203M,N:G215C,N:D377Y,ORF1a:R1225I,ORF1a:A1306S,ORF1a:P2046L,ORF1a:P2287S,ORF1a:V2930L,ORF1a:T3255I,ORF1a:T3646A,ORF1b:A176V,ORF1b:P314L,ORF1b:G662S,ORF1b:P1000L,ORF1b:I1257V,ORF1b:A1918V,ORF1b:D2142Y,ORF3a:S26L,ORF7a:V82A,ORF7a:T120I,ORF7b:T40I,ORF9b:T60A,S:T19R,S:L452R,S:T478K,S:D614G,S:P681R,S:D950N	ORF1a:L1680-,ORF8:D119-,ORF8:F120-			T27291C|21J	G3939T,C11572T,C13994T,G19891T	0	1	4	5	2245-2793,2846-2903,4241-4874,4936-5051,5081-5149,11074-11075,21621,21625-22537,27170	M:216,ORF1a:660-843,ORF1a:861-880,ORF1a:1326-1537,ORF1a:1557-1596,ORF1a:1606-1628,ORF1a:3603-3604,S:20-325		3000	75.6667	mediocre	2343	10	0
hCoV-19/USA/WI-WSLH-221617/2021|EPI_ISL_7263719|2021-11-22	hCoV-19/USA/WI-WSLH-221617/2021	EPI_ISL_7263719	2021-11-22	21J	AY.100	B.1.617.2.100	21J	Delta	21J (Delta)	2.06818	good	43	13	0	0	492	0	32	4	0	165	89114	55	29836	0.9795	false	G210T,C241T,A532T,C2508T,C3037T,G4181T,C5812T,C6402T,C7124T,C8986T,G9053T,C9133A,C9559T,C10029T,A11201G,A11332G,C13329T,C14408T,C15240T,G15451A,C16466T,G17122T,G17427T,C19220T,C21618G,T22917G,C22995A,A23403G,C23604G,G24410A,C25469T,T26767C,T27638C,C27752T,C27874T,A27985T,T28007C,C28432T,A28461G,G28881T,G28916T,G29402T,G29742T	22029-22034,28248-28253,28271			M:I82T,N:D63G,N:R203M,N:G215C,N:D377Y,ORF1a:P748L,ORF1a:A1306S,ORF1a:P2046L,ORF1a:P2287S,ORF1a:V2930L,ORF1a:T3255I,ORF1a:T3646A,ORF1a:T4355I,ORF1b:P314L,ORF1b:G662S,ORF1b:P1000L,ORF1b:A1219S,ORF1b:A1918V,ORF3a:S26L,ORF7a:V82A,ORF7a:T120I,ORF7b:T40I,ORF8:Y31F,ORF9b:S50L,ORF9b:T60A,S:T19R,S:R158G,S:L452R,S:T478K,S:D614G,S:P681R,S:D950N	ORF8:D119-,ORF8:F120-,S:E156-,S:F157-			C28432T|21J	A532T,C2508T,C5812T,C9133A,C13329T,G17427T,A27985T	0	1	7	8	21717-21990,22325-22542	S:52-143,S:255-327		3000	7.11111	good	492	10	0
hCoV-19/USA/WI-WSLH-221831/2021|EPI_ISL_7951254|2021-11-22	hCoV-19/USA/WI-WSLH-221831/2021	EPI_ISL_7951254	2021-11-22	21J	AY.25.1	B.1.617.2.25.1	21J	Delta	21J (Delta)	4.08938	good	39	7	0	0	846	0	31	2	0	285	89156	55	29836	0.967662	false	G210T,C241T,C815A,G2564A,C3037T,A3948G,G4181T,T4579C,C6402T,C7124T,C8986T,G9053T,C10029T,A11201G,A11332G,G11562T,C14408T,G15451A,C16466T,G19101T,C19220T,C21618G,A23403G,C23604G,G24410A,C25469T,G26107C,G26720T,T26767C,T27233C,A27507C,T27638C,C27752T,C27874T,A28461G,G28881T,G28916T,G29402T,G29742T	28248-28253,28271			M:I82T,N:D63G,N:R203M,N:G215C,N:D377Y,ORF1a:R184S,ORF1a:E767K,ORF1a:D1228G,ORF1a:A1306S,ORF1a:P2046L,ORF1a:P2287S,ORF1a:V2930L,ORF1a:T3255I,ORF1a:T3646A,ORF1a:C3766F,ORF1b:P314L,ORF1b:G662S,ORF1b:P1000L,ORF1b:Q1878H,ORF1b:A1918V,ORF3a:S26L,ORF3a:E239Q,ORF6:I11T,ORF7a:V82A,ORF7a:T120I,ORF7b:T40I,ORF9b:T60A,S:T19R,S:D614G,S:P681R,S:D950N	ORF8:D119-,ORF8:F120-				C815A,G2564A,T4579C,G19101T,G26720T,T27233C	0	0	6	6	21717-22034,22282-22542,22878-23144	S:52-158,S:240-327,S:439-528		3000	20.2222	good	846	10	0
hCoV-19/USA/WI-WSLH-221832/2021|EPI_ISL_7951255|2021-11-22	hCoV-19/USA/WI-WSLH-221832/2021	EPI_ISL_7951255	2021-11-22	21J	AY.3.1	B.1.617.2.3.1	21J	Delta	21J (Delta)	10.6722	good	46	57	0	1	1109	1	34	19	0	420	88963	55	29836	0.958834	false	G210T,C241T,C504T,A1630C,C3037T,G3644T,C3990T,G4181T,C5497T,C6402T,C6840T,C7124T,C8986T,G9053T,C10029T,A11201G,A11332G,A11456G,C11663T,C14408T,C14708T,G15451A,C16466T,C18115T,C19220T,C20199T,C21618G,T23284C,A23403G,C23604G,G24410A,G25166A,C25339T,C25469T,G25912T,T26767C,T27638C,C27752T,C27874T,A28461G,G28881T,G28916T,G29050A,G29402T,C29509T,G29742T	22029-22034,27580-27623,28248-28253,28271		ORF7a:78-122	M:I82T,N:D63G,N:R203M,N:G215C,N:D377Y,ORF1a:P80L,ORF1a:Q455H,ORF1a:D1127Y,ORF1a:T1242I,ORF1a:A1306S,ORF1a:P2046L,ORF1a:A2192V,ORF1a:P2287S,ORF1a:V2930L,ORF1a:T3255I,ORF1a:T3646A,ORF1a:I3731V,ORF1a:L3800F,ORF1b:P314L,ORF1b:A414V,ORF1b:G662S,ORF1b:P1000L,ORF1b:H1550Y,ORF1b:A1918V,ORF3a:S26L,ORF3a:G174C,ORF7b:T40I,ORF9b:T60A,S:T19R,S:R158G,S:D614G,S:P681R,S:D950N,S:E1202K	ORF7a:F63-,ORF7a:A64-,ORF7a:F65-,ORF7a:A66-,ORF7a:C67-,ORF7a:P68-,ORF7a:D69-,ORF7a:G70-,ORF7a:V71-,ORF7a:K72-,ORF7a:H73-,ORF7a:V74-,ORF7a:Y75-,ORF7a:Q76-,ORF7a:L77-,ORF8:D119-,ORF8:F120-,S:E156-,S:F157-				C504T,A1630C,C3990T,C5497T,C6840T,C11663T,C14708T,G25166A,G25912T	0	0	9	9	1313-1328,1576-1595,20232-20496,21717-22008,22319-22542,22878-23144,28983-29007	N:237-245,ORF1a:350-355,ORF1a:437-444,ORF1b:2255-2343,ORF7a:78-122,S:52-149,S:253-327,S:439-528	R:29700	3000	29.963	good	1109	10	10
hCoV-19/USA/WI-WSLH-222241/2021|EPI_ISL_8163540|2021-11-22	hCoV-19/USA/WI-WSLH-222241/2021	EPI_ISL_8163540	2021-11-22	21J	AY.103	B.1.617.2.103	21J	Delta	21J (Delta)	10.1032	good	39	7	0	0	830	0	29	2	0	279	89156	55	29836	0.968197	false	G210T,C241T,T2827C,C3037T,G4181T,C6402T,C7124T,C8895T,C8986T,G9053T,C9611T,C10029T,A11201G,A11332G,C11572T,C12624A,C14408T,G15451A,C16466T,A17236G,C18795T,C19220T,C21618G,A23403G,C23604G,C24208T,G24410A,C25469T,C25624T,T26767C,T27291C,T27638C,C27752T,C27874T,A28461G,G28881T,G28916T,G29402T,G29742T	28248-28253,28271			M:I82T,N:D63G,N:R203M,N:G215C,N:D377Y,ORF1a:A1306S,ORF1a:P2046L,ORF1a:P2287S,ORF1a:T2877I,ORF1a:V2930L,ORF1a:L3116F,ORF1a:T3255I,ORF1a:T3646A,ORF1a:P4120H,ORF1b:P314L,ORF1b:G662S,ORF1b:P1000L,ORF1b:I1257V,ORF1b:A1918V,ORF3a:S26L,ORF3a:H78Y,ORF7a:V82A,ORF7a:T120I,ORF7b:T40I,ORF9b:T60A,S:T19R,S:D614G,S:P681R,S:D950N	ORF8:D119-,ORF8:F120-			C25624T|21L,T27291C|21J	T2827C,C8895T,C9611T,C11572T,C12624A,C18795T	0	2	6	8	21717-22034,22298-22542,22878-23144	S:52-158,S:246-327,S:439-528		3000	19.6296	good	830	10	0
hCoV-19/USA/WI-WSLH-222243/2021|EPI_ISL_8163542|2021-11-22	hCoV-19/USA/WI-WSLH-222243/2021	EPI_ISL_8163542	2021-11-22	21J	AY.103	B.1.617.2.103	21J	Delta	21J (Delta)	44.9501	mediocre	42	13	0	0	492	0	32	4	0	165	89118	55	29836	0.9795	false	G210T,C241T,C3037T,G4181T,C6402T,T6661C,C7124T,C8140T,C8986T,G9053T,C10029T,A11201G,A11332G,C11750T,G12202T,C14120T,C14408T,G15451A,C16466T,G16647T,A17236G,C19220T,C21618G,T22917G,C22995A,A23403G,C23604G,C24208T,G24410A,C25469T,T26767C,T27291C,G27459A,T27638C,C27752T,C27874T,G27967A,A28461G,G28881T,G28916T,G29402T,G29742T	22029-22034,28248-28253,28271			M:I82T,N:D63G,N:R203M,N:G215C,N:D377Y,ORF1a:A1306S,ORF1a:P2046L,ORF1a:P2287S,ORF1a:V2930L,ORF1a:T3255I,ORF1a:T3646A,ORF1a:L3829F,ORF1a:K3979N,ORF1b:P218L,ORF1b:P314L,ORF1b:G662S,ORF1b:P1000L,ORF1b:I1257V,ORF1b:A1918V,ORF3a:S26L,ORF7a:V82A,ORF7a:T120I,ORF7b:T40I,ORF8:C25Y,ORF9b:T60A,S:T19R,S:R158G,S:L452R,S:T478K,S:D614G,S:P681R,S:D950N	ORF8:D119-,ORF8:F120-,S:E156-,S:F157-			C8140T|22A,C11750T|22E&22B&23B,C14120T|20I,G16647T|20F,T27291C|21J	T6661C,G12202T,G27459A,G27967A	0	5	4	9	21717-21990,22325-22542	S:52-143,S:255-327		3000	7.11111	good	492	10	0
hCoV-19/USA/WI-MHDL-2021120043/2021|EPI_ISL_7281460|2021-11-23	hCoV-19/USA/WI-MHDL-2021120043/2021	EPI_ISL_7281460	2021-11-23	21J	AY.39	B.1.617.2.39	21J	Delta	21J (Delta)	4.34028	good	46	13	0	0	275	0	38	4	0	93	89102	55	29836	0.986757	false	G210T,C241T,G2231T,G2946A,C3037T,G3304T,G3433T,G4181T,C6402T,C7124T,C8655T,G8849A,C8986T,G9053T,C10029T,A11201G,A11332G,T13929C,C14408T,C15277T,G15451A,C16466T,C19220T,G21372T,C21618G,T22917G,C22995A,A23403G,A23524C,C23604G,G24410A,C25469T,C25546T,G25595T,T26767C,G27604A,T27638C,C27752T,C27874T,A28461G,G28881T,G28916T,G29402T,A29521T,G29742T,C29774T	22029-22034,28248-28253,28271			M:I82T,N:D63G,N:R203M,N:G215C,N:D377Y,ORF1a:A656S,ORF1a:G894D,ORF1a:E1013D,ORF1a:A1306S,ORF1a:P2046L,ORF1a:P2287S,ORF1a:S2797F,ORF1a:V2862M,ORF1a:V2930L,ORF1a:T3255I,ORF1a:T3646A,ORF1b:P314L,ORF1b:H604Y,ORF1b:G662S,ORF1b:P1000L,ORF1b:A1918V,ORF1b:Q2635H,ORF3a:S26L,ORF3a:L52F,ORF3a:R68I,ORF7a:V71I,ORF7a:V82A,ORF7a:T120I,ORF7b:T40I,ORF9b:T60A,S:T19R,S:R158G,S:L452R,S:T478K,S:D614G,S:E654D,S:P681R,S…	ORF8:D119-,ORF8:F120-,S:E156-,S:F157-				G2231T,G2946A,G3304T,G3433T,C8655T,G8849A,T13929C,C15277T,A23524C,C25546T,G25595T,A29521T,C29774T	0	0	13	13	17775,21717-21990	ORF1b:1436,S:52-143		3000	0	good	275	10	0
hCoV-19/USA/WI-MHDL-2021120128/2021|EPI_ISL_7809482|2021-11-23	hCoV-19/USA/WI-MHDL-2021120128/2021	EPI_ISL_7809482	2021-11-23	21J	AY.103	B.1.617.2.103	21J	Delta	21J (Delta)	50.1736	mediocre	39	13	0	0	5	0	31	4	0	3	89229	39	29853	0.99689	false	G210T,C241T,T2827C,C3037T,G4181T,C6402T,C7124T,C8986T,G9053T,C10029T,A11201G,A11332G,C11572T,C12624A,C14120T,C14408T,G15451A,C16045T,C16466T,A17236G,C19220T,C21618G,A22107T,T22917G,C22995A,A23403G,C23604G,C24208T,G24410A,C25469T,T26767C,T27291C,C27752T,C27874T,A28461G,G28881T,G28916T,G29402T,G29742T	22029-22034,28248-28253,28271			M:I82T,N:D63G,N:R203M,N:G215C,N:D377Y,ORF1a:A1306S,ORF1a:P2046L,ORF1a:P2287S,ORF1a:V2930L,ORF1a:T3255I,ORF1a:T3646A,ORF1a:P4120H,ORF1b:P218L,ORF1b:P314L,ORF1b:G662S,ORF1b:L860F,ORF1b:P1000L,ORF1b:I1257V,ORF1b:A1918V,ORF3a:S26L,ORF7a:T120I,ORF7b:T40I,ORF9b:T60A,S:T19R,S:R158G,S:K182I,S:L452R,S:T478K,S:D614G,S:P681R,S:D950N	ORF8:D119-,ORF8:F120-,S:E156-,S:F157-		A21987G,C27638T	C14120T|20I,T27291C|21J	T2827C,C11572T,C12624A,C16045T,A22107T	2	2	5	9	27557,27578-27581	ORF7a:55,ORF7a:62-63		3000	0	good	5	10	0
[truncated: 7,889 more rows]
[truncated: 26 more columns]
