# Supplementary material for: Genomic Surveillance Reveals the Rapid Expansion of the XBB Lineage among Circulating SARS-CoV-2 Omicron Lineages in Southeastern Wisconsin, USA
Source: Viruses. 2023 Sep 16;15(9):1940. doi: 10.3390/v15091940 (PMC10535685; doi:10.3390/v15091940)
Supplement: Supplementary file 1 [file viruses-15-01940-s001.zip › Table_S3.xlsx]

## Sheet: Sheet1
Table S3 - Distribution of 6,709 SARS-CoV-2 genomic sequences into 357 lineages/sub-lineages.
357 lineages/sublineages	Number_of_seq
BA.2.12.1	903
BA.2	734
BA.1.1	557
BA.5.2.1	425
AY.103	360
BA.1.15	310
XBB.1.5	267
BA.5.5	250
BA.1.20	224
BA.5.1	204
BA.5.2	200
BQ.1.1	199
BA.5.6	167
BA.1.17	166
BA.4.2	156
BA.2.3	135
BA.4.1	133
BA.1.1.18	120
AY.44	104
BA.4.6	99
BA.2.9	88
AY.25	84
AY.3	79
BA.1	65
BQ.1	65
BF.10	62
BQ.1.1.18	60
BF.7	47
BA.5.2.9	46
AY.100	41
BF.26	40
BA.2.10	39
XBB.1.5.13	37
BA.5.2.20	35
AY.39	34
BE.1	32
BQ.1.2	32
BE.1.1	31
BQ.1.3.2	31
BG.2	30
BQ.1.18	30
AY.119	27
BA.1.1.14	26
BA.5.1.10	26
BA.5.1.30	26
BA.5.1.1	25
XBB.1.5.52	25
BE.3	24
AY.4	23
BA.2.13	23
BA.5	23
BA.5.2.21	23
BF.27	23
BA.4	22
BA.4.6.5	19
BQ.1.10	19
AY.25.1	18
BF.7.4	18
BQ.1.1.5	18
CZ.2	18
XBK	18
BA.4.4	17
BF.5	17
BA.5.2.6	16
BF.21	16
B.1.617.2	15
BF.28	14
BA.4.1.8	13
BA.5.2.13	13
BF.7.24	13
BQ.1.13	13
XBB.1.5.15	13
AY.47	12
BA.5.2.14	12
BF.8	12
CK.1	12
XBB.2	12
AY.113	11
AY.118	11
BA.2.18	11
BA.2.9.7	11
BA.5.1.23	11
BA.5.2.57	11
BQ.1.1.45	11
AY.3.1	10
BA.2.8	10
BA.5.1.22	10
BF.11	10
BZ.2	10
AY.117	9
BA.1.17.2	9
BA.5.1.25	9
BA.5.1.27	9
BE.1.2.1	9
BN.1	9
BQ.1.11	9
DF.1.1	9
DN.1	9
XAE	9
XBB.1	9
AY.37	8
BE.1.2	8
BQ.1.1.3	8
XBB.1.5.19	8
XZ	8
AY.43	7
BA.5.1.6	7
BA.5.3	7
BN.1.2	7
XBB.1.5.33	7
AY.26	6
AY.39.1	6
BA.1.1.16	6
BA.2.75.2	6
BA.5.1.2	6
BQ.1.1.10	6
BQ.1.13.1	6
BQ.1.23	6
FL.8	6
XBB.1.5.11	6
BA.1.1.10	5
BA.1.15.2	5
BA.2.21	5
BA.5.2.23	5
BA.5.3.3	5
BE.9	5
BF.7.4.1	5
BQ.1.1.4	5
BQ.1.1.67	5
BQ.1.12	5
BQ.1.25.1	5
BQ.1.6	5
BQ.1.8	5
XBB.1.15	5
XBB.1.5.35	5
AY.120.1	4
BA.2.31	4
BA.2.7	4
BA.4.1.1	4
BA.5.1.3	4
BA.5.1.5	4
BA.5.1.7	4
BA.5.1.8	4
BA.5.2.19	4
BA.5.2.22	4
BA.5.2.3	4
BA.5.2.31	4
BA.5.6.2	4
BA.5.8	4
BF.1	4
BQ.1.1.27	4
BQ.1.1.69	4
BQ.1.14	4
BW.1	4
DN.2	4
XBB.1.5.48	4
XBB.1.5.49	4
AY.119.2	3
BA.1.18	3
BA.2.20	3
BA.2.26	3
BA.2.38	3
BA.2.40.1	3
BA.2.65	3
BA.4.1.6	3
BA.5.1.15	3
BA.5.1.18	3
BA.5.1.35	3
BA.5.2.27	3
BA.5.2.37	3
BA.5.2.4	3
BA.5.2.56	3
BE.1.4	3
BE.4	3
BF.1.1	3
BF.14	3
BF.7.22	3
BN.1.10	3
BQ.1.1.40	3
BQ.1.1.51	3
BQ.1.1.52	3
BQ.1.1.68	3
BQ.1.2.3	3
BQ.1.22	3
BU.1	3
BW.1.1.1	3
CH.1.1.25	3
CN.2	3
XBB.1.5.1	3
XBB.1.5.2	3
XBB.1.5.56	3
XBB.1.5.7	3
AY.122	2
AY.46.4	2
AY.75	2
BA.1.1.2	2
BA.1.15.1	2
BA.2.10.1	2
BA.2.3.2	2
BA.2.36	2
BA.2.48	2
BA.2.73	2
BA.2.75	2
BA.2.75.4	2
BA.2.75.5	2
BA.2.76	2
BA.5.2.16	2
BA.5.2.26	2
BA.5.2.53	2
BA.5.3.1	2
BA.5.5.2	2
BE.1.1.1	2
BE.2	2
BF.11.2	2
BF.13	2
BF.25	2
BF.32	2
BF.4	2
BF.7.5	2
BF.7.6	2
BG.5	2
BM.4.1.1	2
BN.1.3	2
BN.1.4	2
BN.1.5	2
BQ.1.1.1	2
BQ.1.1.2	2
BQ.1.1.65	2
BQ.1.5	2
CA.3	2
CM.2	2
DN.1.1	2
DT.2	2
EK.2	2
FD.2	2
XBB.1.5.16	2
XBB.1.5.3	2
XBB.1.5.31	2
XBB.1.5.32	2
XBB.1.5.5	2
XBB.1.5.51	2
XBB.1.9.1	2
AY.110	1
AY.120	1
AY.20	1
AY.98	1
AY.98.1	1
B.1.1.529	1
BA.1.1.1	1
BA.2.1	1
BA.2.13.1	1
BA.2.19	1
BA.2.23	1
BA.2.23.1	1
BA.2.3.14	1
BA.2.3.17	1
BA.2.3.6	1
BA.2.30	1
BA.2.37	1
BA.2.41	1
BA.2.47	1
BA.2.49	1
BA.2.62	1
BA.2.75.1	1
BA.2.75.10	1
BA.4.1.11	1
BA.4.1.4	1
BA.4.3	1
BA.4.7	1
BA.5.1.19	1
BA.5.1.21	1
BA.5.1.36	1
BA.5.2.12	1
BA.5.2.2	1
BA.5.2.28	1
BA.5.2.34	1
BA.5.2.35	1
BA.5.2.47	1
BA.5.2.62	1
BA.5.3.5	1
BA.5.5.3	1
BA.5.9	1
BE.1.1.2	1
BE.1.4.2	1
BF.24	1
BF.31	1
BF.36	1
BF.7.20	1
BF.7.7	1
BK.1	1
BL.1	1
BN.1.3.1	1
BN.1.3.3	1
BN.1.3.5	1
BN.1.4.3	1
BN.3.1	1
BQ.1.1.13	1
BQ.1.1.26	1
BQ.1.1.31	1
BQ.1.1.32	1
BQ.1.1.39	1
BQ.1.1.41	1
BQ.1.1.43	1
BQ.1.1.48	1
BQ.1.1.7	1
BQ.1.1.74	1
BQ.1.10.1	1
BQ.1.10.2	1
BR.2.1	1
BW.1.1	1
BY.1	1
CD.1	1
CH.1.1	1
CH.1.1.1	1
CH.1.1.11	1
CH.1.1.2	1
CK.2.1	1
CM.8.1	1
CP.1	1
CQ.2	1
DF.1	1
DK.1	1
DL.1	1
DT.3	1
DV.1	1
EE.2	1
EE.3	1
EE.5	1
EF.1.1	1
EK.2.1	1
EW.2	1
FD.4	1
FH.1	1
FL.2	1
FL.4	1
XAF	1
XAJ	1
XAP	1
XBB.1.16	1
XBB.1.16.1	1
XBB.1.19.1	1
XBB.1.34	1
XBB.1.5.12	1
XBB.1.5.17	1
XBB.1.5.20	1
XBB.1.5.21	1
XBB.1.5.28	1
XBB.1.5.34	1
XBB.1.5.47	1
XBB.1.5.59	1
XBB.1.5.62	1
XBB.1.5.66	1
XBB.1.5.8	1
XBB.1.9.2	1
XBB.2.3.4	1
XBB.2.6	1
XBF	1
