# Supplementary material for: Genomic Surveillance Reveals the Rapid Expansion of the XBB Lineage among Circulating SARS-CoV-2 Omicron Lineages in Southeastern Wisconsin, USA
Source: Viruses. 2023 Sep 16;15(9):1940. doi: 10.3390/v15091940 (PMC10535685; doi:10.3390/v15091940)
Supplement: Supplementary file 1 [file viruses-15-01940-s001.zip › Table_S4.xlsx]

## Sheet: Sheet1
Table S4 – Acknowledgment of Data Contributors. The hyperlinks provided can be used to access the data contributor details and GISAID’s EpiCoV database accession IDs of the SARS-CoV-2 genome sequences from samples of A) Southeast Wisconsin (6,709 sequenced at MHDL), B) Southeast Wisconsin (8,229 sequences), C) State of Wisconsin, D) United States populations,collected during Nov, 2021 – Apr, 2023…
Panel	Description of the data	Summary	GISAID identifier link	Secondary link to collect data
A	SARS-COV-2 GENOME SEQUENCES FROM SOUTHEAST WISCONSIN POPULATION – MHDL DATA	EPI_SET_230530hm is composed of 6,709 individual genome sequences. The collection dates range from 2021-11-01 to 2023-03-27. Data were collected in 1 countries and territories. All sequences in this dataset are compared relative to hCoV-19/Wuhan/WIV04/2019 (WIV04), the official reference sequence employed by GISAID (EPI_ISL_402124).	https://doi.org/10.55876/gis8.230530hm	https://epicov.org/epi3/epi_set/230530hm?main=true
B	SARS-COV-2 GENOME SEQUENCES FROM SOUTHEAST WISCONSIN POPULATION – MHDL & PUBLIC DATA	EPI_SET_230530vh composed of 8,229 individual genome sequences. The collection dates range from 2021-11-01 to 2023-03-27. Data were collected in 1 countries and territories. All sequences in this dataset are compared relative to hCoV-19/Wuhan/WIV04/2019 (WIV04), the official reference sequence employed by GISAID (EPI_ISL_402124).	https://doi.org/10.55876/gis8.230530vh	https://epicov.org/epi3/epi_set/230530vh?main=true
C	SARS-COV-2 GENOME SEQUENCES FROM WISCONSIN STATE POPULATION	EPI_ISL_230530my is composed of 47,103 individual genome sequences. The collection dates range from 2021-11-01 to 2023-04-30; Data were collected in 1 countries and territories; All sequences in this dataset are compared relative to hCoV-19/Wuhan/WIV04/2019 (WIV04), the official reference sequence employed by GISAID (EPI_ISL_402124).	https://doi.org/10.55876/gis8.230530my	https://epicov.org/epi3/epi_set/230530my?main=true
D	SARS-COV-2 GENOME SEQUENCES FROM UNITED STATES POPULATION	EPI_SET_230530ye is composed of 2,850,903 individual genome sequences. The collection dates range from 2021-11-01 to 2023-04-30; Data were collected in 7 countries and territories; All sequences in this dataset are compared relative to hCoV-19/Wuhan/WIV04/2019 (WIV04), the official reference sequence employed by GISAID (EPI_ISL_402124).	https://doi.org/10.55876/gis8.230530ye	https://epicov.org/epi3/epi_set/230530ye?main=true
E	SARS-COV-2 GENOME SEQUENCES FROM GLOBAL DATA SUBSET	EPI_SET_230711xm is composed of 884 individual genome sequences. The collection dates range from 2022-11-20 to 2023-04-30; Data were collected in 111 countries and territories; All sequences in this dataset are compared relative to hCoV-19/Wuhan/WIV04/2019 (WIV04), the official reference sequence employed by GISAID (EPI_ISL_402124).	https://doi.org/10.55876/gis8.230711xm	https://epicov.org/epi3/epi_set/230711xm?main=true
	Note: All genome sequences and associated metadata in this data set are published in GISAID’s EpiCoV database. To view the contributors of each individual sequence with details such as accession number, Virus name, Collection date, Originating Lab and Submitting Lab and the list of Authors.
