# Supplementary material for: Genomic Surveillance Reveals the Rapid Expansion of the XBB Lineage among Circulating SARS-CoV-2 Omicron Lineages in Southeastern Wisconsin, USA
Source: Viruses. 2023 Sep 16;15(9):1940. doi: 10.3390/v15091940 (PMC10535685; doi:10.3390/v15091940)
Supplement: Supplementary file 1 [file viruses-15-01940-s001.zip › Table_S5.xlsx]

## Sheet: Sheet1
Table S5 – The mutational profile of 267 Spike sequences of dominant XBB.1.5 lineage identified in our comprehensive data set.
S.no	Mutations(aa)	Frequency (n=267)	%
1	S:L5F	6	2.24719		Not in reference list of CoVariant database; unique to our sequences
2	S:N17Y	1	0.374532
3	S:T19I	261	97.7528		NTD, N-Terminal Domain (13-305 aa)
4	S:A27S	262	98.1273
5	S:Y28H	1	0.374532		RBD, Receptor-binding Domain (319-541 aa)
6	S:T29I	1	0.374532
7	S:H49Y	2	0.749064		Furin Cleavage Site (681-685 aa)
8	S:R78M	1	0.374532
9	S:V83A	266	99.6255		HR1, Heptad Repeat Region 1 (912-984 aa)
10	S:G142D	264	98.8764
11	S:H146K	9	3.37079		All defining mutations are not color coded in columns B and C.
12	S:H146Q	251	94.0075
13	S:N148T	1	0.374532
14	S:Q183E	258	96.6292
15	S:K206R	1	0.374532
16	S:V213E	258	96.6292
17	S:L216F	1	0.374532
18	S:P251S	1	0.374532
19	S:G252V	133	49.8127
20	S:T307I	1	0.374532
21	S:T323R	17	6.36704
22	S:E324K	1	0.374532
23	S:G339H	262	98.1273
24	S:R346T	260	97.3783
25	S:R346S	1	0.374532
26	S:K356T	1	0.374532
27	S:L368I	256	95.8801
28	S:S371F	259	97.0037
29	S:S373P	260	97.3783
30	S:S375F	260	97.3783
31	S:T376A	259	97.0037
32	S:V382L	1	0.374532
33	S:T393A	1	0.374532
34	S:D405N	259	97.0037
35	S:R408S	256	95.8801
36	S:K417N	256	95.8801
37	S:V433I	1	0.374532
38	S:N440K	256	95.8801
39	S:V445P	255	95.5056
40	S:G446S	256	95.8801
41	S:N460K	256	95.8801
42	S:S477N	260	97.3783
43	S:T478K	258	96.6292
44	S:T478E	1	0.374532
45	S:G482R	6	2.24719
46	S:E484A	260	97.3783
47	S:F486P	257	96.2547
48	S:F490S	256	95.8801
49	S:S494P	1	0.374532
50	S:Q498R	260	97.3783
51	S:P499L	1	0.374532
52	S:N501Y	260	97.3783
53	S:Y505H	260	97.3783
54	S:V511I	3	1.1236
55	S:T572I	1	0.374532
56	S:D614G	262	98.1273
57	S:P621S	1	0.374532
58	S:A623V	1	0.374532
59	S:H655Y	262	98.1273
60	S:Q677H	1	0.374532
61	S:N679K	261	97.7528
62	S:P681H	262	98.1273
63	S:Q690L	1	0.374532
64	S:A701V	2	0.749064
65	S:N764K	261	97.7528
66	S:D796Y	261	97.7528
67	S:P812S	1	0.374532
68	S:A846V	1	0.374532
69	S:I850V	1	0.374532
70	S:Q954H	261	97.7528
71	S:N969K	260	97.3783
72	S:I997V	1	0.374532
73	S:A1020V	1	0.374532
74	S:G1085R	1	0.374532
75	S:P1112S	1	0.374532
76	S:D1168E	1	0.374532
77	S:L1203F	1	0.374532
