# Supplementary material for: Genomic Surveillance Reveals the Rapid Expansion of the XBB Lineage among Circulating SARS-CoV-2 Omicron Lineages in Southeastern Wisconsin, USA
Source: Viruses. 2023 Sep 16;15(9):1940. doi: 10.3390/v15091940 (PMC10535685; doi:10.3390/v15091940)
Supplement: Supplementary file 1 [file viruses-15-01940-s001.zip › Table_S6.xlsx]

## Sheet: Sheet1
Table S6 – Details of genetically closest and related genomes of randomly selected 30 XBB.1.5 genomes from Southeastern Wisconsin population.
S.No.	seqName	GISAID_id	County	Closest genome	Related genome within SERW	Related genome in Wisconsin (earliest collection date)	Related genome in USA (earliest collection date	Related genome Worldwide (earliest collection date)
1	hCoV-19/USA/WI-MHDL-010092/2022|EPI_ISL_16454816|2022-12-27	EPI_ISL_16454816	Milwaukee	Milwaukee county, EPI_ISL_16543797, 12/27/2022	Milwaukee county, EPI_ISL_16543797, 12/27/2022	No	New York City, EPI_ISL_16001777, 11/22/2022	Poland, EPI_ISL_17193891, 2/5/2023
2	hCoV-19/USA/WI-MHDL-010098/2022|EPI_ISL_16543797|2022-12-27	EPI_ISL_16543797	Milwaukee	Milwaukee county, EPI_ISL_16454816, 12/27/2022	Milwaukee county, EPI_ISL_16454816, 12/27/2022	No	New York City, EPI_ISL_16001777, 11/22/2022	Poland, EPI_ISL_17193891, 2/5/2023
3	hCoV-19/USA/WI-MHDL-010129/2022|EPI_ISL_16543824|2022-12-30	EPI_ISL_16543824	Washington	Massachusetts, EPI_ISL_16480575, 12/28/2022	No	No	New York City, EPI_ISL_16001777, 11/22/2022	Canada, EPI_ISL_16837565, 1/23/2023
4	hCoV-19/USA/WI-MHDL-010144/2023|EPI_ISL_16543837|2023-01-03	EPI_ISL_16543837	Waukesha	Nevada, EPI_ISL_17261419, 3/9/2023	No	No	New York City, EPI_ISL_16490370, 11/2/2022	Denmark, EPI_ISL_16646679, 1/6/2023
5	hCoV-19/USA/WI-MHDL-010153/2023|EPI_ISL_16543845|2023-01-04	EPI_ISL_16543845	Milwaukee	Maryland, EPI_ISL_17394045, 3/25/2023	Washington County, EPI_ISL_16845919, 1/16/2023	Wisconsin, EPI_ISL_16890976, 12/31/2022	California, EPI_ISL_17560170, 12/25/2022	Netherlands, EPI_ISL_16178438, 12/7/2022
6	hCoV-19/USA/WI-MHDL-010155/2023|EPI_ISL_16543846|2023-01-05	EPI_ISL_16543846	Milwaukee	California, EPI_ISL_17085033, 2/1/2023	No	No	New York, EPI_ISL_16507853, 1/12/2022	Moldova, EPI_ISL_16523949, 1/8/2023
7	hCoV-19/USA/WI-MHDL-010201/2023|EPI_ISL_16581610|2023-01-03	EPI_ISL_16581610	Milwaukee	Milwaukee county, EPI_ISL_16581613, 1/2/2023	Milwaukee county, EPI_ISL_16581613, 1/2/2023	No	New York City, EPI_ISL_16272354, 12/12/2022	Netherlands, EPI_ISL_16617805, 1/8/2023
8	hCoV-19/USA/WI-MHDL-010204/2023|EPI_ISL_16581613|2023-01-03	EPI_ISL_16581613	Milwaukee	Milwaukee county, EPI_ISL_16581610, 1/2/2023	Milwaukee county, EPI_ISL_16581610, 1/2/2023	No	New York City, EPI_ISL_16272354, 12/12/2022	Netherlands, EPI_ISL_16617805, 1/8/2023
9	hCoV-19/USA/WI-MHDL-010213/2023|EPI_ISL_16581620|2023-01-06	EPI_ISL_16581620	Milwaukee	Milwaukee County, EPI_ISL_16581622, 1/5/2023	Milwaukee County, EPI_ISL_16581621, EPI_ISL_16581622, 1/5/2023	No	Utah, EPI_ISL_16252523, 12/4/2022	United Kingdom, EPI_ISL_17446534, 12/31/2022
10	hCoV-19/USA/WI-MHDL-010214/2023|EPI_ISL_16581621|2023-01-06	EPI_ISL_16581621	Milwaukee	Milwaukee County, EPI_ISL_16581620, 1/5/2023	Milwaukee County, EPI_ISL_16581620, EPI_ISL_16581622, 1/5/2023	No	Utah, EPI_ISL_16252523, 12/4/2022	United Kingdom, EPI_ISL_17446534, 12/31/2022
11	hCoV-19/USA/WI-MHDL-010215/2023|EPI_ISL_16581622|2023-01-06	EPI_ISL_16581622	Milwaukee	Milwaukee County, EPI_ISL_16581620, 1/5/2023	Milwaukee County, EPI_ISL_16581620, EPI_ISL_16581621, 1/5/2023	No	Utah, EPI_ISL_16252523, 12/4/2022	Bangladesh, EPI_ISL_15157632, 9/10/2022
12	hCoV-19/USA/WI-MHDL-010244/2023|EPI_ISL_16611158|2023-01-16	EPI_ISL_16611158	Washington	Wisconsin, EPI_ISL_16659547, 1/13/2023	Waukesha County, EPI_ISL_17197966, 2/27/2023	Wisconsin, EPI_ISL_16659547, 1/13/2023	Connecticut, EPI_ISL_15948622, 11/18/2022	Ireland, EPI_ISL_16648548, 1/7/2023
13	hCoV-19/USA/WI-MHDL-010267/2023|EPI_ISL_16701985|2023-01-12	EPI_ISL_16701985	Milwaukee	Milwaukee County, EPI_ISL_16887455, 2/2/2023	Milwaukee County, EPI_ISL_16887455, 2/2/2023	Wisconsin, EPI_ISL_17393301, 3/15/2023	New York, EPI_ISL_15706596, 10/21/2022	Austria, EPI_ISL_16280651, 12/20/2022
14	hCoV-19/USA/WI-MHDL-010270/2023|EPI_ISL_16701988|2023-01-16	EPI_ISL_16701988	Milwaukee	Virginia, EPI_ISL_16710330, 1/15/2023	Milwaukee County, EPI_ISL_16710921, 1/17/2023	No	North Carolina, EPI_ISL_15931453, 11/14/2022	England, EPI_ISL_16074258, 11/29/2022
15	hCoV-19/USA/WI-MHDL-010272/2023|EPI_ISL_16701990|2023-01-16	EPI_ISL_16701990	Milwaukee	Washington, EPI_ISL_17205174, 2/28/2023	Milwaukee County, EPI_ISL_16888920, 1/30/2023; Waukesha County, EPI_ISL_17603386, 2/1/2023	Rock County, EPI_ISL_16891101, 1/13/2023	Massachusetts, EPI_ISL_15793498, 11/3/2022	Singapore, EPI_ISL_16482938, 1/3/2023
16	hCoV-19/USA/WI-MHDL-010320/2023|EPI_ISL_16710921|2023-01-18	EPI_ISL_16710921	Milwaukee	New Jersey, EPI_ISL_16169057, 12/4/2022	No	No	North Carolina, EPI_ISL_15931453, 11/14/2022	England, EPI_ISL_16074258, 11/29/2022
17	hCoV-19/USA/WI-MHDL-010327/2023|EPI_ISL_16755857|2023-01-20	EPI_ISL_16755857	Milwaukee	Texas, EPI_ISL_17121468, 1/16/2023	No	Wisconsin, EPI_ISL_16907439, 1/27/2023	New York City, EPI_ISL_16173506, 12/8/2022	Mexico, EPI_ISL_16819482, 12/18/2022
18	hCoV-19/USA/WI-MHDL-010334/2023|EPI_ISL_16755862|2023-01-20	EPI_ISL_16755862	Waukesha	Kentucky, EPI_ISL_16915698, 2/3/2023	Milwaukee county, EPI_ISL_16543845, 1/3/2023	Dodge County, EPI_ISL_16891133, 1/9/2023	California, EPI_ISL_16651901, 12/27/2022	Germany, EPI_ISL_16217167, 12/7/2022
19	hCoV-19/USA/WI-MHDL-020054/2023|EPI_ISL_16841055|2023-01-26	EPI_ISL_16841055	Milwaukee	Milwaukee county, EPI_ISL_16841060, 1/24/2023	Milwaukee county, EPI_ISL_16841073, 1/22/2023	Wisconsin, EPI_ISL_16835398, 1/22/2023	New York, EPI_ISL_16268337, 12/10/2022	Singapore, EPI_ISL_16294679, 12/19/2022
20	hCoV-19/USA/WI-MHDL-020053/2023|EPI_ISL_16841060|2023-01-25	EPI_ISL_16841060	Milwaukee	Milwaukee county, EPI_ISL_17024139, 2/5/2023	Milwaukee county, EPI_ISL_16841073, 1/22/2023	Wisconsin, EPI_ISL_16835398, 1/22/2023	Ohio, EPI_ISL_16318370, 12/8/2022	Israel, EPI_ISL_16739823, 12/11/2022
21	hCoV-19/USA/WI-MHDL-020060/2023|EPI_ISL_16841061|2023-01-25	EPI_ISL_16841061	Milwaukee	Israel, EPI_ISL_17208786, 3/2/2023	No	No	New York, EPI_ISL_16168078, 11/30/2022	Canada, EPI_ISL_17462175, 3/22/2023
22	hCoV-19/USA/WI-MHDL-020032/2023|EPI_ISL_16841062|2023-01-24	EPI_ISL_16841062	Milwaukee	Illinois, EPI_ISL_17180201, 2/21/2023	Milwaukee county, EPI_ISL_17403575, 3/14/2023; Kenosha county, EPI_ISL_17694607, 3/27/2023	No	Illinois, EPI_ISL_16870891, 1/19/2023	Canada, EPI_ISL_17064137, 2/15/2023
23	hCoV-19/USA/WI-MHDL-020038/2023|EPI_ISL_16841063|2023-01-24	EPI_ISL_16841063	Milwaukee	Milwaukee county, EPI_ISL_16965402, 2/6/2023	Milwaukee county, EPI_ISL_16965402, 2/6/2023	No	Rhode Island, EPI_ISL_16705871, 11/27/2022	Israel, EPI_ISL_16679786, 12/31/2022
24	hCoV-19/USA/WI-MHDL-020031/2023|EPI_ISL_16841069|2023-01-23	EPI_ISL_16841069	Milwaukee	New Hampshire, EPI_ISL_17034739, 1/5/2023	Milwaukee County, EPI_ISL_16710921, 1/17/2023	No	North Carolina, EPI_ISL_15931453, 11/14/2022	England, EPI_ISL_16074258, 11/29/2022
25	hCoV-19/USA/WI-MHDL-020043/2023|EPI_ISL_16841071|2023-01-23	EPI_ISL_16841071	Milwaukee	Milwaukee county, EPI_ISL_16965409, 2/8/2023	Waukesha County, EPI_ISL_17156960, 1/25/2023; Milwaukee county, EPI_ISL_16965409, 2/8/2023	Wood county, EPI_ISL_17195552, 2/1/2023	Connecticut, EPI_ISL_15687678, 10/26/2022	South Korea, EPI_ISL_16419250, 12/15/2022
26	hCoV-19/USA/WI-MHDL-020055/2023|EPI_ISL_16841073|2023-01-23	EPI_ISL_16841073	Milwaukee	Milwaukee county, EPI_ISL_16841060, 1/24/2023	Milwaukee county, EPI_ISL_16841060, 1/24/2023	Wisconsin, EPI_ISL_16835398, 1/22/2023	New York, EPI_ISL_16268337, 12/10/2022	Singapore, EPI_ISL_16294679, 12/19/2022
27	hCoV-19/USA/WI-MHDL-020013/2023|EPI_ISL_16845919|2023-01-17	EPI_ISL_16845919	Washington	Washington county, EPI_ISL_16845920, 1/16/2023	Milwaukee county, EPI_ISL_16543845, 1/3/2023; Washington county, EPI_ISL_16845920, 1/16/2023	Wisconsin, EPI_ISL_16890976, 12/31/2022	New York City, EPI_ISL_16173506, 12/8/2022	Netherlands, EPI_ISL_16178438, 12/7/2022
28	hCoV-19/USA/WI-MHDL-020014/2023|EPI_ISL_16845920|2023-01-17	EPI_ISL_16845920	Washington	Washington county, EPI_ISL_16845928, 1/20/2023	Milwaukee county, EPI_ISL_16543845, 1/3/2023; Washington county, EPI_ISL_16845919, 1/16/2023	Wisconsin, EPI_ISL_16890976, 12/31/2022	New York City, EPI_ISL_16173506, 12/8/2022	Netherlands, EPI_ISL_16178438, 12/7/2022
29	hCoV-19/USA/WI-MHDL-020022/2023|EPI_ISL_16845928|2023-01-21	EPI_ISL_16845928	Washington	Washington county, EPI_ISL_16845920, 1/16/2023	Milwaukee county, EPI_ISL_16543845, 1/3/2023; Washington county, EPI_ISL_16845919, 1/16/2023	Wisconsin, EPI_ISL_16890976, 12/31/2022	New York City, EPI_ISL_16173506, 12/8/2022	Netherlands, EPI_ISL_16178438, 12/7/2022
30	hCoV-19/USA/WI-MHDL-020029/2023|EPI_ISL_16845932|2023-01-25	EPI_ISL_16845932	Milwaukee	Wisconsin, EPI_ISL_17603692, 3/5/2023	No	Wisconsin, EPI_ISL_16906916, 1/25/2023	New York City, EPI_ISL_16343752, 12/18/2022	South Africa, EPI_ISL_16978110, 2/2/2023
	These genomes have nearly 1000 related genomes in the GISAID
	Household transmission-I (EPI_ISL_16454816, Unknown (~Female), 59 yrs; EPI_ISL_16543797, Male, 62 yrs)
	Household transmission-II (EPI_ISL_16581610, Unknown (~Female), 44 yrs; EPI_ISL_16581613, Female, 9 yrs)
	Household transmission-III (EPI_ISL_16581620, Male, 11 yrs ; EPI_ISL_16581621, Male, 14 yrs; EPI_ISL_16581622, Male, 16 yrs)
	Household transmission-IV (EPI_ISL_16845919, Male, 84 yrs; EPI_ISL_16845920; Male 90 yrs; EPI_ISL_16845928, Female, 52 yrs)
